# Supplementary material for: SMAD1 Is Dispensable for CDX2 Induction but Required for the Repression of Ectopic Small-Intestinal Gene Expression in Human-Pluripotent-Stem-Cell-Derived Colonic Organoids
Source: MDPI journal article supplement (doi:10.3390/organoids2040015), 2023-11-14
Supplement: s1 [file s1]

Archive with 7 entries (7 files):
- Supplementary Figure S1.pdf
- Supplementary Figure S2.pdf
- Supplementary Table S1. DE-seq2 of 35d  WT and SMAD1 KO HCOs.xlsx
- Supplementary Table S2. UP in WT co-expression analysis.xlsx
- Supplementary Table S3. UP in SMAD1 KO  co-expression analysis.xlsx
- Supplementary Table S4. Oligos used in the study.xlsx
- Supplementary Table S5. Antibodies used in the study.xlsx
