# Supplementary material for: SMAD1 Is Dispensable for CDX2 Induction but Required for the Repression of Ectopic Small-Intestinal Gene Expression in Human-Pluripotent-Stem-Cell-Derived Colonic Organoids
Source: MDPI journal article supplement (doi:10.3390/organoids2040015), 2023-11-14
Supplement: s1 [file s1 › Supplementary Table S1. DE-seq2 of 35d WT and SMAD1 KO HCOs.xlsx]

## Sheet: gene_list (14)
Feature ID	P-value (K3_SMAD1 K/O_BMP2 vs K3_WT_BMP2)	FDR step up (K3_SMAD1 K/O_BMP2 vs K3_WT_BMP2)	Ratio (K3_SMAD1 K/O_BMP2 vs K3_WT_BMP2)	Fold change (K3_SMAD1 K/O_BMP2 vs K3_WT_BMP2)	LSMean(K3_SMAD1 K/O_BMP2) (K3_SMAD1 K/O_BMP2 vs K3_WT_BMP2)	LSMean(K3_WT_BMP2) (K3_SMAD1 K/O_BMP2 vs K3_WT_BMP2)
H19	1.21558e-77	2.16531e-73	0.0013616	-734.432	10.5875	7775.78
H19	1.17108e-34	1.04302e-30	0.00144646	-691.342	13.081	9043.48
H19	1.4961e-29	6.66249e-26	0.00211493	-472.83	2.57344	1216.8
PCDHB5	8.88628e-33	5.27638e-29	0.0120828	-82.7626	0.725368	60.0333
MYH11	5.75898e-05	0.0233147	0.0291802	-34.2698	0.217957	7.46934
MYH11	1.50204e-05	0.00910301	0.0317183	-31.5275	0.44772	14.1155
CRMP1	0.000647061	0.0893496	0.0520261	-19.2211	0.0337153	0.648045
MYLK	0.0279292	0.539007	0.0582386	-17.1707	1.38466	23.7756
DCX	0.00478975	0.226914	0.0701456	-14.2561	0.104914	1.49566
SEMA5B	0.00121656	0.115618	0.0712198	-14.041	0.156795	2.20157
ASTN2	0.00138879	?	0.0726623	-13.7623	0.319092	4.39144
TAF1C	0.00066214	?	0.0734247	-13.6194	0.292362	3.98179
NSG1	1.59324e-05	0.00915495	0.0736411	-13.5794	0.208163	2.82672
GRIN3A	1.26761e-05	0.009032	0.0820023	-12.1948	0.306788	3.74121
NBPF15	0.00144284	?	0.0839401	-11.9133	0.161363	1.92236
LOC101928595	1.19843e-09	3.04967e-06	0.0879075	-11.3756	1.17843	13.4054
ACTR3B	0.00261727	?	0.0962081	-10.3941	0.197442	2.05224
LMF1	6.50289e-05	?	0.0975372	-10.2525	0.409869	4.20218
SOSTDC1	0.0134415	0.367984	0.101323	-9.86943	2.2256	21.9654
PSCA	0.000161833	0.042688	0.106904	-9.35419	34.6837	324.438
C11orf87	6.82116e-05	0.0264142	0.108222	-9.24023	0.802197	7.41249
ZNF43	0.0132254	?	0.11376	-8.79045	0.354416	3.11547
PICALM	6.31366e-05	0.0249923	0.117062	-8.54249	0.242241	2.06934
OLFML1	0.000757786	0.0928796	0.118203	-8.46	0.490958	4.15351
DHRS2	0.00111323	0.109558	0.118893	-8.41094	4.01471	33.7675
PRKG1	0.000637865	?	0.122491	-8.16384	0.440768	3.59836
NOVA1	0.00091504	0.0987855	0.123099	-8.12352	0.301275	2.44741
OPRK1	0.00138524	?	0.123303	-8.11008	0.511848	4.15113
OPRK1	0.00138524	?	0.123303	-8.11008	0.511848	4.15113
PDZD4	0.00198233	0.147746	0.12631	-7.917	0.288119	2.28104
KRT7	0.0251619	0.50875	0.127926	-7.81703	105.88	827.668
SLITRK3	0.0295083	?	0.131479	-7.6058	0.482807	3.67213
TSPAN17	0.00506918	?	0.131663	-7.59517	0.476759	3.62107
PTHLH	0.0141867	?	0.132582	-7.54249	1.69641	12.7952
RGS5	0.00339558	?	0.13668	-7.31636	0.582414	4.26115
UACA	0.00625514	?	0.141351	-7.07461	0.581006	4.11039
ENOPH1	0.0170062	?	0.144127	-6.93833	0.270366	1.87589
WNT7A	0.00729695	0.275383	0.144853	-6.90357	1.8444	12.7329
ZFP14	0.0218071	?	0.146619	-6.82039	0.295745	2.01709
MARCKSL1	0.0019181	0.146387	0.147457	-6.78165	2.09618	14.2156
RGS5	1.5331e-05	0.00910301	0.148961	-6.71314	5.86373	39.3641
RHNO1	0.00938861	?	0.149676	-6.68109	0.332033	2.21835
EPB41	0.000575425	?	0.14976	-6.67737	0.468209	3.1264
EPHB6	3.33585e-06	0.00396143	0.149832	-6.67415	5.30216	35.3874
IFI44L	0.0235885	?	0.149937	-6.66945	0.241685	1.6119
NCAM2	0.00673144	?	0.151246	-6.61176	0.286445	1.8939
CACNA1C	0.0183559	?	0.151755	-6.58955	0.349957	2.30606
PENK	0.00188808	0.146387	0.155695	-6.4228	1.09114	7.00817
HMMR	0.0268705	?	0.156751	-6.37955	0.245138	1.56387
KLF11	0.0114862	?	0.159143	-6.28364	0.491212	3.0866
GDF10	0.0277277	0.536799	0.160991	-6.21153	2.57894	16.0192
CCP110	0.011755	?	0.161889	-6.17706	0.350213	2.16329
TLE4	0.0112771	?	0.162515	-6.15328	0.523382	3.22052
NNAT	2.11155e-06	0.00313442	0.1627	-6.14628	1.3934	8.56423
MAP4K4	0.0036868	0.200222	0.162874	-6.13973	0.368243	2.26091
TMEM231	0.0106041	?	0.166199	-6.01688	0.261229	1.57178
STARD4	0.00646179	?	0.167012	-5.98761	0.986215	5.90507
VASH2	0.000514554	0.0783397	0.167361	-5.97512	1.5504	9.26385
SH2B1	0.024273	?	0.167625	-5.96569	0.26479	1.57966
R3HDM1	0.0145703	0.382239	0.169575	-5.89711	1.70498	10.0545
TUBB4A	0.0404749	?	0.170048	-5.8807	0.177295	1.04262
SLC12A6	0.0274155	?	0.170812	-5.8544	0.546253	3.19798
CCP110	0.00239205	?	0.172096	-5.81071	0.573815	3.33427
FAM131B	0.00545472	?	0.172132	-5.80948	0.228854	1.32952
P4HA3	0.00524098	?	0.173252	-5.77195	0.798934	4.6114
MYLK	0.0261978	?	0.173444	-5.76554	1.43763	8.28875
SOX21	0.0183853	?	0.173739	-5.75576	0.543855	3.1303
IFI6	0.0494981	0.702182	0.174829	-5.71988	2.58806	14.8034
HSPBP1	0.0154208	?	0.175151	-5.70937	0.233808	1.3349
TTLL7	0.0359898	?	0.181946	-5.49614	0.392126	2.15518
SNRPN	0.00825276	?	0.182458	-5.48071	0.727994	3.98993
ATXN7L1	0.0297721	?	0.182655	-5.47481	0.628687	3.44194
CNTN1	0.00566135	0.245367	0.183063	-5.46261	0.187196	1.02258
STIL	0.0152639	?	0.185241	-5.39838	0.366916	1.98075
KCNMB1	0.00424268	0.214338	0.186402	-5.36475	0.995293	5.3395
PDE4D	0.0360714	?	0.187567	-5.33142	0.352486	1.87925
MAMLD1	0.00297681	0.180976	0.190406	-5.25195	0.650539	3.4166
TLL2	0.0264063	?	0.192669	-5.19026	0.967887	5.02359
NOVA1	0.0348572	?	0.193372	-5.17139	0.332938	1.72175
LRRN3	0.0143591	0.37837	0.193491	-5.16819	2.37559	12.2775
COL24A1	0.0132569	0.364122	0.195487	-5.11544	0.986323	5.04547
SERPINB7	0.0171071	0.414597	0.196133	-5.09857	4.12756	21.0447
NIPAL4	0.0149135	0.383623	0.196448	-5.0904	5.60427	28.528
GIGYF2	0.0290692	?	0.199289	-5.01784	0.548934	2.75446
DKK1	0.0434216	0.657553	0.199326	-5.01692	12.8852	64.644
ZNF558	0.00645341	?	0.199645	-5.0089	0.741103	3.71211
SCUBE2	0.00424719	0.214338	0.201006	-4.97498	1.06886	5.31758
TRPC4	0.0475552	?	0.202072	-4.94873	0.358255	1.7729
CAMK2G	0.00758269	?	0.202175	-4.9462	1.28983	6.37975
ADAMTS8	0.0376589	?	0.202579	-4.93634	1.72498	8.5151
PAK3	0.0390937	?	0.203128	-4.92301	0.262543	1.2925
NEFL	0.000222027	0.050488	0.2032	-4.92127	2.89588	14.2514
ZNF558	0.0104663	?	0.203839	-4.90584	0.649625	3.18696
EYA4	0.0497826	?	0.205153	-4.87441	0.257319	1.25428
TSC22D3	0.0339868	?	0.208961	-4.78557	0.507083	2.42668
B4GALNT1	0.0173487	?	0.209288	-4.7781	0.930989	4.44836
MAP2	0.0100508	0.32261	0.210245	-4.75635	0.829576	3.94575
LSM12	0.0137032	?	0.21164	-4.725	0.961585	4.54348
MRPS35	0.0473188	?	0.211744	-4.72267	0.646762	3.05445
MELK	0.0207397	?	0.212411	-4.70786	0.50044	2.356
DDR1	0.000852951	0.0969174	0.212644	-4.70271	1.32916	6.25067
IFI6	0.0298385	0.556842	0.212658	-4.70239	19.3925	91.1911
PDE5A	0.00819619	0.293484	0.213799	-4.6773	0.959701	4.48881
DLX2	0.0163349	0.403568	0.214565	-4.6606	0.186562	0.869493
LAS1L	0.0158496	?	0.215287	-4.64495	0.272411	1.26533
WT1	0.007071	0.272768	0.215446	-4.64153	2.76513	12.8344
COL13A1	0.0159983	?	0.215578	-4.63869	0.503878	2.33733
COL9A1	0.00366586	0.199694	0.215596	-4.63831	1.29541	6.0085
TBCK	0.0484372	?	0.216684	-4.61502	0.438697	2.02459
SULF1	0.00128542	0.119881	0.21669	-4.6149	5.29714	24.4458
CSMD3	0.0289897	?	0.21772	-4.59306	1.2147	5.57918
SAE1	0.0267687	?	0.21815	-4.58399	0.957509	4.38922
RASD2	0.0487206	?	0.219424	-4.55739	0.445082	2.02841
ABCA9	0.00978347	0.318168	0.220246	-4.54037	0.52331	2.37602
NFIB	0.00813119	0.2932	0.220559	-4.53393	1.61421	7.31871
NFIB	0.0127096	0.361079	0.220573	-4.53365	1.17486	5.32641
DLL3	0.0172378	0.415504	0.22164	-4.51182	0.180964	0.816476
ARHGEF9	0.0383698	?	0.22174	-4.50979	0.410799	1.85262
ARHGEF9	0.0408682	?	0.221744	-4.50971	0.395727	1.78461
DTNA	0.0248484	?	0.222465	-4.49509	0.547367	2.46047
ANLN	0.012885	?	0.222591	-4.49255	0.569582	2.55887
GAS2	0.012445	0.356977	0.223574	-4.4728	2.14473	9.59295
PDE10A	0.0244771	?	0.224425	-4.45583	0.454576	2.02551
TENM2	0.00101246	0.103057	0.225154	-4.44141	1.67338	7.43217
LCP1	0.000870411	0.0969174	0.226099	-4.42285	9.97177	44.1036
KIAA1549L	0.0117834	0.346939	0.226413	-4.41671	1.6432	7.25752
ZNF550	0.0414331	?	0.226676	-4.41159	0.681136	3.00489
CDK2AP1	0.000662053	0.089958	0.227289	-4.39968	2.11041	9.28512
TUBB4A	0.000294085	0.0576268	0.227469	-4.3962	3.5186	15.4685
RAD54B	0.0367397	?	0.231288	-4.32362	0.828865	3.58369
POGK	0.0128679	0.362053	0.232347	-4.30392	1.22435	5.26951
SULF1	0.00318067	0.186469	0.232563	-4.29991	2.1521	9.25383
BIN1	0.00332459	0.191035	0.232588	-4.29944	0.438193	1.88399
NTM	0.00978206	0.318168	0.232609	-4.29906	5.56848	23.9392
EHBP1	0.0037891	0.203299	0.233961	-4.27421	1.37962	5.89677
KAZN	0.0314859	?	0.234528	-4.26388	1.03087	4.3955
CDH12	0.0358955	?	0.235426	-4.24762	0.364011	1.54618
NDRG3	0.0103638	?	0.235595	-4.24458	0.917699	3.89524
ST6GAL2	0.00273455	0.173347	0.236776	-4.2234	3.96304	16.7375
COL8A1	0.00429567	0.214338	0.237878	-4.20383	1.52562	6.41345
CEP85	0.0451923	?	0.238277	-4.19679	0.907165	3.80718
PREPL	0.0472013	?	0.238479	-4.19323	0.431207	1.80815
PHLDB2	0.00507969	0.230828	0.239484	-4.17565	2.39873	10.0163
SAMD9	0.0266015	0.522574	0.239541	-4.17465	5.42741	22.6575
RHOXF1-AS1	0.036272	?	0.239811	-4.16996	0.998482	4.16363
MEMO1	0.00895239	?	0.240219	-4.16287	0.777265	3.23566
MEIS2	0.02418	0.499673	0.24132	-4.14387	0.492343	2.04021
PDE10A	0.00126287	0.118397	0.241586	-4.13931	1.47558	6.10788
NDRG3	0.000679686	0.0901118	0.242455	-4.12448	1.46089	6.02542
PTHLH	0.0163294	0.403568	0.243572	-4.10557	3.52089	14.4553
MIAT	0.00964057	0.317426	0.244325	-4.09291	0.370782	1.51757
TTC17	0.0259722	0.517877	0.244541	-4.0893	1.68601	6.8946
ENTPD3	0.042205	0.650064	0.245524	-4.07292	4.73358	19.2795
MYCL	0.0200868	0.451386	0.246066	-4.06395	2.46278	10.0086
UPK3A	0.0397449	0.632121	0.247424	-4.04164	7.18557	29.0415
EDNRA	0.0427675	0.656739	0.247592	-4.0389	1.65316	6.67694
CCDC74B	0.0285846	?	0.250983	-3.98433	0.415464	1.65534
CSRNP3	0.012809	0.362053	0.251411	-3.97755	2.10683	8.38004
ZBTB21	0.0476143	?	0.253087	-3.95121	1.11547	4.40748
INHBA	8.79006e-06	0.00711715	0.254023	-3.93666	12.5548	49.4238
PRSS2	0.0353921	0.599277	0.25469	-3.92634	8.13569	31.9435
ZNF704	0.00453842	0.22028	0.255865	-3.90831	2.67616	10.4593
MGAT5B	0.00849239	0.298239	0.257052	-3.89027	0.434128	1.68887
PLN	0.0281927	?	0.258097	-3.87451	0.973366	3.77132
ZC4H2	0.000540854	0.0803675	0.259712	-3.85041	2.1633	8.3296
GPR137C	0.0312262	0.567585	0.260285	-3.84194	0.719409	2.76393
NCAM2	0.0189169	?	0.261189	-3.82864	0.365272	1.39849
MARCHF4	0.0244519	?	0.261687	-3.82135	0.863587	3.30007
MSANTD3-TMEFF1	0.019703	?	0.261929	-3.81783	0.930232	3.55147
REEP2	0.00490138	0.229644	0.262692	-3.80674	1.72307	6.55927
CNTNAP3	0.00392713	0.209066	0.263416	-3.79628	1.88628	7.16083
RCBTB2	0.0238831	0.495839	0.263589	-3.79379	1.29199	4.90155
EVA1A	0.00415475	0.212059	0.264364	-3.78267	3.69573	13.9797
SGCE	0.031138	?	0.264481	-3.78099	0.707704	2.67582
LAMP5	0.0318072	0.571589	0.264799	-3.77645	0.814756	3.07689
IGFBP7	2.44397e-07	0.000544182	0.267317	-3.74088	44.1091	165.007
AADAT	0.031087	?	0.267668	-3.73597	0.932152	3.48249
PKM	0.000198592	0.0465767	0.268252	-3.72784	7.30802	27.2431
ARIH2	0.0262721	?	0.269855	-3.7057	1.52386	5.64696
KLRK1-AS1	0.0060569	0.250911	0.270615	-3.69529	5.23912	19.3601
NAT10	0.0111753	0.339347	0.270967	-3.69048	2.64571	9.76395
UBXN1	0.0426473	?	0.271408	-3.68449	1.03279	3.80532
ASIC2	0.034396	0.58913	0.272228	-3.67339	1.71635	6.30483
STMN3	0.00505034	0.230557	0.272365	-3.67155	1.96931	7.23043
POU3F1	0.0330097	0.5782	0.27283	-3.66529	0.707844	2.59445
ZFP64	0.0445909	?	0.274237	-3.64648	0.405742	1.47953
FRMD6	0.00206245	0.150843	0.276671	-3.6144	10.4401	37.7349
CNOT6	0.0416247	?	0.276681	-3.61427	0.853449	3.08459
KIF17	0.0429094	?	0.27741	-3.60478	0.525952	1.89594
SYNC	0.0429373	?	0.279024	-3.58392	1.19464	4.2815
SERTAD4	0.00444972	0.217508	0.279669	-3.57566	1.04055	3.72067
TRIM29	0.012256	0.353263	0.279898	-3.57273	17.6586	63.0893
ACTG2	0.0306342	0.563145	0.280721	-3.56226	58.2556	207.522
NNAT	8.45484e-06	0.00711715	0.281822	-3.54833	20.6146	73.1474
PCDH10	0.000671668	0.089958	0.281998	-3.54612	13.2635	47.0339
ISLR2	0.0182364	0.427991	0.282438	-3.54059	0.258593	0.915574
ALDH1A3	0.0194437	0.442903	0.282893	-3.53491	1.38197	4.88513
PCBP4	0.0226452	0.480785	0.283369	-3.52897	1.12604	3.97376
RBM26	0.0162842	0.403568	0.28349	-3.52746	3.8169	13.464
NLRP2	0.0317089	?	0.284879	-3.51026	1.34511	4.7217
CPA4	0.0164594	0.405007	0.285183	-3.50652	6.9836	24.4881
ZNF503	0.00904346	0.308316	0.286267	-3.49324	1.5782	5.51302
JCAD	0.00918551	?	0.28673	-3.48761	1.1069	3.86044
PCDHGB6	0.000668028	0.089958	0.286862	-3.486	3.39182	11.8239
ATP5F1C	0.0333889	?	0.287109	-3.483	0.646379	2.25134
ANOS1	4.05134e-05	0.0185042	0.288629	-3.46465	16.0373	55.5636
PCDH10	1.32762e-05	0.00909576	0.288725	-3.4635	13.2037	45.7309
EPHB6	0.00228365	0.156456	0.288911	-3.46127	4.11297	14.2361
ARHGAP19	0.0211937	?	0.289057	-3.45952	1.09603	3.79174
RBMS3	0.0352015	0.597457	0.290443	-3.44301	1.90979	6.57544
ST6GAL2	0.0363262	?	0.290665	-3.44038	2.17978	7.49928
LIMCH1	0.0297034	0.555785	0.292438	-3.41953	3.83895	13.1274
TOX2	0.00221773	0.156144	0.29307	-3.41216	2.86133	9.76331
SP110	0.0319266	?	0.293567	-3.40638	1.77495	6.04615
ISG15	0.0139545	0.372615	0.294745	-3.39277	9.25603	31.4036
ADCY2	0.00461512	0.223394	0.295137	-3.38825	0.86536	2.93206
THAP9-AS1	0.0346316	?	0.295856	-3.38002	0.935596	3.16233
SDAD1	0.0247128	?	0.296353	-3.37435	1.69837	5.73089
EXOC6B	0.0145366	?	0.297168	-3.3651	2.68028	9.01941
TNFAIP2	0.000370402	0.0677167	0.297301	-3.3636	5.86769	19.7366
SGCD	0.0431037	0.657433	0.297502	-3.36132	2.18919	7.35857
SULF1	0.0319008	0.571589	0.298337	-3.35192	2.20986	7.40726
NT5E	0.0394744	0.631224	0.3002	-3.33111	5.94949	19.8184
SBK1	0.000399673	0.070635	0.30236	-3.30731	35.6268	117.829
SASH1	0.00350864	0.195923	0.303245	-3.29767	6.44892	21.2664
SYT1	0.00245681	0.164523	0.304928	-3.27947	1.98877	6.52212
IFIT1	0.0157711	0.395119	0.304991	-3.27879	3.52361	11.5532
PSPC1	0.0397834	?	0.305086	-3.27776	1.19513	3.91735
CNTNAP3B	0.00979813	0.318168	0.305964	-3.26836	3.55609	11.6226
ADAM19	4.19494e-05	0.0185796	0.306556	-3.26204	63.6744	207.709
MYADM	0.0122433	0.353263	0.308138	-3.2453	2.76261	8.96552
EGR2	0.044909	?	0.309259	-3.23354	1.4679	4.7465
WASF1	0.0338427	?	0.30929	-3.23321	0.847311	2.73954
PODXL	0.039533	0.631224	0.309627	-3.22969	6.17495	19.9432
WDR48	0.0289368	0.548353	0.312539	-3.1996	1.58462	5.07014
SYT11	0.00142812	0.127195	0.312642	-3.19855	4.01601	12.8454
DCHS2	0.0141428	0.37601	0.313161	-3.19324	1.31898	4.21184
FJX1	0.000503471	0.0783397	0.313679	-3.18798	17.9447	57.2071
ZFP90	0.0198389	0.448018	0.313718	-3.18757	1.98824	6.33765
SCMH1	0.0273325	?	0.31416	-3.18309	1.79155	5.70266
ADCY1	0.000737403	0.0912178	0.314658	-3.17805	5.1419	16.3412
ACTA2	0.0243269	0.500638	0.316606	-3.1585	138.807	438.421
TAGLN	0.000513859	0.0783397	0.318622	-3.13852	132.898	417.103
RAB6A	0.00558695	0.243326	0.319492	-3.12997	4.89871	15.3328
ZEB1	0.0420635	0.649288	0.319917	-3.12581	1.51751	4.74345
SULF1	0.00577151	0.247412	0.3201	-3.12402	5.55219	17.3452
CELF1	0.0249929	?	0.320148	-3.12355	1.24596	3.89183
SFSWAP	0.0405499	?	0.320192	-3.12312	1.39148	4.34576
CNN1	0.00400017	0.211439	0.321134	-3.11397	15.9531	49.6776
PLPPR3	0.000138267	0.0402703	0.32133	-3.11206	13.6806	42.5749
RFWD3	0.0406992	?	0.321672	-3.10876	1.65718	5.15176
ARHGDIB	0.0102595	0.325184	0.323344	-3.09268	10.4555	32.3356
CYRIA	0.00501241	0.230557	0.323702	-3.08926	3.16782	9.78622
SULF1	0.00437555	0.216505	0.324284	-3.08371	15.6381	48.2233
GGA3	0.046945	0.682637	0.324985	-3.07706	2.62911	8.08993
ST8SIA4	0.0138801	0.372359	0.326399	-3.06373	5.62455	17.2321
RAE1	0.0105422	0.330032	0.327731	-3.05128	2.81516	8.58985
TUBB3	0.00190222	0.146387	0.327767	-3.05094	90.1767	275.124
TCEAL7	0.0131817	0.36404	0.328938	-3.04008	1.50355	4.57092
VGLL3	0.0104332	0.328349	0.32901	-3.03942	8.40862	25.5573
TAF1C	0.0237579	0.493816	0.329067	-3.03889	1.37561	4.18033
DOCK11	0.036283	0.605159	0.332031	-3.01177	9.28578	27.9666
PLS3	0.00506078	0.230557	0.333152	-3.00163	7.89696	23.7038
CHODL	0.00302028	0.181757	0.333819	-2.99563	14.001	41.9419
MRTFA	0.0466936	?	0.334054	-2.99353	1.92746	5.76992
PLXDC1	0.000350319	0.0650024	0.334515	-2.9894	5.8787	17.5738
AIF1L	0.0149717	0.383623	0.334818	-2.9867	7.27164	21.7182
ITPRIP	0.0304024	0.561782	0.335224	-2.98308	2.37794	7.0936
TRIM46	0.0458786	0.676623	0.336032	-2.9759	1.81911	5.4135
SMAD1	0.0239461	0.496569	0.336451	-2.9722	3.40116	10.1089
GAS1	0.00588483	0.247817	0.336624	-2.97067	33.1768	98.5574
TFAP2A	0.00783851	0.286709	0.337898	-2.95947	1.44656	4.28105
HSPA2	4.27644e-05	0.0185796	0.340009	-2.9411	20.9057	61.4858
CTTNBP2	0.0354424	0.599283	0.341518	-2.9281	2.4708	7.23476
MYADM	0.0288189	?	0.341534	-2.92797	1.65082	4.83355
MYADM	0.0441641	?	0.34157	-2.92766	1.32337	3.87439
MYADM	0.00795229	0.28909	0.341665	-2.92684	2.88304	8.43821
CADM4	0.000656538	0.089958	0.341745	-2.92616	12.143	35.5323
PCDHGB6	0.0222033	?	0.341794	-2.92574	1.69168	4.94943
SENP7	0.0397389	0.632121	0.342695	-2.91805	1.64719	4.80658
GPC2	0.003534	0.19611	0.342784	-2.91729	2.18685	6.37968
CCBE1	0.0168562	0.41056	0.342924	-2.9161	2.73113	7.96425
ZKSCAN1	0.0290386	?	0.343118	-2.91445	2.17555	6.34052
MANBAL	0.0223281	0.478617	0.343951	-2.90739	5.31877	15.4637
SEMA3F	0.0430276	0.657433	0.344193	-2.90534	2.30299	6.69098
LY6E	0.000112395	0.0370758	0.344515	-2.90263	46.4816	134.919
CLDND1	0.00816668	0.293293	0.344905	-2.89935	4.37794	12.6932
SNCG	0.0311075	0.566769	0.346863	-2.88299	10.7025	30.855
SEMA3D	0.0166079	0.406928	0.347037	-2.88154	27.9887	80.6505
DACT2	0.0109593	0.336004	0.348095	-2.87278	5.77213	16.5821
TBX18	0.00788797	0.287338	0.349461	-2.86155	1.03377	2.95817
BRINP1	0.0311332	0.566769	0.350591	-2.85233	2.79443	7.97063
AGAP3	0.0420263	0.649288	0.351422	-2.84558	7.6553	21.7838
UHRF1	0.0466758	0.681504	0.351745	-2.84297	2.68994	7.64742
ARHGAP24	0.00863488	0.300416	0.352472	-2.83711	2.2116	6.27456
MYADM	0.0204025	0.453154	0.354626	-2.81987	2.46935	6.96327
SULT1E1	0.0444775	0.663806	0.354766	-2.81876	5.20688	14.677
CDCA8	0.0321366	0.573476	0.356662	-2.80377	1.27253	3.56788
LY6E	1.45339e-05	0.00910301	0.356717	-2.80335	254.305	712.906
CYYR1	0.00240729	0.161816	0.356732	-2.80322	4.77278	13.3792
TPM1	0.000996682	0.103057	0.356885	-2.80202	12.9847	36.3833
ANLN	0.0184223	0.429524	0.359514	-2.78154	1.84199	5.12357
ISG20L2	0.00397414	0.210689	0.35958	-2.78102	3.93038	10.9305
RGS4	0.0494917	0.702182	0.359974	-2.77797	3.09414	8.59545
NKIRAS2	0.0316763	0.571589	0.360598	-2.77317	2.8261	7.83724
TRIM22	0.00305607	0.182174	0.3608	-2.77162	8.43966	23.3915
FN1	0.00227057	0.156161	0.362638	-2.75757	28.4701	78.5083
NKAIN1	0.011807	0.347059	0.362852	-2.75594	1.56689	4.31826
TTYH1	0.0179198	0.42223	0.363512	-2.75094	6.24386	17.1765
MOXD1	0.000441063	0.0741303	0.363942	-2.74769	28.9155	79.4508
ARMH4	0.0268538	0.524215	0.364243	-2.74542	2.08568	5.72607
IL17RD	0.00938202	0.312962	0.364556	-2.74307	12.6025	34.5696
POSTN	0.00820497	0.293484	0.364609	-2.74266	3.91697	10.7429
FABP5	0.00501759	0.230557	0.36807	-2.71687	10.8543	29.4897
FKBP1A	0.00607178	0.250944	0.368708	-2.71217	6.60063	17.902
APLP1	0.00107284	0.106762	0.368777	-2.71167	9.07568	24.6102
NOVA2	0.0167437	0.409131	0.368867	-2.711	2.60717	7.06804
CHST6	0.00877729	0.303004	0.368962	-2.71031	2.55379	6.92154
PWWP3B	0.0434544	?	0.369131	-2.70907	1.76739	4.78799
PBX3	0.0437159	0.657553	0.369479	-2.70651	2.57641	6.97307
C1orf198	0.0407781	0.638459	0.370784	-2.69699	2.65176	7.15176
DNMT3A	0.00142759	0.127195	0.371139	-2.69441	5.97632	16.1026
TOM1L2	0.0430721	?	0.371186	-2.69407	2.86789	7.72627
CRMP1	0.00126122	0.118397	0.374836	-2.66783	28.8949	77.0868
NARF	0.028151	0.539986	0.375146	-2.66563	1.27727	3.40473
LTBP2	0.0070698	0.272768	0.375173	-2.66544	56.2556	149.946
OLFML2A	0.00927071	0.312172	0.375216	-2.66513	13.5824	36.1989
CLCN5	0.0175623	0.418791	0.375326	-2.66435	7.29464	19.4355
CCDC3	0.0019358	0.146499	0.377146	-2.65149	99.3413	263.403
PCDHB10	0.010958	0.336004	0.378096	-2.64483	2.18965	5.79125
BEGAIN	0.00562179	0.244246	0.378201	-2.6441	4.50173	11.903
INA	0.00432862	0.215313	0.379152	-2.63747	7.38804	19.4857
JCAD	0.0137284	0.371982	0.37939	-2.63581	2.55087	6.72362
SFRP1	0.00165675	0.139848	0.379714	-2.63356	120.904	318.407
EPHB2	0.000178159	0.044077	0.380019	-2.63145	18.0186	47.415
SEMA3F	0.00663781	0.261014	0.380023	-2.63142	49.3328	129.815
MSRB3	0.0272381	0.529323	0.380405	-2.62878	8.36654	21.9938
FBN2	0.000181481	0.0442839	0.380829	-2.62585	89.9857	236.289
RFTN2	0.0203177	0.453154	0.380926	-2.62518	3.42849	9.00041
HDGFL2	0.00115454	0.112381	0.381085	-2.62409	8.03402	21.082
DPYSL4	0.000132768	0.0394167	0.381787	-2.61926	21.1089	55.2897
LYPD3	0.0303792	0.561782	0.382818	-2.61221	7.05077	18.4181
SHANK1	0.0175905	0.418903	0.38329	-2.60899	7.46386	19.4731
KATNAL1	0.0103205	0.32538	0.384221	-2.60267	2.03836	5.30517
SEPTIN6	0.0263785	0.51978	0.385778	-2.59217	1.39041	3.60417
COL12A1	0.000495028	0.0783397	0.386033	-2.59045	31.6175	81.9035
GLIPR1	0.00318521	0.186469	0.386707	-2.58594	26.3064	68.0266
PIANP	0.00213413	0.152676	0.387097	-2.58333	15.5784	40.2443
CBFA2T3	0.0287186	0.546545	0.387111	-2.58324	3.89961	10.0736
TEAD2	0.016484	0.405007	0.387944	-2.57769	4.61667	11.9003
MAFB	0.0162642	0.403568	0.388489	-2.57407	19.4969	50.1865
FN1	0.0131757	0.36404	0.390199	-2.5628	12.6514	32.423
DDHD2	0.0369063	0.61041	0.391127	-2.55672	2.42293	6.19474
TRAPPC5	0.0463372	0.680465	0.391376	-2.55509	2.91238	7.44138
MCAM	0.021858	0.471402	0.391619	-2.5535	7.72628	19.7291
CTNS	0.0474331	?	0.391695	-2.55301	2.38797	6.09649
RBM38	0.0280284	0.539169	0.391907	-2.55162	1.33406	3.40403
ST6GAL2	0.00872584	0.3024	0.392829	-2.54563	14.0633	35.8001
RHOJ	0.0196006	0.445339	0.393108	-2.54383	12.7273	32.376
NREP	0.014906	0.383623	0.393432	-2.54174	2.78545	7.07987
KATNBL1	0.00477873	0.226914	0.39534	-2.52947	4.74905	12.0126
TUBA1A	0.000120555	0.0376746	0.39902	-2.50614	260.725	653.413
IGLON5	0.00219645	0.156144	0.399104	-2.50561	43.5045	109.005
SLC7A5	0.0130579	0.364006	0.399253	-2.50468	275.932	691.12
SHF	0.00630482	0.254473	0.399392	-2.50381	3.83152	9.59338
CCDC80	0.0149441	0.383623	0.399476	-2.50328	19.7304	49.3907
KIF3C	0.000606777	0.0851064	0.399821	-2.50112	22.9519	57.4054
UBE2H	0.0357075	0.601157	0.400019	-2.49988	2.8036	7.00868
BGN	0.00529784	0.235926	0.400028	-2.49983	696.517	1741.17
PROM2	0.0422232	0.650064	0.400465	-2.4971	29.7421	74.2689
GSK3B	0.0156085	0.393354	0.400593	-2.4963	5.53434	13.8153
SPOCK1	0.0118768	0.347169	0.40174	-2.48917	71.472	177.906
RASL11B	0.0261075	0.517877	0.402076	-2.48709	2.14146	5.32601
CNTRL	0.0224127	0.478895	0.402203	-2.48631	4.17698	10.3853
BACH2	0.0190445	0.437729	0.406399	-2.46064	2.07345	5.102
NRK	0.0260279	0.517877	0.406775	-2.45836	26.6317	65.4703
TPM2	0.0135515	0.369329	0.40775	-2.45248	7.32374	17.9613
C1orf198	0.0493547	0.702182	0.409144	-2.44413	3.24706	7.93622
HSD17B14	0.0211236	0.461687	0.410669	-2.43505	4.23196	10.305
GBP1	0.0120212	0.349364	0.411239	-2.43168	10.9873	26.7175
CDKN2A	0.0414815	0.64618	0.412185	-2.4261	29.7859	72.2634
TNC	0.00118186	0.113279	0.412486	-2.42433	197.332	478.398
MMP11	0.00226428	0.156161	0.412891	-2.42195	21.1297	51.1751
TRAF5	0.0313547	0.56876	0.413424	-2.41882	3.69421	8.93564
TUBB2B	0.00378654	0.203299	0.413824	-2.41649	25.2569	61.0329
LRP12	0.0330112	0.5782	0.41527	-2.40807	4.48741	10.806
SPNS1	0.00989124	0.31919	0.416244	-2.40244	11.1318	26.7435
SEPTIN5	0.00339646	0.193792	0.416429	-2.40137	16.9284	40.6512
LMNA	0.0410885	0.642025	0.417292	-2.3964	3.42414	8.20563
WDR47	0.0229825	0.486208	0.417541	-2.39497	3.7493	8.97947
RAB15	0.0463869	0.680634	0.418229	-2.39103	5.0323	12.0324
TUBB	0.00207466	0.150843	0.419052	-2.38634	16.4325	39.2136
THBS2	0.00936628	0.312962	0.419535	-2.38359	24.5923	58.618
FST	0.0125146	0.357821	0.419616	-2.38313	3.41386	8.13566
GATA2	0.03196	0.571589	0.42093	-2.37569	16.8401	40.007
DNMT3A	0.0440383	0.660313	0.422021	-2.36955	3.7123	8.79648
GREM1	0.0278851	0.538738	0.422075	-2.36925	16.8954	40.0294
SEPTIN2	0.00886992	0.303846	0.422102	-2.36909	7.97341	18.8898
MYADM	0.00407853	0.211766	0.422111	-2.36904	7.57596	17.9478
FHL1	0.0160412	0.400199	0.422357	-2.36767	18.6358	44.1234
SESN3	0.0161925	0.402846	0.424619	-2.35505	12.1231	28.5506
CCDC144NL-AS1	0.0256339	0.514788	0.425619	-2.34952	3.12096	7.33275
CRABP2	0.00300872	0.181757	0.426095	-2.3469	102.562	240.703
FN1	0.0102271	0.325184	0.428723	-2.33251	350.211	816.871
MYL9	0.0049717	0.230557	0.43002	-2.32547	232.183	539.935
MEX3A	2.92492e-05	0.0144727	0.430316	-2.32387	76.3176	177.352
MEX3B	0.00632206	0.254473	0.430371	-2.32358	21.7176	50.4627
ARHGDIB	0.0395375	0.631224	0.430929	-2.32057	7.63953	17.7281
DUSP4	0.0155731	0.393354	0.431804	-2.31587	41.8888	97.0089
OLFML2B	0.0143381	0.37837	0.433172	-2.30855	10.7425	24.7996
TPBG	0.00693743	0.270408	0.433865	-2.30486	28.5772	65.8665
GATA3	0.0254965	0.512606	0.434037	-2.30395	77.6878	178.989
RBFOX2	0.0121455	0.351785	0.434871	-2.29953	11.1877	25.7265
APLP1	0.0142091	0.377208	0.435476	-2.29634	17.9648	41.2532
GPC1	0.00595627	0.249588	0.435958	-2.2938	191.244	438.675
TPM2	0.00251884	0.166178	0.436556	-2.29066	63.0933	144.525
HOXD11	0.0267048	0.52274	0.437204	-2.28726	28.6136	65.4467
PLEKHO1	0.00775723	0.285495	0.438073	-2.28272	22.1168	50.4864
STMN1	0.00286809	0.177611	0.43847	-2.28066	47.2766	107.822
DCBLD2	0.00189501	0.146387	0.439295	-2.27637	46.5305	105.921
LIMCH1	0.0354934	0.599283	0.439477	-2.27543	6.82679	15.5339
DENND2B	0.0173918	0.416874	0.440343	-2.27096	8.81403	20.0163
IFT52	0.0244519	0.501007	0.440582	-2.26973	3.98651	9.04828
FZD1	0.00301633	0.181757	0.441622	-2.26438	63.2143	143.141
FN1	0.010495	0.329132	0.443083	-2.25692	576.804	1301.8
PGAP1	0.014419	0.379389	0.443835	-2.25309	7.44958	16.7846
PBX3	0.0384822	0.624967	0.443836	-2.25309	10.7837	24.2966
GLIPR2	0.0205051	0.454301	0.444138	-2.25155	12.4076	27.9364
COL12A1	0.00521072	0.234316	0.444277	-2.25085	25.0354	56.3509
HLX	0.0274342	0.532338	0.4448	-2.2482	30.7248	69.0755
GAL3ST4	0.00518894	0.234316	0.446345	-2.24042	8.62926	19.3332
UBE2E3	0.0322749	0.573765	0.446461	-2.23984	2.84086	6.36306
ZNF532	0.0334663	0.581595	0.44667	-2.23879	6.09775	13.6516
TMCC2	0.0458251	0.676623	0.446703	-2.23863	3.3935	7.59678
PLEKHG4B	0.0311495	0.566769	0.446722	-2.23853	6.21398	13.9102
SDC1	0.0157375	0.395119	0.446781	-2.23823	109.394	244.85
RAMP2	0.0383964	0.624967	0.447324	-2.23552	14.3534	32.0873
ARL4D	0.0444949	0.663806	0.447976	-2.23226	4.44846	9.93014
HTRA1	0.0245849	0.502308	0.448321	-2.23054	14.2345	31.7507
HMCN1	0.0347574	0.593041	0.448337	-2.23046	25.04	55.8509
TUBB	0.0020747	0.150843	0.448794	-2.22819	73.2636	163.246
DTX3	0.00839542	0.297806	0.448826	-2.22804	8.57269	19.1003
ADAMTS5	0.00770129	0.284805	0.44959	-2.22425	10.4524	23.2487
DPYSL3	0.00617719	0.252952	0.450754	-2.21851	41.6063	92.3039
CAP2	0.038989	0.628306	0.452141	-2.2117	6.55995	14.5086
NKIRAS2	0.0148585	0.383623	0.453528	-2.20494	10.1136	22.2999
NNAT	0.00344223	0.194555	0.454816	-2.19869	28.3221	62.2714
MCM5	0.0155415	0.393354	0.454987	-2.19787	15.6256	34.3431
BUB1	0.0415451	0.64618	0.455075	-2.19744	5.30388	11.655
TAF6	0.00976172	0.318168	0.456056	-2.19271	9.38662	20.5821
CRIP2	0.0315962	0.571589	0.456394	-2.19109	14.5244	31.8243
COL6A3	0.00308955	0.183447	0.456695	-2.18965	244.53	535.435
DKK2	0.0118887	0.347169	0.458256	-2.18218	5.30879	11.5848
RND3	0.0227045	0.480898	0.461484	-2.16692	21.0233	45.5559
FOXC1	0.0308161	0.564741	0.461673	-2.16603	17.5864	38.0927
MCC	0.0196304	0.445447	0.461709	-2.16587	10.0716	21.8137
MEIS3	0.00853881	0.298239	0.462082	-2.16412	20.518	44.4033
TBC1D14	0.0193755	0.442482	0.46262	-2.1616	13.2448	28.6299
NCS1	0.0116099	0.343162	0.462636	-2.16152	13.9005	30.0463
LPAR1	0.0114276	0.34097	0.463383	-2.15804	10.1309	21.8629
COL6A3	0.00349792	0.195923	0.463927	-2.15551	639.483	1378.41
PARD6G	0.00499146	0.230557	0.464448	-2.15309	14.0384	30.226
TUBB	0.0362026	0.604683	0.465971	-2.14606	6.13328	13.1624
MEIS3	0.0458856	0.676623	0.466438	-2.14391	3.28928	7.05193
NECTIN1	0.0177762	0.419956	0.466639	-2.14298	99.1684	212.516
ARHGAP31	0.0162977	0.403568	0.46803	-2.13662	29.4223	62.8642
ATP2B4	0.012941	0.362961	0.468108	-2.13626	8.23443	17.5909
NUAK1	0.0172026	0.415504	0.468251	-2.13561	17.7776	37.9659
TJP1	0.0233552	0.48847	0.469374	-2.1305	7.73873	16.4873
EPHA3	0.0275037	0.533104	0.469626	-2.12935	14.7163	31.3362
TGFB2	0.0186535	0.430966	0.471249	-2.12202	7.51729	15.9519
NLGN4Y	0.0381277	0.62252	0.471722	-2.11989	13.4506	28.5139
COL9A2	0.0465669	0.681031	0.472459	-2.11658	21.4204	45.3381
TAF9B	0.0268685	0.524215	0.473202	-2.11326	7.86478	16.6203
FOXC2	0.0336649	0.583219	0.473392	-2.11242	23.5123	49.6678
AKAP12	0.0457706	0.676623	0.473953	-2.10992	8.25334	17.4139
CPT1C	0.0461049	0.678172	0.474546	-2.10728	4.50805	9.49973
CDH2	0.0455998	0.676328	0.475342	-2.10375	10.8139	22.7497
SMTN	0.033437	0.581595	0.475467	-2.1032	8.98885	18.9053
SLITRK6	0.022693	0.480898	0.475488	-2.1031	13.1058	27.5628
IGSF8	0.0204335	0.453277	0.475616	-2.10254	6.93976	14.5911
FAM89B	0.0231922	0.488012	0.475925	-2.10117	9.72934	20.443
LY6H	0.044279	0.661938	0.477266	-2.09527	24.3646	51.0504
CALD1	0.0151953	0.387231	0.47753	-2.09411	84.9178	177.827
NCS1	0.004099	0.211766	0.477687	-2.09342	35.711	74.7582
RGS12	0.0291715	0.550996	0.47891	-2.08808	7.41009	15.4728
KCNMB4	0.0200992	0.451386	0.480864	-2.07959	10.629	22.104
MRPL4	0.0338482	0.584241	0.481057	-2.07876	11.1466	23.1711
NKD1	0.0156123	0.393354	0.481129	-2.07844	4.16296	8.65249
AMOTL2	0.0277545	0.536799	0.481327	-2.07759	6.5187	13.5432
SLFN5	0.0187152	0.431831	0.481381	-2.07736	20.9613	43.5441
COL6A3	0.0401171	0.633402	0.482193	-2.07386	14.8544	30.8058
ID3	0.0116948	0.344899	0.482928	-2.0707	106.236	219.983
TPM2	0.0106164	0.331619	0.483952	-2.06632	9.84801	20.3491
SLC7A8	0.0241088	0.498781	0.483955	-2.06631	55.6488	114.988
ARHGAP29	0.0484034	0.69758	0.484466	-2.06413	8.92022	18.4125
LTBP4	0.0102778	0.325184	0.485197	-2.06102	33.5312	69.1085
TAMALIN	0.029188	0.550996	0.485859	-2.05821	7.12903	14.6731
TEAD2	0.00835098	0.296918	0.485893	-2.05807	37.8502	77.8982
MEIS3	0.0211176	0.461687	0.486183	-2.05684	12.9842	26.7064
FN1	0.00188502	0.146387	0.488096	-2.04878	248.364	508.843
OSR1	0.037546	0.615844	0.488134	-2.04862	58.9741	120.815
ZBTB8A	0.0437433	0.657553	0.488368	-2.04763	5.69801	11.6674
CTXN1	0.036346	0.605642	0.488539	-2.04692	68.739	140.703
WNK2	0.0440384	0.660313	0.489745	-2.04188	24.7141	50.4632
PSME3	0.0432546	0.657553	0.490067	-2.04054	12.4777	25.4612
E2F7	0.0330105	0.5782	0.490218	-2.03991	6.81608	13.9042
COL4A1	0.00037255	0.0677167	0.493353	-2.02694	610.135	1236.71
DKK3	0.0332191	0.580098	0.49534	-2.01881	12.7369	25.7135
CCN2	0.00815974	0.293293	0.495933	-2.0164	85.3215	172.042
MRAS	0.0106301	0.331619	0.496199	-2.01532	11.1775	22.5263
EHD3	0.00768087	0.284805	0.496382	-2.01458	20.1735	40.6411
PCYT1B	0.0442272	0.661938	0.496569	-2.01382	6.36394	12.8158
UBASH3B	0.0325495	0.576347	0.497742	-2.00907	15.9491	32.0429
FBXL7	0.0414227	0.646115	0.500014	-1.99994	26.8362	53.6709
CDC42EP3	0.00883655	0.303696	0.500384	-1.99847	55.6448	111.204
MIR100HG	0.0330439	0.578203	0.501265	-1.99495	14.0159	27.9611
KCTD15	0.0339443	0.585333	0.502107	-1.99161	11.026	21.9595
PCDHGB7	0.0366923	0.60789	0.502338	-1.99069	5.63833	11.2242
NREP	0.0326139	0.576828	0.503059	-1.98784	11.8574	23.5707
HOMER3	0.00433938	0.215313	0.503158	-1.98745	22.7273	45.1693
FN1	0.00554651	0.243326	0.503669	-1.98543	411.197	816.402
CNTROB	0.0193683	0.442482	0.503932	-1.9844	11.6087	23.0363
PLXDC2	0.00601472	0.250327	0.505576	-1.97794	37.684	74.5368
MTURN	0.0371515	0.612758	0.505654	-1.97764	4.52997	8.95864
NREP	0.0399431	0.632496	0.505876	-1.97677	19.5659	38.6773
SNRPN	0.0287187	0.546545	0.506288	-1.97516	10.0089	19.7692
SH3BP2	0.00583652	0.247566	0.50646	-1.97449	22.9246	45.2644
ADAM23	0.0131703	0.36404	0.50648	-1.97441	20.2501	39.982
FLNA	0.0101177	0.322986	0.506503	-1.97432	513.025	1012.88
MLLT11	0.00557196	0.243326	0.508145	-1.96794	30.5162	60.0542
TJP1	0.028791	0.547336	0.508194	-1.96775	17.1982	33.8419
AMPD2	0.0494958	0.702182	0.508251	-1.96753	10.9677	21.5793
ADAMTS7	0.0128082	0.362053	0.50841	-1.96692	120.598	237.207
VIM	0.0024921	0.165025	0.50954	-1.96255	1220.63	2395.56
MMP16	0.0375026	0.615699	0.510142	-1.96024	21.1733	41.5046
SETBP1	0.0188975	0.43491	0.511229	-1.95607	9.68647	18.9474
FNDC4	0.0216077	0.467676	0.511595	-1.95467	11.4162	22.3149
BMF	0.0225675	0.480612	0.515062	-1.94151	9.77528	18.9788
ZNF618	0.0430341	0.657433	0.516969	-1.93435	22.7384	43.9841
ZNF503	0.00305788	0.182174	0.518096	-1.93014	84.1592	162.439
NETO2	0.0388271	0.626859	0.518924	-1.92706	21.2794	41.0068
MAP1LC3A	0.0112637	0.339494	0.518938	-1.92701	23.9492	46.1504
SNN	0.0100697	0.32261	0.520291	-1.922	15.4965	29.7844
MACROH2A2	0.0351873	0.597457	0.520426	-1.9215	30.8302	59.2403
EVI5L	0.0358981	0.602688	0.521322	-1.9182	20.6589	39.628
MYL6	0.0129593	0.362961	0.522631	-1.9134	37.3866	71.5354
DACT1	0.024217	0.499859	0.522639	-1.91337	11.6814	22.3508
MAPK11	0.0442952	0.661938	0.522758	-1.91293	4.4171	8.44961
PCDHB2	0.00158069	0.13735	0.522849	-1.9126	36.4687	69.75
CEP170	0.0208507	0.45797	0.523169	-1.91143	15.2471	29.1437
TOMM34	0.0239836	0.496766	0.52388	-1.90883	51.6926	98.6726
MRPS35	0.0184046	0.429524	0.524175	-1.90776	10.8129	20.6284
TBX2	0.0344946	0.589752	0.524371	-1.90705	70.887	135.185
SLK	0.0199586	0.449459	0.525607	-1.90256	11.7095	22.2781
PDK2	0.0132582	0.364122	0.526427	-1.8996	20.8483	39.6035
FLNA	0.00634289	0.254473	0.527001	-1.89753	464.159	880.755
CCDC80	0.0115731	0.343162	0.527895	-1.89432	253.338	479.903
PDLIM7	0.00869613	0.301957	0.527964	-1.89407	165.561	313.585
PLSCR3	0.0284825	0.543793	0.528439	-1.89237	11.6732	22.09
DBN1	0.0299992	0.558387	0.528774	-1.89117	127.108	240.383
PAFAH1B3	0.0248206	0.504553	0.52903	-1.89025	15.9382	30.1272
ATP10D	0.0202036	0.452688	0.53101	-1.8832	23.9245	45.0547
NUBP2	0.0466628	0.681504	0.531392	-1.88185	11.4661	21.5776
TCF3	0.0318948	0.571589	0.531846	-1.88024	27.7369	52.152
TCF3	0.0122807	0.353401	0.532175	-1.87908	36.8829	69.3059
FAM89B	0.00611584	0.252179	0.533101	-1.87582	57.9903	108.779
DBN1	0.00212483	0.152676	0.533361	-1.8749	223.374	418.805
DNAJB5	0.0417595	0.6474	0.533994	-1.87268	7.38949	13.8382
CNN2	0.0203715	0.453154	0.535242	-1.86831	22.0022	41.107
ZNF71	0.0293623	0.552302	0.535766	-1.86649	7.93674	14.8138
PRKX	0.0418059	0.647556	0.536708	-1.86321	9.55567	17.8042
SSC5D	0.0361138	0.6046	0.537902	-1.85907	42.9137	79.7797
SAMD14	0.041663	0.647029	0.538631	-1.85656	23.205	43.0815
CCDC130	0.0433108	0.657553	0.538669	-1.85643	6.093	11.3112
FAM210B	0.0137196	0.371982	0.539517	-1.85351	50.2943	93.221
NRBP1	0.0343089	0.58913	0.539567	-1.85334	48.6476	90.1606
CACNB3	0.00633242	0.254473	0.539992	-1.85188	17.459	32.3319
CNN2	0.00909931	0.308567	0.540254	-1.85098	35.0404	64.8591
CCN4	0.0163921	0.404421	0.540836	-1.84899	25.1499	46.5019
MRTFA	0.0361578	0.604683	0.54088	-1.84884	18.2158	33.6781
MN1	0.0128465	0.362053	0.541203	-1.84773	53.6953	99.2147
PPP1R18	0.00408724	0.211766	0.541569	-1.84649	46.2095	85.3252
TANC2	0.00464951	0.224449	0.544258	-1.83736	37.131	68.2232
TBC1D9	0.0226371	0.480785	0.545172	-1.83428	25.3045	46.4156
VANGL2	0.0262023	0.518318	0.545864	-1.83196	35.1216	64.3413
PDLIM7	0.0149039	0.383623	0.546826	-1.82873	24.824	45.3966
GPRC5B	0.0451442	0.670686	0.546926	-1.8284	13.4923	24.6693
GPRC5B	0.0139402	0.372615	0.548227	-1.82406	17.8865	32.6261
TUSC3	0.0436492	0.657553	0.548716	-1.82244	24.8702	45.3243
EVL	0.00698543	0.271685	0.549499	-1.81984	11.1518	20.2945
ZNF561	0.0232867	0.48847	0.550527	-1.81644	15.0464	27.3308
EVL	0.0165257	0.405472	0.550781	-1.81561	46.397	84.2386
ARL3	0.0329784	0.5782	0.553023	-1.80824	11.3989	20.612
PRAG1	0.0157575	0.395119	0.553384	-1.80706	96.3905	174.184
FBLN5	0.0358863	0.602688	0.554117	-1.80467	91.3721	164.897
MICALL1	0.0337745	0.584102	0.554316	-1.80402	92.1309	166.206
IGFBP5	0.0344985	0.589752	0.554644	-1.80296	1643.41	2962.99
MXRA5	0.0234185	0.48847	0.556651	-1.79646	148.39	266.577
OLFM2	0.026138	0.517904	0.55722	-1.79462	22.8386	40.9868
B4GALNT4	0.0243398	0.500638	0.557377	-1.79412	78.9844	141.707
CLEC11A	0.0233592	0.48847	0.557571	-1.79349	36.2671	65.0448
MFAP2	0.012569	0.358802	0.558046	-1.79197	37.5375	67.2659
ELK3	0.00687128	0.268417	0.55822	-1.79141	69.3772	124.283
LIMD2	0.0328906	0.5782	0.558779	-1.78962	34.4258	61.6089
EXTL3	0.00797042	0.289159	0.559012	-1.78887	57.403	102.687
GPC4	0.0338166	0.584241	0.55946	-1.78744	37.1881	66.4714
FN1	0.0407465	0.638459	0.563169	-1.77567	60.8466	108.043
RGS12	0.0110827	0.338286	0.563892	-1.77339	18.1292	32.1502
ZNF697	0.0263323	0.519444	0.564052	-1.77288	16.0758	28.5006
ZSCAN18	0.0258589	0.517556	0.564757	-1.77067	18.1889	32.2066
STIM1	0.0307339	0.564396	0.566497	-1.76523	8.32193	14.6901
TNPO2	0.0137849	0.372046	0.567723	-1.76142	30.7901	54.2344
COL4A2	0.00104398	0.105064	0.56799	-1.76059	1078.96	1899.61
EPN2	0.0446229	0.664606	0.568585	-1.75875	20.3132	35.7259
ZYX	0.00617535	0.252952	0.57086	-1.75174	197.452	345.884
COTL1	0.0198694	0.448018	0.57218	-1.7477	181.146	316.589
TPM4	0.00950103	0.313992	0.572709	-1.74609	32.6098	56.9395
SPATS2	0.0341558	0.587366	0.575733	-1.73692	15.3538	26.6682
MFAP2	0.0120227	0.349364	0.577135	-1.7327	348.292	603.485
LIMA1	0.0202778	0.453154	0.577835	-1.7306	39.8143	68.9026
SLC38A2	0.0110907	0.338286	0.578643	-1.72818	85.5474	147.841
PEA15	0.0318006	0.571589	0.581062	-1.72099	140.099	241.109
NOTCH3	0.0107776	0.332832	0.58237	-1.71712	381.38	654.876
TGFB1I1	0.0486745	0.700205	0.582948	-1.71542	41.4695	71.1377
PHLDA1	0.0108894	0.335594	0.583706	-1.71319	104.429	178.907
LOXL1	0.0372892	0.614462	0.58395	-1.71248	105.793	181.168
KDM1A	0.00719052	0.273685	0.584695	-1.71029	45.2386	77.3713
CAVIN1	0.0266821	0.52274	0.584985	-1.70944	171.716	293.539
NUMBL	0.0258297	0.517553	0.585954	-1.70662	58.3781	99.6291
NEDD4L	0.0498926	0.703277	0.587235	-1.70289	8.34472	14.2102
RBFOX2	0.0490079	0.702182	0.587571	-1.70192	14.7108	25.0366
GTF2IP4	0.00980693	0.318168	0.588033	-1.70059	36.6987	62.4093
GTF2IP1	0.00909497	0.308567	0.588035	-1.70058	39.2641	66.7718
IGFBP4	0.0243426	0.500638	0.589501	-1.69635	279.791	474.624
SMARCA4	0.0480934	0.695363	0.592793	-1.68693	16.9225	28.5471
TMEM132A	0.0495454	0.702182	0.59335	-1.68535	65.1423	109.787
RBM38	0.039656	0.631835	0.593866	-1.68388	24.4135	41.1094
FSCN1	0.00827215	0.294704	0.596975	-1.67511	395.642	662.745
POSTN	0.0420554	0.649288	0.598251	-1.67154	129.201	215.964
CSRP1	0.0498319	0.703277	0.605908	-1.65042	109.2	180.225
PPP1R14B	0.0301691	0.559793	0.609721	-1.64009	54.0348	88.6222
RIPOR1	0.0186252	0.430872	0.613119	-1.631	52.6591	85.8871
MARCKSL1	0.0137407	0.371982	0.613123	-1.63099	330.401	538.882
THBS1	0.0311032	0.566769	0.617143	-1.62037	367.051	594.758
FBN1	0.0489254	0.702182	0.618017	-1.61808	263.557	426.457
LOXL2	0.0232321	0.488012	0.618027	-1.61805	186.538	301.829
B4GALT2	0.0210706	0.461661	0.619239	-1.61489	47.2483	76.3006
GDF11	0.0473949	0.688057	0.620212	-1.61235	49.6122	79.9924
CNN2	0.00476335	0.22687	0.623019	-1.60509	352.245	565.384
NOTCH1	0.0248317	0.504553	0.626124	-1.59713	90.0414	143.808
PRKCSH	0.0415071	0.64618	0.628911	-1.59005	24.9197	39.6235
CDK2	0.0459855	0.676997	0.632855	-1.58014	21.4532	33.899
FSTL1	0.0384881	0.624967	0.635678	-1.57312	441.149	693.981
PLK2	0.030929	0.565802	0.637777	-1.56795	59.9917	94.0638
TMEM132A	0.0490386	0.702182	0.638287	-1.56669	77.1931	120.938
ZNF579	0.0435987	0.657553	0.639673	-1.5633	56.6617	88.5793
BASP1	0.0401454	0.633402	0.643978	-1.55285	177.041	274.917
INPP5F	0.0269688	0.525597	0.645113	-1.55012	92.4675	143.335
RHOBTB3	0.0221563	0.476656	0.647998	-1.54322	125.901	194.292
MEX3D	0.0387077	0.626249	0.650938	-1.53624	78.9818	121.335
TCF3	0.0364736	0.606067	0.652918	-1.53159	79.8613	122.314
NES	0.04823	0.696774	0.653969	-1.52912	113.049	172.866
GTF2IP1	0.0431449	0.657433	0.654775	-1.52724	60.8116	92.874
APEX1	0.0429836	0.657433	0.654938	-1.52686	82.5477	126.039
MYADM	0.0436957	0.657553	0.655833	-1.52478	97.2987	148.359
MPRIP	0.0456958	0.676623	0.656285	-1.52373	121.935	185.796
TUBB	0.0422233	0.650064	0.657806	-1.52021	1166.85	1773.85
ALCAM	0.0483665	0.69758	0.659426	-1.51647	57.0568	86.5251
EPHB4	0.0386228	0.625443	0.662657	-1.50908	157.721	238.014
CAMSAP1	0.0370786	0.612465	0.662667	-1.50905	40.4274	61.0071
PTGFRN	0.0232158	0.488012	0.665183	-1.50335	59.1621	88.9411
CDK2AP1	0.0496311	0.702765	0.667094	-1.49904	94.2701	141.315
MTA2	0.0309376	0.565802	0.667581	-1.49795	67.6627	101.355
PACS2	0.034734	0.593041	0.670874	-1.49059	77.2881	115.205
TRIM24	0.0405328	0.637512	0.673975	-1.48374	88.676	131.572
CD276	0.04619	0.678864	0.675685	-1.47998	97.8843	144.867
MMP14	0.0214719	0.467007	0.680391	-1.46974	613.184	901.223
MSN	0.031298	0.56831	0.682125	-1.46601	224.023	328.419
SMARCC1	0.0350869	0.597457	0.682637	-1.46491	171.1	250.646
TPM4	0.0486987	0.700205	0.716406	-1.39586	684.439	955.379
PTTG1IP	0.0433659	0.657553	1.51489	1.51489	399.02	263.399
ALDH18A1	0.0181072	0.425519	1.53081	1.53081	174.322	113.875
PREP	0.0360805	0.6046	1.543	1.543	100.023	64.8237
ETS2	0.040773	0.638459	1.56466	1.56466	158.391	101.23
SQSTM1	0.0487604	0.700459	1.59304	1.59304	415.856	261.046
SORD	0.0322265	0.573476	1.59559	1.59559	86.7052	54.3405
SLC29A2	0.0494991	0.702182	1.5965	1.5965	69.5238	43.5477
LRP5	0.014807	0.383623	1.59835	1.59835	356.767	223.209
MICAL3	0.0447675	0.666202	1.6168	1.6168	126.693	78.3602
B2M	0.0324835	0.575749	1.6269	1.6269	603.34	370.852
CAPN5	0.0282625	0.541334	1.63371	1.63371	177.257	108.5
DNM2	0.0474806	0.688508	1.64176	1.64176	39.0032	23.757
CRAT	0.0404862	0.637512	1.64329	1.64329	38.5118	23.4359
NADSYN1	0.0383722	0.624967	1.64795	1.64795	81.6978	49.5754
CD164	0.0195919	0.445339	1.66779	1.66779	427.995	256.623
GPRC5C	0.0475033	0.688508	1.67159	1.67159	66.7468	39.9302
VEGFA	0.0320084	0.571882	1.67619	1.67619	154.167	91.9751
CERS2	0.0192052	0.439721	1.67989	1.67989	195.865	116.594
SERPINF1	0.0207311	0.456469	1.68439	1.68439	505.988	300.398
ATP9A	0.0298537	0.556842	1.68825	1.68825	104.462	61.8758
PPP1R3B	0.0366809	0.60789	1.694	1.694	63.9912	37.7751
SLC9A3-AS1	0.0493285	0.702182	1.69692	1.69692	23.0723	13.5966
PARM1	0.045802	0.676623	1.69944	1.69944	891.906	524.822
PKP2	0.0259804	0.517877	1.70354	1.70354	109.332	64.1795
SLC40A1	0.0329988	0.5782	1.70998	1.70998	119.326	69.7818
STK39	0.0292	0.550996	1.7132	1.7132	35.7306	20.856
PROS1	0.0431283	0.657433	1.71621	1.71621	53.3842	31.1058
CMTM4	0.0326806	0.576828	1.72663	1.72663	52.8905	30.6323
MAN1A1	0.0244677	0.501007	1.72827	1.72827	192.427	111.341
OSBPL7	0.0317654	0.571589	1.73286	1.73286	53.0548	30.6169
AFDN	0.0143429	0.37837	1.73322	1.73322	167.603	96.7003
JUN	0.0147854	0.383623	1.73639	1.73639	189.763	109.286
CST3	0.0470104	0.683031	1.73858	1.73858	611.822	351.908
DNM2	0.0244695	0.501007	1.73945	1.73945	111.805	64.2762
CDC42EP2	0.0185554	0.430131	1.74064	1.74064	102.931	59.134
NEU1	0.0414111	0.646115	1.74159	1.74159	135.858	78.0077
FAM160A2	0.041737	0.6474	1.74924	1.74924	55.1296	31.5163
AVL9	0.0301656	0.559793	1.77208	1.77208	50.1579	28.3046
ARHGEF18	0.00982385	0.318168	1.77297	1.77297	119.797	67.5686
HSD17B12	0.00932776	0.31291	1.77585	1.77585	84.122	47.3699
FBXO34	0.0433349	0.657553	1.77798	1.77798	36.0242	20.2613
ARID3A	0.0401301	0.633402	1.7797	1.7797	629.094	353.484
HLA-E	0.0385961	0.625443	1.78186	1.78186	251.025	140.878
PGK1	0.0364322	0.606067	1.81753	1.81753	403.03	221.746
ROCK2	0.0230688	0.487456	1.81849	1.81849	31.8807	17.5314
MAST3	0.0317923	0.571589	1.81852	1.81852	86.0313	47.3085
LGR4	0.0203941	0.453154	1.82202	1.82202	126.165	69.2447
ITPK1	0.01648	0.405007	1.82279	1.82279	92.0807	50.5163
RALGAPA2	0.0468392	0.682637	1.82411	1.82411	55.5937	30.4772
LMBRD1	0.0431894	0.65755	1.82869	1.82869	43.5104	23.7932
APP	0.0435842	0.657553	1.84487	1.84487	479.089	259.686
CYP51A1	0.0260381	0.517877	1.84698	1.84698	114.755	62.1313
GALC	0.012993	0.363335	1.85286	1.85286	67.7255	36.5519
ST14	0.0359743	0.6034	1.85588	1.85588	488.151	263.029
LRP10	0.0183646	0.429302	1.86007	1.86007	851.129	457.58
RAPH1	0.0127806	0.362053	1.86037	1.86037	76.4099	41.0724
SNTB1	0.0465622	0.681031	1.86223	1.86223	25.7248	13.814
DOK4	0.0249905	0.506704	1.87549	1.87549	48.3484	25.779
ST6GAL1	0.0455315	0.675878	1.88192	1.88192	36.3293	19.3043
SMPDL3A	0.0431339	0.657433	1.88707	1.88707	57.13	30.2745
TAPBP	0.00443755	0.217508	1.88961	1.88961	360.848	190.964
HLA-A	0.0138272	0.372359	1.89318	1.89318	57.2118	30.22
ACSS2	0.0215224	0.467079	1.89748	1.89748	142.782	75.2482
RARRES1	0.0375957	0.616092	1.90941	1.90941	64.3959	33.7256
TMEM63C	0.0217119	0.469362	1.91115	1.91115	84.3748	44.1487
FOS	0.0396222	0.631835	1.91449	1.91449	37.4902	19.5824
HOXC6	0.0341402	0.587366	1.9159	1.9159	33.8144	17.6494
RNF103	0.0362206	0.604683	1.92036	1.92036	52.207	27.1861
MARK2	0.017215	0.415504	1.92197	1.92197	57.5765	29.9571
RIOK3	0.0203295	0.453154	1.92616	1.92616	75.0423	38.9595
P4HA1	0.0426528	0.656109	1.9273	1.9273	50.2509	26.0732
MYO15B	0.0341611	0.587366	1.92878	1.92878	57.1407	29.6252
EPS8	0.00728736	0.275383	1.94206	1.94206	140.434	72.312
TGOLN2	0.0149327	0.383623	1.9423	1.9423	134.433	69.2136
GBA2	0.0335756	0.582926	1.94464	1.94464	21.2324	10.9184
NBL1	0.0153582	0.390264	1.94555	1.94555	94.2799	48.4593
PLOD2	0.00848252	0.298239	1.95323	1.95323	292.515	149.759
SERPINB6	0.0100943	0.322818	1.95661	1.95661	66.1706	33.8189
KIAA1109	0.0324532	0.575749	1.95684	1.95684	34.4112	17.5851
SCARB1	0.048332	0.69758	1.95916	1.95916	21.1013	10.7706
SLC35D2	0.0364684	0.606067	1.96918	1.96918	32.8885	16.7017
MMP15	0.0268337	0.524215	1.97435	1.97435	252.341	127.81
PTPN18	0.0213199	0.464836	1.97441	1.97441	53.0711	26.8794
TOB1	0.0330852	0.578358	1.97782	1.97782	123.102	62.241
CYSTM1	0.0317603	0.571589	1.98457	1.98457	58.1448	29.2984
ACADS	0.0393468	0.631224	1.98527	1.98527	18.6507	9.39454
TBC1D14	0.0231265	0.48777	1.98939	1.98939	27.7805	13.9644
EMP1	0.0434972	0.657553	1.9933	1.9933	177.291	88.9436
RAB11FIP5	0.0487034	0.700205	1.99857	1.99857	34.6169	17.3209
INF2	0.0318461	0.571589	2.00424	2.00424	229.799	114.657
SH3RF2	0.0458449	0.676623	2.00873	2.00873	51.1964	25.4869
CPT1A	0.041572	0.64618	2.01196	2.01196	32.504	16.1554
PLPP3	0.0299516	0.558083	2.01202	2.01202	175.33	87.1414
CARD10	0.0384596	0.624967	2.01368	2.01368	107.441	53.3554
ATP13A2	0.0156027	0.393354	2.02624	2.02624	138.157	68.1841
HPCAL1	0.0404318	0.637355	2.02653	2.02653	42.4097	20.9272
NAGA	0.0336831	0.583219	2.02723	2.02723	16.9829	8.37739
FCGRT	0.0138725	0.372359	2.02805	2.02805	148.604	73.2743
LAMA2	0.0492625	0.702182	2.03621	2.03621	76.9563	37.794
GPX3	0.0094853	0.313992	2.03678	2.03678	173.929	85.3941
IGF2	0.00199888	0.148359	2.03762	2.03762	27596.5	13543.5
HDHD3	0.0492953	0.702182	2.03784	2.03784	23.3979	11.4817
CKB	0.0478291	0.692104	2.05211	2.05211	3283.29	1599.96
PAK1	0.0465131	0.681031	2.05298	2.05298	13.7588	6.70184
SCD	0.0054921	0.242541	2.06777	2.06777	1518.92	734.568
BMP2	0.0185691	0.430131	2.07478	2.07478	82.3689	39.7001
STOM	0.00331767	0.191035	2.07496	2.07496	217.083	104.62
SLC22A5	0.0420342	0.649288	2.0802	2.0802	18.4344	8.86183
TSPAN3	0.00220647	0.156144	2.08476	2.08476	376.297	180.499
FLVCR1	0.0394189	0.631224	2.08775	2.08775	26.0893	12.4964
KIAA1522	0.0116039	0.343162	2.09001	2.09001	165.982	79.4169
ESPN	0.0395018	0.631224	2.09518	2.09518	69.1154	32.9878
BHLHE40	0.044532	0.663806	2.09592	2.09592	417.439	199.168
DIAPH2	0.0130934	0.36404	2.09983	2.09983	18.5652	8.84129
SH3D19	0.0409258	0.640046	2.10304	2.10304	29.6262	14.0873
PIK3CB	0.0498853	0.703277	2.10731	2.10731	20.2804	9.62383
LPIN3	0.0234823	0.489126	2.10816	2.10816	23.8012	11.29
IRF1	0.0334423	0.581595	2.10841	2.10841	28.6577	13.5921
MAPK3	0.0026137	0.169919	2.11098	2.11098	262.412	124.308
MXI1	0.0109831	0.336155	2.11697	2.11697	36.6646	17.3194
KIAA1217	0.0497715	0.703277	2.11842	2.11842	38.6279	18.2343
HSD17B11	0.0147685	0.383623	2.12097	2.12097	42.6488	20.1082
PRR13	0.00977433	0.318168	2.12146	2.12146	192.52	90.749
LRRC1	0.0177527	0.419956	2.12338	2.12338	42.7162	20.1171
CAMSAP3	0.0252461	0.509772	2.12538	2.12538	38.0236	17.8903
LRP4	0.000870532	0.0969174	2.12736	2.12736	241.767	113.647
EFNA2	0.0126377	0.359717	2.14838	2.14838	33.6556	15.6656
GCHFR	0.0322018	0.573476	2.14955	2.14955	15.458	7.19126
ERBB3	0.00600188	0.250327	2.15136	2.15136	196.832	91.4922
CD151	0.00735104	0.27661	2.15625	2.15625	130.169	60.3679
ASL	0.0294838	0.552837	2.15841	2.15841	45.4025	21.0351
SEMA4B	0.0231385	0.48777	2.16663	2.16663	102.949	47.5158
DGAT1	0.00640625	0.256431	2.17087	2.17087	209.836	96.6596
KIAA1522	0.0405491	0.637512	2.17135	2.17135	56.9803	26.2419
C1orf226	0.0310031	0.56642	2.17633	2.17633	23.4424	10.7715
SLCO2A1	0.0224128	0.478895	2.17917	2.17917	119.278	54.7353
SLC44A1	0.0280253	0.539169	2.18104	2.18104	35.5461	16.2977
LINC02381	0.0354775	0.599283	2.18282	2.18282	5.99452	2.74623
PAQR8	0.00201317	0.148799	2.18864	2.18864	82.4889	37.6896
INSIG1	0.0288918	0.548083	2.19227	2.19227	192.381	87.7542
HOOK1	0.0495313	0.702182	2.1941	2.1941	12.6371	5.75957
HSD17B7	0.0469154	0.682637	2.19617	2.19617	9.21075	4.194
RFLNA	0.0219497	0.472781	2.19787	2.19787	40.9492	18.6313
OAS3	0.0266083	0.522574	2.2009	2.2009	39.6158	17.9998
TCN2	0.0194279	0.442903	2.20421	2.20421	56.4413	25.6062
SPIRE2	0.00578295	0.247412	2.21427	2.21427	27.8416	12.5737
PAG1	0.00276869	0.174889	2.21443	2.21443	133.589	60.3265
GALNT12	0.0302786	0.560657	2.21474	2.21474	16.0575	7.25029
PRXL2B	0.0308017	0.564741	2.21713	2.21713	15.4703	6.97764
HEXB	0.0022672	0.156161	2.21866	2.21866	115.95	52.2614
RAB3B	0.0324793	0.575749	2.22816	2.22816	87.8384	39.4219
FAXDC2	0.00716107	0.273148	2.23016	2.23016	57.0713	25.5907
LLGL2	0.00411388	0.211766	2.23518	2.23518	69.4273	31.0612
PHYKPL	0.0205384	0.454472	2.23709	2.23709	22.1149	9.88555
PFKP	0.00842612	0.297806	2.24462	2.24462	121.78	54.2542
P4HA2	0.015708	0.395119	2.25337	2.25337	28.3131	12.5648
TDP2	0.00621596	0.253956	2.25965	2.25965	68.2722	30.2136
KLF4	0.015391	0.39054	2.26017	2.26017	105.094	46.4983
DOK4	0.0391151	0.628741	2.2605	2.2605	20.4666	9.05402
ZFP36	0.00655595	0.260092	2.26172	2.26172	283.487	125.341
AK4	0.0284763	0.543793	2.26295	2.26295	24.154	10.6737
SCNN1A	0.0111827	0.339347	2.26856	2.26856	190.345	83.9057
VSIG10	0.014254	0.377837	2.27442	2.27442	24.7016	10.8606
FBXO32	0.0440752	0.660313	2.27536	2.27536	11.8776	5.22011
GGH	0.00942241	0.313722	2.2773	2.2773	22.8708	10.043
PCDH1	0.0305011	0.563022	2.28575	2.28575	306.238	133.977
HEPH	0.00893698	0.305556	2.28615	2.28615	347.352	151.937
AGPAT2	0.012308	0.353618	2.28644	2.28644	294.214	128.677
SRD5A3	0.00553498	0.243326	2.28676	2.28676	46.7775	20.4558
C12orf75	0.00715636	0.273148	2.2926	2.2926	38.9757	17.0007
ATF3	0.0351087	0.597457	2.29743	2.29743	43.7636	19.049
MYO1D	0.00727723	0.275383	2.30367	2.30367	167.764	72.8245
KIF12	0.0305483	0.563145	2.305	2.305	24.5895	10.6679
ACSS2	0.0224217	0.478895	2.31022	2.31022	41.0073	17.7504
MISP	0.0427412	0.656739	2.31355	2.31355	137.013	59.2217
SOD3	0.0218592	0.471402	2.31793	2.31793	304.994	131.58
IQGAP2	0.0355388	0.599482	2.31946	2.31946	23.9171	10.3115
ACHE	0.00642703	0.256431	2.32122	2.32122	34.3196	14.7852
RETSAT	0.00357002	0.196274	2.32242	2.32242	93.5092	40.2637
RPS24	0.0428397	0.657281	2.32248	2.32248	17.4145	7.49826
TMC4	0.0373906	0.615185	2.32327	2.32327	101.361	43.6287
TNFSF9	0.0450905	0.670448	2.32501	2.32501	14.5958	6.27774
MVP	0.0185262	0.430131	2.32828	2.32828	82.7019	35.5207
FRZB	0.00949013	0.313992	2.32851	2.32851	237.114	101.831
ATP11A	0.017556	0.418791	2.33926	2.33926	49.3108	21.0796
PP7080	0.0476899	0.690651	2.34322	2.34322	21.6028	9.21929
STBD1	0.0152642	0.38843	2.35162	2.35162	25.6711	10.9163
TXNIP	0.00523537	0.234316	2.35179	2.35179	71.1308	30.2454
PTPN18	0.0256727	0.514987	2.35212	2.35212	10.0025	4.25255
VWA7	0.0266903	0.52274	2.35462	2.35462	16.9158	7.1841
TGFBR3	0.024841	0.504553	2.36784	2.36784	31.6322	13.3591
GUCD1	0.0176989	0.419341	2.36869	2.36869	19.9923	8.44026
FZD5	0.00911167	0.308567	2.37234	2.37234	62.597	26.3862
TRIB3	0.0224495	0.478914	2.37946	2.37946	47.1118	19.7993
LSR	0.0183055	0.42865	2.38028	2.38028	233.258	97.996
SLC46A1	0.0122168	0.353263	2.38357	2.38357	96.7773	40.6018
ERAP1	0.00191717	0.146387	2.3872	2.3872	56.3771	23.6164
MUC20	0.0212645	0.464196	2.39199	2.39199	106.617	44.5724
CLDN7	0.0131677	0.36404	2.39325	2.39325	164.614	68.7826
ARHGAP12	0.0468948	0.682637	2.39329	2.39329	9.27129	3.87386
COL23A1	0.039946	0.632496	2.39442	2.39442	4.83084	2.01754
ARHGAP27P1-BPTFP1-KPNA2P3	0.0467691	0.682308	2.39554	2.39554	22.723	9.48556
BRI3BP	0.0146423	0.383055	2.39776	2.39776	33.5529	13.9935
PRKCD	0.00550084	0.242541	2.39998	2.39998	43.8007	18.2505
MVP	0.00991225	0.319289	2.40012	2.40012	157.005	65.4155
SEMA4B	0.00428116	0.214338	2.40041	2.40041	74.9091	31.2068
CNNM4	0.000479371	0.0772007	2.40212	2.40212	104.064	43.3218
SIRT6	0.0489774	0.702182	2.40435	2.40435	22.1712	9.2213
ANG	0.0329034	0.5782	2.40539	2.40539	26.1344	10.865
ADAP1	0.0279919	0.539169	2.4078	2.4078	26.1823	10.874
ATP1A1	0.000394846	0.070635	2.41079	2.41079	690.511	286.425
DOK4	0.0499042	0.703277	2.41738	2.41738	17.5664	7.26673
KIF13B	0.0102688	0.325184	2.42323	2.42323	115.433	47.6361
CLSTN1	0.0173567	0.416874	2.43169	2.43169	144.059	59.2423
CXCL14	0.00772366	0.284848	2.43313	2.43313	659.418	271.017
RNASE4	0.0265336	0.522258	2.43526	2.43526	38.6201	15.8587
RILP	0.0332499	0.580098	2.43533	2.43533	13.1935	5.41752
GCNT1	0.0298537	0.556842	2.44001	2.44001	8.73674	3.58062
ABHD17C	0.0139945	0.372622	2.44797	2.44797	51.5796	21.0703
EPHX2	0.0113591	0.340488	2.45204	2.45204	18.8008	7.66741
PLEKHH1	0.00487638	0.229644	2.45312	2.45312	66.1386	26.961
C1QTNF12	0.0291739	0.550996	2.4551	2.4551	6.77225	2.75844
IGSF10	0.0294818	0.552837	2.45974	2.45974	5.52969	2.24808
IGSF10	0.0210154	0.461018	2.45991	2.45991	7.27233	2.95634
IGSF10	0.016077	0.40053	2.46015	2.46015	9.09588	3.6973
TGFBR3	0.0168033	0.410023	2.47079	2.47079	91.7831	37.1472
CAMK2N1	0.0107715	0.332832	2.47204	2.47204	152.023	61.4969
ELMO3	0.0351848	0.597457	2.47586	2.47586	17.3812	7.02025
HK2	0.00573686	0.246837	2.47788	2.47788	221.312	89.315
IPMK	0.0173706	0.416874	2.48805	2.48805	20.6038	8.28112
GALNT3	0.00811187	0.2932	2.49039	2.49039	100.928	40.5267
SLC36A1	0.0245895	0.502308	2.49284	2.49284	45.0452	18.0698
GATM	0.0343665	0.58913	2.49552	2.49552	15.132	6.06367
CCDC183	0.0390112	0.628306	2.49729	2.49729	19.2111	7.69278
SHROOM1	0.0176357	0.419341	2.49982	2.49982	21.3244	8.53037
CHPT1	0.00327002	0.189736	2.50102	2.50102	34.8034	13.9157
MXD1	0.0145069	0.381139	2.5011	2.5011	33.6604	13.4582
CGN	0.0201202	0.451386	2.5057	2.5057	115.774	46.2043
SLC6A8	0.00581753	0.247566	2.50967	2.50967	116.432	46.3935
IFNGR1	0.00405229	0.211766	2.50976	2.50976	89.1437	35.5188
DPP4	0.0495505	0.702182	2.51026	2.51026	28.0946	11.1919
PTPRJ	0.00232601	0.158142	2.51136	2.51136	54.2513	21.6024
SLC16A3	0.0438437	0.658506	2.51507	2.51507	35.2091	13.9993
NOXA1	0.0357394	0.601157	2.51545	2.51545	15.1913	6.03919
GLB1L2	0.00297551	0.180976	2.51734	2.51734	45.6461	18.1326
TGFBR3	0.00165631	0.139848	2.51738	2.51738	275.624	109.488
MYO18A	0.0262485	0.518364	2.5187	2.5187	36.5746	14.5212
ELF3	0.00540068	0.239309	2.52028	2.52028	281.675	111.763
SEMA6D	0.0262171	0.518318	2.52262	2.52262	19.9754	7.9185
CTNNA1	0.0407886	0.638459	2.52343	2.52343	9.97994	3.95491
ME1	0.00494422	0.229951	2.52632	2.52632	46.6996	18.4853
ENPP1	0.0235049	0.489126	2.52773	2.52773	38.9593	15.4128
PLAUR	0.00727654	0.275383	2.53091	2.53091	74.1096	29.2818
LMNTD2	0.0326838	0.576828	2.5349	2.5349	14.9891	5.9131
PRXL2B	0.00254275	0.166522	2.54108	2.54108	42.3538	16.6676
NQO1	0.00534772	0.237554	2.54383	2.54383	39.6316	15.5795
LACTB2	0.0355894	0.599768	2.54942	2.54942	17.7364	6.95703
GOLM1	0.000165355	0.042688	2.55534	2.55534	412.399	161.387
PHYKPL	0.0491882	0.702182	2.55699	2.55699	9.54749	3.73388
SEMA4G	0.00165453	0.139848	2.57296	2.57296	262.435	101.997
CKB	0.00572749	0.246837	2.5775	2.5775	122.335	47.4624
GGT1	0.0111716	0.339347	2.58482	2.58482	27.2727	10.5511
SYT7	0.0131179	0.36404	2.58622	2.58622	15.2942	5.91373
MXD1	0.0039318	0.209066	2.59393	2.59393	78.0424	30.0865
IL6R	0.0281305	0.539986	2.60289	2.60289	16.2269	6.23417
GBP3	0.0285663	0.544808	2.60463	2.60463	55.88	21.4541
GGT1	0.0178074	0.420136	2.60792	2.60792	18.817	7.21532
CDC42SE2	0.0234006	0.48847	2.6151	2.6151	17.7774	6.79795
ABO	0.0497745	0.703277	2.61839	2.61839	65.7607	25.1149
QPCT	0.0100605	0.32261	2.62262	2.62262	41.0414	15.649
TLCD4	0.0383498	0.624967	2.62729	2.62729	20.0177	7.61912
SEMA3B	0.00632344	0.254473	2.63479	2.63479	32.7043	12.4125
SFXN1	0.0293564	0.552302	2.63523	2.63523	8.99608	3.41377
RBM47	0.0135674	0.369329	2.64272	2.64272	36.3697	13.7622
SGK2	0.0374029	0.615185	2.64417	2.64417	16.6093	6.28147
SELENOP	0.00762758	0.283654	2.64564	2.64564	517.343	195.546
TRIM14	0.00918482	0.309866	2.65337	2.65337	58.239	21.949
GPX2	0.00877652	0.303004	2.65461	2.65461	190.025	71.5831
PPARA	0.00194094	0.146499	2.65846	2.65846	31.4069	11.8139
MYORG	0.00267509	0.170793	2.65936	2.65936	125.087	47.0366
HDHD3	0.0294228	0.552837	2.65965	2.65965	17.2769	6.49595
LPGAT1	0.0138648	0.372359	2.68604	2.68604	30.4792	11.3473
CYP2S1	0.0177031	0.419341	2.69	2.69	110.552	41.0974
POF1B	0.0261023	0.517877	2.69038	2.69038	29.974	11.1412
NDRG1	0.00171205	0.141845	2.69501	2.69501	570.431	211.662
CNKSR1	0.0177004	0.419341	2.69667	2.69667	51.5794	19.1271
CAPN12	0.0272491	0.529323	2.69864	2.69864	16.0002	5.929
ATP1B1	0.000403399	0.070635	2.69909	2.69909	214.885	79.6138
ENPP2	0.0203571	0.453154	2.7096	2.7096	10.7515	3.96795
ARHGEF2	0.0260699	0.517877	2.71279	2.71279	14.7832	5.44947
ITPR3	0.00493184	0.229951	2.71732	2.71732	258.399	95.0934
FOXD2-AS1	0.0292965	0.55223	2.71932	2.71932	13.2957	4.88934
PCSK6	0.0104811	0.329132	2.72097	2.72097	114.591	42.1139
MYO6	0.00666578	0.261536	2.72229	2.72229	70.1086	25.7536
PLAG1	0.0464277	0.680673	2.72273	2.72273	5.68489	2.08793
SLC36A1	0.00122024	0.115618	2.7255	2.7255	150.037	55.0492
SLC27A2	0.0492226	0.702182	2.73133	2.73133	12.8369	4.69986
CYP27A1	0.000939062	0.0995685	2.73193	2.73193	49.3561	18.0664
ATP10A	0.0334619	0.581595	2.73364	2.73364	17.6683	6.46331
F3	0.00411075	0.211766	2.73455	2.73455	69.7221	25.4967
TPPP	0.0385672	0.625443	2.73652	2.73652	6.44815	2.35633
POF1B	0.0119734	0.349071	2.73796	2.73796	41.668	15.2186
GUSB	0.000828227	0.0958001	2.74006	2.74006	135.761	49.5467
DIAPH1	0.0077065	0.284805	2.76057	2.76057	71.0832	25.7495
ATP8B1	0.00659233	0.260895	2.76156	2.76156	58.0606	21.0245
IRF7	0.0225831	0.480612	2.76751	2.76751	8.59157	3.10444
HPN	0.0147168	0.383623	2.76957	2.76957	45.2271	16.33
RNF43	0.00475484	0.22687	2.77546	2.77546	43.6748	15.7361
CXCL16	0.0139733	0.372615	2.77953	2.77953	62.945	22.6459
PPP1R3G	0.0469171	?	2.78733	2.78733	9.24611	3.31719
RAB25	0.030115	0.559793	2.78942	2.78942	24.3107	8.71533
TCN2	0.0098609	0.318788	2.79154	2.79154	28.3641	10.1607
ITGB4	0.0306253	0.563145	2.79284	2.79284	30.7152	10.9978
HOXC6	0.0327062	0.576828	2.79288	2.79288	6.98356	2.50049
ANPEP	0.0174117	0.416874	2.79738	2.79738	41.1062	14.6946
NOL3	0.0410897	?	2.81008	2.81008	7.66164	2.72649
TRIM2	0.00286586	0.177611	2.8127	2.8127	47.7162	16.9646
CLDN3	0.00239874	0.161816	2.81306	2.81306	63.2058	22.4687
TUBA4A	0.00179164	0.145359	2.8134	2.8134	91.2558	32.4361
EGLN3	0.000176352	0.044077	2.81546	2.81546	124.37	44.1741
USP53	0.0319536	0.571589	2.81603	2.81603	37.1039	13.176
ANXA4	0.00587404	0.247817	2.81854	2.81854	139.147	49.3684
ENTPD5	0.0106858	0.33194	2.83108	2.83108	25.5028	9.00817
LRRFIP2	0.0379817	0.621669	2.83344	2.83344	12.5124	4.41599
CD7	0.0302146	0.560055	2.83501	2.83501	13.5967	4.79599
MARVELD3	0.0395467	0.631224	2.83668	2.83668	19.4859	6.86927
SLC35A3	0.00934918	0.312962	2.84095	2.84095	38.2187	13.4528
PNMA2	0.0148528	0.383623	2.84215	2.84215	10.9501	3.85275
HGD	0.0481993	?	2.84798	2.84798	9.02814	3.17001
EFNA1	0.00105477	0.105554	2.85094	2.85094	79.5276	27.8952
VIL1	0.00779632	0.285753	2.85347	2.85347	114.509	40.1296
PRR15	0.00884008	0.303696	2.85486	2.85486	52.5905	18.4214
EPB41L4B	0.00779474	0.285753	2.85581	2.85581	52.9208	18.5309
SYT7	0.003285	0.189986	2.85715	2.85715	84.2541	29.4888
RCAN1	0.00197808	0.147746	2.85725	2.85725	43.7809	15.3228
SULT1B1	0.00558292	0.243326	2.85853	2.85853	58.7479	20.5518
HPN	0.0213899	0.465792	2.86857	2.86857	15.8673	5.53142
SERPINB1	0.0085283	0.298239	2.87354	2.87354	59.184	20.5962
SCARB1	0.00266468	0.170793	2.8824	2.8824	156.069	54.1455
CLMN	0.000514239	0.0783397	2.89667	2.89667	51.6043	17.815
HLA-DMA	0.0469529	?	2.8976	2.8976	9.18694	3.17054
SLC25A22	0.00169456	0.141052	2.90288	2.90288	20.128	6.93381
LGALS3	0.00513349	0.232679	2.90737	2.90737	482.745	166.042
RHPN2	0.00287161	0.177611	2.92076	2.92076	71.4133	24.4502
HNF1A	0.0139492	0.372615	2.92399	2.92399	41.2419	14.1047
CHDH	0.00590888	0.248243	2.94231	2.94231	33.0474	11.2318
SCNN1A	0.039119	0.628741	2.95408	2.95408	25.0453	8.4782
S100A6	0.00486838	0.229644	2.9571	2.9571	194.262	65.6933
ENTPD5	0.0146444	0.383055	2.9572	2.9572	29.4708	9.96579
OCLN	0.0398547	0.632496	2.95996	2.95996	12.462	4.2102
ELOVL2	0.0173284	0.416874	2.96011	2.96011	21.9078	7.40103
TJP3	0.00605275	0.250911	2.96069	2.96069	94.814	32.0243
SEMA3B	0.00407658	0.211766	2.96296	2.96296	55.7236	18.8067
TMEM164	0.0191766	0.439673	2.96348	2.96348	14.1998	4.79158
WSCD1	0.013224	0.364122	2.96519	2.96519	8.40449	2.83438
OSBPL9	0.0437145	0.657553	2.97444	2.97444	13.3158	4.47676
SLC17A9	0.0247478	0.504386	2.97776	2.97776	21.8346	7.33255
GJB1	0.00662013	0.260895	2.98381	2.98381	47.3885	15.8819
MTMR11	0.000783271	0.0936403	2.98387	2.98387	59.4361	19.9192
RORA	0.0341087	?	2.98819	2.98819	3.2024	1.07168
DEGS2	0.0197319	0.44718	2.98833	2.98833	11.8599	3.96874
PRSS8	0.0281618	0.539986	3.00228	3.00228	741.529	246.988
ARHGAP27	0.0175351	0.418791	3.01642	3.01642	43.3564	14.3734
VEGFA	0.0399257	?	3.02449	3.02449	6.32035	2.08973
VEGFA	0.0383345	?	3.02455	3.02455	6.49494	2.14741
DSCAML1	0.0112127	0.339494	3.02649	3.02649	11.2659	3.72245
LRRC75A	0.00346229	0.194555	3.03017	3.03017	38.2046	12.6081
CDA	0.000573396	0.0823702	3.04306	3.04306	88.482	29.0767
ERO1A	0.0247259	0.504386	3.04725	3.04725	15.5781	5.11219
BRINP2	0.0121109	0.351354	3.04936	3.04936	32.3453	10.6072
FLNB	0.00189369	0.146387	3.05226	3.05226	377.889	123.806
HCAR1	0.0433679	?	3.05483	3.05483	7.95873	2.60529
ARRDC4	0.00281742	0.176094	3.06099	3.06099	156.387	51.0904
AATK	0.0018197	0.145359	3.06111	3.06111	26.2495	8.57515
NR1H3	0.0339733	?	3.06324	3.06324	7.89501	2.57734
DPP4	0.0222539	0.477997	3.07159	3.07159	20.5445	6.68857
SIAE	0.0197653	0.447368	3.07231	3.07231	11.7987	3.84034
AP2A2	0.0376727	?	3.09075	3.09075	4.4124	1.42762
NAAA	0.0022123	0.156144	3.09317	3.09317	48.7224	15.7516
SUSD2	0.0166799	0.408131	3.10567	3.10567	14.8732	4.78905
B4GALNT3	0.00441256	0.217508	3.10825	3.10825	38.4113	12.3578
RASA4	0.000733852	0.0912178	3.10828	3.10828	13.578	4.36833
NDRG1	0.00226582	0.156161	3.10916	3.10916	42.6375	13.7135
GREM2	0.00311939	0.184604	3.11635	3.11635	66.457	21.3253
FXYD3	0.0494977	?	3.13489	3.13489	11.3897	3.63322
PLS1	0.01125	0.339494	3.14912	3.14912	40.8347	12.967
PAM	0.000142426	0.0402703	3.15385	3.15385	53.8069	17.0607
MTUS1	0.00523133	0.234316	3.1568	3.1568	29.4883	9.3412
HNF4A	0.00383093	0.204926	3.17031	3.17031	142.671	45.0024
RBM47	0.00949529	0.313992	3.17096	3.17096	58.9395	18.5873
P2RX4	0.00100954	0.103057	3.17977	3.17977	92.9398	29.2285
ACVRL1	0.00371618	0.201205	3.17994	3.17994	40.9887	12.8898
FXYD3	0.0022361	0.156161	3.18033	3.18033	483.67	152.082
FA2H	0.0128859	0.362053	3.1853	3.1853	36.9707	11.6067
KLC4	0.00345525	0.194555	3.18772	3.18772	12.7867	4.01123
PTPN3	0.045987	0.676997	3.19026	3.19026	20.7885	6.51625
PECR	0.0314054	?	3.2074	3.2074	6.65944	2.07627
SPOCK2	0.00709459	0.272768	3.2077	3.2077	35.7003	11.1296
PCDH19	0.0222724	0.477997	3.20786	3.20786	6.37644	1.98775
TMEM144	0.0135727	0.369329	3.20982	3.20982	22.08	6.87889
HPN	0.00527444	0.235473	3.21011	3.21011	75.4114	23.4918
TFRC	0.0351332	?	3.21682	3.21682	4.48654	1.39471
SH3KBP1	0.0150057	0.383623	3.21799	3.21799	47.232	14.6775
SLC22A18	0.00135573	0.123662	3.22363	3.22363	56.602	17.5585
SEMA6D	0.0250737	0.507542	3.22623	3.22623	25.1656	7.80031
CD68	0.0380407	0.621669	3.22768	3.22768	219.049	67.8657
DHRS11	0.00442616	0.217508	3.23499	3.23499	48.2064	14.9016
DOK4	0.0421738	?	3.23674	3.23674	7.03487	2.17345
SCARB1	0.0185036	0.430131	3.23916	3.23916	17.2332	5.32026
ITPKA	0.025298	0.509772	3.25214	3.25214	12.6464	3.88863
SIAE	0.000897269	0.0984959	3.25233	3.25233	87.424	26.8804
PAM	0.0115127	0.342937	3.26921	3.26921	16.1134	4.92885
IGF2	8.78252e-06	0.00711715	3.27311	3.27311	10840.5	3311.99
CECR2	0.00445689	0.217508	3.28166	3.28166	14.2655	4.34705
ABHD3	0.0208426	0.45797	3.28605	3.28605	19.8367	6.03662
PRDM16	0.0118483	0.347129	3.28798	3.28798	11.5186	3.50325
ENTPD5	0.039279	?	3.29406	3.29406	11.568	3.51179
BUD31	0.0292922	?	3.29529	3.29529	5.46061	1.65709
CORO2A	0.000810555	0.0951583	3.29632	3.29632	71.6295	21.7301
DPP4	0.000726384	0.0912178	3.29966	3.29966	135.752	41.1411
CRYL1	0.00197968	0.147746	3.29979	3.29979	32.9425	9.98322
RSPO3	0.000811995	0.0951583	3.30985	3.30985	43.3519	13.0978
ISX	0.0158031	0.395365	3.31134	3.31134	32.9474	9.94989
ABCC6	0.00342132	0.194089	3.31531	3.31531	15.3088	4.61759
LGALS9	0.0088485	0.303696	3.31744	3.31744	71.549	21.5675
PBLD	0.0434141	0.657553	3.32355	3.32355	13.8047	4.15361
RASEF	0.00428376	0.214338	3.33066	3.33066	35.003	10.5093
PLCXD1	0.00209455	0.151667	3.34096	3.34096	13.7248	4.10805
CAPN8	0.0254538	0.512327	3.34367	3.34367	27.7993	8.31401
B3GNT7	0.00356814	0.196274	3.34579	3.34579	74.4253	22.2445
SORL1	0.000715496	0.0912178	3.35124	3.35124	315.205	94.0561
CLDN7	0.0150793	0.384826	3.3513	3.3513	20.0181	5.97325
TNFRSF11B	0.0206486	0.455688	3.35693	3.35693	12.1278	3.61275
TSPAN15	0.000481069	0.0772007	3.3752	3.3752	43.5542	12.9042
ADORA1	0.027797	?	3.38071	3.38071	6.17164	1.82554
XK	0.049529	?	3.3869	3.3869	8.2453	2.43447
TMBIM1	0.00167225	0.139848	3.39671	3.39671	316.511	93.1818
OSGIN1	0.0159901	0.399483	3.41163	3.41163	16.328	4.78599
SGPP2	0.00716075	0.273148	3.41996	3.41996	15.442	4.51527
CYP3A5	0.0490319	?	3.42084	3.42084	10.038	2.93437
ANO9	0.00977329	0.318168	3.42403	3.42403	93.2381	27.2305
SYT7	0.00739929	0.277481	3.42919	3.42919	24.2066	7.05899
TACC1	0.0411164	?	3.45842	3.45842	6.90127	1.9955
MST1	0.00103741	0.104996	3.46213	3.46213	25.1631	7.2681
CXADR	0.0352923	0.598155	3.46642	3.46642	15.0832	4.35122
FOXA3	0.00736053	0.27661	3.47583	3.47583	15.8954	4.57312
PAQR5	0.00812147	0.2932	3.48901	3.48901	16.9832	4.86763
TFCP2L1	0.0435305	0.657553	3.52206	3.52206	14.92	4.23615
TRIM2	0.0118301	0.347129	3.52611	3.52611	5.46353	1.54945
TCF7L2	0.0109098	0.335643	3.53635	3.53635	21.7482	6.14991
MUC4	0.017206	0.415504	3.54318	3.54318	42.0298	11.8622
B3GALT5	0.0367198	0.60789	3.54555	3.54555	18.5842	5.24156
B3GALT5	0.0296165	0.554741	3.54585	3.54585	22.1664	6.25135
TMEM176A	0.00182791	0.145359	3.54611	3.54611	134.025	37.7948
AHCYL2	0.0126415	0.359717	3.55506	3.55506	17.3137	4.87017
RNF39	0.0102993	0.325286	3.57073	3.57073	20.2969	5.68424
PLLP	0.00632843	0.254473	3.58847	3.58847	25.524	7.1128
PNPO	0.00501754	?	3.60834	3.60834	10.6935	2.96356
KCNE3	0.000259869	0.0544889	3.61006	3.61006	42.9375	11.8938
TNFRSF11A	0.0132664	0.364122	3.61244	3.61244	34.814	9.63725
RNF220	0.0343933	0.58913	3.6161	3.6161	1.93605	0.535397
ENTPD5	0.0324387	?	3.61936	3.61936	9.38574	2.59321
SH3D21	0.00087599	0.0969193	3.62037	3.62037	71.4834	19.7448
TMEM70	0.0249238	?	3.63026	3.63026	5.42702	1.49494
CA2	0.0134485	0.367984	3.64312	3.64312	21.7109	5.95942
TMPRSS4	0.0433768	?	3.65349	3.65349	12.642	3.46026
CDX1	0.0128862	0.362053	3.65391	3.65391	46.7683	12.7995
ERO1A	0.000157185	0.0424234	3.65611	3.65611	331.772	90.7446
TTC39B	0.00325182	0.189296	3.65782	3.65782	22.0596	6.03081
CDHR2	0.0398887	0.632496	3.66834	3.66834	11.0485	3.01185
SRI	0.0187418	0.431887	3.67097	3.67097	17.3066	4.71444
NDNF	0.000733916	0.0912178	3.67525	3.67525	27.7005	7.53702
STX16	0.00252901	0.166233	3.67716	3.67716	8.66768	2.35717
LAMC2	0.0250038	0.506704	3.69593	3.69593	34.7419	9.40005
GIPR	0.00113415	0.111004	3.69696	3.69696	19.6196	5.30695
MCTP2	0.0351852	?	3.69762	3.69762	7.79167	2.10721
NDRG1	0.0112351	0.339494	3.70076	3.70076	14.1029	3.8108
PAM	0.00952378	0.314161	3.70253	3.70253	18.4911	4.99419
WIPF3	0.0150163	?	3.70387	3.70387	3.92699	1.06024
PAPSS2	0.0124724	0.357189	3.71346	3.71346	28.3334	7.62992
TACC1	0.0422496	?	3.7467	3.7467	6.20819	1.65698
NDRG1	0.000927203	0.099128	3.74851	3.74851	36.1676	9.64854
MGAT3	0.000286624	0.0576268	3.75494	3.75494	31.1233	8.28864
HNF4A	0.0284465	0.543793	3.76455	3.76455	14.1472	3.75799
TMPRSS2	0.0317311	0.571589	3.76577	3.76577	186.762	49.5947
VIPR2	0.0387974	?	3.76701	3.76701	5.56624	1.47763
SLC19A3	0.00476152	0.22687	3.77155	3.77155	21.2084	5.62326
MGLL	0.00116975	0.113244	3.79028	3.79028	185.861	49.0363
SLC26A2	0.000471889	0.0771171	3.82456	3.82456	189.101	49.4439
SNHG29	0.038752	0.626397	3.84157	3.84157	12.3636	3.21838
TM4SF1	0.000440596	0.0741303	3.84212	3.84212	95.6787	24.9026
COBL	0.000860237	0.0969174	3.85112	3.85112	29.5428	7.67121
MAP7	0.0149639	0.383623	3.86158	3.86158	15.9457	4.12932
TMPRSS6	0.0419922	?	3.87512	3.87512	5.73064	1.47883
ZBED6CL	0.0146584	?	3.88158	3.88158	7.33403	1.88945
CDX2	0.000529674	0.0799584	3.8819	3.8819	129.561	33.3757
FXYD3	0.0027	0.171768	3.89413	3.89413	47.0249	12.0759
GPR35	0.0379539	?	3.89633	3.89633	7.26603	1.86484
LMO7	0.00340521	0.193792	3.89725	3.89725	44.4552	11.4068
ORM1	0.0429945	0.657433	3.90499	3.90499	16.1476	4.13511
SLCO2B1	0.0114162	0.34097	3.91709	3.91709	68.2217	17.4164
SLC39A14	0.0484033	?	3.9224	3.9224	11.2934	2.8792
VTN	0.000868492	0.0969174	3.92899	3.92899	114.108	29.0427
BAIAP2L2	0.000225751	0.050488	3.9341	3.9341	60.9047	15.4812
LMO7	0.0150107	0.383623	3.93909	3.93909	22.4651	5.70311
TJP3	0.000906828	0.0984959	3.96515	3.96515	36.9821	9.3268
DOK4	0.0289186	?	3.98667	3.98667	6.28942	1.57761
TMPRSS4	9.49149e-05	0.0337796	4.00381	4.00381	133.109	33.2455
TNFSF10	0.00319279	0.186469	4.00658	4.00658	28.7052	7.16451
SDCBP2	0.0064441	0.256431	4.01346	4.01346	83.8779	20.8992
EPCAM	0.00981892	0.318168	4.02499	4.02499	575.419	142.962
MELTF	4.9304e-05	0.0204245	4.02512	4.02512	135.393	33.6369
UGT8	0.0365557	?	4.03538	4.03538	8.15218	2.02018
TMPRSS4	0.009161	0.309649	4.03548	4.03548	20.4018	5.05561
ALKBH3	0.00239704	?	4.03773	4.03773	7.70329	1.90783
PAM	0.000466507	0.0769435	4.04221	4.04221	43.6969	10.8102
PRR15L	0.000317822	0.0602273	4.05017	4.05017	99.6737	24.6098
OSBPL9	0.0390681	?	4.05246	4.05246	3.51127	0.866454
UNC5CL	0.0112828	0.339494	4.06657	4.06657	23.4894	5.77622
DPP4	0.000801408	0.0951583	4.07762	4.07762	107.007	26.2425
SLC38A3	0.04077	0.638459	4.07873	4.07873	9.53507	2.33775
ERO1A	0.000101894	0.0349044	4.08037	4.08037	32.42	7.94536
NPNT	0.0003116	0.059707	4.10055	4.10055	24.9081	6.07432
ERO1A	0.00248195	0.165025	4.10883	4.10883	23.0159	5.60156
NOSTRIN	0.0113732	0.340488	4.11029	4.11029	13.6134	3.31202
SLC11A2	0.00450724	0.219365	4.11057	4.11057	34.1541	8.30886
IGSF1	0.00155295	0.135602	4.11685	4.11685	10.8194	2.62809
ACSL5	0.00679656	0.266082	4.11804	4.11804	49.9144	12.1209
DPP4	0.000311725	0.059707	4.1314	4.1314	53.686	12.9946
MIA-RAB4B	0.0250245	?	4.13527	4.13527	6.46797	1.5641
FER1L6	0.00469922	0.226236	4.14009	4.14009	54.2935	13.1141
RBP4	0.0149078	0.383623	4.15453	4.15453	37.3017	8.97855
MGAT4A	0.000835821	0.0960548	4.16468	4.16468	30.12	7.23225
FAM83E	0.00261038	0.169919	4.17403	4.17403	40.2788	9.64986
CLRN3	0.0130257	0.363678	4.17851	4.17851	18.9172	4.52727
FAR2	0.000634334	0.0882765	4.20064	4.20064	14.0888	3.35396
TFF2	0.0336907	0.583219	4.2009	4.2009	332.724	79.2031
RGS3	0.0214383	?	4.20393	4.20393	7.82215	1.86067
LMNTD2-AS1	0.00213419	0.152676	4.22346	4.22346	36.222	8.57637
LGALS3	0.0113438	0.340488	4.22529	4.22529	15.4684	3.66092
ERO1A	0.0029126	0.179523	4.25402	4.25402	15.5357	3.65202
ATP2A3	0.00162419	0.139848	4.26062	4.26062	95.8637	22.4999
SQOR	0.000826099	0.0958001	4.26144	4.26144	48.3646	11.3493
ISG20	0.0107729	?	4.26461	4.26461	10.1815	2.38745
SLC39A4	0.00491182	0.229644	4.26471	4.26471	20.9553	4.91366
USH1C	0.00742152	0.27754	4.27035	4.27035	18.4849	4.32867
ARHGAP45	0.0169373	0.411601	4.29749	4.29749	34.2522	7.97028
MIR194-2HG	0.01435	0.37837	4.30181	4.30181	14.6605	3.40798
ABCC2	0.0215162	?	4.30401	4.30401	8.06478	1.87378
FER1L5	0.00832922	?	4.30543	4.30543	11.0303	2.56196
TMEM176B	0.000288178	0.0576268	4.30628	4.30628	110.302	25.6142
CCL5	0.00512727	?	4.32462	4.32462	7.51473	1.73766
SNAP47	0.0341798	?	4.32821	4.32821	2.59992	0.600691
SLC39A14	0.000929342	0.099128	4.34378	4.34378	65.5409	15.0884
SEMA3B	0.00703145	0.272768	4.35202	4.35202	35.4315	8.14141
RNASE4	0.0490001	?	4.35328	4.35328	4.84193	1.11225
SLC17A4	0.0115335	0.342983	4.35356	4.35356	27.026	6.20779
CPEB2	0.00972393	?	4.35764	4.35764	8.82986	2.02629
CTSS	0.00503319	0.230557	4.37352	4.37352	18.6599	4.26656
B3GALT5	0.0271016	0.527608	4.38894	4.38894	19.4651	4.43504
RNF183	0.0425084	?	4.39554	4.39554	4.92233	1.11985
ZFYVE19	0.0375721	?	4.4267	4.4267	3.39796	0.767607
FOXD2	0.000150675	0.041412	4.43477	4.43477	37.1639	8.38011
HRH2	0.00435484	?	4.44004	4.44004	12.0417	2.71208
TMEM253	0.0142549	?	4.45004	4.45004	7.62598	1.71369
SLC16A4	0.0239452	?	4.45274	4.45274	5.4862	1.2321
SLC39A5	0.000999576	0.103057	4.45701	4.45701	91.3859	20.5039
ABCC3	0.000117577	0.0374001	4.45923	4.45923	132.035	29.6093
TMEM45B	0.00413712	0.211766	4.46959	4.46959	55.2112	12.3526
BMP8B	0.00490242	0.229644	4.4753	4.4753	19.1751	4.28465
HOXD1	0.00947267	?	4.48709	4.48709	4.02258	0.896478
P4HA1	0.0219471	?	4.50019	4.50019	2.67032	0.593378
SMPD3	0.00100278	0.103057	4.51301	4.51301	48.336	10.7104
NAGS	0.0222503	?	4.5182	4.5182	4.66967	1.03353
DUOXA2	0.00175517	0.144077	4.53447	4.53447	64.9995	14.3345
BCKDHB	0.0358306	?	4.53677	4.53677	4.7747	1.05245
TRNT1	0.0432902	?	4.53924	4.53924	2.97557	0.655521
KLF5	0.00424971	0.214338	4.5427	4.5427	60.6715	13.3558
SCARB1	0.0359313	?	4.5464	4.5464	10.044	2.20923
ARHGAP45	0.038534	?	4.55417	4.55417	4.12482	0.905724
EPS8L3	0.000541408	0.0803675	4.55672	4.55672	82.4863	18.1021
PLCB4	0.0403528	?	4.56054	4.56054	8.14732	1.78648
ARHGAP26	0.00183876	0.145572	4.5719	4.5719	25.7228	5.62627
PAM	0.0205405	?	4.59199	4.59199	9.59872	2.09032
HHLA2	0.00139595	0.125587	4.60066	4.60066	56.2092	12.2176
APOA1	0.0352175	0.597457	4.6029	4.6029	13.0487	2.83489
SLC9A3	0.0086203	0.300416	4.60568	4.60568	27.5591	5.98372
ERO1A	0.00118284	0.113279	4.61121	4.61121	18.7731	4.07119
SCARB1	0.0283432	?	4.61688	4.61688	5.75489	1.24649
TFF3	0.0205845	0.454928	4.61937	4.61937	558.741	120.956
VILL	0.00492605	?	4.62043	4.62043	11.8188	2.55796
USH1C	0.038851	0.626859	4.65689	4.65689	67.9081	14.5823
TTR	0.0321635	0.573476	4.66888	4.66888	212.035	45.4145
SLC1A1	0.000404467	0.070635	4.67074	4.67074	61.6563	13.2006
RAB17	0.00794587	?	4.67478	4.67478	7.75947	1.65986
RIMKLA	0.000687992	0.0901118	4.707	4.707	12.3932	2.63294
B3GALT5	0.0170044	0.412668	4.71601	4.71601	22.2135	4.71024
GDPD2	0.000325657	0.0610624	4.71737	4.71737	44.6923	9.474
C1orf115	0.00026001	0.0544889	4.71898	4.71898	25.2657	5.35405
IL22RA1	0.00709115	0.272768	4.73931	4.73931	47.8296	10.0921
CADPS	0.0252292	?	4.74414	4.74414	9.00515	1.89816
ABCC6P1	0.0033511	0.191939	4.74822	4.74822	11.2577	2.37094
CEACAM6	0.00644929	0.256431	4.7507	4.7507	5429.8	1142.95
RSPO1	0.0416611	?	4.7795	4.7795	3.60371	0.753993
SH3D21	0.00152721	0.134011	4.7851	4.7851	63.791	13.3312
EVA1B	0.0135806	0.369329	4.79142	4.79142	11.1468	2.32641
SERPINF1	0.0384418	?	4.83746	4.83746	4.54919	0.940409
GDA	0.0107811	0.332832	4.85033	4.85033	22.3052	4.59869
CDHR5	0.0313173	?	4.85611	4.85611	11.6783	2.40487
CALML4	0.00182774	0.145359	4.86216	4.86216	38.6693	7.95311
ABLIM1	0.00905235	0.308316	4.87501	4.87501	24.6933	5.06528
SERPINA1	0.0161673	?	4.87533	4.87533	10.594	2.17297
CLCN2	0.04684	?	4.89446	4.89446	4.09642	0.83695
SLC45A1	0.0498393	?	4.91042	4.91042	2.08827	0.425273
POU4F1	0.0179986	0.423527	4.92749	4.92749	4.08077	0.828165
PAM	0.0020433	0.150402	4.93773	4.93773	24.8462	5.0319
ANKS4B	0.00315238	0.185938	4.94163	4.94163	16.7105	3.38158
MGLL	0.0252983	0.509772	4.9468	4.9468	17.9476	3.62812
MUC1	0.000151113	0.041412	4.95139	4.95139	204.482	41.298
EPHA10	0.0125655	?	4.96827	4.96827	7.41096	1.49166
MASP1	0.046023	?	4.99841	4.99841	2.42487	0.485128
HHLA2	0.0198614	0.448018	5.01281	5.01281	24.4456	4.87664
LY75	0.0198723	?	5.02809	5.02809	5.63267	1.12024
NPC1L1	0.00356792	0.196274	5.03267	5.03267	49.5131	9.83834
KIF16B	0.00860432	?	5.0423	5.0423	12.2065	2.42082
METTL7B	0.0151581	?	5.04277	5.04277	10.665	2.11491
BNIP5	0.00374432	0.202114	5.04709	5.04709	18.4779	3.6611
SERPINA1	0.0106963	0.33194	5.062	5.062	142.732	28.1968
SLC44A4	0.00743203	0.27754	5.07491	5.07491	496.955	97.924
MFNG	0.0290929	?	5.07882	5.07882	4.67726	0.920935
TCN1	8.93979e-05	0.0324989	5.11096	5.11096	44.0166	8.61219
NTRK1	0.0391441	0.628741	5.12852	5.12852	0.343472	0.0669728
SPOCK2	0.000231815	0.050488	5.13666	5.13666	24.8925	4.84604
ACE2	0.001861	0.146387	5.18058	5.18058	35.5648	6.86502
HINT1	0.00427558	?	5.19839	5.19839	3.69767	0.71131
TMEM37	2.63702e-06	0.00361332	5.20183	5.20183	82.4211	15.8446
HEPH	0.000567749	0.082222	5.21516	5.21516	62.2111	11.9289
CDH17	0.000191176	0.0460191	5.21832	5.21832	29.2262	5.60069
MUC1	0.00692541	?	5.22536	5.22536	8.8852	1.7004
CDH17	0.00932296	0.31291	5.23683	5.23683	637.432	121.721
AMN	2.52148e-05	0.0128329	5.26084	5.26084	73.4931	13.9699
GDNF	0.0412458	?	5.2709	5.2709	2.26466	0.429652
XPNPEP2	0.000228678	0.050488	5.27354	5.27354	19.4059	3.67987
B3GALT5	0.028842	0.547721	5.31359	5.31359	16.7681	3.1557
PTPRH	1.38558e-05	0.00910301	5.31605	5.31605	74.5873	14.0306
ENTPD8	0.00230624	0.157399	5.32412	5.32412	22.7289	4.26904
NELL2	0.000769608	0.0928796	5.33682	5.33682	3.45298	0.647012
FABP1	0.00412673	0.211766	5.34757	5.34757	314.589	58.8284
SERPINA1	0.0116166	0.343162	5.36718	5.36718	144.224	26.8715
GOLGA7B	0.0275891	?	5.41487	5.41487	2.2168	0.409391
ALPG	0.0241591	?	5.4218	5.4218	13.441	2.47907
SLC9A3	0.0365453	0.606692	5.43332	5.43332	179.557	33.0474
USP2	0.0367464	?	5.44596	5.44596	3.14093	0.576745
TF	0.0184997	0.430131	5.44862	5.44862	151.934	27.8848
AOAH	0.0345725	?	5.45373	5.45373	2.85819	0.524081
AOAH	0.00633326	?	5.45522	5.45522	6.68491	1.22542
MTTP	0.0215276	0.467079	5.45682	5.45682	67.7224	12.4106
LRG1	0.001777	0.145201	5.4593	5.4593	17.7319	3.24802
MYO7B	0.00503528	0.230557	5.462	5.462	255.71	46.8161
CEACAM1	0.0191785	0.439673	5.47285	5.47285	104.156	19.0314
PTAFR	0.00428289	0.214338	5.47915	5.47915	14.2121	2.59385
CYP2B6	0.0014499	0.128493	5.50326	5.50326	44.4657	8.07989
GOLM1	1.02648e-05	0.00794985	5.5455	5.5455	328.092	59.1637
PLOD2	0.000445289	0.0741303	5.55599	5.55599	62.8652	11.3148
TTC22	4.50475e-05	0.0191055	5.56126	5.56126	34.1239	6.136
GPR35	8.93005e-05	0.0324989	5.59254	5.59254	39.6716	7.09367
SEMA3B	0.00579188	0.247412	5.59469	5.59469	7.61277	1.36071
SLC51A	0.007871	0.287308	5.61337	5.61337	121.469	21.6392
UBD	0.00886859	?	5.64928	5.64928	11.1409	1.9721
HLA-DMB	0.00944375	?	5.65399	5.65399	1.88604	0.333578
C11orf86	0.0277698	?	5.69295	5.69295	4.99049	0.876608
SERPINA1	0.0137037	?	5.72441	5.72441	9.9866	1.74456
MYO1A	0.000233505	0.050488	5.73097	5.73097	46.8078	8.16752
ESPN	1.82551e-05	0.00956409	5.76487	5.76487	25.4831	4.42042
FUT2	0.010209	0.325184	5.76993	5.76993	28.582	4.95361
LINC01559	3.11501e-05	0.0149967	5.80636	5.80636	93.7519	16.1464
IL2RG	0.00596893	0.249588	5.81524	5.81524	293.364	50.4474
LRRC66	0.00688293	?	5.82211	5.82211	14.6412	2.51476
CA12	5.75684e-06	0.00603215	5.82504	5.82504	97.8347	16.7955
MUC1	3.07915e-06	0.00391777	5.82521	5.82521	223.997	38.4529
MTA3	0.0477552	?	5.83542	5.83542	2.09191	0.358484
USH1C	0.0184623	?	5.84316	5.84316	8.34423	1.42803
LCN15	0.0206701	0.455688	5.8533	5.8533	56.3083	9.61994
MALRD1	0.0114087	?	5.88433	5.88433	12.0046	2.0401
PHGR1	0.0259808	0.517877	5.90252	5.90252	61.0162	10.3373
PAM	0.0137634	?	5.91635	5.91635	7.51773	1.27067
MEP1A	0.0018225	0.145359	5.9338	5.9338	238.796	40.2433
CIDEB	0.0035284	0.19611	5.95475	5.95475	26.6029	4.46751
SERPINA4	0.00136295	0.123662	5.9642	5.9642	33.4372	5.60631
PADI2	9.67137e-05	0.0337796	5.97285	5.97285	89.2449	14.9418
GNRH2	0.0248894	?	5.97986	5.97986	1.04615	0.174946
PRKCSH	0.00136762	0.123662	5.9847	5.9847	12.4883	2.0867
CDHR5	0.00134843	0.123662	5.98807	5.98807	2152.65	359.49
SLC44A4	0.000125808	0.0386381	6.02976	6.02976	52.7457	8.74757
ARHGAP45	0.000512235	0.0783397	6.03544	6.03544	21.9816	3.64208
CDCP1	4.9017e-06	0.00545712	6.04202	6.04202	150.528	24.9136
FAM3D	0.00224609	0.156161	6.05813	6.05813	30.8804	5.09736
CEACAM1	0.00822656	0.293667	6.15366	6.15366	1992.77	323.834
C15orf48	0.00571104	0.246837	6.23053	6.23053	19.9555	3.20285
RBP4	0.0399057	0.632496	6.23979	6.23979	55.6701	8.92179
TSPAN8	0.00249106	0.165025	6.24682	6.24682	316.329	50.6384
SELENOP	0.00745926	0.277974	6.24796	6.24796	15.6912	2.51142
TMEM135	0.0146978	?	6.2524	6.2524	2.05622	0.328868
TRIM15	0.0168918	?	6.25536	6.25536	11.648	1.86208
MUC3A	0.00587041	0.247817	6.25886	6.25886	238.025	38.0302
TMEM132C	7.86317e-07	0.00127333	6.25979	6.25979	22.5521	3.60268
GLTPD2	0.0189894	?	6.27165	6.27165	6.85404	1.09286
DUOX2	0.00853202	0.298239	6.27621	6.27621	1097.95	174.938
HNF4G	0.0098453	?	6.28908	6.28908	7.34873	1.16849
DMBT1	0.030625	0.563145	6.33097	6.33097	17.6839	2.79324
SLC6A14	0.00362893	0.198505	6.34565	6.34565	36.8278	5.80362
NT5C2	0.0204295	?	6.35896	6.35896	2.42329	0.381083
HAPLN1	0.00373625	?	6.39851	6.39851	7.11665	1.11224
PCSK5	0.00418274	0.212878	6.4138	6.4138	16.3319	2.54637
PLAC8	0.000269409	0.0556663	6.43419	6.43419	50.6304	7.86896
PRSS3	0.0106845	0.33194	6.43603	6.43603	18.5403	2.8807
APOBR	0.000695845	0.0904751	6.44939	6.44939	20.448	3.17053
NR1I2	0.00511992	?	6.47224	6.47224	13.0952	2.02328
LGI4	0.000601298	0.0850074	6.49131	6.49131	25.2343	3.88739
RASSF6	0.0215771	0.467582	6.50931	6.50931	16.3744	2.51553
UGT8	0.00111306	?	6.51152	6.51152	9.41968	1.44662
MOGAT3	0.00166523	0.139848	6.51945	6.51945	36.0564	5.53059
CDH16	0.0280384	?	6.53101	6.53101	3.8279	0.586112
CLIC5	0.00474456	0.22687	6.54764	6.54764	15.7542	2.40608
INHBE	0.0176107	?	6.58883	6.58883	3.67834	0.558269
SLC15A1	0.000598619	0.0850074	6.60156	6.60156	36.4212	5.51706
DUOX2	0.00363289	0.198505	6.65858	6.65858	473.617	71.1288
CLIC5	0.00661542	0.260895	6.66002	6.66002	96.4932	14.4884
GPA33	0.00132469	0.122899	6.68406	6.68406	457.673	68.4724
ITGB2	0.00710518	0.272768	6.69601	6.69601	18.0696	2.69856
FXYD3	0.0250565	?	6.7111	6.7111	5.81316	0.866201
MUC12	0.0316868	0.571589	6.72039	6.72039	1019.31	151.675
SLC51B	0.0084649	?	6.72403	6.72403	6.50792	0.967861
HHLA2	0.00162843	0.139848	6.74642	6.74642	35.9176	5.32395
MMP7	0.000271878	0.0556663	6.8345	6.8345	36.9025	5.39945
APOA4	0.0380324	0.621669	6.85004	6.85004	22.6257	3.303
PLCB4	0.00171205	?	6.8883	6.8883	8.63771	1.25397
MTMR11	0.00627597	0.254473	6.91019	6.91019	14.1401	2.04627
TRIM31	0.00583719	0.247566	6.9177	6.9177	109.604	15.844
MLXIPL	0.00295262	0.180739	7.01952	7.01952	31.8314	4.53469
SLC3A1	0.00822316	?	7.02409	7.02409	7.6212	1.08501
MGAM2	0.000164159	0.042688	7.02486	7.02486	89.0277	12.6732
GRIK3	0.004958	?	7.0477	7.0477	3.85569	0.547085
AOC1	0.00267231	0.170793	7.07097	7.07097	169.042	23.9065
CEACAM7	0.0374368	0.615185	7.13762	7.13762	226.979	31.8003
TMEM163	0.000986583	0.103057	7.17105	7.17105	24.9621	3.48096
ATP2A3	0.00697412	?	7.18313	7.18313	10.3961	1.4473
PDX1	0.00382326	?	7.18812	7.18812	9.81285	1.36515
CA12	0.00109919	?	7.22201	7.22201	13.4824	1.86685
TBC1D32	0.00916756	?	7.27298	7.27298	1.83431	0.252208
NSUN7	0.00150611	?	7.30455	7.30455	5.27172	0.721703
VIPR1	0.0109715	?	7.31951	7.31951	5.45342	0.745052
ITIH2	0.0233783	0.48847	7.35218	7.35218	45.9202	6.2458
SLCO2B1	0.00135803	0.123662	7.35277	7.35277	35.1556	4.78128
SLC17A4	0.00294781	0.180739	7.36545	7.36545	17.0811	2.31908
FXYD2	0.00875077	?	7.39986	7.39986	3.68076	0.497409
FADS6	0.00360134	?	7.42646	7.42646	6.52717	0.878907
CDHR5	0.00163305	0.139848	7.4384	7.4384	17.2144	2.31427
HAVCR1	0.00522277	0.234316	7.43864	7.43864	26.8097	3.60411
AGT	6.40061e-06	0.00633411	7.43996	7.43996	56.5377	7.5992
ZFYVE28	0.00335745	?	7.44268	7.44268	10.6142	1.42612
GUCY2C	0.000425913	0.0736581	7.46781	7.46781	34.1056	4.56701
LGALS4	0.00628299	0.254473	7.4814	7.4814	304.966	40.7632
ABCG2	0.00954638	?	7.49646	7.49646	2.88195	0.384442
CEACAM7	0.0137766	0.372046	7.55853	7.55853	781.326	103.37
SERPINA5	0.000765505	0.0928796	7.56026	7.56026	29.6895	3.92705
AFP	0.0370993	0.612465	7.56276	7.56276	503.023	66.5131
TINAG	0.00512283	?	7.6854	7.6854	8.91265	1.15969
ATP10B	0.00011639	0.0374001	7.6961	7.6961	69.7013	9.05671
F2	0.000294394	0.0576268	7.72104	7.72104	28.5779	3.7013
DPYSL2	0.0026472	0.170793	7.76275	7.76275	7.4103	0.954596
PRELID2	0.000684001	?	7.7634	7.7634	5.84566	0.752976
ST6GALNAC6	3.89318e-05	0.0182498	7.81431	7.81431	78.7879	10.0825
ANO9	0.000906071	0.0984959	7.83889	7.83889	24.2506	3.09363
STEAP2	0.00233492	?	7.84693	7.84693	6.38921	0.81423
RAPGEF5	0.00465284	?	7.89346	7.89346	2.94333	0.372882
PLCB4	0.00592555	?	7.91339	7.91339	5.5415	0.700269
HKDC1	0.000213797	0.0494593	7.95141	7.95141	41.8371	5.26159
MUC13	0.00237633	0.160949	7.99443	7.99443	1192.92	149.218
RHOT2	0.00180427	?	8.01428	8.01428	2.56989	0.320664
HHLA2	0.000445046	0.0741303	8.12616	8.12616	49.3376	6.07145
RNF186	0.00192301	0.146387	8.19144	8.19144	102.716	12.5394
SLC26A3	0.00304103	0.182174	8.22714	8.22714	33.5191	4.07421
GCNT3	0.0017461	0.143997	8.27756	8.27756	206.487	24.9454
CCDC68	0.000106662	0.0358485	8.39138	8.39138	29.2136	3.48139
PCDH1	0.00202359	?	8.42178	8.42178	12.3925	1.47148
TMEM92	7.76739e-07	0.00127333	8.48569	8.48569	29.3899	3.46346
SYN3	0.0095646	?	8.55141	8.55141	2.20565	0.257929
LRRC19	0.00108679	0.10755	8.55591	8.55591	22.5068	2.63055
SULT1A1	1.2614e-05	0.009032	8.67955	8.67955	14.0742	1.62153
ATP10B	0.000687117	0.0901118	8.70358	8.70358	21.2213	2.43823
ALOX15B	0.00489233	?	8.81601	8.81601	5.00923	0.568197
TSPAN8	0.00149132	0.131509	8.82769	8.82769	157.5	17.8416
CP	0.000961554	0.10135	8.90338	8.90338	206.394	23.1815
RGMB	0.00413485	0.211766	8.97624	8.97624	1.00481	0.111941
MUC17	0.0183126	0.42865	9.00958	9.00958	610.474	67.7583
SERPINF2	0.00055021	0.0809991	9.10053	9.10053	21.0525	2.31332
CCL20	0.00116381	?	9.1411	9.1411	9.2872	1.01598
APOM	0.00181829	0.145359	9.18108	9.18108	6.7013	0.729903
TM4SF4	0.000735273	0.0912178	9.19963	9.19963	17.1883	1.86837
CDH4	0.0028034	0.176094	9.24057	9.24057	0.937909	0.101499
CREB3L3	0.00023525	0.050488	9.73759	9.73759	28.9036	2.96825
CFB	7.95156e-05	0.0301364	9.8351	9.8351	46.6146	4.73961
PC	3.04597e-05	?	9.92451	9.92451	7.7519	0.781086
LGALS14	0.00680579	?	9.945	9.945	8.55541	0.860273
CDHR2	0.00848472	0.298239	10.1694	10.1694	103.868	10.2138
ALDOB	0.00841705	0.297806	10.3034	10.3034	64.7146	6.28091
CIDEC	0.000566511	0.082222	10.3223	10.3223	28.6318	2.77379
ATP10B	0.000140387	0.0402703	10.4833	10.4833	18.1757	1.73378
CEACAM5	0.00405905	0.211766	10.5025	10.5025	3320.71	316.184
EPS8L3	0.0400293	0.633253	10.5512	10.5512	26.729	2.53327
CEACAM5	0.00262932	0.170313	10.6902	10.6902	5315.13	497.199
PCP4L1	0.00251599	?	10.9712	10.9712	2.31854	0.211328
ALPI	0.000132733	0.0394167	10.9922	10.9922	21.9879	2.00032
URAD	0.000910679	?	11.0287	11.0287	6.84675	0.620814
CCL20	8.87482e-05	?	11.3658	11.3658	12.5537	1.10451
HAGLR	1.40149e-05	?	11.5406	11.5406	5.88679	0.510093
CEACAM5	0.00281349	0.176094	11.6788	11.6788	230.569	19.7426
MOGAT2	0.000771694	0.0928796	11.8665	11.8665	20.4576	1.72397
APOB	0.000735413	0.0912178	12.3387	12.3387	244.594	19.8233
B3GALT5	0.0168714	0.41056	12.8951	12.8951	110.658	8.58142
SLC36A2	1.65518e-05	0.00921365	14.1348	14.1348	29.3964	2.07972
SERPINA1	0.000198722	0.0465767	14.785	14.785	18.2493	1.23432
APOA2	0.00614381	0.252747	15.2174	15.2174	62.1654	4.08514
CREB3L3	8.53231e-06	0.00711715	15.3679	15.3679	32.4617	2.1123
FGB	1.76453e-05	0.00952473	15.7948	15.7948	29.0945	1.84203
DPEP1	0.0243672	0.500638	15.9271	15.9271	27.3866	1.7195
LDOC1	1.36958e-15	4.87926e-12	19.3976	19.3976	118.049	6.08575
PLG	1.11482e-05	?	19.9873	19.9873	12.821	0.641455
MUC17	0.000168104	0.0427776	20.4244	20.4244	284.442	13.9266
CXCL5	3.56492e-12	1.05837e-08	25.3278	25.3278	51.2742	2.02443
TMEM150B	3.174e-07	0.000628205	29.5744	29.5744	22.4215	0.758138

## Sheet: Small Intestine genes SMAD1KO
	Entrez Gene ID	Gene Symbol	Gene Name	Original Symbol
1	339977	LRRC66	leucine rich repeat containing 66	LRRC66
2	26	AOC1	amine oxidase copper containing 1	AOC1
3	28	ABO	ABO, alpha 1-3-N-acetylgalactosaminyltransferase and alpha 1-3-galactosyltransferase	ABO
4	10317	B3GALT5	beta-1,3-galactosyltransferase 5	B3GALT5
5	2168	FABP1	fatty acid binding protein 1	FABP1
6	4224	MEP1A	meprin A subunit alpha	MEP1A
7	153768	PRELID2	PRELI domain containing 2	PRELID2
8	55512	SMPD3	sphingomyelin phosphodiesterase 3	SMPD3
9	123099	DEGS2	delta 4-desaturase, sphingolipid 2	DEGS2
10	200931	SLC51A	solute carrier family 51 subunit alpha	SLC51A
11	229	ALDOB	aldolase, fructose-bisphosphate B	ALDOB
12	80115	BAIAP2L2	BAR/IMD domain containing adaptor protein 2 like 2	BAIAP2L2
13	248	ALPI	alkaline phosphatase, intestinal	ALPI
14	389384	BNIP5	BCL2 interacting protein 5	BNIP5
15	290	ANPEP	alanyl aminopeptidase, membrane	ANPEP
16	80168	MOGAT2	monoacylglycerol O-acyltransferase 2	MOGAT2
17	28982	FLVCR1	FLVCR heme transporter 1	FLVCR1
18	643382	TMEM253	transmembrane protein 253	TMEM253
19	80201	HKDC1	hexokinase domain containing 1	HKDC1
20	55630	SLC39A4	solute carrier family 39 member 4	SLC39A4
21	335	APOA1	apolipoprotein A1	APOA1
22	337	APOA4	apolipoprotein A4	APOA4
23	338	APOB	apolipoprotein B	APOB
24	6505	SLC1A1	solute carrier family 1 member 1	SLC1A1
25	123264	SLC51B	solute carrier family 51 subunit beta	SLC51B
26	6550	SLC9A3	solute carrier family 9 member A3	SLC9A3
27	6564	SLC15A1	solute carrier family 15 member 1	SLC15A1
28	4547	MTTP	microsomal triglyceride transfer protein	MTTP
29	254439	C11orf86	chromosome 11 open reading frame 86	C11orf86
30	27111	SDCBP2	syndecan binding protein 2	SDCBP2
31	4584	MUC3A	mucin 3A, cell surface associated	MUC3A
32	346606	MOGAT3	monoacylglycerol O-acyltransferase 3	MOGAT3
33	8694	DGAT1	diacylglycerol O-acyltransferase 1	DGAT1
34	27134	TJP3	tight junction protein 3	TJP3
35	338440	ANO9	anoctamin 9	ANO9
36	4640	MYO1A	myosin IA	MYO1A
37	4648	MYO7B	myosin VIIB	MYO7B
38	53841	CDHR5	cadherin related family member 5	CDHR5
39	162417	NAGS	N-acetylglutamate synthase	NAGS
40	27284	SULT1B1	sulfotransferase family 1B member 1	SULT1B1
41	8856	NR1I2	nuclear receptor subfamily 1 group I member 2	NR1I2
42	162461	TMEM92	transmembrane protein 92	TMEM92
43	119467	CLRN3	clarin 3	CLRN3
44	389812	LCN15	lipocalin 15	LCN15
45	84699	CREB3L3	cAMP responsive element binding protein 3 like 3	CREB3L3
46	283375	SLC39A5	solute carrier family 39 member 5	SLC39A5
47	6927	HNF1A	HNF1 homeobox A	HNF1A
48	2859	GPR35	G protein-coupled receptor 35	GPR35
49	11074	TRIM31	tripartite motif containing 31	TRIM31
50	5002	SLC22A18	solute carrier family 22 member 18	SLC22A18
51	11148	HHLA2	HERV-H LTR-associating 2	HHLA2
52	340895	MALRD1	MAM and LDL receptor class A domain containing 1	MALRD1
53	2984	GUCY2C	guanylate cyclase 2C	GUCY2C
54	7103	TSPAN8	tetraspanin 8	TSPAN8
55	7104	TM4SF4	transmembrane 4 L six family member 4	TM4SF4
56	377841	ENTPD8	ectonucleoside triphosphate diphosphohydrolase 8	ENTPD8
57	1015	CDH17	cadherin 17	CDH17
58	1044	CDX1	caudal type homeobox 1	CDX1
59	1045	CDX2	caudal type homeobox 2	CDX2
60	9245	GCNT3	glucosaminyl (N-acetyl) transferase 3, mucin type	GCNT3
61	29785	CYP2S1	cytochrome P450 family 2 subfamily S member 1	CYP2S1
62	3171	FOXA3	forkhead box A3	FOXA3
63	3172	HNF4A	hepatocyte nuclear factor 4 alpha	HNF4A
64	3174	HNF4G	hepatocyte nuclear factor 4 gamma	HNF4G
65	140453	MUC17	mucin 17, cell surface associated	MUC17
66	29881	NPC1L1	NPC1 like intracellular cholesterol transporter 1	NPC1L1
67	9429	ABCG2	ATP binding cassette subfamily G member 2 (Junior blood group)	ABCG2
68	1244	ABCC2	ATP binding cassette subfamily C member 2	ABCC2
69	5357	PLS1	plastin 1	PLS1
70	93432	MGAM2	maltase-glucoamylase 2 (putative)	MGAM2
71	7429	VIL1	villin 1	VIL1
72	54546	RNF186	ring finger protein 186	RNF186
73	79154	DHRS11	dehydrogenase/reductase 11	DHRS11
74	91464	ISX	intestine specific homeobox	ISX
75	1365	CLDN3	claudin 3	CLDN3
76	7512	XPNPEP2	X-prolyl aminopeptidase 2	XPNPEP2
77	56667	MUC13	mucin 13, cell surface associated	MUC13
78	9615	GDA	guanine deaminase	GDA
79	126353	MISP	mitotic spindle positioning	MISP
80	64922	LRRC19	leucine rich repeat containing 19	LRRC19
81	120224	TMEM45B	transmembrane protein 45B	TMEM45B
82	222643	UNC5CL	unc-5 family C-terminal like	UNC5CL
83	388581	C1QTNF12	C1q and TNF related 12	C1QTNF12
84	646625	URAD	ureidoimidazoline (2-oxo-4-hydroxy-4-carboxy-5-) decarboxylase	URAD
85	1577	CYP3A5	cytochrome P450 family 3 subfamily A member 5	CYP3A5
86	54825	CDHR2	cadherin related family member 2	CDHR2
87	54854	FAM83E	family with sequence similarity 83 member E	FAM83E
88	257629	ANKS4B	ankyrin repeat and sterile alpha motif domain containing 4B	ANKS4B
89	58985	IL22RA1	interleukin 22 receptor subunit alpha 1	IL22RA1
90	3706	ITPKA	inositol-trisphosphate 3-kinase A	ITPKA
91	5794	PTPRH	protein tyrosine phosphatase receptor type H	PTPRH
92	91860	CALML4	calmodulin like 4	CALML4
93	91862	MARVELD3	MARVEL domain containing 3	MARVELD3
94	79574	EPS8L3	EPS8 like 3	EPS8L3
95	1755	DMBT1	deleted in malignant brain tumors 1	DMBT1
96	644844	PHGR1	proline, histidine and glycine rich 1	PHGR1
97	284417	TMEM150B	transmembrane protein 150B	TMEM150B
98	1800	DPEP1	dipeptidase 1	DPEP1
99	81693	AMN	amnion associated transmembrane protein	AMN
100	10050	SLC17A4	solute carrier family 17 member 4	SLC17A4
101	10083	USH1C	USH1 protein network component harmonin	USH1C
102	79729	SH3D21	SH3 domain containing 21	SH3D21
103	3960	LGALS4	galectin 4	LGALS4
104	59272	ACE2	angiotensin converting enzyme 2	ACE2
105	1943	EFNA2	ephrin A2	EFNA2
106	4072	EPCAM	epithelial cell adhesion molecule	EPCAM
107	10223	GPA33	glycoprotein A33	GPA33
