# Supplementary material for: SMAD1 Is Dispensable for CDX2 Induction but Required for the Repression of Ectopic Small-Intestinal Gene Expression in Human-Pluripotent-Stem-Cell-Derived Colonic Organoids
Source: MDPI journal article supplement (doi:10.3390/organoids2040015), 2023-11-14
Supplement: s1 [file s1 › Supplementary Table S2. UP in WT co-expression analysis.xlsx]

## Sheet: d6d7a27b-3a3b-4ae2-98ce-c611980
Category	ID	Name	Source	p-value	q-value Bonferroni	q-value FDR B&H	q-value FDR B&Y	Hit Count in Query List	Hit Count in Genome	Hit in Query List
Coexpression Atlas	PCBC_ratio_MESO-30_from-OSKM - NLT_vs_MESO-30_from-ESC_cfr-2X-p05	Mesoderm Day 30-reprogram_OSKM - NLT_vs_Mesoderm Day 30-reprogram_NA-Confounder_removed-fold2.0_adjp0.05	PCBC_AltAnalyze	9.799e-41	3.841e-37	1.28e-37	1.133e-36	74	501	TPM1,TPM2,CDKN2A,TRAF5,PENK,ACTA2,HMMR,TRIM22,EHD3,FZD1,MYL9,EVA1A,FHL1,FST,PLN,MARCHF4,PCDH10,CNN1,CAP2,RBM38,FOXC1,TOM1L2,COL4A1,JCAD,COL6A3,COL8A1,SFRP1,MRAS,FN1,TNC,SESN3,CCDC80,CRABP2,CRIP2,ARL4D,POSTN,ARHGDIB,MOXD1,NKD1,GLIPR2,RASL11B,ATP2B4,DKK3,H19,MYH11,ADAM19,MYLK,INHBA,GDF10,PTHLH,BGN,ST6GAL2,ANOS1,FBXL7,NUAK1,SULF1,NTM,CCDC3,KCNMB1,KCNMB4,GLIPR1,CACNA1C,KRT7,NIPAL4,EDNRA,ZNF503,MSRB3,…
Coexpression Atlas	PCBC_ratio_MESO-30 fibroblast_vs_MESO-30 blastocyst_cfr-2X-p05	MESO-30 fibroblast_vs_MESO-30 blastocyst-Confounder_removed-fold2.0_adjp0.05	PCBC_AltAnalyze	9.799e-41	3.841e-37	1.28e-37	1.133e-36	74	501	TPM1,TPM2,CDKN2A,TRAF5,PENK,ACTA2,HMMR,TRIM22,EHD3,FZD1,MYL9,EVA1A,FHL1,FST,PLN,MARCHF4,PCDH10,CNN1,CAP2,RBM38,FOXC1,TOM1L2,COL4A1,JCAD,COL6A3,COL8A1,SFRP1,MRAS,FN1,TNC,SESN3,CCDC80,CRABP2,CRIP2,ARL4D,POSTN,ARHGDIB,MOXD1,NKD1,GLIPR2,RASL11B,ATP2B4,DKK3,H19,MYH11,ADAM19,MYLK,INHBA,GDF10,PTHLH,BGN,ST6GAL2,ANOS1,FBXL7,NUAK1,SULF1,NTM,CCDC3,KCNMB1,KCNMB4,GLIPR1,CACNA1C,KRT7,NIPAL4,EDNRA,ZNF503,MSRB3,…
Coexpression Atlas	PCBC_ratio_MESO-30_from-plasmid_vs_MESO-30_from-ESC_cfr-2X-p05	Mesoderm Day 30-method_plasmid_vs_Mesoderm Day 30-method_NA-Confounder_removed-fold2.0_adjp0.05	PCBC_AltAnalyze	9.799e-41	3.841e-37	1.28e-37	1.133e-36	74	501	TPM1,TPM2,CDKN2A,TRAF5,PENK,ACTA2,HMMR,TRIM22,EHD3,FZD1,MYL9,EVA1A,FHL1,FST,PLN,MARCHF4,PCDH10,CNN1,CAP2,RBM38,FOXC1,TOM1L2,COL4A1,JCAD,COL6A3,COL8A1,SFRP1,MRAS,FN1,TNC,SESN3,CCDC80,CRABP2,CRIP2,ARL4D,POSTN,ARHGDIB,MOXD1,NKD1,GLIPR2,RASL11B,ATP2B4,DKK3,H19,MYH11,ADAM19,MYLK,INHBA,GDF10,PTHLH,BGN,ST6GAL2,ANOS1,FBXL7,NUAK1,SULF1,NTM,CCDC3,KCNMB1,KCNMB4,GLIPR1,CACNA1C,KRT7,NIPAL4,EDNRA,ZNF503,MSRB3,…
Coexpression Atlas	PCBC_ratio_EB_vs_SC_cfr-2X-p05	Embryoid Body Cells_vs_Pluripotent Stem Cells-Confounder_removed-fold2.0_adjp0.05	PCBC_AltAnalyze	9.995e-33	3.918e-29	9.795e-30	8.67e-29	123	1796	CPA4,TPM1,EPHB2,TPM2,TTYH1,MAP2,CADM4,PENK,ACTA2,FAM89B,PLPPR3,NREP,MEIS2,FZD1,FBN2,MYL9,ARHGAP29,AMOTL2,MMP11,FHL1,FST,PCDH10,LTBP4,MEX3B,CNN1,CAP2,FOXC1,TOM1L2,COL4A1,COL6A3,KLF11,LRP12,CCDC74B,COL9A2,LMF1,COL12A1,MRAS,COL13A1,FN1,SEPTIN5,TNC,SESN3,ID3,DPYSL4,APLP1,CCDC80,CRABP2,IFIT1,CRIP2,ARL4D,SMTN,WDR47,RND3,POSTN,ARHGDIB,LRRN3,MOXD1,NKD1,DKK1,IGFBP7,ZKSCAN1,SCMH1,GLIPR2,CCN2,LIMCH1,SNCG,IF…
Coexpression Atlas	gudmap_dev gonad_e13.5_M_InterstitTestis_Sma_1000	dev gonad_e13.5_M_InterstitTestis_Sma_top-relative-expression-ranked_1000	Gudmap Mouse ST 1.0	1.489e-32	5.835e-29	1.167e-29	1.033e-28	80	777	TPM1,TPM2,VGLL3,MAP2,ACTA2,MCC,ADCY2,TUBB4A,FBN2,MEX3A,MYL9,HOXD11,ANLN,MMP11,LTBP4,MEX3B,CNN1,COL4A1,COL6A3,TEAD2,SFRP1,FN1,RGS5,TNC,SGCD,OLFML2B,SOSTDC1,CRABP2,CDC42EP3,SMTN,RND3,POSTN,LRRN3,NKD1,DKK1,IGFBP7,NSG1,GLIPR2,PDE5A,PRKG1,ATP2B4,MYH11,HTRA1,ARHGAP24,ADAM19,MYLK,INHBA,PARD6G,P4HA3,DENND2B,BGN,CYRIA,NUAK1,OLFML1,RBMS3,SULF1,NFIB,NRK,ARHGEF9,ZNF558,NNAT,DNMT3A,EHBP1,KRT7,ZEB1,CALD1,UACA,…
Coexpression	MM1335	LIU_OVARIAN_CANCER_TUMORS_AND_XENOGRAFTS_XDGS_DN	M2:CGP: Chemical and Genetic Perturbations	9.267e-32	8.638e-28	8.638e-28	8.394e-27	101	1548	VGLL3,RAMP2,RHOJ,ACTA2,MCC,HLX,ACTG2,PLPPR3,RFTN2,ABCA9,MEIS2,FZD1,SEMA5B,ARHGAP31,ALDH1A3,MMP11,FST,PLN,KIF17,FKBP1A,PLS3,CNTN1,PDZD4,PCYT1B,COL4A1,JCAD,COL6A3,COL8A1,SFRP1,COL12A1,FN1,RGS5,SGCD,OLFML2B,DPYSL4,CCDC80,POSTN,ARHGDIB,LRRN3,MOXD1,SCUBE2,IGFBP7,GLIPR2,ITPRIP,PDE5A,CCN2,PRKG1,MIAT,DKK3,DKK2,DCHS2,TCEAL7,MYH11,HTRA1,ARHGAP24,SPOCK1,INHBA,DOCK11,GAS1,GBP1,LAMP5,MEIS3,PDE10A,PTHLH,BGN,CY…
Coexpression Atlas	PCBC_ratio_EB blastocyst_vs_EB bone marrow_cfr-2X-p05	EB blastocyst_vs_EB bone marrow-Confounder_removed-fold2.0_adjp0.05	PCBC_AltAnalyze	4.714e-31	1.848e-27	3.08e-28	2.726e-27	54	345	TTYH1,MAP2,MCAM,E2F7,PLPPR3,RFTN2,REEP2,SBK1,TUBB3,TUBB4A,SEMA5B,CPT1C,MEX3B,FOXC1,COL8A1,COL9A1,COL9A2,COL12A1,SEPTIN5,OLFML2B,DPYSL4,CRMP1,RND3,RASL11B,CCN2,IL17RD,MIAT,FAM131B,DKK2,MYCL,INHBA,TUBB2B,AIF1L,DCX,BGN,SULT1E1,NUAK1,TUBA1A,SYT11,SULF1,ZNF558,NKAIN1,GPC2,TMEM231,CTXN1,DUSP4,STMN1,THBS2,MSANTD3-TMEFF1,INA,HMCN1,TPBG,EPHA3,ARHGAP19
Coexpression Atlas	GSM777067_500	Stromal Cells, St.31-38-44-.SLN, CD45- gp38- CD31- CD44-, Lymph Node, avg-2	Immgen.org, GSE15907	1.969e-29	7.718e-26	1.103e-26	9.759e-26	59	453	TPM1,TPM2,RHOJ,PENK,ACTA2,MCAM,ACTG2,NREP,MYL9,ARHGAP29,FHL1,FST,PLN,LTBP4,PLS3,SDC1,CNN1,COL4A1,COL6A3,COL12A1,FN1,RGS5,TNC,OLFML2B,ID3,CCDC80,CRIP2,POSTN,IGFBP7,PDE5A,CCN2,PRKG1,SNCG,DCBLD2,MYADM,MYH11,HTRA1,GAS1,GDF10,DENND2B,BGN,OLFML2A,RBMS3,NFIB,CCDC3,SGCE,TAGLN,DPYSL3,SASH1,CALD1,ADAMTS5,RGS4,EDNRA,MSRB3,THBS2,LMNA,TJP1,RBFOX2,EPHA3
Coexpression	M39209	HAY_BONE_MARROW_STROMAL	C8: Cell Type Signature	7.743e-29	7.218e-25	2.538e-25	2.467e-24	68	767	VGLL3,EYA4,RAMP2,RHOJ,MCC,RFTN2,TENM2,ABCA9,MEIS2,FZD1,CSRNP3,HOXD11,ALDH1A3,AMOTL2,FHL1,FST,PLN,PLS3,CNTN1,FOXC1,FOXC2,COL4A1,COL6A3,TEAD2,SFRP1,COL12A1,FN1,TNC,NLGN4Y,OLFML2B,ID3,CCDC80,RND3,IGFBP7,CCN2,LIMCH1,SNCG,HTRA1,PCDHB5,GAS1,C11orf87,NCAM2,DENND2B,BGN,OLFML2A,FBXL7,OLFML1,RBMS3,SULF1,NFIB,SGCE,TAGLN,DPYSL3,CALD1,PCDHB10,EDNRA,ZNF503,TBX18,THBS2,LMNA,FRMD6,TJP1,CCBE1,SERTAD4,LTBP2,RBFOX2…
Coexpression	M45001	LIU_OVARIAN_CANCER_TUMORS_AND_XENOGRAFTS_XDGS_DN	C2:CGP: Chemical and Genetic Perturbations	8.169e-29	7.615e-25	2.538e-25	2.467e-24	102	1714	VGLL3,RAMP2,RHOJ,ACTA2,MCC,HLX,ACTG2,PLPPR3,RFTN2,TRIM22,ABCA9,MEIS2,FZD1,SEMA5B,ARHGAP31,ALDH1A3,MMP11,FST,PLN,KIF17,PLS3,CNTN1,PDZD4,PCYT1B,COL4A1,JCAD,COL6A3,COL8A1,SFRP1,COL12A1,FN1,RGS5,SGCD,OLFML2B,DPYSL4,CCDC80,POSTN,ARHGDIB,LRRN3,MOXD1,SCUBE2,IGFBP7,GLIPR2,ITPRIP,PDE5A,CCN2,PRKG1,MIAT,DKK3,DKK2,H19,DCHS2,TCEAL7,MYH11,HTRA1,ARHGAP24,SPOCK1,INHBA,DOCK11,GAS1,LAMP5,MEIS3,PDE10A,PTHLH,BGN,CYR…
Coexpression	M5930	HALLMARK_EPITHELIAL_MESENCHYMAL_TRANSITION	H: Hallmark	2.323e-28	2.165e-24	5.414e-25	5.261e-24	38	200	TPM1,TPM2,ACTA2,FBN2,MYL9,SDC1,CAP2,FOXC2,COL4A1,COL6A3,SFRP1,COL12A1,FN1,TNC,SGCD,APLP1,POSTN,DKK1,CCN2,PRSS2,HTRA1,MYLK,SPOCK1,INHBA,GAS1,PTHLH,BGN,NTM,TAGLN,GPC1,GLIPR1,DPYSL3,CALD1,NT5E,RGS4,THBS2,GREM1,CDH2
Coexpression	M39175	MURARO_PANCREAS_MESENCHYMAL_STROMAL_CELL	C8: Cell Type Signature	2.49e-25	2.321e-21	4.642e-22	4.511e-21	60	681	TPM1,TPM2,ACTA2,MCC,NREP,MMP11,MAP4K4,PLS3,COL4A1,JCAD,COL6A3,COL8A1,SFRP1,COL12A1,MRAS,FN1,TNC,SGCD,TUBB,ID3,CCDC80,AKAP12,RND3,POSTN,NKD1,IGFBP7,ITPRIP,CCN2,PRKG1,DCBLD2,DKK3,MYADM,HTRA1,ADAM19,MYLK,SPOCK1,INHBA,P4HA3,LAMP5,MARCKSL1,BGN,OLFML2A,SULF1,ZEB1,SASH1,CALD1,UACA,PLXDC1,NT5E,EDNRA,THBS2,LMNA,HMCN1,CDK2AP1,FRMD6,ZNF532,LTBP2,GREM1,PLEKHO1,TPBG
Coexpression	M39167	GAO_LARGE_INTESTINE_ADULT_CJ_IMMUNE_CELLS	C8: Cell Type Signature	3.724e-25	3.471e-21	5.785e-22	5.622e-21	52	505	TPM2,RAMP2,RHOJ,ACTA2,MCAM,CSMD3,MEIS2,MYL9,ARHGAP29,ALDH1A3,MMP11,FHL1,FST,COL4A1,JCAD,COL6A3,SFRP1,COL12A1,COL13A1,RGS5,SGCD,CCDC80,CRIP2,POSTN,LRRN3,SCUBE2,IGFBP7,NSG1,CYYR1,LIMCH1,DKK3,HTRA1,ADAM19,MEIS3,BGN,OLFML2A,FBXL7,NUAK1,RBMS3,SULF1,SGCE,IFI44L,DPYSL3,ZEB1,CALD1,ADAMTS5,EDNRA,MSRB3,FRMD6,LTBP2,TNFAIP2,LY6E
Coexpression Atlas	gudmap_dev gonad_e13.5_M_InterstitFLeydig_MafB_1000	dev gonad_e13.5_M_InterstitFLeydig_MafB_top-relative-expression-ranked_1000	Gudmap Mouse ST 1.0	4.332e-25	1.698e-21	2.123e-22	1.879e-21	70	773	TPM1,VGLL3,RHOJ,PENK,ACTA2,MCC,RFTN2,ADCY2,TUBB3,FBN2,MEX3A,MYL9,HOXD11,ANLN,PGAP1,RAD54B,SLITRK6,LTBP4,CNN1,COL4A1,COL6A3,SFRP1,FN1,OLFML2B,SOSTDC1,CLDND1,CCDC80,RND3,POSTN,LRRN3,IGFBP7,GLIPR2,UHRF1,PDE5A,ATP2B4,MYADM,MYH11,HTRA1,ARHGAP24,ADAM19,MYLK,INHBA,P4HA3,DENND2B,BGN,NUAK1,OLFML1,SULF1,NFIB,NRK,ARHGEF9,ZNF558,NNAT,DNMT3A,CALD1,UACA,PLXDC1,NT5E,PCDHB10,ADAMTS5,LPAR1,EDNRA,TGFB2,SLC7A8,HMCN…
Coexpression Atlas	facebase_RNAseq_e14.5_palate_poster_proximal_ERK2_WT_2500	facebase_RNAseq_e14.5_palate_poster_proximal_ERK2_WT_2500	Gudmap RNAseq	7.019e-25	2.752e-21	3.057e-22	2.706e-21	106	1685	IGSF8,TPM2,EPHB6,TTYH1,EYA4,PDE4D,CTTNBP2,MAP2,TRPC4,PENK,ACTA2,MCAM,MCC,HLX,PLPPR3,RFTN2,NREP,ADCY2,PICALM,ABCA9,MEIS2,FZD1,FBN2,KIAA1549L,MYL9,SEMA5B,ARHGAP31,CPT1C,SLITRK6,MMP11,COL4A1,JCAD,COL6A3,COL8A1,LMF1,SFRP1,COL12A1,MRAS,FN1,TNC,OLFML2B,WNT7A,SOSTDC1,ZFP14,APLP1,CCDC80,POSTN,ARHGDIB,NKD1,IGFBP7,RAB15,PRKG1,DKK3,DKK2,H19,MYH11,HTRA1,B4GALNT1,ARHGAP24,INHBA,P4HA3,TUBB2B,BRINP1,GDF10,BGN,N…
Coexpression	M2129	CHICAS_RB1_TARGETS_CONFLUENT	C2:CGP: Chemical and Genetic Perturbations	1.709e-24	1.593e-20	2.275e-21	2.211e-20	54	566	TPM1,EPHB2,TPM2,CDKN2A,VGLL3,RHOJ,ACTA2,ACTG2,MCM5,NREP,FBN2,MYL9,EVA1A,PKM,ALDH1A3,CNN1,FOXC2,SFRP1,FN1,SGCD,TUBB,SESN3,CCDC80,CDC42EP3,POSTN,MOXD1,UHRF1,PDE5A,IL17RD,ATP2B4,ADAM19,MYLK,SPOCK1,GBP1,TUBB2B,SYNC,MELK,BGN,OLFML2A,TUBA1A,SULF1,STMN3,SYT1,TAGLN,GPC1,DPYSL3,UACA,MAMLD1,ADAMTS8,MSRB3,LMNA,SLC7A5,LTBP2,LY6E
Coexpression	M39063	MANNO_MIDBRAIN_NEUROTYPES_HNBM	C8: Cell Type Signature	5.354e-24	4.991e-20	6.239e-21	6.062e-20	40	295	MAP2,CSMD3,SBK1,TUBB3,TUBB4A,CSRNP3,DPYSL4,POU3F1,CDC42EP3,CRMP1,RND3,SHF,NSG1,DLL3,MIAT,GAS2,TUBB2B,DCX,ST6GAL2,CYRIA,TUBA1A,NKAIN1,GPC2,GRIN3A,NNAT,PCBP4,NOVA1,DPYSL3,STMN1,ADAMTS5,TAMALIN,RGS4,MSANTD3-TMEFF1,INA,CCBE1,VASH2,PAK3,PBX3,EPB41,RBFOX2
Coexpression Atlas	gudmap_dev gonad_e11.5_F_GonMes_Sma_1000	dev gonad_e11.5_F_GonMes_Sma_top-relative-expression-ranked_1000	Gudmap Mouse ST 1.0	8.07e-24	3.164e-20	3.164e-21	2.8e-20	72	858	TPM1,MAP2,MCC,ADCY2,MEIS2,TUBB4A,MYL9,ARIH2,AMOTL2,MMP11,FST,PLS3,MEX3B,CNN1,KLF11,TEAD2,SFRP1,MRAS,FN1,RGS5,TNC,PODXL,WT1,SESN3,CCDC80,STIL,CRABP2,CDC42EP3,RND3,POSTN,NKD1,NSG1,OSR1,GLIPR2,UHRF1,RASL11B,CCN2,PRKG1,H19,GBP1,P4HA3,TUBB2B,BRINP1,ZC4H2,DENND2B,NEFL,NUAK1,OLFML1,SULF1,NFIB,NRK,ZNF558,MAFB,NNAT,TAGLN,WASF1,KRT7,CALD1,PLXDC1,DUSP4,ADAMTS5,LPAR1,SDAD1,EDNRA,LMNA,HMCN1,FRMD6,EGR2,CCBE1,V…
Coexpression Atlas	facebase_RNAseq_e14.5_palate_poster_distal_ERK2_WT_2500	facebase_RNAseq_e14.5_palate_poster_distal_ERK2_WT_2500	Gudmap RNAseq	1.064e-23	4.171e-20	3.792e-21	3.356e-20	98	1520	TPM2,EPHB6,EYA4,PDE4D,CTTNBP2,MAP2,TRPC4,PENK,RFTN2,KATNAL1,NREP,ADCY2,ABCA9,FZD1,FBN2,MYL9,SEMA5B,SLITRK6,MMP11,FHL1,PLN,LTBP4,PDZD4,JCAD,COL6A3,COL8A1,SFRP1,COL12A1,MRAS,FN1,TNC,OLFML2B,WNT7A,SOSTDC1,CCDC80,POSTN,ARHGDIB,IGFBP7,OSR1,RASL11B,PRKG1,DKK3,DKK2,MYH11,HTRA1,ARHGAP24,MYLK,INHBA,DOCK11,GAS2,P4HA3,BRINP1,PDE10A,GDF10,DCX,BGN,OLFML2A,NEFL,ST6GAL2,OLFML1,RBMS3,SULF1,NFIB,STMN3,NTM,NRK,CCD…
Coexpression Atlas	gudmap_dev gonad_e12.5_F_VasAssocMesStromOvary_Sma_1000	dev gonad_e12.5_F_VasAssocMesStromOvary_Sma_top-relative-expression-ranked_1000	Gudmap Mouse ST 1.0	1.325e-23	5.194e-20	4.004e-21	3.544e-20	69	797	TPM1,MAP2,CADM4,ACTA2,MCC,ADCY2,TUBB4A,FBN2,MYL9,ARHGAP29,MMP11,FST,MEX3B,CNN1,CAP2,COL6A3,TEAD2,SFRP1,COL12A1,FN1,RGS5,SGCD,PODXL,OLFML2B,WT1,SESN3,CCDC80,CRABP2,POSTN,NKD1,SCMH1,NSG1,OSR1,GLIPR2,UHRF1,PRKG1,H19,MYH11,INHBA,GBP1,PARD6G,P4HA3,ZC4H2,DENND2B,BGN,CYRIA,OLFML1,SULF1,NFIB,NRK,ZNF558,MAFB,WASF1,DNMT3A,KRT7,CALD1,PLXDC1,EDNRA,TGFB2,SEMA3D,HMCN1,FRMD6,EGR2,CCBE1,PBX3,CDH2,CDH12,EPHA3,ARM…
Coexpression Atlas	gudmap_dev gonad_e11.5_F_GonMes_Sma_k4_1000	dev gonad_e11.5_F_GonMes_Sma_k-means-cluster#4_top-relative-expression-ranked_1000	Gudmap Mouse ST 1.0	1.328e-23	5.205e-20	4.004e-21	3.544e-20	45	327	TPM1,MAP2,MCC,ADCY2,MEIS2,TUBB4A,AMOTL2,MEX3B,CNN1,TEAD2,SFRP1,RGS5,TNC,CRABP2,RND3,POSTN,NKD1,NSG1,OSR1,GLIPR2,UHRF1,RASL11B,PRKG1,P4HA3,ZC4H2,NEFL,NUAK1,OLFML1,NFIB,NRK,ZNF558,MAFB,NNAT,TAGLN,KRT7,CALD1,ADAMTS5,LPAR1,EDNRA,LMNA,HMCN1,EGR2,CCBE1,VASH2,PBX3
Coexpression	M17471	SCHUETZ_BREAST_CANCER_DUCTAL_INVASIVE_UP	C2:CGP: Chemical and Genetic Perturbations	6.041e-23	5.631e-19	6.257e-20	6.08e-19	42	352	RCBTB2,NREP,TRIM22,MEIS2,FBN2,MYL9,MMP11,PLN,MAP4K4,PLS3,COL4A1,JCAD,COL6A3,FN1,SGCD,OLFML2B,POSTN,IGFBP7,CCN2,HTRA1,ADAM19,SPOCK1,INHBA,GAS1,GBP1,PDE10A,SEPTIN6,BGN,NUAK1,OLFML1,SULF1,MAFB,GLIPR1,DPYSL3,ZEB1,CALD1,PLXDC1,RGS4,EDNRA,THBS2,TLE4,GREM1
Coexpression Atlas	PCBC_ratio_EB_vs_SC_1000	ratio_EmbryoidBody_vs_StemCell_top-relative-expression-ranked_1000	PCBC	1.192e-22	4.672e-19	3.337e-20	2.954e-19	76	994	CPA4,CDKN2A,EYA4,RHOJ,PENK,ACTA2,HLX,ACTG2,RFTN2,TENM2,MEIS2,ARHGAP29,SLITRK6,PLN,PCDH10,FOXC1,FOXC2,TOM1L2,JCAD,ISLR2,COL6A3,COL8A1,COL12A1,FN1,TNC,SGCD,WNT7A,WT1,SOSTDC1,CCDC80,CRIP2,POSTN,ARHGDIB,LRRN3,NKD1,DKK1,IGFBP7,OSR1,DKK2,H19,SERPINB7,ARHGAP24,INHBA,GAS1,GAS2,GATA2,GATA3,GBP1,P4HA3,GDF10,DCX,PTHLH,BGN,SULT1E1,OLFML1,RBMS3,SULF1,CCDC3,DLX2,GLIPR1,NIPAL4,ZEB1,PCDHGB6,TFAP2A,RGS4,EDNRA,ZNF…
Coexpression	M9192	CHARAFE_BREAST_CANCER_LUMINAL_VS_MESENCHYMAL_DN	C2:CGP: Chemical and Genetic Perturbations	1.816e-22	1.693e-18	1.693e-19	1.645e-18	47	465	TPM1,EYA4,ACTA2,MCAM,KATNAL1,PICALM,ANLN,EVA1A,FHL1,FST,MAP4K4,FOXC1,COL4A1,COL6A3,BIN1,SFRP1,COL13A1,TUBB,STIL,AKAP12,IGFBP7,GLIPR2,ITPRIP,DCBLD2,DKK3,HTRA1,MYLK,INHBA,SEPTIN6,RBMS3,BUB1,KIF3C,GLIPR1,EHBP1,ZEB1,CALD1,NT5E,ADAMTS5,LPAR1,RGS4,MSRB3,TGFB2,CCBE1,LTBP2,UBASH3B,TOX2,PHLDB2
Coexpression Atlas	gudmap_developingKidney_e15.5_Ureteral Smooth Musc_1000	DevelopingKidney_e15.5_Ureteral Smooth Musc_emap-28812_top-relative-expression-ranked_1000	Gudmap Mouse MOE430.2	2.743e-22	1.075e-18	7.168e-20	6.345e-19	66	772	TPM2,TRAF5,EYA4,PDE4D,RHOJ,PENK,ACTA2,ACTG2,MCM5,ADCY2,MEIS2,FZD1,FBN2,KIAA1549L,MYL9,FHL1,FST,CNN1,CAP2,CNTN1,COL6A3,COL9A1,POU3F1,CCDC80,PREPL,AKAP12,POSTN,MOXD1,NKD1,SCMH1,GIGYF2,PDE5A,CCN2,ATP2B4,DKK3,MYH11,MYLK,GATA2,GBP1,GDF10,CYRIA,RBMS3,SULF1,NFIB,ARHGEF9,KCNMB1,SYT1,GRIN3A,TAGLN,ST8SIA4,WASF1,GLIPR1,EHBP1,NIPAL4,CALD1,NT5E,ADAMTS8,MSRB3,TBX18,THBS2,LMNA,R3HDM1,PBX3,RBFOX2,TPBG,RASD2
Coexpression	M45662	HE_LIM_SUN_FETAL_LUNG_C0_ACTC_POS_SMC_CELL	C8: Cell Type Signature	4.539e-22	4.231e-18	3.846e-19	3.738e-18	52	589	TRAF5,RHOJ,CADM4,ACTG2,FAM89B,MEIS2,FBN2,UBE2H,CSRNP3,EVA1A,MMP11,FST,CNN1,CAP2,RBM38,MRAS,OLFML2B,CRABP2,CDC42EP3,NKD1,ISG15,NSG1,CNTNAP3B,MYH11,ADAM19,GAS2,TUBB2B,SYNC,MEIS3,AIF1L,DCX,ST6GAL2,ANOS1,FBXL7,NTM,KCNMB1,WASF1,CTXN1,GLIPR1,CACNA1C,NIPAL4,ZEB1,ADAMTS8,MSRB3,PLEKHG4B,C1orf198,TLE4,HSD17B14,CDH2,PHLDB2,TPBG,RASD2
Coexpression Atlas	gudmap_dev lower uro neuro_e15.5_PelvicGanglion_Sox10_1000	dev lower uro neuro_e15.5_PelvicGanglion_Sox10_top-relative-expression-ranked_1000	Gudmap Mouse ST 1.0	4.802e-22	1.882e-18	1.176e-19	1.041e-18	64	735	TPM2,EYA4,PENK,ACTA2,CNTNAP3,ACTG2,CSMD3,MEIS2,FABP5,TUBB3,TUBB4A,FBN2,PCDH10,CNN1,COL6A3,COL8A1,COL12A1,FN1,RGS5,TNC,CRABP2,CRMP1,POSTN,MOXD1,IGFBP7,NSG1,OSR1,GLIPR2,PDE5A,SNCG,SNRPN,GATA3,P4HA3,TUBB2B,BRINP1,GDF10,DCX,SEPTIN6,NEFL,ST6GAL2,TSPAN17,OLFML1,TUBA1A,RBMS3,SYT11,SULF1,STMN3,NRK,SYT1,ASTN2,GRIN3A,NNAT,NOVA1,DPYSL3,PSCA,ADAMTS5,LCP1,LPAR1,RGS4,EDNRA,THBS2,INA,HMCN1,ARMH4
Coexpression Atlas	gudmap_dev gonad_e11.5_M_GonadVasMes_Flk_1000	dev gonad_e11.5_M_GonadVasMes_Flk_top-relative-expression-ranked_1000	Gudmap Mouse ST 1.0	5.203e-22	2.04e-18	1.2e-19	1.062e-18	68	827	TPM1,MCC,ADCY2,MEIS2,FBN2,MEX3A,MYL9,CSRNP3,ANLN,PGAP1,ARHGAP29,SLITRK6,PLS3,MEX3B,CAP2,FOXC2,COL6A3,SFRP1,MRAS,RGS5,TNC,PODXL,WT1,CCDC80,CRABP2,RND3,POSTN,ARHGDIB,NKD1,ZNF43,NSG1,OSR1,UHRF1,PRKG1,DCBLD2,ATP2B4,H19,ADAM19,DENND2B,BGN,OLFML1,RBMS3,SULF1,NFIB,NRK,BUB1,ARHGEF9,ZNF558,MAFB,NNAT,WASF1,DNMT3A,KRT7,CALD1,LCP1,LPAR1,SDAD1,EDNRA,TGFB2,SEMA3D,HMCN1,EGR2,VASH2,PBX3,CDH2,PLEKHO1,PHLDB2,ARHGA…
Coexpression Atlas	gudmap_developingLowerUrinaryTract_e14.5_ urethra_1000	DevelopingLowerUrinaryTract_e14.5_ urethra_emap-30892_top-relative-expression-ranked_1000	Gudmap Mouse MOE430.2	5.981e-22	2.344e-18	1.234e-19	1.092e-18	67	806	EPHB2,TRAF5,EYA4,CTTNBP2,ATXN7L1,BACH2,ACTA2,ACTG2,TRIM29,TENM2,PROM2,SLITRK6,PCDH10,CNN1,CAP2,FOXC1,SEMA3F,COL8A1,COL9A1,TNC,POGK,DPYSL4,CRMP1,MOXD1,CELF1,ZKSCAN1,CYYR1,OSR1,GIGYF2,PDE5A,DKK3,TCEAL7,MYH11,MYLK,SPOCK1,GAS2,GATA3,PARD6G,C11orf87,NCAM2,MARCKSL1,BRINP1,GDF10,DCX,NEFL,CYRIA,SULF1,STMN3,NRK,ARHGEF9,GRIN3A,ST8SIA4,WASF1,DPYSL3,ADAMTS5,TFAP2A,EDNRA,MSRB3,TGFB2,SEMA3D,HMCN1,VASH2,ENTPD3,…
Coexpression Atlas	DevelopingLowerUrinaryTract_e14.5_ urethra_emap-30902_1000	DevelopingLowerUrinaryTract_e14.5_ urethra_emap-30902_top-relative-expression-ranked_1000	Gudmap Mouse MOE430.2	5.981e-22	2.344e-18	1.234e-19	1.092e-18	67	806	TRAF5,EYA4,CTTNBP2,ACTA2,ACTG2,TRIM29,TENM2,TUBB3,MYL9,CSRNP3,PROM2,EVA1A,TBC1D14,SLITRK6,FST,PCDH10,MEX3B,CNN1,CAP2,SEMA3F,COL8A1,TNC,PREPL,CRMP1,MOXD1,CELF1,ZKSCAN1,CYYR1,LYPD3,GIGYF2,PDE5A,PRKG1,DCBLD2,DKK3,DKK2,MYCL,MYH11,MYLK,SPOCK1,GAS2,GATA3,PARD6G,DCX,NEFL,ST6GAL2,CYRIA,SULF1,STMN3,NRK,ARHGEF9,ST8SIA4,NOVA1,DPYSL3,CALD1,TFAP2A,LPAR1,EDNRA,MSRB3,SEMA3D,INA,HMCN1,TLE4,ENTPD3,PAK3,PSME3,RBFO…
Coexpression Atlas	gudmap_dev gonad_e12.5_M_InterstitTestis_Sma_1000	dev gonad_e12.5_M_InterstitTestis_Sma_top-relative-expression-ranked_1000	Gudmap Mouse ST 1.0	1.179e-21	4.621e-18	2.31e-19	2.045e-18	66	793	TPM1,MAP2,ACTA2,MCC,HMMR,TUBB4A,HOXD11,ANLN,MMP11,LTBP4,ISLR2,COL6A3,SFRP1,MRAS,FN1,TNC,SGCD,OLFML2B,WT1,SOSTDC1,CRABP2,SMTN,RND3,POSTN,LRRN3,DKK1,IGFBP7,NSG1,GLIPR2,UHRF1,PDE5A,PRKG1,ATP2B4,ADAM19,INHBA,P4HA3,ZC4H2,DENND2B,BGN,NUAK1,OLFML1,SULF1,NRK,NECTIN1,BUB1,ARHGEF9,ZNF558,NNAT,DNMT3A,KRT7,ZEB1,CALD1,PLXDC1,DTNA,MAMLD1,ADAMTS5,LPAR1,EDNRA,TGFB2,SEMA3D,HMCN1,EGR2,PAK3,PWWP3B,EPHA3,ARMH4
Coexpression Atlas	Facebase_RNAseq_e10.5_Olfactory Pit_1000	FacebaseRNAseq_e10.5_Olfactory Pit_top-relative-expression-ranked_1000	FaceBase_RNAseq	1.249e-21	4.896e-18	2.332e-19	2.064e-18	74	984	IGSF8,EYA4,MAP2,TENM2,ADCY2,MEIS2,TUBB3,TUBB4A,KIAA1549L,SEMA5B,PROM2,ALDH1A3,SLITRK6,MMP11,LTBP4,RBM38,COL6A3,COL8A1,CHODL,RGS5,TNC,SOSTDC1,DPYSL4,CCDC80,CRABP2,SP110,POSTN,IGFBP7,ZNF43,OSR1,RASL11B,RAB15,IL17RD,ATP2B4,DKK2,MYCL,CCP110,HTRA1,INHBA,GATA3,P4HA3,NCAM2,BRINP1,DCX,COL24A1,OLFML1,NFIB,STMN3,NRK,CCDC3,NECTIN1,EXOC6B,KCNMB4,NNAT,PCBP4,SHANK1,CACNA1C,KRT7,DPYSL3,DTNA,DUSP4,MAMLD1,TGFB2,S…
Coexpression	M39104	ZHONG_PFC_C3_MICROGLIA	C8: Cell Type Signature	1.381e-21	1.287e-17	1.073e-18	1.043e-17	47	488	PENK,CSMD3,TENM2,ADCY1,REEP2,TUBB3,TUBB4A,KIAA1549L,CSRNP3,CAP2,AGAP3,LRP12,DPYSL4,POU3F1,CDC42EP3,PREPL,CRIP2,CRMP1,WDR47,LRRN3,NSG1,RAB15,LIMCH1,C11orf87,TUBB2B,MARCKSL1,DCX,NEFL,CYRIA,TUBA1A,NFIB,STMN3,DLX2,KIF3C,PCBP4,WASF1,CTXN1,GPC1,CACNA1C,DPYSL3,SASH1,ACTR3B,NCS1,INA,CCBE1,LY6H,CDH2
Coexpression Atlas	gudmap_dev gonad_e13.5_F_VascAssocMesenchStromOvary_Sma_1000	dev gonad_e13.5_F_VascAssocMesenchStromOvary_Sma_top-relative-expression-ranked_1000	Gudmap Mouse ST 1.0	1.547e-21	6.064e-18	2.757e-19	2.44e-18	66	797	MAP2,RHOJ,ACTA2,MCC,FBN2,MYL9,ARHGAP29,MMP11,FST,LTBP4,CAP2,COL6A3,SFRP1,COL12A1,MRAS,FN1,RGS5,SGCD,PODXL,OLFML2B,WT1,SESN3,CCDC80,CRABP2,POSTN,NKD1,SCMH1,NSG1,OSR1,PRKG1,ATP2B4,H19,MYH11,HTRA1,INHBA,GBP1,PARD6G,P4HA3,DENND2B,BGN,OLFML1,RBMS3,SULF1,NFIB,NRK,ZNF558,MAFB,WASF1,DNMT3A,KRT7,ZEB1,CALD1,PLXDC1,LPAR1,EDNRA,TGFB2,SEMA3D,THBS2,HMCN1,FRMD6,EGR2,CCBE1,VASH2,PBX3,CDH12,EPHA3
Coexpression	M39264	HU_FETAL_RETINA_FIBROBLAST	C8: Cell Type Signature	1.951e-21	1.819e-17	1.399e-18	1.359e-17	42	385	TPM1,TPM2,RAMP2,RHOJ,MCAM,FBN2,MYL9,ARHGAP29,FST,LTBP4,PLS3,SDC1,FOXC1,FOXC2,COL4A1,COL6A3,FN1,ID3,CCDC80,CDC42EP3,SMTN,IGFBP7,ISG15,CCN2,DKK2,H19,BGN,SULT1E1,OLFML1,RBMS3,SULF1,CALD1,UACA,EDNRA,TBX18,HMCN1,FRMD6,TJP1,LY6E,PHLDB2,TPBG,EPHA3
Coexpression	M42505	FOROUTAN_INTEGRATED_TGFB_EMT_UP	C2:CGP: Chemical and Genetic Perturbations	2.641e-21	2.462e-17	1.758e-18	1.709e-17	26	120	TPM1,EPHB2,VGLL3,NREP,MYL9,COL4A1,COL6A3,FN1,PODXL,POSTN,IGFBP7,CCN2,HTRA1,ADAM19,SPOCK1,INHBA,PTHLH,NUAK1,TAGLN,GLIPR1,CALD1,NT5E,RGS4,GREM1,DHRS2,CDH2
Coexpression Atlas	gudmap_dev lower uro neuro_e15.5_PelvicGanglion_Sox10_500	dev lower uro neuro_e15.5_PelvicGanglion_Sox10_top-relative-expression-ranked_500	Gudmap Mouse ST 1.0	2.774e-21	1.087e-17	4.576e-19	4.051e-18	45	372	EYA4,PENK,ACTA2,ACTG2,CSMD3,TUBB3,TUBB4A,FBN2,CNN1,COL6A3,COL12A1,FN1,TNC,CRABP2,CRMP1,POSTN,MOXD1,NSG1,OSR1,GLIPR2,PDE5A,SNCG,SNRPN,GATA3,TUBB2B,BRINP1,DCX,NEFL,ST6GAL2,RBMS3,SYT11,SULF1,STMN3,NRK,SYT1,ASTN2,GRIN3A,NNAT,NOVA1,DPYSL3,LPAR1,EDNRA,THBS2,INA,HMCN1
Coexpression Atlas	Facebase_RNAseq_ratio_e10.5_MaxillaryArch_vs_Mandibular_1000	FacebaseRNAseq_ratio_e10.5_MaxillaryArch_vs_Mandibular_top-relative-expression-ranked_1000	FaceBase_RNAseq	2.802e-21	1.098e-17	4.576e-19	4.051e-18	73	973	IGSF8,EPHB6,PDE4D,MAP2,PENK,ACTG2,RFTN2,TENM2,ADCY2,MEIS2,KIAA1549L,PGAP1,SLITRK6,MMP11,MARCHF4,FKBP1A,LTBP4,MGAT5B,PCYT1B,COL6A3,COL8A1,SFRP1,CHODL,RGS5,TNC,WNT7A,SOSTDC1,CCDC80,POSTN,ARHGDIB,MANBAL,IGFBP7,ZNF43,OSR1,RAB15,DKK2,HTRA1,INHBA,GATA3,P4HA3,C11orf87,NCAM2,PDE10A,DCX,COL24A1,CYRIA,FBXL7,NFIB,NRK,CCDC3,ARHGEF9,MAFB,KAZN,GPC2,TMEM231,SHANK1,CACNA1C,TSC22D3,MAMLD1,GAL3ST4,TAMALIN,SEMA3D,T…
Coexpression	M39050	MANNO_MIDBRAIN_NEUROTYPES_HPERIC	C8: Cell Type Signature	3.417e-21	3.185e-17	2.123e-18	2.063e-17	59	794	TPM2,RHOJ,CADM4,ACTA2,MCAM,TRIM22,ABCA9,FZD1,MYL9,ARHGAP29,MMP11,FKBP1A,HSPA2,PLS3,FOXC1,COL4A1,COL9A1,FN1,RGS5,ID3,AKAP12,SMTN,ARHGDIB,IGFBP7,ISG15,LYPD3,ITPRIP,PDE5A,PRKG1,MYADM,ARHGAP24,MYLK,DENND2B,SEPTIN6,BGN,SULT1E1,OLFML2A,OLFML1,RBMS3,CCDC3,KCNMB1,SGCE,TAGLN,GPC1,CACNA1C,ZEB1,SASH1,CALD1,UACA,PLXDC1,TSC22D3,EDNRA,MSRB3,TBX18,LMNA,FRMD6,EGR2,TJP1,UBASH3B
Coexpression Atlas	gudmap_dev lower uro neuro_e14.5_PelvicGanglion_Sox10_1000	dev lower uro neuro_e14.5_PelvicGanglion_Sox10_top-relative-expression-ranked_1000	Gudmap Mouse ST 1.0	3.558e-21	1.395e-17	5.578e-19	4.938e-18	70	904	TPM2,EYA4,RAMP2,TRAPPC5,PENK,ACTA2,ACTG2,FAM89B,CSMD3,FABP5,FZD1,TUBB3,TUBB4A,FBN2,MYL9,LTBP4,CNN1,FOXC2,COL6A3,SFRP1,COL12A1,FN1,TNC,ID3,DPYSL4,APLP1,CCDC80,CRABP2,CRIP2,CRMP1,POSTN,ARHGDIB,MOXD1,NSG1,OSR1,SNCG,SNRPN,DKK2,GATA2,GATA3,P4HA3,TUBB2B,FJX1,BRINP1,SEPTIN6,BGN,NEFL,TSPAN17,SYT11,SULF1,STMN3,NRK,SYT1,ASTN2,KCNMB4,GRIN3A,NNAT,NOVA1,CTXN1,KRT7,DPYSL3,PSCA,LPAR1,EDNRA,NCS1,TGFB2,THBS2,INA,…
Coexpression	M2573	LIM_MAMMARY_STEM_CELL_UP	C2:CGP: Chemical and Genetic Perturbations	4.67e-21	4.354e-17	2.721e-18	2.644e-17	46	480	TPM2,VGLL3,RHOJ,ACTA2,MCAM,ACTG2,TRIM29,FABP5,MYL9,EVA1A,FHL1,FST,LTBP4,PLS3,CNN1,COL4A1,COL9A2,COL12A1,POU3F1,SMTN,RND3,POSTN,NSG1,OSR1,CCN2,IL17RD,DCBLD2,DKK3,MYH11,HTRA1,ARHGAP24,MYLK,PARD6G,FJX1,SULF1,CCDC3,KCNMB1,TAGLN,PCBP4,DPYSL3,CALD1,NT5E,TAMALIN,MSRB3,EGR2,ARMH4
Coexpression Atlas	gudmap_developingKidney_e14.5 whole kidney - Wnt4 KO_1000	DevelopingKidney_e14.5 whole kidney - Wnt4 KO_emap-6674_top-relative-expression-ranked_1000	Gudmap Mouse MOE430.2	4.882e-21	1.914e-17	7.36e-19	6.515e-18	65	791	TPM1,TPM2,EPHB6,VGLL3,MAP2,RCBTB2,ADCY2,MEIS2,FBN2,CSRNP3,CPT1C,ALDH1A3,MMP11,UBE2E3,MEX3B,CAP2,COL6A3,SFRP1,TUBB,SESN3,DPYSL4,CRABP2,CDC42EP3,AKAP12,RND3,POSTN,MOXD1,NKD1,PDE5A,DKK2,DOCK11,GAS1,GATA2,ZC4H2,DCX,SULT1E1,OLFML1,RBMS3,SULF1,NFIB,NTM,NRK,SYT1,NNAT,ST8SIA4,NOVA1,EHBP1,DPYSL3,CALD1,TSC22D3,ADAMTS5,TAMALIN,LPAR1,EDNRA,LSM12,TGFB2,TBX18,SEMA3D,HMCN1,SERTAD4,PWWP3B,LY6H,CDH2,SMAD1,SENP7
Coexpression	M39067	MANNO_MIDBRAIN_NEUROTYPES_HDA	C8: Cell Type Signature	6.231e-21	5.808e-17	3.393e-18	3.297e-17	47	506	CTTNBP2,MAP2,NREP,REEP2,ADCY2,SBK1,TUBB3,CSRNP3,SDC1,CNTN1,TRIM46,COL8A1,BIN1,APLP1,CDC42EP3,AKAP12,CRMP1,SHF,NSG1,MIAT,TUBB2B,FJX1,DCX,CYRIA,TUBA1A,NTM,NECTIN1,GPC2,GRIN3A,NNAT,EHBP1,DPYSL3,STMN1,OPRK1,TTLL7,SEMA3D,PIANP,MSANTD3-TMEFF1,INA,SERTAD4,PAK3,LY6H,UBASH3B,PBX3,TOX2,RBFOX2,ARMH4
Coexpression Atlas	DevelopingLowerUrinaryTract_e14.5_ urogenital sinus_emap-6689_1000	DevelopingLowerUrinaryTract_e14.5_ urogenital sinus_emap-6689_top-relative-expression-ranked_1000	Gudmap Mouse MOE430.2	6.26e-21	2.454e-17	9.089e-19	8.045e-18	66	818	EYA4,MAP2,BACH2,CSMD3,TENM2,TUBB3,CSRNP3,ALDH1A3,SLITRK6,PCDH10,UBE2E3,CAP2,CNTN1,COL8A1,TNC,CRMP1,RND3,MOXD1,DKK1,CELF1,ZKSCAN1,PRKG1,MIAT,DKK3,DKK2,SPOCK1,INHBA,GAS2,GATA3,C11orf87,NCAM2,GDF10,DCX,NEFL,ST6GAL2,CYRIA,RBMS3,SYT11,SULF1,STMN3,NRK,SYT1,GRIN3A,NNAT,ST8SIA4,NOVA1,DPYSL3,GAL3ST4,ADAMTS5,TFAP2A,LPAR1,RGS4,GSK3B,EDNRA,MSRB3,TGFB2,TBX18,INA,ENTPD3,SERTAD4,PAK3,CDH2,SMAD1,RBFOX2,TPBG,EPHA3
Coexpression	MM1082	LIM_MAMMARY_STEM_CELL_UP	M2:CGP: Chemical and Genetic Perturbations	6.551e-21	6.107e-17	3.393e-18	3.297e-17	46	484	TPM2,VGLL3,RHOJ,ACTA2,MCAM,ACTG2,TRIM29,FABP5,MYL9,EVA1A,FHL1,FST,LTBP4,PLS3,CNN1,COL4A1,COL9A2,COL12A1,POU3F1,SMTN,RND3,POSTN,NSG1,OSR1,CCN2,IL17RD,DCBLD2,DKK3,MYH11,HTRA1,ARHGAP24,MYLK,PARD6G,FJX1,SULF1,CCDC3,KCNMB1,TAGLN,PCBP4,DPYSL3,CALD1,NT5E,TAMALIN,MSRB3,EGR2,ARMH4
Coexpression Atlas	PCBC_ratio_EB_vs_SC_500	ratio_EmbryoidBody_vs_StemCell_top-relative-expression-ranked_500	PCBC	9.752e-21	3.823e-17	1.365e-18	1.208e-17	51	498	CPA4,CDKN2A,EYA4,RHOJ,PENK,ACTA2,HLX,MEIS2,SLITRK6,PLN,FOXC1,FOXC2,COL6A3,COL8A1,COL12A1,FN1,TNC,WT1,CCDC80,POSTN,DKK1,IGFBP7,OSR1,DKK2,H19,INHBA,GAS1,GAS2,GATA2,GATA3,GBP1,GDF10,PTHLH,BGN,SULT1E1,OLFML1,RBMS3,SULF1,CCDC3,DLX2,GLIPR1,NIPAL4,ZEB1,TFAP2A,RGS4,ZNF503,MSRB3,TGFB2,GREM1,LY6H,EPHA3
Coexpression Atlas	PCBC_ratio_MESO-15 amniotic fluid MSC_vs_MESO-15 blastocyst_cfr-2X-p05	MESO-15 amniotic fluid MSC_vs_MESO-15 blastocyst-Confounder_removed-fold2.0_adjp0.05	PCBC_AltAnalyze	1.429e-20	5.601e-17	1.931e-18	1.71e-17	91	1479	EPHB2,EPHB6,TRAF5,MAP2,MCAM,E2F7,PLPPR3,RCBTB2,MCM5,REEP2,MEIS2,SBK1,FZD1,FBN2,MEX3A,CPT1C,PGAP1,ARHGAP29,FST,LTBP4,MEX3B,CAP2,RBM38,SEMA3F,ISLR2,TEAD2,LRP12,CCDC74B,COL9A1,COL9A2,LMF1,SFRP1,COL13A1,CEP85,SEPTIN5,PODXL,APLP1,CRABP2,PREPL,AKAP12,MOXD1,DKK1,TAF9B,CYYR1,ITPRIP,LIMCH1,IL17RD,DCBLD2,MIAT,H19,TCEAL7,MYLK,SPOCK1,GAS1,FJX1,SYNC,MEIS3,AIF1L,SYT11,SULF1,NECTIN1,MAFB,NKAIN1,GPC2,TMEM231,WAS…
Coexpression	M1941	MEISSNER_BRAIN_HCP_WITH_H3K4ME3_AND_H3K27ME3	C2:CGP: Chemical and Genetic Perturbations	1.616e-20	1.506e-16	7.927e-18	7.703e-17	68	1074	TPM1,CDKN2A,EYA4,ASIC2,PENK,MCAM,E2F7,HLX,SEMA5B,ANLN,EVA1A,ARHGAP29,FST,MGAT5B,HSPA2,SDC1,FOXC1,SEMA3F,SFRP1,COL12A1,FN1,PODXL,WNT7A,ID3,STIL,MOXD1,SCUBE2,IGFBP7,DLL3,GLIPR2,UHRF1,PDE5A,CCN2,PRKG1,IL17RD,HTRA1,GAS1,GATA2,TUBB2B,AIF1L,PDE10A,PTHLH,FBXL7,NFIB,CCDC3,BUB1,MAFB,DLX2,NIPAL4,SASH1,UACA,DUSP4,ADAMTS8,ADAMTS5,ZNF503,TGFB2,TBX18,SOX21,INA,HMCN1,EGR2,CCBE1,TLL2,VASH2,GREM1,PHLDB2,TPBG,EPHA3
Coexpression Atlas	cerebral cortex	cerebral cortex	Human Protein Atlas	1.778e-20	6.968e-17	2.323e-18	2.056e-17	89	1428	EPHB6,TTYH1,MAP2,ASIC2,CADM4,PLPPR3,RFTN2,CSMD3,TENM2,ADCY1,REEP2,ADCY2,EHD3,SBK1,TUBB3,TUBB4A,KIAA1549L,CSRNP3,SEMA5B,ANLN,CPT1C,MARCHF4,PCDH10,MGAT5B,IGLON5,CAP2,CNTN1,PDZD4,BEGAIN,PCYT1B,TRIM46,ISLR2,BIN1,WNT7A,DPYSL4,APLP1,SLITRK3,CRMP1,LRRN3,DLL3,DKK3,FAM131B,TCEAL7,B4GALNT1,SPOCK1,C11orf87,NCAM2,LAMP5,TUBB2B,FJX1,BRINP1,DCX,NEFL,ST6GAL2,CYRIA,ANOS1,NUAK1,SYT11,STMN3,NTM,TMCC2,SYT1,KCNMB4,NK…
Coexpression Atlas	gudmap_developingKidney_e15.5_Ureteral Smooth Musc_1000_k2	DevelopingKidney_e15.5_Ureteral Smooth Musc_emap-28812_k-means-cluster#2_top-relative-expression-ranked_1000	Gudmap Mouse MOE430.2	1.978e-20	7.755e-17	2.502e-18	2.214e-17	38	270	TPM2,TRAF5,PDE4D,RHOJ,ACTA2,ACTG2,MEIS2,KIAA1549L,MYL9,CNN1,CAP2,CNTN1,COL9A1,POU3F1,PREPL,PDE5A,ATP2B4,DKK3,MYH11,MYLK,GATA2,CYRIA,SULF1,KCNMB1,SYT1,TAGLN,ST8SIA4,GLIPR1,EHBP1,NIPAL4,CALD1,NT5E,ADAMTS8,MSRB3,TBX18,PBX3,TPBG,RASD2
Coexpression Atlas	gudmap_kidney_adult_Mesangium_Meis_500	kidney_adult_Mesangium_Meis_top-relative-expression-ranked_500	Gudmap Mouse MOE430.2	2.217e-20	8.692e-17	2.716e-18	2.404e-17	47	429	RHOJ,TRPC4,ACTA2,MCAM,PICALM,ABCA9,EHD3,MYL9,PLN,PLS3,FOXC1,COL8A1,COL12A1,RGS5,CCDC80,SP110,IFIT1,CDC42EP3,CRIP2,POSTN,ARHGDIB,TAF9B,IGFBP7,PDE5A,CCN2,PRKG1,SNCG,DCBLD2,DKK2,MYH11,HTRA1,GATA3,GBP1,SLFN5,GDF10,BGN,CYRIA,TSPAN17,KCNMB1,CALD1,UACA,NT5E,ADAMTS5,RGS4,EDNRA,SLC7A8,EPHA3
Coexpression	M1999	WONG_ADULT_TISSUE_STEM_MODULE	C2:CGP: Chemical and Genetic Perturbations	2.547e-20	2.375e-16	1.187e-17	1.154e-16	55	721	TPM1,HLX,NREP,TENM2,MYL9,FHL1,HSPA2,PLS3,SDC1,CNTN1,FOXC1,COL4A1,SFRP1,FN1,RGS5,TNC,POSTN,MOXD1,IGFBP7,ZKSCAN1,ISG15,CCN2,LIMCH1,DKK3,MYADM,HTRA1,MYLK,GATA2,GATA3,NCAM2,MARCKSL1,BGN,NFIB,STMN3,NRK,SGCE,TAGLN,ZFP90,ZEB1,SASH1,CALD1,DUSP4,ACTR3B,CBFA2T3,TAMALIN,RGS4,ZNF503,FRMD6,EGR2,LTBP2,GREM1,PBX3,CDH2,SMAD1,PHLDB2
Coexpression	M39070	MANNO_MIDBRAIN_NEUROTYPES_HNBGABA	C8: Cell Type Signature	4.235e-20	3.948e-16	1.88e-17	1.827e-16	54	703	EYA4,PDE4D,CTTNBP2,MAP2,ASIC2,BACH2,CSMD3,ADCY1,REEP2,ADCY2,MEIS2,SBK1,TUBB3,KIAA1549L,CSRNP3,PGAP1,PDZD4,TRIM46,APLP1,CRMP1,NSG1,MIAT,FAM131B,SPOCK1,GATA3,C11orf87,TUBB2B,BRINP1,DCX,ST6GAL2,ANOS1,NUAK1,RBMS3,NTM,NECTIN1,SYT1,GRIN3A,NNAT,CACNA1C,DPYSL3,CNTRL,ADAMTS5,TTLL7,PIANP,MSANTD3-TMEFF1,INA,GPR137C,VASH2,SERTAD4,PAK3,UBASH3B,PBX3,TOX2,RBFOX2
Coexpression Atlas	gudmap_developingLowerUrinaryTract_e13.5_bladder neck-urethr mesench_1000	DevelopingLowerUrinaryTract_e13.5_bladder neck-urethr mesench_emap-3087_top-relative-expression-ranked_1000	Gudmap Mouse MOE430.2	5.072e-20	1.988e-16	6.025e-18	5.333e-17	65	827	EYA4,PDE4D,MAP2,BACH2,ACTG2,RCBTB2,TENM2,TUBB3,CSRNP3,SLITRK6,FST,PCDH10,UBE2E3,MEX3B,CAP2,CNTN1,KLF11,COL8A1,LRP12,COL9A1,CDC42EP3,CRMP1,RND3,LRRN3,MOXD1,DKK1,PDE5A,LIMCH1,DKK2,SPOCK1,GAS2,C11orf87,NCAM2,BRINP1,ZC4H2,DCX,PTHLH,NEFL,COL24A1,ST6GAL2,CYRIA,SYT11,SULF1,STMN3,ZBTB21,SYT1,KIF3C,GRIN3A,ST8SIA4,DPYSL3,PCDHB10,ADAMTS5,LPAR1,RGS4,EDNRA,TTLL7,TBX18,LMNA,EGR2,SERTAD4,PAK3,CDH2,TPBG,EPHA3,AR…
Coexpression Atlas	gudmap_developingKidney_e15.5_Ureteral Smooth Musc_500_k5	DevelopingKidney_e15.5_Ureteral Smooth Musc_emap-28812_k-means-cluster#5_top-relative-expression-ranked_500	Gudmap Mouse MOE430.2	5.494e-20	2.154e-16	6.297e-18	5.574e-17	32	187	TPM2,TRAF5,EYA4,ACTA2,ACTG2,KIAA1549L,MYL9,FST,CNN1,CAP2,CNTN1,COL9A1,POU3F1,PDE5A,DKK3,MYH11,MYLK,GATA2,GDF10,CYRIA,SULF1,SYT1,TAGLN,ST8SIA4,GLIPR1,CALD1,NT5E,MSRB3,TBX18,PBX3,TPBG,RASD2
Coexpression Atlas	gudmap_RNAseq_e15.5_Podocytes_2500	gudmap_RNAseq_e15.5_Podocytes_2500	Gudmap RNAseq	5.623e-20	2.204e-16	6.297e-18	5.574e-17	103	1860	RAMP2,RHOJ,CADM4,PENK,ACTA2,MCAM,HLX,ACTG2,HSPBP1,NREP,REEP2,ADCY2,FABP5,FZD1,TUBB4A,MYL9,SEMA5B,HOXD11,ARHGAP31,EVA1A,FKBP1A,LTBP4,HSPA2,CNN1,RBM38,FOXC1,COL4A1,JCAD,COL6A3,COL9A1,COL12A1,STARD4,RGS5,TNC,PODXL,WT1,ID3,SOSTDC1,APLP1,CCDC80,CDC42EP3,CRIP2,AKAP12,CRMP1,SMTN,POSTN,ARHGDIB,MOXD1,SCUBE2,NKD1,IGFBP7,ZNF43,NSG1,CYYR1,GLIPR2,LIMCH1,SNCG,ATP2B4,DKK3,DKK2,H19,MYADM,MYH11,HTRA1,MYLK,GATA2,G…
Coexpression Atlas	Facebase_RNAseq_e8.5_Non-Floor Plate Neural Epithelium_1000	FacebaseRNAseq_e8.5_Non-Floor Plate Neural Epithelium_top-relative-expression-ranked_1000	FaceBase_RNAseq	5.965e-20	2.338e-16	6.496e-18	5.749e-17	71	976	IGSF8,EYA4,TENM2,REEP2,ADCY2,MEIS2,TUBB3,TUBB4A,KIAA1549L,SEMA5B,PKM,SLITRK6,MMP11,FHL1,LTBP4,PLS3,RBM38,COL6A3,COL8A1,CHODL,RGS5,TNC,PODXL,SOSTDC1,DPYSL4,POU3F1,CCDC80,SP110,CRMP1,POSTN,SCUBE2,DKK1,IGFBP7,ZNF43,OSR1,ATP2B4,SNRPN,DKK2,HTRA1,INHBA,P4HA3,NCAM2,AIF1L,DCX,COL24A1,OLFML1,SYT11,NFIB,NRK,CCDC3,NECTIN1,ASTN2,NNAT,NOVA1,SHANK1,GLIPR1,CACNA1C,KRT7,DTNA,MAMLD1,ZNF503,SEMA3D,THBS2,SOX21,INA,…
Coexpression Atlas	gudmap_dev gonad_e11.5_F_GonadVasMes_Flk_1000	dev gonad_e11.5_F_GonadVasMes_Flk_top-relative-expression-ranked_1000	Gudmap Mouse ST 1.0	6.523e-20	2.557e-16	6.911e-18	6.117e-17	65	831	TPM1,MCC,NREP,ADCY2,MEIS2,FBN2,MEX3A,MYL9,CSRNP3,ARHGAP29,SLITRK6,FST,PLS3,MEX3B,CNN1,CAP2,FOXC2,SFRP1,COL12A1,RGS5,PODXL,WT1,SESN3,CCDC80,STIL,CRABP2,RND3,POSTN,ARHGDIB,NKD1,SCMH1,OSR1,UHRF1,PRKG1,H19,CCP110,INHBA,PARD6G,DENND2B,BGN,OLFML1,RBMS3,SULF1,NFIB,NRK,BUB1,ZNF558,NNAT,WASF1,NOVA1,KRT7,CALD1,LCP1,CDCA8,LPAR1,EDNRA,TGFB2,HMCN1,EGR2,PBX3,CDH2,PLEKHO1,PHLDB2,TPBG,ARMH4
Coexpression Atlas	gudmap_developingLowerUrinaryTract_P2_bladder detrusor (LCM)_1000	DevelopingLowerUrinaryTract_P2_bladder detrusor (LCM)_emap-30376_top-relative-expression-ranked_1000	Gudmap Mouse MOE430.2	6.737e-20	2.641e-16	6.949e-18	6.151e-17	62	761	TPM1,TPM2,TRAF5,PDE4D,RHOJ,ACTA2,MCAM,ACTG2,TENM2,ABCA9,MYL9,EVA1A,SLITRK6,FHL1,PLN,HSPA2,CNN1,CAP2,COL6A3,COL8A1,CHODL,IFIT1,CDC42EP3,ARL4D,SMTN,POSTN,SCUBE2,IGFBP7,PDE5A,PRKG1,DKK3,MYH11,HTRA1,MYLK,GBP1,PTHLH,BGN,CYRIA,TSPAN17,CCDC3,ARHGEF9,KCNMB1,TAGLN,GLIPR1,CACNA1C,NIPAL4,CALD1,NT5E,DTNA,CAMK2G,ADAMTS8,ACTR3B,RGS4,TTLL7,MSRB3,TBX18,SEMA3D,THBS2,LMNA,LTBP2,PLEKHO1,RASD2
Coexpression Atlas	gudmap_kidney_P0_JuxtaGlom_Ren1_1000	kidney_P0_JuxtaGlom_Ren1_top-relative-expression-ranked_1000	Gudmap Mouse MOE430.2	7.182e-20	2.815e-16	7.039e-18	6.23e-17	68	905	TPM1,TPM2,VGLL3,PDE4D,RHOJ,PENK,ACTA2,MCAM,ACTG2,PICALM,TUBB4A,MYL9,HOXD11,FHL1,PLS3,CNN1,CAP2,FOXC2,COL8A1,COL12A1,FN1,RGS5,OLFML2B,SOSTDC1,CCDC80,AKAP12,SMTN,RND3,POSTN,ARHGDIB,IGFBP7,PDE5A,CCN2,LIMCH1,PRKG1,SNCG,ATP2B4,DKK2,H19,MYADM,MYH11,HTRA1,ARHGAP24,MYLK,INHBA,GAS2,GATA3,P4HA3,FJX1,SLFN5,BGN,NTM,NRK,CCDC3,KCNMB1,SGCE,TAGLN,CACNA1C,KRT7,DPYSL3,CALD1,ADAMTS8,EDNRA,MSRB3,TGFB2,SLC7A8,SEMA3D,…
Coexpression Atlas	PCBC_ratio_MESO-30_vs_SC_cfr-2X-p05	Mesoderm Day 30_vs_Pluripotent Stem Cells-Confounder_removed-fold2.0_adjp0.05	PCBC_AltAnalyze	7.182e-20	2.815e-16	7.039e-18	6.23e-17	95	1630	CPA4,TPM1,TPM2,CDKN2A,MAP2,CADM4,ACTA2,DACT2,FAM89B,PICALM,MEIS2,FZD1,FBN2,MYL9,UPK3A,AMOTL2,MMP11,PLN,PCDH10,LTBP4,CNN1,CAP2,TOM1L2,COL4A1,COL6A3,COL8A1,BIN1,COL9A2,LMF1,COL12A1,MRAS,FN1,SEPTIN5,TNC,SESN3,APLP1,CCDC80,CRABP2,CDC42EP3,CRIP2,ARL4D,SMTN,WDR47,RND3,POSTN,ARHGDIB,MOXD1,DKK1,IGFBP7,ZKSCAN1,SCMH1,GLIPR2,CCN2,LIMCH1,IFI6,ATP2B4,DKK3,DKK2,H19,HTRA1,ADAM19,SPOCK1,INHBA,GAS1,FJX1,BGN,SULT1…
Coexpression	M19391	LIU_PROSTATE_CANCER_DN	C2:CGP: Chemical and Genetic Perturbations	8.852e-20	8.251e-16	3.751e-17	3.645e-16	45	493	TPM1,TPM2,TRAF5,EYA4,RHOJ,TRPC4,PENK,ACTA2,MCAM,ACTG2,TRIM29,MYL9,FHL1,SDC1,COL4A1,KLF11,COL9A1,MRAS,COL13A1,STARD4,SOSTDC1,CRABP2,CDC42EP3,AKAP12,SCUBE2,ATP2B4,DKK3,MYH11,MYLK,GATA3,SLFN5,DENND2B,TUBA1A,SGCE,TAGLN,KRT7,DPYSL3,CALD1,TSC22D3,DTNA,ADAMTS5,LPAR1,MSRB3,TGFB2,FRMD6
Coexpression	M39040	FAN_EMBRYONIC_CTX_BRAIN_ENDOTHELIAL_2	C8: Cell Type Signature	9.383e-20	8.747e-16	3.803e-17	3.696e-16	36	303	TPM2,MCAM,MYL9,ARHGAP29,AMOTL2,PLS3,COL4A1,COL9A1,FN1,RGS5,CCDC80,CRIP2,AKAP12,SMTN,IGFBP7,PDE5A,PRKG1,MYLK,DENND2B,BGN,OLFML2A,RBMS3,NTM,CCDC3,SGCE,TAGLN,ZEB1,SASH1,CALD1,UACA,PLXDC1,EDNRA,TBX18,LMNA,FRMD6,TJP1
Coexpression Atlas	gudmap_dev gonad_e11.5_M_GonadVasMes_Flk_k1_1000	dev gonad_e11.5_M_GonadVasMes_Flk_k-means-cluster#1_top-relative-expression-ranked_1000	Gudmap Mouse ST 1.0	1.438e-19	5.637e-16	1.375e-17	1.217e-16	41	337	TPM1,MCC,ADCY2,MEIS2,FBN2,MEX3A,SLITRK6,MEX3B,CAP2,COL6A3,SFRP1,RGS5,TNC,CRABP2,RND3,POSTN,NKD1,NSG1,OSR1,UHRF1,PRKG1,ATP2B4,BGN,OLFML1,RBMS3,NFIB,NRK,ZNF558,MAFB,NNAT,DNMT3A,KRT7,CALD1,LPAR1,EDNRA,TGFB2,SEMA3D,HMCN1,EGR2,VASH2,PBX3
Coexpression Atlas	gudmap_kidney_adult_Mesangium_Meis_1000	kidney_adult_Mesangium_Meis_top-relative-expression-ranked_1000	Gudmap Mouse MOE430.2	1.842e-19	7.219e-16	1.719e-17	1.521e-16	66	872	TPM2,RHOJ,ATXN7L1,CADM4,TRPC4,ACTA2,MCAM,RFTN2,PICALM,ABCA9,EHD3,MYL9,ARHGAP31,FHL1,PLN,PLS3,FOXC1,COL4A1,COL6A3,COL8A1,COL12A1,RGS5,TNC,OLFML2B,CCDC80,SP110,IFIT1,CDC42EP3,CRIP2,SMTN,POSTN,ARHGDIB,TAF9B,IGFBP7,PDE5A,CCN2,PRKG1,SNCG,DCBLD2,DKK2,MYH11,HTRA1,MYLK,GATA3,GBP1,SLFN5,PDE10A,GDF10,BGN,CYRIA,TSPAN17,RBMS3,KCNMB1,ZEB1,CALD1,UACA,NT5E,DTX3,ADAMTS5,RGS4,EDNRA,SLC7A8,TJP1,TNFAIP2,PHLDB2,EPHA3
Coexpression Atlas	GSM777055_500	Stromal Cells, FRC.SLN, gp38+ CD31- CD140a+, Lymph Node, avg-4	Immgen.org, GSE15907	2.502e-19	9.807e-16	2.281e-17	2.019e-16	47	455	RAMP2,RHOJ,PENK,ACTA2,ABCA9,FZD1,MYL9,ARHGAP29,AMOTL2,LTBP4,PLS3,COL4A1,COL6A3,FN1,RGS5,TNC,OLFML2B,ID3,SOSTDC1,CCDC80,CRIP2,RND3,POSTN,IGFBP7,HTRA1,ARHGAP24,GAS1,DENND2B,BGN,OLFML1,RBMS3,SULF1,NFIB,SGCE,TAGLN,DPYSL3,SASH1,CALD1,ADAMTS5,LPAR1,THBS2,LMNA,TJP1,LTBP2,GREM1,CDH2,EPHA3
Coexpression	M1804	WANG_SMARCE1_TARGETS_UP	C2:CGP: Chemical and Genetic Perturbations	2.897e-19	2.7e-15	1.125e-16	1.093e-15	35	294	RHOJ,ACTA2,MCC,FZD1,MYL9,PCDH10,JCAD,COL6A3,COL8A1,COL12A1,FN1,WT1,SMTN,POSTN,GLIPR2,SERPINB7,MYLK,SPOCK1,GATA3,SLFN5,DENND2B,ANOS1,SULF1,MAFB,TAGLN,DPYSL3,CALD1,PCDHB10,TGFB2,PLEKHG4B,TBX18,HMCN1,TLL2,TOX2,TPBG
Coexpression Atlas	GSM777046_500	Stromal Cells, Fi.Sk, gp38+ CD140a+, Skin, avg-4	Immgen.org, GSE15907	2.899e-19	1.136e-15	2.535e-17	2.244e-16	46	437	RAMP2,RHOJ,PENK,NREP,ABCA9,MEIS2,FZD1,ARHGAP29,FHL1,FST,LTBP4,PLS3,COL6A3,COL8A1,SFRP1,FN1,TNC,OLFML2B,ID3,CCDC80,CRIP2,RND3,POSTN,IGFBP7,DCBLD2,DKK2,H19,HTRA1,GAS1,BGN,OLFML1,SULF1,NFIB,SGCE,NOVA1,DPYSL3,SASH1,ADAMTS5,LPAR1,EDNRA,THBS2,LMNA,HMCN1,TNFAIP2,TPBG,EPHA3
Coexpression Atlas	facebase_RNAseq_e14.5_palate_poster_oral_Tgfbr2_WT_2500	facebase_RNAseq_e14.5_palate_poster_oral_Tgfbr2_WT_2500	Gudmap RNAseq	2.91e-19	1.141e-15	2.535e-17	2.244e-16	90	1519	EYA4,CTTNBP2,RAMP2,MAP2,TRPC4,PENK,MCAM,MCC,MRPS35,RFTN2,NREP,ADCY2,FZD1,FBN2,MYL9,ARHGAP31,CPT1C,SLITRK6,MMP11,LTBP4,PDZD4,PCYT1B,TRIM46,JCAD,COL6A3,COL8A1,LRP12,COL9A1,SFRP1,COL12A1,FN1,RGS5,TNC,WNT7A,SOSTDC1,ZFP14,CCDC80,POSTN,MOXD1,NSG1,OSR1,RASL11B,PRKG1,ATP2B4,DKK3,HTRA1,ARHGAP24,INHBA,GAS1,GAS2,P4HA3,BRINP1,GDF10,DCX,BGN,OLFML2A,ST6GAL2,CYRIA,FBXL7,OLFML1,RBMS3,SULF1,NFIB,NRK,CCDC3,ARHGEF9…
Coexpression	M39071	MANNO_MIDBRAIN_NEUROTYPES_HGABA	C8: Cell Type Signature	3.283e-19	3.061e-15	1.224e-16	1.19e-15	67	1106	PDE4D,MAP2,ASIC2,BACH2,NREP,CSMD3,TENM2,ADCY1,SBK1,TUBB3,KIAA1549L,CSRNP3,PGAP1,CNTN1,PDZD4,TRIM46,COL8A1,LRP12,WNT7A,APLP1,CDC42EP3,PREPL,CRMP1,LRRN3,CELF1,NSG1,MIAT,ARHGAP24,SPOCK1,RBM26,GATA3,C11orf87,TUBB2B,DCX,ST6GAL2,CYRIA,NUAK1,RBMS3,NTM,NECTIN1,SYT1,KIF3C,GPC2,GRIN3A,NNAT,ST8SIA4,WASF1,NOVA1,CACNA1C,DPYSL3,DUSP4,NCS1,TTLL7,PIANP,MSANTD3-TMEFF1,INA,GPR137C,VASH2,PAK3,R3HDM1,UBASH3B,PBX3,TO…
Coexpression Atlas	gudmap_dev gonad_e12.5_M_InterstitLeydig_MafB_1000	dev gonad_e12.5_M_InterstitLeydig_MafB_top-relative-expression-ranked_1000	Gudmap Mouse ST 1.0	4.845e-19	1.899e-15	4.129e-17	3.655e-16	61	768	TPM1,VGLL3,MAP2,ACTA2,MCC,HMMR,ADCY2,FBN2,MEX3A,ANLN,RAD54B,LTBP4,COL4A1,ISLR2,COL6A3,SFRP1,MRAS,TNC,WT1,SOSTDC1,CLDND1,SMTN,RND3,POSTN,LRRN3,IGFBP7,GLIPR2,UHRF1,PDE5A,ATP2B4,MYADM,HTRA1,ADAM19,INHBA,DENND2B,BGN,NUAK1,OLFML1,SULF1,NRK,BUB1,ZNF558,NNAT,DNMT3A,CALD1,PLXDC1,DTNA,ADAMTS5,CDCA8,LPAR1,EDNRA,NCS1,TGFB2,SEMA3D,HMCN1,EGR2,PAK3,SLC7A5,PWWP3B,EPHA3,ARMH4
Coexpression Atlas	gudmap_developingLowerUrinaryTract_P1_bladder_1000_J	DevelopingLowerUrinaryTract_P1_bladder_J_emap-30374_top-relative-expression-ranked_1000	Gudmap Mouse MOE430.2	6.25e-19	2.45e-15	5.213e-17	4.614e-16	61	772	TPM1,TPM2,VGLL3,PDE4D,RHOJ,ACTA2,ACTG2,TENM2,TUBB3,MYL9,PROM2,UPK3A,SLITRK6,FHL1,PLN,HSPA2,CNN1,CAP2,CNTN1,COL8A1,COL12A1,RGS5,TNC,CDC42EP3,SMTN,POSTN,SCUBE2,LYPD3,PDE5A,CCN2,DKK3,MYCL,MYADM,MYH11,MYLK,SPOCK1,GATA3,GBP1,C11orf87,DCX,PTHLH,NEFL,CYRIA,STMN3,TAGLN,GLIPR1,KRT7,NIPAL4,CALD1,NT5E,DTNA,PSCA,RGS4,TTLL7,MSRB3,THBS2,ENTPD3,LTBP2,TNFAIP2,RBFOX2,RASD2
Coexpression Atlas	PCBC_ratio_EB amniotic fluid MSC_vs_EB blastocyst_cfr-2X-p05	EB amniotic fluid MSC_vs_EB blastocyst-Confounder_removed-fold2.0_adjp0.05	PCBC_AltAnalyze	7.016e-19	2.75e-15	5.73e-17	5.072e-16	59	727	TTYH1,EYA4,MAP2,CADM4,CNTNAP3,DACT2,PLPPR3,KATNAL1,REEP2,SBK1,TUBB3,TUBB4A,SEMA5B,CPT1C,ALDH1A3,AMOTL2,MGAT5B,TRIM46,COL9A2,DPYSL4,APLP1,CRMP1,ARL4D,WDR47,RND3,RASL11B,CCN2,SNCG,MIAT,FAM131B,DKK2,MYCL,TCEAL7,TUBB2B,BRINP1,GDF10,DCX,CYRIA,SYT11,STMN3,TMCC2,SYT1,MAFB,NKAIN1,KIF3C,GPC2,PCBP4,WASF1,WNK2,NOVA1,NOVA2,DDR1,CBFA2T3,INA,GPR137C,EGR2,LY6H,TOX2,ARHGAP19
Coexpression Atlas	Facebase_RNAseq_ratio_e9.5_MaxillaryArch_vs_Mandibular_1000	FacebaseRNAseq_ratio_e9.5_MaxillaryArch_vs_Mandibular_top-relative-expression-ranked_1000	FaceBase_RNAseq	7.958e-19	3.12e-15	6.367e-17	5.635e-16	69	972	IGSF8,TTYH1,EYA4,PDE4D,PENK,TENM2,ADCY2,MEIS2,TUBB3,TUBB4A,KIAA1549L,CSRNP3,SEMA5B,ALDH1A3,SLITRK6,MMP11,PCDH10,LTBP4,IGLON5,PCYT1B,COL6A3,COL8A1,COL9A2,MRAS,CHODL,SEPTIN5,RGS5,TNC,OLFML2B,SOSTDC1,DPYSL4,APLP1,CCDC80,SP110,POSTN,MOXD1,IGFBP7,ZNF43,NSG1,OSR1,ATP2B4,DKK3,DKK2,HTRA1,INHBA,P4HA3,NCAM2,DCX,BGN,COL24A1,ST6GAL2,OLFML1,NFIB,NTM,NRK,CCDC3,ASTN2,WNK2,SHANK1,CACNA1C,KRT7,DTNA,MAMLD1,SEMA3D,…
Coexpression Atlas	gudmap_developingGonad_e11.5_testes and mesonephros_k2_1000	DevelopingGonad_e11.5_testes and mesonephros_emap-3226_k-means-cluster#2_top-relative-expression-ranked_1000	Gudmap Mouse MOE430.2	8.136e-19	3.189e-15	6.378e-17	5.646e-16	23	90	BACH2,TUBB3,DPYSL4,APLP1,CRABP2,CRMP1,RND3,DLL3,SNRPN,TUBB2B,FJX1,MEIS3,DCX,NEFL,SYT11,STMN3,NKAIN1,NNAT,PCBP4,DPYSL3,GAL3ST4,INA,EPHA3
Coexpression Atlas	gudmap_developingLowerUrinaryTract_e14.5_ Genital tubercle F_1000	DevelopingLowerUrinaryTract_e14.5_ Genital tubercle F_emap-6706_top-relative-expression-ranked_1000	Gudmap Mouse MOE430.2	9.057e-19	3.551e-15	6.962e-17	6.162e-16	64	850	VGLL3,EYA4,PDE4D,CTTNBP2,BACH2,HMMR,TRIM29,TENM2,FBN2,CSRNP3,PROM2,EVA1A,SLITRK6,FST,PCDH10,UBE2E3,COL8A1,LRP12,TNC,POGK,WNT7A,SOSTDC1,CRABP2,CDC42EP3,RND3,DKK1,ZKSCAN1,LYPD3,GIGYF2,RASL11B,PDE5A,LIMCH1,DKK2,MYCL,SERPINB7,SPOCK1,GAS2,MARCKSL1,NEFL,ST6GAL2,SULF1,NTM,ARHGEF9,DLX2,ST8SIA4,DPYSL3,NT5E,PCDHB10,GAL3ST4,TFAP2A,LPAR1,EDNRA,NCS1,RFWD3,TBX18,HMCN1,FRMD6,VASH2,SERTAD4,PAK3,GREM1,CDH2,TPBG,E…
Coexpression Atlas	gudmap_developingLowerUrinaryTract_e13.5_bladder mesenchyme_1000	DevelopingLowerUrinaryTract_e13.5_bladder mesenchyme_emap-3087_top-relative-expression-ranked_1000	Gudmap Mouse MOE430.2	1.779e-18	6.972e-15	1.34e-16	1.186e-15	63	837	TPM1,TRAF5,VGLL3,ACTA2,MCC,ACTG2,RCBTB2,HMMR,MEIS2,FZD1,FBN2,MYL9,SLITRK6,MEX3B,CNN1,CAP2,KLF11,COL8A1,LRP12,SFRP1,COL12A1,PODXL,OLFML2B,RND3,CYYR1,OSR1,PDE5A,LIMCH1,DCBLD2,DKK3,MYH11,HTRA1,MYLK,GBP1,C11orf87,BRINP1,ZC4H2,NEFL,CYRIA,SULF1,NFIB,NTM,KCNMB1,SGCE,TAGLN,ST8SIA4,GLIPR1,UACA,ACTR3B,CDCA8,RGS4,TTLL7,MSRB3,TGFB2,TBX18,SEMA3D,THBS2,EGR2,VASH2,PWWP3B,CDH2,RBFOX2,ARHGAP19
Coexpression Atlas	gudmap_dev gonad_e13.5_M_InterstitTestis_Sma_500	dev gonad_e13.5_M_InterstitTestis_Sma_top-relative-expression-ranked_500	Gudmap Mouse ST 1.0	1.812e-18	7.103e-15	1.34e-16	1.186e-15	41	361	TPM1,VGLL3,MAP2,ACTA2,MCC,LTBP4,COL6A3,SFRP1,FN1,RGS5,TNC,SGCD,OLFML2B,SOSTDC1,CRABP2,CDC42EP3,POSTN,LRRN3,DKK1,IGFBP7,PDE5A,PRKG1,ATP2B4,ARHGAP24,INHBA,P4HA3,BGN,OLFML1,SULF1,NRK,KRT7,CALD1,PLXDC1,ADAMTS5,LPAR1,EDNRA,TGFB2,HMCN1,EGR2,PAK3,EPHA3
Coexpression Atlas	gudmap_developingLowerUrinaryTract_e14.5_ Genital tubercle_1000	DevelopingLowerUrinaryTract_e14.5_ Genital tubercle_emap-6706_top-relative-expression-ranked_1000	Gudmap Mouse MOE430.2	2.295e-18	8.995e-15	1.666e-16	1.474e-15	60	769	VGLL3,PDE4D,MAP2,BACH2,E2F7,RFTN2,TRIM29,TENM2,MEIS2,CSRNP3,SLITRK6,PCDH10,SDC1,COL8A1,COL13A1,WNT7A,SOSTDC1,CRABP2,CDC42EP3,RND3,NKD1,DKK1,SCMH1,CYYR1,LYPD3,GIGYF2,LIMCH1,DCBLD2,DKK3,DKK2,MYCL,SPOCK1,INHBA,PARD6G,FJX1,BRINP1,PTHLH,COL24A1,ST6GAL2,NUAK1,SULF1,NTM,CCDC3,ARHGEF9,DLX2,GRIN3A,ST8SIA4,DPYSL3,GAL3ST4,TFAP2A,GSK3B,EDNRA,MSRB3,TGFB2,SEMA3D,HMCN1,FRMD6,TLE4,SERTAD4,RBFOX2
Coexpression Atlas	PCBC_ratio_CardiacMyocyte_vs_SC_cfr-2X-p05	Cardiac Myocyte Cells_vs_Pluripotent Stem Cells-Confounder_removed-fold2.0_adjp0.05	PCBC_AltAnalyze	2.415e-18	9.466e-15	1.721e-16	1.523e-15	96	1747	TPM2,CDKN2A,VGLL3,ACTA2,MCAM,FAM89B,PICALM,ABCA9,MEIS2,EHD3,FZD1,MYL9,EVA1A,PKM,ARHGAP29,ALDH1A3,AMOTL2,FST,TOM1L2,COL4A1,COL6A3,COL8A1,LRP12,COL12A1,MRAS,COL13A1,FN1,TNC,OLFML2B,CCDC80,SP110,IFIT1,CDC42EP3,CRIP2,SMTN,WDR47,RND3,POSTN,ARHGDIB,MOXD1,DKK1,IGFBP7,ISG15,GLIPR2,ITPRIP,CCN2,SNCG,IFI6,DCBLD2,ATP2B4,DKK3,PRSS2,MYADM,HTRA1,ARHGAP24,ADAM19,MYLK,SPOCK1,INHBA,GBP1,P4HA3,FJX1,SLFN5,BGN,CYRIA,…
Coexpression Atlas	gudmap_dev gonad_e12.5_M_InterstitLeydig_MafB_k1_1000	dev gonad_e12.5_M_InterstitLeydig_MafB_k-means-cluster#1_top-relative-expression-ranked_1000	Gudmap Mouse ST 1.0	2.515e-18	9.859e-15	1.76e-16	1.558e-15	38	310	TPM1,VGLL3,ACTA2,MCC,ADCY2,FBN2,MEX3A,LTBP4,COL6A3,SFRP1,TNC,SOSTDC1,RND3,POSTN,LRRN3,GLIPR2,UHRF1,PDE5A,ATP2B4,MYADM,INHBA,BGN,NUAK1,OLFML1,NRK,ZNF558,NNAT,CALD1,ADAMTS5,LPAR1,EDNRA,NCS1,TGFB2,SEMA3D,HMCN1,EGR2,EPHA3,ARMH4
Coexpression Atlas	gudmap_dev lower uro neuro_e14.5_PelvicGanglion_Sox10_500	dev lower uro neuro_e14.5_PelvicGanglion_Sox10_top-relative-expression-ranked_500	Gudmap Mouse ST 1.0	2.9e-18	1.137e-14	1.995e-16	1.766e-15	46	463	EYA4,RAMP2,PENK,ACTA2,ACTG2,FAM89B,CSMD3,FZD1,TUBB3,TUBB4A,CNN1,COL6A3,COL12A1,FN1,CCDC80,CRABP2,CRMP1,POSTN,ARHGDIB,MOXD1,NSG1,OSR1,SNCG,GATA2,GATA3,TUBB2B,FJX1,BRINP1,BGN,NEFL,TSPAN17,SYT11,SULF1,STMN3,SYT1,ASTN2,KCNMB4,GRIN3A,NNAT,KRT7,DPYSL3,PSCA,LPAR1,EDNRA,INA,HMCN1
Coexpression Atlas	JC_fibro_1000_K1	JC_fibro_top-relative-expression-ranked_1000_k-means-cluster#1	PCBC	3.158e-18	1.238e-14	2.135e-16	1.889e-15	46	464	CPA4,TPM2,VGLL3,RHOJ,PENK,ACTA2,EVA1A,MARCHF4,COL6A3,COL8A1,COL12A1,FN1,CCDC80,IFIT1,CDC42EP3,RND3,MOXD1,IGFBP7,ISG15,PDE5A,CCN2,IFI6,DKK3,SAMD9,MYLK,INHBA,GAS1,GBP1,P4HA3,SYNC,BGN,OLFML1,IFI44L,TAGLN,CALD1,UACA,NT5E,MAMLD1,ADAMTS5,LPAR1,SEMA3D,THBS2,FRMD6,EGR2,LTBP2,GREM1
Coexpression Atlas	gudmap_dev lower uro neuro_e14.5_BladdPelvicGanglion_Sox10_1000	dev lower uro neuro_e14.5_BladdPelvicGanglion_Sox10_top-relative-expression-ranked_1000	Gudmap Mouse ST 1.0	3.399e-18	1.332e-14	2.258e-16	1.999e-15	63	848	VGLL3,EYA4,MAP2,PENK,MCAM,ACTG2,FAM89B,PLPPR3,CSMD3,REEP2,FABP5,EHD3,TUBB3,TUBB4A,CSRNP3,HOXD11,PGAP1,SLITRK6,PCDH10,CNN1,CNTN1,PCYT1B,ID3,DPYSL4,APLP1,CRABP2,AKAP12,CRMP1,POSTN,LRRN3,MOXD1,NSG1,GLIPR2,SNCG,SNRPN,GATA3,P4HA3,NCAM2,TUBB2B,FJX1,DCX,SEPTIN6,NEFL,CYRIA,TSPAN17,TUBA1A,RBMS3,SYT11,STMN3,NRK,SYT1,ASTN2,KCNMB4,NNAT,PCBP4,NOVA1,CTXN1,DPYSL3,NKIRAS2,RGS4,MRPL4,INA,ARMH4
Coexpression Atlas	facebase_RNAseq_e14.5_palate_poster_nasal_Tgfbr2_WT_2500	facebase_RNAseq_e14.5_palate_poster_nasal_Tgfbr2_WT_2500	Gudmap RNAseq	3.573e-18	1.401e-14	2.334e-16	2.066e-15	92	1638	TPM1,IGSF8,TPM2,TTYH1,EYA4,MAP2,PENK,ACTA2,RFTN2,TRIM29,NREP,ADCY2,ABCA9,FZD1,FBN2,MYL9,CPT1C,ALDH1A3,MMP11,LTBP4,SDC1,CNN1,PDZD4,TRIM46,JCAD,COL6A3,COL8A1,COL9A1,COL12A1,MRAS,FN1,SEPTIN5,TNC,OLFML2B,WNT7A,SOSTDC1,ZFP14,APLP1,CCDC80,CDC42EP3,POSTN,SHF,NKD1,DKK1,MANBAL,NSG1,RASL11B,RAB15,CCN2,PRKG1,SNCG,ATP2B4,DKK3,DKK2,H19,HTRA1,ARHGAP24,MYLK,INHBA,P4HA3,GDF10,BGN,ST6GAL2,CYRIA,FBXL7,NUAK1,OLFML1…
Coexpression	M45676	HE_LIM_SUN_FETAL_LUNG_C0_MESENCHYMAL_3_CELL	C8: Cell Type Signature	4.171e-18	3.889e-14	1.496e-15	1.453e-14	27	174	EPHB2,CADM4,MCC,MEIS2,FBN2,CLCN5,AMOTL2,MMP11,FST,IGLON5,WT1,APLP1,CRABP2,CDC42EP3,RASL11B,INHBA,DOCK11,GAS2,TUBB2B,MEIS3,ANOS1,CCDC3,ZEB1,LY6H,CDH2,TPBG,EPHA3
GO: Biological Process	GO:0031175	neuron projection development		4.413e-18	2.527e-14	2.527e-14	2.332e-13	85	1424	EPHB2,EPHB6,MAP2,MCAM,E2F7,NREP,CSMD3,TENM2,ADCY1,PICALM,FZD1,TUBB3,SEMA5B,SLITRK6,MAP4K4,PLS3,MRTFA,CNTN1,FOXC1,FOXC2,TRIM46,SEMA3F,ISLR2,COL6A3,LRP12,SFRP1,COL12A1,FN1,CHODL,TNC,WNT7A,DPYSL4,APLP1,CCDC80,SLITRK3,CRABP2,CRMP1,WDR47,POSTN,DKK1,PRKG1,SPOCK1,GAS1,GATA3,PARD6G,NCAM2,TUBB2B,DCX,SEPTIN2,NEFL,ANOS1,TUBA1A,NFIB,STMN3,NTM,NECTIN1,SYT1,KIF3C,GPC2,GRIN3A,WASF1,RAB6A,NOVA1,NOVA2,SHANK1,DDR1…
Coexpression Atlas	Facebase_RNAseq_e8.5_Paraxial Mesoderm_500	FacebaseRNAseq_e8.5_Paraxial Mesoderm_top-relative-expression-ranked_500	FaceBase_RNAseq	4.607e-18	1.806e-14	2.96e-16	2.62e-15	47	489	IGSF8,EYA4,TENM2,ADCY2,ABCA9,MEIS2,KIAA1549L,SEMA5B,SLITRK6,MMP11,LTBP4,FOXC1,COL6A3,COL8A1,CHODL,RGS5,TNC,SOSTDC1,DPYSL4,CCDC80,SP110,POSTN,IGFBP7,ZNF43,OSR1,ATP2B4,DKK2,HTRA1,INHBA,P4HA3,NCAM2,DCX,COL24A1,OLFML1,NFIB,NRK,CCDC3,NNAT,SHANK1,CACNA1C,KRT7,DTNA,MAMLD1,SEMA3D,THBS2,SENP7,EPHA3
Coexpression Atlas	gudmap_dev gonad_e13.5_M_InterstitFLeydig_MafB_k3_1000	dev gonad_e13.5_M_InterstitFLeydig_MafB_k-means-cluster#3_top-relative-expression-ranked_1000	Gudmap Mouse ST 1.0	6.015e-18	2.358e-14	3.803e-16	3.366e-15	39	336	TPM1,VGLL3,ACTA2,MCC,ADCY2,MEX3A,HOXD11,SLITRK6,LTBP4,CNN1,COL6A3,SFRP1,OLFML2B,SOSTDC1,RND3,POSTN,LRRN3,GLIPR2,UHRF1,PDE5A,ATP2B4,MYADM,ARHGAP24,MYLK,INHBA,P4HA3,BGN,OLFML1,NFIB,NRK,CALD1,ADAMTS5,LPAR1,EDNRA,TGFB2,HMCN1,EGR2,EPHA3,ARMH4
Coexpression	M2157	DUTERTRE_ESTRADIOL_RESPONSE_24HR_DN	C2:CGP: Chemical and Genetic Perturbations	7.565e-18	7.052e-14	2.612e-15	2.538e-14	43	504	CDKN2A,TRAF5,MAP2,FBN2,UBE2H,ALDH1A3,MAP4K4,TOM1L2,FN1,SESN3,ID3,CRABP2,IFIT1,RND3,DKK1,ZKSCAN1,GLIPR2,PDE5A,CCN2,LIMCH1,FAM131B,MYADM,DOCK11,ANOS1,NUAK1,EXOC6B,TAGLN,ST8SIA4,ZNF704,SASH1,CALD1,UACA,TSC22D3,DUSP4,TFAP2A,MSRB3,TGFB2,FRMD6,ENTPD3,SERTAD4,CDH2,EPB41,PHLDB2
Coexpression Atlas	ratio_EB_vs_SC_2500_K3	ratio_EmbryoidBody_vs_StemCell_top-relative-expression-ranked_2500_k-means-cluster#3	PCBC	7.933e-18	3.11e-14	4.936e-16	4.369e-15	72	1094	BACH2,PENK,ACTG2,RFTN2,MEIS2,FZD1,FBN2,HOXD11,EVA1A,PCDH10,FOXC1,FOXC2,COL4A1,COL6A3,COL8A1,COL9A2,COL12A1,FN1,SOSTDC1,APLP1,CCDC80,POSTN,LRRN3,MOXD1,NKD1,DKK1,OSR1,ATP2B4,DKK2,H19,ADAM19,INHBA,GAS1,GAS2,GATA3,GBP1,PDE10A,GDF10,DCX,BGN,OLFML1,SULF1,CCDC3,DLX2,IFI44L,PCBP4,SHANK1,GLIPR1,ZEB1,PCDHGB6,NT5E,MAMLD1,ADAMTS5,LPAR1,RGS4,EDNRA,ZNF503,TGFB2,TBX18,SEMA3D,NBPF15,HMCN1,FRMD6,GPR137C,SERTAD4,L…
Coexpression Atlas	gudmap_kidney_P0_JuxtaGlom_Ren1_500	kidney_P0_JuxtaGlom_Ren1_top-relative-expression-ranked_500	Gudmap Mouse MOE430.2	8.96e-18	3.512e-14	5.488e-16	4.857e-15	45	456	TPM2,VGLL3,PENK,ACTA2,MCAM,ACTG2,MYL9,FHL1,PLS3,CNN1,CAP2,FOXC2,COL8A1,COL12A1,FN1,RGS5,SOSTDC1,CCDC80,POSTN,IGFBP7,CCN2,LIMCH1,PRKG1,SNCG,DKK2,H19,MYH11,HTRA1,ARHGAP24,GAS2,GATA3,FJX1,BGN,NTM,NRK,CCDC3,KCNMB1,TAGLN,CACNA1C,KRT7,CALD1,EDNRA,TGFB2,SLC7A8,AADAT
Coexpression Atlas	Facebase_RNAseq_e8.5_Paraxial Mesoderm_1000	FacebaseRNAseq_e8.5_Paraxial Mesoderm_top-relative-expression-ranked_1000	FaceBase_RNAseq	9.532e-18	3.737e-14	5.749e-16	5.088e-15	67	967	IGSF8,TTYH1,EYA4,PDE4D,TENM2,ADCY2,ABCA9,MEIS2,KIAA1549L,SEMA5B,ALDH1A3,SLITRK6,MMP11,KIF17,LTBP4,IGLON5,FOXC1,COL6A3,COL8A1,COL9A2,MRAS,CHODL,RGS5,TNC,SGCD,OLFML2B,SOSTDC1,DPYSL4,ZFP14,APLP1,CCDC80,SP110,POSTN,IGFBP7,ZNF43,DLL3,OSR1,ATP2B4,DKK2,MYADM,HTRA1,INHBA,P4HA3,NCAM2,DCX,BGN,COL24A1,ST6GAL2,FBXL7,OLFML1,NFIB,NRK,CCDC3,ASTN2,MAFB,NNAT,WNK2,SHANK1,CACNA1C,KRT7,DTNA,MAMLD1,SEMA3D,THBS2,GPR13…
GO: Biological Process	GO:0048666	neuron development		1.802e-17	1.032e-13	5.16e-14	4.762e-13	93	1691	EPHB2,EPHB6,MAP2,MCAM,E2F7,NREP,CSMD3,TENM2,ADCY1,PICALM,FZD1,TUBB3,SEMA5B,SLITRK6,MAP4K4,KIF17,PLS3,MRTFA,CNTN1,FOXC1,FOXC2,TRIM46,SEMA3F,ISLR2,COL6A3,LRP12,SFRP1,COL12A1,FN1,CHODL,TNC,WNT7A,DPYSL4,APLP1,CCDC80,SLITRK3,CRABP2,CRMP1,WDR47,POSTN,DKK1,PRKG1,MIAT,SPOCK1,GAS1,GATA2,GATA3,PARD6G,NCAM2,TUBB2B,BRINP1,ZC4H2,DCX,SEPTIN2,NEFL,ANOS1,TUBA1A,NFIB,STMN3,NTM,NECTIN1,SYT1,MAFB,KIF3C,GPC2,GRIN3A,…
Coexpression Atlas	gudmap_dev lower uro neuro_e15.5_BladdPelvicGanglion_Sox10_1000	dev lower uro neuro_e15.5_BladdPelvicGanglion_Sox10_top-relative-expression-ranked_1000	Gudmap Mouse ST 1.0	1.845e-17	7.232e-14	1.096e-15	9.698e-15	61	828	EYA4,MAP2,ASIC2,TRAPPC5,PENK,ACTA2,ACTG2,FAM89B,CSMD3,NDRG3,REEP2,FABP5,TUBB3,TUBB4A,PGAP1,SLITRK6,PCDH10,CNN1,BIN1,MRAS,RGS5,DPYSL4,APLP1,CRIP2,AKAP12,CRMP1,POSTN,MOXD1,NSG1,SNCG,SNRPN,GATA3,P4HA3,NCAM2,TUBB2B,FJX1,MEIS3,ZC4H2,DCX,SEPTIN6,NEFL,CYRIA,TSPAN17,TUBA1A,SYT11,STMN3,NRK,ZNF558,SYT1,ASTN2,NNAT,PCBP4,NOVA1,CTXN1,DPYSL3,RGS4,NCS1,INA,VASH2,CDH2,ARHGAP19
Coexpression Atlas	PCBC_ratio_MESO-5_vs_MESO-15_cfr-2X-p05	Mesoderm Day 5_vs_Mesoderm Day 15-Confounder_removed-fold2.0_adjp0.05	PCBC_AltAnalyze	1.908e-17	7.479e-14	1.116e-15	9.88e-15	78	1276	EPHB2,TRAF5,MCAM,MCC,PLPPR3,MCM5,REEP2,SBK1,TUBB3,MEX3A,MYL9,SEMA5B,ANLN,PKM,FST,PCDH10,CAP2,FOXC1,COL4A1,SEMA3F,JCAD,KLF11,TEAD2,LRP12,COL9A2,SFRP1,TNC,PODXL,TUBB,STIL,CRABP2,ARL4D,TAF9B,CELF1,ISG15,GLIPR2,ITPRIP,RAB15,IL17RD,SNRPN,MYCL,MYADM,ARHGAP24,ADAM19,SPOCK1,GATA3,TUBB2B,SYNC,MEIS3,AIF1L,PDE10A,MELK,DENND2B,SEPTIN6,OLFML2A,TSPAN17,NUAK1,BUB1,KIF3C,GPC2,ST8SIA4,CTXN1,DTNA,DTX3,DUSP4,SAE1,Z…
Coexpression Atlas	gudmap_dev gonad_e11.5_M_GonMes_Sma_k3_1000	dev gonad_e11.5_M_GonMes_Sma_k-means-cluster#3_top-relative-expression-ranked_1000	Gudmap Mouse ST 1.0	1.941e-17	7.609e-14	1.119e-15	9.904e-15	37	311	TPM1,MAP2,MCC,ADCY2,TUBB4A,CNN1,CAP2,SFRP1,RGS5,TNC,CRABP2,RND3,POSTN,NKD1,NSG1,OSR1,GLIPR2,UHRF1,RASL11B,PRKG1,PARD6G,FJX1,NUAK1,OLFML1,NRK,ZNF558,MAFB,TAGLN,KRT7,CALD1,ADAMTS5,LPAR1,EDNRA,SEMA3D,LMNA,HMCN1,EGR2
Coexpression Atlas	gudmap_developingLowerUrinaryTract_P2_bladder detrusor (LCM)_500	DevelopingLowerUrinaryTract_P2_bladder detrusor (LCM)_emap-30376_top-relative-expression-ranked_500	Gudmap Mouse MOE430.2	2.457e-17	9.632e-14	1.396e-15	1.236e-14	41	388	TPM1,TPM2,PDE4D,ACTA2,ACTG2,TENM2,ABCA9,MYL9,SLITRK6,FHL1,PLN,HSPA2,CNN1,CAP2,COL8A1,CDC42EP3,SMTN,SCUBE2,PDE5A,DKK3,MYH11,MYLK,GBP1,PTHLH,BGN,CYRIA,TSPAN17,ARHGEF9,KCNMB1,TAGLN,GLIPR1,NIPAL4,CALD1,NT5E,DTNA,ACTR3B,TTLL7,MSRB3,TBX18,THBS2,PLEKHO1
Coexpression Atlas	gudmap_developingLowerUrinaryTract_e14.5_ Genital tubercle M_1000	DevelopingLowerUrinaryTract_e14.5_ Genital tubercle M_emap-6706_top-relative-expression-ranked_1000	Gudmap Mouse MOE430.2	2.916e-17	1.143e-13	1.633e-15	1.445e-14	61	836	VGLL3,EYA4,PDE4D,CTTNBP2,MAP2,BACH2,RCBTB2,TENM2,FBN2,CSRNP3,SLITRK6,FST,PCDH10,UBE2E3,MEX3B,COL8A1,LRP12,COL9A1,TNC,SOSTDC1,RND3,DKK1,LYPD3,GIGYF2,PDE5A,LIMCH1,DKK2,SERPINB7,SPOCK1,INHBA,GAS2,MARCKSL1,NEFL,COL24A1,ST6GAL2,CYRIA,SULF1,NFIB,NTM,NRK,ARHGEF9,DLX2,ST8SIA4,DPYSL3,NT5E,PCDHB10,GAL3ST4,TFAP2A,LPAR1,EDNRA,TGFB2,TBX18,SEMA3D,HMCN1,FRMD6,SERTAD4,PAK3,GREM1,CDH2,TPBG,EPHA3
Coexpression Atlas	JC_fibro_1000	JC_fibro_top-relative-expression-ranked_1000	PCBC	3.163e-17	1.24e-13	1.746e-15	1.546e-14	67	990	CPA4,TPM2,VGLL3,RHOJ,PENK,ACTA2,NREP,MYL9,HOXD11,EVA1A,FHL1,MARCHF4,HSPA2,CNN1,COL6A3,COL8A1,COL12A1,FN1,SGCD,CCDC80,IFIT1,CDC42EP3,RND3,MOXD1,DKK1,IGFBP7,ISG15,PDE5A,CCN2,LIMCH1,IFI6,DKK3,SERPINB7,SAMD9,MYLK,INHBA,GAS1,GATA2,GBP1,P4HA3,SYNC,BRINP1,SLFN5,BGN,OLFML1,SULF1,IFI44L,TAGLN,GPC1,KRT7,NIPAL4,CALD1,UACA,NT5E,MAMLD1,PSCA,ADAMTS5,TFAP2A,LPAR1,SEMA3D,THBS2,C1orf198,FRMD6,EGR2,TLE4,LTBP2,GREM1
Coexpression Atlas	Facebase_RNAseq_e9.5_Maxillary Arch_1000	FacebaseRNAseq_e9.5_Maxillary Arch_top-relative-expression-ranked_1000	FaceBase_RNAseq	3.684e-17	1.444e-13	1.978e-15	1.751e-14	66	967	IGSF8,EYA4,PDE4D,HSPBP1,TENM2,ADCY2,MEIS2,KIAA1549L,SEMA5B,PKM,ALDH1A3,SLITRK6,MMP11,LTBP4,IGLON5,RBM38,FOXC1,COL6A3,COL8A1,COL9A1,COL9A2,MRAS,CHODL,RGS5,TNC,OLFML2B,SOSTDC1,DPYSL4,CCDC80,SP110,POSTN,MOXD1,IGFBP7,ZNF43,OSR1,LIMCH1,IL17RD,ATP2B4,DKK2,HTRA1,INHBA,GATA3,P4HA3,NCAM2,LAMP5,DCX,BGN,COL24A1,OLFML1,NFIB,NRK,CCDC3,ASTN2,DLX2,NNAT,PCBP4,WNK2,SHANK1,CACNA1C,KRT7,DTNA,MAMLD1,SEMA3D,THBS2,SEN…
Coexpression Atlas	Facebase_RNAseq_ratio_e9.5_MandibularArch_vs_MaxillaryArch_1000	FacebaseRNAseq_ratio_e9.5_MandibularArch_vs_MaxillaryArch_top-relative-expression-ranked_1000	FaceBase_RNAseq	3.684e-17	1.444e-13	1.978e-15	1.751e-14	66	967	IGSF8,TTYH1,EYA4,PDE4D,ACTA2,TENM2,ADCY2,MEIS2,KIAA1549L,SEMA5B,SLITRK6,MMP11,KIF17,LTBP4,IGLON5,COL6A3,COL8A1,COL9A2,MRAS,CHODL,RGS5,TNC,SGCD,OLFML2B,SOSTDC1,DPYSL4,APLP1,CCDC80,SP110,POSTN,IGFBP7,ZNF43,OSR1,RAB15,ATP2B4,DKK2,MYADM,HTRA1,ARHGAP24,INHBA,P4HA3,NCAM2,DCX,BGN,COL24A1,ST6GAL2,FBXL7,OLFML1,NFIB,NRK,CCDC3,ASTN2,MAFB,TAGLN,WNK2,SHANK1,CACNA1C,KRT7,DTNA,MAMLD1,TGFB2,SEMA3D,THBS2,GPR137C,…
Coexpression	MM1066	PASINI_SUZ12_TARGETS_DN	M2:CGP: Chemical and Genetic Perturbations	4.032e-17	3.758e-13	1.342e-14	1.304e-13	34	322	TPM1,TPM2,VGLL3,BACH2,ACTA2,NREP,AMOTL2,SDC1,CNN1,FN1,POU3F1,CRMP1,RND3,GLIPR2,DCBLD2,MYADM,DOCK11,GBP1,AIF1L,NEFL,NUAK1,TUBA1A,SYT11,SULF1,TAGLN,CTXN1,CALD1,NT5E,NCS1,TGFB2,SERTAD4,PWWP3B,CDH2,PHLDB2
Coexpression	M42501	FOROUTAN_TGFB_EMT_UP	C2:CGP: Chemical and Genetic Perturbations	5.515e-17	5.141e-13	1.773e-14	1.723e-13	27	192	TPM1,EPHB2,VGLL3,NREP,MYL9,COL4A1,COL6A3,FN1,PODXL,POSTN,IGFBP7,CCN2,HTRA1,ADAM19,SPOCK1,INHBA,PTHLH,NUAK1,TUBA1A,TAGLN,GLIPR1,CALD1,NT5E,RGS4,GREM1,DHRS2,CDH2
Coexpression Atlas	gudmap_developingLowerUrinaryTract_e13.5_bladder mesenchyme_500	DevelopingLowerUrinaryTract_e13.5_bladder mesenchyme_emap-3087_top-relative-expression-ranked_500	Gudmap Mouse MOE430.2	7.313e-17	2.867e-13	3.874e-15	3.429e-14	42	420	TPM1,TRAF5,VGLL3,ACTA2,MCC,ACTG2,RCBTB2,FZD1,MYL9,SLITRK6,CNN1,KLF11,SFRP1,PODXL,RND3,CYYR1,OSR1,PDE5A,LIMCH1,DCBLD2,DKK3,MYH11,GBP1,C11orf87,BRINP1,NEFL,CYRIA,SULF1,SGCE,TAGLN,GLIPR1,UACA,ACTR3B,CDCA8,RGS4,MSRB3,TGFB2,TBX18,THBS2,EGR2,CDH2,RBFOX2
Coexpression	M19432	MCBRYAN_PUBERTAL_BREAST_4_5WK_UP	C2:CGP: Chemical and Genetic Perturbations	9.564e-17	8.916e-13	2.893e-14	2.811e-13	31	270	ACTA2,ACTG2,PROM2,UPK3A,SDC1,CNN1,CNTN1,TEAD2,COL9A1,SFRP1,FN1,TNC,SESN3,RND3,DKK3,HTRA1,GAS1,GATA3,MARCKSL1,MAFB,ZNF704,DDR1,KRT7,DPYSL3,CALD1,ZBTB8A,ADAMTS5,THBS2,EGR2,TNFAIP2,TPBG
Coexpression	M39269	HU_FETAL_RETINA_RGC	C8: Cell Type Signature	9.621e-17	8.968e-13	2.893e-14	2.811e-13	39	443	MAP2,ADCY1,FABP5,SBK1,FHL1,ISLR2,TUBB,DPYSL4,APLP1,CRABP2,CRIP2,CRMP1,WDR47,RND3,LRRN3,NSG1,DLL3,SNCG,MIAT,TCEAL7,TUBB2B,MEIS3,DCX,NEFL,TUBA1A,STMN3,SYT1,NKAIN1,KIF3C,WASF1,RAB6A,NOVA2,DPYSL3,STMN1,INA,TLE4,PBX3,TOX2,RBFOX2
GO: Biological Process	GO:0000902	cell morphogenesis		1.007e-16	5.764e-13	1.921e-13	1.774e-12	80	1356	TPM1,EPHB2,EPHB6,MAP2,RHOJ,DACT2,E2F7,TENM2,ADCY1,PICALM,TUBB3,SEMA5B,UPK3A,SLITRK6,AMOTL2,MAP4K4,PLS3,CAP2,CNTN1,FOXC1,FOXC2,TRIM46,SEMA3F,ISLR2,COL6A3,FN1,CHODL,TNC,WNT7A,DPYSL4,APLP1,CCDC80,SLITRK3,CRABP2,CDC42EP3,AKAP12,CRMP1,WDR47,POSTN,DKK1,PRKG1,GAS1,GAS2,GATA3,PARD6G,TUBB2B,DCX,NEFL,ANOS1,TUBA1A,NFIB,NECTIN1,SYT1,TAGLN,WASF1,NOVA1,NOVA2,SHANK1,DDR1,DPYSL3,STMN1,LPAR1,RGS4,GSK3B,EDNRA,TGFB…
Coexpression	M39065	MANNO_MIDBRAIN_NEUROTYPES_HRN	C8: Cell Type Signature	1.356e-16	1.264e-12	3.95e-14	3.838e-13	34	335	MAP2,NREP,TENM2,SBK1,TUBB3,ISLR2,POU3F1,APLP1,CDC42EP3,CRMP1,RND3,NSG1,SNCG,MIAT,TUBB2B,DCX,ST6GAL2,NKAIN1,KIF3C,GPC2,GRIN3A,NNAT,NOVA1,DPYSL3,DUSP4,STMN1,ADAMTS5,MSANTD3-TMEFF1,INA,VASH2,PAK3,PBX3,EPB41,RBFOX2
Coexpression Atlas	gudmap_developingLowerUrinaryTract_P1_bladder_500_J	DevelopingLowerUrinaryTract_P1_bladder_J_emap-30374_top-relative-expression-ranked_500	Gudmap Mouse MOE430.2	1.448e-16	5.676e-13	7.568e-15	6.698e-14	40	388	TPM1,TPM2,VGLL3,ACTA2,ACTG2,TENM2,TUBB3,MYL9,PROM2,UPK3A,FHL1,CNN1,COL8A1,RGS5,CDC42EP3,SMTN,SCUBE2,LYPD3,CCN2,DKK3,MYH11,MYLK,GBP1,C11orf87,DCX,PTHLH,NEFL,CYRIA,STMN3,TAGLN,GLIPR1,KRT7,NIPAL4,CALD1,NT5E,PSCA,MSRB3,THBS2,ENTPD3,TNFAIP2
Coexpression Atlas	gudmap_developingGonad_e11.5_ovary + mesonephros_1000	DevelopingGonad_e11.5_ovary + mesonephros_emap-3226_top-relative-expression-ranked_1000	Gudmap Mouse MOE430.2	1.471e-16	5.765e-13	7.586e-15	6.714e-14	59	815	TPM1,CTTNBP2,HMMR,MEIS2,CNOT6,SBK1,TUBB3,CSRNP3,PKM,FST,MEX3B,FOXC1,FOXC2,COL9A1,SFRP1,STARD4,SFSWAP,RGS5,DPYSL4,CRABP2,CRMP1,RND3,DKK1,ZNF43,SCMH1,DLL3,GLIPR2,GIGYF2,PRKG1,SNCG,MIAT,DOCK11,RBM26,AIF1L,PDE10A,DCX,NEFL,ST6GAL2,RBMS3,NFIB,STMN3,NRK,SGCE,PCBP4,DNMT3A,DPYSL3,CALD1,RGS4,GSK3B,EDNRA,LSM12,TBX18,KATNBL1,PAK3,PSME3,R3HDM1,CDH2,RBFOX2,SENP7
Coexpression	M2293	PASINI_SUZ12_TARGETS_DN	C2:CGP: Chemical and Genetic Perturbations	1.65e-16	1.538e-12	4.662e-14	4.53e-13	33	316	TPM1,TPM2,VGLL3,BACH2,ACTA2,NREP,AMOTL2,SDC1,CNN1,FN1,POU3F1,CRMP1,RND3,GLIPR2,DCBLD2,MYADM,DOCK11,AIF1L,NEFL,NUAK1,TUBA1A,SYT11,SULF1,TAGLN,CTXN1,CALD1,NT5E,NCS1,TGFB2,SERTAD4,PWWP3B,CDH2,PHLDB2
Coexpression Atlas	gudmap_developingGonad_e11.5_testes and mesonephros_1000	DevelopingGonad_e11.5_testes and mesonephros_emap-3226_top-relative-expression-ranked_1000	Gudmap Mouse MOE430.2	1.835e-16	7.194e-13	9.342e-15	8.269e-14	60	844	RAMP2,CADM4,BACH2,HLX,FAM89B,HMMR,CNOT6,SBK1,TUBB3,MEX3A,PKM,FKBP1A,SDC1,MEX3B,FOXC1,FOXC2,COL9A1,SFRP1,SFSWAP,RGS5,SESN3,DPYSL4,APLP1,CRABP2,CRMP1,RND3,NKD1,ZFP64,DLL3,GLIPR2,SNRPN,ADAM19,GAS1,RBM26,TUBB2B,FJX1,MEIS3,DCX,NEFL,SYT11,NFIB,STMN3,NKAIN1,NNAT,PCBP4,CTXN1,DDR1,DPYSL3,CALD1,CAMK2G,GAL3ST4,GSK3B,EDNRA,ZNF503,INA,PSME3,PLEKHO1,SMAD1,RBFOX2,EPHA3
Coexpression	M13867	ONDER_CDH1_TARGETS_2_UP	C2:CGP: Chemical and Genetic Perturbations	1.915e-16	1.785e-12	5.251e-14	5.103e-13	30	257	TPM1,EPHB2,ACTA2,NREP,MYL9,COL6A3,COL8A1,BIN1,FN1,PODXL,CRIP2,POSTN,MOXD1,TAF9B,IGFBP7,CCN2,SPOCK1,SEPTIN6,BGN,ANOS1,SYT11,TAGLN,DPYSL3,ZEB1,TSC22D3,LPAR1,RGS4,LTBP2,GREM1,CDH2
Coexpression Atlas	gudmap_developingKidney_e15.5_Ureteral Smooth Musc_500	DevelopingKidney_e15.5_Ureteral Smooth Musc_emap-28812_top-relative-expression-ranked_500	Gudmap Mouse MOE430.2	2.255e-16	8.839e-13	1.121e-14	9.919e-14	40	393	TPM2,TRAF5,EYA4,ACTA2,ACTG2,FZD1,KIAA1549L,MYL9,FST,CNN1,CAP2,CNTN1,COL6A3,COL9A1,POU3F1,SCMH1,GIGYF2,PDE5A,DKK3,MYH11,MYLK,GATA2,GBP1,GDF10,CYRIA,SULF1,NFIB,SYT1,TAGLN,ST8SIA4,GLIPR1,CALD1,NT5E,MSRB3,TBX18,R3HDM1,PBX3,RBFOX2,TPBG,RASD2
Coexpression Atlas	gudmap_dev gonad_e11.5_F_GonadVasMes_Flk_k3_1000	dev gonad_e11.5_F_GonadVasMes_Flk_k-means-cluster#3_top-relative-expression-ranked_1000	Gudmap Mouse ST 1.0	2.258e-16	8.853e-13	1.121e-14	9.919e-14	38	354	TPM1,MCC,NREP,ADCY2,MEIS2,FBN2,MEX3A,SLITRK6,MEX3B,CNN1,CAP2,SFRP1,RGS5,CRABP2,RND3,POSTN,NKD1,OSR1,UHRF1,PRKG1,INHBA,PARD6G,BGN,OLFML1,RBMS3,NFIB,NRK,ZNF558,NNAT,KRT7,CALD1,LPAR1,EDNRA,TGFB2,HMCN1,EGR2,PBX3,ARMH4
GO: Biological Process	GO:0061564	axon development		2.277e-16	1.304e-12	3.259e-13	3.008e-12	58	789	EPHB2,EPHB6,MAP2,MCAM,E2F7,NREP,TENM2,ADCY1,PICALM,TUBB3,SEMA5B,SLITRK6,PLS3,CNTN1,FOXC1,FOXC2,TRIM46,SEMA3F,ISLR2,COL6A3,COL12A1,FN1,CHODL,TNC,WNT7A,APLP1,CCDC80,SLITRK3,CRABP2,CRMP1,WDR47,PRKG1,GAS1,GATA3,PARD6G,NCAM2,TUBB2B,DCX,NEFL,ANOS1,NFIB,NECTIN1,NOVA1,NOVA2,DDR1,DPYSL3,STMN1,RGS4,GSK3B,EDNRA,TGFB2,PLEKHG4B,SEMA3D,EGR2,VASH2,PAK3,CDH2,EPHA3
Coexpression Atlas	ratio_EB_vs_SC_1000_K1	ratio_EmbryoidBody_vs_StemCell_top-relative-expression-ranked_1000_k-means-cluster#1	PCBC	2.484e-16	9.736e-13	1.217e-14	1.077e-13	37	336	CPA4,CDKN2A,RHOJ,HLX,MEIS2,ARHGAP29,FOXC1,FOXC2,JCAD,COL6A3,COL8A1,COL12A1,FN1,CCDC80,POSTN,DKK1,IGFBP7,OSR1,ARHGAP24,INHBA,GBP1,P4HA3,GDF10,BGN,SULT1E1,OLFML1,RBMS3,SULF1,GLIPR1,ZEB1,RGS4,MSRB3,TGFB2,TBX18,SERTAD4,LTBP2,GREM1
Coexpression	M39018	FAN_EMBRYONIC_CTX_BIG_GROUPS_BRAIN_ENDOTHELIAL	C8: Cell Type Signature	2.802e-16	2.612e-12	7.462e-14	7.251e-13	35	365	TPM2,RAMP2,RHOJ,MCAM,MYL9,ARHGAP29,FKBP1A,FOXC1,COL4A1,JCAD,FN1,RGS5,PODXL,ID3,CRIP2,SMTN,IGFBP7,ISG15,CYYR1,IFI6,BGN,RBMS3,CCDC3,IFI44L,ZEB1,CALD1,UACA,PLXDC1,EDNRA,MSRB3,SLC7A8,LMNA,TJP1,SLC7A5,LY6E
Coexpression	M39073	MANNO_MIDBRAIN_NEUROTYPES_HOMTN	C8: Cell Type Signature	3.194e-16	2.978e-12	8.271e-14	8.038e-13	36	389	MAP2,BACH2,CSMD3,TENM2,ADCY1,ADCY2,TUBB3,CAP2,APLP1,CRMP1,LRRN3,NSG1,RAB15,SNCG,FAM131B,B4GALNT1,C11orf87,TUBB2B,DCX,SEPTIN6,NEFL,TUBA1A,RBMS3,STMN3,GPC2,PCBP4,CACNA1C,DPYSL3,STMN1,SEMA3D,PIANP,MSANTD3-TMEFF1,INA,TLE4,RBFOX2,EPHA3
Coexpression	MM987	MCBRYAN_PUBERTAL_BREAST_4_5WK_UP	M2:CGP: Chemical and Genetic Perturbations	4.445e-16	4.144e-12	1.12e-13	1.088e-12	31	285	ACTA2,ACTG2,PROM2,UPK3A,SDC1,CNN1,CNTN1,TEAD2,COL9A1,SFRP1,FN1,TNC,SESN3,RND3,DKK3,HTRA1,GAS1,GATA3,MARCKSL1,MAFB,ZNF704,DDR1,KRT7,DPYSL3,CALD1,ZBTB8A,ADAMTS5,THBS2,EGR2,TNFAIP2,TPBG
Coexpression	M40158	DESCARTES_FETAL_CEREBELLUM_VASCULAR_ENDOTHELIAL_CELLS	C8: Cell Type Signature	4.81e-16	4.484e-12	1.18e-13	1.147e-12	46	644	RAMP2,ACTA2,DACT2,MCAM,HLX,MYL9,ARHGAP29,KIF17,FKBP1A,PLS3,FOXC1,FOXC2,COL4A1,JCAD,FN1,RGS5,PODXL,ID3,IFIT1,CRIP2,SMTN,IGFBP7,ISG15,LYPD3,CCN2,IFI6,GATA2,GBP1,SLFN5,BGN,SULT1E1,OLFML2A,OLFML1,CCDC3,TAGLN,CALD1,UACA,PLXDC1,TSC22D3,TAMALIN,EDNRA,ZNF503,TBX18,SLC7A5,PHLDB2,RASD2
Coexpression	M39064	MANNO_MIDBRAIN_NEUROTYPES_HNBML1	C8: Cell Type Signature	4.986e-16	4.648e-12	1.192e-13	1.158e-12	33	328	MAP2,PLPPR3,NREP,CSMD3,SBK1,TUBB3,CSRNP3,ISLR2,BIN1,WNT7A,POU3F1,CRMP1,NSG1,MIAT,TUBB2B,DCX,CYRIA,NUAK1,TUBA1A,KIF3C,GPC2,GRIN3A,NNAT,PCBP4,DPYSL3,STMN1,MSANTD3-TMEFF1,INA,CCBE1,VASH2,PAK3,EPB41,RBFOX2
Coexpression Atlas	gudmap_dev lower uro neuro_e15.5_BladdPelvicGanglion_Sox10_500	dev lower uro neuro_e15.5_BladdPelvicGanglion_Sox10_top-relative-expression-ranked_500	Gudmap Mouse ST 1.0	5.204e-16	2.04e-12	2.519e-14	2.229e-13	41	423	MAP2,ASIC2,PENK,ACTG2,CSMD3,TUBB3,TUBB4A,SLITRK6,PCDH10,CNN1,MRAS,RGS5,CRIP2,CRMP1,POSTN,NSG1,SNCG,SNRPN,GATA3,P4HA3,NCAM2,TUBB2B,FJX1,MEIS3,DCX,NEFL,CYRIA,TSPAN17,SYT11,STMN3,NRK,SYT1,ASTN2,NNAT,PCBP4,NOVA1,CTXN1,DPYSL3,RGS4,NCS1,INA
Coexpression Atlas	Facebase_RNAseq_e9.5_Facial Mesenchyne_1000	FacebaseRNAseq_e9.5_Facial Mesenchyne_top-relative-expression-ranked_1000	FaceBase_RNAseq	5.469e-16	2.144e-12	2.614e-14	2.314e-13	64	968	IGSF8,TTYH1,EYA4,PDE4D,TENM2,ADCY2,MEIS2,KIAA1549L,SEMA5B,SLITRK6,MMP11,LTBP4,IGLON5,RBM38,FOXC1,COL6A3,COL8A1,COL9A2,MRAS,CHODL,RGS5,TNC,OLFML2B,SOSTDC1,DPYSL4,APLP1,CCDC80,CRABP2,SP110,POSTN,IGFBP7,ZNF43,OSR1,LIMCH1,IL17RD,ATP2B4,DKK2,HTRA1,INHBA,P4HA3,NCAM2,LAMP5,DCX,BGN,COL24A1,ST6GAL2,OLFML1,NFIB,NRK,CCDC3,ASTN2,NNAT,PCBP4,WNK2,SHANK1,CACNA1C,KRT7,DTNA,MAMLD1,TFAP2A,SEMA3D,THBS2,SENP7,EPHA3
Coexpression	M6100	SENESE_HDAC1_TARGETS_DN	C2:CGP: Chemical and Genetic Perturbations	5.502e-16	5.129e-12	1.282e-13	1.246e-12	30	267	EPHB2,TTYH1,NREP,MYL9,SDC1,CNN1,COL12A1,SESN3,APLP1,CDC42EP3,CRMP1,IFI6,MIAT,DKK3,MYLK,PCDHB5,TUBB2B,SYNC,SEPTIN6,TUBA1A,STMN3,KLRK1-AS1,KRT7,PCDHB10,ZNF503,TGFB2,NARF,GPR137C,DHRS2,PHLDB2
GO: Biological Process	GO:0120039	plasma membrane bounded cell projection morphogenesis		7.313e-16	4.187e-12	8.374e-13	7.73e-12	64	963	EPHB2,EPHB6,MAP2,E2F7,TENM2,ADCY1,PICALM,TUBB3,SEMA5B,SLITRK6,MAP4K4,PLS3,CNTN1,FOXC1,FOXC2,TRIM46,SEMA3F,ISLR2,COL6A3,FN1,CHODL,TNC,WNT7A,DPYSL4,APLP1,CCDC80,SLITRK3,CRABP2,CRMP1,WDR47,POSTN,PRKG1,GAS1,GATA3,PARD6G,TUBB2B,DCX,NEFL,ANOS1,TUBA1A,NFIB,NECTIN1,SYT1,WASF1,NOVA1,NOVA2,SHANK1,DDR1,DPYSL3,STMN1,RGS4,GSK3B,EDNRA,TGFB2,PLEKHG4B,SEMA3D,INA,EGR2,PAK3,CDH2,PLEKHO1,RBFOX2,TPBG,EPHA3
Coexpression Atlas	gudmap_developingLowerUrinaryTract_e14.5_ urethra_500	DevelopingLowerUrinaryTract_e14.5_ urethra_emap-30892_top-relative-expression-ranked_500	Gudmap Mouse MOE430.2	7.507e-16	2.943e-12	3.546e-14	3.138e-13	40	407	EYA4,CTTNBP2,BACH2,ACTA2,ACTG2,TRIM29,TENM2,SLITRK6,PCDH10,CAP2,SEMA3F,TNC,DPYSL4,ZKSCAN1,CYYR1,OSR1,GIGYF2,PDE5A,DKK3,TCEAL7,MYH11,MYLK,SPOCK1,GATA3,PARD6G,DCX,NEFL,CYRIA,SULF1,NRK,ARHGEF9,GRIN3A,ST8SIA4,DPYSL3,TFAP2A,MSRB3,ENTPD3,RBFOX2,EPHA3,ARMH4
Coexpression Atlas	DevelopingLowerUrinaryTract_e14.5_ urethra_emap-30902_500	DevelopingLowerUrinaryTract_e14.5_ urethra_emap-30902_top-relative-expression-ranked_500	Gudmap Mouse MOE430.2	8.164e-16	3.2e-12	3.81e-14	3.372e-13	40	408	CTTNBP2,ACTA2,ACTG2,TRIM29,TENM2,CSRNP3,SLITRK6,PCDH10,CNN1,CAP2,SEMA3F,COL8A1,TNC,CRMP1,CELF1,ZKSCAN1,LYPD3,GIGYF2,PDE5A,PRKG1,DCBLD2,DKK2,MYH11,MYLK,SPOCK1,PARD6G,DCX,NEFL,ST6GAL2,STMN3,NRK,ST8SIA4,TFAP2A,EDNRA,MSRB3,SEMA3D,INA,ENTPD3,RBFOX2,EPHA3
Coexpression Atlas	gudmap_developingKidney_e14.5 whole kidney - Wnt4 KO_500	DevelopingKidney_e14.5 whole kidney - Wnt4 KO_emap-6674_top-relative-expression-ranked_500	Gudmap Mouse MOE430.2	8.282e-16	3.247e-12	3.82e-14	3.381e-13	39	388	TPM1,TPM2,VGLL3,MAP2,RCBTB2,ADCY2,MEIS2,FBN2,CSRNP3,MMP11,COL6A3,SFRP1,CRABP2,RND3,MOXD1,NKD1,PDE5A,DOCK11,GATA2,DCX,SULT1E1,SULF1,NFIB,NTM,SYT1,NNAT,ST8SIA4,EHBP1,DPYSL3,CALD1,LSM12,TGFB2,TBX18,SEMA3D,HMCN1,SERTAD4,PWWP3B,LY6H,CDH2
Coexpression	M10605	BERTUCCI_MEDULLARY_VS_DUCTAL_BREAST_CANCER_DN	C2:CGP: Chemical and Genetic Perturbations	1.083e-15	1.01e-11	2.463e-13	2.393e-12	25	180	TPM2,ACTA2,ACTG2,KATNAL1,PICALM,MYL9,FHL1,COL8A1,RGS5,SMTN,PDE5A,SNRPN,H19,MYLK,SPOCK1,BGN,KCNMB1,TAGLN,GPC1,CALD1,UACA,RGS4,EDNRA,MSRB3,EPHA3
GO: Biological Process	GO:0048812	neuron projection morphogenesis		1.095e-15	6.269e-12	9.325e-13	8.607e-12	63	945	EPHB2,EPHB6,MAP2,E2F7,TENM2,ADCY1,PICALM,TUBB3,SEMA5B,SLITRK6,MAP4K4,PLS3,CNTN1,FOXC1,FOXC2,TRIM46,SEMA3F,ISLR2,COL6A3,FN1,CHODL,TNC,WNT7A,DPYSL4,APLP1,CCDC80,SLITRK3,CRABP2,CRMP1,WDR47,POSTN,PRKG1,GAS1,GATA3,PARD6G,TUBB2B,DCX,NEFL,ANOS1,TUBA1A,NFIB,NECTIN1,SYT1,WASF1,NOVA1,NOVA2,SHANK1,DDR1,DPYSL3,STMN1,RGS4,GSK3B,EDNRA,TGFB2,PLEKHG4B,SEMA3D,INA,EGR2,PAK3,CDH2,RBFOX2,TPBG,EPHA3
GO: Biological Process	GO:0048858	cell projection morphogenesis		1.14e-15	6.528e-12	9.325e-13	8.607e-12	64	972	EPHB2,EPHB6,MAP2,E2F7,TENM2,ADCY1,PICALM,TUBB3,SEMA5B,SLITRK6,MAP4K4,PLS3,CNTN1,FOXC1,FOXC2,TRIM46,SEMA3F,ISLR2,COL6A3,FN1,CHODL,TNC,WNT7A,DPYSL4,APLP1,CCDC80,SLITRK3,CRABP2,CRMP1,WDR47,POSTN,PRKG1,GAS1,GATA3,PARD6G,TUBB2B,DCX,NEFL,ANOS1,TUBA1A,NFIB,NECTIN1,SYT1,WASF1,NOVA1,NOVA2,SHANK1,DDR1,DPYSL3,STMN1,RGS4,GSK3B,EDNRA,TGFB2,PLEKHG4B,SEMA3D,INA,EGR2,PAK3,CDH2,PLEKHO1,RBFOX2,TPBG,EPHA3
Coexpression	M7550	GSE21546_UNSTIM_VS_ANTI_CD3_STIM_SAP1A_KO_DP_THYMOCYTES_UP	C7:IMMUNESIGDB: ImmuneSigDB	1.154e-15	1.076e-11	2.562e-13	2.49e-12	26	198	ACTA2,NREP,TRIM22,PICALM,EVA1A,AMOTL2,CAP2,FOXC1,FN1,WDR47,RND3,ARHGDIB,ATP2B4,DKK2,ADAM19,GAS2,NCAM2,SULT1E1,NUAK1,TAGLN,SLC12A6,NT5E,TGFB2,THBS2,IFT52,PHLDB2
Coexpression Atlas	gudmap_developingKidney_e13.5_podocyte cells_1000	DevelopingKidney_e13.5_podocyte cells_emap-27773_top-relative-expression-ranked_1000	Gudmap Mouse MOE430.2	1.29e-15	5.058e-12	5.881e-14	5.206e-13	59	855	VGLL3,EYA4,ASIC2,E2F7,TENM2,ADCY1,ADCY2,ABCA9,CSRNP3,ARHGAP31,ALDH1A3,CNTN1,FOXC1,FOXC2,COL9A1,COL13A1,PODXL,WT1,POU3F1,CRMP1,POSTN,DKK1,CYYR1,GLIPR2,LIMCH1,IL17RD,DKK3,DKK2,ADAM19,SPOCK1,GAS2,C11orf87,BRINP1,AIF1L,GDF10,DCX,NEFL,COL24A1,CYRIA,OLFML1,NTM,CCDC3,MAFB,GRIN3A,HDGFL2,DNMT3A,CACNA1C,ZFP90,GAL3ST4,RGS4,NCS1,TTLL7,TBX18,THBS2,VASH2,ENTPD3,TNFAIP2,CDH2,EPHA3
Coexpression	M39176	MURARO_PANCREAS_ENDOTHELIAL_CELL	C8: Cell Type Signature	1.411e-15	1.315e-11	3.058e-13	2.971e-12	34	362	RAMP2,RHOJ,MCAM,HLX,FABP5,ARHGAP31,ARHGAP29,FKBP1A,COL4A1,COL13A1,RGS5,PODXL,ID3,ARHGDIB,IGFBP7,CYYR1,ITPRIP,DKK3,HTRA1,MYLK,GATA2,MARCKSL1,BGN,OLFML2A,ST8SIA4,NOVA2,DPYSL3,ZEB1,SASH1,UACA,ZNF503,CDK2AP1,ZNF532,PLEKHO1
Coexpression	M39068	MANNO_MIDBRAIN_NEUROTYPES_HDA1	C8: Cell Type Signature	1.577e-15	1.47e-11	3.342e-13	3.248e-12	43	584	PDE4D,MAP2,ASIC2,NREP,CSMD3,ADCY1,ADCY2,SBK1,TUBB3,KIAA1549L,CSRNP3,CNTN1,APLP1,CRMP1,WDR47,NSG1,MIAT,SPOCK1,TUBB2B,DCX,NECTIN1,KIF3C,GPC2,GRIN3A,NNAT,WASF1,EHBP1,CACNA1C,DPYSL3,DUSP4,NCS1,OPRK1,MSANTD3-TMEFF1,INA,CCBE1,VASH2,SERTAD4,PAK3,PBX3,TOX2,EPB41,RBFOX2,ARMH4
Coexpression Atlas	gudmap_developingLowerUrinaryTract_e14.5_ urogenital sinus_500	DevelopingLowerUrinaryTract_e14.5_ urogenital sinus_emap-5517_top-relative-expression-ranked_500	Gudmap Mouse MOE430.2	1.582e-15	6.2e-12	7.127e-14	6.308e-13	40	416	EYA4,BACH2,TENM2,TUBB3,PCDH10,COL8A1,COL9A1,SFRP1,DPYSL4,ZKSCAN1,CYYR1,OSR1,PDE5A,PRKG1,DKK3,SPOCK1,INHBA,GATA3,PARD6G,C11orf87,NCAM2,TUBB2B,BRINP1,GDF10,DCX,NEFL,SULF1,STMN3,NTM,GRIN3A,NNAT,ST8SIA4,DPYSL3,RGS4,MSRB3,TGFB2,INA,ENTPD3,RBFOX2,EPHA3
Coexpression Atlas	gudmap_developingKidney_e15.5_Ureteral Smooth Musc_200_k3	DevelopingKidney_e15.5_Ureteral Smooth Musc_emap-28812_k-means-cluster#3_top-relative-expression-ranked_200	Gudmap Mouse MOE430.2	1.868e-15	7.324e-12	8.323e-14	7.367e-13	20	88	TPM2,EYA4,ACTA2,ACTG2,CNN1,CAP2,CNTN1,COL9A1,POU3F1,PDE5A,DKK3,MYH11,MYLK,CYRIA,TAGLN,ST8SIA4,NT5E,MSRB3,TBX18,TPBG
Coexpression Atlas	gudmap_developingLowerUrinaryTract_adult_bladder_500	DevelopingLowerUrinaryTract_adult_bladder_emap-29457_top-relative-expression-ranked_500	Gudmap Mouse MOE430.2	1.965e-15	7.703e-12	8.655e-14	7.66e-13	38	378	TPM2,VGLL3,ACTA2,ACTG2,ABCA9,MYL9,PROM2,UPK3A,SLITRK6,FHL1,PLN,CNN1,CAP2,COL8A1,RGS5,SMTN,SCUBE2,LYPD3,PDE5A,DKK3,MYH11,HTRA1,MYLK,GATA3,GBP1,PTHLH,TAGLN,KRT7,NIPAL4,CALD1,NT5E,DTNA,RGS4,TTLL7,MSRB3,THBS2,ENTPD3,TNFAIP2
Coexpression	M4995	LINDGREN_BLADDER_CANCER_CLUSTER_2B	C2:CGP: Chemical and Genetic Perturbations	1.983e-15	1.848e-11	4.107e-13	3.991e-12	35	389	TPM1,TPM2,ACTA2,MCAM,ACTG2,MYL9,AMOTL2,FHL1,COL6A3,STARD4,RGS5,TNC,PODXL,CCDC80,CDC42EP3,AKAP12,RND3,POSTN,MOXD1,IGFBP7,GLIPR2,CCN2,MIAT,DKK3,MYADM,ADAM19,MYLK,NUAK1,STMN3,MAFB,GLIPR1,TSC22D3,LCP1,EDNRA,THBS2
Coexpression Atlas	gudmap_dev gonad_e13.5_F_VascAssocMesenchStromOvary_MafB_k2_1000	dev gonad_e13.5_F_VascAssocMesenchStromOvary_MafB_k-means-cluster#2_top-relative-expression-ranked_1000	Gudmap Mouse ST 1.0	2.003e-15	7.852e-12	8.724e-14	7.722e-13	32	265	TPM1,RHOJ,ACTA2,NREP,ADCY2,FBN2,LTBP4,CAP2,COL6A3,SFRP1,RGS5,SGCD,RND3,POSTN,OSR1,ATP2B4,INHBA,BGN,OLFML1,NFIB,NRK,ZNF558,SGCE,NNAT,CALD1,LPAR1,EDNRA,TGFB2,SEMA3D,HMCN1,EGR2,EPHA3
Coexpression	M42503	FOROUTAN_PRODRANK_TGFB_EMT_UP	C2:CGP: Chemical and Genetic Perturbations	2.085e-15	1.944e-11	4.226e-13	4.107e-12	25	185	TPM1,EPHB2,NREP,MYL9,COL4A1,FN1,PODXL,POSTN,IGFBP7,CCN2,HTRA1,ADAM19,SPOCK1,INHBA,PTHLH,NUAK1,TUBA1A,TAGLN,GLIPR1,CALD1,NT5E,RGS4,GREM1,DHRS2,CDH2
Coexpression Atlas	gudmap_dev gonad_e13.5_F_VascAssocMesenchStromOvary_MafB_1000	dev gonad_e13.5_F_VascAssocMesenchStromOvary_MafB_top-relative-expression-ranked_1000	Gudmap Mouse ST 1.0	2.307e-15	9.044e-12	9.939e-14	8.797e-13	54	740	TPM1,MAP2,RHOJ,ACTA2,NREP,ADCY2,FBN2,MYL9,ARHGAP29,FST,LTBP4,CAP2,COL6A3,SFRP1,COL12A1,RGS5,SGCD,PODXL,WT1,SESN3,CCDC80,RND3,POSTN,NKD1,SCMH1,NSG1,OSR1,ATP2B4,H19,MYH11,HTRA1,INHBA,DENND2B,BGN,OLFML1,SULF1,NFIB,NRK,ZNF558,SGCE,NNAT,WASF1,CALD1,PLXDC1,LPAR1,EDNRA,TGFB2,SEMA3D,THBS2,HMCN1,FRMD6,EGR2,PBX3,EPHA3
Coexpression Atlas	gudmap_developingLowerUrinaryTract_e14.5_ urogenital sinus_1000	DevelopingLowerUrinaryTract_e14.5_ urogenital sinus_emap-5517_top-relative-expression-ranked_1000	Gudmap Mouse MOE430.2	2.703e-15	1.06e-11	1.152e-13	1.019e-12	57	818	EYA4,BACH2,TENM2,TUBB3,FBN2,SLITRK6,PCDH10,CNTN1,COL8A1,COL9A1,SFRP1,SFSWAP,DPYSL4,CRMP1,ZKSCAN1,CYYR1,OSR1,PDE5A,PRKG1,MIAT,DKK3,MYLK,SPOCK1,INHBA,GATA2,GATA3,PARD6G,C11orf87,NCAM2,TUBB2B,BRINP1,GDF10,DCX,PTHLH,NEFL,SYT11,SULF1,STMN3,NTM,NRK,GRIN3A,NNAT,ST8SIA4,DPYSL3,TFAP2A,RGS4,EDNRA,MSRB3,TGFB2,TBX18,INA,ENTPD3,GREM1,CDH2,RBFOX2,EPHA3,ARMH4
Coexpression	M39302	CUI_DEVELOPING_HEART_C5_VALVAR_CELL	C8: Cell Type Signature	2.71e-15	2.526e-11	5.374e-13	5.223e-12	26	205	PENK,TUBB3,FHL1,LTBP4,HSPA2,RGS5,ID3,CCDC80,NSG1,RASL11B,LIMCH1,IFI6,DKK2,TCEAL7,TUBB2B,PTHLH,BGN,TUBA1A,TAGLN,DPYSL3,PLXDC1,RGS4,LMNA,EGR2,LTBP2,TPBG
Coexpression Atlas	PCBC_ctl_CardiacMyocyte_1000	Progenitor-Cell-Biology-Consortium_reference_CardiacMyocyte_top-relative-expression-ranked_1000	PCBC	2.795e-15	1.095e-11	1.178e-13	1.043e-12	63	975	VGLL3,RHOJ,TRPC4,ACTA2,ABCA9,EVA1A,ARHGAP29,ALDH1A3,FST,PLN,FOXC2,COL6A3,COL8A1,COL12A1,COL13A1,FN1,CCDC80,IFIT1,SMTN,RND3,POSTN,MOXD1,IGFBP7,OSR1,CCN2,IFI6,DCBLD2,DKK3,HTRA1,B4GALNT1,ARHGAP24,SPOCK1,INHBA,GBP1,P4HA3,NCAM2,SLFN5,PDE10A,BGN,CYRIA,OLFML1,SULF1,IFI44L,TAGLN,GPC1,GLIPR1,KRT7,NT5E,LPAR1,RGS4,TGFB2,TBX18,THBS2,HMCN1,FRMD6,EGR2,CCBE1,LTBP2,TNFAIP2,GREM1,UBASH3B,TOX2,EPHA3
Coexpression Atlas	Facebase_RNAseq_ratio_e9.5_MaxillaryArch_vs_Mandibular_500	FacebaseRNAseq_ratio_e9.5_MaxillaryArch_vs_Mandibular_top-relative-expression-ranked_500	FaceBase_RNAseq	3.019e-15	1.183e-11	1.259e-13	1.114e-12	43	488	IGSF8,PDE4D,PENK,TENM2,ADCY2,TUBB3,TUBB4A,KIAA1549L,SEMA5B,ALDH1A3,SLITRK6,MMP11,PCDH10,LTBP4,PCYT1B,COL6A3,COL8A1,CHODL,RGS5,TNC,SOSTDC1,APLP1,CCDC80,POSTN,IGFBP7,NSG1,OSR1,DKK3,DKK2,INHBA,P4HA3,NCAM2,COL24A1,NFIB,NTM,NRK,CCDC3,WNK2,SEMA3D,THBS2,TOX2,SENP7,EPHA3
Coexpression	M45687	HE_LIM_SUN_FETAL_LUNG_C0_VASCULAR_SMC_2_CELL	C8: Cell Type Signature	3.206e-15	2.988e-11	6.226e-13	6.05e-12	24	171	TTYH1,MCAM,ACTG2,SEMA5B,ARHGAP29,PLN,HSPA2,CAP2,COL8A1,SEPTIN5,RGS5,OLFML2B,ARHGDIB,MYH11,INHBA,FJX1,AIF1L,OLFML2A,ANOS1,CTXN1,PLXDC1,MSRB3,HMCN1,PHLDB2
Coexpression Atlas	gudmap_developingGonad_e18.5_epididymis_1000	DevelopingGonad_e18.5_epididymis_emap-13166_top-relative-expression-ranked_1000	Gudmap Mouse MOE430.2	3.794e-15	1.487e-11	1.565e-13	1.385e-12	56	799	TPM1,PENK,ACTA2,HMMR,MEIS2,ARHGAP31,SLITRK6,PCDH10,LTBP4,MEX3B,CNN1,COL8A1,SFRP1,COL12A1,STARD4,CHODL,SFSWAP,RGS5,MOXD1,ZNF43,SCMH1,PRKG1,MYH11,HTRA1,MYLK,INHBA,DOCK11,GAS1,RBM26,GATA2,AIF1L,GDF10,BGN,SULT1E1,RBMS3,NFIB,NRK,SGCE,TAGLN,DNMT3A,DPYSL3,CALD1,GSK3B,EDNRA,TGFB2,SEMA3D,THBS2,KATNBL1,LMNA,LTBP2,R3HDM1,LY6H,RBFOX2,SENP7,EPHA3,RASD2
GO: Biological Process	GO:0032990	cell part morphogenesis		3.795e-15	2.173e-11	2.58e-12	2.381e-11	64	997	EPHB2,EPHB6,MAP2,E2F7,TENM2,ADCY1,PICALM,TUBB3,SEMA5B,SLITRK6,MAP4K4,PLS3,CNTN1,FOXC1,FOXC2,TRIM46,SEMA3F,ISLR2,COL6A3,FN1,CHODL,TNC,WNT7A,DPYSL4,APLP1,CCDC80,SLITRK3,CRABP2,CRMP1,WDR47,POSTN,PRKG1,GAS1,GATA3,PARD6G,TUBB2B,DCX,NEFL,ANOS1,TUBA1A,NFIB,NECTIN1,SYT1,WASF1,NOVA1,NOVA2,SHANK1,DDR1,DPYSL3,STMN1,RGS4,GSK3B,EDNRA,TGFB2,PLEKHG4B,SEMA3D,INA,EGR2,PAK3,CDH2,PLEKHO1,RBFOX2,TPBG,EPHA3
Coexpression Atlas	gudmap_developingLowerUrinaryTract_P1_bladder_1000_B	DevelopingLowerUrinaryTract_P1_bladder_B_emap-30374_top-relative-expression-ranked_1000	Gudmap Mouse MOE430.2	3.833e-15	1.503e-11	1.565e-13	1.385e-12	55	774	TPM1,TPM2,VGLL3,RHOJ,ACTA2,MCAM,ACTG2,TENM2,MYL9,PROM2,UPK3A,FHL1,FKBP1A,LTBP4,CNN1,CNTN1,COL8A1,CHODL,RGS5,TNC,CDC42EP3,SMTN,POSTN,SCUBE2,OSR1,LYPD3,CCN2,MYADM,MYH11,MYLK,GAS1,RBM26,GBP1,C11orf87,PTHLH,NEFL,TSPAN17,NFIB,NRK,KCNMB1,TAGLN,GLIPR1,KRT7,NIPAL4,DPYSL3,CALD1,NT5E,DTNA,CAMK2G,PSCA,ADAMTS5,ACTR3B,MSRB3,THBS2,TNFAIP2
GO: Biological Process	GO:0032989	cellular component morphogenesis		4.055e-15	2.322e-11	2.58e-12	2.381e-11	70	1162	TPM1,EPHB2,EPHB6,MAP2,E2F7,TENM2,ADCY1,PICALM,TUBB3,MYL9,SEMA5B,SLITRK6,PLN,MAP4K4,PLS3,CNTN1,FOXC1,FOXC2,TRIM46,SEMA3F,ISLR2,COL6A3,FN1,CHODL,TNC,WNT7A,DPYSL4,APLP1,CCDC80,SLITRK3,CRABP2,CRMP1,WDR47,POSTN,PRKG1,MYH11,GAS1,GATA3,PARD6G,TUBB2B,DCX,NEFL,ANOS1,TUBA1A,NFIB,NECTIN1,SYT1,WASF1,NOVA1,NOVA2,SHANK1,GPC1,DDR1,DPYSL3,STMN1,RGS4,GSK3B,EDNRA,TGFB2,PLEKHG4B,SEMA3D,INA,EGR2,PAK3,CDH2,PLEKHO1,PH…
Coexpression Atlas	gudmap_kidney_adult_RenalCapsule_1000	kidney_adult_RenalCapsule_top-relative-expression-ranked_1000	Gudmap Mouse MOE430.2	4.765e-15	1.868e-11	1.926e-13	1.705e-12	55	778	VGLL3,RHOJ,ASIC2,PENK,ACTA2,CNTNAP3,ABCA9,FZD1,FHL1,FST,LTBP4,JCAD,COL6A3,COL8A1,SFRP1,COL12A1,MRAS,SGCD,CCDC80,SP110,IFIT1,CDC42EP3,POSTN,ARHGDIB,IGFBP7,OSR1,PRKG1,DKK2,HTRA1,MYLK,INHBA,DOCK11,GBP1,SLFN5,BGN,CYRIA,OLFML1,RBMS3,SULF1,NFIB,TAGLN,KRT7,DPYSL3,CALD1,ADAMTS5,LCP1,LPAR1,SEMA3D,HMCN1,TJP1,SERTAD4,LTBP2,LY6E,CDH12,ARMH4
Coexpression	M41672	TRAVAGLINI_LUNG_VASCULAR_SMOOTH_MUSCLE_CELL	C8: Cell Type Signature	4.981e-15	4.643e-11	9.402e-13	9.136e-12	16	61	TPM1,TPM2,ACTA2,MCAM,ACTG2,MYL9,HSPA2,CNN1,RGS5,ARHGDIB,IGFBP7,MYLK,BGN,TAGLN,CALD1,MSRB3
Coexpression	M45758	HE_LIM_SUN_FETAL_LUNG_C3_OMD_POS_ENDOTHELIAL_CELL	C8: Cell Type Signature	5.043e-15	4.701e-11	9.402e-13	9.136e-12	33	355	CNTNAP3,MCC,TRIM22,FBN2,LTBP4,FOXC1,FOXC2,SEMA3F,APLP1,CCDC80,CRABP2,CDC42EP3,RND3,CCN2,IFI6,DKK2,SPOCK1,GBP1,AIF1L,SULT1E1,ANOS1,NUAK1,RBMS3,SYT11,SULF1,NRK,KCNMB1,SGCE,IFI44L,TAGLN,TMEM231,HMCN1,LTBP2
Coexpression	M40209	DESCARTES_FETAL_INTESTINE_SMOOTH_MUSCLE_CELLS	C8: Cell Type Signature	5.397e-15	5.031e-11	9.865e-13	9.586e-12	15	51	ACTA2,ACTG2,MYL9,FST,CNN1,RGS5,OLFML2B,SLITRK3,MYH11,MYLK,NTM,KCNMB1,TAGLN,NIPAL4,SERTAD4
Coexpression	M39128	AIZARANI_LIVER_C29_MVECS_2	C8: Cell Type Signature	6.094e-15	5.681e-11	1.092e-12	1.062e-11	31	313	RAMP2,RHOJ,ARHGAP31,FKBP1A,LTBP4,FOXC1,COL8A1,ID3,CDC42EP3,CRIP2,AKAP12,POSTN,IGFBP7,CYYR1,ITPRIP,CCN2,LIMCH1,IFI6,DKK3,CNTNAP3B,MYADM,AIF1L,PTHLH,BGN,TUBA1A,RBMS3,NFIB,DPYSL3,SASH1,UACA,LMNA
Coexpression	M39122	AIZARANI_LIVER_C21_STELLATE_CELLS_1	C8: Cell Type Signature	6.436e-15	6e-11	1.132e-12	1.1e-11	25	194	ACTA2,MYL9,FHL1,LTBP4,COL4A1,COL6A3,SFRP1,CCDC80,CDC42EP3,RND3,IGFBP7,CCN2,DKK3,H19,MYADM,MYLK,BGN,RBMS3,CCDC3,KAZN,CALD1,RGS4,THBS2,LMNA,CCBE1
Coexpression Atlas	gudmap_RNAseq_e15.5_Podocytes_2500_K2	gudmap_RNAseq_e15.5_Podocytes_2500_K2	Gudmap RNAseq	6.865e-15	2.691e-11	2.746e-13	2.431e-12	35	333	RHOJ,CADM4,ACTA2,MCAM,MYL9,FOXC1,COL4A1,COL6A3,COL12A1,RGS5,TNC,WT1,CCDC80,CDC42EP3,CRIP2,POSTN,ARHGDIB,IGFBP7,SNCG,DKK2,MYH11,HTRA1,MYLK,GATA3,GBP1,SLFN5,PDE10A,GDF10,BGN,TSPAN17,KCNMB1,TAGLN,ADAMTS5,MSRB3,TNFAIP2
Coexpression	M13206	KINSEY_TARGETS_OF_EWSR1_FLII_FUSION_DN	C2:CGP: Chemical and Genetic Perturbations	7.902e-15	7.366e-11	1.364e-12	1.326e-11	32	338	MAP2,TENM2,FZD1,UBE2H,ARHGAP29,AMOTL2,FOXC1,FN1,RGS5,TNC,CCDC80,POSTN,LRRN3,DKK1,IGFBP7,ISG15,LIMCH1,IL17RD,SLFN5,SEPTIN6,NUAK1,RBMS3,KCNMB4,DLX2,TAGLN,NT5E,ADAMTS5,TGFB2,LMNA,HMCN1,FRMD6,EPHA3
Coexpression Atlas	Facebase_RNAseq_e9.5_Olfactory Placode_1000	FacebaseRNAseq_e9.5_Olfactory Placode_top-relative-expression-ranked_1000	FaceBase_RNAseq	9.038e-15	3.543e-11	3.56e-13	3.151e-12	62	973	IGSF8,EYA4,TENM2,ADCY2,MEIS2,TUBB3,KIAA1549L,PROM2,ALDH1A3,SLITRK6,MMP11,FHL1,LTBP4,RBM38,COL6A3,COL8A1,CHODL,RGS5,TNC,SOSTDC1,CCDC80,POSTN,IGFBP7,ZNF43,DLL3,OSR1,RAB15,CCN2,IL17RD,DKK2,HTRA1,MYLK,INHBA,GAS1,P4HA3,NCAM2,LAMP5,DCX,COL24A1,OLFML1,NFIB,NRK,CCDC3,DLX2,NNAT,PCBP4,SHANK1,CACNA1C,KRT7,DTNA,DUSP4,MAMLD1,GAL3ST4,TFAP2A,SEMA3D,THBS2,SOX21,CCBE1,TOX2,EPB41,SENP7,EPHA3
Coexpression Atlas	facebase_RNAseq_e14.5_palate_poster_distal_ERK2_WT_2500_K1	facebase_RNAseq_e14.5_palate_poster_distal_ERK2_WT_2500_K1	Gudmap RNAseq	9.083e-15	3.56e-11	3.56e-13	3.151e-12	69	1166	TPM2,EPHB6,EYA4,PDE4D,CTTNBP2,MAP2,PENK,RFTN2,KATNAL1,NREP,ADCY2,FZD1,FBN2,SEMA5B,SLITRK6,MMP11,FHL1,LTBP4,PDZD4,SFRP1,MRAS,FN1,WNT7A,SOSTDC1,OSR1,RASL11B,DKK3,ARHGAP24,INHBA,DOCK11,GAS2,P4HA3,BRINP1,PDE10A,DCX,OLFML2A,NEFL,ST6GAL2,OLFML1,RBMS3,SULF1,NFIB,STMN3,NTM,NRK,ARHGEF9,ZNF558,SGCE,MAFB,SHANK1,GLIPR1,EHBP1,CACNA1C,DPYSL3,CALD1,LPAR1,EDNRA,ZNF503,TGFB2,TBX18,SEMA3D,THBS2,LMNA,HMCN1,TLE4,SER…
GO: Biological Process	GO:0007409	axonogenesis		9.697e-15	5.553e-11	5.553e-12	5.125e-11	52	708	EPHB2,EPHB6,MAP2,E2F7,TENM2,ADCY1,PICALM,TUBB3,SEMA5B,SLITRK6,PLS3,CNTN1,FOXC1,FOXC2,TRIM46,SEMA3F,ISLR2,COL6A3,FN1,CHODL,TNC,WNT7A,APLP1,CCDC80,SLITRK3,CRABP2,CRMP1,WDR47,PRKG1,GAS1,GATA3,PARD6G,TUBB2B,DCX,NEFL,ANOS1,NFIB,NECTIN1,NOVA1,NOVA2,DPYSL3,STMN1,RGS4,GSK3B,EDNRA,TGFB2,PLEKHG4B,SEMA3D,EGR2,PAK3,CDH2,EPHA3
Coexpression Atlas	gudmap_developingLowerUrinaryTract_e14.5_ Genital tubercle_1000_k2	DevelopingLowerUrinaryTract_e14.5_ Genital tubercle_emap-6706_k-means-cluster#2_top-relative-expression-ranked_1000	Gudmap Mouse MOE430.2	1.001e-14	3.925e-11	3.886e-13	3.44e-12	37	377	MAP2,E2F7,RFTN2,CSRNP3,SLITRK6,PCDH10,COL8A1,COL13A1,WNT7A,SOSTDC1,CRABP2,RND3,DKK1,LIMCH1,DKK2,SPOCK1,PARD6G,FJX1,BRINP1,COL24A1,ST6GAL2,NUAK1,SULF1,NTM,ARHGEF9,DLX2,GRIN3A,ST8SIA4,DPYSL3,GAL3ST4,TFAP2A,EDNRA,SEMA3D,HMCN1,FRMD6,TLE4,SERTAD4
Coexpression Atlas	PCBC_ratio_BronchSmoothMuscl_vs_SC_cfr-2X-p05	Bronchial Smooth Muscle Cells_vs_Pluripotent Stem Cells-Confounder_removed-fold2.0_adjp0.05	PCBC_AltAnalyze	1.057e-14	4.144e-11	4.063e-13	3.596e-12	93	1893	EPHB2,TPM2,CDKN2A,VGLL3,ACTA2,FAM89B,PICALM,ABCA9,MEIS2,EHD3,FZD1,FBN2,MYL9,EVA1A,PKM,ARHGAP29,ALDH1A3,AMOTL2,FHL1,FST,MARCHF4,LTBP4,FOXC1,TOM1L2,JCAD,COL6A3,COL8A1,COL12A1,MRAS,COL13A1,FN1,SEPTIN5,TNC,OLFML2B,CCDC80,SP110,IFIT1,CDC42EP3,CRIP2,SMTN,WDR47,RND3,POSTN,MOXD1,DKK1,IGFBP7,ZKSCAN1,ISG15,GLIPR2,CCN2,IFI6,DCBLD2,ATP2B4,DKK3,SERPINB7,PRSS2,MYADM,HTRA1,ARHGAP24,ADAM19,MYLK,SPOCK1,GAS1,GBP1,…
Coexpression	M39069	MANNO_MIDBRAIN_NEUROTYPES_HDA2	C8: Cell Type Signature	1.242e-14	1.158e-10	2.105e-12	2.046e-11	39	513	PDE4D,MAP2,MCC,NREP,REEP2,SBK1,TUBB3,CSRNP3,SDC1,CNTN1,BEGAIN,TRIM46,APLP1,CRMP1,SHF,NSG1,MIAT,DKK3,B4GALNT1,TUBB2B,DCX,TUBA1A,NTM,NKAIN1,GPC2,NNAT,DPYSL3,DUSP4,STMN1,OPRK1,PIANP,INA,PAK3,LY6H,UBASH3B,PBX3,TOX2,RBFOX2,TPBG
Coexpression Atlas	PCBC_ratio_Lung Fibroblast_vs_SC_cfr-2X-p05	Lung Fibroblast_vs_Pluripotent Stem Cells-Confounder_removed-fold2.0_adjp0.05	PCBC_AltAnalyze	1.281e-14	5.02e-11	4.874e-13	4.314e-12	93	1899	CPA4,TPM2,CDKN2A,VGLL3,ACTA2,FAM89B,KATNAL1,PICALM,MEIS2,EHD3,FZD1,MYL9,ANLN,EVA1A,PKM,ARHGAP29,AMOTL2,FHL1,FST,MARCHF4,LTBP4,SDC1,TOM1L2,COL6A3,COL8A1,COL12A1,MRAS,COL13A1,FN1,TNC,OLFML2B,CCDC80,SP110,IFIT1,CDC42EP3,CRIP2,ARL4D,SMTN,WDR47,RND3,POSTN,ARHGDIB,MOXD1,DKK1,IGFBP7,OSR1,GLIPR2,CCN2,SNCG,IFI6,DCBLD2,ATP2B4,DKK3,SERPINB7,MYADM,HTRA1,ADAM19,SAMD9,MYLK,INHBA,GBP1,FJX1,SLFN5,BGN,OLFML2A,OLF…
Coexpression Atlas	gudmap_developingGonad_P2_epididymis_1000	DevelopingGonad_P2_epididymis_emap-30199_top-relative-expression-ranked_1000	Gudmap Mouse MOE430.2	1.311e-14	5.141e-11	4.943e-13	4.375e-12	55	797	TPM1,PENK,ACTA2,ACTG2,MEIS2,MYL9,FHL1,LTBP4,CNN1,SFRP1,COL12A1,STARD4,CHODL,SFSWAP,RGS5,TNC,POSTN,MOXD1,ZKSCAN1,ZNF43,PRKG1,MYH11,HTRA1,MYLK,INHBA,GAS1,GATA2,AIF1L,GDF10,BGN,SULT1E1,RBMS3,NFIB,NRK,TAGLN,DNMT3A,KRT7,DPYSL3,CALD1,NT5E,ADAMTS5,TFAP2A,GSK3B,EDNRA,TGFB2,THBS2,KATNBL1,LMNA,LTBP2,LY6E,R3HDM1,LY6H,SENP7,EPHA3,RASD2
Coexpression Atlas	gudmap_dev gonad_e11.5_M_GonMes_Sma_1000	dev gonad_e11.5_M_GonMes_Sma_top-relative-expression-ranked_1000	Gudmap Mouse ST 1.0	1.345e-14	5.274e-11	5.023e-13	4.446e-12	57	849	TPM1,MAP2,MCC,ADCY2,TUBB4A,MYL9,CNN1,CAP2,JCAD,SFRP1,MRAS,FN1,RGS5,TNC,PODXL,WT1,CCDC80,STIL,CRABP2,CDC42EP3,RND3,POSTN,NKD1,NSG1,OSR1,GLIPR2,UHRF1,RASL11B,CCN2,PRKG1,DCBLD2,PARD6G,TUBB2B,FJX1,DENND2B,NUAK1,OLFML1,SULF1,NRK,ZNF558,MAFB,TAGLN,WASF1,KRT7,CALD1,DUSP4,ADAMTS5,LPAR1,SDAD1,EDNRA,SEMA3D,LMNA,HMCN1,EGR2,PAK3,CDH2,CDH12
Coexpression Atlas	GSM777050_500	Stromal Cells, FRC.MLN, gp38+ CD31- CD140a+, Lymph Node, avg-5	Immgen.org, GSE15907	1.453e-14	5.695e-11	5.372e-13	4.755e-12	41	466	RAMP2,PENK,ACTA2,HLX,ABCA9,FZD1,MYL9,ARHGAP29,AMOTL2,LTBP4,PLS3,COL4A1,COL6A3,SFRP1,FN1,TNC,OLFML2B,ID3,CCDC80,CRIP2,POSTN,IGFBP7,OSR1,HTRA1,ARHGAP24,GAS1,GDF10,DENND2B,BGN,OLFML1,RBMS3,SULF1,NFIB,SGCE,TAGLN,DPYSL3,ADAMTS5,LPAR1,THBS2,HMCN1,GREM1
Coexpression Atlas	GSM777043_500	Stromal Cells, Fi.MTS15+.Th, CD45- PDGFRa+ MTS15+, Thymus, avg-3	Immgen.org, GSE15907	1.523e-14	5.971e-11	5.58e-13	4.939e-12	40	445	RAMP2,RHOJ,ABCA9,ARHGAP29,FHL1,LTBP4,PLS3,COL4A1,COL6A3,FN1,RGS5,TNC,ID3,CCDC80,CRIP2,AKAP12,RND3,POSTN,IGFBP7,DCBLD2,HTRA1,GAS1,DENND2B,BGN,OLFML1,RBMS3,SULF1,NFIB,SGCE,MAFB,DPYSL3,SASH1,CALD1,ADAMTS5,EDNRA,THBS2,LMNA,TJP1,TNFAIP2,EPHA3
Coexpression Atlas	facebase_RNAseq_e14.5_palate_poster_proximal_ERK2_WT_2500_K2	facebase_RNAseq_e14.5_palate_poster_proximal_ERK2_WT_2500_K2	Gudmap RNAseq	1.599e-14	6.266e-11	5.802e-13	5.135e-12	70	1208	IGSF8,TPM2,EPHB6,TTYH1,EYA4,PDE4D,CTTNBP2,MAP2,MCC,PLPPR3,RFTN2,NREP,PICALM,MEIS2,FZD1,FBN2,KIAA1549L,SEMA5B,ARHGAP31,CPT1C,SLITRK6,MMP11,LMF1,SFRP1,MRAS,FN1,WNT7A,ZFP14,APLP1,NKD1,DKK3,H19,ARHGAP24,INHBA,P4HA3,TUBB2B,BRINP1,NEFL,ST6GAL2,FBXL7,OLFML1,TUBA1A,RBMS3,SULF1,NFIB,STMN3,NRK,ARHGEF9,EXOC6B,MAFB,KCNMB4,ST8SIA4,SHANK1,EHBP1,CACNA1C,CALD1,LCP1,TAMALIN,ZNF503,SEMA3D,THBS2,PIANP,LMNA,HMCN1,TL…
Coexpression Atlas	BM Top 100 - myometrium	BM Top 100 - myometrium	Body Map	1.978e-14	7.753e-11	7.113e-13	6.296e-12	17	65	TPM2,ACTA2,ACTG2,MYL9,PLN,CNN1,COL6A3,WT1,CCDC80,CDC42EP3,H19,MYH11,GAS1,TAGLN,ADAMTS5,EDNRA,FRMD6
Coexpression Atlas	Facebase_RNAseq_e8.5_Non-Floor Plate Neural Epithelium_2500_K5	FacebaseRNAseq_e8.5_Non-Floor Plate Neural Epithelium_top-relative-expression-ranked_2500_k-means-cluster#5	FaceBase_RNAseq	2.34e-14	9.173e-11	8.339e-13	7.381e-12	52	732	EPHB2,TTYH1,MAP2,MEIS2,TUBB3,KIAA1549L,UBE2H,CSRNP3,SEMA5B,CPT1C,FHL1,PCDH10,LTBP4,MGAT5B,IGLON5,COL8A1,STARD4,POGK,WNT7A,DPYSL4,POU3F1,APLP1,CRMP1,ZNF43,SCMH1,NSG1,NCAM2,TUBB2B,BRINP1,DCX,ST6GAL2,CYRIA,TUBA1A,SYT11,ASTN2,SGCE,WNK2,NOVA1,DNMT3A,SHANK1,DDR1,DTNA,MAMLD1,TAMALIN,SOX21,GPR137C,TLE4,PAK3,TOX2,CDH2,SENP7,EPHA3
Coexpression Atlas	PCBC_ratio_ECTO_vs_MESO-5_cfr-2X-p05	Ectoderm Differentiated Cells_vs_Mesoderm Day 5-Confounder_removed-fold2.0_adjp0.05	PCBC_AltAnalyze	2.395e-14	9.388e-11	8.458e-13	7.486e-12	61	967	TTYH1,MAP2,CADM4,ACTA2,CNTNAP3,E2F7,RCBTB2,REEP2,MEIS2,FZD1,UBE2H,CPT1C,PGAP1,FHL1,UBE2E3,MEX3B,MRTFA,COL9A1,STARD4,SESN3,DPYSL4,APLP1,CCDC80,CRABP2,PREPL,AKAP12,CRMP1,RND3,SCUBE2,IGFBP7,CCN2,IFI6,MIAT,FAM131B,H19,TCEAL7,DOCK11,GAS1,SYT11,SULF1,NECTIN1,ARHGEF9,SYT1,MAFB,EHBP1,ZFP90,PCDHGB6,PCDHB10,ZNF503,PLEKHG4B,SLC7A8,NARF,PIANP,SOX21,INA,FRMD6,CCBE1,TLE4,LTBP2,PBX3,TPBG
Coexpression Atlas	gudmap_dev lower uro neuro_e15.5_BladdPelvicGanglion_Sox10_200	dev lower uro neuro_e15.5_BladdPelvicGanglion_Sox10_top-relative-expression-ranked_200	Gudmap Mouse ST 1.0	2.662e-14	1.043e-10	9.315e-13	8.245e-12	25	170	PENK,CSMD3,TUBB3,TUBB4A,SLITRK6,PCDH10,CNN1,CRMP1,POSTN,NSG1,SNCG,SNRPN,GATA3,NCAM2,DCX,NEFL,SYT11,STMN3,NRK,SYT1,NNAT,NOVA1,DPYSL3,RGS4,INA
Coexpression	M45714	HE_LIM_SUN_FETAL_LUNG_C1_SMG_BASAL_CELL	C8: Cell Type Signature	3.559e-14	3.317e-10	5.924e-12	5.756e-11	33	380	TPM2,MAP2,ACTA2,MCAM,MCC,ACTG2,RCBTB2,TRIM29,REEP2,KIAA1549L,PGAP1,FST,FOXC1,COL4A1,COL9A1,SFRP1,SOSTDC1,MOXD1,DLL3,OSR1,IL17RD,DKK3,HTRA1,LAMP5,SULF1,STMN3,CCDC3,KCNMB4,UACA,TFAP2A,SERTAD4,PAK3,TNFAIP2
Coexpression	M39114	AIZARANI_LIVER_C10_MVECS_1	C8: Cell Type Signature	3.703e-14	3.452e-10	6.056e-12	5.884e-11	28	269	RAMP2,RHOJ,MCC,MEIS2,ARHGAP31,ARHGAP29,FKBP1A,FOXC1,COL4A1,ID3,CDC42EP3,CRIP2,IGFBP7,CYYR1,ITPRIP,CCN2,LIMCH1,CNTNAP3B,MYADM,AIF1L,NUAK1,TUBA1A,RBMS3,NFIB,DPYSL3,SASH1,UACA,LMNA
Coexpression Atlas	Facebase_RNAseq_e10.5_Neural Epithelium Overlying Medial Eminence_500	FacebaseRNAseq_e10.5_Neural Epithelium Overlying Medial Eminence_top-relative-expression-ranked_500	FaceBase_RNAseq	4.527e-14	1.775e-10	1.561e-12	1.382e-11	41	482	TTYH1,MAP2,TENM2,REEP2,TUBB3,TUBB4A,SEMA5B,PCDH10,MGAT5B,RBM38,WNT7A,DPYSL4,POU3F1,CRMP1,RND3,DLL3,SNRPN,MYCL,CCP110,TUBB2B,MEIS3,DCX,SYT11,STMN3,DLX2,NNAT,PCBP4,WNK2,NOVA1,GPC1,DDR1,DPYSL3,DTNA,MAMLD1,CBFA2T3,SOX21,INA,GPR137C,PAK3,TOX2,CDH2
Coexpression Atlas	facebase_RNAseq_e14.5_palate_poster_oral_Tgfbr2_WT_2500_K4	facebase_RNAseq_e14.5_palate_poster_oral_Tgfbr2_WT_2500_K4	Gudmap RNAseq	4.54e-14	1.78e-10	1.561e-12	1.382e-11	67	1148	EYA4,CTTNBP2,MAP2,PENK,MCC,MRPS35,RFTN2,NREP,FZD1,FBN2,CPT1C,SLITRK6,MMP11,LTBP4,PDZD4,PCYT1B,TRIM46,LRP12,SFRP1,FN1,WNT7A,SOSTDC1,ZFP14,MOXD1,NSG1,OSR1,RASL11B,ATP2B4,DKK3,ARHGAP24,INHBA,GAS1,GAS2,P4HA3,BRINP1,DCX,OLFML2A,ST6GAL2,CYRIA,FBXL7,OLFML1,RBMS3,SULF1,NFIB,NRK,ARHGEF9,TMEM231,ST8SIA4,SHANK1,EHBP1,CACNA1C,CALD1,STMN1,LPAR1,EDNRA,ZNF503,TGFB2,SEMA3D,THBS2,LMNA,HMCN1,FRMD6,SERTAD4,PAK3,PWW…
Coexpression Atlas	gudmap_developingGonad_e11.5_ovary + mesonephros_500	DevelopingGonad_e11.5_ovary + mesonephros_emap-3226_top-relative-expression-ranked_500	Gudmap Mouse MOE430.2	4.637e-14	1.818e-10	1.581e-12	1.399e-11	38	417	TPM1,MEIS2,TUBB3,CSRNP3,MEX3B,COL9A1,STARD4,SFSWAP,RGS5,CRABP2,CRMP1,SCMH1,GIGYF2,PRKG1,SNCG,MIAT,RBM26,AIF1L,PDE10A,NEFL,ST6GAL2,NFIB,STMN3,NRK,DNMT3A,DPYSL3,CALD1,RGS4,GSK3B,EDNRA,LSM12,TBX18,KATNBL1,PSME3,R3HDM1,CDH2,RBFOX2,SENP7
Coexpression Atlas	Facebase_RNAseq_e9.5_Maxillary Arch_500	FacebaseRNAseq_e9.5_Maxillary Arch_top-relative-expression-ranked_500	FaceBase_RNAseq	4.852e-14	1.902e-10	1.64e-12	1.451e-11	41	483	HSPBP1,ADCY2,MEIS2,PKM,ALDH1A3,SLITRK6,MMP11,LTBP4,RBM38,FOXC1,COL6A3,COL8A1,COL9A1,CHODL,RGS5,TNC,SOSTDC1,DPYSL4,CCDC80,POSTN,MOXD1,OSR1,LIMCH1,IL17RD,DKK2,INHBA,GATA3,P4HA3,NCAM2,LAMP5,COL24A1,NFIB,NRK,CCDC3,DLX2,NNAT,PCBP4,SEMA3D,THBS2,SENP7,EPHA3
Coexpression Atlas	gudmap_developingLowerUrinaryTract_P1_ureter_1000	DevelopingLowerUrinaryTract_P1_ureter_emap-30363_top-relative-expression-ranked_1000	Gudmap Mouse MOE430.2	5.673e-14	2.224e-10	1.901e-12	1.682e-11	53	774	TPM2,TTYH1,VGLL3,EYA4,PENK,ACTA2,ACTG2,ABCA9,MYL9,PROM2,UPK3A,ALDH1A3,FST,CNN1,CAP2,KLF11,COL9A1,COL12A1,RGS5,CDC42EP3,AKAP12,POSTN,SCUBE2,CYYR1,LYPD3,PDE5A,CCN2,DKK3,DKK2,MYCL,MYH11,MYLK,GBP1,GDF10,CYRIA,CCDC3,ARHGEF9,TAGLN,KRT7,NIPAL4,NT5E,PSCA,ADAMTS5,RGS4,MSRB3,TBX18,SEMA3D,THBS2,CCBE1,ENTPD3,LTBP2,TNFAIP2,RASD2
Coexpression Atlas	gudmap_developingLowerUrinaryTract_P2_bladder detrusor (LCM)_1000_k1	DevelopingLowerUrinaryTract_P2_bladder detrusor (LCM)_emap-30376_k-means-cluster#1_top-relative-expression-ranked_1000	Gudmap Mouse MOE430.2	5.838e-14	2.288e-10	1.939e-12	1.717e-11	29	243	TPM1,TPM2,RHOJ,MCAM,ACTG2,MYL9,EVA1A,FHL1,CNN1,COL6A3,CHODL,CDC42EP3,SMTN,POSTN,SCUBE2,MYH11,MYLK,BGN,TSPAN17,KCNMB1,TAGLN,GLIPR1,NIPAL4,CALD1,NT5E,CAMK2G,THBS2,LMNA,RASD2
Coexpression	M17079	VECCHI_GASTRIC_CANCER_ADVANCED_VS_EARLY_UP	C2:CGP: Chemical and Genetic Perturbations	6.597e-14	6.149e-10	1.06e-11	1.03e-10	23	177	NREP,MMP11,COL4A1,COL8A1,COL12A1,FN1,MOXD1,GIGYF2,SPOCK1,INHBA,GAS1,BGN,ANOS1,NUAK1,SULF1,NTM,MAFB,CALD1,EDNRA,THBS2,FRMD6,ZNF532,LTBP2
Coexpression Atlas	PCBC_ratio_ECTO_vs_DE_cfr-2X-p05	Ectoderm Differentiated Cells_vs_Endoderm Differentiated Cells-Confounder_removed-fold2.0_adjp0.05	PCBC_AltAnalyze	7.375e-14	2.891e-10	2.429e-12	2.15e-11	64	1075	EPHB2,TTYH1,MAP2,CADM4,ACTA2,CNTNAP3,RCBTB2,REEP2,MEIS2,FZD1,CPT1C,FHL1,MEX3B,MRTFA,LRP12,COL9A1,BIN1,SESN3,ID3,APLP1,CCDC80,CRABP2,PREPL,SH2B1,SCUBE2,IGFBP7,ZKSCAN1,SCMH1,TTC17,IFI6,MIAT,FAM131B,H19,TCEAL7,SPOCK1,DOCK11,GAS1,FJX1,SYT11,SULF1,NECTIN1,ARHGEF9,SYT1,SGCE,MAFB,DDHD2,TMEM231,ZFP90,PCDHGB6,DTX3,PCDHB10,ZNF503,PLEKHG4B,SLC7A8,PIANP,SOX21,FRMD6,CCBE1,TLE4,LTBP2,PBX3,HSD17B14,SENP7,TPBG
Coexpression Atlas	DevelopingLowerUrinaryTract_e14.5_ urethra_emap-30902_k4_1000	DevelopingLowerUrinaryTract_e14.5_ urethra_emap-30902_k-means-cluster#4_top-relative-expression-ranked_1000	Gudmap Mouse MOE430.2	7.519e-14	2.947e-10	2.456e-12	2.174e-11	23	147	EYA4,CTTNBP2,CSRNP3,SLITRK6,FST,PCDH10,MEX3B,COL8A1,TNC,GIGYF2,DKK2,GAS2,ST6GAL2,SULF1,ARHGEF9,DPYSL3,TFAP2A,LPAR1,EDNRA,SEMA3D,HMCN1,TLE4,EPHA3
Coexpression Atlas	gudmap_kidney_adult_JuxtaGlom_Ren1_Captopr_k4_1000	kidney_adult_JuxtaGlom_Ren1_Captopr_k-means-cluster#4_top-relative-expression-ranked_1000	Gudmap Mouse MOE430.2	8.942e-14	3.505e-10	2.897e-12	2.564e-11	25	179	TPM2,ACTA2,MCAM,PICALM,MYL9,FHL1,PLN,SDC1,CNN1,CAP2,RGS5,IGFBP7,PRKG1,SNCG,DKK2,MYH11,INHBA,GATA3,BGN,CCDC3,KCNMB1,TAGLN,CACNA1C,CALD1,EDNRA
Coexpression Atlas	DevelopingLowerUrinaryTract_e14.5_ urogenital sinus_emap-6689_k3_1000	DevelopingLowerUrinaryTract_e14.5_ urogenital sinus_emap-6689_k-means-cluster#3_top-relative-expression-ranked_1000	Gudmap Mouse MOE430.2	9.812e-14	3.846e-10	3.153e-12	2.791e-11	26	196	EYA4,TENM2,CSRNP3,SLITRK6,PCDH10,UBE2E3,COL8A1,TNC,MOXD1,DKK1,DKK2,INHBA,GAS2,ST6GAL2,SULF1,ST8SIA4,DPYSL3,GAL3ST4,TFAP2A,LPAR1,EDNRA,SERTAD4,PAK3,CDH2,SMAD1,EPHA3
Coexpression Atlas	gudmap_dev gonad_e13.5_M_InterstitFLeydig_MafB_k4_500	dev gonad_e13.5_M_InterstitFLeydig_MafB_k-means-cluster#4_top-relative-expression-ranked_500	Gudmap Mouse ST 1.0	1.317e-13	5.163e-10	4.198e-12	3.716e-11	25	182	VGLL3,ACTA2,ADCY2,LTBP4,COL6A3,SFRP1,FN1,SOSTDC1,RND3,POSTN,LRRN3,PDE5A,ATP2B4,ARHGAP24,INHBA,BGN,NUAK1,OLFML1,NRK,CALD1,ADAMTS5,EDNRA,TGFB2,EPHA3,ARMH4
Coexpression Atlas	gudmap_developingLowerUrinaryTract_P1_bladder_J_1000_k2	DevelopingLowerUrinaryTract_P1_bladder_J_emap-30374_k-means-cluster#2_top-relative-expression-ranked_1000	Gudmap Mouse MOE430.2	1.354e-13	5.306e-10	4.279e-12	3.788e-11	29	251	TPM1,TPM2,PDE4D,RHOJ,ACTA2,ACTG2,TENM2,MYL9,FHL1,HSPA2,CNN1,COL12A1,RGS5,CDC42EP3,SMTN,POSTN,CCN2,MYADM,MYH11,MYLK,PTHLH,TAGLN,GLIPR1,CALD1,NT5E,DTNA,MSRB3,THBS2,RASD2
Coexpression Atlas	gudmap_kidney_adult_Mesangium_Meis_200	kidney_adult_Mesangium_Meis_top-relative-expression-ranked_200	Gudmap Mouse MOE430.2	1.485e-13	5.82e-10	4.656e-12	4.121e-11	24	167	TRPC4,ABCA9,EHD3,PLN,RGS5,CCDC80,CDC42EP3,POSTN,ARHGDIB,IGFBP7,PDE5A,CCN2,PRKG1,DKK2,HTRA1,GATA3,GBP1,SLFN5,BGN,CALD1,UACA,NT5E,ADAMTS5,SLC7A8
Coexpression Atlas	gudmap_dev gonad_e13.5_F_VascAssocMesenchStromOvary_Sma_500	dev gonad_e13.5_F_VascAssocMesenchStromOvary_Sma_top-relative-expression-ranked_500	Gudmap Mouse ST 1.0	1.897e-13	7.436e-10	5.901e-12	5.223e-11	35	372	MAP2,ACTA2,FBN2,MYL9,ARHGAP29,MMP11,FST,LTBP4,COL6A3,SFRP1,COL12A1,PODXL,WT1,CRABP2,POSTN,NKD1,NSG1,MYH11,INHBA,DENND2B,BGN,OLFML1,SULF1,NRK,ZNF558,MAFB,KRT7,CALD1,PLXDC1,LPAR1,EDNRA,TGFB2,HMCN1,EGR2,PBX3
Coexpression Atlas	gudmap_dev gonad_e12.5_M_InterstitTestis_Sma_500	dev gonad_e12.5_M_InterstitTestis_Sma_top-relative-expression-ranked_500	Gudmap Mouse ST 1.0	2.053e-13	8.048e-10	6.337e-12	5.609e-11	35	373	TPM1,MAP2,ACTA2,LTBP4,COL6A3,SFRP1,FN1,OLFML2B,SOSTDC1,CRABP2,RND3,LRRN3,IGFBP7,GLIPR2,UHRF1,PDE5A,ATP2B4,INHBA,DENND2B,BGN,OLFML1,SULF1,NRK,KRT7,CALD1,PLXDC1,ADAMTS5,LPAR1,EDNRA,TGFB2,SEMA3D,HMCN1,EGR2,PAK3,ARMH4
Coexpression	M2572	ANASTASSIOU_MULTICANCER_INVASIVENESS_SIGNATURE	C2:CGP: Chemical and Genetic Perturbations	2.198e-13	2.049e-09	3.474e-11	3.375e-10	15	64	ACTA2,MMP11,COL6A3,FN1,OLFML2B,POSTN,SPOCK1,INHBA,BGN,NUAK1,SULF1,NTM,EDNRA,THBS2,GREM1
Coexpression	M14507	CHARAFE_BREAST_CANCER_LUMINAL_VS_BASAL_DN	C2:CGP: Chemical and Genetic Perturbations	2.27e-13	2.116e-09	3.526e-11	3.426e-10	35	456	TRIM29,TRIM22,EVA1A,ALDH1A3,FHL1,FST,MAP4K4,FKBP1A,UBE2E3,PLS3,COL4A1,COL8A1,BIN1,SFRP1,CCDC80,CDC42EP3,RND3,IGFBP7,DCBLD2,HTRA1,SAMD9,INHBA,GAS1,GBP1,RBMS3,GLIPR1,EHBP1,CALD1,NT5E,FRMD6,TLE4,UBASH3B,TOX2,PHLDB2,RBFOX2
Coexpression Atlas	gudmap_dev lower uro neuro_e14.5_BladdPelvicGanglion_Sox10_500	dev lower uro neuro_e14.5_BladdPelvicGanglion_Sox10_top-relative-expression-ranked_500	Gudmap Mouse ST 1.0	2.691e-13	1.055e-09	8.241e-12	7.294e-11	38	441	VGLL3,EYA4,MAP2,PENK,CSMD3,FABP5,TUBB3,TUBB4A,HOXD11,SLITRK6,PCDH10,CNN1,APLP1,CRMP1,POSTN,MOXD1,NSG1,SNCG,SNRPN,GATA3,NCAM2,TUBB2B,DCX,SEPTIN6,NEFL,CYRIA,SYT11,STMN3,NRK,SYT1,ASTN2,KCNMB4,NNAT,NOVA1,CTXN1,DPYSL3,RGS4,INA
Coexpression	M1351	SCHAEFFER_PROSTATE_DEVELOPMENT_48HR_DN	C2:CGP: Chemical and Genetic Perturbations	3.024e-13	2.819e-09	4.622e-11	4.491e-10	33	410	CTTNBP2,RHOJ,BACH2,SEMA5B,PCDH10,MEX3B,CNTN1,COL8A1,CCDC74B,WNT7A,CCDC80,CDC42EP3,RND3,IL17RD,INHBA,GAS1,PTHLH,CYRIA,FBXL7,NUAK1,RBMS3,SULF1,KAZN,GRIN3A,WASF1,ZNF704,ZEB1,PLXDC1,ADAMTS8,EDNRA,LMNA,GREM1,UBASH3B
Coexpression Atlas	gudmap_developingLowerUrinaryTract_e14.5_ bladder_1000	DevelopingLowerUrinaryTract_e14.5_ bladder_emap-30872_top-relative-expression-ranked_1000	Gudmap Mouse MOE430.2	3.613e-13	1.416e-09	1.098e-11	9.718e-11	53	811	TPM2,TRAF5,PDE4D,RHOJ,ACTA2,ACTG2,MEIS2,FZD1,MYL9,TBC1D14,UPK3A,SLITRK6,CNN1,CAP2,COL8A1,SFRP1,STARD4,CLDND1,CCDC80,PREPL,RND3,CELF1,OSR1,GIGYF2,PDE5A,PRKG1,DCBLD2,DKK3,MYH11,MYLK,GBP1,C11orf87,CYRIA,SULF1,NFIB,NRK,KCNMB1,TAGLN,ST8SIA4,DNMT3A,NIPAL4,CALD1,ACTR3B,RGS4,GSK3B,MSRB3,TGFB2,TBX18,SEMA3D,THBS2,CDH2,RBFOX2,ARMH4
Coexpression Atlas	gudmap_developingLowerUrinaryTract_adult_bladder_1000	DevelopingLowerUrinaryTract_adult_bladder_emap-29457_top-relative-expression-ranked_1000	Gudmap Mouse MOE430.2	3.791e-13	1.486e-09	1.143e-11	1.012e-10	50	734	TPM1,TPM2,VGLL3,PDE4D,ACTA2,ACTG2,TENM2,ABCA9,MYL9,PROM2,UPK3A,SLITRK6,FHL1,PLN,CNN1,CAP2,COL8A1,COL12A1,RGS5,CDC42EP3,SMTN,SCUBE2,TAF9B,LYPD3,PDE5A,DKK3,MYH11,HTRA1,MYLK,GATA3,GBP1,PTHLH,SULT1E1,CYRIA,CCDC3,KCNMB1,TAGLN,GLIPR1,KRT7,NIPAL4,CALD1,NT5E,DTNA,RGS4,TTLL7,MSRB3,THBS2,EGR2,ENTPD3,TNFAIP2
Coexpression	M39066	MANNO_MIDBRAIN_NEUROTYPES_HNBML5	C8: Cell Type Signature	4.006e-13	3.734e-09	6.023e-11	5.853e-10	35	465	MAP2,NREP,TENM2,REEP2,SBK1,TUBB3,CSRNP3,APLP1,CRMP1,NSG1,MIAT,GATA2,GATA3,TUBB2B,DCX,NUAK1,GPC2,NNAT,NOVA1,NOVA2,DPYSL3,DUSP4,NCS1,PIANP,MSANTD3-TMEFF1,INA,GPR137C,VASH2,SERTAD4,PAK3,PBX3,TOX2,EPB41,RBFOX2,EPHA3
Coexpression Atlas	gudmap_developingGonad_e11.5_testes and mesonephros_k5_500	DevelopingGonad_e11.5_testes and mesonephros_emap-3226_k-means-cluster#5_top-relative-expression-ranked_500	Gudmap Mouse MOE430.2	4.014e-13	1.573e-09	1.201e-11	1.063e-10	14	46	BACH2,TUBB3,DPYSL4,APLP1,CRABP2,CRMP1,DLL3,SNRPN,TUBB2B,NEFL,SYT11,PCBP4,DPYSL3,EPHA3
Coexpression Atlas	JC_fibro_2500_K5	JC_fibro_top-relative-expression-ranked_2500_k-means-cluster#5	PCBC	4.176e-13	1.637e-09	1.231e-11	1.09e-10	53	814	CPA4,TPM2,VGLL3,PENK,NREP,EHD3,HOXD11,EVA1A,AMOTL2,MARCHF4,PCDH10,HSPA2,COL6A3,COL8A1,COL12A1,FN1,CCDC80,CDC42EP3,RND3,MOXD1,DKK1,IGFBP7,OSR1,PDE5A,IFI6,DKK3,SERPINB7,MYLK,SPOCK1,INHBA,GAS1,SYNC,BGN,NUAK1,OLFML1,SYT11,SULF1,TAGLN,CALD1,UACA,MAMLD1,ADAMTS5,LPAR1,MSRB3,SEMA3D,THBS2,C1orf198,FRMD6,EGR2,CCBE1,TLE4,GREM1,TOX2
Coexpression Atlas	gudmap_developingLowerUrinaryTract_e13.5_bladder mesenchyme_1000_k3	DevelopingLowerUrinaryTract_e13.5_bladder mesenchyme_emap-3087_k-means-cluster#3_top-relative-expression-ranked_1000	Gudmap Mouse MOE430.2	4.176e-13	1.637e-09	1.231e-11	1.09e-10	23	159	TPM1,TRAF5,VGLL3,ACTA2,ACTG2,FZD1,MYL9,CNN1,CAP2,COL12A1,OLFML2B,OSR1,PDE5A,DKK3,MYH11,MYLK,CYRIA,KCNMB1,TAGLN,GLIPR1,ACTR3B,MSRB3,THBS2
Coexpression	MM1002	SCHAEFFER_PROSTATE_DEVELOPMENT_48HR_DN	M2:CGP: Chemical and Genetic Perturbations	4.237e-13	3.95e-09	6.269e-11	6.092e-10	33	415	CTTNBP2,RHOJ,BACH2,SEMA5B,PCDH10,MEX3B,CNTN1,COL8A1,CCDC74B,WNT7A,CCDC80,CDC42EP3,RND3,IL17RD,INHBA,GAS1,PTHLH,CYRIA,FBXL7,NUAK1,RBMS3,SULF1,KAZN,GRIN3A,WASF1,ZNF704,ZEB1,PLXDC1,ADAMTS8,EDNRA,LMNA,GREM1,UBASH3B
Coexpression Atlas	gudmap_RNAseq_p2_CD2APMEISWT_2500	gudmap_RNAseq_p2_CD2APMEISWT_2500	Gudmap RNAseq	4.346e-13	1.704e-09	1.271e-11	1.125e-10	87	1820	TPM2,RHOJ,CADM4,TRPC4,ACTA2,DACT2,MCAM,MCC,HLX,RFTN2,PICALM,ABCA9,EHD3,MYL9,UBE2H,PROM2,ARHGAP31,FHL1,PLN,PLS3,IGLON5,FOXC1,TOM1L2,COL4A1,JCAD,COL6A3,COL8A1,COL12A1,RGS5,TNC,OLFML2B,WT1,CCDC80,SP110,CDC42EP3,CRIP2,AKAP12,SMTN,ARHGDIB,TAF9B,IGFBP7,ISG15,GLIPR2,ITPRIP,RASL11B,PDE5A,CCN2,PRKG1,SNCG,IL17RD,DCBLD2,DKK2,MYADM,MYH11,HTRA1,MYLK,GATA3,GBP1,PARD6G,SLFN5,PDE10A,GDF10,DENND2B,BGN,CYRIA,TSPAN…
Coexpression Atlas	gudmap_developingLowerUrinaryTract_P1_bladder_B_1000_k1	DevelopingLowerUrinaryTract_P1_bladder_B_emap-30374_k-means-cluster#1_top-relative-expression-ranked_1000	Gudmap Mouse MOE430.2	4.534e-13	1.777e-09	1.316e-11	1.165e-10	25	192	TPM1,TPM2,ACTA2,MCAM,ACTG2,TENM2,MYL9,FHL1,CNN1,CHODL,CDC42EP3,POSTN,CCN2,MYH11,MYLK,GBP1,PTHLH,TSPAN17,KCNMB1,TAGLN,NT5E,DTNA,ACTR3B,MSRB3,THBS2
Coexpression Atlas	gudmap_developingGonad_e16.5_epididymis_1000	DevelopingGonad_e16.5_epididymis_emap-29702_top-relative-expression-ranked_1000	Gudmap Mouse MOE430.2	4.667e-13	1.83e-09	1.345e-11	1.191e-10	52	790	TPM1,PENK,ACTA2,HMMR,MEIS2,CNOT6,FBN2,ARHGAP31,ALDH1A3,PCDH10,LTBP4,MEX3B,COL8A1,COL9A2,SFRP1,COL13A1,STARD4,CHODL,SFSWAP,APLP1,MOXD1,ZNF43,SCMH1,GIGYF2,PRKG1,MYLK,INHBA,DOCK11,GAS1,RBM26,GATA2,AIF1L,PDE10A,GDF10,BGN,RBMS3,NFIB,NRK,SGCE,TAGLN,DNMT3A,DPYSL3,CALD1,GSK3B,EDNRA,TGFB2,SEMA3D,KATNBL1,R3HDM1,LY6H,RBFOX2,EPHA3
Coexpression Atlas	ratio_EB_vs_SC_500_K5	ratio_EmbryoidBody_vs_StemCell_top-relative-expression-ranked_500_k-means-cluster#5	PCBC	4.947e-13	1.939e-09	1.415e-11	1.253e-10	20	116	CPA4,FOXC1,COL6A3,COL12A1,FN1,CCDC80,DKK1,OSR1,INHBA,GBP1,GDF10,BGN,OLFML1,RBMS3,SULF1,GLIPR1,ZEB1,RGS4,TGFB2,GREM1
Coexpression	M45673	HE_LIM_SUN_FETAL_LUNG_C0_MYL4_POS_SMC_CELL	C8: Cell Type Signature	5.015e-13	4.675e-09	7.305e-11	7.098e-10	19	124	TRAF5,ACTG2,FST,CNN1,CAP2,RBM38,COL12A1,CDC42EP3,NKD1,RASL11B,MYH11,HTRA1,ADAM19,TUBB2B,ANOS1,KCNMB1,CACNA1C,ZEB1,MSRB3
Coexpression	MM16617	ZHANG_UTERUS_C11_SMOOTH_MUSCLE_CELL	M8: Cell Type Signature	5.396e-13	5.03e-09	7.739e-11	7.52e-10	12	36	TPM1,TPM2,ACTA2,ACTG2,MYL9,CNN1,CRIP2,SMTN,MYH11,MYLK,TAGLN,CALD1
Coexpression Atlas	gudmap_kidney_P0_JuxtaGlom_Ren1_200	kidney_P0_JuxtaGlom_Ren1_top-relative-expression-ranked_200	Gudmap Mouse MOE430.2	5.465e-13	2.142e-09	1.552e-11	1.374e-10	24	177	PENK,ACTA2,MCAM,ACTG2,MYL9,FHL1,CNN1,COL8A1,COL12A1,FN1,RGS5,SOSTDC1,CCDC80,IGFBP7,PRKG1,DKK2,MYH11,GATA3,BGN,CCDC3,KCNMB1,TAGLN,EDNRA,AADAT
GO: Biological Process	GO:0048729	tissue morphogenesis		5.762e-13	3.3e-09	3e-10	2.769e-09	65	1141	TPM1,EPHB2,ACTA2,DACT2,MCAM,MCC,ACTG2,MEIS2,FZD1,HOXD11,UPK3A,ALDH1A3,AMOTL2,FST,FKBP1A,MRTFA,FOXC1,FOXC2,COL4A1,TEAD2,SFRP1,FN1,TNC,PODXL,WNT7A,WT1,SOSTDC1,STIL,AKAP12,NKD1,DKK1,IGFBP7,OSR1,CTNS,DCHS2,MYH11,ARHGAP24,MYLK,INHBA,GATA3,PARD6G,MARCKSL1,PTHLH,SULF1,ASTN2,CACNA1C,DDR1,CALD1,CAMK2G,ADAMTS5,LCP1,TFAP2A,LPAR1,GSK3B,EDNRA,TGFB2,TBX18,IFT52,GREM1,LY6E,CDH2,SMAD1,PHLDB2,TPBG,EPHA3
Coexpression Atlas	gudmap_kidney_adult_RenalCapsule_500	kidney_adult_RenalCapsule_top-relative-expression-ranked_500	Gudmap Mouse MOE430.2	5.81e-13	2.278e-09	1.639e-11	1.45e-10	36	408	VGLL3,PENK,ACTA2,ABCA9,FZD1,FST,LTBP4,COL8A1,SFRP1,COL12A1,MRAS,SGCD,CCDC80,POSTN,ARHGDIB,IGFBP7,OSR1,PRKG1,DKK2,HTRA1,GBP1,SLFN5,BGN,CYRIA,OLFML1,SULF1,TAGLN,KRT7,CALD1,ADAMTS5,LCP1,LPAR1,SEMA3D,HMCN1,LY6E,CDH12
Coexpression Atlas	gudmap_RNAseq_e15.5_Mesangium_2500	gudmap_RNAseq_e15.5_Mesangium_2500	Gudmap RNAseq	5.999e-13	2.352e-09	1.68e-11	1.487e-10	88	1863	TPM2,EYA4,RAMP2,RHOJ,PENK,ACTA2,ACTG2,FAM89B,MCM5,NREP,REEP2,ADCY2,FZD1,TUBB4A,FBN2,MYL9,UBE2H,HOXD11,LTBP4,HSPA2,CNN1,FOXC1,PDZD4,COL6A3,TEAD2,COL9A1,COL12A1,FN1,SEPTIN5,RGS5,TNC,WT1,ID3,CLDND1,CCDC80,CRABP2,CDC42EP3,AKAP12,POSTN,MOXD1,SCUBE2,NKD1,DKK1,IGFBP7,NSG1,GLIPR2,SNCG,DKK3,DKK2,ATP5F1C,MYADM,MYH11,ARHGAP24,ADAM19,MYLK,INHBA,GATA2,GATA3,GBP1,MARCKSL1,BRINP1,AIF1L,GDF10,DCX,NEFL,FBXL7,OLFM…
Coexpression	M39253	MENON_FETAL_KIDNEY_3_STROMAL_CELLS	C8: Cell Type Signature	6.011e-13	5.603e-09	8.49e-11	8.25e-10	16	81	TPM1,TPM2,MEIS2,COL4A1,COL6A3,SFRP1,FN1,TNC,AKAP12,POSTN,H19,MYLK,SULT1E1,TUBA1A,CALD1,UACA
Coexpression Atlas	PCBC_ratio_CardioEndothel_vs_SC_cfr-2X-p05	Cardiovascular Endothelial Cells_vs_Pluripotent Stem Cells-Confounder_removed-fold2.0_adjp0.05	PCBC_AltAnalyze	6.121e-13	2.399e-09	1.702e-11	1.506e-10	85	1767	CPA4,EPHB2,CDKN2A,TRAPPC5,CNTNAP3,MCAM,FAM89B,PICALM,KIAA1549L,UBE2H,ARHGAP31,EVA1A,ARHGAP29,ALDH1A3,AMOTL2,MARCHF4,PCDH10,FKBP1A,FOXC1,TOM1L2,COL4A1,SEMA3F,JCAD,COL8A1,COL13A1,FN1,DPYSL4,CDC42EP3,CRIP2,SMTN,WDR47,RND3,POSTN,ARHGDIB,DKK1,IGFBP7,ISG15,NSG1,GLIPR2,ITPRIP,CCN2,LIMCH1,SNCG,IFI6,DCBLD2,ATP2B4,DKK3,CNTNAP3B,PRSS2,MYADM,HTRA1,ARHGAP24,ADAM19,SPOCK1,GATA2,GBP1,P4HA3,FJX1,SLFN5,BGN,SULT1E…
Coexpression Atlas	PCBC_ratio_MESO-30 amniotic fluid MSC_vs_MESO-30 blastocyst_cfr-2X-p05	MESO-30 amniotic fluid MSC_vs_MESO-30 blastocyst-Confounder_removed-fold2.0_adjp0.05	PCBC_AltAnalyze	6.533e-13	2.561e-09	1.804e-11	1.596e-10	68	1245	EPHB2,PLPPR3,RCBTB2,REEP2,MEIS2,FZD1,CPT1C,PGAP1,PKM,ARHGAP29,ALDH1A3,SLITRK6,CNTN1,RBM38,SEMA3F,CCDC74B,COL9A1,COL9A2,LMF1,SFRP1,COL13A1,SFSWAP,ID3,SOSTDC1,DPYSL4,PREPL,AKAP12,MOXD1,DKK1,CYYR1,LIMCH1,SNCG,IL17RD,DCBLD2,MIAT,DKK3,H19,TCEAL7,SPOCK1,GAS1,GATA3,AIF1L,ZC4H2,SYT11,SULF1,NECTIN1,MAFB,KCNMB4,KAZN,DDHD2,TMEM231,WASF1,WNK2,PCDHGB6,DTX3,CNTRL,PCDHB10,RGS12,PLEKHG4B,NARF,SEMA3D,PIANP,MSANTD…
GO: Biological Process	GO:0009887	animal organ morphogenesis		7.012e-13	4.015e-09	3.346e-10	3.088e-09	84	1720	TPM1,EPHB2,CDKN2A,EYA4,CADM4,ACTA2,HLX,ACTG2,MEIS2,FZD1,FBN2,HOXD11,UPK3A,ALDH1A3,SLITRK6,FHL1,FST,KIF17,FKBP1A,PLS3,SDC1,FOXC1,WDR48,FOXC2,COL8A1,TEAD2,COL9A1,SFRP1,COL13A1,FN1,TNC,WNT7A,WT1,ID3,SOSTDC1,APLP1,STIL,AKAP12,SCUBE2,NKD1,DKK1,CELF1,OSR1,CCN2,CTNS,MIAT,DCHS2,MYH11,HTRA1,MYLK,INHBA,GAS1,GATA2,GATA3,FJX1,MEIS3,PTHLH,TUBA1A,SULF1,NFIB,NECTIN1,MAFB,DLX2,CACNA1C,DDR1,ZEB1,CALD1,CAMK2G,ADAM…
Coexpression Atlas	gudmap_dev lower uro neuro_e15.5_PelvicGanglion_Sox10_200	dev lower uro neuro_e15.5_PelvicGanglion_Sox10_top-relative-expression-ranked_200	Gudmap Mouse ST 1.0	7.724e-13	3.028e-09	2.108e-11	1.866e-10	22	148	EYA4,PENK,ACTA2,ACTG2,TUBB3,CNN1,COL6A3,COL12A1,POSTN,MOXD1,NSG1,SNCG,DCX,NEFL,SYT11,SULF1,STMN3,NNAT,DPYSL3,EDNRA,INA,HMCN1
Coexpression Atlas	Facebase_RNAseq_ratio_e9.5_MandibularArch_vs_MaxillaryArch_500	FacebaseRNAseq_ratio_e9.5_MandibularArch_vs_MaxillaryArch_top-relative-expression-ranked_500	FaceBase_RNAseq	7.743e-13	3.035e-09	2.108e-11	1.866e-10	39	479	IGSF8,ACTA2,ADCY2,KIAA1549L,SLITRK6,MMP11,LTBP4,COL6A3,COL8A1,CHODL,RGS5,TNC,SOSTDC1,CCDC80,POSTN,IGFBP7,ZNF43,OSR1,RAB15,DKK2,HTRA1,ARHGAP24,INHBA,P4HA3,NCAM2,DCX,COL24A1,OLFML1,NFIB,NRK,CCDC3,TAGLN,SHANK1,CACNA1C,TGFB2,SEMA3D,THBS2,SENP7,EPHA3
Coexpression Atlas	gudmap_developingLowerUrinaryTract_P2_bladder detrusor (LCM)_200	DevelopingLowerUrinaryTract_P2_bladder detrusor (LCM)_emap-30376_top-relative-expression-ranked_200	Gudmap Mouse MOE430.2	8.145e-13	3.193e-09	2.202e-11	1.949e-10	23	164	TPM2,ACTA2,ACTG2,TENM2,MYL9,SLITRK6,PLN,CNN1,SMTN,SCUBE2,PDE5A,MYH11,MYLK,GBP1,PTHLH,KCNMB1,TAGLN,GLIPR1,NIPAL4,NT5E,ACTR3B,MSRB3,THBS2
Coexpression	M38992	MEBARKI_HCC_PROGENITOR_FZD8CRD_UP	C2:CGP: Chemical and Genetic Perturbations	8.501e-13	7.925e-09	1.183e-10	1.149e-09	39	586	CPA4,HLX,MCM5,HMMR,ARHGAP31,ANLN,RAD54B,MEX3B,SEPTIN5,ID3,CCDC80,STIL,CRABP2,CDC42EP3,SMTN,UHRF1,IL17RD,MYCL,SERPINB7,CCP110,PARD6G,MELK,ANOS1,TUBA1A,BUB1,NKAIN1,NT5E,SAE1,STMN1,ADAMTS8,ADAMTS5,CDCA8,RGS12,RFWD3,SLC7A5,UBASH3B,PLEKHO1,ARHGAP19,RASD2
Coexpression Atlas	PCBC_ratio_ECTO_vs_SC_cfr-2X-p05	Ectoderm Differentiated Cells_vs_Pluripotent Stem Cells-Confounder_removed-fold2.0_adjp0.05	PCBC_AltAnalyze	9.309e-13	3.649e-09	2.499e-11	2.212e-10	75	1466	TTYH1,MAP2,CADM4,ACTA2,CNTNAP3,MCAM,FAM89B,PLPPR3,RCBTB2,MEIS2,FZD1,FBN2,MEX3A,UBE2H,CPT1C,PGAP1,AMOTL2,FST,LTBP4,MEX3B,CAP2,SEMA3F,KLF11,LRP12,COL9A2,TNC,SESN3,APLP1,CCDC80,CRABP2,PREPL,SH2B1,ARL4D,SCUBE2,IGFBP7,ZKSCAN1,SCMH1,TTC17,CCN2,MIAT,H19,ADAM19,SPOCK1,GAS1,FJX1,MEIS3,DENND2B,NUAK1,SYT11,SULF1,SGCE,MAFB,GPC2,DDHD2,PCBP4,GPC1,ZFP90,PCDHGB6,DTX3,DUSP4,PCDHB10,RGS12,ZNF503,NBPF15,PIANP,SOX21…
GO: Biological Process	GO:0097485	neuron projection guidance		9.782e-13	5.601e-09	4.309e-10	3.977e-09	35	389	EPHB2,EPHB6,E2F7,TENM2,ADCY1,TUBB3,SEMA5B,PLS3,CNTN1,FOXC1,FOXC2,SEMA3F,ISLR2,COL6A3,CHODL,TNC,DPYSL4,CCDC80,CRMP1,GAS1,GATA3,TUBB2B,ANOS1,NFIB,NECTIN1,NOVA1,NOVA2,DPYSL3,EDNRA,TGFB2,PLEKHG4B,SEMA3D,EGR2,CDH2,EPHA3
Coexpression	M17923	BOQUEST_STEM_CELL_CULTURED_VS_FRESH_UP	C2:CGP: Chemical and Genetic Perturbations	9.938e-13	9.264e-09	1.362e-10	1.324e-09	33	428	TPM2,TRPC4,LTBP4,KLF11,FN1,RGS5,PODXL,CDC42EP3,ARHGDIB,MOXD1,DKK1,LIMCH1,DKK2,INHBA,SYNC,GDF10,DCX,MELK,OLFML2A,SULF1,NFIB,MAFB,NOVA1,GLIPR1,KRT7,PLXDC1,TSC22D3,RGS4,TGFB2,SLC7A5,GREM1,CDH2,EPHA3
Coexpression Atlas	gudmap_dev gonad_e13.5_M_InterstitTestis_Sma_k1_1000	dev gonad_e13.5_M_InterstitTestis_Sma_k-means-cluster#1_top-relative-expression-ranked_1000	Gudmap Mouse ST 1.0	1.028e-12	4.029e-09	2.741e-11	2.426e-10	25	199	MAP2,ADCY2,TUBB4A,FBN2,MYL9,MEX3B,TEAD2,RGS5,CRABP2,POSTN,NKD1,NSG1,PRKG1,MYH11,PARD6G,DENND2B,SULF1,ZNF558,NNAT,DNMT3A,EHBP1,KRT7,PLXDC1,EGR2,CCBE1
Coexpression	M15484	ONDER_CDH1_SIGNALING_VIA_CTNNB1	C2:CGP: Chemical and Genetic Perturbations	1.09e-12	1.016e-08	1.472e-10	1.431e-09	16	84	TPM1,EPHB2,ACTA2,NREP,MYL9,COL6A3,BIN1,PODXL,POSTN,IGFBP7,SPOCK1,BGN,ANOS1,TAGLN,LTBP2,GREM1
Coexpression Atlas	gudmap_developingLowerUrinaryTract_e14.5_ Genital tubercle M_1000_k2	DevelopingLowerUrinaryTract_e14.5_ Genital tubercle M_emap-6706_k-means-cluster#2_top-relative-expression-ranked_1000	Gudmap Mouse MOE430.2	1.172e-12	4.595e-09	3.105e-11	2.748e-10	22	151	EYA4,MAP2,BACH2,RCBTB2,UBE2E3,MEX3B,COL8A1,COL9A1,SPOCK1,GAS2,NEFL,COL24A1,SULF1,ST8SIA4,DPYSL3,PCDHB10,LPAR1,EDNRA,TGFB2,SERTAD4,CDH2,EPHA3
Coexpression Atlas	gudmap_kidney_P0_JuxtaGlom_Ren1_k3_1000	kidney_P0_JuxtaGlom_Ren1_k-means-cluster#3_top-relative-expression-ranked_1000	Gudmap Mouse MOE430.2	1.22e-12	4.784e-09	3.211e-11	2.842e-10	30	293	TPM2,ACTA2,MCAM,ACTG2,TUBB4A,MYL9,HOXD11,FHL1,CNN1,CAP2,FOXC2,FN1,RGS5,AKAP12,SNCG,ATP2B4,H19,MYH11,INHBA,P4HA3,FJX1,NTM,NRK,CCDC3,KCNMB1,TAGLN,CACNA1C,ADAMTS8,EDNRA,TGFB2
Coexpression	M7617	BENPORATH_EED_TARGETS	C2:CGP: Chemical and Genetic Perturbations	1.403e-12	1.308e-08	1.868e-10	1.816e-09	54	1059	TTYH1,EYA4,BACH2,PENK,HLX,CSMD3,FZD1,FBN2,CLCN5,HOXD11,PCDH10,FOXC1,COL9A2,SFRP1,COL12A1,CHODL,OLFML2B,WNT7A,WT1,POU3F1,SLITRK3,MOXD1,DKK1,IGFBP7,OSR1,GLIPR2,CCN2,PRKG1,DKK2,DCHS2,HTRA1,B4GALNT1,DOCK11,GATA2,GATA3,C11orf87,LAMP5,PDE10A,PTHLH,NEFL,COL24A1,ANOS1,ASTN2,MAFB,DLX2,GRIN3A,DUSP4,ADAMTS5,ZNF503,TGFB2,SOX21,INA,CCBE1,LTBP2
GO: Biological Process	GO:0030198	extracellular matrix organization		1.415e-12	8.103e-09	5.788e-10	5.342e-09	35	394	RAMP2,ANLN,MMP11,LTBP4,FOXC1,FOXC2,COL4A1,COL8A1,COL9A1,COL9A2,COL12A1,COL13A1,FN1,OLFML2B,WT1,APLP1,CCDC80,POSTN,CCN2,PRSS2,MYH11,GAS2,OLFML2A,COL24A1,SULF1,DDR1,ADAMTS8,ADAMTS5,LCP1,TFAP2A,TGFB2,HMCN1,TLL2,GREM1,PHLDB2
GO: Biological Process	GO:0043062	extracellular structure organization		1.522e-12	8.717e-09	5.812e-10	5.364e-09	35	395	RAMP2,ANLN,MMP11,LTBP4,FOXC1,FOXC2,COL4A1,COL8A1,COL9A1,COL9A2,COL12A1,COL13A1,FN1,OLFML2B,WT1,APLP1,CCDC80,POSTN,CCN2,PRSS2,MYH11,GAS2,OLFML2A,COL24A1,SULF1,DDR1,ADAMTS8,ADAMTS5,LCP1,TFAP2A,TGFB2,HMCN1,TLL2,GREM1,PHLDB2
Coexpression Atlas	Arv_EB-LF_2500_K2	AravindRamakr_EmbryoidBody-LF_top-relative-expression-ranked_2500_k-means-cluster#2	PCBC	1.526e-12	5.984e-09	3.989e-11	3.531e-10	57	951	CDKN2A,VGLL3,BACH2,PENK,ACTG2,EVA1A,UPK3A,FOXC2,COL4A1,COL6A3,COL8A1,COL12A1,FN1,OLFML2B,SOSTDC1,APLP1,CCDC80,IFIT1,CDC42EP3,POSTN,MOXD1,IGFBP7,OSR1,CCN2,DCBLD2,MIAT,DKK2,H19,INHBA,PCDHB5,GAS1,P4HA3,NCAM2,GDF10,DCX,BGN,NEFL,OLFML1,SULF1,NRK,DLX2,NNAT,TAGLN,GLIPR1,PCDHGB6,NT5E,RGS4,TGFB2,SEMA3D,THBS2,HMCN1,PAK3,LTBP2,PWWP3B,GREM1,LY6H,EPHA3
Coexpression	M39055	MANNO_MIDBRAIN_NEUROTYPES_HRGL2A	C8: Cell Type Signature	1.765e-12	1.645e-08	2.317e-10	2.252e-09	39	600	TTYH1,CADM4,MCC,CHST6,RFTN2,CSMD3,FABP5,SEMA5B,FHL1,CAP2,TOM1L2,COL8A1,SFRP1,TNC,NLGN4Y,WNT7A,SESN3,LRRN3,CCN2,LIMCH1,ATP2B4,DKK3,HTRA1,NCAM2,TUBB2B,AIF1L,DENND2B,ANOS1,NFIB,NRK,KCNMB1,IFI44L,TMEM231,GPC1,DTNA,UBXN1,SOX21,EGR2,EPHA3
GO: Biological Process	GO:0048667	cell morphogenesis involved in neuron differentiation		1.769e-12	1.013e-08	6.331e-10	5.844e-09	55	889	EPHB2,EPHB6,MAP2,E2F7,TENM2,ADCY1,PICALM,TUBB3,SEMA5B,SLITRK6,PLS3,CNTN1,FOXC1,FOXC2,TRIM46,SEMA3F,ISLR2,COL6A3,FN1,CHODL,TNC,WNT7A,APLP1,CCDC80,SLITRK3,CRABP2,CRMP1,WDR47,PRKG1,GAS1,GATA3,PARD6G,TUBB2B,DCX,NEFL,ANOS1,NFIB,NECTIN1,NOVA1,NOVA2,SHANK1,DPYSL3,STMN1,RGS4,GSK3B,EDNRA,TGFB2,PLEKHG4B,SEMA3D,EGR2,PAK3,CDH2,RBFOX2,TPBG,EPHA3
Coexpression Atlas	gudmap_developingLowerUrinaryTract_e13.5_bladder neck-urethr mesench_500	DevelopingLowerUrinaryTract_e13.5_bladder neck-urethr mesench_emap-3087_top-relative-expression-ranked_500	Gudmap Mouse MOE430.2	1.809e-12	7.09e-09	4.655e-11	4.12e-10	36	424	EYA4,ACTG2,CSRNP3,SLITRK6,PCDH10,UBE2E3,CNTN1,KLF11,COL8A1,COL9A1,CRMP1,RND3,MOXD1,DKK1,DKK2,SPOCK1,C11orf87,NCAM2,BRINP1,DCX,NEFL,COL24A1,ST6GAL2,CYRIA,SYT11,STMN3,GRIN3A,ST8SIA4,DPYSL3,PCDHB10,ADAMTS5,RGS4,TTLL7,EGR2,SERTAD4,EPHA3
Coexpression Atlas	Facebase_RNAseq_e10.5_Neural Epithelium Overlying Lateral Eminence_1000	FacebaseRNAseq_e10.5_Neural Epithelium Overlying Lateral Eminence_top-relative-expression-ranked_1000	FaceBase_RNAseq	1.814e-12	7.11e-09	4.655e-11	4.12e-10	58	983	EPHB2,TTYH1,MAP2,MEIS2,TUBB3,TUBB4A,KIAA1549L,SEMA5B,SLITRK6,MMP11,FHL1,LTBP4,MGAT5B,COL6A3,COL8A1,SFRP1,CHODL,RGS5,TNC,WNT7A,SOSTDC1,DPYSL4,POU3F1,POSTN,TAF9B,IGFBP7,ZNF43,DLL3,OSR1,DKK2,INHBA,P4HA3,C11orf87,NCAM2,TUBB2B,PDE10A,DCX,SYT11,NFIB,NRK,CCDC3,DLX2,WNK2,NOVA1,DPYSL3,DTNA,MAMLD1,SEMA3D,SOX21,INA,GPR137C,TLE4,PAK3,TOX2,CDH2,EPB41,SENP7,EPHA3
Coexpression Atlas	gudmap_dev gonad_e13.5_F_VascAssocMesenchStromOvary_Sma_k1_1000	dev gonad_e13.5_F_VascAssocMesenchStromOvary_Sma_k-means-cluster#1_top-relative-expression-ranked_1000	Gudmap Mouse ST 1.0	1.817e-12	7.123e-09	4.655e-11	4.12e-10	27	240	MAP2,FBN2,CAP2,RGS5,CCDC80,CRABP2,POSTN,NKD1,NSG1,OSR1,PRKG1,MYH11,PARD6G,OLFML1,RBMS3,NFIB,NRK,ZNF558,MAFB,DNMT3A,KRT7,LPAR1,SEMA3D,EGR2,CCBE1,VASH2,PBX3
GO: Biological Process	GO:0045229	external encapsulating structure organization		1.893e-12	1.084e-08	6.376e-10	5.885e-09	35	398	RAMP2,ANLN,MMP11,LTBP4,FOXC1,FOXC2,COL4A1,COL8A1,COL9A1,COL9A2,COL12A1,COL13A1,FN1,OLFML2B,WT1,APLP1,CCDC80,POSTN,CCN2,PRSS2,MYH11,GAS2,OLFML2A,COL24A1,SULF1,DDR1,ADAMTS8,ADAMTS5,LCP1,TFAP2A,TGFB2,HMCN1,TLL2,GREM1,PHLDB2
Coexpression	M9898	BENPORATH_SUZ12_TARGETS	C2:CGP: Chemical and Genetic Perturbations	1.964e-12	1.831e-08	2.543e-10	2.471e-09	53	1035	TTYH1,ASIC2,PENK,HLX,CSMD3,FBN2,CLCN5,HOXD11,MGAT5B,PLS3,COL9A2,SFRP1,CHODL,OLFML2B,WNT7A,WT1,POU3F1,SLITRK3,CRMP1,NKD1,DKK1,OSR1,PRKG1,DKK2,DCHS2,HTRA1,B4GALNT1,GATA2,GATA3,C11orf87,LAMP5,PTHLH,NEFL,COL24A1,ANOS1,NRK,ASTN2,MAFB,DLX2,GRIN3A,ST8SIA4,TSC22D3,DUSP4,ADAMTS5,OPRK1,ZNF503,SOX21,INA,EGR2,CCBE1,TLL2,LTBP2,TOX2
Coexpression Atlas	gudmap_kidney_P0_JuxtaGlom_Ren1_k4_500	kidney_P0_JuxtaGlom_Ren1_k-means-cluster#4_top-relative-expression-ranked_500	Gudmap Mouse MOE430.2	2.013e-12	7.891e-09	5.124e-11	4.535e-10	22	155	TPM2,ACTA2,MCAM,ACTG2,MYL9,FHL1,CNN1,CAP2,FN1,RGS5,SNCG,H19,MYH11,FJX1,NTM,NRK,CCDC3,KCNMB1,TAGLN,CACNA1C,EDNRA,TGFB2
Coexpression	M45674	HE_LIM_SUN_FETAL_LUNG_C0_MESENCHYMAL_1_CELL	C8: Cell Type Signature	2.15e-12	2.004e-08	2.745e-10	2.667e-09	27	294	TRAF5,CADM4,MCC,ACTG2,MEIS2,FBN2,ALDH1A3,CNN1,OLFML2B,CRABP2,NSG1,RASL11B,CNTNAP3B,GAS2,TUBB2B,DCX,NTM,CTXN1,GLIPR1,ZEB1,ADAMTS8,TLE4,LY6H,HSD17B14,PHLDB2,TPBG,EPHA3
Coexpression Atlas	Facebase_RNAseq_ratio_e9.5_MaxillaryArch_vs_Mandibular_2500_K5	FacebaseRNAseq_ratio_e9.5_MaxillaryArch_vs_Mandibular_top-relative-expression-ranked_2500_k-means-cluster#5	FaceBase_RNAseq	2.176e-12	8.53e-09	5.503e-11	4.871e-10	49	743	EPHB2,TTYH1,MAP2,MEIS2,TUBB3,TUBB4A,KIAA1549L,UBE2H,CSRNP3,SEMA5B,CPT1C,PGAP1,PCDH10,LTBP4,MGAT5B,IGLON5,COL8A1,STARD4,POGK,WNT7A,DPYSL4,APLP1,ZNF43,SCMH1,NCAM2,TUBB2B,BRINP1,DCX,CYRIA,TUBA1A,SYT11,SULF1,NTM,ZNF558,ASTN2,SGCE,WNK2,SHANK1,DDR1,DTNA,MAMLD1,TAMALIN,PIANP,GPR137C,TLE4,PAK3,TOX2,SENP7,EPHA3
Coexpression	M1920	CHEN_METABOLIC_SYNDROM_NETWORK	C2:CGP: Chemical and Genetic Perturbations	2.225e-12	2.074e-08	2.779e-10	2.7e-09	59	1242	IGSF8,TRAF5,RHOJ,TRPC4,MCM5,RFTN2,PICALM,TUBB4A,CLCN5,EVA1A,PKM,FHL1,FKBP1A,COL4A1,COL6A3,COL8A1,LRP12,TNC,TUBB,WT1,POU3F1,CCDC80,POSTN,ARHGDIB,RAB15,IL17RD,FAM131B,MYADM,HTRA1,ADAM19,DOCK11,GDF10,BGN,TUBA1A,RBMS3,SULF1,CCDC3,MAFB,ST8SIA4,WASF1,DNMT3A,SHANK1,GLIPR1,DPYSL3,ZFP90,PLXDC1,LCP1,ZNF503,SLC7A8,THBS2,LMNA,FRMD6,EGR2,TLE4,LTBP2,TNFAIP2,UBASH3B,PLEKHO1,EPB41
Coexpression	M45678	HE_LIM_SUN_FETAL_LUNG_C0_MID_AIRWAY_SMC_2_CELL	C8: Cell Type Signature	2.236e-12	2.084e-08	2.779e-10	2.7e-09	22	189	TRAF5,ACTG2,PLN,CNN1,CAP2,RBM38,CDC42EP3,MYH11,ADAM19,INHBA,SYNC,ANOS1,SYT11,CCDC3,KCNMB1,ZEB1,DTNA,ADAMTS8,ADAMTS5,MSRB3,THBS2,LTBP2
Coexpression Atlas	GSM777067_100	Stromal Cells, St.31-38-44-.SLN, CD45- gp38- CD31- CD44-, Lymph Node, avg-2	Immgen.org, GSE15907	2.29e-12	8.978e-09	5.755e-11	5.094e-10	17	85	ACTA2,MYL9,PLS3,COL6A3,FN1,RGS5,CCDC80,CRIP2,POSTN,IGFBP7,MYH11,HTRA1,BGN,TAGLN,CALD1,RGS4,EDNRA
Coexpression Atlas	gudmap_developingLowerUrinaryTract_P1_bladder_500_B	DevelopingLowerUrinaryTract_P1_bladder_B_emap-30374_top-relative-expression-ranked_500	Gudmap Mouse MOE430.2	2.378e-12	9.322e-09	5.937e-11	5.255e-10	34	384	TPM1,TPM2,VGLL3,RHOJ,ACTA2,ACTG2,TENM2,MYL9,UPK3A,CNN1,COL8A1,RGS5,SMTN,SCUBE2,OSR1,MYH11,MYLK,GBP1,C11orf87,PTHLH,NRK,KCNMB1,TAGLN,GLIPR1,KRT7,NIPAL4,DPYSL3,CALD1,NT5E,DTNA,CAMK2G,PSCA,THBS2,TNFAIP2
Coexpression	M41659	TRAVAGLINI_LUNG_ALVEOLAR_EPITHELIAL_TYPE_1_CELL	C8: Cell Type Signature	2.398e-12	2.236e-08	2.942e-10	2.859e-09	31	391	EYA4,MAP2,MYL9,EVA1A,ARHGAP29,FHL1,PLS3,SDC1,COL4A1,COL8A1,COL12A1,FN1,WNT7A,CRIP2,IGFBP7,ITPRIP,CCN2,LIMCH1,ATP2B4,MYADM,DOCK11,ANOS1,NTM,SGCE,TAGLN,KRT7,TTLL7,C1orf198,CCBE1,PLEKHO1,PHLDB2
Coexpression Atlas	Facebase_RNAseq_ratio_e10.5_MaxillaryArch_vs_Mandibular_2500_K2	FacebaseRNAseq_ratio_e10.5_MaxillaryArch_vs_Mandibular_top-relative-expression-ranked_2500_k-means-cluster#2	FaceBase_RNAseq	2.644e-12	1.037e-08	6.492e-11	5.746e-10	49	747	EPHB2,TTYH1,MAP2,MEIS2,KIAA1549L,UBE2H,CSRNP3,SEMA5B,CPT1C,PGAP1,PCDH10,LTBP4,MGAT5B,IGLON5,COL8A1,SFRP1,STARD4,POGK,WNT7A,DPYSL4,APLP1,MANBAL,ZNF43,SCMH1,NCAM2,TUBB2B,BRINP1,DCX,CYRIA,TUBA1A,SYT11,SULF1,ZNF558,ASTN2,SGCE,WNK2,SHANK1,DDR1,DTNA,MAMLD1,GAL3ST4,TAMALIN,PIANP,GPR137C,TLE4,PAK3,SENP7,TPBG,EPHA3
Coexpression Atlas	Facebase_RNAseq_e9.5_Maxillary Arch_2500_K2	FacebaseRNAseq_e9.5_Maxillary Arch_top-relative-expression-ranked_2500_k-means-cluster#2	FaceBase_RNAseq	2.644e-12	1.037e-08	6.492e-11	5.746e-10	49	747	EPHB2,TTYH1,MAP2,BACH2,MEIS2,KIAA1549L,UBE2H,CSRNP3,SEMA5B,CPT1C,PCDH10,LTBP4,MGAT5B,IGLON5,COL8A1,SFRP1,STARD4,POGK,WNT7A,DPYSL4,APLP1,ZNF43,SCMH1,NSG1,HTRA1,NCAM2,TUBB2B,BRINP1,DCX,ST6GAL2,CYRIA,TUBA1A,SYT11,SULF1,ZNF558,ASTN2,SGCE,NNAT,WNK2,SHANK1,DTNA,MAMLD1,TAMALIN,PIANP,GPR137C,TLE4,PAK3,SENP7,EPHA3
Coexpression Atlas	PCBC_ratio_SC_vs_PulmonMicrovasc_cfr-2X-p05	Pluripotent Stem Cells_vs_Pulmonary Microvascular-Confounder_removed-fold2.0_adjp0.05	PCBC_AltAnalyze	2.65e-12	1.039e-08	6.492e-11	5.746e-10	80	1655	IGSF8,TPM2,TTYH1,TRAF5,CADM4,CHST6,PLPPR3,NREP,REEP2,ADCY2,SBK1,TUBB4A,FBN2,MEX3A,MYL9,SEMA5B,CPT1C,PGAP1,RAD54B,TBC1D14,SDC1,IGLON5,CNN1,CAP2,RBM38,PCYT1B,WDR48,COL9A1,SFRP1,PODXL,SESN3,APLP1,CRABP2,CRMP1,ZNF43,NSG1,CYYR1,RASL11B,RAB15,IL17RD,SNRPN,MIAT,FAM131B,MYCL,TCEAL7,TUBB2B,MARCKSL1,BRINP1,MEIS3,AIF1L,ZC4H2,DENND2B,ANOS1,STMN3,NECTIN1,BUB1,ARHGEF9,SYT1,ASTN2,NKAIN1,GPC2,TAGLN,DNMT3A,CTXN1,…
Coexpression	M40313	DESCARTES_FETAL_THYMUS_STROMAL_CELLS	C8: Cell Type Signature	3.134e-12	2.922e-08	3.795e-10	3.687e-09	19	137	FBN2,LTBP4,SFRP1,COL12A1,CCDC80,CRABP2,POSTN,H19,GAS1,NCAM2,BGN,ANOS1,TSPAN17,NOVA1,ADAMTS5,ZNF503,THBS2,CDK2AP1,CCBE1
Coexpression Atlas	gudmap_developingLowerUrinaryTract_P2_bladder stroma (LCM)_1000_k3	DevelopingLowerUrinaryTract_P2_bladder stroma (LCM)_emap-30396_k-means-cluster#3_top-relative-expression-ranked_1000	Gudmap Mouse MOE430.2	3.818e-12	1.496e-08	9.295e-11	8.227e-10	26	229	TPM2,VGLL3,RHOJ,ACTA2,ACTG2,FHL1,CNN1,CNTN1,COL12A1,CHODL,TNC,IGFBP7,PDE5A,CCN2,DKK3,MYH11,MYLK,GBP1,BGN,TAGLN,NIPAL4,NT5E,ADAMTS5,MSRB3,THBS2,LMNA
Coexpression Atlas	gudmap_developingKidney_e15.5_Podocyte cells_1000_k3	DevelopingKidney_e15.5_Podocyte cells_emap-27915_k-means-cluster#3_top-relative-expression-ranked_1000	Gudmap Mouse MOE430.2	3.864e-12	1.515e-08	9.35e-11	8.276e-10	22	160	EYA4,PENK,ACTA2,ACTG2,TENM2,FZD1,CNTN1,COL9A1,POU3F1,AKAP12,PDE5A,DKK3,MYH11,MYLK,GBP1,GDF10,CYRIA,NT5E,TBX18,THBS2,TPBG,EPHA3
Coexpression Atlas	gudmap_dev lower uro neuro_e14.5_PelvicGanglion_Sox10_200	dev lower uro neuro_e14.5_PelvicGanglion_Sox10_top-relative-expression-ranked_200	Gudmap Mouse ST 1.0	4.112e-12	1.612e-08	9.83e-11	8.7e-10	24	194	EYA4,PENK,ACTA2,ACTG2,TUBB3,TUBB4A,COL6A3,CRABP2,CRMP1,MOXD1,NSG1,OSR1,SNCG,GATA2,GATA3,NEFL,SYT11,SULF1,STMN3,SYT1,KRT7,DPYSL3,EDNRA,INA
Coexpression Atlas	gudmap_dev lower uro neuro_e14.5_BladdPelvicGanglion_Sox10_200	dev lower uro neuro_e14.5_BladdPelvicGanglion_Sox10_top-relative-expression-ranked_200	Gudmap Mouse ST 1.0	4.112e-12	1.612e-08	9.83e-11	8.7e-10	24	194	CSMD3,TUBB3,TUBB4A,SLITRK6,PCDH10,CRMP1,POSTN,MOXD1,NSG1,SNCG,SNRPN,GATA3,NCAM2,DCX,NEFL,SYT11,STMN3,NRK,SYT1,NNAT,NOVA1,DPYSL3,RGS4,INA
GO: Biological Process	GO:0072359	circulatory system development		4.164e-12	2.385e-08	1.321e-09	1.219e-08	90	1974	TPM1,EPHB2,EPHB6,EYA4,RAMP2,RHOJ,CADM4,ACTA2,MCAM,E2F7,HLX,ADCY2,MEIS2,FZD1,FBN2,PKM,AMOTL2,FHL1,PLN,FKBP1A,FOXC1,FOXC2,COL4A1,JCAD,COL8A1,TEAD2,SFRP1,FN1,SGCD,WNT7A,WT1,ID3,STIL,CRIP2,NKD1,DKK1,IGFBP7,OSR1,TTC17,CCN2,DCBLD2,ATP2B4,SERPINB7,MYH11,ARHGAP24,ADAM19,MYLK,INHBA,GATA2,GATA3,PARD6G,MARCKSL1,PTHLH,SEPTIN6,SULF1,ARHGEF9,MAFB,TMEM231,SLC12A6,CACNA1C,SASH1,CALD1,PLXDC1,CAMK2G,CNTRL,ADAMTS5,…
Coexpression Atlas	gudmap_developingGonad_e11.5_testes_500	DevelopingGonad_e11.5_testes_emap-3226_top-relative-expression-ranked_500	Gudmap Mouse MOE430.2	4.366e-12	1.711e-08	1.037e-10	9.18e-10	36	437	RAMP2,BACH2,HMMR,SBK1,TUBB3,FKBP1A,MEX3B,FOXC2,COL9A1,SFRP1,SFSWAP,DPYSL4,APLP1,CRABP2,CRMP1,NKD1,DLL3,SNRPN,GAS1,RBM26,TUBB2B,NEFL,SYT11,NNAT,PCBP4,CTXN1,DDR1,DPYSL3,CALD1,CAMK2G,GSK3B,EDNRA,ZNF503,INA,PSME3,EPHA3
GO: Biological Process	GO:0007411	axon guidance		4.383e-12	2.51e-08	1.321e-09	1.219e-08	34	388	EPHB2,EPHB6,E2F7,TENM2,ADCY1,TUBB3,SEMA5B,PLS3,CNTN1,FOXC1,FOXC2,SEMA3F,ISLR2,COL6A3,CHODL,TNC,CCDC80,CRMP1,GAS1,GATA3,TUBB2B,ANOS1,NFIB,NECTIN1,NOVA1,NOVA2,DPYSL3,EDNRA,TGFB2,PLEKHG4B,SEMA3D,EGR2,CDH2,EPHA3
Coexpression	M39288	DURANTE_ADULT_OLFACTORY_NEUROEPITHELIUM_IMMATURE_NEURONS	C8: Cell Type Signature	4.645e-12	4.33e-08	5.551e-10	5.394e-09	19	140	TUBB,APLP1,CRMP1,NSG1,SPOCK1,TUBB2B,MARCKSL1,DCX,TUBA1A,SYT11,STMN3,SYT1,RAB6A,DPYSL3,STMN1,TTLL7,INA,EPB41,ARMH4
GO: Biological Process	GO:0000904	cell morphogenesis involved in differentiation		4.933e-12	2.824e-08	1.412e-09	1.303e-08	58	996	EPHB2,EPHB6,MAP2,DACT2,E2F7,TENM2,ADCY1,PICALM,TUBB3,SEMA5B,SLITRK6,PLS3,CNTN1,FOXC1,FOXC2,TRIM46,SEMA3F,ISLR2,COL6A3,FN1,CHODL,TNC,WNT7A,APLP1,CCDC80,SLITRK3,CRABP2,CRMP1,WDR47,DKK1,PRKG1,GAS1,GATA3,PARD6G,TUBB2B,DCX,NEFL,ANOS1,NFIB,NECTIN1,NOVA1,NOVA2,SHANK1,DPYSL3,STMN1,RGS4,GSK3B,EDNRA,TGFB2,PLEKHG4B,SEMA3D,FRMD6,EGR2,PAK3,CDH2,RBFOX2,TPBG,EPHA3
Coexpression Atlas	gudmap_RNAseq_p2_CD2APMEISWT_2500_K4	gudmap_RNAseq_p2_CD2APMEISWT_2500_K4	Gudmap RNAseq	5.274e-12	2.067e-08	1.245e-10	1.102e-09	52	842	CADM4,TRPC4,ACTA2,MCAM,ABCA9,EHD3,MYL9,PROM2,FHL1,PLN,PLS3,IGLON5,FOXC1,COL4A1,COL6A3,COL12A1,RGS5,OLFML2B,WT1,CCDC80,CDC42EP3,ARHGDIB,IGFBP7,ISG15,RASL11B,PDE5A,CCN2,PRKG1,SNCG,DKK2,MYH11,HTRA1,MYLK,GATA3,GBP1,PARD6G,SLFN5,GDF10,BGN,TSPAN17,RBMS3,KCNMB1,TAGLN,CALD1,NT5E,DTX3,ADAMTS5,RGS4,MSRB3,SLC7A8,C1orf198,TNFAIP2
Coexpression	M40167	DESCARTES_FETAL_CEREBRUM_VASCULAR_ENDOTHELIAL_CELLS	C8: Cell Type Signature	5.279e-12	4.921e-08	6.229e-10	6.053e-09	38	593	ACTA2,DACT2,MCAM,ABCA9,ARHGAP29,FOXC1,FOXC2,COL4A1,JCAD,KLF11,FN1,RGS5,ID3,CRIP2,DKK1,IGFBP7,ISG15,CYYR1,LYPD3,CCN2,IFI6,GATA2,SLFN5,BGN,SULT1E1,OLFML2A,OLFML1,CCDC3,TAGLN,UACA,PLXDC1,EDNRA,ZNF503,TBX18,HMCN1,SLC7A5,PHLDB2,RASD2
Coexpression Atlas	BM Top 100 - urethra	BM Top 100 - urethra	Body Map	5.49e-12	2.152e-08	1.287e-10	1.139e-09	16	77	TPM2,ACTA2,ACTG2,MYL9,SLITRK6,PLN,CNN1,COL6A3,POSTN,H19,MYH11,SULF1,TAGLN,PSCA,EDNRA,EPHA3
Coexpression Atlas	gudmap_developingGonad_e11.5_testes_1000	DevelopingGonad_e11.5_testes_emap-3226_top-relative-expression-ranked_1000	Gudmap Mouse MOE430.2	5.514e-12	2.161e-08	1.287e-10	1.139e-09	52	843	RAMP2,BACH2,FAM89B,HMMR,KATNAL1,MEIS2,CNOT6,SBK1,TUBB3,MEX3A,PKM,FKBP1A,MEX3B,FOXC1,FOXC2,COL9A1,SFRP1,SFSWAP,WT1,CLDND1,DPYSL4,APLP1,CRABP2,CRMP1,NKD1,ZFP64,DLL3,SNRPN,GAS1,RBM26,TUBB2B,FJX1,NEFL,SYT11,NNAT,PCBP4,CTXN1,DDR1,DPYSL3,CALD1,CAMK2G,GAL3ST4,GSK3B,EDNRA,ZNF503,KATNBL1,INA,PSME3,PLEKHO1,SMAD1,RBFOX2,EPHA3
Coexpression Atlas	gudmap_developingLowerUrinaryTract_e14.5_ bladder_1000_k4	DevelopingLowerUrinaryTract_e14.5_ bladder_emap-30872_k-means-cluster#4_top-relative-expression-ranked_1000	Gudmap Mouse MOE430.2	5.991e-12	2.348e-08	1.39e-10	1.23e-09	20	132	TPM2,PDE4D,RHOJ,ACTA2,ACTG2,MYL9,UPK3A,CNN1,CAP2,OSR1,MYH11,MYLK,GBP1,NFIB,KCNMB1,TAGLN,NIPAL4,CALD1,MSRB3,THBS2
Coexpression	M1834	BOQUEST_STEM_CELL_UP	C2:CGP: Chemical and Genetic Perturbations	6.162e-12	5.745e-08	7.181e-10	6.978e-09	25	262	MEIS2,FST,PLN,COL6A3,TNC,SGCD,OLFML2B,CRABP2,DKK2,MYH11,HTRA1,SPOCK1,INHBA,GAS1,GDF10,DCX,OLFML1,SGCE,MAFB,NOVA1,NT5E,LPAR1,TGFB2,THBS2,LTBP2
Coexpression	M7548	GSE21546_UNSTIM_VS_ANTI_CD3_STIM_DP_THYMOCYTES_UP	C7:IMMUNESIGDB: ImmuneSigDB	6.336e-12	5.906e-08	7.292e-10	7.086e-09	22	199	CPA4,MAP2,NREP,EHD3,AMOTL2,LRP12,FN1,WDR47,RND3,RAB15,CCN2,ATP2B4,DKK2,MYADM,ADAM19,NUAK1,EXOC6B,SYT1,KCNMB4,TAGLN,RAB6A,LPAR1
Coexpression Atlas	gudmap_developingKidney_e15.5_Ureteral Smooth Musc_200	DevelopingKidney_e15.5_Ureteral Smooth Musc_emap-28812_top-relative-expression-ranked_200	Gudmap Mouse MOE430.2	6.394e-12	2.507e-08	1.474e-10	1.305e-09	22	164	TPM2,EYA4,ACTA2,ACTG2,CNN1,CAP2,CNTN1,COL9A1,POU3F1,GIGYF2,PDE5A,DKK3,MYH11,MYLK,CYRIA,TAGLN,ST8SIA4,NT5E,MSRB3,TBX18,RBFOX2,TPBG
Coexpression	M46419	MA_RAT_AGING_DN	C2:CGP: Chemical and Genetic Perturbations	6.739e-12	6.282e-08	7.662e-10	7.445e-09	20	161	TPM1,TPM2,ACTA2,ACTG2,MYL9,FHL1,CNN1,COL4A1,FN1,ID3,SOSTDC1,CCDC80,RND3,POSTN,IGFBP7,MYH11,HTRA1,BGN,TUBA1A,TAGLN
Coexpression	M39132	AIZARANI_LIVER_C33_STELLATE_CELLS_2	C8: Cell Type Signature	7.031e-12	6.554e-08	7.882e-10	7.659e-09	18	126	TPM1,TPM2,ACTA2,MCAM,MYL9,PLS3,COL4A1,RGS5,ID3,IGFBP7,PRKG1,MYH11,MYLK,BGN,RBMS3,CCDC3,CALD1,UACA
Coexpression	M40258	DESCARTES_FETAL_MUSCLE_SMOOTH_MUSCLE_CELLS	C8: Cell Type Signature	7.102e-12	6.621e-08	7.882e-10	7.659e-09	15	80	TRPC4,ACTA2,ACTG2,KIAA1549L,SEMA5B,PLN,RGS5,MYH11,B4GALNT1,SULT1E1,CCDC3,TAGLN,CACNA1C,EDNRA,ENTPD3
Coexpression Atlas	gudmap_dev gonad_e13.5_M_InterstitFLeydig_MafB_500	dev gonad_e13.5_M_InterstitFLeydig_MafB_top-relative-expression-ranked_500	Gudmap Mouse ST 1.0	7.206e-12	2.825e-08	1.639e-10	1.451e-09	32	356	VGLL3,ACTA2,ADCY2,FBN2,LTBP4,COL4A1,COL6A3,SFRP1,FN1,SOSTDC1,RND3,POSTN,LRRN3,IGFBP7,PDE5A,ATP2B4,ARHGAP24,INHBA,BGN,NUAK1,OLFML1,NRK,CALD1,PLXDC1,ADAMTS5,EDNRA,TGFB2,HMCN1,EGR2,PAK3,EPHA3,ARMH4
Coexpression Atlas	DevelopingLowerUrinaryTract_e14.5_ urogenital sinus_emap-6689_k1_1000	DevelopingLowerUrinaryTract_e14.5_ urogenital sinus_emap-6689_k-means-cluster#1_top-relative-expression-ranked_1000	Gudmap Mouse MOE430.2	7.216e-12	2.829e-08	1.639e-10	1.451e-09	25	217	MAP2,CSMD3,TUBB3,CNTN1,COL8A1,CRMP1,RND3,MIAT,SPOCK1,C11orf87,NCAM2,GDF10,DCX,NEFL,SYT11,STMN3,SYT1,GRIN3A,NNAT,NOVA1,DPYSL3,ADAMTS5,RGS4,INA,TPBG
Coexpression Atlas	gudmap_dev gonad_e12.5_M_InterstitLeydig_MafB_k2_500	dev gonad_e12.5_M_InterstitLeydig_MafB_k-means-cluster#2_top-relative-expression-ranked_500	Gudmap Mouse ST 1.0	7.235e-12	2.836e-08	1.639e-10	1.451e-09	22	165	TPM1,ACTA2,LTBP4,COL6A3,SFRP1,RND3,POSTN,LRRN3,UHRF1,PDE5A,ATP2B4,INHBA,BGN,OLFML1,NRK,CALD1,LPAR1,EDNRA,TGFB2,HMCN1,EGR2,ARMH4
Coexpression Atlas	gudmap_dev gonad_e11.5_F_GonadVasMes_Flk_500	dev gonad_e11.5_F_GonadVasMes_Flk_top-relative-expression-ranked_500	Gudmap Mouse ST 1.0	7.745e-12	3.036e-08	1.745e-10	1.544e-09	35	423	MEIS2,FBN2,MEX3A,MYL9,ARHGAP29,SLITRK6,FST,PLS3,CNN1,FOXC2,SFRP1,COL12A1,RGS5,PODXL,WT1,SESN3,CCDC80,CRABP2,RND3,POSTN,NKD1,UHRF1,PRKG1,H19,INHBA,OLFML1,RBMS3,SULF1,NRK,ZNF558,NNAT,CALD1,EDNRA,EGR2,PBX3
Coexpression Atlas	DevelopingLowerUrinaryTract_e14.5_ bladder_emap-6668_1000	DevelopingLowerUrinaryTract_e14.5_ bladder_emap-6668_top-relative-expression-ranked_1000	Gudmap Mouse MOE430.2	8.679e-12	3.402e-08	1.944e-10	1.721e-09	51	826	TRAF5,VGLL3,PDE4D,ACTA2,ACTG2,RCBTB2,ABCA9,ANLN,UPK3A,SLITRK6,PLN,UBE2E3,MEX3B,CAP2,COL8A1,STARD4,AKAP12,RND3,CYYR1,PDE5A,PRKG1,DKK3,MYH11,ADAM19,MYLK,GBP1,C11orf87,BRINP1,NEFL,ST6GAL2,CYRIA,SULF1,NFIB,NRK,ZBTB21,KCNMB1,TAGLN,ST8SIA4,GLIPR1,NIPAL4,ACTR3B,RGS4,TTLL7,MSRB3,TBX18,SEMA3D,THBS2,PSME3,CDH2,RBFOX2,ARMH4
Coexpression	M1533	CUI_TCF21_TARGETS_2_DN	C2:CGP: Chemical and Genetic Perturbations	1.001e-11	9.328e-08	1.097e-09	1.066e-08	46	850	TPM1,VGLL3,CTTNBP2,ATXN7L1,MCC,HLX,TENM2,ADCY1,EHD3,ARHGAP31,ARHGAP29,SLITRK6,FOXC1,FOXC2,JCAD,COL12A1,CDC42EP3,CYYR1,CCN2,PRKG1,DKK2,MYADM,HTRA1,ARHGAP24,GATA3,AIF1L,SLFN5,PDE10A,DENND2B,CYRIA,TMCC2,MAFB,ST8SIA4,GPC1,SLC12A6,KRT7,UACA,NT5E,DTNA,ZBTB8A,ADAMTS5,CBFA2T3,TTLL7,MSRB3,FRMD6,TLE4
Coexpression	M45696	HE_LIM_SUN_FETAL_LUNG_C1_INTERM_NEUROENDOCRINE_CELL	C8: Cell Type Signature	1.014e-11	9.452e-08	1.099e-09	1.068e-08	25	268	EYA4,CTTNBP2,MAP2,ADCY1,REEP2,ADCY2,TUBB3,SLITRK6,HSPA2,COL12A1,APLP1,CRMP1,MOXD1,DLL3,MIAT,INHBA,DCX,SYT11,STMN3,DPYSL3,DUSP4,CBFA2T3,RGS4,TTLL7,LY6H
Coexpression	M39274	DURANTE_ADULT_OLFACTORY_NEUROEPITHELIUM_FIBROBLASTS_STROMAL_CELLS	C8: Cell Type Signature	1.034e-11	9.636e-08	1.1e-09	1.069e-08	15	82	TPM1,TPM2,ACTA2,SFRP1,CRABP2,AKAP12,POSTN,IGFBP7,GATA2,BGN,CCDC3,TAGLN,GLIPR1,CALD1,TFAP2A
Coexpression	MM1018	CUI_TCF21_TARGETS_2_DN	M2:CGP: Chemical and Genetic Perturbations	1.039e-11	9.683e-08	1.1e-09	1.069e-08	47	883	TPM1,VGLL3,CTTNBP2,ATXN7L1,MCC,HLX,TENM2,ADCY1,EHD3,ARHGAP31,ARHGAP29,SLITRK6,FOXC1,FOXC2,JCAD,COL12A1,CDC42EP3,ZNF43,CYYR1,CCN2,PRKG1,DKK2,MYADM,HTRA1,ARHGAP24,GATA3,AIF1L,SLFN5,PDE10A,DENND2B,CYRIA,TMCC2,MAFB,ST8SIA4,GPC1,SLC12A6,KRT7,UACA,NT5E,DTNA,ZBTB8A,ADAMTS5,CBFA2T3,TTLL7,MSRB3,FRMD6,TLE4
Coexpression Atlas	gudmap_developingGonad_e11.5_testes_k5_500	DevelopingGonad_e11.5_testes_emap-3226_k-means-cluster#5_top-relative-expression-ranked_500	Gudmap Mouse MOE430.2	1.099e-11	4.31e-08	2.449e-10	2.167e-09	13	47	TUBB3,DPYSL4,APLP1,CRABP2,CRMP1,DLL3,TUBB2B,NEFL,SYT11,PCBP4,DPYSL3,GSK3B,INA
Coexpression	MM1075	PLASARI_TGFB1_TARGETS_10HR_DN	M2:CGP: Chemical and Genetic Perturbations	1.1e-11	1.026e-07	1.152e-09	1.12e-08	25	269	EYA4,MAP2,RCBTB2,HMMR,MEIS2,SBK1,MMP11,FOXC1,SESN3,IFIT1,RND3,LRRN3,OSR1,PDE5A,GAS1,GAS2,GBP1,FBXL7,SYT11,NFIB,BUB1,STMN1,ADAMTS5,PWWP3B,CDH2
Coexpression Atlas	gudmap_developingLowerUrinaryTract_e14.5_ Genital tubercle M_500	DevelopingLowerUrinaryTract_e14.5_ Genital tubercle M_emap-6706_top-relative-expression-ranked_500	Gudmap Mouse MOE430.2	1.152e-11	4.515e-08	2.551e-10	2.258e-09	35	429	VGLL3,EYA4,TENM2,FBN2,CSRNP3,SLITRK6,FST,PCDH10,UBE2E3,COL8A1,TNC,SOSTDC1,RND3,DKK1,LYPD3,GIGYF2,LIMCH1,DKK2,SERPINB7,SPOCK1,NEFL,COL24A1,ST6GAL2,NTM,DLX2,ST8SIA4,NT5E,GAL3ST4,EDNRA,TBX18,SERTAD4,PAK3,CDH2,TPBG,EPHA3
Coexpression	M2448	SWEET_KRAS_TARGETS_UP	C2:CGP: Chemical and Genetic Perturbations	1.242e-11	1.158e-07	1.286e-09	1.25e-08	15	83	TPM1,EPHB2,MYL9,COL4A1,IGFBP7,ATP2B4,DKK3,ADAM19,SPOCK1,DENND2B,NUAK1,TAGLN,GLIPR1,CALD1,TGFB2
Coexpression Atlas	BM Top 100 - saphenous vein	BM Top 100 - saphenous vein	Body Map	1.272e-11	4.987e-08	2.802e-10	2.48e-09	15	69	TPM1,TPM2,VGLL3,ACTA2,ACTG2,MYL9,PLN,CNN1,COL6A3,TNC,CCDC80,MYH11,SULF1,TAGLN,CALD1
Coexpression Atlas	gudmap_developingLowerUrinaryTract_e14.5_ urethra_1000_k3	DevelopingLowerUrinaryTract_e14.5_ urethra_emap-30892_k-means-cluster#3_top-relative-expression-ranked_1000	Gudmap Mouse MOE430.2	1.484e-11	5.816e-08	3.249e-10	2.876e-09	26	243	EYA4,CTTNBP2,SLITRK6,PCDH10,COL8A1,COL9A1,TNC,DPYSL4,CRMP1,MOXD1,TCEAL7,SPOCK1,GAS2,MARCKSL1,NEFL,SULF1,STMN3,ARHGEF9,GRIN3A,ST8SIA4,WASF1,DPYSL3,EDNRA,HMCN1,VASH2,EPHA3
Coexpression	M3955	GU_PDEF_TARGETS_UP	C2:CGP: Chemical and Genetic Perturbations	1.745e-11	1.627e-07	1.788e-09	1.737e-08	14	71	FZD1,MAP4K4,SDC1,COL4A1,COL6A3,COL13A1,FN1,TNC,CCN2,DKK3,SERPINB7,ZEB1,CDH2,SMAD1
Coexpression Atlas	PCBC_ratio_MESO-30 blastocyst_vs_MESO-30 amniotic fluid MSC_cfr-2X-p05	MESO-30 blastocyst_vs_MESO-30 amniotic fluid MSC-Confounder_removed-fold2.0_adjp0.05	PCBC_AltAnalyze	1.787e-11	7.003e-08	3.891e-10	3.444e-09	48	761	CPA4,TPM1,TPM2,ACTA2,DACT2,TRIM22,MYL9,UPK3A,PLN,CNN1,COL4A1,COL6A3,COL8A1,COL12A1,MRAS,FN1,TNC,CCDC80,NLRP2,CRMP1,SMTN,POSTN,IGFBP7,ISG15,NSG1,GLIPR2,RAB15,CCN2,IFI6,DKK2,HTRA1,ADAM19,INHBA,DCX,BGN,SULT1E1,CCDC3,ZNF558,TAGLN,KRT7,DPYSL3,CALD1,UACA,LCP1,INA,LTBP2,LY6E,PHLDB2
Coexpression	MM16097	MA_RAT_AGING_DN	M2:CGP: Chemical and Genetic Perturbations	1.855e-11	1.73e-07	1.88e-09	1.827e-08	20	170	TPM1,TPM2,ACTA2,ACTG2,MYL9,FHL1,CNN1,COL4A1,FN1,ID3,SOSTDC1,CCDC80,RND3,POSTN,IGFBP7,MYH11,HTRA1,BGN,TUBA1A,TAGLN
Coexpression Atlas	Facebase_RNAseq_ratio_e10.5_MandibularArch_vs_MaxillaryArch_2500_K5	FacebaseRNAseq_ratio_e10.5_MandibularArch_vs_MaxillaryArch_top-relative-expression-ranked_2500_k-means-cluster#5	FaceBase_RNAseq	1.994e-11	7.817e-08	4.319e-10	3.823e-09	44	658	EPHB2,TTYH1,MAP2,MEIS2,KIAA1549L,CSRNP3,SEMA5B,CPT1C,PCDH10,LTBP4,MGAT5B,IGLON5,CAP2,COL8A1,SFRP1,SEPTIN5,POGK,WNT7A,DPYSL4,APLP1,ZNF43,SCMH1,NCAM2,TUBB2B,FJX1,BRINP1,DCX,CYRIA,TUBA1A,SYT11,ASTN2,SGCE,WNK2,SHANK1,DDR1,DTNA,MAMLD1,TAMALIN,PIANP,GPR137C,TLE4,PAK3,SENP7,EPHA3
Coexpression Atlas	gudmap_dev gonad_e12.5_M_InterstitTestis_Sma_k4_1000	dev gonad_e12.5_M_InterstitTestis_Sma_k-means-cluster#4_top-relative-expression-ranked_1000	Gudmap Mouse ST 1.0	2.031e-11	7.961e-08	4.374e-10	3.872e-09	23	191	ACTA2,HOXD11,LTBP4,COL6A3,OLFML2B,SOSTDC1,SMTN,LRRN3,DKK1,IGFBP7,GLIPR2,PDE5A,ATP2B4,INHBA,BGN,ARHGEF9,ZEB1,ADAMTS5,EDNRA,TGFB2,HMCN1,EPHA3,ARMH4
Coexpression Atlas	gudmap_developingKidney_e15.5_Peripheral blastema_1000	DevelopingKidney_e15.5_Peripheral blastema_emap-27731_top-relative-expression-ranked_1000	Gudmap Mouse MOE430.2	2.121e-11	8.313e-08	4.543e-10	4.021e-09	50	819	VGLL3,EYA4,ASIC2,PENK,E2F7,MCM5,ADCY2,ABCA9,MEIS2,FBN2,CSRNP3,ANLN,UBE2E3,FOXC1,FOXC2,COL8A1,LRP12,SFRP1,COL12A1,CRABP2,CDC42EP3,AKAP12,POSTN,LRRN3,DKK1,NSG1,DOCK11,GAS2,PDE10A,SULT1E1,COL24A1,OLFML1,NTM,CCDC3,ARHGEF9,ZBTB21,NOVA1,CACNA1C,ZEB1,GAL3ST4,ADAMTS5,LPAR1,SDAD1,EDNRA,SEMA3D,HMCN1,EGR2,SERTAD4,CDH2,ARHGAP19
Coexpression	M45712	HE_LIM_SUN_FETAL_LUNG_C1_PULMONARY_NEUROENDOCRINE_CELL	C8: Cell Type Signature	2.186e-11	2.038e-07	2.191e-09	2.129e-08	23	233	ADCY1,REEP2,ADCY2,TUBB3,SLITRK6,MMP11,TRIM46,APLP1,CRMP1,DLL3,MIAT,TCEAL7,DCX,SYT11,STMN3,SYT1,KRT7,DPYSL3,DTNA,CBFA2T3,RGS4,INA,TPBG
Coexpression	MM1052	CHEN_METABOLIC_SYNDROM_NETWORK	M2:CGP: Chemical and Genetic Perturbations	2.318e-11	2.161e-07	2.299e-09	2.234e-08	59	1316	IGSF8,TRAF5,RHOJ,TRPC4,MCM5,RFTN2,PICALM,TUBB4A,CLCN5,EVA1A,PKM,FHL1,FKBP1A,COL4A1,COL6A3,COL8A1,LRP12,TNC,TUBB,WT1,POU3F1,CCDC80,POSTN,ARHGDIB,RAB15,IL17RD,FAM131B,MYADM,HTRA1,ADAM19,DOCK11,GDF10,BGN,TUBA1A,RBMS3,SULF1,CCDC3,MAFB,ST8SIA4,WASF1,DNMT3A,SHANK1,GLIPR1,DPYSL3,ZFP90,PLXDC1,LCP1,ZNF503,SLC7A8,THBS2,LMNA,FRMD6,EGR2,TLE4,LTBP2,TNFAIP2,UBASH3B,PLEKHO1,EPB41
Coexpression Atlas	gudmap_kidney_adult_RenCorpuscGlomer_1000	kidney_adult_RenCorpuscGlomer_top-relative-expression-ranked_1000	Gudmap Mouse MOE430.2	2.49e-11	9.761e-08	5.305e-10	4.696e-09	52	878	CTTNBP2,RAMP2,TRPC4,MCC,ADCY1,PICALM,ABCA9,EHD3,ARHGAP31,PLS3,FOXC1,FOXC2,RGS5,PODXL,APLP1,CCDC80,SP110,IFIT1,CDC42EP3,CRIP2,POSTN,ARHGDIB,TAF9B,IGFBP7,CYYR1,PDE5A,CCN2,PRKG1,SNCG,DKK2,HTRA1,ARHGAP24,GATA3,GBP1,SYNC,AIF1L,SLFN5,BGN,CYRIA,TSPAN17,SULF1,MAFB,KRT7,CALD1,UACA,NT5E,ADAMTS5,SLC7A8,TJP1,TNFAIP2,LY6E,EPHA3
Coexpression	M40151	DESCARTES_FETAL_ADRENAL_STROMAL_CELLS	C8: Cell Type Signature	2.568e-11	2.394e-07	2.508e-09	2.437e-08	19	154	TRPC4,ACTA2,ACTG2,COL6A3,COL12A1,WT1,CCDC80,POSTN,OSR1,DKK2,MYH11,GAS2,SULT1E1,OLFML1,SULF1,TAGLN,EDNRA,TBX18,THBS2
Coexpression	M2356	KOINUMA_TARGETS_OF_SMAD2_OR_SMAD3	C2:CGP: Chemical and Genetic Perturbations	2.582e-11	2.407e-07	2.508e-09	2.437e-08	45	842	CNTNAP3,PICALM,HOXD11,ANLN,PKM,AMOTL2,FST,FKBP1A,PLS3,AGAP3,COL12A1,STARD4,TNC,TUBB,CRABP2,CDC42EP3,ARHGDIB,UHRF1,ITPRIP,CCN2,DKK3,SERPINB7,CCP110,ADAM19,SAMD9,GATA3,DENND2B,PTHLH,OLFML2A,GPC1,KRT7,CALD1,NT5E,ACTR3B,TFAP2A,LPAR1,RGS12,SLC7A8,FRMD6,TJP1,SERTAD4,SLC7A5,LTBP2,SMAD1,PHLDB2
GO: Biological Process	GO:0048646	anatomical structure formation involved in morphogenesis		2.704e-11	1.549e-07	7.374e-09	6.806e-08	86	1910	TPM1,EPHB2,EPHB6,RAMP2,RHOJ,CADM4,MCAM,E2F7,HLX,FZD1,FBN2,MYL9,HOXD11,PKM,ALDH1A3,AMOTL2,FST,PLN,FKBP1A,CNTN1,FOXC1,FOXC2,COL4A1,JCAD,COL8A1,TEAD2,SFRP1,COL12A1,FN1,PODXL,WNT7A,WT1,CCDC80,STIL,SCUBE2,NKD1,DKK1,IGFBP7,DLL3,OSR1,CCN2,DCBLD2,ATP2B4,MYH11,HTRA1,ARHGAP24,INHBA,GATA2,GATA3,PARD6G,FJX1,DCX,PTHLH,TUBA1A,SULF1,NFIB,NECTIN1,ARHGEF9,MAFB,GPC1,SLC12A6,SASH1,CALD1,PLXDC1,DUSP4,ADAMTS5,TFAP2A,…
Coexpression Atlas	PCBC_EB_1000	Progenitor-Cell-Biology-Consortium_EmbryoidBody_top-relative-expression-ranked_1000	PCBC	2.773e-11	1.087e-07	5.877e-10	5.202e-09	56	994	BACH2,PENK,ACTA2,DACT2,ACTG2,RFTN2,SBK1,SEMA5B,HOXD11,UPK3A,SLITRK6,PLN,IGLON5,PDZD4,COL6A3,COL9A1,FN1,WNT7A,SOSTDC1,POU3F1,MOXD1,NKD1,DLL3,OSR1,RASL11B,MIAT,DKK2,H19,GAS1,BRINP1,GDF10,DCX,SULT1E1,NEFL,ST6GAL2,ANOS1,SULF1,NRK,SYT1,DLX2,NKAIN1,NNAT,TAGLN,KRT7,NIPAL4,PCDHGB6,TFAP2A,RGS4,TGFB2,PLEKHG4B,SEMA3D,PWWP3B,GREM1,LY6H,EPHA3,RASD2
Coexpression	MM1070	GOBERT_OLIGODENDROCYTE_DIFFERENTIATION_DN	M2:CGP: Chemical and Genetic Perturbations	3.005e-11	2.801e-07	2.888e-09	2.806e-08	53	1113	TTYH1,RFTN2,KATNAL1,NREP,TUBB3,TUBB4A,UBE2H,SEMA5B,RAD54B,TBC1D14,AMOTL2,SDC1,IGLON5,MEX3B,JCAD,COL6A3,COL9A1,SESN3,CDC42EP3,LRRN3,NKD1,TAF9B,IGFBP7,ZKSCAN1,HTRA1,MYLK,PARD6G,NCAM2,SYT11,TMCC2,SYT1,NKAIN1,KIF3C,KAZN,WASF1,DNMT3A,EHBP1,DDR1,DPYSL3,SASH1,DTNA,SAE1,TAMALIN,LPAR1,GSK3B,NARF,MSANTD3-TMEFF1,SOX21,PAK3,UBASH3B,PSPC1,PHLDB2,TPBG
Coexpression Atlas	Facebase_RNAseq_e9.5_Facial Mesenchyne_2500_K5	FacebaseRNAseq_e9.5_Facial Mesenchyne_top-relative-expression-ranked_2500_k-means-cluster#5	FaceBase_RNAseq	3.475e-11	1.362e-07	7.323e-10	6.482e-09	46	722	EPHB2,TTYH1,MAP2,MEIS2,KIAA1549L,UBE2H,CSRNP3,SEMA5B,CPT1C,PCDH10,LTBP4,MGAT5B,IGLON5,COL8A1,SFRP1,STARD4,POGK,WNT7A,DPYSL4,APLP1,ZNF43,SCMH1,NCAM2,TUBB2B,BRINP1,DCX,CYRIA,TUBA1A,SYT11,SULF1,ZNF558,ASTN2,SGCE,NNAT,WNK2,SHANK1,DDR1,DTNA,MAMLD1,TAMALIN,PIANP,GPR137C,TLE4,PAK3,SENP7,EPHA3
Coexpression Atlas	gudmap_developingLowerUrinaryTract_P2_bladder detrusor (LCM)_500_k3	DevelopingLowerUrinaryTract_P2_bladder detrusor (LCM)_emap-30376_k-means-cluster#3_top-relative-expression-ranked_500	Gudmap Mouse MOE430.2	3.952e-11	1.549e-07	8.271e-10	7.321e-09	18	115	TPM1,TPM2,ACTA2,ACTG2,MYL9,CNN1,CDC42EP3,SMTN,SCUBE2,MYH11,MYLK,KCNMB1,TAGLN,GLIPR1,NIPAL4,CALD1,NT5E,THBS2
Coexpression Atlas	gudmap_kidney single cell_e11.5_MetanephMesench_Scamp_1000	kidney single cell_e11.5_MetanephMesench_StemCellamp_top-relative-expression-ranked_1000	Gudmap Mouse MOE430.2	3.967e-11	1.555e-07	8.271e-10	7.321e-09	43	646	TPM2,MCM5,RFTN2,NREP,MEIS2,FABP5,TUBB4A,MEX3A,HOXD11,CAP2,RBM38,FOXC1,FOXC2,TEAD2,COL9A1,TUBB,ID3,DPYSL4,CRABP2,POSTN,UHRF1,H19,MYADM,DOCK11,MARCKSL1,MEIS3,MELK,SEPTIN6,SULF1,ARHGEF9,KCNMB4,NNAT,PCBP4,CTXN1,TAF1C,STMN1,CDCA8,GSK3B,HMCN1,CDK2AP1,PWWP3B,PLEKHO1,TPBG
Coexpression	M2369	GOBERT_OLIGODENDROCYTE_DIFFERENTIATION_DN	C2:CGP: Chemical and Genetic Perturbations	4.115e-11	3.836e-07	3.886e-09	3.776e-08	52	1088	TTYH1,RFTN2,KATNAL1,NREP,TUBB3,TUBB4A,UBE2H,SEMA5B,RAD54B,TBC1D14,AMOTL2,SDC1,IGLON5,MEX3B,JCAD,COL6A3,COL9A1,SESN3,CDC42EP3,LRRN3,NKD1,TAF9B,IGFBP7,ZKSCAN1,HTRA1,MYLK,PARD6G,NCAM2,SYT11,TMCC2,SYT1,NKAIN1,KIF3C,KAZN,WASF1,DNMT3A,EHBP1,DDR1,DPYSL3,SASH1,DTNA,SAE1,TAMALIN,LPAR1,GSK3B,NARF,SOX21,PAK3,UBASH3B,PSPC1,PHLDB2,TPBG
Coexpression	M15193	GRUETZMANN_PANCREATIC_CANCER_UP	C2:CGP: Chemical and Genetic Perturbations	4.166e-11	3.884e-07	3.886e-09	3.776e-08	28	359	TRIM29,NREP,FABP5,MYL9,PKM,MMP11,PLN,SDC1,CNN1,FN1,TUBB,CRABP2,CRIP2,AKAP12,POSTN,MYLK,GBP1,MELK,TUBA1A,IFI44L,GPC1,DPYSL3,CALD1,STMN1,LCP1,THBS2,PSME3,R3HDM1
Coexpression	M45746	HE_LIM_SUN_FETAL_LUNG_C3_ARTERIAL_ENDOTHELIAL_CELL	C8: Cell Type Signature	4.169e-11	3.886e-07	3.886e-09	3.776e-08	25	286	PDE4D,MCC,LTBP4,SEMA3F,APLP1,CDC42EP3,NSG1,IFI6,DKK2,AIF1L,PDE10A,SULT1E1,NUAK1,SYT11,SULF1,SYT1,IFI44L,NOVA1,DUSP4,MAMLD1,TGFB2,HMCN1,HSD17B14,TOX2,SENP7
Coexpression Atlas	GSM777063_500	Stromal Cells, LEC.SLN, gp38+ CD31+, Lymph Node, avg-4	Immgen.org, GSE15907	4.364e-11	1.711e-07	9.052e-10	8.012e-09	35	450	RAMP2,RHOJ,MEIS2,ARHGAP29,LTBP4,PLS3,FOXC2,COL4A1,SEMA3F,JCAD,COL12A1,FN1,TNC,PODXL,CRIP2,SMTN,POSTN,IGFBP7,PARD6G,MARCKSL1,GDF10,BGN,OLFML2A,FBXL7,NFIB,CCDC3,ADAMTS5,RGS4,MSRB3,SEMA3D,HMCN1,TJP1,LTBP2,SMAD1,PHLDB2
Coexpression Atlas	gudmap_developingKidney_e15.5_Podocyte cells_1000	DevelopingKidney_e15.5_Podocyte cells_emap-27915_top-relative-expression-ranked_1000	Gudmap Mouse MOE430.2	4.406e-11	1.727e-07	9.091e-10	8.047e-09	50	836	EYA4,PENK,ACTA2,E2F7,ACTG2,TENM2,ADCY1,ABCA9,FZD1,CSRNP3,EVA1A,UBE2E3,CNTN1,FOXC1,FOXC2,COL9A1,COL13A1,PODXL,WT1,POU3F1,AKAP12,DKK1,CYYR1,RASL11B,PDE5A,IL17RD,DKK3,MYH11,ARHGAP24,MYLK,GBP1,C11orf87,AIF1L,GDF10,CYRIA,CCDC3,MAFB,NT5E,DTNA,ZBTB8A,GAL3ST4,LCP1,NCS1,TTLL7,TBX18,THBS2,TNFAIP2,SENP7,TPBG,EPHA3
Coexpression Atlas	DevelopingLowerUrinaryTract_e14.5_ urogenital sinus_emap-6689_500	DevelopingLowerUrinaryTract_e14.5_ urogenital sinus_emap-6689_top-relative-expression-ranked_500	Gudmap Mouse MOE430.2	4.44e-11	1.74e-07	9.112e-10	8.066e-09	34	427	EYA4,MAP2,CSMD3,TENM2,TUBB3,CSRNP3,ALDH1A3,SLITRK6,PCDH10,CNTN1,COL8A1,MIAT,DKK2,SPOCK1,INHBA,C11orf87,NCAM2,DCX,NEFL,ST6GAL2,SYT11,SULF1,STMN3,NRK,GRIN3A,ST8SIA4,NOVA1,ADAMTS5,RGS4,MSRB3,TGFB2,INA,RBFOX2,EPHA3
Coexpression Atlas	Facebase_RNAseq_e10.5_Mandibular Arch_1000	FacebaseRNAseq_e10.5_Mandibular Arch_top-relative-expression-ranked_1000	FaceBase_RNAseq	4.548e-11	1.783e-07	9.285e-10	8.218e-09	55	978	IGSF8,EYA4,TENM2,ADCY2,MEIS2,KIAA1549L,SEMA5B,SLITRK6,MMP11,LTBP4,COL6A3,COL8A1,COL9A1,CHODL,RGS5,TNC,OLFML2B,SOSTDC1,DPYSL4,CCDC80,STIL,SP110,POSTN,IGFBP7,ZNF43,OSR1,LIMCH1,ATP2B4,DKK2,HTRA1,INHBA,GATA3,P4HA3,C11orf87,NCAM2,MARCKSL1,DCX,COL24A1,OLFML1,NFIB,NRK,CCDC3,DLX2,SHANK1,CACNA1C,KRT7,DTNA,MAMLD1,SEMA3D,THBS2,EGR2,PWWP3B,EPB41,SENP7,EPHA3
GO: Biological Process	GO:0060429	epithelium development		4.792e-11	2.744e-07	1.247e-08	1.151e-07	88	1998	EPHB2,CDKN2A,EYA4,PDE4D,ACTA2,DACT2,MCAM,MCC,E2F7,MEIS2,FZD1,FBN2,HOXD11,ANLN,UPK3A,ALDH1A3,SLITRK6,AMOTL2,FST,SDC1,MRTFA,FOXC1,FOXC2,COL4A1,TEAD2,SFRP1,FN1,TNC,PODXL,WNT7A,TUBB,WT1,ID3,SOSTDC1,POU3F1,CCDC80,STIL,AKAP12,SCUBE2,NKD1,DKK1,IGFBP7,CELF1,DLL3,OSR1,CTNS,MYCL,MYADM,MYH11,ARHGAP24,INHBA,GAS1,GATA2,GATA3,PARD6G,MARCKSL1,PTHLH,SULF1,NFIB,ASTN2,MAFB,KAZN,TAGLN,TMEM231,CACNA1C,DDR1,KRT7,ZEB1…
Coexpression Atlas	gudmap_dev gonad_e11.5_F_GonadVasMes_Flk_k4_500	dev gonad_e11.5_F_GonadVasMes_Flk_k-means-cluster#4_top-relative-expression-ranked_500	Gudmap Mouse ST 1.0	5.131e-11	2.011e-07	1.042e-09	9.224e-09	20	148	MEIS2,FBN2,MEX3A,SLITRK6,PLS3,CNN1,RGS5,CCDC80,CRABP2,RND3,POSTN,NKD1,UHRF1,PRKG1,RBMS3,NRK,ZNF558,NNAT,EGR2,PBX3
Coexpression Atlas	Facebase_RNAseq_e8.5_Paraxial Mesoderm_2500_K4	FacebaseRNAseq_e8.5_Paraxial Mesoderm_top-relative-expression-ranked_2500_k-means-cluster#4	FaceBase_RNAseq	5.258e-11	2.061e-07	1.062e-09	9.404e-09	46	731	PDE4D,BACH2,PLPPR3,RFTN2,FZD1,SLITRK6,MARCHF4,COL9A2,RGS5,OLFML2B,ZFP14,SP110,ARHGDIB,MOXD1,ZKSCAN1,NSG1,OSR1,RASL11B,ATP2B4,DKK3,DKK2,ARHGAP24,BGN,COL24A1,ST6GAL2,OLFML1,NFIB,NRK,CCDC3,ARHGEF9,EXOC6B,MAFB,KAZN,GPC2,GRIN3A,DNMT3A,EHBP1,CACNA1C,KRT7,ZFP90,MSRB3,THBS2,SERTAD4,PWWP3B,UBASH3B,HSD17B14
Coexpression	M11504	TOMLINS_PROSTATE_CANCER_DN	C2:CGP: Chemical and Genetic Perturbations	5.465e-11	5.095e-07	5.044e-09	4.902e-08	11	40	TPM2,MEIS2,FHL1,CNN1,AKAP12,SMTN,ATP2B4,MYLK,GAS1,DENND2B,SGCE
GO: Biological Process	GO:0035239	tube morphogenesis		5.526e-11	3.164e-07	1.376e-08	1.27e-07	72	1483	EPHB2,EPHB6,RAMP2,RHOJ,MCAM,E2F7,HLX,MEIS2,FZD1,FBN2,HOXD11,PKM,AMOTL2,FST,FOXC1,FOXC2,COL4A1,JCAD,COL8A1,TEAD2,SFRP1,FN1,TNC,SGCD,PODXL,WNT7A,WT1,SOSTDC1,STIL,NKD1,IGFBP7,CELF1,OSR1,CCN2,CTNS,DCBLD2,ATP2B4,MYH11,ARHGAP24,MYLK,GATA2,GATA3,PARD6G,MARCKSL1,PTHLH,SULF1,NFIB,ARHGEF9,SLC12A6,CACNA1C,DDR1,ZEB1,SASH1,CALD1,PLXDC1,CAMK2G,TFAP2A,LPAR1,GSK3B,EDNRA,NCS1,TGFB2,THBS2,IFT52,TJP1,CCBE1,VASH2,PS…
Coexpression Atlas	gudmap_dev gonad_e12.5_F_VasAssocMesStromOvary_Sma_500	dev gonad_e12.5_F_VasAssocMesStromOvary_Sma_top-relative-expression-ranked_500	Gudmap Mouse ST 1.0	5.607e-11	2.198e-07	1.117e-09	9.887e-09	32	385	MAP2,ACTA2,FBN2,MYL9,ARHGAP29,FST,CNN1,SFRP1,COL12A1,RGS5,PODXL,WT1,CCDC80,CRABP2,POSTN,NKD1,NSG1,PRKG1,MYH11,PARD6G,DENND2B,OLFML1,SULF1,NRK,MAFB,KRT7,CALD1,PLXDC1,EDNRA,HMCN1,EGR2,CDH12
Coexpression Atlas	gudmap_developingGonad_e11.5_testes_k1_1000	DevelopingGonad_e11.5_testes_emap-3226_k-means-cluster#1_top-relative-expression-ranked_1000	Gudmap Mouse MOE430.2	5.613e-11	2.2e-07	1.117e-09	9.887e-09	16	89	BACH2,TUBB3,COL9A1,DPYSL4,APLP1,CRABP2,CRMP1,DLL3,TUBB2B,FJX1,NEFL,SYT11,PCBP4,DPYSL3,GAL3ST4,INA
Coexpression Atlas	DevelopingLowerUrinaryTract_e14.5_ urethra_emap-30902_k5_1000	DevelopingLowerUrinaryTract_e14.5_ urethra_emap-30902_k-means-cluster#5_top-relative-expression-ranked_1000	Gudmap Mouse MOE430.2	5.613e-11	2.2e-07	1.117e-09	9.887e-09	16	89	TRAF5,ACTA2,ACTG2,TENM2,MYL9,EVA1A,CNN1,CAP2,PDE5A,DKK3,MYH11,MYLK,CYRIA,NRK,DPYSL3,CALD1
Coexpression Atlas	gudmap_developingKidney_e11.5_metaneph mesench_500	DevelopingKidney_e11.5_metaneph mesench_emap-3843_top-relative-expression-ranked_500	Gudmap Mouse MOE430.2	5.712e-11	2.239e-07	1.131e-09	1.001e-08	34	431	TPM2,EYA4,E2F7,MCM5,MEIS2,CSRNP3,MAP4K4,FOXC1,FOXC2,COL9A1,RGS5,DPYSL4,POU3F1,CRABP2,CRMP1,MOXD1,DKK1,SNCG,C11orf87,BRINP1,DCX,NEFL,KCNMB4,NKAIN1,GRIN3A,PCBP4,DNMT3A,CTXN1,GAL3ST4,TBX18,EGR2,PSME3,CDH2,TPBG
Coexpression	M38982	MEBARKI_HCC_PROGENITOR_WNT_UP	C2:CGP: Chemical and Genetic Perturbations	6.194e-11	5.774e-07	5.66e-09	5.501e-08	21	202	EPHB2,MEX3B,MRTFA,FN1,CCDC80,ARHGDIB,MOXD1,DCBLD2,MYADM,ADAM19,SPOCK1,GBP1,ST6GAL2,CCDC3,GLIPR1,DPYSL3,LCP1,TGFB2,THBS2,HMCN1,SLC7A5
Coexpression Atlas	smooth muscle	smooth muscle	Human Protein Atlas	6.696e-11	2.625e-07	1.313e-09	1.162e-08	16	90	ASIC2,TRPC4,ACTG2,CNN1,COL6A3,TNC,WT1,MOXD1,MYH11,P4HA3,SYNC,SULF1,KCNMB1,CACNA1C,DPYSL3,GREM1
Coexpression Atlas	Facebase_RNAseq_e9.5_Olfactory Placode_2500_K4	FacebaseRNAseq_e9.5_Olfactory Placode_top-relative-expression-ranked_2500_k-means-cluster#4	FaceBase_RNAseq	6.699e-11	2.626e-07	1.313e-09	1.162e-08	44	683	EPHB2,TTYH1,MAP2,MEIS2,TUBB3,KIAA1549L,CSRNP3,SEMA5B,CPT1C,FHL1,PCDH10,LTBP4,MGAT5B,IGLON5,COL8A1,POGK,WNT7A,DPYSL4,APLP1,ZNF43,NCAM2,TUBB2B,BRINP1,DCX,CYRIA,TUBA1A,SYT11,ASTN2,SGCE,DLX2,NNAT,WNK2,SHANK1,DTNA,MAMLD1,GAL3ST4,TAMALIN,SOX21,GPR137C,TLE4,PAK3,TOX2,SENP7,EPHA3
Coexpression	M39279	DURANTE_ADULT_OLFACTORY_NEUROEPITHELIUM_VASCULAR_SMOOTH_MUSCLE_CELLS	C8: Cell Type Signature	6.809e-11	6.347e-07	6.155e-09	5.981e-08	15	93	TPM1,TPM2,ACTA2,MCAM,ACTG2,MYL9,FHL1,PLN,CNN1,RGS5,IGFBP7,MYH11,MYLK,TAGLN,CALD1
Coexpression	M2309	AZARE_NEOPLASTIC_TRANSFORMATION_BY_STAT3_UP	C2:CGP: Chemical and Genetic Perturbations	6.867e-11	6.401e-07	6.155e-09	5.981e-08	17	126	FST,SFRP1,FN1,TNC,ARHGDIB,NSG1,IFI6,DCBLD2,SNRPN,PRSS2,SPOCK1,NEFL,RAB6A,DPYSL3,CALD1,DUSP4,GREM1
Coexpression	M41676	TRAVAGLINI_LUNG_ALVEOLAR_FIBROBLAST_CELL	C8: Cell Type Signature	7.793e-11	7.264e-07	6.918e-09	6.723e-08	19	164	FHL1,LTBP4,COL6A3,COL8A1,COL13A1,FN1,SGCD,LRRN3,MOXD1,CCN2,LIMCH1,DKK3,MYADM,NCAM2,GDF10,NUAK1,ADAMTS8,HMCN1,CCBE1
Coexpression Atlas	gudmap_developingLowerUrinaryTract_e14.5_ Genital tubercle_500	DevelopingLowerUrinaryTract_e14.5_ Genital tubercle_emap-6706_top-relative-expression-ranked_500	Gudmap Mouse MOE430.2	7.821e-11	3.066e-07	1.525e-09	1.35e-08	32	390	VGLL3,BACH2,RFTN2,TENM2,MEIS2,CSRNP3,SLITRK6,PCDH10,COL8A1,WNT7A,SOSTDC1,RND3,DKK1,LYPD3,GIGYF2,LIMCH1,DKK3,DKK2,SPOCK1,INHBA,COL24A1,ST6GAL2,SULF1,NTM,DLX2,DPYSL3,TFAP2A,EDNRA,MSRB3,TGFB2,FRMD6,RBFOX2
Coexpression Atlas	Facebase_RNAseq_e8.5_Non-Floor Plate Neural Epithelium_2500_K1	FacebaseRNAseq_e8.5_Non-Floor Plate Neural Epithelium_top-relative-expression-ranked_2500_k-means-cluster#1	FaceBase_RNAseq	7.892e-11	3.094e-07	1.532e-09	1.356e-08	51	878	PDE4D,ACTG2,RFTN2,ADCY2,FZD1,SLITRK6,MARCHF4,KIF17,COL6A3,COL9A2,MRAS,CHODL,TNC,SGCD,OLFML2B,ZFP14,SP110,ARHGDIB,MOXD1,IGFBP7,DLL3,OSR1,ATP2B4,DKK3,DKK2,INHBA,GAS2,P4HA3,C11orf87,LAMP5,SLFN5,PDE10A,BGN,COL24A1,FBXL7,OLFML1,NRK,CCDC3,ARHGEF9,EXOC6B,MAFB,KAZN,GPC2,GRIN3A,CACNA1C,KRT7,NT5E,THBS2,LMNA,LTBP2,HSD17B14
Coexpression Atlas	gudmap_developingKidney_e14.5 whole kidney - Wnt4 KO_500_k1	DevelopingKidney_e14.5 whole kidney - Wnt4 KO_emap-6674_k-means-cluster#1_top-relative-expression-ranked_500	Gudmap Mouse MOE430.2	7.968e-11	3.123e-07	1.539e-09	1.362e-08	16	91	TPM1,TPM2,ADCY2,MEIS2,COL6A3,NKD1,PDE5A,GATA2,SULF1,NFIB,SYT1,ST8SIA4,EHBP1,CALD1,TGFB2,TBX18
Coexpression Atlas	Facebase_RNAseq_e10.5_Mandibular Arch_2500_K5	FacebaseRNAseq_e10.5_Mandibular Arch_top-relative-expression-ranked_2500_k-means-cluster#5	FaceBase_RNAseq	8.47e-11	3.32e-07	1.628e-09	1.441e-08	44	688	EPHB2,TTYH1,MAP2,MEIS2,KIAA1549L,UBE2H,CSRNP3,SEMA5B,CPT1C,PCDH10,LTBP4,MGAT5B,IGLON5,COL8A1,SFRP1,STARD4,POGK,WNT7A,DPYSL4,APLP1,ZNF43,SCMH1,NSG1,NCAM2,TUBB2B,BRINP1,DCX,CYRIA,TUBA1A,SYT11,ASTN2,SGCE,DLX2,WNK2,SHANK1,DTNA,MAMLD1,TAMALIN,PIANP,GPR137C,TLE4,PAK3,SENP7,EPHA3
Coexpression	M41080	HARALAMBIEVA_PBMC_M_M_R_II_AGE_11_22YO_VACCINATED_VS_UNVACCINATED_7YR_UP	C7:VAX: HIPC Vaccine Response	8.49e-11	7.914e-07	7.466e-09	7.255e-08	48	973	CDKN2A,MAP2,ACTA2,E2F7,HLX,HMMR,TRIM22,SBK1,TUBB3,PGAP1,AMOTL2,PLS3,FOXC1,LRP12,CHODL,CCDC80,SP110,IFIT1,MOXD1,ISG15,CCN2,LIMCH1,IFI6,ADAM19,SAMD9,INHBA,GBP1,LAMP5,TUBB2B,MEIS3,MELK,COL24A1,BUB1,KCNMB1,IFI44L,GRIN3A,ST8SIA4,WNK2,NIPAL4,SASH1,CALD1,MAMLD1,LPAR1,EGR2,TJP1,SLC7A5,GREM1,LY6E
Coexpression	M15103	DOUGLAS_BMI1_TARGETS_UP	C2:CGP: Chemical and Genetic Perturbations	8.645e-11	8.059e-07	7.532e-09	7.319e-08	35	563	TPM1,TPM2,MCAM,MRPS35,CNOT6,FZD1,TUBB4A,ALDH1A3,SDC1,RBM38,AGAP3,COL4A1,KLF11,COL13A1,FN1,SEPTIN5,PODXL,CLDND1,APLP1,CRMP1,RAB15,DCBLD2,DKK3,DKK2,TUBB2B,BGN,CYRIA,CCDC3,PCBP4,WASF1,CTXN1,SHANK1,RGS4,INA,CDK2AP1
Coexpression Atlas	BM Top 100 - cervix	BM Top 100 - cervix	Body Map	8.793e-11	3.447e-07	1.681e-09	1.488e-08	14	66	ACTA2,ACTG2,MYL9,PLN,CNN1,COL6A3,SFRP1,COL12A1,CCDC80,H19,MYH11,TAGLN,EDNRA,GREM1
Coexpression Atlas	Facebase_RNAseq_e9.5_Facial Mesenchyne_500	FacebaseRNAseq_e9.5_Facial Mesenchyne_top-relative-expression-ranked_500	FaceBase_RNAseq	8.996e-11	3.527e-07	1.712e-09	1.515e-08	36	486	IGSF8,ADCY2,SLITRK6,MMP11,LTBP4,RBM38,FOXC1,COL6A3,COL8A1,CHODL,RGS5,TNC,SOSTDC1,CCDC80,CRABP2,POSTN,IGFBP7,OSR1,LIMCH1,IL17RD,DKK2,INHBA,P4HA3,NCAM2,LAMP5,COL24A1,NFIB,NRK,CCDC3,NNAT,PCBP4,TFAP2A,SEMA3D,THBS2,SENP7,EPHA3
Coexpression Atlas	PCBC_ratio_ECTO blastocyst_vs_ECTO UCB CD34+Z_cfr-2X-p05	ECTO blastocyst_vs_ECTO UCB CD34+Z-Confounder_removed-fold2.0_adjp0.05	PCBC_AltAnalyze	9.237e-11	3.621e-07	1.749e-09	1.548e-08	27	284	MAP2,ACTA2,TRIM22,FBN2,CLCN5,FST,PCDH10,CNN1,FN1,TNC,ID3,CRABP2,NLRP2,LRRN3,DKK1,CYYR1,RASL11B,RAB15,ADAM19,DOCK11,GATA3,FJX1,ST6GAL2,MAFB,TAGLN,EDNRA,CCBE1
GO: Biological Process	GO:0007389	pattern specification process		9.3e-11	5.325e-07	2.219e-08	2.048e-07	52	900	MCAM,ADCY2,MEIS2,HOXD11,PGAP1,AMOTL2,FST,FOXC1,FOXC2,SEMA3F,SFRP1,FN1,SGCD,WNT7A,WT1,SOSTDC1,CCDC80,STIL,SCUBE2,NKD1,DKK1,CELF1,SCMH1,DLL3,OSR1,TTC17,IL17RD,GAS1,MEIS3,SEPTIN6,SULF1,MAFB,DLX2,CACNA1C,ZEB1,CALD1,TSC22D3,CAMK2G,TFAP2A,GSK3B,EDNRA,TBX18,IFT52,SOX21,EGR2,TLL2,GREM1,PBX3,CDH2,SMAD1,TPBG,EPHA3
Coexpression Atlas	PCBC_ratio_Bronchial Smooth Muscle_vs_SC_cfr-2X-p05	Bronchial Smooth Muscle_vs_Pluripotent Stem Cells-Confounder_removed-fold2.0_adjp0.05	PCBC_AltAnalyze	9.335e-11	3.659e-07	1.759e-09	1.557e-08	80	1778	EPHB2,TPM2,CDKN2A,PENK,ACTA2,FAM89B,PICALM,EHD3,FZD1,ANLN,EVA1A,PKM,ARHGAP29,FST,PCDH10,MAP4K4,LTBP4,UBE2E3,SDC1,FOXC1,TOM1L2,COL6A3,COL8A1,COL12A1,COL13A1,FN1,TNC,OLFML2B,CCDC80,SP110,CDC42EP3,CRIP2,ARL4D,SMTN,WDR47,RND3,POSTN,MOXD1,DKK1,IGFBP7,OSR1,ITPRIP,CCN2,SNCG,DCBLD2,ATP2B4,DKK3,DKK2,PRSS2,MYADM,HTRA1,MYLK,SPOCK1,FJX1,SLFN5,BGN,SYT11,SULF1,NTM,SGCE,PCBP4,GPC1,GLIPR1,EHBP1,SLC12A6,UACA,NT5E…
Coexpression Atlas	ratio_DE_vs_SC_500_K2	ratio_induced-DefinitiveEndoderm_vs_StemCell_top-relative-expression-ranked_500_k-means-cluster#2	PCBC	9.459e-11	3.708e-07	1.774e-09	1.57e-08	21	170	HLX,TENM2,ARHGAP29,SLITRK6,AMOTL2,FOXC1,TOM1L2,JCAD,FN1,TNC,DKK1,DKK3,ARHGAP24,PTHLH,OLFML1,RBMS3,CCDC3,ADAMTS5,ZNF503,SERTAD4,GREM1
Coexpression Atlas	JC_fibro_500_K3	JC_fibro_top-relative-expression-ranked_500_k-means-cluster#3	PCBC	9.57e-11	3.751e-07	1.786e-09	1.581e-08	23	206	CPA4,ACTA2,EVA1A,COL6A3,COL8A1,COL12A1,FN1,SGCD,CCDC80,MOXD1,CCN2,DKK3,MYLK,GAS1,P4HA3,BGN,IFI44L,ADAMTS5,LPAR1,THBS2,FRMD6,EGR2,GREM1
Coexpression	M10371	BENPORATH_ES_WITH_H3K27ME3	C2:CGP: Chemical and Genetic Perturbations	9.941e-11	9.267e-07	8.58e-09	8.338e-08	52	1115	TTYH1,EYA4,CADM4,PENK,HLX,CSMD3,FZD1,FBN2,CLCN5,FOXC1,COL8A1,COL9A2,SFRP1,COL12A1,CHODL,OLFML2B,WNT7A,WT1,POU3F1,SLITRK3,CRMP1,DKK1,OSR1,GLIPR2,PRKG1,DKK2,DCHS2,B4GALNT1,GATA2,GATA3,LAMP5,PDE10A,DCX,PTHLH,NEFL,COL24A1,ASTN2,MAFB,DLX2,GRIN3A,ST8SIA4,NOVA2,DUSP4,TTLL7,ZNF503,THBS2,INA,EGR2,ENTPD3,LTBP2,LY6H,EPHA3
Coexpression	MM657	MODY_HIPPOCAMPUS_NEONATAL	M2:CGP: Chemical and Genetic Perturbations	1.006e-10	9.382e-07	8.607e-09	8.364e-08	10	32	ACTG2,FABP5,UBE2E3,COL4A1,FN1,TNC,TUBB,TUBB2B,TUBA1A,CDH2
Coexpression Atlas	gudmap_developingLowerUrinaryTract_P1_ureter_200_k4	DevelopingLowerUrinaryTract_P1_ureter_emap-30363_k-means-cluster#4_top-relative-expression-ranked_200	Gudmap Mouse MOE430.2	1.033e-10	4.049e-07	1.919e-09	1.698e-08	10	27	ACTA2,ACTG2,CNN1,MYH11,MYLK,GBP1,TAGLN,NT5E,MSRB3,THBS2
Coexpression Atlas	gudmap_developingGonad_e14.5_ epididymis_1000	DevelopingGonad_e14.5_ epididymis_emap-29141_top-relative-expression-ranked_1000	Gudmap Mouse MOE430.2	1.042e-10	4.086e-07	1.927e-09	1.706e-08	48	801	TPM1,HMMR,MEIS2,CNOT6,CSRNP3,ARHGAP31,LTBP4,MEX3B,SFRP1,COL13A1,STARD4,CHODL,SFSWAP,WNT7A,LRRN3,MOXD1,NKD1,ZNF43,SCMH1,GIGYF2,PRKG1,INHBA,DOCK11,GAS1,RBM26,GATA2,AIF1L,PDE10A,GDF10,RBMS3,NFIB,NRK,SGCE,TAGLN,DNMT3A,DPYSL3,CALD1,GSK3B,EDNRA,TGFB2,SEMA3D,KATNBL1,R3HDM1,UBASH3B,CDH2,RBFOX2,SENP7,EPHA3
Coexpression	M45692	HE_LIM_SUN_FETAL_LUNG_C1_EARLY_STALK_CELL	C8: Cell Type Signature	1.048e-10	9.766e-07	8.878e-09	8.627e-08	35	567	TPM2,CADM4,E2F7,CHST6,HMMR,TUBB3,TUBB4A,ANLN,RAD54B,HSPA2,COL9A1,APLP1,STIL,RND3,UHRF1,IL17RD,DKK3,TCEAL7,GAS2,PARD6G,FJX1,MELK,NUAK1,SYT11,BUB1,KCNMB4,KIF3C,GPC2,WASF1,CTXN1,UACA,CDCA8,RFWD3,HSD17B14,ARHGAP19
Coexpression Atlas	gudmap_developingLowerUrinaryTract_e14.5_ urogenital sinus_1000_k3	DevelopingLowerUrinaryTract_e14.5_ urogenital sinus_emap-5517_k-means-cluster#3_top-relative-expression-ranked_1000	Gudmap Mouse MOE430.2	1.056e-10	4.138e-07	1.943e-09	1.72e-08	23	207	TUBB3,CNTN1,COL8A1,COL9A1,DPYSL4,CRMP1,MIAT,SPOCK1,C11orf87,NCAM2,TUBB2B,BRINP1,GDF10,DCX,NEFL,SYT11,SULF1,STMN3,GRIN3A,NNAT,RGS4,INA,ARMH4
Coexpression	M2395	SERVITJA_ISLET_HNF1A_TARGETS_UP	C2:CGP: Chemical and Genetic Perturbations	1.07e-10	9.974e-07	8.986e-09	8.732e-08	19	167	MCAM,MEIS2,FST,SDC1,AKAP12,POSTN,ARHGDIB,SNCG,DKK3,HTRA1,BGN,NEFL,RBMS3,NTM,TGFB2,THBS2,EGR2,TNFAIP2,LY6H
Coexpression Atlas	gudmap_developingLowerUrinaryTract_adult_bladder_500_k4	DevelopingLowerUrinaryTract_adult_bladder_emap-29457_k-means-cluster#4_top-relative-expression-ranked_500	Gudmap Mouse MOE430.2	1.084e-10	4.251e-07	1.986e-09	1.758e-08	17	107	TPM2,ACTA2,ACTG2,MYL9,FHL1,PLN,CNN1,SMTN,MYH11,MYLK,PTHLH,TAGLN,CALD1,NT5E,DTNA,MSRB3,THBS2
GO: Cellular Component	GO:0031012	extracellular matrix		1.114e-10	7.131e-08	3.919e-08	2.759e-07	43	665	ACTA2,FBN2,PKM,MMP11,LTBP4,COL4A1,COL6A3,COL8A1,COL9A1,COL9A2,SFRP1,COL12A1,COL13A1,FN1,TNC,OLFML2B,WNT7A,APLP1,CCDC80,POSTN,LRRN3,IGFBP7,CCN2,PRSS2,HTRA1,ADAM19,GDF10,BGN,OLFML2A,COL24A1,ANOS1,SULF1,GPC2,GPC1,ADAMTS8,ADAMTS5,TGFB2,THBS2,HMCN1,CCBE1,LTBP2,GREM1,CDH2
Coexpression Atlas	gudmap_dev gonad_e13.5_M_InterstitTestis_Sma_k4_500	dev gonad_e13.5_M_InterstitTestis_Sma_k-means-cluster#4_top-relative-expression-ranked_500	Gudmap Mouse ST 1.0	1.121e-10	4.392e-07	2.043e-09	1.808e-08	16	93	TPM1,MCC,SFRP1,FN1,RGS5,TNC,SGCD,CRABP2,POSTN,PRKG1,P4HA3,OLFML1,NRK,KRT7,LPAR1,EGR2
Coexpression Atlas	Facebase_RNAseq_ratio_e9.5_MandibularArch_vs_MaxillaryArch_2500_K4	FacebaseRNAseq_ratio_e9.5_MandibularArch_vs_MaxillaryArch_top-relative-expression-ranked_2500_k-means-cluster#4	FaceBase_RNAseq	1.129e-10	4.427e-07	2.05e-09	1.814e-08	45	721	EPHB2,TTYH1,MAP2,MEIS2,KIAA1549L,UBE2H,CSRNP3,SEMA5B,CPT1C,PCDH10,LTBP4,MGAT5B,IGLON5,COL8A1,STARD4,SEPTIN5,POGK,WNT7A,DPYSL4,APLP1,ZNF43,SCMH1,NCAM2,TUBB2B,BRINP1,DCX,CYRIA,TUBA1A,SYT11,SULF1,ZNF558,ASTN2,SGCE,WNK2,SHANK1,DDR1,DTNA,MAMLD1,TAMALIN,PIANP,GPR137C,TLE4,PAK3,SENP7,EPHA3
GO: Biological Process	GO:0035295	tube development		1.134e-10	6.493e-07	2.597e-08	2.397e-07	83	1864	EPHB2,EPHB6,EYA4,RAMP2,RHOJ,DACT2,MCAM,E2F7,HLX,MEIS2,FZD1,FBN2,HOXD11,PKM,AMOTL2,FST,SDC1,FOXC1,WDR48,FOXC2,COL4A1,JCAD,COL8A1,TEAD2,SFRP1,FN1,TNC,SGCD,PODXL,WNT7A,WT1,SOSTDC1,STIL,NKD1,DKK1,IGFBP7,CELF1,OSR1,CCN2,CTNS,DCBLD2,ATP2B4,MYH11,ARHGAP24,MYLK,GAS1,GATA2,GATA3,PARD6G,MARCKSL1,PTHLH,SEPTIN6,SULF1,NFIB,ARHGEF9,GPC1,SLC12A6,CACNA1C,DDR1,ZEB1,SASH1,CALD1,PLXDC1,CAMK2G,NKIRAS2,TFAP2A,LPAR1,G…
Coexpression Atlas	facebase_RNAseq_e10.5_NeuroEpith_central_2500	facebase_RNAseq_e10.5_NeuroEpith_central_2500	Gudmap RNAseq	1.135e-10	4.449e-07	2.05e-09	1.815e-08	75	1621	EPHB2,TTYH1,MAP2,CADM4,BACH2,E2F7,HMMR,REEP2,EHD3,SBK1,TUBB4A,KIAA1549L,SEMA5B,PGAP1,RAD54B,AMOTL2,FHL1,IGLON5,RBM38,CEP85,PODXL,WNT7A,DPYSL4,APLP1,STIL,CRIP2,CRMP1,RND3,TAF9B,ZNF43,UHRF1,IL17RD,MYCL,CCP110,RBM26,TUBB2B,FJX1,DCX,MELK,GGA3,NEFL,ST6GAL2,TSPAN17,NUAK1,TUBA1A,SYT11,SULF1,STMN3,BUB1,ZNF558,SGCE,NKAIN1,NNAT,ST8SIA4,PCBP4,WNK2,NOVA2,SHANK1,ZEB1,DTNA,CNTRL,MAMLD1,PSCA,TAMALIN,TLE4,PAK3,P…
Coexpression	M45694	HE_LIM_SUN_FETAL_LUNG_C1_GHRL_POS_NE_PRECURSOR_CELL	C8: Cell Type Signature	1.153e-10	1.075e-06	9.595e-09	9.323e-08	30	428	EYA4,MAP2,REEP2,ADCY2,TUBB3,CNTN1,TOM1L2,COL12A1,APLP1,NLRP2,CRMP1,DLL3,TCEAL7,INHBA,DOCK11,DCX,NUAK1,SYT11,STMN3,WASF1,WNK2,CTXN1,DPYSL3,DUSP4,MAMLD1,CBFA2T3,RGS4,TTLL7,SLC7A5,LY6H
Coexpression	M41670	TRAVAGLINI_LUNG_LYMPHATIC_CELL	C8: Cell Type Signature	1.176e-10	1.097e-06	9.704e-09	9.43e-08	21	209	RHOJ,FABP5,LTBP4,SFRP1,FN1,CCDC80,AKAP12,IGFBP7,GLIPR2,SNCG,DKK3,PARD6G,P4HA3,SGCE,STMN1,SEMA3D,C1orf198,LMNA,FRMD6,SMAD1,PHLDB2
GO: Biological Process	GO:0007155	cell adhesion		1.223e-10	7.002e-07	2.693e-08	2.486e-07	79	1735	TPM1,EPHB2,EPHB6,TTYH1,CDKN2A,PDE4D,CADM4,CNTNAP3,DACT2,MCAM,HLX,TRIM29,TENM2,FBN2,MYL9,PCDH10,MAP4K4,SDC1,MEX3B,CNTN1,FOXC2,JCAD,COL6A3,COL8A1,SFRP1,COL12A1,COL13A1,FN1,TNC,PODXL,NLGN4Y,APLP1,CCDC80,SLITRK3,RND3,POSTN,IGFBP7,LYPD3,PDE5A,CCN2,LIMCH1,PRKG1,DCBLD2,CNTNAP3B,PRSS2,MYADM,DCHS2,ADAM19,SPOCK1,PCDHB5,GATA3,GBP1,NCAM2,ANOS1,NUAK1,SULF1,NTM,NECTIN1,ASTN2,SGCE,ST8SIA4,DDR1,ZEB1,PCDHGB6,NT5E…
GO: Cellular Component	GO:0030312	external encapsulating structure		1.225e-10	7.838e-08	3.919e-08	2.759e-07	43	667	ACTA2,FBN2,PKM,MMP11,LTBP4,COL4A1,COL6A3,COL8A1,COL9A1,COL9A2,SFRP1,COL12A1,COL13A1,FN1,TNC,OLFML2B,WNT7A,APLP1,CCDC80,POSTN,LRRN3,IGFBP7,CCN2,PRSS2,HTRA1,ADAM19,GDF10,BGN,OLFML2A,COL24A1,ANOS1,SULF1,GPC2,GPC1,ADAMTS8,ADAMTS5,TGFB2,THBS2,HMCN1,CCBE1,LTBP2,GREM1,CDH2
Coexpression Atlas	Facebase_RNAseq_e8.5_Non-Floor Plate Neural Epithelium_1000_K2	FacebaseRNAseq_e8.5_Non-Floor Plate Neural Epithelium_top-relative-expression-ranked_1000_k-means-cluster#2	FaceBase_RNAseq	1.336e-10	5.236e-07	2.402e-09	2.126e-08	25	248	MEIS2,TUBB3,KIAA1549L,SEMA5B,FHL1,LTBP4,COL8A1,DPYSL4,POU3F1,CRMP1,ZNF43,NCAM2,DCX,SYT11,ASTN2,NOVA1,SHANK1,DTNA,MAMLD1,SOX21,PAK3,TOX2,CDH2,SENP7,EPHA3
Coexpression	M2446	PLASARI_TGFB1_TARGETS_10HR_DN	C2:CGP: Chemical and Genetic Perturbations	1.356e-10	1.264e-06	1.109e-08	1.078e-07	23	255	EYA4,MAP2,RCBTB2,HMMR,MEIS2,SBK1,MMP11,FOXC1,SESN3,RND3,LRRN3,OSR1,PDE5A,GAS1,GAS2,FBXL7,SYT11,NFIB,BUB1,STMN1,ADAMTS5,PWWP3B,CDH2
Coexpression	M12225	PICCALUGA_ANGIOIMMUNOBLASTIC_LYMPHOMA_UP	C2:CGP: Chemical and Genetic Perturbations	1.406e-10	1.311e-06	1.14e-08	1.108e-07	21	211	TPM1,ACTA2,MYL9,ARHGAP29,COL4A1,TEAD2,COL12A1,FN1,RGS5,TNC,CCDC80,RND3,IGFBP7,MYLK,SULF1,NFIB,TAGLN,DPYSL3,CALD1,LPAR1,TJP1
Coexpression Atlas	gudmap_developingLowerUrinaryTract_e13.5_bladder neck-urethr mesench_1000_k1	DevelopingLowerUrinaryTract_e13.5_bladder neck-urethr mesench_emap-3087_k-means-cluster#1_top-relative-expression-ranked_1000	Gudmap Mouse MOE430.2	1.406e-10	5.511e-07	2.516e-09	2.227e-08	24	229	EYA4,MAP2,BACH2,CSRNP3,SLITRK6,FST,PCDH10,LRP12,RND3,DKK1,LIMCH1,DKK2,GAS2,COL24A1,ST6GAL2,DPYSL3,PCDHB10,LPAR1,EDNRA,SERTAD4,PAK3,CDH2,TPBG,EPHA3
Coexpression Atlas	Facebase_RNAseq_ratio_e10.5_MaxillaryArch_vs_Mandibular_2500_K5	FacebaseRNAseq_ratio_e10.5_MaxillaryArch_vs_Mandibular_top-relative-expression-ranked_2500_k-means-cluster#5	FaceBase_RNAseq	1.413e-10	5.539e-07	2.518e-09	2.228e-08	45	726	PDE4D,BACH2,PENK,RFTN2,FZD1,SLITRK6,MARCHF4,PCYT1B,COL6A3,COL9A2,RGS5,OLFML2B,ZFP14,SP110,POSTN,ARHGDIB,IGFBP7,ZKSCAN1,NSG1,OSR1,ATP2B4,DKK3,DKK2,P4HA3,BGN,OLFML2A,COL24A1,ST6GAL2,OLFML1,NFIB,CCDC3,ARHGEF9,EXOC6B,MAFB,GPC2,GRIN3A,DNMT3A,EHBP1,CACNA1C,KRT7,THBS2,CCBE1,SERTAD4,UBASH3B,HSD17B14
Coexpression	M7409	MODY_HIPPOCAMPUS_NEONATAL	C2:CGP: Chemical and Genetic Perturbations	1.422e-10	1.325e-06	1.143e-08	1.11e-07	10	33	ACTG2,FABP5,UBE2E3,COL4A1,FN1,TNC,TUBB,TUBB2B,TUBA1A,CDH2
Coexpression Atlas	Facebase_RNAseq_ratio_e9.5_MaxillaryArch_vs_Mandibular_1000_K2	FacebaseRNAseq_ratio_e9.5_MaxillaryArch_vs_Mandibular_top-relative-expression-ranked_1000_k-means-cluster#2	FaceBase_RNAseq	1.456e-10	5.708e-07	2.583e-09	2.286e-08	25	249	TTYH1,MEIS2,TUBB3,KIAA1549L,CSRNP3,SEMA5B,PCDH10,LTBP4,IGLON5,COL8A1,DPYSL4,APLP1,ZNF43,NCAM2,DCX,NTM,ASTN2,WNK2,SHANK1,DTNA,MAMLD1,THBS2,TOX2,SENP7,EPHA3
Coexpression Atlas	Arv_EB-LF_1000	AravindRamakr_EmbryoidBody-LF_top-relative-expression-ranked_1000	PCBC	1.531e-10	6.002e-07	2.703e-09	2.393e-08	54	981	CPA4,VGLL3,BACH2,PENK,ACTA2,DACT2,ACTG2,SBK1,EVA1A,SLITRK6,PLN,IGLON5,PDZD4,ISLR2,COL6A3,COL9A1,FN1,TNC,CCDC80,NLRP2,POSTN,MOXD1,OSR1,DCBLD2,MIAT,DKK2,H19,SERPINB7,INHBA,P4HA3,GDF10,DCX,PTHLH,BGN,COL24A1,ST6GAL2,OLFML1,SULF1,NRK,DLX2,NNAT,KRT7,NIPAL4,PCDHGB6,RGS4,TGFB2,PLEKHG4B,SEMA3D,THBS2,HMCN1,PWWP3B,GREM1,LY6H,EPHA3
Coexpression	MM1083	DURAND_STROMA_S_UP	M2:CGP: Chemical and Genetic Perturbations	1.538e-10	1.434e-06	1.225e-08	1.191e-07	25	304	EYA4,PDE4D,BACH2,EHD3,FZD1,SEMA3F,PODXL,CCDC80,IFIT1,CRIP2,POSTN,TAF9B,B4GALNT1,ADAM19,GAS2,GATA3,NOVA1,DPYSL3,TSC22D3,TFAP2A,LPAR1,RGS4,LTBP2,LY6H,UBASH3B
Coexpression Atlas	gudmap_dev gonad_e12.5_F_VasAssMesen_MafB_1000	dev gonad_e12.5_F_VasAssMesen_MafB_top-relative-expression-ranked_1000	Gudmap Mouse ST 1.0	1.567e-10	6.144e-07	2.743e-09	2.428e-08	47	783	TPM1,MAP2,MCC,ADCY2,FBN2,MYL9,ARHGAP29,FST,CAP2,COL6A3,SFRP1,COL12A1,RGS5,SGCD,PODXL,WT1,SESN3,CCDC80,CRABP2,POSTN,NKD1,SCMH1,NSG1,OSR1,DCBLD2,H19,MYH11,DENND2B,OLFML1,SULF1,NFIB,NRK,NNAT,WASF1,KRT7,CALD1,PLXDC1,EDNRA,TGFB2,SEMA3D,THBS2,HMCN1,FRMD6,EGR2,VASH2,PBX3,CDH12
Coexpression Atlas	gudmap_developingLowerUrinaryTract_P2_bladder stroma (LCM)_1000	DevelopingLowerUrinaryTract_P2_bladder stroma (LCM)_emap-30396_top-relative-expression-ranked_1000	Gudmap Mouse MOE430.2	1.567e-10	6.144e-07	2.743e-09	2.428e-08	47	783	TPM2,TTYH1,VGLL3,RHOJ,ACTA2,ACTG2,CSMD3,ABCA9,UPK3A,SLITRK6,FHL1,PCDH10,CNN1,CNTN1,COL8A1,COL12A1,CHODL,RGS5,TNC,SOSTDC1,IGFBP7,CYYR1,LYPD3,PDE5A,CCN2,DKK3,MYH11,HTRA1,MYLK,SPOCK1,GBP1,C11orf87,BGN,TAGLN,KRT7,NIPAL4,PLXDC1,NT5E,ADAMTS5,RGS4,MSRB3,TBX18,THBS2,LMNA,EGR2,SLC7A5,TNFAIP2
Coexpression Atlas	gudmap_developingKidney_e13.5_podocyte cells_1000_k3	DevelopingKidney_e13.5_podocyte cells_emap-27773_k-means-cluster#3_top-relative-expression-ranked_1000	Gudmap Mouse MOE430.2	1.587e-10	6.22e-07	2.764e-09	2.447e-08	25	250	VGLL3,EYA4,TENM2,ADCY2,CSRNP3,CNTN1,COL9A1,POU3F1,POSTN,GLIPR2,DKK3,ADAM19,SPOCK1,GDF10,COL24A1,CYRIA,OLFML1,NTM,GRIN3A,CACNA1C,RGS4,TTLL7,TBX18,THBS2,EPHA3
Coexpression Atlas	gudmap_dev gonad_e12.5_F_VasAssocMesStromOvary_Sma_k4_1000	dev gonad_e12.5_F_VasAssocMesStromOvary_Sma_k-means-cluster#4_top-relative-expression-ranked_1000	Gudmap Mouse ST 1.0	1.642e-10	6.435e-07	2.848e-09	2.52e-08	18	125	ACTA2,MCC,COL6A3,SFRP1,FN1,SGCD,OLFML2B,GLIPR2,INHBA,P4HA3,BGN,CYRIA,CALD1,EDNRA,TGFB2,HMCN1,EPHA3,ARMH4
Coexpression	M45033	CARRILLOREIXACH_HEPATOBLASTOMA_VS_NORMAL_UP	C2:CGP: Chemical and Genetic Perturbations	1.748e-10	1.63e-06	1.381e-08	1.342e-07	45	893	EPHB2,CDKN2A,ASIC2,E2F7,CHST6,NDRG3,REEP2,FABP5,PGAP1,PKM,MMP11,MAP4K4,TRIM46,COL4A1,JCAD,TEAD2,PODXL,OLFML2B,NKD1,DKK1,RASL11B,SPOCK1,MARCKSL1,AIF1L,SEPTIN2,OLFML2A,NUAK1,SYT11,NTM,NECTIN1,BUB1,DLX2,GPC2,TAF6,RHNO1,DNMT3A,ZNF704,UACA,STMN1,TGFB2,IFT52,VASH2,R3HDM1,LY6H,RASD2
Coexpression	M41716	FAN_OVARY_CL14_MATURE_SMOOTH_MUSCLE_CELL	C8: Cell Type Signature	1.767e-10	1.647e-06	1.384e-08	1.345e-07	25	306	TPM1,TPM2,ACTA2,MCAM,MYL9,PLN,HSPA2,PLS3,RGS5,ID3,CRIP2,IGFBP7,ISG15,MYADM,MYH11,MYLK,BGN,SEPTIN2,TUBA1A,CCDC3,MAFB,TAGLN,CALD1,TSC22D3,MSRB3
Coexpression Atlas	gudmap_kidney single cell_e11.5_MetanephMesench_Scamp_k2_1000	kidney single cell_e11.5_MetanephMesench_StemCellamp_k-means-cluster#2_top-relative-expression-ranked_1000	Gudmap Mouse MOE430.2	1.825e-10	7.152e-07	3.151e-09	2.789e-08	21	176	NREP,MEIS2,TUBB4A,MEX3A,RBM38,FOXC1,TEAD2,COL9A1,TUBB,ID3,DPYSL4,CRABP2,POSTN,H19,MYADM,MEIS3,ARHGEF9,KCNMB4,TAF1C,CDCA8,GSK3B
Coexpression Atlas	gudmap_developingLowerUrinaryTract_e14.5_ urogenital sinus_500_k1	DevelopingLowerUrinaryTract_e14.5_ urogenital sinus_emap-5517_k-means-cluster#1_top-relative-expression-ranked_500	Gudmap Mouse MOE430.2	1.838e-10	7.206e-07	3.16e-09	2.797e-08	16	96	TUBB3,COL8A1,COL9A1,DPYSL4,SPOCK1,C11orf87,NCAM2,TUBB2B,GDF10,DCX,NEFL,STMN3,GRIN3A,NNAT,RGS4,INA
Coexpression Atlas	gudmap_developingKidney_e14.5 whole kidney - Wnt4 KO_1000_k2	DevelopingKidney_e14.5 whole kidney - Wnt4 KO_emap-6674_k-means-cluster#2_top-relative-expression-ranked_1000	Gudmap Mouse MOE430.2	1.862e-10	7.301e-07	3.188e-09	2.822e-08	19	142	TPM1,CAP2,COL6A3,CDC42EP3,AKAP12,NKD1,PDE5A,GATA2,RBMS3,SULF1,NFIB,NRK,SYT1,ST8SIA4,EHBP1,CALD1,TGFB2,TBX18,LY6H
Coexpression Atlas	gudmap_developingKidney_e15.5_Ureteral Smooth Musc_100_k1	DevelopingKidney_e15.5_Ureteral Smooth Musc_emap-28812_k-means-cluster#1_top-relative-expression-ranked_100	Gudmap Mouse MOE430.2	1.942e-10	7.611e-07	3.309e-09	2.929e-08	12	47	ACTG2,CAP2,COL9A1,POU3F1,DKK3,MYH11,MYLK,CYRIA,TAGLN,NT5E,MSRB3,TBX18
Coexpression	M45663	HE_LIM_SUN_FETAL_LUNG_C0_ASPN_POS_CHONDROCYTE	C8: Cell Type Signature	2.038e-10	1.899e-06	1.583e-08	1.538e-07	16	117	TTYH1,EYA4,FBN2,FST,FOXC1,COL8A1,COL9A1,COL9A2,COL12A1,CDC42EP3,INHBA,ANOS1,NRK,ZEB1,THBS2,SERTAD4
Coexpression	M2905	LEF1_UP.V1_UP	C6: Oncogenic Signature	2.064e-10	1.924e-06	1.59e-08	1.545e-07	20	194	CDKN2A,RAMP2,MYL9,FHL1,FN1,WT1,CRABP2,AKAP12,DKK1,IGFBP7,DLL3,ADAM19,GATA3,TUBB2B,FJX1,ADAMTS8,EGR2,LTBP2,DHRS2,PLEKHO1
Coexpression	M12004	SENESE_HDAC1_AND_HDAC2_TARGETS_DN	C2:CGP: Chemical and Genetic Perturbations	2.143e-10	1.997e-06	1.637e-08	1.591e-07	22	238	TPM1,KATNAL1,TENM2,MYL9,MGAT5B,PLS3,SDC1,CAP2,SESN3,CCDC80,CDC42EP3,IGFBP7,MYLK,TUBA1A,RBMS3,NFIB,TAGLN,GPC1,CALD1,DTNA,ZNF503,TGFB2
Coexpression Atlas	gudmap_developingLowerUrinaryTract_P1_bladder_200_B	DevelopingLowerUrinaryTract_P1_bladder_B_emap-30374_top-relative-expression-ranked_200	Gudmap Mouse MOE430.2	2.145e-10	8.407e-07	3.611e-09	3.196e-08	20	160	ACTA2,ACTG2,MYL9,UPK3A,CNN1,RGS5,SMTN,SCUBE2,OSR1,MYH11,MYLK,PTHLH,TAGLN,GLIPR1,KRT7,NIPAL4,CALD1,NT5E,CAMK2G,THBS2
Coexpression Atlas	gudmap_dev lower uro neuro_e15.5_PelvicGanglion_Sox10_k2_500	dev lower uro neuro_e15.5_PelvicGanglion_Sox10_k-means-cluster#2_top-relative-expression-ranked_500	Gudmap Mouse ST 1.0	2.146e-10	8.413e-07	3.611e-09	3.196e-08	18	127	EYA4,PENK,ACTA2,FBN2,COL6A3,COL12A1,FN1,CRABP2,MOXD1,OSR1,PDE5A,BRINP1,SULF1,GRIN3A,LPAR1,EDNRA,THBS2,HMCN1
Coexpression Atlas	DevelopingLowerUrinaryTract_e14.5_ urogenital sinus_emap-6689_k2_500	DevelopingLowerUrinaryTract_e14.5_ urogenital sinus_emap-6689_k-means-cluster#2_top-relative-expression-ranked_500	Gudmap Mouse MOE430.2	2.146e-10	8.413e-07	3.611e-09	3.196e-08	18	127	MAP2,CSMD3,TUBB3,CNTN1,COL8A1,MIAT,SPOCK1,C11orf87,NCAM2,DCX,NEFL,SYT11,STMN3,GRIN3A,NOVA1,ADAMTS5,RGS4,INA
Coexpression	M45668	HE_LIM_SUN_FETAL_LUNG_C0_EARLY_MESOTHELIAL_CELL	C8: Cell Type Signature	2.323e-10	2.165e-06	1.76e-08	1.711e-07	35	584	EPHB2,CADM4,PLPPR3,MEIS2,TUBB4A,UBE2H,ARHGAP29,AMOTL2,MMP11,IGLON5,CAP2,CCDC74B,RGS5,PODXL,OLFML2B,WT1,APLP1,CRABP2,CDC42EP3,NSG1,DOCK11,TUBB2B,AIF1L,ST6GAL2,FBXL7,SULF1,WASF1,CTXN1,DDR1,ADAMTS5,TGFB2,LY6H,CDH2,TPBG,EPHA3
Coexpression	M39246	LAKE_ADULT_KIDNEY_C27_VASCULAR_SMOOTH_MUSCLE_CELLS_AND_PERICYTES	C8: Cell Type Signature	2.368e-10	2.207e-06	1.78e-08	1.73e-07	18	155	TPM1,ACTA2,MCAM,MEIS2,COL4A1,AKAP12,PRKG1,MYH11,MYLK,FBXL7,RBMS3,TAGLN,ZNF704,CACNA1C,ZEB1,CALD1,MSRB3,TJP1
Coexpression Atlas	gudmap_developingLowerUrinaryTract_e14.5_ urethra_500_k4	DevelopingLowerUrinaryTract_e14.5_ urethra_emap-30892_k-means-cluster#4_top-relative-expression-ranked_500	Gudmap Mouse MOE430.2	2.54e-10	9.955e-07	4.254e-09	3.766e-08	12	48	ACTA2,ACTG2,TENM2,CAP2,OSR1,PDE5A,DKK3,MYH11,MYLK,CYRIA,NRK,MSRB3
Coexpression	M2030	NAKAMURA_ADIPOGENESIS_LATE_DN	C2:CGP: Chemical and Genetic Perturbations	2.734e-10	2.549e-06	2.039e-08	1.981e-07	10	35	TPM1,ACTG2,POSTN,DKK3,MYH11,GLIPR1,CALD1,NT5E,THBS2,SLC7A5
Coexpression	MM456	LAZARO_GENETIC_MOUSE_MODEL_HIGH_GRADE_SMALL_CELL_NEUROENDOCRINE_LUNG_CARCINOMA_UP	M2:CGP: Chemical and Genetic Perturbations	2.835e-10	2.643e-06	2.097e-08	2.038e-07	38	680	EPHB2,CDKN2A,CADM4,E2F7,MCM5,HMMR,REEP2,SBK1,ANLN,CPT1C,RAD54B,PKM,PDZD4,PCYT1B,CEP85,TUBB,SESN3,APLP1,STIL,CRMP1,UHRF1,DCBLD2,CCP110,MELK,SYT1,PCBP4,WNK2,EHBP1,PCDHB10,SAE1,STMN1,CDCA8,INA,VASH2,SERTAD4,CDH2,RBFOX2,ARHGAP19
Coexpression	M41750	RUBENSTEIN_SKELETAL_MUSCLE_FBN1_FAP_CELLS	C8: Cell Type Signature	2.948e-10	2.748e-06	2.164e-08	2.103e-07	24	289	PKM,ALDH1A3,FHL1,LTBP4,COL6A3,BIN1,COL12A1,FN1,TUBB,CCDC80,AKAP12,ARL4D,GLIPR2,MYADM,HTRA1,GAS1,OLFML2A,TUBA1A,RBMS3,NTM,NOVA1,ADAMTS5,LMNA,TNFAIP2
Coexpression Atlas	gudmap_developingKidney_e15.5_Ureteral Smooth Musc_100	DevelopingKidney_e15.5_Ureteral Smooth Musc_emap-28812_top-relative-expression-ranked_100	Gudmap Mouse MOE430.2	2.959e-10	1.16e-06	4.936e-09	4.369e-08	15	85	EYA4,ACTG2,CAP2,CNTN1,COL9A1,POU3F1,DKK3,MYH11,MYLK,CYRIA,TAGLN,NT5E,MSRB3,TBX18,RBFOX2
Coexpression Atlas	gudmap_developingGonad_e18.5_testes_1000_k2	DevelopingGonad_e18.5_testes_emap-11164_k-means-cluster#2_top-relative-expression-ranked_1000	Gudmap Mouse MOE430.2	3.162e-10	1.24e-06	5.252e-09	4.649e-08	9	22	TUBB3,SNRPN,TUBB2B,NNAT,PCBP4,DPYSL3,GSK3B,LY6H,EPHA3
Coexpression Atlas	gudmap_dev gonad_e12.5_M_InterstitTestis_Sma_k2_500	dev gonad_e12.5_M_InterstitTestis_Sma_k-means-cluster#2_top-relative-expression-ranked_500	Gudmap Mouse ST 1.0	3.178e-10	1.246e-06	5.256e-09	4.652e-08	18	130	ACTA2,LTBP4,COL6A3,FN1,OLFML2B,SOSTDC1,LRRN3,GLIPR2,PDE5A,ATP2B4,INHBA,BGN,CALD1,ADAMTS5,EDNRA,TGFB2,HMCN1,ARMH4
Coexpression Atlas	Facebase_RNAseq_e10.5_Olfactory Pit_1000_K2	FacebaseRNAseq_e10.5_Olfactory Pit_top-relative-expression-ranked_1000_k-means-cluster#2	FaceBase_RNAseq	3.206e-10	1.257e-06	5.28e-09	4.673e-08	26	279	MAP2,MEIS2,TUBB3,KIAA1549L,SEMA5B,LTBP4,COL8A1,DPYSL4,ZNF43,MYCL,CCP110,NCAM2,BRINP1,DCX,STMN3,SHANK1,DPYSL3,DTNA,MAMLD1,SOX21,PAK3,TOX2,CDH2,EPB41,SENP7,EPHA3
Coexpression Atlas	gudmap_developingGonad_e14.5_ epididymis_500	DevelopingGonad_e14.5_ epididymis_emap-29141_top-relative-expression-ranked_500	Gudmap Mouse MOE430.2	3.366e-10	1.32e-06	5.521e-09	4.887e-08	32	413	TPM1,MEIS2,MEX3B,SFRP1,COL13A1,CHODL,SFSWAP,WNT7A,SCMH1,PRKG1,INHBA,DOCK11,RBM26,AIF1L,PDE10A,GDF10,RBMS3,NFIB,NRK,SGCE,DNMT3A,DPYSL3,CALD1,GSK3B,EDNRA,TGFB2,KATNBL1,R3HDM1,CDH2,RBFOX2,SENP7,EPHA3
Coexpression	M6212	GSE2405_0H_VS_3H_A_PHAGOCYTOPHILUM_STIM_NEUTROPHIL_UP	C7:IMMUNESIGDB: ImmuneSigDB	3.56e-10	3.319e-06	2.573e-08	2.5e-07	20	200	RHOJ,CADM4,ACTG2,TRIM29,CPT1C,PLS3,COL4A1,COL6A3,IGFBP7,MYH11,HTRA1,BGN,OLFML2A,OLFML1,GPC1,DUSP4,LPAR1,VASH2,LTBP2,LY6H
Coexpression	M6200	GSE2405_HEAT_KILLED_LYSATE_VS_LIVE_A_PHAGOCYTOPHILUM_STIM_NEUTROPHIL_24H_UP	C7:IMMUNESIGDB: ImmuneSigDB	3.56e-10	3.319e-06	2.573e-08	2.5e-07	20	200	TPM2,ACTG2,TRIM29,FABP5,SFRP1,FN1,RGS5,CDC42EP3,MYH11,HTRA1,PARD6G,MARCKSL1,NUAK1,TAGLN,GPC1,KRT7,DUSP4,RGS12,TNFAIP2,SMAD1
Coexpression Atlas	gudmap_dev lower uro neuro_e14.5_PelvicGanglion_Sox10_k4_1000	dev lower uro neuro_e14.5_PelvicGanglion_Sox10_k-means-cluster#4_top-relative-expression-ranked_1000	Gudmap Mouse ST 1.0	3.613e-10	1.416e-06	5.901e-09	5.223e-08	18	131	CSMD3,TUBB3,CRMP1,POSTN,NSG1,SNRPN,GATA3,SEPTIN6,NEFL,TSPAN17,SYT11,NRK,SYT1,ASTN2,NNAT,NOVA1,DPYSL3,INA
Coexpression	M39072	MANNO_MIDBRAIN_NEUROTYPES_HSERT	C8: Cell Type Signature	3.851e-10	3.59e-06	2.761e-08	2.683e-07	30	450	PLPPR3,TENM2,ADCY1,SBK1,TUBB3,TUBB4A,CSRNP3,CNTN1,TRIM46,CHODL,APLP1,CRMP1,NSG1,RAB15,SNCG,SPOCK1,GATA2,GATA3,BRINP1,DCX,SEPTIN6,RBMS3,SYT1,GRIN3A,CACNA1C,DPYSL3,MSANTD3-TMEFF1,INA,LY6H,RBFOX2
Coexpression Atlas	gudmap_developingLowerUrinaryTract_P1_ureter_1000_k2	DevelopingLowerUrinaryTract_P1_ureter_emap-30363_k-means-cluster#2_top-relative-expression-ranked_1000	Gudmap Mouse MOE430.2	4.199e-10	1.646e-06	6.83e-09	6.045e-08	21	184	TPM2,ACTA2,ACTG2,MYL9,CNN1,COL12A1,RGS5,CDC42EP3,AKAP12,POSTN,CCN2,DKK3,MYH11,MYLK,CYRIA,TAGLN,NT5E,ADAMTS5,MSRB3,THBS2,RASD2
Coexpression Atlas	Facebase_RNAseq_ratio_e10.5_MandibularArch_vs_MaxillaryArch_2500_K4	FacebaseRNAseq_ratio_e10.5_MandibularArch_vs_MaxillaryArch_top-relative-expression-ranked_2500_k-means-cluster#4	FaceBase_RNAseq	4.333e-10	1.698e-06	7.018e-09	6.212e-08	39	591	EYA4,PDE4D,RFTN2,FZD1,SLITRK6,MARCHF4,COL6A3,COL9A2,MRAS,OLFML2B,ZFP14,SP110,POSTN,ARHGDIB,IGFBP7,NSG1,OSR1,ATP2B4,DKK3,DKK2,GAS2,P4HA3,COL24A1,ST6GAL2,OLFML1,NFIB,CCDC3,ARHGEF9,EXOC6B,MAFB,KAZN,GPC2,GRIN3A,DNMT3A,CACNA1C,KRT7,THBS2,LMNA,HSD17B14
Coexpression Atlas	gudmap_developingKidney_e15.5_Pelvic Mesenchyme_1000_k2	DevelopingKidney_e15.5_Pelvic Mesenchyme_emap-8241_k-means-cluster#2_top-relative-expression-ranked_1000	Gudmap Mouse MOE430.2	4.604e-10	1.805e-06	7.427e-09	6.573e-08	27	305	ATXN7L1,PENK,ADCY2,FZD1,MYL9,PCDH10,CNTN1,POU3F1,CCDC80,CDC42EP3,AKAP12,SCUBE2,GLIPR2,DKK3,MYLK,GATA2,NTM,TAGLN,RGS4,MSRB3,TBX18,THBS2,CCBE1,SERTAD4,LY6H,PBX3,EPHA3
Coexpression Atlas	gudmap_developingLowerUrinaryTract_e13.5_bladder neck-urethr epithel_1000_k2	DevelopingLowerUrinaryTract_e13.5_bladder neck-urethr epithel_emap-30875_k-means-cluster#2_top-relative-expression-ranked_1000	Gudmap Mouse MOE430.2	4.843e-10	1.898e-06	7.78e-09	6.886e-08	19	150	EYA4,TENM2,SLITRK6,FST,PCDH10,UBE2E3,PCYT1B,COL8A1,POGK,WNT7A,RND3,ST6GAL2,NTM,DLX2,TFAP2A,SEMA3D,SERTAD4,PAK3,TPBG
Coexpression Atlas	gudmap_developingLowerUrinaryTract_e13.5_bladder mesenchyme_500_k3	DevelopingLowerUrinaryTract_e13.5_bladder mesenchyme_emap-3087_k-means-cluster#3_top-relative-expression-ranked_500	Gudmap Mouse MOE430.2	4.926e-10	1.931e-06	7.881e-09	6.976e-08	15	88	TPM1,VGLL3,ACTA2,ACTG2,MYL9,CNN1,OSR1,MYH11,GBP1,CYRIA,TAGLN,GLIPR1,ACTR3B,MSRB3,THBS2
Coexpression Atlas	DevelopingLowerUrinaryTract_e14.5_ bladder_emap-6668_k2_1000	DevelopingLowerUrinaryTract_e14.5_ bladder_emap-6668_k-means-cluster#2_top-relative-expression-ranked_1000	Gudmap Mouse MOE430.2	5.176e-10	2.029e-06	8.248e-09	7.3e-08	20	168	TRAF5,PDE4D,ABCA9,ANLN,PLN,CAP2,AKAP12,PDE5A,DKK3,ADAM19,MYLK,GBP1,C11orf87,CYRIA,NFIB,ACTR3B,TTLL7,MSRB3,TBX18,PSME3
Coexpression	M4913	IZADPANAH_STEM_CELL_ADIPOSE_VS_BONE_DN	C2:CGP: Chemical and Genetic Perturbations	5.27e-10	4.912e-06	3.75e-08	3.644e-07	15	107	ARHGAP29,HSPA2,CCDC80,AKAP12,POSTN,ATP2B4,MYH11,DOCK11,GATA3,NUAK1,NFIB,EHBP1,RGS4,LTBP2,SMAD1
GO: Biological Process	GO:0048568	embryonic organ development		5.394e-10	3.089e-06	1.144e-07	1.056e-06	54	1004	EPHB2,EYA4,E2F7,HLX,MEIS2,FBN2,HOXD11,ALDH1A3,SLITRK6,FST,PLS3,FOXC1,WDR48,FOXC2,COL8A1,TEAD2,COL9A1,SFRP1,FN1,ID3,STIL,NKD1,DKK1,CELF1,OSR1,CCN2,GAS1,GATA2,GATA3,PARD6G,TUBB2B,PTHLH,NRK,MAFB,DLX2,CACNA1C,ZEB1,CALD1,CAMK2G,TFAP2A,LPAR1,GSK3B,EDNRA,NCS1,ZNF503,TGFB2,TBX18,SEMA3D,IFT52,EGR2,VASH2,PBX3,CDH2,EPB41
Coexpression Atlas	JC_fibro_500	JC_fibro_top-relative-expression-ranked_500	PCBC	5.487e-10	2.151e-06	8.708e-09	7.708e-08	35	494	CPA4,ACTA2,HOXD11,EVA1A,FHL1,HSPA2,COL6A3,COL8A1,COL12A1,FN1,SGCD,CCDC80,IFIT1,MOXD1,DKK1,CCN2,IFI6,DKK3,SERPINB7,MYLK,GAS1,P4HA3,BGN,SULF1,IFI44L,KRT7,NIPAL4,ADAMTS5,TFAP2A,LPAR1,SEMA3D,THBS2,FRMD6,EGR2,GREM1
Coexpression Atlas	Facebase_ST1_e11.5_Emin_MedNasl_SingCel_500	e11.5_Emin_MedNasl_SingCel_top-relative-expression-ranked_500	FaceBase_ST1	5.639e-10	2.211e-06	8.913e-09	7.889e-08	31	398	EYA4,RHOJ,PLPPR3,RFTN2,NREP,SLITRK6,MMP11,FST,FOXC1,FOXC2,COL9A1,MRAS,RGS5,CDC42EP3,POSTN,ARHGDIB,DKK1,IGFBP7,OSR1,H19,GATA2,GATA3,PARD6G,P4HA3,BGN,NFIB,ZNF558,MAFB,TGFB2,NARF,HMCN1
Coexpression	M40180	DESCARTES_FETAL_EYE_STROMAL_CELLS	C8: Cell Type Signature	5.652e-10	5.269e-06	3.992e-08	3.879e-07	14	91	PENK,LTBP4,COL6A3,COL12A1,FN1,POSTN,DKK2,INHBA,PTHLH,SULT1E1,OLFML1,ADAMTS5,EDNRA,THBS2
Coexpression Atlas	DevelopingLowerUrinaryTract_e14.5_ bladder_emap-6668_500	DevelopingLowerUrinaryTract_e14.5_ bladder_emap-6668_top-relative-expression-ranked_500	Gudmap Mouse MOE430.2	5.783e-10	2.267e-06	9.105e-09	8.059e-08	32	422	VGLL3,ACTA2,ACTG2,ANLN,UPK3A,SLITRK6,UBE2E3,COL8A1,RND3,CYYR1,PDE5A,PRKG1,DKK3,MYH11,MYLK,GBP1,C11orf87,CYRIA,SULF1,NFIB,NRK,ST8SIA4,GLIPR1,NIPAL4,ACTR3B,RGS4,MSRB3,TBX18,THBS2,CDH2,RBFOX2,ARMH4
GO: Biological Process	GO:0040011	locomotion		5.941e-10	3.402e-06	1.215e-07	1.121e-06	81	1861	TPM1,EPHB2,IGSF8,EPHB6,PDE4D,RHOJ,CADM4,ACTA2,MCAM,MCC,E2F7,FAM89B,TENM2,ADCY1,TUBB3,FBN2,SEMA5B,AMOTL2,MAP4K4,PLS3,CNTN1,FOXC1,FOXC2,SEMA3F,JCAD,ISLR2,COL6A3,SFRP1,FN1,CHODL,TNC,PODXL,WNT7A,WT1,DPYSL4,CCDC80,AKAP12,CRMP1,POSTN,ARHGDIB,NKD1,DKK1,GLIPR2,LIMCH1,PRKG1,ATP2B4,MYADM,MYLK,GAS1,GATA2,GATA3,TUBB2B,NEFL,ANOS1,SULF1,NFIB,NECTIN1,NOVA1,NOVA2,DPYSL3,ZEB1,SASH1,STMN1,TFAP2A,LPAR1,GSK3B,EDNRA,…
Coexpression	MM1072	SERVITJA_ISLET_HNF1A_TARGETS_UP	M2:CGP: Chemical and Genetic Perturbations	6.259e-10	5.835e-06	4.379e-08	4.255e-07	19	185	MCAM,MEIS2,FST,SDC1,AKAP12,POSTN,ARHGDIB,SNCG,DKK3,HTRA1,BGN,NEFL,RBMS3,NTM,TGFB2,THBS2,EGR2,TNFAIP2,LY6H
Coexpression	M45675	HE_LIM_SUN_FETAL_LUNG_C0_MESENCHYMAL_2_CELL	C8: Cell Type Signature	6.294e-10	5.868e-06	4.379e-08	4.255e-07	24	300	MEIS2,FBN2,ANLN,EVA1A,AMOTL2,FST,CCDC74B,STARD4,OLFML2B,CRABP2,NSG1,UHRF1,CNTNAP3B,TUBB2B,MELK,SULF1,NTM,BUB1,RHNO1,CDCA8,HSD17B14,EPB41,PHLDB2,TPBG
Coexpression Atlas	gudmap_developingLowerUrinaryTract_P1_bladder_J_500_k4	DevelopingLowerUrinaryTract_P1_bladder_J_emap-30374_k-means-cluster#4_top-relative-expression-ranked_500	Gudmap Mouse MOE430.2	6.306e-10	2.472e-06	9.887e-09	8.751e-08	16	104	TPM1,ACTG2,TENM2,MYL9,CNN1,RGS5,SMTN,CCN2,MYH11,MYLK,PTHLH,TAGLN,GLIPR1,CALD1,NT5E,THBS2
Coexpression Atlas	gudmap_dev gonad_e11.5_M_GonadVasMes_Flk_k4_500	dev gonad_e11.5_M_GonadVasMes_Flk_k-means-cluster#4_top-relative-expression-ranked_500	Gudmap Mouse ST 1.0	6.363e-10	2.494e-06	9.925e-09	8.785e-08	22	207	MCC,MEIS2,FBN2,CAP2,COL6A3,SFRP1,RGS5,CRABP2,RND3,POSTN,NKD1,UHRF1,OLFML1,NRK,NNAT,CALD1,LPAR1,EDNRA,SEMA3D,HMCN1,EGR2,VASH2
Coexpression Atlas	gudmap_developingKidney_e14.5 whole kidney - Wnt4 KO_1000_k5	DevelopingKidney_e14.5 whole kidney - Wnt4 KO_emap-6674_k-means-cluster#5_top-relative-expression-ranked_1000	Gudmap Mouse MOE430.2	6.38e-10	2.501e-06	9.925e-09	8.785e-08	26	288	VGLL3,MAP2,ADCY2,FBN2,CSRNP3,SFRP1,SESN3,CDC42EP3,RND3,POSTN,DOCK11,SULT1E1,OLFML1,NTM,NOVA1,DPYSL3,TSC22D3,ADAMTS5,TAMALIN,LPAR1,EDNRA,TGFB2,SEMA3D,SERTAD4,SMAD1,SENP7
Coexpression	M14127	HELLER_HDAC_TARGETS_SILENCED_BY_METHYLATION_UP	C2:CGP: Chemical and Genetic Perturbations	6.835e-10	6.371e-06	4.72e-08	4.586e-07	30	461	TPM1,TUBB3,TUBB4A,ALDH1A3,FHL1,HSPA2,BIN1,FN1,APLP1,IFIT1,CRIP2,AKAP12,IFI6,PRSS2,GATA3,TUBB2B,MARCKSL1,NEFL,CYRIA,TUBA1A,SYT11,SYT1,MAFB,DLX2,WASF1,EGR2,TLE4,DHRS2,RBFOX2,EPHA3
Coexpression	M41671	TRAVAGLINI_LUNG_AIRWAY_SMOOTH_MUSCLE_CELL	C8: Cell Type Signature	7.332e-10	6.835e-06	5.026e-08	4.884e-07	18	166	TPM1,TPM2,ACTA2,MCAM,ACTG2,MYL9,PLN,CNN1,CAP2,CRIP2,IGFBP7,SNCG,MYH11,MYLK,KCNMB1,TAGLN,CAMK2G,MSRB3
Coexpression Atlas	gudmap_developingKidney_e11.5_metaneph mesench_1000	DevelopingKidney_e11.5_metaneph mesench_emap-3843_top-relative-expression-ranked_1000	Gudmap Mouse MOE430.2	7.604e-10	2.981e-06	1.178e-08	1.043e-07	48	850	TPM2,EYA4,E2F7,RCBTB2,MCM5,MEIS2,CSRNP3,MAP4K4,FOXC1,PCYT1B,FOXC2,COL9A1,CEP85,RGS5,DPYSL4,POU3F1,STIL,CRABP2,CRMP1,MOXD1,DKK1,ITPRIP,SNCG,C11orf87,BRINP1,AIF1L,DCX,NEFL,COL24A1,SYT11,TMCC2,KCNMB4,NKAIN1,KIF3C,GRIN3A,PCBP4,DNMT3A,CTXN1,GAL3ST4,SDAD1,GSK3B,TBX18,EGR2,VASH2,PSME3,TOX2,CDH2,TPBG
Coexpression Atlas	gudmap_dev gonad_e13.5_F_VascAssocMesenchStromOvary_MafB_500	dev gonad_e13.5_F_VascAssocMesenchStromOvary_MafB_top-relative-expression-ranked_500	Gudmap Mouse ST 1.0	7.808e-10	3.061e-06	1.205e-08	1.067e-07	29	357	ACTA2,ADCY2,FBN2,MYL9,ARHGAP29,FST,COL6A3,SFRP1,COL12A1,WT1,CCDC80,POSTN,NKD1,SCMH1,NSG1,H19,HTRA1,DENND2B,BGN,SULF1,NRK,CALD1,PLXDC1,EDNRA,THBS2,HMCN1,EGR2,PBX3,EPHA3
Coexpression	M2782	BMI1_DN.V1_UP	C6: Oncogenic Signature	8.005e-10	7.462e-06	5.447e-08	5.293e-07	17	147	CPA4,ACTA2,LTBP4,COL13A1,PODXL,DKK1,CTNS,B4GALNT1,INHBA,FJX1,PTHLH,TAGLN,NT5E,LCP1,TGFB2,SLC7A5,GREM1
Coexpression	MM1057	CAIRO_LIVER_DEVELOPMENT_UP	M2:CGP: Chemical and Genetic Perturbations	8.089e-10	7.54e-06	5.464e-08	5.309e-07	18	167	PKM,PLS3,LRP12,POGK,WT1,ID3,CRABP2,GAS1,MARCKSL1,GDF10,SEPTIN6,NNAT,WASF1,GPC1,EHBP1,TGFB2,SEMA3D,MSANTD3-TMEFF1
Coexpression Atlas	gudmap_developingGonad_e18.5_epididymis_500	DevelopingGonad_e18.5_epididymis_emap-13166_top-relative-expression-ranked_500	Gudmap Mouse MOE430.2	8.123e-10	3.184e-06	1.249e-08	1.105e-07	31	404	TPM1,PENK,ACTA2,MEIS2,LTBP4,SFRP1,STARD4,CHODL,SFSWAP,MOXD1,PRKG1,MYH11,INHBA,RBM26,AIF1L,GDF10,SULT1E1,RBMS3,NFIB,NRK,SGCE,TAGLN,DPYSL3,CALD1,GSK3B,EDNRA,THBS2,KATNBL1,LTBP2,R3HDM1,EPHA3
Coexpression	M45711	HE_LIM_SUN_FETAL_LUNG_C1_PULMONARY_NE_PRECURSOR_CELL	C8: Cell Type Signature	8.221e-10	7.663e-06	5.513e-08	5.357e-07	24	304	MAP2,ADCY1,ADCY2,TUBB3,SLITRK6,TRIM46,APLP1,CRMP1,DLL3,MIAT,DCX,SYT11,STMN3,SYT1,KRT7,DPYSL3,CBFA2T3,TAMALIN,RGS4,TTLL7,SOX21,INA,CDH2,TPBG
Coexpression Atlas	gudmap_developingLowerUrinaryTract_e14.5_ Genital tubercle F_500	DevelopingLowerUrinaryTract_e14.5_ Genital tubercle F_emap-6706_top-relative-expression-ranked_500	Gudmap Mouse MOE430.2	8.223e-10	3.223e-06	1.259e-08	1.115e-07	32	428	VGLL3,EYA4,PDE4D,TENM2,FBN2,CSRNP3,SLITRK6,PCDH10,COL8A1,LRP12,TNC,SOSTDC1,RND3,DKK1,LYPD3,GIGYF2,LIMCH1,SPOCK1,NEFL,ST6GAL2,NTM,DLX2,DPYSL3,NT5E,PCDHB10,GAL3ST4,TFAP2A,EDNRA,TBX18,GREM1,TPBG,EPHA3
Coexpression	M38972	JINESH_BLEBBISHIELD_TO_IMMUNE_CELL_FUSION_PBSHMS_UP	C2:CGP: Chemical and Genetic Perturbations	8.339e-10	7.774e-06	5.553e-08	5.396e-07	27	382	CPA4,TPM1,ACTA2,ACTG2,TRIM22,TUBB3,KIAA1549L,UPK3A,ALDH1A3,PLS3,PODXL,CDC42EP3,DKK1,LIMCH1,DKK3,MYADM,MYLK,SPOCK1,GBP1,NUAK1,TAGLN,CTXN1,KRT7,SASH1,DUSP4,ENTPD3,CDH2
Coexpression Atlas	Facebase_RNAseq_e10.5_Olfactory Pit_2500_K2	FacebaseRNAseq_e10.5_Olfactory Pit_top-relative-expression-ranked_2500_k-means-cluster#2	FaceBase_RNAseq	8.775e-10	3.44e-06	1.339e-08	1.185e-07	41	659	TTYH1,MAP2,MEIS2,TUBB3,KIAA1549L,UBE2H,CSRNP3,SEMA5B,PCDH10,MGAT5B,IGLON5,COL8A1,STARD4,SEPTIN5,POGK,WNT7A,DPYSL4,ZNF43,SCMH1,NSG1,CCP110,NCAM2,TUBB2B,BRINP1,DCX,TUBA1A,SYT11,STMN3,ASTN2,SGCE,NNAT,WNK2,DPYSL3,DTNA,MAMLD1,TAMALIN,GPR137C,PAK3,TOX2,SENP7,EPHA3
Coexpression	M2580	LIM_MAMMARY_LUMINAL_MATURE_DN	C2:CGP: Chemical and Genetic Perturbations	8.796e-10	8.2e-06	5.816e-08	5.651e-07	14	94	NREP,MEIS2,FABP5,FZD1,MAP4K4,LTBP4,COL4A1,SFRP1,MOXD1,HTRA1,CYRIA,NFIB,CALD1,TLE4
Coexpression	M1124	MCBRYAN_PUBERTAL_TGFB1_TARGETS_UP	C2:CGP: Chemical and Genetic Perturbations	8.917e-10	8.312e-06	5.854e-08	5.688e-07	18	168	TPM2,ACTA2,ACTG2,PICALM,FABP5,FHL1,CNN1,COL8A1,FN1,TNC,DKK3,HTRA1,MARCKSL1,NFIB,TAGLN,DPYSL3,CALD1,EGR2
Coexpression	M41755	XIE_ST_HSC_S1PR3_OE_UP	C2:CGP: Chemical and Genetic Perturbations	9.007e-10	8.396e-06	5.871e-08	5.705e-07	19	189	MAP2,CSMD3,MYL9,FOXC2,COL6A3,SEPTIN5,SP110,IFIT1,MOXD1,ISG15,IFI6,SAMD9,GATA3,GBP1,SLFN5,IFI44L,HMCN1,LY6E,UBASH3B
Coexpression Atlas	gudmap_kidney_adult_JuxtaGlom_Ren1_Captopr_k2_500	kidney_adult_JuxtaGlom_Ren1_Captopr_k-means-cluster#2_top-relative-expression-ranked_500	Gudmap Mouse MOE430.2	9.067e-10	3.554e-06	1.378e-08	1.219e-07	13	65	TPM2,ACTA2,MYL9,PLN,CNN1,RGS5,SNCG,MYH11,CCDC3,KCNMB1,TAGLN,CACNA1C,EDNRA
Coexpression	M39261	HU_FETAL_RETINA_AMACRINE	C8: Cell Type Signature	9.135e-10	8.516e-06	5.914e-08	5.747e-07	12	64	MAP2,NREP,MEIS2,RND3,TUBB2B,MARCKSL1,SYT1,NNAT,STMN1,TFAP2A,INA,RBFOX2
Coexpression Atlas	gudmap_developingGonad_e16.5_epididymis_500	DevelopingGonad_e16.5_epididymis_emap-29702_top-relative-expression-ranked_500	Gudmap Mouse MOE430.2	9.158e-10	3.59e-06	1.386e-08	1.227e-07	31	406	TPM1,PENK,MEIS2,PCDH10,LTBP4,MEX3B,SFRP1,CHODL,SFSWAP,MOXD1,ZNF43,SCMH1,PRKG1,INHBA,DOCK11,GAS1,RBM26,AIF1L,GDF10,RBMS3,NFIB,NRK,SGCE,DPYSL3,CALD1,GSK3B,EDNRA,TGFB2,KATNBL1,R3HDM1,EPHA3
Coexpression Atlas	gudmap_developingLowerUrinaryTract_e14.5_ urethra_1000_k1	DevelopingLowerUrinaryTract_e14.5_ urethra_emap-30892_k-means-cluster#1_top-relative-expression-ranked_1000	Gudmap Mouse MOE430.2	9.411e-10	3.689e-06	1.419e-08	1.256e-07	15	92	TRAF5,ACTA2,ACTG2,TENM2,CNN1,CAP2,OSR1,PDE5A,DKK3,MYH11,MYLK,CYRIA,NRK,ADAMTS5,MSRB3
Coexpression Atlas	gudmap_dev gonad_e13.5_M_InterstitTestis_Sma_k1_500	dev gonad_e13.5_M_InterstitTestis_Sma_k-means-cluster#1_top-relative-expression-ranked_500	Gudmap Mouse ST 1.0	9.52e-10	3.732e-06	1.43e-08	1.266e-07	19	156	VGLL3,ACTA2,LTBP4,COL6A3,OLFML2B,SOSTDC1,LRRN3,DKK1,PDE5A,ATP2B4,ARHGAP24,INHBA,BGN,CALD1,ADAMTS5,EDNRA,TGFB2,HMCN1,EPHA3
Coexpression	M4680	DAVICIONI_TARGETS_OF_PAX_FOXO1_FUSIONS_UP	C2:CGP: Chemical and Genetic Perturbations	9.965e-10	9.289e-06	6.406e-08	6.225e-07	22	258	FABP5,FZD1,FBN2,ARHGAP29,FST,MAP4K4,ID3,AKAP12,DKK1,DKK2,ADAM19,INHBA,GAS1,GATA2,DCX,SEPTIN6,CYRIA,SULF1,ADAMTS5,SMAD1,TPBG,EPHA3
Coexpression	MM1328	LIM_MAMMARY_LUMINAL_MATURE_DN	M2:CGP: Chemical and Genetic Perturbations	1.016e-09	9.467e-06	6.484e-08	6.301e-07	14	95	NREP,MEIS2,FABP5,FZD1,MAP4K4,LTBP4,COL4A1,SFRP1,MOXD1,HTRA1,CYRIA,NFIB,CALD1,TLE4
Coexpression Atlas	gudmap_dev gonad_e13.5_F_gudmap_devVascOvary_Flk_1000	dev gonad_e13.5_F_DevVascOvary_Flk_top-relative-expression-ranked_1000	Gudmap Mouse ST 1.0	1.102e-09	4.32e-06	1.649e-08	1.459e-07	47	831	PDE4D,RAMP2,RHOJ,MCAM,HLX,RFTN2,NREP,ARHGAP31,ARHGAP29,FST,MAP4K4,FKBP1A,COL4A1,JCAD,BIN1,STARD4,PODXL,CDC42EP3,CRIP2,CRMP1,SMTN,ARHGDIB,IGFBP7,CYYR1,LIMCH1,SNCG,ATP2B4,H19,ADAM19,DOCK11,TUBB2B,SLFN5,NFIB,ARHGEF9,ST8SIA4,DPYSL3,ZEB1,SASH1,UACA,LCP1,TAMALIN,MSRB3,KATNBL1,HMCN1,EGR2,TJP1,PLEKHO1
Coexpression	M45798	HE_LIM_SUN_FETAL_LUNG_C7_PROLIFERATING_SCHWANN_CELL	C8: Cell Type Signature	1.172e-09	1.092e-05	7.43e-08	7.22e-07	48	1053	VGLL3,RHOJ,E2F7,HMMR,MYL9,ANLN,EVA1A,RAD54B,FST,LTBP4,HSPA2,CNN1,COL4A1,COL9A1,LMF1,CEP85,FN1,TNC,OLFML2B,SOSTDC1,STIL,SP110,IFIT1,SCUBE2,IGFBP7,GLIPR2,UHRF1,LIMCH1,CTNS,IFI6,HTRA1,B4GALNT1,GBP1,LAMP5,MELK,BGN,OLFML2A,NTM,BUB1,SGCE,KCNMB4,THAP9-AS1,ADAMTS8,CDCA8,LPAR1,FRMD6,TLL2,ARHGAP19
GO: Cellular Component	GO:0062023	collagen-containing extracellular matrix		1.181e-09	7.559e-07	2.52e-07	1.774e-06	36	532	ACTA2,FBN2,PKM,LTBP4,COL4A1,COL6A3,COL8A1,COL9A1,COL9A2,SFRP1,COL12A1,COL13A1,FN1,TNC,APLP1,CCDC80,POSTN,IGFBP7,CCN2,PRSS2,HTRA1,ADAM19,GDF10,BGN,COL24A1,SULF1,GPC2,GPC1,ADAMTS8,ADAMTS5,TGFB2,THBS2,HMCN1,LTBP2,GREM1,CDH2
GO: Biological Process	GO:0007423	sensory organ development		1.209e-09	6.92e-06	2.336e-07	2.156e-06	59	1178	EPHB2,EYA4,RHOJ,CADM4,MEIS2,FABP5,FBN2,ALDH1A3,SLITRK6,FST,KIF17,FOXC1,FOXC2,COL4A1,COL8A1,SFRP1,FN1,WNT7A,WT1,NKD1,DKK1,IGFBP7,CELF1,OSR1,UHRF1,CTNS,ATP2B4,MIAT,DKK3,DKK2,MYCL,INHBA,GAS1,GATA2,GATA3,FJX1,MARCKSL1,MEIS3,DCX,SULF1,NFIB,NECTIN1,MAFB,DLX2,TMEM231,CACNA1C,DDR1,ZEB1,CAMK2G,TFAP2A,EDNRA,NCS1,ZNF503,MSRB3,TGFB2,TBX18,SOX21,PBX3,CDH2
GO: Biological Process	GO:0040007	growth		1.224e-09	7.007e-06	2.336e-07	2.156e-06	68	1461	CDKN2A,PDE4D,MAP2,HLX,HMMR,NDRG3,PICALM,SEMA5B,HOXD11,ARIH2,PKM,SLITRK6,FHL1,LTBP4,FOXC1,WDR48,FOXC2,TRIM46,SEMA3F,ISLR2,COL6A3,LRP12,COL9A1,SFRP1,FN1,TNC,NLGN4Y,WNT7A,TUBB,WT1,STIL,CRABP2,AKAP12,POSTN,NKD1,DKK1,TAF9B,IGFBP7,CELF1,GIGYF2,PRKG1,DCBLD2,PRSS2,SPOCK1,INHBA,GAS1,GAS2,GATA3,PARD6G,DCX,PTHLH,NRK,SYT1,WASF1,HDGFL2,CACNA1C,DDR1,RGS4,GSK3B,EDNRA,TGFB2,SEMA3D,TLL2,GREM1,LY6E,CDH2,SMAD1,TPBG
Coexpression	MM457	LAZARO_GENETIC_MOUSE_MODEL_HIGH_GRADE_SMALL_CELL_NEUROENDOCRINE_LUNG_CARCINOMA_DN	M2:CGP: Chemical and Genetic Perturbations	1.241e-09	1.157e-05	7.818e-08	7.597e-07	68	1809	TRAF5,VGLL3,RAMP2,MAP2,RHOJ,BACH2,MCAM,MCC,HLX,RFTN2,ABCA9,TUBB4A,KIAA1549L,PGAP1,ARHGAP29,AMOTL2,FHL1,LTBP4,COL4A1,SEMA3F,JCAD,COL6A3,PODXL,ID3,SP110,CDC42EP3,CRIP2,ARL4D,ARHGDIB,SCUBE2,ZNF43,DLL3,CYYR1,PDE5A,IL17RD,MIAT,MYADM,HTRA1,ADAM19,MYLK,GATA2,GATA3,GBP1,SLFN5,DCX,FBXL7,OLFML1,SYT11,STMN3,BUB1,TAGLN,ST8SIA4,CTXN1,SASH1,ADAMTS8,ACTR3B,LCP1,NCS1,RFWD3,MSRB3,PIANP,HMCN1,TJP1,CCBE1,SLC7A5,TNF…
Coexpression	M3645	DELYS_THYROID_CANCER_UP	C2:CGP: Chemical and Genetic Perturbations	1.282e-09	1.195e-05	7.979e-08	7.753e-07	29	445	MAP2,TRIM29,TRIM22,PKM,ALDH1A3,MMP11,MAP4K4,SDC1,SEMA3F,COL8A1,COL13A1,FN1,TNC,CRABP2,ARHGDIB,PDE5A,PRSS2,SPOCK1,INHBA,FJX1,DPYSL3,NT5E,DUSP4,THBS2,SLC7A5,LY6E,PBX3,CDH2,ARHGAP19
Coexpression	M39321	CUI_DEVELOPING_HEART_VASCULAR_ENDOTHELIAL_CELL	C8: Cell Type Signature	1.284e-09	1.197e-05	7.979e-08	7.753e-07	19	193	TRIM22,MEIS2,LTBP4,SEMA3F,SFRP1,RGS5,CDC42EP3,IGFBP7,IFI6,DKK2,HTRA1,GATA2,AIF1L,BGN,SULT1E1,SULF1,KCNMB1,SLC7A8,LTBP2
Coexpression Atlas	PCBC_ctl_BronchSmoothMuscl_1000	Progenitor-Cell-Biology-Consortium_reference_BronchSmoothMuscl_top-relative-expression-ranked_1000	PCBC	1.291e-09	5.059e-06	1.924e-08	1.703e-07	52	981	CPA4,TPM2,CDKN2A,VGLL3,PENK,ABCA9,EVA1A,SLITRK6,FST,COL6A3,COL8A1,SFRP1,COL12A1,FN1,SGCD,OLFML2B,CCDC80,SMTN,RND3,POSTN,MOXD1,OSR1,PDE5A,DKK3,DKK2,SERPINB7,MYLK,P4HA3,NCAM2,SLFN5,GDF10,BGN,OLFML1,SULF1,SHANK1,GLIPR1,ZEB1,UACA,NT5E,MAMLD1,PSCA,ADAMTS5,LPAR1,RGS4,TTLL7,THBS2,LMNA,FRMD6,CCBE1,LTBP2,GREM1,TOX2
Coexpression Atlas	Facebase_RNAseq_e10.5_Neural Epithelium Overlying Central Eminence_2500_K3	FacebaseRNAseq_e10.5_Neural Epithelium Overlying Central Eminence_top-relative-expression-ranked_2500_k-means-cluster#3	FaceBase_RNAseq	1.3e-09	5.097e-06	1.931e-08	1.709e-07	49	893	EPHB2,TTYH1,MAP2,TUBB3,KIAA1549L,CSRNP3,SEMA5B,CPT1C,PCDH10,LTBP4,MGAT5B,IGLON5,COL8A1,POGK,WNT7A,DPYSL4,APLP1,CRMP1,RND3,TAF9B,ZNF43,NCAM2,TUBB2B,FJX1,BRINP1,DCX,TUBA1A,SYT11,SULF1,STMN3,ZNF558,ASTN2,SGCE,NNAT,WNK2,NOVA1,SHANK1,DTNA,MAMLD1,GAL3ST4,TAMALIN,SOX21,GPR137C,TJP1,PAK3,TOX2,CDH2,SENP7,EPHA3
Coexpression Atlas	facebase_RNAseq_e14.5_palate_poster_distal_ERK2_WT_2500_K4	facebase_RNAseq_e14.5_palate_poster_distal_ERK2_WT_2500_K4	Gudmap RNAseq	1.311e-09	5.137e-06	1.939e-08	1.716e-07	22	215	TRPC4,ABCA9,MYL9,PLN,COL6A3,COL12A1,OLFML2B,CCDC80,ARHGDIB,IGFBP7,PRKG1,DKK2,MYH11,HTRA1,MYLK,GDF10,BGN,KCNMB1,NT5E,ADAMTS5,MSRB3,C1orf198
Coexpression Atlas	Facebase_RNAseq_e9.5_Facial Mesenchyne_2500_K2	FacebaseRNAseq_e9.5_Facial Mesenchyne_top-relative-expression-ranked_2500_k-means-cluster#2	FaceBase_RNAseq	1.367e-09	5.358e-06	2.014e-08	1.783e-07	40	642	PDE4D,BACH2,RFTN2,FZD1,SLITRK6,COL6A3,COL9A2,SEPTIN5,RGS5,OLFML2B,ZFP14,SP110,POSTN,ARHGDIB,MOXD1,ZKSCAN1,NSG1,OSR1,RASL11B,LIMCH1,ATP2B4,DKK2,BGN,COL24A1,ST6GAL2,OLFML1,NFIB,NRK,ARHGEF9,EXOC6B,MAFB,KAZN,GPC2,GRIN3A,DNMT3A,CACNA1C,KRT7,TFAP2A,SERTAD4,UBASH3B
GO: Biological Process	GO:0003002	regionalization		1.4e-09	8.015e-06	2.516e-07	2.322e-06	48	856	MCAM,ADCY2,MEIS2,HOXD11,PGAP1,FST,FOXC1,FOXC2,SEMA3F,SFRP1,FN1,SGCD,WNT7A,WT1,SOSTDC1,CCDC80,STIL,SCUBE2,NKD1,DKK1,CELF1,SCMH1,DLL3,OSR1,TTC17,IL17RD,GAS1,SEPTIN6,SULF1,MAFB,DLX2,CACNA1C,CALD1,TSC22D3,CAMK2G,GSK3B,EDNRA,TBX18,IFT52,SOX21,EGR2,TLL2,GREM1,PBX3,CDH2,SMAD1,TPBG,EPHA3
Coexpression Atlas	gudmap_developingKidney_e15.5_Pelvic Mesenchyme_1000	DevelopingKidney_e15.5_Pelvic Mesenchyme_emap-8241_top-relative-expression-ranked_1000	Gudmap Mouse MOE430.2	1.42e-09	5.565e-06	2.084e-08	1.845e-07	46	809	TPM2,EYA4,ATXN7L1,PENK,MCM5,ADCY2,FZD1,MYL9,PCDH10,CNTN1,FOXC2,COL9A1,RGS5,SOSTDC1,DPYSL4,POU3F1,CCDC80,CDC42EP3,AKAP12,SCUBE2,CYYR1,GLIPR2,GIGYF2,DKK3,MYLK,GATA2,PARD6G,TUBB2B,DCX,NTM,GRIN3A,TAGLN,GPC1,RGS4,MSRB3,TBX18,THBS2,LMNA,CCBE1,VASH2,SERTAD4,AADAT,LY6H,PBX3,RBFOX2,EPHA3
GO: Biological Process	GO:0048589	developmental growth		1.422e-09	8.143e-06	2.516e-07	2.322e-06	57	1122	PDE4D,MAP2,HLX,HMMR,PICALM,SEMA5B,HOXD11,ARIH2,PKM,SLITRK6,FOXC1,WDR48,FOXC2,TRIM46,SEMA3F,ISLR2,COL6A3,COL9A1,SFRP1,FN1,TNC,NLGN4Y,WNT7A,TUBB,WT1,STIL,CRABP2,AKAP12,POSTN,NKD1,DKK1,CELF1,GIGYF2,PRKG1,INHBA,GAS1,GAS2,GATA3,PARD6G,DCX,PTHLH,NRK,SYT1,WASF1,HDGFL2,CACNA1C,DDR1,RGS4,GSK3B,EDNRA,TGFB2,SEMA3D,TLL2,LY6E,CDH2,SMAD1,TPBG
Coexpression Atlas	gudmap_developingLowerUrinaryTract_P1_ureter_500	DevelopingLowerUrinaryTract_P1_ureter_emap-30363_top-relative-expression-ranked_500	Gudmap Mouse MOE430.2	1.447e-09	5.671e-06	2.116e-08	1.873e-07	30	390	TPM2,VGLL3,PENK,ACTA2,ACTG2,ABCA9,MYL9,PROM2,UPK3A,CNN1,CAP2,COL9A1,RGS5,POSTN,SCUBE2,PDE5A,DKK3,MYH11,MYLK,GBP1,CYRIA,TAGLN,KRT7,NIPAL4,NT5E,MSRB3,TBX18,THBS2,TNFAIP2,RASD2
GO: Biological Process	GO:0002009	morphogenesis of an epithelium		1.45e-09	8.303e-06	2.516e-07	2.322e-06	52	973	EPHB2,MCAM,MCC,MEIS2,FZD1,HOXD11,UPK3A,ALDH1A3,AMOTL2,FST,MRTFA,FOXC1,FOXC2,COL4A1,TEAD2,SFRP1,FN1,TNC,PODXL,WNT7A,WT1,SOSTDC1,STIL,AKAP12,NKD1,DKK1,IGFBP7,OSR1,CTNS,MYH11,ARHGAP24,GATA3,PARD6G,MARCKSL1,PTHLH,SULF1,ASTN2,CACNA1C,DDR1,CALD1,CAMK2G,LCP1,TFAP2A,GSK3B,EDNRA,TGFB2,TBX18,IFT52,GREM1,CDH2,PHLDB2,TPBG
Coexpression	M45680	HE_LIM_SUN_FETAL_LUNG_C0_MID_MESOTHELIAL_CELL	C8: Cell Type Signature	1.452e-09	1.354e-05	8.964e-08	8.711e-07	45	955	TRAF5,TENM2,MEIS2,ARHGAP29,ALDH1A3,AMOTL2,AGAP3,COL8A1,CCDC74B,COL9A2,RGS5,PODXL,OLFML2B,WT1,APLP1,CRABP2,CDC42EP3,NSG1,IL17RD,DCBLD2,HTRA1,DOCK11,NCAM2,TUBB2B,AIF1L,PTHLH,ST6GAL2,ANOS1,SULF1,WASF1,CTXN1,GPC1,DDR1,SASH1,ADAMTS8,ADAMTS5,TGFB2,TBX18,TLE4,LTBP2,LY6H,HSD17B14,CDH2,TPBG,EPHA3
Coexpression Atlas	gudmap_dev lower uro neuro_e15.5_BladdPelvicGanglion_Sox10_k4_1000	dev lower uro neuro_e15.5_BladdPelvicGanglion_Sox10_k-means-cluster#4_top-relative-expression-ranked_1000	Gudmap Mouse ST 1.0	1.484e-09	5.816e-06	2.162e-08	1.914e-07	25	278	EYA4,MAP2,CSMD3,TUBB3,PGAP1,SLITRK6,PCDH10,MRAS,AKAP12,CRMP1,POSTN,GATA3,NCAM2,ZC4H2,DCX,NEFL,CYRIA,SYT11,NRK,SYT1,NOVA1,DPYSL3,RGS4,INA,CDH2
Coexpression Atlas	GSM777059_500	Stromal Cells, LEC.MLN, gp38+ CD31+, Lymph Node, avg-4	Immgen.org, GSE15907	1.541e-09	6.039e-06	2.237e-08	1.98e-07	32	439	RAMP2,RHOJ,MEIS2,ARHGAP29,LTBP4,PLS3,FOXC2,COL4A1,SEMA3F,JCAD,COL12A1,FN1,TNC,PODXL,CRIP2,SMTN,POSTN,IGFBP7,CYYR1,PARD6G,MARCKSL1,GDF10,BGN,FBXL7,NFIB,RGS4,MSRB3,SEMA3D,HMCN1,TJP1,LTBP2,PHLDB2
GO: Biological Process	GO:0030029	actin filament-based process		1.556e-09	8.911e-06	2.621e-07	2.419e-06	52	975	TPM1,TPM2,PDE4D,CTTNBP2,RHOJ,ACTA2,MYL9,ANLN,AMOTL2,PLN,PLS3,CNN1,CAP2,MRTFA,BIN1,SFRP1,MRAS,SGCD,CDC42EP3,SMTN,RND3,ARHGDIB,TBCK,TTC17,CCN2,LIMCH1,PRKG1,MYADM,MYH11,GAS2,MARCKSL1,AIF1L,CYRIA,TAGLN,WASF1,SHANK1,CACNA1C,DPYSL3,CALD1,STMN1,LCP1,LPAR1,RGS4,SDAD1,TGFB2,HMCN1,FRMD6,TJP1,PAK3,EPB41,PHLDB2,EPHA3
Coexpression Atlas	gudmap_kidney_P0_JuxtaGlom_Ren1_k4_200	kidney_P0_JuxtaGlom_Ren1_k-means-cluster#4_top-relative-expression-ranked_200	Gudmap Mouse MOE430.2	1.635e-09	6.408e-06	2.365e-08	2.093e-07	13	68	PENK,ACTA2,ACTG2,MYL9,FHL1,CNN1,FN1,RGS5,MYH11,CCDC3,KCNMB1,TAGLN,EDNRA
Coexpression	M2128	CHICAS_RB1_TARGETS_GROWING	C2:CGP: Chemical and Genetic Perturbations	1.751e-09	1.632e-05	1.074e-07	1.043e-06	21	242	CDKN2A,HMMR,NREP,MEIS2,FABP5,PGAP1,CCDC80,POSTN,UHRF1,MYLK,BGN,RBMS3,SULF1,STMN3,BUB1,DPYSL3,CDCA8,RGS4,LMNA,CCBE1,LTBP2
Coexpression Atlas	Facebase_RNAseq_e8.5_Paraxial Mesoderm_2500_K3	FacebaseRNAseq_e8.5_Paraxial Mesoderm_top-relative-expression-ranked_2500_k-means-cluster#3	FaceBase_RNAseq	1.764e-09	6.915e-06	2.542e-08	2.25e-07	43	730	EPHB2,TTYH1,MAP2,MEIS2,KIAA1549L,UBE2H,CSRNP3,SEMA5B,CPT1C,PCDH10,LTBP4,MGAT5B,IGLON5,COL8A1,STARD4,POGK,WNT7A,DPYSL4,APLP1,ZNF43,SCMH1,NCAM2,TUBB2B,BRINP1,DCX,CYRIA,TUBA1A,SYT11,SULF1,ZNF558,ASTN2,SGCE,WNK2,SHANK1,DDR1,DTNA,MAMLD1,TAMALIN,GPR137C,TLE4,PAK3,SENP7,EPHA3
Coexpression Atlas	PCBC_ratio_MESO-5 amniotic fluid MSC_vs_MESO-5 blastocyst_cfr-2X-p05	MESO-5 amniotic fluid MSC_vs_MESO-5 blastocyst-Confounder_removed-fold2.0_adjp0.05	PCBC_AltAnalyze	1.85e-09	7.253e-06	2.657e-08	2.351e-07	31	418	TTYH1,RAMP2,ACTA2,E2F7,RCBTB2,FZD1,FBN2,CPT1C,FOXC1,COL9A1,ID3,DPYSL4,APLP1,CRIP2,RND3,DKK1,CCN2,H19,TCEAL7,HTRA1,GAS1,FJX1,BGN,OLFML2A,SYT11,NKAIN1,SASH1,PCDHGB6,SLC7A8,TLE4,EPHA3
GO: Cellular Component	GO:0045202	synapse		1.908e-09	1.221e-06	3.053e-07	2.149e-06	79	1855	EPHB2,IGSF8,TTYH1,CTTNBP2,MAP2,ASIC2,PENK,TENM2,ADCY1,PICALM,FABP5,CLCN5,CPT1C,FKBP1A,PLS3,CAP2,CNTN1,BEGAIN,SEMA3F,BIN1,COL13A1,SEPTIN5,NLGN4Y,WNT7A,SLITRK3,AKAP12,POSTN,NSG1,RAB15,SNCG,ATP2B4,SPOCK1,PCDHB5,LAMP5,TUBB2B,MARCKSL1,SYNC,ZC4H2,SEPTIN6,SEPTIN2,NEFL,TUBA1A,SYT11,NTM,NECTIN1,ARHGEF9,KCNMB1,SYT1,KCNMB4,KIF3C,GPC2,GRIN3A,WASF1,RAB6A,SHANK1,GPC1,SLC12A6,CACNA1C,DPYSL3,CALD1,NT5E,DTNA,CAMK…
Coexpression Atlas	gudmap_kidney_adult_Mesangium_Meis_k2_1000	kidney_adult_Mesangium_Meis_k-means-cluster#2_top-relative-expression-ranked_1000	Gudmap Mouse MOE430.2	1.908e-09	7.478e-06	2.729e-08	2.416e-07	28	348	ATXN7L1,TRPC4,MCAM,RFTN2,PICALM,MYL9,COL4A1,TNC,OLFML2B,CDC42EP3,POSTN,PDE5A,CCN2,PRKG1,DCBLD2,DKK2,GATA3,PDE10A,GDF10,BGN,ZEB1,CALD1,NT5E,DTX3,ADAMTS5,RGS4,PHLDB2,EPHA3
Coexpression Atlas	gudmap_developingLowerUrinaryTract_P1_bladder_J_200_k5	DevelopingLowerUrinaryTract_P1_bladder_J_emap-30374_k-means-cluster#5_top-relative-expression-ranked_200	Gudmap Mouse MOE430.2	1.976e-09	7.745e-06	2.816e-08	2.493e-07	13	69	TPM2,ACTA2,ACTG2,MYL9,CNN1,DKK3,MYH11,MYLK,PTHLH,TAGLN,NT5E,MSRB3,THBS2
Coexpression Atlas	gudmap_kidney_P0_JuxtaGlom_Ren1_k2_1000	kidney_P0_JuxtaGlom_Ren1_k-means-cluster#2_top-relative-expression-ranked_1000	Gudmap Mouse MOE430.2	2.012e-09	7.889e-06	2.855e-08	2.527e-07	19	163	TPM1,PICALM,PLS3,OLFML2B,POSTN,IGFBP7,PDE5A,CCN2,PRKG1,DKK2,MYADM,HTRA1,ARHGAP24,MYLK,GATA3,BGN,SGCE,CALD1,MSRB3
Coexpression Atlas	gudmap_dev lower uro neuro_e14.5_BladdPelvicGanglion_Sox10_100	dev lower uro neuro_e14.5_BladdPelvicGanglion_Sox10_top-relative-expression-ranked_100	Gudmap Mouse ST 1.0	2.017e-09	7.909e-06	2.855e-08	2.527e-07	15	97	TUBB3,SLITRK6,CRMP1,POSTN,NSG1,SNCG,GATA3,NEFL,SYT11,STMN3,NRK,SYT1,DPYSL3,RGS4,INA
Coexpression	M2115	VERHAAK_GLIOBLASTOMA_PRONEURAL	C2:CGP: Chemical and Genetic Perturbations	2.079e-09	1.938e-05	1.266e-07	1.231e-06	18	177	TTYH1,MAP2,AMOTL2,CNTN1,DPYSL4,CRMP1,DLL3,MARCKSL1,PDE10A,ZC4H2,DCX,ARHGEF9,NKAIN1,WASF1,STMN1,GSK3B,PAK3,EPB41
Coexpression	M10091	WAMUNYOKOLI_OVARIAN_CANCER_LMP_DN	C2:CGP: Chemical and Genetic Perturbations	2.149e-09	2.003e-05	1.301e-07	1.264e-06	19	199	CAP2,COL8A1,WT1,CCDC80,PREPL,DCBLD2,HTRA1,DOCK11,GAS1,FBXL7,OLFML1,SULF1,DPYSL3,CALD1,TGFB2,C1orf198,IFT52,ZNF532,RBFOX2
Coexpression Atlas	PCBC_ratio_DE_vs_SC_500	ratio_induced-DefinitiveEndoderm_vs_StemCell_top-relative-expression-ranked_500	PCBC	2.167e-09	8.496e-06	3.056e-08	2.705e-07	34	495	DACT2,HLX,TENM2,ARHGAP29,SLITRK6,AMOTL2,PCDH10,FOXC1,TOM1L2,JCAD,COL9A2,FN1,TNC,WT1,ARL4D,DKK1,GLIPR2,DKK3,ARHGAP24,ADAM19,GATA3,MEIS3,PDE10A,PTHLH,OLFML1,RBMS3,CCDC3,TAGLN,ST8SIA4,ADAMTS5,ZNF503,SERTAD4,GREM1,CDH2
Coexpression Atlas	gudmap_developingKidney_e15.5_Peripheral blastema_500	DevelopingKidney_e15.5_Peripheral blastema_emap-27731_top-relative-expression-ranked_500	Gudmap Mouse MOE430.2	2.196e-09	8.609e-06	3.086e-08	2.731e-07	31	421	VGLL3,EYA4,PENK,E2F7,MCM5,ADCY2,FBN2,CSRNP3,ANLN,UBE2E3,FOXC1,FOXC2,COL8A1,SFRP1,COL12A1,CDC42EP3,DKK1,DOCK11,GAS2,PDE10A,SULT1E1,COL24A1,NTM,CCDC3,NOVA1,GAL3ST4,ADAMTS5,SEMA3D,EGR2,SERTAD4,CDH2
Coexpression Atlas	facebase_RNAseq_e10.5_NeuroEpith_central_2500_K4	facebase_RNAseq_e10.5_NeuroEpith_central_2500_K4	Gudmap RNAseq	2.236e-09	8.767e-06	3.131e-08	2.771e-07	64	1370	EPHB2,TTYH1,MAP2,BACH2,E2F7,HMMR,REEP2,SBK1,TUBB4A,KIAA1549L,SEMA5B,PGAP1,RAD54B,AMOTL2,FHL1,IGLON5,CEP85,WNT7A,DPYSL4,APLP1,STIL,CRMP1,RND3,TAF9B,ZNF43,UHRF1,IL17RD,CCP110,RBM26,TUBB2B,FJX1,DCX,MELK,GGA3,NEFL,ST6GAL2,NUAK1,TUBA1A,SYT11,SULF1,STMN3,BUB1,ZNF558,SGCE,NKAIN1,ST8SIA4,WNK2,NOVA2,SHANK1,ZEB1,DTNA,CNTRL,MAMLD1,TAMALIN,TLE4,PAK3,PWWP3B,PBX3,PSPC1,TOX2,CDH2,PLEKHO1,EPB41,SENP7
Coexpression	M10165	TURASHVILI_BREAST_LOBULAR_CARCINOMA_VS_DUCTAL_NORMAL_UP	C2:CGP: Chemical and Genetic Perturbations	2.268e-09	2.114e-05	1.364e-07	1.325e-06	12	69	COL6A3,COL8A1,COL12A1,FN1,POSTN,INHBA,BGN,SULF1,ZEB1,PLXDC1,EDNRA,THBS2
Coexpression Atlas	PCBC_ratio_MESO-5_vs_SC_cfr-2X-p05	Mesoderm Day 5_vs_Pluripotent Stem Cells-Confounder_removed-fold2.0_adjp0.05	PCBC_AltAnalyze	2.52e-09	9.878e-06	3.515e-08	3.111e-07	57	1153	EPHB2,TRAF5,DACT2,MCAM,MCC,PLPPR3,FBN2,MYL9,PKM,AMOTL2,FST,PCDH10,CNN1,CAP2,FOXC1,COL4A1,SEMA3F,JCAD,KLF11,LRP12,COL9A2,COL13A1,FN1,TNC,CRABP2,ARL4D,DKK1,ISG15,GLIPR2,ATP2B4,MYADM,ARHGAP24,ADAM19,SPOCK1,GATA3,FJX1,MEIS3,PDE10A,DENND2B,OLFML2A,NUAK1,DDHD2,TAGLN,ST8SIA4,PCBP4,CTXN1,DTNA,DUSP4,EDNRA,NBPF15,SLC7A5,LY6E,AADAT,HSD17B14,CDH2,PHLDB2,TPBG
Coexpression	M19467	SANA_TNF_SIGNALING_DN	C2:CGP: Chemical and Genetic Perturbations	2.523e-09	2.352e-05	1.508e-07	1.465e-06	13	85	RHOJ,CRIP2,POSTN,ARHGDIB,CCN2,BGN,NFIB,DDR1,KRT7,SASH1,NT5E,RGS4,CDK2AP1
Coexpression Atlas	BM Top 100 - nipple cross-section	BM Top 100 - nipple cross-section	Body Map	2.545e-09	9.976e-06	3.538e-08	3.131e-07	14	84	TPM2,ACTA2,ACTG2,TRIM29,MYL9,PLN,SDC1,CNN1,COL6A3,LYPD3,MYH11,GATA3,TAGLN,TFAP2A
Coexpression Atlas	Facebase_RNAseq_e9.5_Facial Mesenchyne_1000_K4	FacebaseRNAseq_e9.5_Facial Mesenchyne_top-relative-expression-ranked_1000_k-means-cluster#4	FaceBase_RNAseq	2.61e-09	1.023e-05	3.615e-08	3.199e-07	22	223	TTYH1,MEIS2,KIAA1549L,SEMA5B,LTBP4,IGLON5,COL8A1,DPYSL4,APLP1,IGFBP7,ZNF43,NCAM2,DCX,ST6GAL2,ASTN2,WNK2,SHANK1,DTNA,MAMLD1,THBS2,SENP7,EPHA3
GO: Biological Process	GO:0010975	regulation of neuron projection development		2.717e-09	1.556e-05	4.446e-07	4.103e-06	40	650	EPHB2,MAP2,CSMD3,PICALM,FZD1,SEMA5B,MAP4K4,CNTN1,TRIM46,SEMA3F,ISLR2,SFRP1,COL12A1,FN1,CHODL,TNC,WNT7A,CRABP2,CRMP1,DKK1,SPOCK1,GATA3,PARD6G,TUBB2B,DCX,NEFL,NTM,KIF3C,GPC2,NOVA2,DDR1,DPYSL3,CAMK2G,LPAR1,GSK3B,NCS1,SEMA3D,PAK3,CDH2,EPHA3
Coexpression Atlas	gudmap_developingLowerUrinaryTract_e13.5_bladder mesenchyme_200	DevelopingLowerUrinaryTract_e13.5_bladder mesenchyme_emap-3087_top-relative-expression-ranked_200	Gudmap Mouse MOE430.2	2.74e-09	1.074e-05	3.782e-08	3.347e-07	19	166	TPM1,VGLL3,MCC,ACTG2,SLITRK6,CNN1,RND3,PDE5A,DCBLD2,DKK3,MYH11,GBP1,C11orf87,BRINP1,SULF1,MSRB3,TBX18,EGR2,CDH2
Coexpression Atlas	Facebase_ST1_e11.5_Emin_MedNasl_SingCel_250	e11.5_Emin_MedNasl_SingCel_top-relative-expression-ranked_250	FaceBase_ST1	3.057e-09	1.198e-05	4.205e-08	3.722e-07	21	205	RHOJ,PLPPR3,NREP,MMP11,FST,FOXC1,FOXC2,COL9A1,RGS5,CDC42EP3,ARHGDIB,DKK1,IGFBP7,GATA2,GATA3,P4HA3,BGN,NFIB,TGFB2,NARF,HMCN1
Coexpression	MM993	MCBRYAN_PUBERTAL_TGFB1_TARGETS_UP	M2:CGP: Chemical and Genetic Perturbations	3.252e-09	3.032e-05	1.924e-07	1.869e-06	18	182	TPM2,ACTA2,ACTG2,PICALM,FABP5,FHL1,CNN1,COL8A1,FN1,TNC,DKK3,HTRA1,MARCKSL1,NFIB,TAGLN,DPYSL3,CALD1,EGR2
Coexpression	M2581	DURAND_STROMA_S_UP	C2:CGP: Chemical and Genetic Perturbations	3.26e-09	3.039e-05	1.924e-07	1.869e-06	23	300	EYA4,PDE4D,BACH2,EHD3,FZD1,SEMA3F,PODXL,CCDC80,CRIP2,POSTN,TAF9B,B4GALNT1,ADAM19,GAS2,GATA3,NOVA1,DPYSL3,TSC22D3,TFAP2A,LPAR1,RGS4,LTBP2,UBASH3B
Coexpression Atlas	gudmap_dev gonad_e13.5_F_VascAssocMesenchStromOvary_Sma_k4_1000	dev gonad_e13.5_F_VascAssocMesenchStromOvary_Sma_k-means-cluster#4_top-relative-expression-ranked_1000	Gudmap Mouse ST 1.0	3.352e-09	1.314e-05	4.595e-08	4.067e-07	19	168	RHOJ,ACTA2,MCC,LTBP4,COL6A3,SFRP1,FN1,SGCD,OLFML2B,ATP2B4,INHBA,P4HA3,BGN,ZEB1,CALD1,EDNRA,TGFB2,HMCN1,EPHA3
Coexpression Atlas	Facebase_RNAseq_e10.5_Neural Epithelium Overlying Medial Eminence_1000	FacebaseRNAseq_e10.5_Neural Epithelium Overlying Medial Eminence_top-relative-expression-ranked_1000	FaceBase_RNAseq	3.386e-09	1.327e-05	4.625e-08	4.094e-07	51	979	TTYH1,MAP2,TENM2,REEP2,EHD3,TUBB3,TUBB4A,SEMA5B,PCDH10,MGAT5B,RBM38,PCYT1B,WNT7A,DPYSL4,POU3F1,CRMP1,RND3,ISG15,DLL3,SNRPN,MYCL,CCP110,TUBB2B,MEIS3,DCX,SYT11,STMN3,DLX2,NNAT,PCBP4,WNK2,NOVA1,GPC1,ZNF704,DDR1,DPYSL3,ZEB1,DTNA,MAMLD1,GAL3ST4,CBFA2T3,LCP1,NCS1,MRPL4,SOX21,INA,FRMD6,GPR137C,PAK3,TOX2,CDH2
Coexpression Atlas	PCBC_ratio_SC_vs_MESO-15_cfr-2X-p05	Pluripotent Stem Cells_vs_Mesoderm Day 15-Confounder_removed-fold2.0_adjp0.05	PCBC_AltAnalyze	3.458e-09	1.356e-05	4.707e-08	4.166e-07	81	1955	IGSF8,TTYH1,TRAF5,E2F7,CHST6,MCM5,HSPBP1,HMMR,TRIM22,REEP2,ADCY2,FABP5,SBK1,TUBB3,SEMA5B,CPT1C,RAD54B,FHL1,RBM38,PCYT1B,TEAD2,COL9A1,SFRP1,CEP85,PODXL,TUBB,STIL,CRMP1,CELF1,ZFP64,NSG1,ITPRIP,RAB15,IL17RD,SNRPN,MIAT,FAM131B,MYCL,TCEAL7,TUBB2B,BRINP1,AIF1L,MELK,ANOS1,TSPAN17,TUBA1A,STMN3,NECTIN1,BUB1,ARHGEF9,SYT1,NKAIN1,KIF3C,GPC2,RHNO1,CTXN1,DPYSL3,DTX3,SAE1,STMN1,ACTR3B,CDCA8,SDAD1,RFWD3,LSM12,SL…
Coexpression Atlas	gudmap_developingLowerUrinaryTract_e14.5_ bladder_500_k2	DevelopingLowerUrinaryTract_e14.5_ bladder_emap-30872_k-means-cluster#2_top-relative-expression-ranked_500	Gudmap Mouse MOE430.2	3.501e-09	1.372e-05	4.732e-08	4.189e-07	14	86	ACTA2,ACTG2,CNN1,PDE5A,DKK3,MYH11,MYLK,GBP1,CYRIA,NFIB,NIPAL4,CALD1,ACTR3B,MSRB3
Coexpression Atlas	gudmap_developingKidney_e15.5_Podocyte cells_500_k5	DevelopingKidney_e15.5_Podocyte cells_emap-27915_k-means-cluster#5_top-relative-expression-ranked_500	Gudmap Mouse MOE430.2	3.501e-09	1.372e-05	4.732e-08	4.189e-07	14	86	PENK,ACTG2,CNTN1,COL9A1,POU3F1,DKK3,MYH11,MYLK,GBP1,GDF10,CYRIA,TTLL7,TBX18,EPHA3
Coexpression	M2001	WU_CELL_MIGRATION	C2:CGP: Chemical and Genetic Perturbations	3.55e-09	3.309e-05	2.081e-07	2.023e-06	18	183	TPM2,TRIM29,FABP5,ARHGAP29,COL4A1,FN1,PODXL,AKAP12,ARHGDIB,IGFBP7,LIMCH1,DCBLD2,DKK3,GATA3,GLIPR1,KRT7,LPAR1,TNFAIP2
Coexpression	M1459	PETROVA_ENDOTHELIUM_LYMPHATIC_VS_BLOOD_DN	C2:CGP: Chemical and Genetic Perturbations	3.611e-09	3.366e-05	2.104e-07	2.045e-06	17	162	TPM1,TPM2,ACTA2,TRIM22,CAP2,COL8A1,CDC42EP3,ARHGDIB,DKK1,ISG15,BGN,NUAK1,TAGLN,KRT7,RGS4,LTBP2,CDH2
Coexpression Atlas	facebase_RNAseq_e14.5_palate_poster_nasal_Tgfbr2_WT_2500_K2	facebase_RNAseq_e14.5_palate_poster_nasal_Tgfbr2_WT_2500_K2	Gudmap RNAseq	3.695e-09	1.448e-05	4.978e-08	4.406e-07	59	1228	TPM1,IGSF8,TPM2,TTYH1,EYA4,MAP2,RFTN2,NREP,FZD1,FBN2,CPT1C,MMP11,LTBP4,CNN1,PDZD4,TRIM46,JCAD,MRAS,FN1,SEPTIN5,WNT7A,SOSTDC1,ZFP14,APLP1,SHF,NKD1,DKK1,MANBAL,NSG1,RASL11B,ATP2B4,DKK3,H19,ARHGAP24,INHBA,P4HA3,ST6GAL2,CYRIA,FBXL7,NUAK1,OLFML1,RBMS3,NFIB,STMN3,NRK,MAFB,SHANK1,GPC1,CACNA1C,CALD1,TGFB2,SEMA3D,LMNA,HMCN1,FRMD6,SERTAD4,PAK3,PWWP3B,PHLDB2
Coexpression	MM1131	GOTZMANN_EPITHELIAL_TO_MESENCHYMAL_TRANSITION_UP	M2:CGP: Chemical and Genetic Perturbations	3.771e-09	3.515e-05	2.183e-07	2.122e-06	12	72	ACTA2,COL4A1,TEAD2,FN1,TNC,IGFBP7,CCN2,INHBA,GATA2,LY6H,CDH2,SMAD1
Coexpression	M12602	WOO_LIVER_CANCER_RECURRENCE_UP	C2:CGP: Chemical and Genetic Perturbations	3.895e-09	3.631e-05	2.241e-07	2.178e-06	14	105	TPM2,FZD1,PKM,COL6A3,COL9A2,POSTN,CCN2,ANOS1,DDR1,DPYSL3,DUSP4,TGFB2,TPBG,EPHA3
Coexpression Atlas	BM Top 100 - coronary artery	BM Top 100 - coronary artery	Body Map	4.083e-09	1.6e-05	5.481e-08	4.851e-07	13	73	TPM1,TPM2,ACTA2,ACTG2,MYL9,PLN,CNN1,COL6A3,CCDC80,H19,MYH11,BGN,TAGLN
Coexpression Atlas	Facebase_RNAseq_e9.5_Facial Mesenchyne_1000_K3	FacebaseRNAseq_e9.5_Facial Mesenchyne_top-relative-expression-ranked_1000_k-means-cluster#3	FaceBase_RNAseq	4.151e-09	1.627e-05	5.554e-08	4.916e-07	29	384	PDE4D,ADCY2,SLITRK6,FOXC1,COL6A3,COL9A2,MRAS,CHODL,RGS5,TNC,OLFML2B,SP110,POSTN,OSR1,LIMCH1,ATP2B4,DKK2,INHBA,P4HA3,LAMP5,BGN,COL24A1,OLFML1,NFIB,NRK,CCDC3,CACNA1C,KRT7,TFAP2A
GO: Biological Process	GO:0007417	central nervous system development		4.17e-09	2.388e-05	6.632e-07	6.122e-06	72	1637	EPHB2,CTTNBP2,MAP2,ASIC2,TRPC4,ADCY1,MEIS2,SBK1,FZD1,PGAP1,ALDH1A3,FST,MRTFA,CNTN1,FOXC1,COL4A1,SEMA3F,BIN1,SFRP1,FN1,NLGN4Y,WNT7A,ID3,POU3F1,APLP1,STIL,CRABP2,WDR47,DKK1,CELF1,DLL3,GIGYF2,PRKG1,CTNS,ATP2B4,SPOCK1,INHBA,GAS1,GATA2,GATA3,PARD6G,TUBB2B,MARCKSL1,BRINP1,MEIS3,ZC4H2,GDF10,DCX,NEFL,TUBA1A,SULF1,NFIB,SYT1,MAFB,DLX2,NNAT,NOVA2,ZEB1,PLXDC1,TSC22D3,TFAP2A,LPAR1,RGS4,GSK3B,ZNF503,SEMA3D,INA…
Coexpression	M39039	FAN_EMBRYONIC_CTX_BRAIN_ENDOTHELIAL_1	C8: Cell Type Signature	4.194e-09	3.91e-05	2.386e-07	2.319e-06	28	440	RAMP2,RHOJ,RFTN2,ARHGAP29,FKBP1A,PLS3,FOXC1,JCAD,FN1,PODXL,ID3,IFIT1,CRIP2,SMTN,IGFBP7,ISG15,CYYR1,IFI6,AIF1L,IFI44L,MSRB3,SLC7A8,HMCN1,TJP1,SLC7A5,LY6E,CDH2,SMAD1
Coexpression	M39113	AIZARANI_LIVER_C9_LSECS_1	C8: Cell Type Signature	4.198e-09	3.913e-05	2.386e-07	2.319e-06	23	304	RHOJ,MCAM,EHD3,ARHGAP29,FHL1,FKBP1A,COL4A1,AKAP12,SMTN,IGFBP7,ITPRIP,LIMCH1,CNTNAP3B,MYADM,MARCKSL1,NUAK1,IFI44L,NOVA2,ZEB1,SASH1,UACA,SLC7A8,TOX2
Coexpression Atlas	Facebase_RNAseq_e10.5_Neural Epithelium Overlying Central Eminence_1000	FacebaseRNAseq_e10.5_Neural Epithelium Overlying Central Eminence_top-relative-expression-ranked_1000	FaceBase_RNAseq	4.294e-09	1.683e-05	5.726e-08	5.068e-07	51	986	TTYH1,PDE4D,MAP2,BACH2,REEP2,TUBB3,TUBB4A,KIAA1549L,CSRNP3,SEMA5B,MGAT5B,IGLON5,RBM38,COL9A2,POU3F1,APLP1,CRMP1,RND3,TAF9B,DLL3,IL17RD,SNRPN,MYCL,TUBB2B,FJX1,DCX,MELK,ST6GAL2,SYT11,SULF1,STMN3,BUB1,ZNF558,ASTN2,MAFB,DLX2,NNAT,WNK2,NOVA1,DTNA,MAMLD1,GAL3ST4,SOX21,INA,GPR137C,TJP1,PAK3,TOX2,CDH2,EPB41,SENP7
Coexpression	M10961	GOZGIT_ESR1_TARGETS_DN	C2:CGP: Chemical and Genetic Perturbations	4.561e-09	4.252e-05	2.577e-07	2.504e-06	39	785	MAP2,NREP,ADCY1,SLITRK6,PCDH10,CAP2,CNTN1,TOM1L2,TEAD2,SESN3,CRABP2,SP110,IFIT1,RND3,SCUBE2,DKK1,IFI6,SAMD9,GATA3,NCAM2,NUAK1,TUBA1A,SULF1,STMN3,SYT1,IFI44L,ST8SIA4,SLC12A6,TSC22D3,DTNA,PCDHB10,TGFB2,LMNA,HMCN1,FRMD6,GPR137C,LTBP2,RBFOX2,EPHA3
Coexpression Atlas	gudmap_developingGonad_e11.5_testes and mesonephros_500	DevelopingGonad_e11.5_testes and mesonephros_emap-3226_top-relative-expression-ranked_500	Gudmap Mouse MOE430.2	4.781e-09	1.874e-05	6.353e-08	5.623e-07	31	435	RAMP2,BACH2,HMMR,CNOT6,SBK1,TUBB3,FKBP1A,MEX3B,SFRP1,SFSWAP,DPYSL4,APLP1,CRABP2,CRMP1,DLL3,SNRPN,GAS1,RBM26,TUBB2B,NEFL,SYT11,NNAT,PCBP4,CTXN1,DPYSL3,CALD1,CAMK2G,GSK3B,PSME3,RBFOX2,EPHA3
Coexpression	MM1051	SWEET_LUNG_CANCER_KRAS_DN	M2:CGP: Chemical and Genetic Perturbations	4.866e-09	4.536e-05	2.733e-07	2.655e-06	28	443	RAMP2,RHOJ,ACTA2,MYL9,FHL1,LTBP4,CNTN1,COL13A1,ID3,AKAP12,POSTN,LIMCH1,MYH11,GBP1,DENND2B,TUBA1A,NFIB,STMN3,BUB1,TAGLN,ST8SIA4,ZEB1,SASH1,MSANTD3-TMEFF1,TJP1,SLC7A5,LY6H,EPB41
Coexpression Atlas	gudmap_dev lower uro neuro_e15.5_PelvicGanglion_Sox10_k1_1000	dev lower uro neuro_e15.5_PelvicGanglion_Sox10_k-means-cluster#1_top-relative-expression-ranked_1000	Gudmap Mouse ST 1.0	5.142e-09	2.016e-05	6.795e-08	6.015e-07	21	211	CSMD3,TUBB3,PCDH10,CRMP1,SNRPN,GATA3,P4HA3,TUBB2B,DCX,SEPTIN6,NEFL,TSPAN17,TUBA1A,SYT11,NRK,SYT1,NOVA1,DPYSL3,RGS4,INA,ARMH4
Coexpression Atlas	gudmap_developingGonad_e18.5_testes_1000	DevelopingGonad_e18.5_testes_emap-11164_top-relative-expression-ranked_1000	Gudmap Mouse MOE430.2	5.149e-09	2.018e-05	6.795e-08	6.015e-07	45	814	TTYH1,VGLL3,RAMP2,CADM4,ACTG2,TUBB3,MYL9,SEMA5B,TBC1D14,FKBP1A,LTBP4,COL4A1,ISLR2,SFRP1,SFSWAP,RGS5,OLFML2B,SOSTDC1,OSR1,SNRPN,MYH11,INHBA,GAS1,RBM26,TUBB2B,NFIB,NRK,NNAT,TAGLN,PCBP4,DDR1,DPYSL3,CALD1,NT5E,DTNA,CAMK2G,ADAMTS5,GSK3B,EDNRA,PAK3,LY6E,LY6H,SMAD1,RBFOX2,EPHA3
Coexpression Atlas	gudmap_dev gonad_e12.5_M_InterstitLeydig_MafB_500	dev gonad_e12.5_M_InterstitLeydig_MafB_top-relative-expression-ranked_500	Gudmap Mouse ST 1.0	5.166e-09	2.025e-05	6.795e-08	6.015e-07	28	364	TPM1,ACTA2,LTBP4,COL6A3,SFRP1,WT1,RND3,POSTN,LRRN3,IGFBP7,UHRF1,PDE5A,ATP2B4,INHBA,DENND2B,BGN,OLFML1,SULF1,NRK,CALD1,PLXDC1,LPAR1,EDNRA,TGFB2,HMCN1,EGR2,PAK3,ARMH4
Coexpression Atlas	gudmap_developingKidney_e15.5_Pelvic Mesenchyme_500	DevelopingKidney_e15.5_Pelvic Mesenchyme_emap-8241_top-relative-expression-ranked_500	Gudmap Mouse MOE430.2	5.199e-09	2.038e-05	6.816e-08	6.033e-07	30	412	EYA4,PENK,MCM5,ADCY2,FZD1,PCDH10,CNTN1,FOXC2,COL9A1,SOSTDC1,POU3F1,CCDC80,AKAP12,GIGYF2,DKK3,MYLK,GATA2,PARD6G,TUBB2B,DCX,NTM,TAGLN,MSRB3,TBX18,THBS2,CCBE1,AADAT,LY6H,RBFOX2,EPHA3
Coexpression	M4288	SARRIO_EPITHELIAL_MESENCHYMAL_TRANSITION_UP	C2:CGP: Chemical and Genetic Perturbations	5.244e-09	4.889e-05	2.91e-07	2.828e-06	17	166	MCM5,HMMR,ENOPH1,FABP5,TUBB3,ANLN,TUBB,STIL,SMTN,UHRF1,FJX1,TUBA1A,BUB1,NT5E,STMN1,TGFB2,CDK2AP1
Coexpression	M17163	CAIRO_LIVER_DEVELOPMENT_UP	C2:CGP: Chemical and Genetic Perturbations	5.244e-09	4.889e-05	2.91e-07	2.828e-06	17	166	PKM,PLS3,LRP12,POGK,WT1,ID3,CRABP2,GAS1,MARCKSL1,GDF10,SEPTIN6,NNAT,WASF1,GPC1,EHBP1,TGFB2,SEMA3D
Coexpression	M41746	RUBENSTEIN_SKELETAL_MUSCLE_SMOOTH_MUSCLE_CELLS	C8: Cell Type Signature	5.369e-09	5.005e-05	2.961e-07	2.878e-06	28	445	TPM1,TPM2,ACTA2,MCAM,ACTG2,MYL9,PKM,FHL1,PLN,CNN1,RGS5,CRIP2,IGFBP7,SNCG,DKK3,ATP5F1C,MYH11,MYLK,BGN,CCDC3,KCNMB1,SGCE,TAGLN,CALD1,EDNRA,MSRB3,LMNA,ENTPD3
Coexpression Atlas	gudmap_developingLowerUrinaryTract_adult_bladder_1000_k4	DevelopingLowerUrinaryTract_adult_bladder_emap-29457_k-means-cluster#4_top-relative-expression-ranked_1000	Gudmap Mouse MOE430.2	5.431e-09	2.129e-05	7.096e-08	6.281e-07	15	104	TPM1,MYL9,CNN1,COL12A1,RGS5,SMTN,SCUBE2,MYH11,MYLK,PTHLH,KCNMB1,GLIPR1,NIPAL4,CALD1,THBS2
Coexpression	MM983	GAUSSMANN_MLL_AF4_FUSION_TARGETS_F_UP	M2:CGP: Chemical and Genetic Perturbations	5.456e-09	5.086e-05	2.992e-07	2.907e-06	18	188	ACTG2,RCBTB2,FST,CNN1,ISG15,OSR1,IL17RD,DKK3,GAS1,RBM26,NUAK1,WNK2,NT5E,RGS4,TTLL7,LTBP2,LY6E,LY6H
Coexpression Atlas	Facebase_RNAseq_e9.5_Maxillary Arch_500_K3	FacebaseRNAseq_e9.5_Maxillary Arch_top-relative-expression-ranked_500_k-means-cluster#3	FaceBase_RNAseq	5.491e-09	2.152e-05	7.151e-08	6.329e-07	17	137	ADCY2,SLITRK6,FOXC1,COL6A3,CHODL,TNC,SOSTDC1,OSR1,DKK2,INHBA,GATA3,P4HA3,COL24A1,NFIB,NRK,CCDC3,THBS2
Coexpression Atlas	PCBC_ratio_MESO-30_from-OSK-L-l-p53KD_vs_MESO-30_from-ESC_cfr-2X-p05	Mesoderm Day 30-reprogram_OSK-L-l-p53KD_vs_Mesoderm Day 30-reprogram_NA-Confounder_removed-fold2.0_adjp0.05	PCBC_AltAnalyze	5.556e-09	2.178e-05	7.188e-08	6.362e-07	14	89	EVA1A,ARHGAP29,FST,COL12A1,COL13A1,PODXL,DKK1,H19,GAS1,SULF1,KRT7,RGS4,SEMA3D,THBS2
Coexpression Atlas	PCBC_ratio_MESO-30_from-episomal_vs_MESO-30_from-ESC_cfr-2X-p05	Mesoderm Day 30-method_episomal_vs_Mesoderm Day 30-method_NA-Confounder_removed-fold2.0_adjp0.05	PCBC_AltAnalyze	5.556e-09	2.178e-05	7.188e-08	6.362e-07	14	89	EVA1A,ARHGAP29,FST,COL12A1,COL13A1,PODXL,DKK1,H19,GAS1,SULF1,KRT7,RGS4,SEMA3D,THBS2
Coexpression Atlas	gudmap_developingLowerUrinaryTract_e14.5_ bladder_200_k3	DevelopingLowerUrinaryTract_e14.5_ bladder_emap-30872_k-means-cluster#3_top-relative-expression-ranked_200	Gudmap Mouse MOE430.2	5.579e-09	2.187e-05	7.194e-08	6.367e-07	9	29	ACTG2,UPK3A,PDE5A,MYH11,GBP1,NFIB,CALD1,ACTR3B,MSRB3
GO: Biological Process	GO:0097435	supramolecular fiber organization		5.703e-09	3.265e-05	8.825e-07	8.146e-06	52	1013	TPM1,TPM2,CDKN2A,MAP2,KATNAL1,TUBB4A,MYL9,MMP11,FKBP1A,LTBP4,PLS3,CNN1,CAP2,FOXC1,FOXC2,COL9A1,BIN1,SFRP1,COL12A1,CDC42EP3,WDR47,TTC17,CCN2,LIMCH1,MYADM,MYH11,GAS2,MARCKSL1,AIF1L,NEFL,CYRIA,TUBA1A,STMN3,TAGLN,WASF1,SHANK1,KRT7,DPYSL3,CALD1,STMN1,LCP1,LPAR1,RGS4,TGFB2,KATNBL1,INA,TJP1,TLL2,PAK3,LTBP2,GREM1,PHLDB2
Coexpression Atlas	gudmap_dev lower uro neuro_e15.5_BladdPelvicGanglion_Sox10_100	dev lower uro neuro_e15.5_BladdPelvicGanglion_Sox10_top-relative-expression-ranked_100	Gudmap Mouse ST 1.0	5.765e-09	2.26e-05	7.409e-08	6.558e-07	13	75	PENK,TUBB3,TUBB4A,SLITRK6,POSTN,GATA3,NEFL,SYT11,STMN3,SYT1,DPYSL3,RGS4,INA
Coexpression	M2025	NAKAMURA_ADIPOGENESIS_EARLY_DN	C2:CGP: Chemical and Genetic Perturbations	6.119e-09	5.704e-05	3.308e-07	3.214e-06	9	35	TPM1,ACTG2,POSTN,MYH11,GLIPR1,CALD1,NT5E,RGS4,THBS2
Coexpression	M11788	CLASPER_LYMPHATIC_VESSELS_DURING_METASTASIS_DN	C2:CGP: Chemical and Genetic Perturbations	6.119e-09	5.704e-05	3.308e-07	3.214e-06	9	35	SDC1,FOXC2,COL6A3,BGN,GPC1,NT5E,LPAR1,LTBP2,CDH2
Coexpression	M2506	LEE_NEURAL_CREST_STEM_CELL_UP	C2:CGP: Chemical and Genetic Perturbations	6.139e-09	5.723e-05	3.308e-07	3.214e-06	16	147	FST,SGCD,PODXL,CRABP2,POSTN,LRRN3,MOXD1,IGFBP7,DCX,BGN,NEFL,NNAT,PCBP4,TFAP2A,EDNRA,INA
Coexpression Atlas	gudmap_developingGonad_P2_testes_1000	DevelopingGonad_P2_testes_emap-30171_top-relative-expression-ranked_1000	Gudmap Mouse MOE430.2	6.202e-09	2.431e-05	7.945e-08	7.033e-07	45	819	TTYH1,VGLL3,RAMP2,CADM4,ACTG2,REEP2,TUBB3,MYL9,SEMA5B,FKBP1A,LTBP4,ISLR2,SFRP1,SFSWAP,OLFML2B,DPYSL4,OSR1,GLIPR2,SNRPN,MYH11,MYLK,INHBA,GAS1,TUBB2B,NFIB,NRK,NNAT,TAGLN,PCBP4,DDR1,DPYSL3,CALD1,NT5E,DTNA,CAMK2G,ADAMTS5,CBFA2T3,EDNRA,PAK3,SLC7A5,PSME3,LY6E,SMAD1,RBFOX2,EPHA3
Coexpression Atlas	Facebase_RNAseq_ratio_e10.5_MaxillaryArch_vs_Mandibular_1000_K1	FacebaseRNAseq_ratio_e10.5_MaxillaryArch_vs_Mandibular_top-relative-expression-ranked_1000_k-means-cluster#1	FaceBase_RNAseq	6.401e-09	2.509e-05	8.174e-08	7.235e-07	23	255	MAP2,MEIS2,KIAA1549L,PGAP1,LTBP4,MGAT5B,COL8A1,SFRP1,WNT7A,MANBAL,ZNF43,NCAM2,DCX,SHANK1,MAMLD1,GAL3ST4,TAMALIN,GPR137C,TLE4,PAK3,SENP7,TPBG,EPHA3
Coexpression Atlas	Facebase_RNAseq_ratio_e9.5_MandibularArch_vs_MaxillaryArch_2500_K5	FacebaseRNAseq_ratio_e9.5_MandibularArch_vs_MaxillaryArch_top-relative-expression-ranked_2500_k-means-cluster#5	FaceBase_RNAseq	6.425e-09	2.519e-05	8.177e-08	7.238e-07	42	734	PDE4D,BACH2,RFTN2,FZD1,SLITRK6,MARCHF4,COL6A3,COL9A2,OLFML2B,ZFP14,SP110,ARHGDIB,MOXD1,ZKSCAN1,NSG1,OSR1,RASL11B,ATP2B4,DKK3,DKK2,P4HA3,BGN,COL24A1,ST6GAL2,OLFML1,NFIB,CCDC3,ARHGEF9,EXOC6B,MAFB,GPC2,GRIN3A,DNMT3A,EHBP1,CACNA1C,KRT7,ZFP90,LMNA,SERTAD4,PWWP3B,UBASH3B,HSD17B14
Coexpression Atlas	gudmap_developingKidney_e15.5_Pelvic Mesenchyme_500_k4	DevelopingKidney_e15.5_Pelvic Mesenchyme_emap-8241_k-means-cluster#4_top-relative-expression-ranked_500	Gudmap Mouse MOE430.2	7.129e-09	2.794e-05	9.044e-08	8.005e-07	20	195	EYA4,PENK,ADCY2,FZD1,PCDH10,CNTN1,POU3F1,CCDC80,AKAP12,DKK3,MYLK,GATA2,NTM,TAGLN,MSRB3,TBX18,THBS2,CCBE1,LY6H,EPHA3
Coexpression Atlas	gudmap_dev gonad_e11.5_M_GonadVasMes_Flk_500	dev gonad_e11.5_M_GonadVasMes_Flk_top-relative-expression-ranked_500	Gudmap Mouse ST 1.0	7.249e-09	2.841e-05	9.166e-08	8.113e-07	30	418	MCC,MEIS2,FBN2,MYL9,CAP2,COL6A3,SFRP1,RGS5,WT1,CCDC80,CRABP2,RND3,POSTN,NKD1,UHRF1,H19,ADAM19,DENND2B,OLFML1,SULF1,NRK,NNAT,CALD1,LCP1,LPAR1,EDNRA,SEMA3D,HMCN1,EGR2,VASH2
Coexpression Atlas	gudmap_developingLowerUrinaryTract_P2_bladder detrusor (LCM)_500_k4	DevelopingLowerUrinaryTract_P2_bladder detrusor (LCM)_emap-30376_k-means-cluster#4_top-relative-expression-ranked_500	Gudmap Mouse MOE430.2	7.481e-09	2.933e-05	9.43e-08	8.346e-07	14	91	PDE4D,ABCA9,FHL1,CAP2,PDE5A,DKK3,MYLK,GBP1,CYRIA,DTNA,TTLL7,MSRB3,TBX18,THBS2
GO: Biological Process	GO:0048880	sensory system development		7.638e-09	4.373e-05	1.151e-06	1.062e-05	49	932	EPHB2,EYA4,RHOJ,CADM4,MEIS2,FABP5,FBN2,ALDH1A3,SLITRK6,KIF17,FOXC1,FOXC2,COL4A1,COL8A1,SFRP1,FN1,WNT7A,WT1,NKD1,DKK1,CELF1,UHRF1,CTNS,ATP2B4,MIAT,DKK3,DKK2,INHBA,GAS1,GATA3,FJX1,MARCKSL1,MEIS3,DCX,SULF1,NFIB,NECTIN1,MAFB,DLX2,TMEM231,CACNA1C,ZEB1,TFAP2A,ZNF503,TGFB2,SOX21,EGR2,PBX3,CDH2
Coexpression	M2879	BLUM_RESPONSE_TO_SALIRASIB_DN	C2:CGP: Chemical and Genetic Perturbations	7.97e-09	7.43e-05	4.27e-07	4.149e-06	24	341	MCM5,HMMR,MEIS2,PKM,HSPA2,UBE2E3,PLS3,SDC1,RGS5,TUBB,STIL,CRABP2,CRIP2,MYLK,TUBA1A,BUB1,NNAT,DPYSL3,STMN1,RGS4,NARF,LMNA,CDK2AP1,GREM1
Coexpression	MM1212	CLASPER_LYMPHATIC_VESSELS_DURING_METASTASIS_DN	M2:CGP: Chemical and Genetic Perturbations	8.035e-09	7.49e-05	4.28e-07	4.159e-06	9	36	SDC1,FOXC2,COL6A3,BGN,GPC1,NT5E,LPAR1,LTBP2,CDH2
Coexpression Atlas	Facebase_RNAseq_e10.5_Neural Epithelium Overlying Central Eminence_500	FacebaseRNAseq_e10.5_Neural Epithelium Overlying Central Eminence_top-relative-expression-ranked_500	FaceBase_RNAseq	8.247e-09	3.233e-05	1.036e-07	9.172e-07	33	496	TTYH1,MAP2,BACH2,REEP2,TUBB3,TUBB4A,KIAA1549L,SEMA5B,MGAT5B,RBM38,POU3F1,DLL3,IL17RD,MYCL,DCX,SYT11,SULF1,STMN3,ASTN2,DLX2,NNAT,WNK2,NOVA1,DTNA,MAMLD1,GAL3ST4,SOX21,INA,GPR137C,PAK3,TOX2,CDH2,SENP7
Coexpression Atlas	PCBC_ratio_DE_vs_SC_1000	ratio_induced-DefinitiveEndoderm_vs_StemCell_top-relative-expression-ranked_1000	PCBC	8.44e-09	3.308e-05	1.057e-07	9.356e-07	50	976	CDKN2A,DACT2,MCC,HLX,TENM2,FBN2,ARHGAP29,ALDH1A3,SLITRK6,AMOTL2,PCDH10,FOXC1,TOM1L2,JCAD,COL8A1,COL9A2,COL13A1,FN1,TNC,WT1,ARL4D,DKK1,IGFBP7,GLIPR2,CCN2,DKK3,ARHGAP24,ADAM19,GATA3,MEIS3,SLFN5,PDE10A,PTHLH,OLFML1,RBMS3,CCDC3,ZNF558,KCNMB1,TAGLN,ST8SIA4,GLIPR1,ZEB1,DUSP4,MAMLD1,ADAMTS5,ZNF503,SERTAD4,GREM1,AADAT,CDH2
Coexpression Atlas	gudmap_developingLowerUrinaryTract_e14.5_ Genital tubercle_500_k5	DevelopingLowerUrinaryTract_e14.5_ Genital tubercle_emap-6706_k-means-cluster#5_top-relative-expression-ranked_500	Gudmap Mouse MOE430.2	8.487e-09	3.327e-05	1.059e-07	9.378e-07	21	217	RFTN2,CSRNP3,SLITRK6,PCDH10,COL8A1,WNT7A,SOSTDC1,RND3,DKK1,LIMCH1,DKK2,SPOCK1,COL24A1,ST6GAL2,SULF1,NTM,DLX2,DPYSL3,TFAP2A,EDNRA,FRMD6
Coexpression	M3837	WEST_ADRENOCORTICAL_TUMOR_DN	C2:CGP: Chemical and Genetic Perturbations	9.109e-09	8.491e-05	4.825e-07	4.688e-06	31	546	RCBTB2,MEIS2,EHD3,FZD1,FHL1,PLN,LTBP4,FOXC2,KLF11,LMF1,PODXL,SMTN,POSTN,LRRN3,MOXD1,SCUBE2,DKK3,MYLK,GAS1,SEPTIN6,BGN,OLFML1,RBMS3,TAGLN,CALD1,UBXN1,CBFA2T3,LPAR1,LY6E,CDH2,PLEKHO1
Coexpression Atlas	Facebase_RNAseq_e9.5_Facial Mesenchyne_500_K3	FacebaseRNAseq_e9.5_Facial Mesenchyne_top-relative-expression-ranked_500_k-means-cluster#3	FaceBase_RNAseq	9.461e-09	3.709e-05	1.177e-07	1.042e-06	18	160	ADCY2,SLITRK6,FOXC1,COL6A3,CHODL,TNC,OSR1,LIMCH1,DKK2,INHBA,P4HA3,LAMP5,COL24A1,NFIB,NRK,CCDC3,TFAP2A,THBS2
GO: Biological Process	GO:0022603	regulation of anatomical structure morphogenesis		9.867e-09	5.65e-05	1.449e-06	1.337e-05	59	1247	TPM1,EPHB2,RAMP2,MAP2,RHOJ,PICALM,FZD1,SEMA5B,HOXD11,PKM,AMOTL2,FOXC1,FOXC2,TRIM46,SEMA3F,JCAD,ISLR2,SFRP1,FN1,CHODL,TNC,WNT7A,WT1,CRABP2,CDC42EP3,NKD1,DKK1,OSR1,ATP2B4,MYH11,GAS2,GATA2,GATA3,PARD6G,DCX,NEFL,SULF1,SYT1,DDHD2,ZEB1,SASH1,LPAR1,GSK3B,EDNRA,TGFB2,TBX18,SEMA3D,THBS2,TJP1,CCBE1,VASH2,PAK3,GREM1,CDH2,PLEKHO1,EPB41,SMAD1,PHLDB2,TPBG
Coexpression Atlas	facebase_RNAseq_e14.5_palate_poster_proximal_ERK2_WT_2500_K3	facebase_RNAseq_e14.5_palate_poster_proximal_ERK2_WT_2500_K3	Gudmap RNAseq	1.019e-08	3.995e-05	1.264e-07	1.119e-06	22	240	TRPC4,ACTA2,MCAM,ABCA9,MYL9,COL4A1,COL6A3,TNC,OLFML2B,CCDC80,ARHGDIB,IGFBP7,PRKG1,DKK2,MYH11,HTRA1,GDF10,BGN,TAGLN,NT5E,MSRB3,C1orf198
Coexpression Atlas	gudmap_kidney_P1_CapMes_Crym_1000	kidney_P1_CapMes_Crym_top-relative-expression-ranked_1000	Gudmap Mouse MOE430.2	1.028e-08	4.029e-05	1.271e-07	1.125e-06	38	634	TPM2,EYA4,RAMP2,ASIC2,PENK,ACTA2,MCAM,MEIS2,FBN2,MEX3A,HOXD11,FOXC1,FOXC2,SEMA3F,COL12A1,TNC,WT1,CRABP2,AKAP12,MOXD1,OSR1,LIMCH1,IL17RD,GAS2,P4HA3,LAMP5,DCX,SEPTIN6,NUAK1,OLFML1,DTNA,CNTRL,PCDHB10,EDNRA,HMCN1,CDK2AP1,CDH2,TPBG
GO: Biological Process	GO:0031344	regulation of cell projection organization		1.038e-08	5.945e-05	1.486e-06	1.372e-05	49	941	EPHB2,MAP2,CSMD3,TENM2,PICALM,FZD1,SEMA5B,PROM2,ANLN,TBC1D14,MAP4K4,CNTN1,TRIM46,SEMA3F,ISLR2,SFRP1,COL12A1,FN1,CHODL,TNC,PODXL,WNT7A,CRABP2,CDC42EP3,CRMP1,DKK1,CCP110,ARHGAP24,SPOCK1,DOCK11,GATA3,PARD6G,TUBB2B,DCX,NEFL,NTM,KIF3C,GPC2,NOVA2,DDR1,DPYSL3,CAMK2G,LPAR1,GSK3B,NCS1,SEMA3D,PAK3,CDH2,EPHA3
Coexpression Atlas	gudmap_developingLowerUrinaryTract_P1_bladder_200_J	DevelopingLowerUrinaryTract_P1_bladder_J_emap-30374_top-relative-expression-ranked_200	Gudmap Mouse MOE430.2	1.045e-08	4.095e-05	1.288e-07	1.14e-06	18	161	TPM2,VGLL3,ACTA2,ACTG2,MYL9,UPK3A,CNN1,DKK3,MYH11,MYLK,PTHLH,NEFL,TAGLN,KRT7,NIPAL4,NT5E,MSRB3,THBS2
Coexpression Atlas	PCBC_ratio_ECTO blastocyst_vs_ECTO bone marrow_cfr-2X-p05	ECTO blastocyst_vs_ECTO bone marrow-Confounder_removed-fold2.0_adjp0.05	PCBC_AltAnalyze	1.059e-08	4.153e-05	1.302e-07	1.152e-06	17	143	PCDH10,IGLON5,CNN1,LMF1,FN1,DPYSL4,NLRP2,LRRN3,DKK1,IGFBP7,RASL11B,SPOCK1,GAS1,ST6GAL2,MAFB,CTXN1,EDNRA
Coexpression Atlas	gudmap_RNAseq_e15.5_Podocytes_2500_K0	gudmap_RNAseq_e15.5_Podocytes_2500_K0	Gudmap RNAseq	1.26e-08	4.94e-05	1.544e-07	1.366e-06	55	1143	RAMP2,PENK,HLX,ACTG2,HSPBP1,NREP,REEP2,ADCY2,FABP5,FZD1,SEMA5B,HOXD11,ARHGAP31,EVA1A,FKBP1A,LTBP4,CNN1,JCAD,STARD4,PODXL,ID3,SOSTDC1,AKAP12,SMTN,NKD1,ZNF43,NSG1,CYYR1,GLIPR2,LIMCH1,ATP2B4,DKK3,H19,MYADM,MARCKSL1,BRINP1,FBXL7,OLFML1,NFIB,NTM,NRK,CCDC3,MAFB,NOVA2,CTXN1,SHANK1,GPC1,GLIPR1,DPYSL3,LCP1,ZNF503,NARF,TBX18,CCBE1,UBASH3B
Coexpression	M1951	MEISSNER_NPC_HCP_WITH_H3K4ME2	C2:CGP: Chemical and Genetic Perturbations	1.278e-08	0.0001192	6.733e-07	6.543e-06	29	493	TPM1,RAMP2,REEP2,ARHGAP29,ALDH1A3,MARCHF4,LTBP4,MGAT5B,SEMA3F,COL12A1,OLFML2B,DPYSL4,SCUBE2,DLL3,SPOCK1,GATA3,SYNC,BRINP1,GDF10,PTHLH,NRK,CCDC3,NNAT,PLXDC1,TSC22D3,ADAMTS5,TLL2,SERTAD4,LY6E
Coexpression Atlas	gudmap_dev lower uro neuro_e14.5_BladdPelvicGanglion_Sox10_k3_1000	dev lower uro neuro_e14.5_BladdPelvicGanglion_Sox10_k-means-cluster#3_top-relative-expression-ranked_1000	Gudmap Mouse ST 1.0	1.305e-08	5.117e-05	1.594e-07	1.411e-06	20	202	VGLL3,EYA4,MAP2,CSRNP3,HOXD11,PGAP1,SLITRK6,CNTN1,PCYT1B,POSTN,LRRN3,NCAM2,DCX,CYRIA,RBMS3,NRK,SYT1,NOVA1,INA,ARMH4
GO: Biological Process	GO:0009968	negative regulation of signal transduction		1.322e-08	7.572e-05	1.847e-06	1.705e-05	70	1616	EPHB2,EYA4,PDE4D,CADM4,DACT2,MCC,FAM89B,FZD1,FBN2,FST,FKBP1A,MRTFA,FOXC1,FOXC2,SFRP1,RGS5,SESN3,SOSTDC1,APLP1,NLRP2,AKAP12,SCUBE2,NKD1,DKK1,TAF9B,ISG15,DLL3,ITPRIP,RASL11B,IL17RD,IFI6,ATP2B4,DKK3,DKK2,MYADM,HTRA1,ARHGAP24,GAS1,GATA2,GATA3,GBP1,MEIS3,PDE10A,NUAK1,RBMS3,SULF1,STMN3,CCDC3,DLX2,PCBP4,WNK2,GPC1,UACA,DUSP4,PSCA,STMN1,TFAP2A,LPAR1,RGS4,RGS12,GSK3B,TGFB2,TBX18,LMNA,TLE4,PSME3,GREM1,UBASH…
Coexpression Atlas	gudmap_kidney_P0_CapMes_Crym_1000	kidney_P0_CapMes_Crym_top-relative-expression-ranked_1000	Gudmap Mouse MOE430.2	1.322e-08	5.182e-05	1.609e-07	1.424e-06	38	640	TPM2,EYA4,RAMP2,ASIC2,PENK,MCAM,MEIS2,FBN2,MEX3A,HOXD11,CAP2,FOXC1,FOXC2,SEMA3F,TNC,WT1,DPYSL4,CRABP2,CDC42EP3,POSTN,MOXD1,OSR1,LIMCH1,IL17RD,GAS2,P4HA3,LAMP5,DCX,SEPTIN6,NUAK1,OLFML1,DTNA,CNTRL,EDNRA,HMCN1,CDK2AP1,CDH2,TPBG
Coexpression	M8448	BENPORATH_PRC2_TARGETS	C2:CGP: Chemical and Genetic Perturbations	1.326e-08	0.0001236	6.947e-07	6.75e-06	34	650	TTYH1,PENK,HLX,CSMD3,FBN2,CLCN5,COL9A2,SFRP1,CHODL,OLFML2B,WNT7A,WT1,POU3F1,SLITRK3,DKK1,OSR1,PRKG1,DKK2,DCHS2,B4GALNT1,GATA2,GATA3,LAMP5,PTHLH,NEFL,COL24A1,ASTN2,MAFB,DLX2,GRIN3A,DUSP4,ZNF503,INA,LTBP2
Coexpression Atlas	Facebase_RNAseq_ratio_e9.5_MaxillaryArch_vs_Mandibular_1000_K1	FacebaseRNAseq_ratio_e9.5_MaxillaryArch_vs_Mandibular_top-relative-expression-ranked_1000_k-means-cluster#1	FaceBase_RNAseq	1.327e-08	5.202e-05	1.611e-07	1.426e-06	23	265	PDE4D,SLITRK6,PCYT1B,COL6A3,COL9A2,SEPTIN5,OLFML2B,SP110,POSTN,NSG1,OSR1,ATP2B4,DKK3,DKK2,P4HA3,BGN,COL24A1,ST6GAL2,OLFML1,NFIB,CCDC3,CACNA1C,KRT7
Coexpression	M8380	GSE22025_TGFB1_VS_TGFB1_AND_PROGESTERONE_TREATED_CD4_TCELL_UP	C7:IMMUNESIGDB: ImmuneSigDB	1.338e-08	0.0001247	6.969e-07	6.772e-06	18	199	EPHB6,REEP2,PGAP1,LTBP4,PLS3,CNTN1,PCYT1B,COL6A3,FN1,ID3,LYPD3,DCBLD2,CYRIA,SYT11,THBS2,TLE4,TPBG,ARHGAP19
Coexpression Atlas	gudmap_kidney_adult_Mesangium_Meis_k2_500	kidney_adult_Mesangium_Meis_k-means-cluster#2_top-relative-expression-ranked_500	Gudmap Mouse MOE430.2	1.354e-08	5.309e-05	1.639e-07	1.45e-06	10	42	ACTA2,MCAM,MYL9,PLN,RGS5,SNCG,MYH11,KCNMB1,EDNRA,SLC7A8
Coexpression Atlas	gudmap_kidney_P4_CapMesRenVes_Crym_1000	kidney_P4_CapMesRenVes_Crym_top-relative-expression-ranked_1000	Gudmap Mouse MOE430.2	1.399e-08	5.484e-05	1.687e-07	1.494e-06	43	783	EYA4,BACH2,PENK,E2F7,FABP5,FBN2,MEX3A,CLCN5,HOXD11,FHL1,CAP2,FOXC2,SEMA3F,TEAD2,TNC,WT1,MOXD1,DKK1,IGFBP7,ZKSCAN1,UHRF1,IL17RD,DKK2,CCP110,ARHGAP24,MYLK,GATA3,FJX1,AIF1L,DCX,MELK,SULF1,NTM,MAFB,DTNA,TFAP2A,NCS1,SEMA3D,CDK2AP1,TNFAIP2,LY6E,HSD17B14,CDH2
Coexpression Atlas	gudmap_kidney_adult_JuxtaGlom_Ren1_Captopr_500	kidney_adult_JuxtaGlom_Ren1_Captopr_top-relative-expression-ranked_500	Gudmap Mouse MOE430.2	1.443e-08	5.656e-05	1.735e-07	1.536e-06	29	406	TPM2,PDE4D,ACTA2,MCAM,MYL9,PLN,CNN1,COL12A1,RGS5,SOSTDC1,IGFBP7,PRKG1,SNCG,DKK2,MYH11,HTRA1,ARHGAP24,GAS2,GATA3,BGN,CCDC3,KCNMB1,TAGLN,CACNA1C,KRT7,CALD1,EDNRA,SLC7A8,AADAT
Coexpression Atlas	PCBC_ratio_DE_vs_SC_cfr-2X-p05	Endoderm Differentiated Cells_vs_Pluripotent Stem Cells-Confounder_removed-fold2.0_adjp0.05	PCBC_AltAnalyze	1.469e-08	5.758e-05	1.761e-07	1.558e-06	37	615	DACT2,MCAM,MCC,PICALM,FBN2,MYL9,AMOTL2,FST,PCDH10,CNN1,CAP2,COL4A1,SEMA3F,COL9A2,COL13A1,FN1,TNC,ARL4D,DKK1,GLIPR2,CCN2,ATP2B4,DKK3,MYADM,ADAM19,MEIS3,OLFML2A,NUAK1,TAGLN,PCBP4,DTNA,DUSP4,SLC7A5,LY6E,AADAT,CDH2,PHLDB2
Coexpression	M15981	RIGGI_EWING_SARCOMA_PROGENITOR_UP	C2:CGP: Chemical and Genetic Perturbations	1.482e-08	0.0001382	7.676e-07	7.46e-06	27	437	CTTNBP2,MCAM,FZD1,KIAA1549L,CSRNP3,JCAD,RGS5,TNC,PODXL,WT1,CRIP2,ARHGDIB,LRRN3,CYYR1,DKK2,GATA2,MARCKSL1,BRINP1,STMN3,NRK,MAFB,ZNF704,EDNRA,HMCN1,ENTPD3,TOX2,EPHA3
Coexpression	M4196	NUYTTEN_EZH2_TARGETS_UP	C2:CGP: Chemical and Genetic Perturbations	1.571e-08	0.0001465	8.092e-07	7.863e-06	45	1033	CPA4,TPM1,EPHB2,MAP2,BACH2,NREP,TRIM22,MEIS2,MARCHF4,FKBP1A,CAP2,MRAS,STARD4,FN1,TNC,PODXL,CDC42EP3,RND3,MOXD1,GLIPR2,CCN2,DCBLD2,SERPINB7,MYADM,SAMD9,INHBA,SYNC,SLFN5,NUAK1,RBMS3,DLX2,DNMT3A,ZNF704,NT5E,RGS4,NCS1,SEMA3D,FRMD6,EGR2,TLE4,SERTAD4,PBX3,SMAD1,PHLDB2,TPBG
Coexpression Atlas	gudmap_RNAseq_e15.5_Mesangium_2500_K3	gudmap_RNAseq_e15.5_Mesangium_2500_K3	Gudmap RNAseq	1.6e-08	6.272e-05	1.912e-07	1.693e-06	22	246	RHOJ,ACTA2,MYL9,FOXC1,COL6A3,COL12A1,RGS5,TNC,WT1,CCDC80,CDC42EP3,IGFBP7,SNCG,DKK2,MYH11,MYLK,GATA3,GBP1,GDF10,TAGLN,ADAMTS5,RGS4
GO: Biological Process	GO:0120035	regulation of plasma membrane bounded cell projection organization		1.601e-08	9.17e-05	2.147e-06	1.982e-05	48	924	EPHB2,MAP2,CSMD3,TENM2,PICALM,FZD1,SEMA5B,ANLN,TBC1D14,MAP4K4,CNTN1,TRIM46,SEMA3F,ISLR2,SFRP1,COL12A1,FN1,CHODL,TNC,PODXL,WNT7A,CRABP2,CDC42EP3,CRMP1,DKK1,CCP110,ARHGAP24,SPOCK1,DOCK11,GATA3,PARD6G,TUBB2B,DCX,NEFL,NTM,KIF3C,GPC2,NOVA2,DDR1,DPYSL3,CAMK2G,LPAR1,GSK3B,NCS1,SEMA3D,PAK3,CDH2,EPHA3
Coexpression Atlas	gudmap_dev gonad_e13.5_M_InterstitTestis_Sma_200	dev gonad_e13.5_M_InterstitTestis_Sma_top-relative-expression-ranked_200	Gudmap Mouse ST 1.0	1.611e-08	6.316e-05	1.92e-07	1.699e-06	17	147	VGLL3,MAP2,ACTA2,COL6A3,SOSTDC1,IGFBP7,ATP2B4,INHBA,BGN,OLFML1,SULF1,NRK,CALD1,ADAMTS5,EDNRA,HMCN1,EGR2
GO: Biological Process	GO:0007010	cytoskeleton organization		1.612e-08	9.233e-05	2.147e-06	1.982e-05	74	1759	TPM1,TPM2,CTTNBP2,MAP2,RHOJ,HMMR,KATNAL1,TUBB3,TUBB4A,MYL9,ANLN,AMOTL2,PLS3,CNN1,CAP2,MRTFA,TRIM46,BIN1,SFRP1,MRAS,CEP85,RAE1,TUBB,STIL,CDC42EP3,CRMP1,SMTN,WDR47,RND3,ARHGDIB,TBCK,TTC17,CCN2,LIMCH1,PRKG1,CCP110,MYADM,MYH11,GAS2,PARD6G,TUBB2B,MARCKSL1,AIF1L,DCX,NEFL,CYRIA,TUBA1A,STMN3,TAGLN,WASF1,SHANK1,KRT7,DPYSL3,CALD1,CNTRL,STMN1,LCP1,CDCA8,LPAR1,RGS4,SDAD1,GSK3B,TTLL7,TGFB2,KATNBL1,INA,LMNA,HM…
Coexpression	M8519	DAVICIONI_MOLECULAR_ARMS_VS_ERMS_DN	C2:CGP: Chemical and Genetic Perturbations	1.639e-08	0.0001528	8.396e-07	8.158e-06	17	179	FABP5,FBN2,CSRNP3,LTBP4,SDC1,SOSTDC1,CRABP2,GAS2,NUAK1,OLFML1,RBMS3,KAZN,NNAT,DUSP4,LPAR1,LY6E,TPBG
Coexpression Atlas	JC_hmvEC_2500_K1	JC_hmvEC_top-relative-expression-ranked_2500_k-means-cluster#1	PCBC	1.665e-08	6.528e-05	1.978e-07	1.751e-06	48	936	CDKN2A,VGLL3,RAMP2,RHOJ,CNTNAP3,MCAM,KIAA1549L,ARHGAP31,EVA1A,ARHGAP29,KIF17,FKBP1A,PLS3,FOXC2,COL4A1,COL8A1,COL13A1,FN1,AKAP12,SMTN,POSTN,IGFBP7,GLIPR2,CCN2,SNCG,DKK3,CNTNAP3B,ARHGAP24,P4HA3,PDE10A,BGN,CYRIA,NUAK1,RBMS3,NFIB,NOVA2,ZEB1,SASH1,UACA,NT5E,MAMLD1,TAMALIN,RGS4,TBX18,LMNA,LTBP2,TNFAIP2,SMAD1
Coexpression Atlas	gudmap_dev gonad_e12.5_M_gudmap_devVasTestis_Flk_1000	dev gonad_e12.5_M_DevVasTestis_Flk_top-relative-expression-ranked_1000	Gudmap Mouse ST 1.0	1.704e-08	6.678e-05	2.017e-07	1.786e-06	45	847	PDE4D,RAMP2,RHOJ,MCAM,HLX,RFTN2,ARHGAP31,ARHGAP29,MAP4K4,FKBP1A,COL4A1,JCAD,BIN1,STARD4,PODXL,CDC42EP3,CRIP2,CRMP1,SMTN,ARHGDIB,CYYR1,LIMCH1,SNCG,ATP2B4,DKK2,H19,ADAM19,DOCK11,SLFN5,FBXL7,ARHGEF9,ST8SIA4,DPYSL3,ZEB1,SASH1,UACA,PLXDC1,LCP1,KATNBL1,HMCN1,EGR2,TJP1,PAK3,PLEKHO1,SMAD1
Coexpression	M15762	RORIE_TARGETS_OF_EWSR1_FLI1_FUSION_DN	C2:CGP: Chemical and Genetic Perturbations	1.742e-08	0.0001624	8.872e-07	8.621e-06	8	28	NREP,SFRP1,RGS5,CRMP1,GATA2,GATA3,DCX,INA
GO: Biological Process	GO:0048562	embryonic organ morphogenesis		1.759e-08	0.0001007	2.289e-06	2.112e-05	39	667	EPHB2,EYA4,HLX,MEIS2,FBN2,HOXD11,ALDH1A3,SLITRK6,FST,PLS3,FOXC1,FOXC2,COL8A1,TEAD2,SFRP1,FN1,STIL,NKD1,OSR1,GAS1,GATA2,GATA3,PTHLH,MAFB,DLX2,CACNA1C,ZEB1,CALD1,CAMK2G,TFAP2A,GSK3B,EDNRA,NCS1,ZNF503,TGFB2,TBX18,SEMA3D,IFT52,CDH2
Coexpression Atlas	gudmap_developingLowerUrinaryTract_adult_bladder_1000_k1	DevelopingLowerUrinaryTract_adult_bladder_emap-29457_k-means-cluster#1_top-relative-expression-ranked_1000	Gudmap Mouse MOE430.2	1.785e-08	6.998e-05	2.108e-07	1.866e-06	17	148	TPM2,PDE4D,ACTA2,ACTG2,TENM2,FHL1,PLN,CAP2,CDC42EP3,DKK3,MYLK,CYRIA,TAGLN,NT5E,DTNA,MSRB3,THBS2
Coexpression Atlas	gudmap_developingGonad_e11.5_ovary + mesonephros_k3_500	DevelopingGonad_e11.5_ovary + mesonephros_emap-3226_k-means-cluster#3_top-relative-expression-ranked_500	Gudmap Mouse MOE430.2	1.808e-08	7.086e-05	2.128e-07	1.884e-06	12	68	TUBB3,CSRNP3,COL9A1,CRABP2,CRMP1,SNCG,MIAT,RBM26,NEFL,STMN3,DPYSL3,RGS4
Coexpression Atlas	facebase_RNAseq_e10.5_Emin_MedNas_2500	facebase_RNAseq_e10.5_Emin_MedNas_2500	Gudmap RNAseq	1.834e-08	7.188e-05	2.152e-07	1.905e-06	63	1414	EPHB2,TTYH1,EYA4,MAP2,E2F7,ACTG2,HMMR,KATNAL1,TRIM29,REEP2,TUBB4A,KIAA1549L,SEMA5B,HOXD11,PGAP1,RAD54B,FHL1,IGLON5,SFRP1,PODXL,WNT7A,DPYSL4,STIL,CRMP1,WDR47,RND3,DKK1,CCP110,GATA3,GBP1,TUBB2B,PDE10A,DCX,NEFL,ST6GAL2,TSPAN17,TUBA1A,SYT11,STMN3,BUB1,ZNF558,KCNMB1,NKAIN1,NNAT,WASF1,WNK2,NOVA2,DPYSL3,ZEB1,DTNA,CNTRL,MAMLD1,PSCA,TLE4,NAT10,ENTPD3,PAK3,R3HDM1,PSPC1,TOX2,CDH2,EPB41,EPHA3
Coexpression Atlas	gudmap_kidney single cell_e11.5_MetanephMesench_Scamp_500	kidney single cell_e11.5_MetanephMesench_StemCellamp_top-relative-expression-ranked_500	Gudmap Mouse MOE430.2	1.954e-08	7.658e-05	2.281e-07	2.019e-06	26	339	MCM5,RFTN2,MEIS2,FABP5,TUBB4A,FOXC1,FOXC2,TEAD2,COL9A1,TUBB,ID3,CRABP2,POSTN,H19,MEIS3,MELK,SULF1,KCNMB4,NNAT,PCBP4,TAF1C,STMN1,CDCA8,HMCN1,CDK2AP1,PLEKHO1
Coexpression Atlas	gudmap_developingLowerUrinaryTract_P2_bladder stroma (LCM)_500	DevelopingLowerUrinaryTract_P2_bladder stroma (LCM)_emap-30396_top-relative-expression-ranked_500	Gudmap Mouse MOE430.2	1.955e-08	7.663e-05	2.281e-07	2.019e-06	28	387	TTYH1,VGLL3,ACTA2,ACTG2,CSMD3,ABCA9,UPK3A,SLITRK6,FHL1,CNN1,COL8A1,CHODL,RGS5,CYYR1,PDE5A,DKK3,MYH11,HTRA1,SPOCK1,GBP1,C11orf87,BGN,TAGLN,NIPAL4,NT5E,ADAMTS5,THBS2,LMNA
Coexpression Atlas	DevelopingLowerUrinaryTract_e14.5_ bladder_emap-6668_k3_200	DevelopingLowerUrinaryTract_e14.5_ bladder_emap-6668_k-means-cluster#3_top-relative-expression-ranked_200	Gudmap Mouse MOE430.2	1.992e-08	7.81e-05	2.317e-07	2.051e-06	9	33	VGLL3,ACTG2,DKK3,MYH11,GBP1,CYRIA,ACTR3B,MSRB3,TBX18
GO: Biological Process	GO:0023057	negative regulation of signaling		2.041e-08	0.0001169	2.597e-06	2.397e-05	74	1769	EPHB2,EYA4,PDE4D,CADM4,PENK,DACT2,MCC,FAM89B,FZD1,FBN2,FST,MAP4K4,FKBP1A,MRTFA,FOXC1,FOXC2,SFRP1,RGS5,SESN3,SOSTDC1,APLP1,NLRP2,AKAP12,SCUBE2,NKD1,DKK1,TAF9B,ISG15,DLL3,ITPRIP,RASL11B,IL17RD,IFI6,ATP2B4,DKK3,DKK2,MYADM,HTRA1,ARHGAP24,INHBA,GAS1,GATA2,GATA3,GBP1,MEIS3,PDE10A,NUAK1,RBMS3,SULF1,STMN3,CCDC3,DLX2,PCBP4,WNK2,GPC1,UACA,DUSP4,PSCA,STMN1,TFAP2A,LPAR1,RGS4,RGS12,GSK3B,OPRK1,TGFB2,TBX18,LMN…
Coexpression Atlas	gudmap_dev gonad_e12.5_F_VasAssMesen_MafB_500	dev gonad_e12.5_F_VasAssMesen_MafB_top-relative-expression-ranked_500	Gudmap Mouse ST 1.0	2.066e-08	8.099e-05	2.396e-07	2.121e-06	28	388	MAP2,ADCY2,FBN2,MYL9,ARHGAP29,FST,COL6A3,SFRP1,COL12A1,RGS5,PODXL,WT1,SESN3,CCDC80,CRABP2,POSTN,NKD1,H19,DENND2B,SULF1,NRK,CALD1,EDNRA,TGFB2,HMCN1,EGR2,PBX3,CDH12
Coexpression	MM830	MEISSNER_NPC_HCP_WITH_H3K4ME2	M2:CGP: Chemical and Genetic Perturbations	2.074e-08	0.0001933	1.046e-06	1.016e-05	29	504	TPM1,RAMP2,REEP2,ARHGAP29,ALDH1A3,MARCHF4,LTBP4,MGAT5B,SEMA3F,COL12A1,OLFML2B,DPYSL4,SCUBE2,DLL3,SPOCK1,GATA3,SYNC,BRINP1,GDF10,PTHLH,NRK,CCDC3,NNAT,PLXDC1,TSC22D3,ADAMTS5,TLL2,SERTAD4,LY6E
Coexpression	M8124	SMID_BREAST_CANCER_BASAL_UP	C2:CGP: Chemical and Genetic Perturbations	2.075e-08	0.0001934	1.046e-06	1.016e-05	34	662	TPM2,TTYH1,CDKN2A,MAP2,ACTG2,MCM5,TRIM29,ADCY2,FABP5,UBE2E3,FOXC1,LRP12,SFRP1,MRAS,CHODL,SOSTDC1,RND3,DKK1,CCN2,MYLK,GBP1,TUBB2B,DCX,MELK,NFIB,TMCC2,BUB1,ARHGEF9,CALD1,CDCA8,ZNF532,VASH2,SLC7A5,CDH2
Coexpression Atlas	gudmap_kidney_adult_RenCorpuscGlomer_500	kidney_adult_RenCorpuscGlomer_top-relative-expression-ranked_500	Gudmap Mouse MOE430.2	2.094e-08	8.21e-05	2.417e-07	2.139e-06	30	438	RAMP2,TRPC4,MCC,ABCA9,EHD3,FOXC1,FOXC2,RGS5,PODXL,CCDC80,IFIT1,CRIP2,POSTN,TAF9B,IGFBP7,CYYR1,CCN2,PRKG1,DKK2,HTRA1,ARHGAP24,GATA3,AIF1L,SLFN5,BGN,MAFB,UACA,NT5E,ADAMTS5,TNFAIP2
Coexpression Atlas	Facebase_RNAseq_e10.5_Neural Epithelium Overlying Lateral Eminence_2500_K2	FacebaseRNAseq_e10.5_Neural Epithelium Overlying Lateral Eminence_top-relative-expression-ranked_2500_k-means-cluster#2	FaceBase_RNAseq	2.096e-08	8.218e-05	2.417e-07	2.139e-06	36	596	EYA4,PDE4D,RFTN2,SLITRK6,COL9A2,RGS5,OLFML2B,SOSTDC1,ZFP14,SP110,POSTN,ARHGDIB,MOXD1,OSR1,RASL11B,ATP2B4,DKK3,DKK2,ARHGAP24,BGN,COL24A1,OLFML1,NFIB,NRK,ARHGEF9,EXOC6B,MAFB,KAZN,GPC2,GRIN3A,DNMT3A,CACNA1C,KRT7,LMNA,HSD17B14,EPB41
Coexpression Atlas	gudmap_developingKidney_e14.5 whole kidney - Wnt4 KO_500_k3	DevelopingKidney_e14.5 whole kidney - Wnt4 KO_emap-6674_k-means-cluster#3_top-relative-expression-ranked_500	Gudmap Mouse MOE430.2	2.161e-08	8.473e-05	2.481e-07	2.196e-06	19	188	VGLL3,MAP2,RCBTB2,MEIS2,FBN2,CSRNP3,SFRP1,RND3,DOCK11,DCX,SULT1E1,NTM,DPYSL3,TGFB2,SEMA3D,HMCN1,SERTAD4,PWWP3B,CDH2
Coexpression Atlas	Facebase_RNAseq_ratio_e9.5_MaxillaryArch_vs_Mandibular_2500_K2	FacebaseRNAseq_ratio_e9.5_MaxillaryArch_vs_Mandibular_top-relative-expression-ranked_2500_k-means-cluster#2	FaceBase_RNAseq	2.164e-08	8.484e-05	2.481e-07	2.196e-06	38	652	PDE4D,BACH2,RFTN2,FZD1,SLITRK6,PCYT1B,COL9A2,RGS5,OLFML2B,ZFP14,SP110,POSTN,ARHGDIB,MOXD1,ZKSCAN1,NSG1,OSR1,RASL11B,ATP2B4,DKK2,ARHGAP24,BGN,COL24A1,ST6GAL2,OLFML1,NFIB,NRK,ARHGEF9,EXOC6B,MAFB,KAZN,GPC2,GRIN3A,DNMT3A,CACNA1C,KRT7,SERTAD4,UBASH3B
GO: Biological Process	GO:0010648	negative regulation of cell communication		2.189e-08	0.0001254	2.725e-06	2.515e-05	74	1772	EPHB2,EYA4,PDE4D,CADM4,PENK,DACT2,MCC,FAM89B,FZD1,FBN2,FST,MAP4K4,FKBP1A,MRTFA,FOXC1,FOXC2,SFRP1,RGS5,SESN3,SOSTDC1,APLP1,NLRP2,AKAP12,SCUBE2,NKD1,DKK1,TAF9B,ISG15,DLL3,ITPRIP,RASL11B,IL17RD,IFI6,ATP2B4,DKK3,DKK2,MYADM,HTRA1,ARHGAP24,INHBA,GAS1,GATA2,GATA3,GBP1,MEIS3,PDE10A,NUAK1,RBMS3,SULF1,STMN3,CCDC3,DLX2,PCBP4,WNK2,GPC1,UACA,DUSP4,PSCA,STMN1,TFAP2A,LPAR1,RGS4,RGS12,GSK3B,OPRK1,TGFB2,TBX18,LMN…
Coexpression Atlas	gudmap_developingLowerUrinaryTract_P1_bladder_B_500_k2	DevelopingLowerUrinaryTract_P1_bladder_B_emap-30374_k-means-cluster#2_top-relative-expression-ranked_500	Gudmap Mouse MOE430.2	2.205e-08	8.642e-05	2.52e-07	2.23e-06	15	115	TPM1,TPM2,ACTA2,ACTG2,TENM2,MYL9,CNN1,MYH11,GBP1,PTHLH,KCNMB1,TAGLN,NT5E,DTNA,THBS2
Coexpression	M39254	MENON_FETAL_KIDNEY_4_PODOCYTES	C8: Cell Type Signature	2.294e-08	0.0002139	1.15e-06	1.117e-05	18	206	TPM1,MYL9,ARHGAP29,FOXC1,COL9A1,PODXL,WT1,CCN2,HTRA1,AIF1L,SEPTIN2,SULF1,MAFB,CALD1,UACA,TSC22D3,TJP1,ARMH4
Coexpression Atlas	gudmap_developingKidney_e15.5_Podocyte cells_500	DevelopingKidney_e15.5_Podocyte cells_emap-27915_top-relative-expression-ranked_500	Gudmap Mouse MOE430.2	2.338e-08	9.165e-05	2.664e-07	2.358e-06	29	415	EYA4,PENK,ACTG2,ABCA9,EVA1A,CNTN1,FOXC1,FOXC2,COL9A1,PODXL,WT1,POU3F1,DKK1,CYYR1,IL17RD,DKK3,MYH11,MYLK,GBP1,AIF1L,GDF10,CYRIA,CCDC3,MAFB,GAL3ST4,TTLL7,TBX18,TNFAIP2,EPHA3
Coexpression	M1373	GOTZMANN_EPITHELIAL_TO_MESENCHYMAL_TRANSITION_UP	C2:CGP: Chemical and Genetic Perturbations	2.344e-08	0.0002185	1.169e-06	1.136e-05	11	68	ACTA2,COL4A1,TEAD2,FN1,TNC,IGFBP7,CCN2,INHBA,GATA2,CDH2,SMAD1
GO: Biological Process	GO:0030036	actin cytoskeleton organization		2.365e-08	0.0001354	2.881e-06	2.659e-05	46	876	TPM1,TPM2,CTTNBP2,RHOJ,MYL9,ANLN,AMOTL2,PLS3,CNN1,CAP2,MRTFA,BIN1,SFRP1,MRAS,CDC42EP3,SMTN,RND3,ARHGDIB,TBCK,TTC17,CCN2,LIMCH1,PRKG1,MYADM,MYH11,GAS2,MARCKSL1,AIF1L,CYRIA,TAGLN,WASF1,SHANK1,DPYSL3,CALD1,STMN1,LCP1,LPAR1,RGS4,SDAD1,TGFB2,HMCN1,TJP1,PAK3,EPB41,PHLDB2,EPHA3
Coexpression Atlas	Facebase_RNAseq_e9.5_Olfactory Placode_2500_K2	FacebaseRNAseq_e9.5_Olfactory Placode_top-relative-expression-ranked_2500_k-means-cluster#2	FaceBase_RNAseq	2.443e-08	9.576e-05	2.776e-07	2.457e-06	38	655	PDE4D,RFTN2,SLITRK6,MARCHF4,COL6A3,COL9A2,SEPTIN5,OLFML2B,ZFP14,SP110,ARHGDIB,MOXD1,SCMH1,NSG1,OSR1,RASL11B,ATP2B4,DKK3,DKK2,GAS1,BGN,COL24A1,ST6GAL2,OLFML1,NFIB,NRK,CCDC3,ARHGEF9,EXOC6B,MAFB,KAZN,GPC2,GRIN3A,DNMT3A,CACNA1C,KRT7,HSD17B14,EPB41
Coexpression	M8544	GAUSSMANN_MLL_AF4_FUSION_TARGETS_F_UP	C2:CGP: Chemical and Genetic Perturbations	2.473e-08	0.0002305	1.226e-06	1.192e-05	17	184	ACTG2,RCBTB2,FST,CNN1,ISG15,OSR1,IL17RD,DKK3,GAS1,RBM26,NUAK1,WNK2,NT5E,RGS4,TTLL7,LTBP2,LY6E
Coexpression Atlas	gudmap_dev gonad_e12.5_F_VasAssocMesStromOvary_Sma_k3_500	dev gonad_e12.5_F_VasAssocMesStromOvary_Sma_k-means-cluster#3_top-relative-expression-ranked_500	Gudmap Mouse ST 1.0	2.484e-08	9.736e-05	2.814e-07	2.491e-06	15	116	FBN2,CNN1,RGS5,CCDC80,CRABP2,POSTN,NKD1,PRKG1,PARD6G,OLFML1,NRK,MAFB,KRT7,EGR2,CDH12
Coexpression	M41719	FAN_OVARY_CL17_PUTATIVE_APOPTOTIC_SMOOTH_MUSCLE_CELL	C8: Cell Type Signature	2.495e-08	0.0002326	1.231e-06	1.196e-05	19	231	TPM1,TPM2,ACTA2,MYL9,HSPA2,CNN1,COL4A1,RGS5,AKAP12,IGFBP7,ISG15,MYH11,MYLK,BGN,CCDC3,TAGLN,EDNRA,LMNA,PLEKHO1
Coexpression Atlas	gudmap_kidney_adult_JuxtaGlom_Ren1_Captopr_k1_200	kidney_adult_JuxtaGlom_Ren1_Captopr_k-means-cluster#1_top-relative-expression-ranked_200	Gudmap Mouse MOE430.2	2.659e-08	0.0001042	3.004e-07	2.659e-06	9	34	ACTA2,PLN,CNN1,RGS5,IGFBP7,SNCG,MYH11,KCNMB1,TAGLN
Coexpression	MM1231	ZHENG_GLIOBLASTOMA_PLASTICITY_UP	M2:CGP: Chemical and Genetic Perturbations	2.714e-08	0.000253	1.332e-06	1.294e-05	20	257	EPHB2,CDKN2A,E2F7,MCM5,TUBB3,FBN2,ANLN,WNT7A,DPYSL4,APLP1,RND3,UHRF1,MELK,ST6GAL2,BUB1,DUSP4,CDCA8,LSM12,C1orf198,MSANTD3-TMEFF1
Coexpression Atlas	gudmap_dev lower uro neuro_e14.5_BladdPelvicGanglion_Sox10_k2_1000	dev lower uro neuro_e14.5_BladdPelvicGanglion_Sox10_k-means-cluster#2_top-relative-expression-ranked_1000	Gudmap Mouse ST 1.0	2.734e-08	0.0001072	3.079e-07	2.725e-06	20	211	CSMD3,TUBB3,PCDH10,AKAP12,CRMP1,NSG1,SNRPN,GATA3,P4HA3,TUBB2B,SEPTIN6,NEFL,TSPAN17,TUBA1A,SYT11,ASTN2,NNAT,DPYSL3,RGS4,INA
Coexpression Atlas	gudmap_developingKidney_e11.5_metaneph mesench_100	DevelopingKidney_e11.5_metaneph mesench_emap-3843_top-relative-expression-ranked_100	Gudmap Mouse MOE430.2	2.775e-08	0.0001088	3.107e-07	2.751e-06	13	85	EYA4,CSRNP3,FOXC1,FOXC2,COL9A1,CRABP2,CRMP1,DCX,NEFL,GAL3ST4,TBX18,EGR2,CDH2
Coexpression Atlas	Facebase_ST1_e11.5_Emin_MedNasl_SingCel_100	e11.5_Emin_MedNasl_SingCel_top-relative-expression-ranked_100	FaceBase_ST1	2.775e-08	0.0001088	3.107e-07	2.751e-06	13	85	RHOJ,MMP11,FST,FOXC1,FOXC2,COL9A1,CDC42EP3,ARHGDIB,DKK1,GATA2,GATA3,BGN,NFIB
Coexpression Atlas	PCBC_ratio_EB UCB CD34+Z_vs_EB blastocyst_cfr-2X-p05	EB UCB CD34+Z_vs_EB blastocyst-Confounder_removed-fold2.0_adjp0.05	PCBC_AltAnalyze	2.794e-08	0.0001095	3.121e-07	2.762e-06	15	117	MAP2,TUBB3,PCYT1B,HTRA1,DOCK11,BRINP1,DCX,SEPTIN6,CYRIA,MAFB,NOVA2,PCDHGB6,INA,LY6H,ARHGAP19
Coexpression Atlas	Facebase_RNAseq_e10.5_Medial Nasal Eminence_2500_K4	FacebaseRNAseq_e10.5_Medial Nasal Eminence_top-relative-expression-ranked_2500_k-means-cluster#4	FaceBase_RNAseq	2.815e-08	0.0001103	3.135e-07	2.775e-06	41	744	PDE4D,RFTN2,SLITRK6,MARCHF4,COL6A3,COL9A2,SEPTIN5,OLFML2B,ZFP14,STIL,SP110,ARHGDIB,MOXD1,NSG1,OSR1,RASL11B,LIMCH1,ATP2B4,DKK3,DKK2,GATA2,BGN,COL24A1,ST6GAL2,OLFML1,NFIB,NRK,CCDC3,ARHGEF9,EXOC6B,MAFB,KAZN,GPC2,GRIN3A,CACNA1C,KRT7,CALD1,TFAP2A,THBS2,EGR2,HSD17B14
GO: Biological Process	GO:0048598	embryonic morphogenesis		2.864e-08	0.000164	3.417e-06	3.154e-05	56	1189	EPHB2,EYA4,MCC,HLX,MEIS2,FZD1,FBN2,HOXD11,ALDH1A3,SLITRK6,FST,PLS3,FOXC1,FOXC2,COL8A1,TEAD2,SFRP1,COL12A1,FN1,WNT7A,STIL,CRABP2,NKD1,DKK1,OSR1,MYADM,INHBA,GAS1,GATA2,GATA3,PARD6G,PTHLH,SULF1,MAFB,DLX2,TMEM231,CACNA1C,ZEB1,CALD1,CAMK2G,DUSP4,TFAP2A,LPAR1,GSK3B,EDNRA,NCS1,ZNF503,TGFB2,TBX18,SEMA3D,IFT52,GREM1,CDH2,SMAD1,PHLDB2,EPHA3
Coexpression Atlas	Arv_EB-LF_500	AravindRamakr_EmbryoidBody-LF_top-relative-expression-ranked_500	PCBC	2.882e-08	0.000113	3.201e-07	2.833e-06	32	496	CPA4,PENK,ACTA2,DACT2,ACTG2,SBK1,PLN,IGLON5,COL6A3,COL9A1,FN1,MOXD1,DKK2,H19,SERPINB7,INHBA,GDF10,DCX,BGN,ST6GAL2,OLFML1,NRK,DLX2,NNAT,NIPAL4,RGS4,TGFB2,THBS2,PWWP3B,GREM1,LY6H,EPHA3
Coexpression Atlas	BM Top 100 - stomach fundus	BM Top 100 - stomach fundus	Body Map	3e-08	0.0001176	3.323e-07	2.941e-06	12	71	TPM1,TPM2,ACTG2,MYL9,PLN,CNN1,COL6A3,CCDC80,POSTN,MYH11,TAGLN,PSCA
Coexpression Atlas	gudmap_developingGonad_e12.5_testes_k4_200	DevelopingGonad_e12.5_testes_emap-29069_k-means-cluster#4_top-relative-expression-ranked_200	Gudmap Mouse MOE430.2	3.011e-08	0.000118	3.325e-07	2.943e-06	7	17	SFSWAP,SNRPN,RBM26,TUBB2B,NFIB,NNAT,PCBP4
Coexpression	M39247	LAKE_ADULT_KIDNEY_C28_INTERSTITIUM	C8: Cell Type Signature	3.016e-08	0.0002811	1.472e-06	1.43e-05	12	86	TPM1,MEIS2,COL4A1,TNC,AKAP12,IGFBP7,SCMH1,PRKG1,RBMS3,CACNA1C,CALD1,UACA
Coexpression Atlas	Facebase_RNAseq_e10.5_Mandibular Arch_2500_K3	FacebaseRNAseq_e10.5_Mandibular Arch_top-relative-expression-ranked_2500_k-means-cluster#3	FaceBase_RNAseq	3.043e-08	0.0001193	3.35e-07	2.966e-06	44	834	PDE4D,BACH2,RFTN2,FZD1,SLITRK6,MARCHF4,COL9A1,COL9A2,RGS5,OLFML2B,ZFP14,STIL,SP110,POSTN,ARHGDIB,IGFBP7,OSR1,LIMCH1,ATP2B4,DKK3,DKK2,ARHGAP24,BGN,OLFML2A,COL24A1,ST6GAL2,OLFML1,NFIB,NRK,CCDC3,ARHGEF9,MAFB,KAZN,GPC2,GRIN3A,DNMT3A,CACNA1C,KRT7,THBS2,EGR2,PWWP3B,UBASH3B,HSD17B14,EPB41
Coexpression Atlas	gudmap_dev lower uro neuro_e14.5_BladdPelvicGanglion_Sox10_k1_100	dev lower uro neuro_e14.5_BladdPelvicGanglion_Sox10_k-means-cluster#1_top-relative-expression-ranked_100	Gudmap Mouse ST 1.0	3.065e-08	0.0001202	3.366e-07	2.979e-06	8	25	CRMP1,NSG1,GATA3,SYT11,SYT1,DPYSL3,RGS4,INA
Coexpression Atlas	Facebase_RNAseq_e9.5_Maxillary Arch_1000_K1	FacebaseRNAseq_e9.5_Maxillary Arch_top-relative-expression-ranked_1000_k-means-cluster#1	FaceBase_RNAseq	3.116e-08	0.0001222	3.412e-07	3.02e-06	27	371	PDE4D,ADCY2,SLITRK6,FOXC1,COL6A3,COL9A2,MRAS,CHODL,TNC,OLFML2B,SP110,IGFBP7,OSR1,LIMCH1,ATP2B4,DKK2,INHBA,GATA3,P4HA3,LAMP5,BGN,COL24A1,OLFML1,NRK,CCDC3,CACNA1C,KRT7
Coexpression Atlas	PCBC_EB_fibroblast_1000	Progenitor-Cell-Biology-Consortium_EmbryoidBody_from_inducedPluripotentialStemCells_derived from_from_fibroblast_top-relative-expression-ranked_1000	PCBC	3.132e-08	0.0001228	3.42e-07	3.027e-06	49	986	PENK,ACTA2,DACT2,ACTG2,SBK1,SEMA5B,HOXD11,UPK3A,PLN,IGLON5,COL6A3,COL9A1,FN1,WNT7A,SOSTDC1,POU3F1,POSTN,MOXD1,NKD1,NSG1,DLL3,OSR1,LYPD3,MIAT,DKK2,H19,SERPINB7,GAS1,BRINP1,PDE10A,GDF10,DCX,SULT1E1,NEFL,ANOS1,SULF1,MAFB,DLX2,KRT7,NIPAL4,TFAP2A,RGS4,TGFB2,SEMA3D,INA,GREM1,LY6H,EPHA3,RASD2
Coexpression	M3034	BERENJENO_TRANSFORMED_BY_RHOA_REVERSIBLY_DN	C2:CGP: Chemical and Genetic Perturbations	3.182e-08	0.0002966	1.545e-06	1.501e-05	8	30	ACTG2,FHL1,TNC,CCN2,INHBA,TAGLN,PBX3,PHLDB2
Coexpression Atlas	gudmap_developingLowerUrinaryTract_e14.5_ bladder_500	DevelopingLowerUrinaryTract_e14.5_ bladder_emap-30872_top-relative-expression-ranked_500	Gudmap Mouse MOE430.2	3.199e-08	0.0001254	3.482e-07	3.082e-06	29	421	ACTA2,ACTG2,UPK3A,SLITRK6,CNN1,PREPL,PDE5A,PRKG1,DKK3,MYH11,MYLK,GBP1,C11orf87,CYRIA,SULF1,NFIB,NRK,ST8SIA4,NIPAL4,CALD1,ACTR3B,RGS4,GSK3B,MSRB3,TGFB2,TBX18,SEMA3D,CDH2,RBFOX2
Coexpression Atlas	gudmap_developingLowerUrinaryTract_P1_ureter_500_k1	DevelopingLowerUrinaryTract_P1_ureter_emap-30363_k-means-cluster#1_top-relative-expression-ranked_500	Gudmap Mouse MOE430.2	3.206e-08	0.0001257	3.482e-07	3.082e-06	13	86	TPM2,ACTA2,ACTG2,MYL9,CNN1,POSTN,MYH11,MYLK,CYRIA,TAGLN,NT5E,THBS2,RASD2
Coexpression	M40270	DESCARTES_FETAL_PANCREAS_ENS_NEURONS	C8: Cell Type Signature	3.227e-08	0.0003008	1.551e-06	1.507e-05	16	165	PENK,PLPPR3,TUBB3,TUBB4A,PCDH10,ISLR2,DLL3,MIAT,FAM131B,TUBB2B,TUBA1A,SYT1,ASTN2,NNAT,DPYSL3,INA
Coexpression	M34012	BLANCO_MELO_COVID19_SARS_COV_2_INFECTION_CALU3_CELLS_UP	C2:CGP: Chemical and Genetic Perturbations	3.228e-08	0.000301	1.551e-06	1.507e-05	23	339	BACH2,TRPC4,TRIM22,AMOTL2,MARCHF4,COL4A1,SP110,IFIT1,AKAP12,LRRN3,ISG15,CCN2,SERPINB7,SAMD9,INHBA,GBP1,SLFN5,SYT1,IFI44L,EGR2,TNFAIP2,HSD17B14,PHLDB2
Coexpression Atlas	facebase_RNAseq_e10.5_OlfacPit_2500_K0	facebase_RNAseq_e10.5_OlfacPit_2500_K0	Gudmap RNAseq	3.248e-08	0.0001273	3.518e-07	3.113e-06	47	926	TTYH1,EYA4,MAP2,HSPBP1,REEP2,SBK1,TUBB4A,KIAA1549L,RAD54B,AMOTL2,RBM38,TRIM46,DPYSL4,APLP1,STIL,CRABP2,CRMP1,IL17RD,CCP110,GAS1,TUBB2B,MEIS3,DCX,NEFL,TUBA1A,SYT11,SULF1,STMN3,BUB1,KCNMB4,NKAIN1,WASF1,WNK2,NOVA2,GPC1,DPYSL3,DTNA,TAF1C,DUSP4,TAMALIN,LSM12,MRPL4,TGFB2,NARF,PAK3,CDH2,EPB41
Coexpression	M40228	DESCARTES_FETAL_LIVER_MESOTHELIAL_CELLS	C8: Cell Type Signature	3.254e-08	0.0003033	1.555e-06	1.512e-05	22	312	EPHB6,FOXC1,COL8A1,COL12A1,PODXL,WT1,CCDC80,ARL4D,NKD1,OSR1,HTRA1,SPOCK1,INHBA,GAS1,SULF1,GRIN3A,CTXN1,DDR1,KRT7,PIANP,LY6H,TPBG
Coexpression	M2256	MIYAGAWA_TARGETS_OF_EWSR1_ETS_FUSIONS_DN	C2:CGP: Chemical and Genetic Perturbations	3.288e-08	0.0003065	1.564e-06	1.52e-05	19	235	VGLL3,EYA4,MAP2,ACTG2,NREP,MEIS2,ALDH1A3,FST,COL8A1,CCDC80,CDC42EP3,DKK1,DCBLD2,SERPINB7,ADAM19,SYNC,RBMS3,EHBP1,ADAMTS5
Coexpression Atlas	gudmap_developingLowerUrinaryTract_e14.5_ Genital tubercle F_1000_k1	DevelopingLowerUrinaryTract_e14.5_ Genital tubercle F_emap-6706_k-means-cluster#1_top-relative-expression-ranked_1000	Gudmap Mouse MOE430.2	3.311e-08	0.0001298	3.575e-07	3.165e-06	19	193	EYA4,CTTNBP2,BACH2,UBE2E3,COL8A1,POGK,SPOCK1,GAS2,NEFL,SULF1,ST8SIA4,DPYSL3,PCDHB10,LPAR1,EDNRA,VASH2,SERTAD4,CDH2,EPHA3
Coexpression	M41744	RUBENSTEIN_SKELETAL_MUSCLE_PERICYTES	C8: Cell Type Signature	3.327e-08	0.0003101	1.574e-06	1.53e-05	15	144	TPM1,TPM2,ACTA2,MCAM,MYL9,COL4A1,COL6A3,RGS5,CRIP2,ARHGDIB,IGFBP7,SNCG,TUBA1A,TAGLN,CALD1
Coexpression Atlas	Facebase_RNAseq_e10.5_Neural Epithelium Overlying Central Eminence_2500_K2	FacebaseRNAseq_e10.5_Neural Epithelium Overlying Central Eminence_top-relative-expression-ranked_2500_k-means-cluster#2	FaceBase_RNAseq	3.333e-08	0.0001307	3.589e-07	3.177e-06	36	607	PDE4D,BACH2,RFTN2,MEIS2,SLITRK6,COL9A2,RGS5,OLFML2B,ZFP14,SP110,ARHGDIB,MOXD1,NSG1,OSR1,RASL11B,ATP2B4,DKK2,ARHGAP24,BGN,COL24A1,ST6GAL2,OLFML1,NFIB,NRK,BUB1,ARHGEF9,EXOC6B,MAFB,DLX2,KAZN,GPC2,GRIN3A,DNMT3A,CACNA1C,KRT7,EPB41
Coexpression Atlas	Facebase_RNAseq_e10.5_Neural Epithelium Flanking Eminence_1000	FacebaseRNAseq_e10.5_Neural Epithelium Flanking Eminence_top-relative-expression-ranked_1000	FaceBase_RNAseq	3.442e-08	0.0001349	3.697e-07	3.272e-06	49	989	EPHB2,TTYH1,SPNS1,EYA4,MAP2,TENM2,REEP2,TUBB4A,KIAA1549L,SEMA5B,PGAP1,FHL1,FST,MGAT5B,POGK,WNT7A,TUBB,ZFP14,POU3F1,APLP1,CRMP1,WDR47,SCUBE2,IGFBP7,DLL3,UHRF1,GATA3,TUBB2B,AIF1L,PDE10A,DCX,NEFL,SYT11,STMN3,WNK2,NOVA1,DPYSL3,MAMLD1,RFWD3,ZNF503,SOX21,INA,GPR137C,NAT10,PAK3,TOX2,CDH2,TPBG,EPHA3
Coexpression Atlas	gudmap_developingLowerUrinaryTract_e13.5_bladder mesenchyme_1000_k4	DevelopingLowerUrinaryTract_e13.5_bladder mesenchyme_emap-3087_k-means-cluster#4_top-relative-expression-ranked_1000	Gudmap Mouse MOE430.2	3.466e-08	0.0001359	3.712e-07	3.285e-06	20	214	MEIS2,FBN2,SLITRK6,MEX3B,COL8A1,LRP12,RND3,LIMCH1,ZC4H2,NEFL,SULF1,NFIB,NTM,SGCE,ST8SIA4,RGS4,TBX18,VASH2,PWWP3B,CDH2
Coexpression Atlas	gudmap_developingKidney_e15.5_Podocyte cells_200_k2	DevelopingKidney_e15.5_Podocyte cells_emap-27915_k-means-cluster#2_top-relative-expression-ranked_200	Gudmap Mouse MOE430.2	3.512e-08	0.0001377	3.752e-07	3.321e-06	9	35	EYA4,PENK,ACTG2,CNTN1,COL9A1,DKK3,MYH11,CYRIA,TBX18
Coexpression Atlas	gudmap_developingLowerUrinaryTract_P1_ureter_200	DevelopingLowerUrinaryTract_P1_ureter_emap-30363_top-relative-expression-ranked_200	Gudmap Mouse MOE430.2	3.575e-08	0.0001401	3.808e-07	3.37e-06	17	155	VGLL3,ACTA2,ACTG2,UPK3A,CNN1,RGS5,DKK3,MYH11,MYLK,GBP1,TAGLN,KRT7,NIPAL4,NT5E,MSRB3,TBX18,THBS2
Coexpression	M2779	BMI1_DN_MEL18_DN.V1_UP	C6: Oncogenic Signature	3.653e-08	0.0003405	1.711e-06	1.663e-05	15	145	CPA4,COL13A1,PODXL,ADAM19,INHBA,FJX1,PTHLH,NKAIN1,TAGLN,NT5E,LCP1,TGFB2,SLC7A5,GREM1,PLEKHO1
Coexpression	M45693	HE_LIM_SUN_FETAL_LUNG_C1_EARLY_TIP_CELL	C8: Cell Type Signature	3.653e-08	0.0003405	1.711e-06	1.663e-05	15	145	TPM2,TTYH1,CHST6,TUBB3,HSPA2,COL9A1,UHRF1,TCEAL7,GAS2,MELK,SYT11,GPC2,WASF1,CTXN1,CDCA8
GO: Biological Process	GO:0060322	head development		3.688e-08	0.0002112	4.31e-06	3.978e-05	59	1294	EPHB2,CTTNBP2,ADCY1,MEIS2,SBK1,FZD1,PGAP1,ALDH1A3,FST,MRTFA,CNTN1,FOXC1,COL4A1,COL8A1,SFRP1,FN1,NLGN4Y,WNT7A,POU3F1,APLP1,STIL,CRABP2,WDR47,DKK1,CELF1,PRKG1,CTNS,ATP2B4,INHBA,GAS1,GATA2,TUBB2B,MEIS3,GDF10,DCX,NEFL,TUBA1A,NFIB,SYT1,MAFB,DLX2,NNAT,ZEB1,TSC22D3,TFAP2A,LPAR1,RGS4,GSK3B,EDNRA,ZNF503,TGFB2,SEMA3D,INA,CDK2AP1,EGR2,PBX3,CDH2,SMAD1,RBFOX2
Coexpression	M38988	MEBARKI_HCC_PROGENITOR_WNT_UP_BLOCKED_BY_FZD8CRD	C2:CGP: Chemical and Genetic Perturbations	3.797e-08	0.0003539	1.77e-06	1.72e-05	14	125	EPHB2,MEX3B,MRTFA,FN1,ARHGDIB,MOXD1,MYADM,ST6GAL2,CCDC3,DPYSL3,LCP1,TGFB2,THBS2,SLC7A5
Coexpression Atlas	Facebase_RNAseq_e10.5_Olfactory Pit_2500_K4	FacebaseRNAseq_e10.5_Olfactory Pit_top-relative-expression-ranked_2500_k-means-cluster#4	FaceBase_RNAseq	3.887e-08	0.0001524	4.129e-07	3.655e-06	33	529	PDE4D,ACTG2,ADCY2,SLITRK6,MARCHF4,KIF17,COL6A3,COL9A2,MRAS,CHODL,TNC,SGCD,IGFBP7,DLL3,DKK3,INHBA,GAS2,GATA3,P4HA3,C11orf87,LAMP5,SLFN5,PDE10A,COL24A1,FBXL7,CCDC3,EXOC6B,GPC2,NT5E,THBS2,LMNA,LTBP2,HSD17B14
Coexpression Atlas	gudmap_developingKidney_e15.5_Ureteral Smooth Musc_1000_k4	DevelopingKidney_e15.5_Ureteral Smooth Musc_emap-28812_k-means-cluster#4_top-relative-expression-ranked_1000	Gudmap Mouse MOE430.2	3.911e-08	0.0001533	4.144e-07	3.668e-06	19	195	TPM2,EYA4,PENK,ADCY2,FZD1,FBN2,FST,CNTN1,COL6A3,AKAP12,POSTN,MOXD1,NKD1,GBP1,GDF10,NFIB,GRIN3A,THBS2,PBX3
Coexpression Atlas	gudmap_developingLowerUrinaryTract_e14.5_ urogenital sinus_1000_k1	DevelopingLowerUrinaryTract_e14.5_ urogenital sinus_emap-5517_k-means-cluster#1_top-relative-expression-ranked_1000	Gudmap Mouse MOE430.2	3.95e-08	0.0001548	4.173e-07	3.694e-06	15	120	EYA4,TENM2,SLITRK6,PCDH10,COL8A1,INHBA,SULF1,NTM,ST8SIA4,DPYSL3,EDNRA,TBX18,GREM1,CDH2,EPHA3
Coexpression Atlas	DevelopingLowerUrinaryTract_e14.5_ bladder_emap-6668_k3_500	DevelopingLowerUrinaryTract_e14.5_ bladder_emap-6668_k-means-cluster#3_top-relative-expression-ranked_500	Gudmap Mouse MOE430.2	4.147e-08	0.0001625	4.37e-07	3.868e-06	12	73	VGLL3,ACTA2,ACTG2,UPK3A,DKK3,MYH11,MYLK,GBP1,GLIPR1,NIPAL4,MSRB3,THBS2
Coexpression	M39049	MANNO_MIDBRAIN_NEUROTYPES_HENDO	C8: Cell Type Signature	4.254e-08	0.0003965	1.97e-06	1.914e-05	40	888	RAMP2,RHOJ,MCAM,HLX,RFTN2,PICALM,ARHGAP29,FKBP1A,HSPA2,PLS3,FOXC1,JCAD,STARD4,FN1,PODXL,ID3,AKAP12,SMTN,NKD1,IGFBP7,ISG15,CYYR1,ITPRIP,CCN2,IFI6,HTRA1,GATA2,IFI44L,UACA,TSC22D3,TAF1C,TAMALIN,MSRB3,SLC7A8,FRMD6,EGR2,TJP1,SLC7A5,HSD17B14,SMAD1
Coexpression Atlas	gudmap_developingLowerUrinaryTract_P2_bladder detrusor (LCM)_100	DevelopingLowerUrinaryTract_P2_bladder detrusor (LCM)_emap-30376_top-relative-expression-ranked_100	Gudmap Mouse MOE430.2	4.256e-08	0.0001668	4.473e-07	3.959e-06	13	88	TPM2,ACTA2,ACTG2,TENM2,MYL9,PLN,CNN1,MYH11,GBP1,TAGLN,NIPAL4,NT5E,MSRB3
Coexpression	M41679	TRAVAGLINI_LUNG_MESOTHELIAL_CELL	C8: Cell Type Signature	4.269e-08	0.000398	1.97e-06	1.914e-05	33	649	CPA4,EPHB6,RAMP2,TRAPPC5,MEIS2,FABP5,TUBB3,ALDH1A3,FST,MAP4K4,FKBP1A,FOXC1,PODXL,WT1,CCDC80,DKK1,NSG1,OSR1,DCBLD2,H19,GAS1,MARCKSL1,SULF1,DPYSL3,THAP9-AS1,DUSP4,STMN1,RGS4,SLC7A8,THBS2,LY6E,CDH2,TPBG
GO: Biological Process	GO:0007507	heart development		4.272e-08	0.0002446	4.892e-06	4.516e-05	52	1077	TPM1,EYA4,RAMP2,CADM4,ADCY2,MEIS2,FZD1,FBN2,FHL1,PLN,FKBP1A,FOXC1,FOXC2,TEAD2,FN1,SGCD,WT1,ID3,STIL,CRIP2,NKD1,DKK1,OSR1,TTC17,MYH11,ADAM19,INHBA,GATA2,GATA3,PARD6G,SEPTIN6,CACNA1C,CALD1,CAMK2G,CNTRL,ADAMTS5,CDCA8,TFAP2A,RGS4,GSK3B,EDNRA,TGFB2,TBX18,SEMA3D,IFT52,LMNA,GREM1,LY6E,CDH2,SMAD1,RBFOX2,EPHA3
Coexpression Atlas	gudmap_dev lower uro neuro_e14.5_PelvicGanglion_Sox10_k4_500	dev lower uro neuro_e14.5_PelvicGanglion_Sox10_k-means-cluster#4_top-relative-expression-ranked_500	Gudmap Mouse ST 1.0	4.328e-08	0.0001696	4.536e-07	4.015e-06	17	157	EYA4,RAMP2,PENK,ACTA2,FZD1,COL6A3,CCDC80,CRABP2,OSR1,GATA2,BRINP1,SULF1,GRIN3A,KRT7,LPAR1,EDNRA,HMCN1
Coexpression	MM947	PLASARI_TGFB1_SIGNALING_VIA_NFIC_1HR_DN	M2:CGP: Chemical and Genetic Perturbations	4.382e-08	0.0004085	2.012e-06	1.955e-05	13	107	TPM1,CADM4,CHODL,RGS5,SESN3,DPYSL4,SNCG,MYH11,TUBB2B,NFIB,NNAT,RGS4,RBFOX2
Coexpression	M2761	NAKAYAMA_SOFT_TISSUE_TUMORS_PCA2_UP	C2:CGP: Chemical and Genetic Perturbations	4.468e-08	0.0004165	2.042e-06	1.984e-05	12	89	HMMR,FZD1,FBN2,TNC,APLP1,INHBA,MELK,BUB1,CDCA8,SLC7A5,GREM1,TPBG
GO: Molecular Function	GO:0005201	extracellular matrix structural constituent		4.503e-08	3.841e-05	3.841e-05	0.0002814	19	189	FBN2,LTBP4,COL4A1,COL6A3,COL8A1,COL9A1,COL9A2,COL12A1,COL13A1,FN1,TNC,POSTN,IGFBP7,BGN,COL24A1,ANOS1,THBS2,HMCN1,LTBP2
Coexpression	M39271	HU_FETAL_RETINA_RPE	C8: Cell Type Signature	4.505e-08	0.00042	2.049e-06	1.991e-05	21	291	TPM1,TPM2,MYL9,ALDH1A3,PLS3,COL8A1,COL9A2,SFRP1,SESN3,ID3,SOSTDC1,CCDC80,IGFBP7,SULF1,CALD1,UACA,ZNF503,SLC7A8,CCBE1,SLC7A5,HSD17B14
GO: Biological Process	GO:0001654	eye development		4.566e-08	0.0002615	5.127e-06	4.732e-05	44	836	EPHB2,RHOJ,CADM4,MEIS2,FABP5,FBN2,ALDH1A3,SLITRK6,KIF17,FOXC1,FOXC2,COL4A1,COL8A1,SFRP1,FN1,WNT7A,WT1,NKD1,CELF1,UHRF1,CTNS,ATP2B4,MIAT,DKK3,INHBA,GAS1,GATA3,FJX1,MARCKSL1,MEIS3,DCX,NFIB,NECTIN1,MAFB,DLX2,TMEM231,CACNA1C,ZEB1,TFAP2A,ZNF503,TGFB2,SOX21,PBX3,CDH2
Coexpression Atlas	gudmap_dev gonad_e13.5_M_gudmap_devVasTestis_Flk_1000	dev gonad_e13.5_M_DevVasTestis_Flk_top-relative-expression-ranked_1000	Gudmap Mouse ST 1.0	4.593e-08	0.0001801	4.802e-07	4.25e-06	44	846	RAMP2,RHOJ,MCAM,HLX,RFTN2,ABCA9,ARHGAP31,ARHGAP29,MAP4K4,LTBP4,COL4A1,JCAD,BIN1,SFRP1,STARD4,CDC42EP3,CRIP2,SMTN,ARHGDIB,IGFBP7,CYYR1,LIMCH1,ATP2B4,H19,ADAM19,INHBA,DOCK11,SLFN5,FBXL7,NRK,NECTIN1,ARHGEF9,ST8SIA4,DPYSL3,UACA,PLXDC1,LCP1,TAMALIN,EDNRA,SLC7A8,HMCN1,TJP1,PAK3,SLC7A5
Coexpression Atlas	gudmap_dev lower uro neuro_e15.5_PelvicGanglion_Sox10_k4_1000	dev lower uro neuro_e15.5_PelvicGanglion_Sox10_k-means-cluster#4_top-relative-expression-ranked_1000	Gudmap Mouse ST 1.0	4.648e-08	0.0001822	4.846e-07	4.289e-06	22	261	EYA4,PENK,ACTA2,MEIS2,FBN2,COL6A3,COL8A1,COL12A1,FN1,CRABP2,MOXD1,OSR1,PDE5A,BRINP1,GDF10,OLFML1,SULF1,GRIN3A,LPAR1,EDNRA,THBS2,HMCN1
Coexpression Atlas	Facebase_RNAseq_e8.5_Paraxial Mesoderm_1000_K2	FacebaseRNAseq_e8.5_Paraxial Mesoderm_top-relative-expression-ranked_1000_k-means-cluster#2	FaceBase_RNAseq	4.674e-08	0.0001832	4.86e-07	4.302e-06	25	330	EYA4,PDE4D,SLITRK6,COL6A3,COL9A2,OLFML2B,SOSTDC1,ZFP14,SP110,POSTN,OSR1,ATP2B4,DKK2,P4HA3,BGN,COL24A1,ST6GAL2,OLFML1,NFIB,NRK,CCDC3,MAFB,CACNA1C,KRT7,THBS2
GO: Biological Process	GO:0051216	cartilage development		4.688e-08	0.0002684	5.162e-06	4.765e-05	27	374	HOXD11,FOXC1,FOXC2,COL9A1,FN1,WNT7A,SCUBE2,OSR1,CCN2,DCHS2,GATA3,MARCKSL1,PTHLH,BGN,RBMS3,SULF1,NFIB,DLX2,ZEB1,TFAP2A,LPAR1,EDNRA,TGFB2,SEMA3D,GREM1,CDH2,SMAD1
Coexpression	M4500	DACOSTA_UV_RESPONSE_VIA_ERCC3_DN	C2:CGP: Chemical and Genetic Perturbations	4.696e-08	0.0004377	2.125e-06	2.065e-05	39	856	EPHB2,HMMR,NREP,PICALM,MEIS2,ARHGAP29,CAP2,MRTFA,COL8A1,PODXL,ID3,STIL,DKK1,GIGYF2,CCN2,ATP2B4,MELK,DENND2B,FBXL7,NUAK1,NFIB,KAZN,WASF1,RAB6A,EHBP1,ZEB1,SASH1,DUSP4,MAMLD1,LPAR1,GSK3B,TGFB2,THBS2,TLE4,R3HDM1,PBX3,CDH2,RBFOX2,ARHGAP19
Coexpression	M17572	SMID_BREAST_CANCER_LUMINAL_B_DN	C2:CGP: Chemical and Genetic Perturbations	4.763e-08	0.000444	2.145e-06	2.084e-05	31	587	TTYH1,CDKN2A,ACTG2,MCM5,TRIM29,ADCY2,FABP5,ALDH1A3,FHL1,UBE2E3,FOXC1,BIN1,SFRP1,MRAS,CHODL,TNC,SOSTDC1,RND3,DKK1,NSG1,CCN2,MYH11,MYLK,GBP1,CYRIA,NFIB,TAGLN,GLIPR1,KRT7,CALD1,ZNF532
Coexpression Atlas	gudmap_developingGonad_e11.5_testes and mesonephros_k3_200	DevelopingGonad_e11.5_testes and mesonephros_emap-3226_k-means-cluster#3_top-relative-expression-ranked_200	Gudmap Mouse MOE430.2	4.837e-08	0.0001896	5.017e-07	4.44e-06	7	18	TUBB3,DPYSL4,TUBB2B,NEFL,SYT11,PCBP4,DPYSL3
Coexpression Atlas	gudmap_developingLowerUrinaryTract_e13.5_bladder neck-urethr epithel_500_k2	DevelopingLowerUrinaryTract_e13.5_bladder neck-urethr epithel_emap-30875_k-means-cluster#2_top-relative-expression-ranked_500	Gudmap Mouse MOE430.2	4.855e-08	0.0001903	5.022e-07	4.445e-06	12	74	EYA4,TENM2,PCDH10,UBE2E3,COL8A1,RND3,MOXD1,PARD6G,NTM,TFAP2A,SERTAD4,TPBG
Coexpression Atlas	Facebase_RNAseq_e8.5_Floor Plate_1000_K2	FacebaseRNAseq_e8.5_Floor Plate_top-relative-expression-ranked_1000_k-means-cluster#2	FaceBase_RNAseq	4.946e-08	0.0001939	5.102e-07	4.516e-06	15	122	TTYH1,MAP2,REEP2,TUBB3,MAP4K4,MGAT5B,POU3F1,DLL3,MYCL,SYT11,DTNA,GAL3ST4,TLE4,TOX2,PLEKHO1
Coexpression Atlas	facebase_RNAseq_e10.5_OlfacPit_2500	facebase_RNAseq_e10.5_OlfacPit_2500	Gudmap RNAseq	4.996e-08	0.0001958	5.14e-07	4.55e-06	63	1453	TTYH1,EYA4,MAP2,CADM4,HSPBP1,TRIM29,REEP2,SBK1,TUBB4A,KIAA1549L,PROM2,RAD54B,ALDH1A3,AMOTL2,RBM38,TRIM46,WT1,SOSTDC1,DPYSL4,APLP1,STIL,CRABP2,CRMP1,RAB15,CCN2,IL17RD,MYCL,CCP110,GAS1,GATA3,TUBB2B,MEIS3,DCX,NEFL,TUBA1A,SYT11,SULF1,STMN3,NECTIN1,BUB1,KCNMB4,NKAIN1,NNAT,PCBP4,WASF1,WNK2,NOVA2,GPC1,DPYSL3,DTNA,TAF1C,DUSP4,TAMALIN,RGS4,LSM12,MRPL4,TGFB2,NARF,PAK3,TNFAIP2,TOX2,CDH2,EPB41
GO: Biological Process	GO:0150063	visual system development		5.06e-08	0.0002898	5.467e-06	5.046e-05	44	839	EPHB2,RHOJ,CADM4,MEIS2,FABP5,FBN2,ALDH1A3,SLITRK6,KIF17,FOXC1,FOXC2,COL4A1,COL8A1,SFRP1,FN1,WNT7A,WT1,NKD1,CELF1,UHRF1,CTNS,ATP2B4,MIAT,DKK3,INHBA,GAS1,GATA3,FJX1,MARCKSL1,MEIS3,DCX,NFIB,NECTIN1,MAFB,DLX2,TMEM231,CACNA1C,ZEB1,TFAP2A,ZNF503,TGFB2,SOX21,PBX3,CDH2
Coexpression Atlas	gudmap_developingGonad_e11.5_ovary + mesonephros_k1_1000	DevelopingGonad_e11.5_ovary + mesonephros_emap-3226_k-means-cluster#1_top-relative-expression-ranked_1000	Gudmap Mouse MOE430.2	5.223e-08	0.0002047	5.36e-07	4.744e-06	17	159	TPM1,HMMR,MEIS2,CSRNP3,MEX3B,FOXC1,FOXC2,COL9A1,STARD4,RGS5,RND3,DKK1,RBM26,ST6GAL2,LSM12,TBX18,CDH2
Coexpression	M45703	HE_LIM_SUN_FETAL_LUNG_C1_MID_BASAL_CELL	C8: Cell Type Signature	5.267e-08	0.000491	2.361e-06	2.294e-05	15	149	TRIM29,REEP2,SLITRK6,FHL1,HSPA2,CNTN1,SOSTDC1,DKK3,SULT1E1,NUAK1,MAFB,DPYSL3,TFAP2A,NCS1,SERTAD4
Coexpression Atlas	gudmap_developingKidney_e13.5_podocyte cells_500	DevelopingKidney_e13.5_podocyte cells_emap-27773_top-relative-expression-ranked_500	Gudmap Mouse MOE430.2	5.32e-08	0.0002086	5.445e-07	4.82e-06	29	431	VGLL3,EYA4,TENM2,ABCA9,CSRNP3,CNTN1,FOXC1,FOXC2,COL13A1,PODXL,WT1,POU3F1,CRMP1,POSTN,DKK1,CYYR1,DKK2,SPOCK1,GDF10,DCX,NEFL,NTM,CCDC3,MAFB,GRIN3A,GAL3ST4,TBX18,VASH2,TNFAIP2
Coexpression	M2451	PLASARI_TGFB1_SIGNALING_VIA_NFIC_1HR_DN	C2:CGP: Chemical and Genetic Perturbations	5.482e-08	0.000511	2.445e-06	2.376e-05	13	109	TPM1,CADM4,CHODL,RGS5,SESN3,DPYSL4,SNCG,MYH11,TUBB2B,NFIB,NNAT,RGS4,RBFOX2
Coexpression	MM472	BERENJENO_TRANSFORMED_BY_RHOA_REVERSIBLY_DN	M2:CGP: Chemical and Genetic Perturbations	5.547e-08	0.0005171	2.462e-06	2.393e-05	8	32	ACTG2,FHL1,TNC,CCN2,INHBA,TAGLN,PBX3,PHLDB2
Coexpression Atlas	gudmap_kidney_adult_JuxtaGlom_Ren1_k1_1000	kidney_adult_JuxtaGlom_Ren1_k-means-cluster#1_top-relative-expression-ranked_1000	Gudmap Mouse MOE430.2	5.605e-08	0.0002197	5.722e-07	5.065e-06	13	90	ACTA2,MYL9,FHL1,PLN,CNN1,RGS5,IGFBP7,SNCG,DKK2,MYH11,GATA3,CCDC3,TAGLN
Coexpression Atlas	gudmap_developingKidney_e14.5 whole kidney - Wnt4 KO_200	DevelopingKidney_e14.5 whole kidney - Wnt4 KO_emap-6674_top-relative-expression-ranked_200	Gudmap Mouse MOE430.2	5.731e-08	0.0002247	5.805e-07	5.138e-06	17	160	MEIS2,CSRNP3,SFRP1,PDE5A,DCX,SULF1,NFIB,NTM,CALD1,LSM12,TGFB2,TBX18,SEMA3D,HMCN1,SERTAD4,LY6H,CDH2
Coexpression Atlas	gudmap_developingKidney_e11.5_metaneph mesench_200	DevelopingKidney_e11.5_metaneph mesench_emap-3843_top-relative-expression-ranked_200	Gudmap Mouse MOE430.2	5.731e-08	0.0002247	5.805e-07	5.138e-06	17	160	EYA4,MCM5,CSRNP3,FOXC1,FOXC2,COL9A1,CRABP2,CRMP1,MOXD1,DKK1,DCX,NEFL,GAL3ST4,TBX18,EGR2,CDH2,TPBG
Coexpression Atlas	gudmap_developingLowerUrinaryTract_adult_bladder_200	DevelopingLowerUrinaryTract_adult_bladder_emap-29457_top-relative-expression-ranked_200	Gudmap Mouse MOE430.2	5.731e-08	0.0002247	5.805e-07	5.138e-06	17	160	VGLL3,ACTA2,ACTG2,PROM2,UPK3A,PLN,CNN1,CAP2,SCUBE2,MYH11,MYLK,GBP1,PTHLH,TAGLN,NIPAL4,NT5E,TTLL7
Coexpression	M4665	BAELDE_DIABETIC_NEPHROPATHY_DN	C2:CGP: Chemical and Genetic Perturbations	5.847e-08	0.000545	2.583e-06	2.51e-05	26	437	TRIM22,MYL9,HSPA2,PLS3,FOXC1,TOM1L2,PODXL,WT1,IFIT1,CDC42EP3,PREPL,POSTN,IGFBP7,ISG15,CCN2,HTRA1,MYLK,SPOCK1,GAS1,SEPTIN2,SULF1,DPYSL3,CALD1,TSC22D3,TLE4,ARHGAP19
Coexpression Atlas	GSM777037_500	Stromal Cells, BEC.SLN, gp38- CD31+, Lymph Node, avg-4	Immgen.org, GSE15907	5.937e-08	0.0002327	5.998e-07	5.309e-06	30	459	RAMP2,RHOJ,PENK,MCAM,HLX,EHD3,ARHGAP31,ARHGAP29,LTBP4,PLS3,COL4A1,SEMA3F,JCAD,RGS5,PODXL,CRIP2,IGFBP7,CYYR1,CCN2,BGN,OLFML2A,SULF1,NFIB,DPYSL3,SASH1,UACA,TAMALIN,TTLL7,TJP1,LTBP2
Coexpression Atlas	Arv_EB-LF_1000_K2	AravindRamakr_EmbryoidBody-LF_top-relative-expression-ranked_1000_k-means-cluster#2	PCBC	6.364e-08	0.0002495	6.413e-07	5.676e-06	19	201	VGLL3,SBK1,EVA1A,PDZD4,COL6A3,FN1,CCDC80,NLRP2,POSTN,MOXD1,OSR1,P4HA3,BGN,OLFML1,SULF1,RGS4,PLEKHG4B,THBS2,GREM1
Coexpression Atlas	BM Top 100 - vagina	BM Top 100 - vagina	Body Map	6.606e-08	0.0002589	6.639e-07	5.877e-06	12	76	ACTA2,ACTG2,TRIM29,MYL9,PLN,CNN1,COL6A3,CCDC80,MYH11,TAGLN,EDNRA,GREM1
Coexpression Atlas	Facebase_ST1_e10.5_NeuroEpith_CentrlOverEmin_500	e10.5_NeuroEpith_CentrlOverEmin_top-relative-expression-ranked_500	FaceBase_ST1	6.65e-08	0.0002607	6.667e-07	5.901e-06	28	410	TTYH1,RFTN2,KATNAL1,REEP2,CNOT6,PGAP1,PLS3,CAP2,MRAS,CLDND1,DPYSL4,APLP1,CRMP1,RND3,GLIPR2,TUBB2B,MELK,SEPTIN2,TSPAN17,SYT11,SULF1,STMN3,DDR1,SOX21,INA,PAK3,PBX3,CDH2
Coexpression Atlas	gudmap_dev lower uro neuro_e15.5_PelvicGanglion_Sox10_k1_500	dev lower uro neuro_e15.5_PelvicGanglion_Sox10_k-means-cluster#1_top-relative-expression-ranked_500	Gudmap Mouse ST 1.0	6.87e-08	0.0002693	6.869e-07	6.08e-06	15	125	CSMD3,TUBB3,CRMP1,POSTN,SNRPN,GATA3,TUBB2B,DCX,NEFL,SYT11,NRK,SYT1,NOVA1,DPYSL3,INA
Coexpression Atlas	gudmap_developingLowerUrinaryTract_P2_bladder stroma (LCM)_200	DevelopingLowerUrinaryTract_P2_bladder stroma (LCM)_emap-30396_top-relative-expression-ranked_200	Gudmap Mouse MOE430.2	6.886e-08	0.0002699	6.869e-07	6.08e-06	17	162	ACTA2,ACTG2,CSMD3,ABCA9,UPK3A,COL8A1,CHODL,CYYR1,DKK3,MYH11,HTRA1,GBP1,C11orf87,NIPAL4,ADAMTS5,THBS2,LMNA
Coexpression	M41662	TRAVAGLINI_LUNG_ARTERY_CELL	C8: Cell Type Signature	6.904e-08	0.0006436	3.036e-06	2.95e-05	14	131	LTBP4,FN1,CDC42EP3,RND3,ARHGDIB,CYYR1,IFI6,DKK2,AIF1L,SULF1,KCNMB4,IFI44L,STMN1,TOX2
Coexpression	MM3825	TABULA_MURIS_SENIS_SUBCUTANEOUS_ADIPOSE_TISSUE_MESENCHYMAL_STEM_CELL_OF_ADIPOSE_AGEING	M8: Cell Type Signature	6.944e-08	0.0006474	3.039e-06	2.953e-05	20	272	RAMP2,PENK,DACT2,MMP11,LTBP4,SFRP1,CRIP2,AKAP12,MANBAL,NSG1,OSR1,RBM26,GATA3,AIF1L,BGN,NFIB,MAFB,TAMALIN,GSK3B,LMNA
Coexpression Atlas	gudmap_developingLowerUrinaryTract_P2_bladder detrusor (LCM)_1000_k2	DevelopingLowerUrinaryTract_P2_bladder detrusor (LCM)_emap-30376_k-means-cluster#2_top-relative-expression-ranked_1000	Gudmap Mouse MOE430.2	7.028e-08	0.0002755	6.992e-07	6.189e-06	25	337	TPM2,TRAF5,PDE4D,ACTA2,TENM2,PLN,CAP2,CDC42EP3,ARL4D,PDE5A,DKK3,MYLK,BGN,CYRIA,TSPAN17,ARHGEF9,CACNA1C,DTNA,ADAMTS8,ACTR3B,MSRB3,TBX18,THBS2,LMNA,PLEKHO1
Coexpression Atlas	facebase_RNAseq_e14.5_palate_poster_nasal_Tgfbr2_WT_2500_K0	facebase_RNAseq_e14.5_palate_poster_nasal_Tgfbr2_WT_2500_K0	Gudmap RNAseq	7.096e-08	0.0002781	7.042e-07	6.233e-06	18	182	ACTA2,ABCA9,MYL9,COL12A1,OLFML2B,CCDC80,CDC42EP3,CCN2,PRKG1,SNCG,DKK2,HTRA1,MYLK,GDF10,BGN,NT5E,RGS4,C1orf198
Coexpression	M4391	PEREZ_TP53_TARGETS	C2:CGP: Chemical and Genetic Perturbations	7.162e-08	0.0006677	3.12e-06	3.032e-05	48	1201	TRAF5,CNTNAP3,MCC,ADCY1,FZD1,PGAP1,TBC1D14,MMP11,MEX3B,FOXC1,AGAP3,FOXC2,COL13A1,WNT7A,DPYSL4,IFIT1,CRIP2,WDR47,MOXD1,ZKSCAN1,ISG15,NSG1,GLIPR2,H19,GATA2,GATA3,BRINP1,PDE10A,CYRIA,NUAK1,NRK,KLRK1-AS1,TMCC2,CCDC3,MAFB,KAZN,NIPAL4,ZFP90,TSC22D3,CAMK2G,ADAMTS5,CBFA2T3,EDNRA,VASH2,DHRS2,TOX2,EPB41,ARHGAP19
Coexpression	M5215	GSE360_T_GONDII_VS_B_MALAYI_HIGH_DOSE_DC_UP	C7:IMMUNESIGDB: ImmuneSigDB	7.287e-08	0.0006793	3.16e-06	3.07e-05	17	198	TRAF5,ASIC2,ACTG2,REEP2,TUBB4A,COL6A3,COL9A2,IGFBP7,FAM131B,B4GALNT1,GBP1,CYRIA,SYT1,TSC22D3,DUSP4,LTBP2,TNFAIP2
Coexpression Atlas	gudmap_developingLowerUrinaryTract_e13.5_bladder neck-urethr epithel_1000	DevelopingLowerUrinaryTract_e13.5_bladder neck-urethr epithel_emap-30875_top-relative-expression-ranked_1000	Gudmap Mouse MOE430.2	7.314e-08	0.0002867	7.24e-07	6.408e-06	42	800	VGLL3,EYA4,TRIM29,TENM2,PROM2,SLITRK6,FST,PCDH10,HSPA2,UBE2E3,PCYT1B,KLF11,COL8A1,POGK,WNT7A,IFIT1,CDC42EP3,RND3,MOXD1,LYPD3,RAB15,CCN2,MYCL,GATA3,PARD6G,ST6GAL2,CYRIA,NTM,ZBTB21,DLX2,GRIN3A,KRT7,TFAP2A,SEMA3D,SOX21,EGR2,ENTPD3,SERTAD4,PAK3,TNFAIP2,TPBG,ARMH4
Coexpression Atlas	Facebase_RNAseq_ratio_e10.5_MaxillaryArch_vs_Mandibular_500	FacebaseRNAseq_ratio_e10.5_MaxillaryArch_vs_Mandibular_top-relative-expression-ranked_500	FaceBase_RNAseq	7.416e-08	0.0002907	7.322e-07	6.481e-06	31	490	EPHB6,PDE4D,MAP2,PENK,ACTG2,PGAP1,MARCHF4,FKBP1A,MGAT5B,PCYT1B,POSTN,ARHGDIB,MANBAL,ZNF43,GATA3,P4HA3,C11orf87,PDE10A,ARHGEF9,KAZN,GPC2,TMEM231,GAL3ST4,LMNA,CCBE1,TLE4,PAK3,LTBP2,LY6E,SENP7,TPBG
Coexpression	M41708	FAN_OVARY_CL6_PUTATIVE_EARLY_ATRETIC_FOLLICLE_THECAL_CELL_2	C8: Cell Type Signature	7.574e-08	0.000706	3.269e-06	3.176e-05	21	300	TPM1,TPM2,ACTA2,MYL9,LTBP4,COL6A3,FN1,ID3,CCDC80,AKAP12,ARL4D,IFI6,MYADM,HTRA1,MYLK,BGN,TUBA1A,SGCE,TAGLN,CALD1,TSC22D3
GO: Biological Process	GO:0061448	connective tissue development		7.665e-08	0.0004389	8.127e-06	7.502e-05	31	485	ACTA2,HOXD11,FOXC1,FOXC2,COL9A1,FN1,WNT7A,WT1,SCUBE2,OSR1,CCN2,SERPINB7,DCHS2,GATA3,MARCKSL1,PTHLH,BGN,RBMS3,SULF1,NFIB,DLX2,ZEB1,TFAP2A,LPAR1,EDNRA,TGFB2,SEMA3D,LMNA,GREM1,CDH2,SMAD1
Coexpression Atlas	gudmap_developingLowerUrinaryTract_P2_bladder stroma (LCM)_500_k5	DevelopingLowerUrinaryTract_P2_bladder stroma (LCM)_emap-30396_k-means-cluster#5_top-relative-expression-ranked_500	Gudmap Mouse MOE430.2	7.676e-08	0.0003009	7.561e-07	6.692e-06	12	77	ACTA2,ACTG2,FHL1,CNN1,CHODL,MYH11,BGN,TAGLN,NIPAL4,NT5E,THBS2,LMNA
Coexpression	M7553	GSE21546_WT_VS_SAP1A_KO_AND_ELK1_KO_ANTI_CD3_STIM_DP_THYMOCYTES_UP	C7:IMMUNESIGDB: ImmuneSigDB	7.843e-08	0.0007311	3.369e-06	3.274e-05	17	199	ACTG2,NREP,PICALM,EHD3,HOXD11,FOXC1,WDR47,RND3,LRRN3,TBCK,DKK2,MYADM,ADAM19,SYT1,TAGLN,PCDHB10,LCP1
Coexpression Atlas	Facebase_RNAseq_e10.5_Neural Epithelium Overlying Central Eminence_1000_K3	FacebaseRNAseq_e10.5_Neural Epithelium Overlying Central Eminence_top-relative-expression-ranked_1000_k-means-cluster#3	FaceBase_RNAseq	7.879e-08	0.0003089	7.741e-07	6.852e-06	25	339	TTYH1,MAP2,BACH2,TUBB3,CSRNP3,MGAT5B,IGLON5,POU3F1,CRMP1,RND3,TAF9B,FJX1,DCX,SYT11,SULF1,STMN3,ZNF558,ASTN2,DLX2,NNAT,WNK2,DTNA,GAL3ST4,TOX2,SENP7
Coexpression Atlas	gudmap_dev gonad_e12.5_M_gudmap_devVasTestis_Flk_500	dev gonad_e12.5_M_DevVasTestis_Flk_top-relative-expression-ranked_500	Gudmap Mouse ST 1.0	8.146e-08	0.0003193	7.983e-07	7.066e-06	28	414	RAMP2,RHOJ,MCAM,HLX,RFTN2,ARHGAP31,ARHGAP29,COL4A1,JCAD,STARD4,CDC42EP3,CRIP2,CRMP1,ARHGDIB,CYYR1,LIMCH1,SNCG,DKK2,H19,ADAM19,DOCK11,ST8SIA4,DPYSL3,UACA,LCP1,HMCN1,TJP1,PAK3
Coexpression	M1796	ZHENG_GLIOBLASTOMA_PLASTICITY_UP	C2:CGP: Chemical and Genetic Perturbations	8.256e-08	0.0007696	3.53e-06	3.431e-05	19	249	EPHB2,CDKN2A,E2F7,MCM5,TUBB3,FBN2,ANLN,WNT7A,DPYSL4,APLP1,RND3,UHRF1,MELK,ST6GAL2,BUB1,DUSP4,CDCA8,LSM12,C1orf198
Coexpression	M9215	GSE40666_WT_VS_STAT1_KO_CD8_TCELL_WITH_IFNA_STIM_90MIN_DN	C7:IMMUNESIGDB: ImmuneSigDB	8.437e-08	0.0007865	3.591e-06	3.49e-05	17	200	EPHB6,MAP2,MCM5,FABP5,TUBB3,LMF1,TUBB,RASL11B,PARD6G,MELK,IFI44L,DNMT3A,CDCA8,GSK3B,LMNA,EGR2,PLEKHO1
Coexpression Atlas	PCBC_ratio_EB_from-OSKM-L_vs_EB_from-ESC_cfr-2X-p05	Embryoid Body Cells-reprogram_OSKM-L_vs_Embryoid Body Cells-reprogram_NA-Confounder_removed-fold2.0_adjp0.05	PCBC_AltAnalyze	8.521e-08	0.000334	8.309e-07	7.355e-06	23	293	EYA4,MAP2,SBK1,TUBB3,PLN,MGAT5B,DPYSL4,APLP1,NLRP2,CRMP1,NSG1,SNCG,MIAT,SPOCK1,BRINP1,DCX,STMN3,NOVA1,NOVA2,CTXN1,INA,LY6H,ARHGAP19
Coexpression Atlas	PCBC_ratio_EB_from-mRNA_vs_EB_from-ESC_cfr-2X-p05	Embryoid Body Cells-method_mRNA_vs_Embryoid Body Cells-method_NA-Confounder_removed-fold2.0_adjp0.05	PCBC_AltAnalyze	8.521e-08	0.000334	8.309e-07	7.355e-06	23	293	EYA4,MAP2,SBK1,TUBB3,PLN,MGAT5B,DPYSL4,APLP1,NLRP2,CRMP1,NSG1,SNCG,MIAT,SPOCK1,BRINP1,DCX,STMN3,NOVA1,NOVA2,CTXN1,INA,LY6H,ARHGAP19
Coexpression	M39170	MURARO_PANCREAS_DELTA_CELL	C8: Cell Type Signature	8.795e-08	0.0008198	3.727e-06	3.621e-05	19	250	CDKN2A,MAP2,MCC,TENM2,SESN3,POU3F1,PREPL,AKAP12,ARL4D,ZKSCAN1,NSG1,NUAK1,SYT1,ST8SIA4,DPYSL3,PAK3,SLC7A5,DHRS2,PBX3
GO: Biological Process	GO:0090287	regulation of cellular response to growth factor stimulus		8.858e-08	0.0005072	9.222e-06	8.512e-05	30	462	CADM4,FAM89B,NREP,FZD1,FBN2,FST,FKBP1A,LTBP4,FOXC1,FOXC2,JCAD,SFRP1,SOSTDC1,SCUBE2,DKK1,RASL11B,IL17RD,ATP2B4,DKK3,HTRA1,GATA3,RBMS3,SULF1,WASF1,GPC1,ZEB1,TSC22D3,DUSP4,CCBE1,GREM1
Coexpression Atlas	gudmap_developingGonad_e11.5_ovary + mesonephros_k3_1000	DevelopingGonad_e11.5_ovary + mesonephros_emap-3226_k-means-cluster#3_top-relative-expression-ranked_1000	Gudmap Mouse MOE430.2	8.914e-08	0.0003494	8.67e-07	7.674e-06	14	110	SBK1,TUBB3,DPYSL4,CRABP2,CRMP1,DLL3,SNCG,MIAT,DCX,NEFL,STMN3,PCBP4,DPYSL3,RGS4
Coexpression Atlas	gudmap_developingLowerUrinaryTract_e14.5_ urethra_200	DevelopingLowerUrinaryTract_e14.5_ urethra_emap-30892_top-relative-expression-ranked_200	Gudmap Mouse MOE430.2	9.021e-08	0.0003536	8.753e-07	7.748e-06	17	165	ACTG2,TENM2,SLITRK6,CAP2,SEMA3F,TNC,ZKSCAN1,CYYR1,MYH11,MYLK,SPOCK1,NEFL,ST8SIA4,TFAP2A,ENTPD3,RBFOX2,EPHA3
Coexpression Atlas	Facebase_RNAseq_e8.5_Floor Plate_500	FacebaseRNAseq_e8.5_Floor Plate_top-relative-expression-ranked_500	FaceBase_RNAseq	9.305e-08	0.0003648	8.999e-07	7.965e-06	31	495	TTYH1,MAP2,ACTA2,REEP2,TUBB3,TUBB4A,KIAA1549L,FHL1,MGAT5B,SFRP1,RGS5,PODXL,POU3F1,CCDC80,SCUBE2,DKK1,DLL3,SNRPN,CCP110,C11orf87,SYT11,NOVA1,DTNA,GAL3ST4,ZNF503,SOX21,INA,TLE4,PAK3,GREM1,TOX2
Coexpression Atlas	Facebase_RNAseq_e8.5_Paraxial Mesoderm_500_K3	FacebaseRNAseq_e8.5_Paraxial Mesoderm_top-relative-expression-ranked_500_k-means-cluster#3	FaceBase_RNAseq	9.32e-08	0.0003654	8.999e-07	7.965e-06	21	249	ADCY2,SLITRK6,FOXC1,COL6A3,CHODL,TNC,SP110,IGFBP7,OSR1,ATP2B4,DKK2,INHBA,P4HA3,COL24A1,OLFML1,NFIB,NRK,CCDC3,CACNA1C,KRT7,THBS2
GO: Biological Process	GO:0001568	blood vessel development		9.53e-08	0.0005457	9.745e-06	8.994e-05	54	1168	EPHB2,EPHB6,RAMP2,RHOJ,ACTA2,MCAM,E2F7,HLX,FBN2,PKM,AMOTL2,FOXC1,FOXC2,COL4A1,JCAD,COL8A1,TEAD2,SFRP1,FN1,SGCD,WNT7A,WT1,IGFBP7,OSR1,CCN2,DCBLD2,ATP2B4,SERPINB7,ARHGAP24,MYLK,GATA2,MARCKSL1,PTHLH,SULF1,ARHGEF9,SLC12A6,SASH1,CALD1,PLXDC1,CNTRL,LPAR1,GSK3B,EDNRA,TGFB2,THBS2,EGR2,TJP1,CCBE1,VASH2,PSME3,TNFAIP2,GREM1,CDH2,SMAD1
Coexpression Atlas	gudmap_kidney_P3_CapMes_Crym_1000	kidney_P3_CapMes_Crym_top-relative-expression-ranked_1000	Gudmap Mouse MOE430.2	9.703e-08	0.0003804	9.345e-07	8.272e-06	40	749	EYA4,PENK,MEIS2,FABP5,FBN2,MEX3A,HOXD11,RAD54B,MEX3B,CAP2,FOXC2,SEMA3F,TNC,WT1,OSR1,UHRF1,IL17RD,DKK2,CCP110,MYLK,GAS2,LAMP5,FJX1,DCX,MELK,NUAK1,SULF1,BUB1,CTXN1,ZNF704,CDCA8,TFAP2A,EDNRA,NCS1,HMCN1,CDK2AP1,TNFAIP2,HSD17B14,CDH2,EPB41
Coexpression Atlas	gudmap_developingLowerUrinaryTract_adult_bladder_200_k4	DevelopingLowerUrinaryTract_adult_bladder_emap-29457_k-means-cluster#4_top-relative-expression-ranked_200	Gudmap Mouse MOE430.2	9.777e-08	0.0003833	9.393e-07	8.314e-06	9	39	ACTA2,ACTG2,PLN,CNN1,MYH11,MYLK,PTHLH,TAGLN,NT5E
Coexpression Atlas	gudmap_kidney_adult_JuxtaGlom_Ren1_Captopr_1000	kidney_adult_JuxtaGlom_Ren1_Captopr_top-relative-expression-ranked_1000	Gudmap Mouse MOE430.2	9.866e-08	0.0003868	9.456e-07	8.37e-06	41	779	TPM2,VGLL3,PDE4D,ACTA2,MCAM,PICALM,MYL9,FHL1,PLN,SDC1,CNN1,CAP2,SFRP1,COL12A1,RGS5,SOSTDC1,IGFBP7,CYYR1,LIMCH1,PRKG1,SNCG,DKK2,MYH11,HTRA1,ARHGAP24,MYLK,INHBA,GAS2,GATA3,BGN,CCDC3,KCNMB1,TAGLN,ST8SIA4,CACNA1C,KRT7,CALD1,EDNRA,SLC7A8,LY6E,AADAT
Coexpression Atlas	PCBC_ratio_MESO-30_from-ESC_vs_MESO-30_from-OSK-L-l-p53KD_cfr-2X-p05	Mesoderm Day 30-reprogram_NA_vs_Mesoderm Day 30-reprogram_OSK-L-l-p53KD-Confounder_removed-fold2.0_adjp0.05	PCBC_AltAnalyze	1.016e-07	0.0003985	9.695e-07	8.581e-06	19	207	TTYH1,DACT2,SEMA5B,MMP11,PLN,ISLR2,NLRP2,CRMP1,HTRA1,DCX,BGN,SULT1E1,CCDC3,ZNF558,NKAIN1,GPC2,DPYSL3,INA,PBX3
Coexpression Atlas	PCBC_ratio_MESO-30_from-ESC_vs_MESO-30_from-episomal_cfr-2X-p05	Mesoderm Day 30-method_NA_vs_Mesoderm Day 30-method_episomal-Confounder_removed-fold2.0_adjp0.05	PCBC_AltAnalyze	1.016e-07	0.0003985	9.695e-07	8.581e-06	19	207	TTYH1,DACT2,SEMA5B,MMP11,PLN,ISLR2,NLRP2,CRMP1,HTRA1,DCX,BGN,SULT1E1,CCDC3,ZNF558,NKAIN1,GPC2,DPYSL3,INA,PBX3
GO: Biological Process	GO:0016049	cell growth		1.031e-07	0.0005901	1.035e-05	9.556e-05	39	713	CDKN2A,MAP2,NDRG3,PICALM,SEMA5B,ARIH2,FHL1,LTBP4,TRIM46,SEMA3F,ISLR2,COL6A3,SFRP1,FN1,TNC,WT1,CRABP2,POSTN,TAF9B,IGFBP7,CELF1,PRKG1,DCBLD2,PRSS2,SPOCK1,INHBA,GAS1,PARD6G,DCX,SYT1,WASF1,HDGFL2,DDR1,RGS4,GSK3B,EDNRA,TGFB2,SEMA3D,GREM1
Coexpression Atlas	Facebase_RNAseq_e8.5_Floor Plate_1000	FacebaseRNAseq_e8.5_Floor Plate_top-relative-expression-ranked_1000	FaceBase_RNAseq	1.041e-07	0.0004081	9.904e-07	8.767e-06	48	994	TTYH1,MAP2,ACTA2,REEP2,ENOPH1,TUBB3,TUBB4A,KIAA1549L,ANLN,FHL1,MAP4K4,MGAT5B,AGAP3,SFRP1,RGS5,PODXL,POU3F1,CCDC80,SCUBE2,DKK1,DLL3,GIGYF2,SNRPN,MYCL,CCP110,ADAM19,C11orf87,GGA3,SYT11,TAGLN,RHNO1,RAB6A,NOVA1,UACA,DTNA,GAL3ST4,NKIRAS2,ZNF503,KATNBL1,SOX21,INA,TLE4,PAK3,GREM1,TOX2,CDH2,PLEKHO1,EPB41
Coexpression	M45671	HE_LIM_SUN_FETAL_LUNG_C0_LATE_AIRWAY_SMC_CELL	C8: Cell Type Signature	1.043e-07	0.000972	4.378e-06	4.255e-05	13	115	ACTG2,CNN1,CAP2,RBM38,MYH11,CCDC3,KCNMB1,GLIPR1,DTNA,ADAMTS8,ADAMTS5,THBS2,LTBP2
Coexpression	M19068	CERVERA_SDHB_TARGETS_2	C2:CGP: Chemical and Genetic Perturbations	1.043e-07	0.000972	4.378e-06	4.255e-05	13	115	VGLL3,MCAM,FBN2,SOSTDC1,MOXD1,IGFBP7,GAS2,NUAK1,NT5E,TFAP2A,TGFB2,LTBP2,UBASH3B
GO: Biological Process	GO:0035282	segmentation		1.049e-07	0.0006005	1.035e-05	9.557e-05	19	205	FOXC1,FOXC2,SEMA3F,SFRP1,FN1,WT1,CCDC80,SCUBE2,NKD1,DKK1,DLL3,OSR1,SULF1,MAFB,EDNRA,TBX18,EGR2,CDH2,EPHA3
Coexpression Atlas	gudmap_kidney_adult_RenalCapsule_k2_1000	kidney_adult_RenalCapsule_k-means-cluster#2_top-relative-expression-ranked_1000	Gudmap Mouse MOE430.2	1.069e-07	0.0004192	1.015e-06	8.985e-06	26	369	VGLL3,CNTNAP3,FZD1,FST,LTBP4,JCAD,COL6A3,COL8A1,SFRP1,COL12A1,MRAS,SGCD,ARHGDIB,INHBA,DOCK11,GBP1,OLFML1,SULF1,TAGLN,KRT7,DPYSL3,LCP1,LPAR1,SERTAD4,LTBP2,CDH12
Coexpression Atlas	gudmap_developingLowerUrinaryTract_e13.5_bladder neck-urethr mesench_200	DevelopingLowerUrinaryTract_e13.5_bladder neck-urethr mesench_emap-3087_top-relative-expression-ranked_200	Gudmap Mouse MOE430.2	1.076e-07	0.0004219	1.019e-06	9.02e-06	17	167	EYA4,ACTG2,CSRNP3,PCDH10,UBE2E3,CNTN1,COL8A1,DKK1,SPOCK1,C11orf87,NEFL,ST6GAL2,STMN3,GRIN3A,RGS4,EGR2,EPHA3
Coexpression Atlas	DevelopingLowerUrinaryTract_e14.5_ bladder_emap-6668_k4_1000	DevelopingLowerUrinaryTract_e14.5_ bladder_emap-6668_k-means-cluster#4_top-relative-expression-ranked_1000	Gudmap Mouse MOE430.2	1.081e-07	0.0004238	1.021e-06	9.038e-06	13	95	VGLL3,ACTA2,ACTG2,UPK3A,DKK3,MYH11,MYLK,GBP1,KCNMB1,TAGLN,GLIPR1,NIPAL4,THBS2
Coexpression	M7396	SWEET_LUNG_CANCER_KRAS_DN	C2:CGP: Chemical and Genetic Perturbations	1.093e-07	0.001019	4.57e-06	4.441e-05	25	421	RAMP2,RHOJ,ACTA2,MYL9,FHL1,LTBP4,CNTN1,COL13A1,ID3,AKAP12,POSTN,LIMCH1,MYH11,DENND2B,TUBA1A,NFIB,STMN3,BUB1,TAGLN,ST8SIA4,ZEB1,SASH1,TJP1,SLC7A5,EPB41
Coexpression	M12144	BROWNE_HCMV_INFECTION_48HR_DN	C2:CGP: Chemical and Genetic Perturbations	1.104e-07	0.001029	4.596e-06	4.466e-05	27	482	MAP2,MYL9,SDC1,JCAD,FN1,SGCD,CRABP2,CRMP1,POSTN,MOXD1,SERPINB7,MYH11,INHBA,GDF10,DENND2B,OLFML2A,SULF1,NFIB,TAGLN,CACNA1C,DTNA,PSCA,OPRK1,THBS2,TJP1,LTBP2,LY6E
Coexpression Atlas	gudmap_developingGonad_P2_epididymis_500	DevelopingGonad_P2_epididymis_emap-30199_top-relative-expression-ranked_500	Gudmap Mouse MOE430.2	1.125e-07	0.0004409	1.06e-06	9.381e-06	27	395	PENK,ACTA2,MEIS2,LTBP4,CNN1,SFRP1,CHODL,SFSWAP,MOXD1,PRKG1,MYH11,HTRA1,INHBA,AIF1L,GDF10,SULT1E1,NFIB,NRK,TAGLN,DPYSL3,GSK3B,EDNRA,THBS2,KATNBL1,LTBP2,SENP7,EPHA3
Coexpression Atlas	gudmap_kidney_P3_CapMes_Crym_500	kidney_P3_CapMes_Crym_top-relative-expression-ranked_500	Gudmap Mouse MOE430.2	1.128e-07	0.0004422	1.06e-06	9.386e-06	26	370	EYA4,PENK,FBN2,MEX3A,HOXD11,FOXC2,TNC,WT1,OSR1,UHRF1,IL17RD,DKK2,CCP110,MYLK,GAS2,LAMP5,FJX1,DCX,NUAK1,SULF1,EDNRA,NCS1,HMCN1,TNFAIP2,HSD17B14,CDH2
GO: Biological Process	GO:0034330	cell junction organization		1.154e-07	0.0006607	1.12e-05	0.0001034	47	955	EPHB2,CTTNBP2,RAMP2,ASIC2,PICALM,FZD1,SLITRK6,MAP4K4,PLS3,CAP2,COL4A1,SEMA3F,SFRP1,FN1,CHODL,TNC,NLGN4Y,WNT7A,TUBB,SLITRK3,LRRN3,DKK1,LIMCH1,SNCG,MYADM,PCDHB5,PARD6G,ZC4H2,NEFL,TUBA1A,NECTIN1,ARHGEF9,WASF1,SHANK1,PCDHB10,GSK3B,TGFB2,THBS2,INA,TJP1,PAK3,GREM1,CDH2,CDH12,PHLDB2,TPBG,EPHA3
Coexpression	M39062	MANNO_MIDBRAIN_NEUROTYPES_HNPROG	C8: Cell Type Signature	1.159e-07	0.001081	4.803e-06	4.667e-05	18	229	EPHB2,RFTN2,TUBB3,TEAD2,WNT7A,POU3F1,DLL3,MIAT,DCX,ANOS1,GPC2,PCBP4,STMN1,ADAMTS5,CDCA8,RGS4,MSANTD3-TMEFF1,EPB41
Coexpression	M14134	TURASHVILI_BREAST_DUCTAL_CARCINOMA_VS_DUCTAL_NORMAL_DN	C2:CGP: Chemical and Genetic Perturbations	1.207e-07	0.001125	4.98e-06	4.839e-05	17	205	MAP2,CNTNAP3,ACTG2,TRIM29,ALDH1A3,CNN1,SFRP1,TNC,RND3,MYH11,MYLK,TUBB2B,NFIB,TAGLN,KRT7,ADAMTS5,PAK3
Coexpression	M39241	LAKE_ADULT_KIDNEY_C22_ENDOTHELIAL_CELLS_GLOMERULAR_CAPILLARIES	C8: Cell Type Signature	1.215e-07	0.001133	4.99e-06	4.849e-05	14	137	MEIS2,COL4A1,AKAP12,LIMCH1,PRKG1,FBXL7,RBMS3,EXOC6B,CACNA1C,ZEB1,SASH1,CALD1,UACA,TJP1
Coexpression Atlas	GSM777063_100	Stromal Cells, LEC.SLN, gp38+ CD31+, Lymph Node, avg-4	Immgen.org, GSE15907	1.227e-07	0.0004808	1.15e-06	1.018e-05	13	96	RAMP2,RHOJ,ARHGAP29,LTBP4,FN1,TNC,CRIP2,POSTN,IGFBP7,BGN,NFIB,SEMA3D,TJP1
Coexpression Atlas	Facebase_RNAseq_e10.5_Neural Epithelium Flanking Eminence_1000_K4	FacebaseRNAseq_e10.5_Neural Epithelium Flanking Eminence_top-relative-expression-ranked_1000_k-means-cluster#4	FaceBase_RNAseq	1.23e-07	0.0004822	1.151e-06	1.019e-05	20	231	EPHB2,TENM2,KIAA1549L,SEMA5B,PGAP1,FHL1,POGK,WNT7A,APLP1,WDR47,TUBB2B,NOVA1,DPYSL3,MAMLD1,RFWD3,SOX21,PAK3,CDH2,TPBG,EPHA3
Coexpression	M16859	SENESE_HDAC3_TARGETS_DN	C2:CGP: Chemical and Genetic Perturbations	1.247e-07	0.001163	5.1e-06	4.956e-05	29	548	TPM1,VGLL3,MCAM,CCDC144NL-AS1,TENM2,MYL9,ARIH2,MARCHF4,MGAT5B,COL8A1,ARHGDIB,TAF9B,RAB15,CCN2,LIMCH1,PARD6G,AIF1L,CYRIA,RBMS3,STMN3,TAGLN,DTNA,MRPL4,TGFB2,KATNBL1,CCBE1,SERTAD4,SLC7A5,DHRS2
Coexpression Atlas	Facebase_RNAseq_e10.5_Olfactory Pit_1000_K5	FacebaseRNAseq_e10.5_Olfactory Pit_top-relative-expression-ranked_1000_k-means-cluster#5	FaceBase_RNAseq	1.248e-07	0.0004891	1.164e-06	1.031e-05	22	276	ADCY2,SLITRK6,COL6A3,CHODL,TNC,SP110,IGFBP7,OSR1,ATP2B4,DKK2,INHBA,GATA3,P4HA3,COL24A1,OLFML1,NFIB,NRK,CCDC3,EXOC6B,CACNA1C,KRT7,THBS2
GO: Biological Process	GO:0042476	odontogenesis		1.276e-07	0.0007306	1.218e-05	0.0001124	17	167	FST,SDC1,FOXC1,ID3,SOSTDC1,OSR1,HTRA1,INHBA,GAS1,NECTIN1,DLX2,ADAMTS5,TFAP2A,EDNRA,TGFB2,SLC7A5,CDH2
Coexpression Atlas	Facebase_RNAseq_e9.5_Maxillary Arch_2500_K5	FacebaseRNAseq_e9.5_Maxillary Arch_top-relative-expression-ranked_2500_k-means-cluster#5	FaceBase_RNAseq	1.323e-07	0.0005187	1.232e-06	1.091e-05	32	530	PDE4D,ACTG2,ADCY2,MARCHF4,KIF17,FOXC1,COL6A3,MRAS,CHODL,TNC,SGCD,IGFBP7,DLL3,DKK3,INHBA,GAS2,GATA3,P4HA3,C11orf87,LAMP5,SLFN5,PDE10A,OLFML2A,FBXL7,CCDC3,EXOC6B,GPC2,NT5E,THBS2,LMNA,LTBP2,HSD17B14
Coexpression Atlas	Facebase_RNAseq_e10.5_Medial Nasal Eminence_2500_K1	FacebaseRNAseq_e10.5_Medial Nasal Eminence_top-relative-expression-ranked_2500_k-means-cluster#1	FaceBase_RNAseq	1.363e-07	0.0005342	1.266e-06	1.12e-05	35	614	EPHB2,TTYH1,MAP2,MEIS2,KIAA1549L,CSRNP3,SEMA5B,CPT1C,PCDH10,LTBP4,MGAT5B,IGLON5,COL8A1,POGK,WNT7A,DPYSL4,APLP1,ZNF43,NCAM2,TUBB2B,BRINP1,DCX,TUBA1A,SYT11,ASTN2,SGCE,WNK2,SHANK1,DTNA,MAMLD1,TAMALIN,GPR137C,PAK3,SENP7,EPHA3
Coexpression Atlas	JC_iEC_2500_K1	JC_iEC_top-relative-expression-ranked_2500_k-means-cluster#1	PCBC	1.411e-07	0.0005533	1.308e-06	1.158e-05	37	672	PDE4D,RHOJ,ASIC2,MCAM,FZD1,TUBB3,FBN2,HOXD11,ARHGAP31,ARHGAP29,MARCHF4,PCDH10,SOSTDC1,SCUBE2,DKK1,DLL3,PRKG1,SNCG,H19,LAMP5,SULT1E1,GRIN3A,ST8SIA4,ZEB1,PCDHGB6,NT5E,DUSP4,MAMLD1,ADAMTS5,RGS4,TGFB2,THBS2,TLE4,SERTAD4,TNFAIP2,AADAT,TOX2
Coexpression Atlas	Facebase_RNAseq_ratio_e9.5_MandibularArch_vs_MaxillaryArch_1000_K1	FacebaseRNAseq_ratio_e9.5_MandibularArch_vs_MaxillaryArch_top-relative-expression-ranked_1000_k-means-cluster#1	FaceBase_RNAseq	1.416e-07	0.0005552	1.309e-06	1.159e-05	20	233	TTYH1,MEIS2,KIAA1549L,SEMA5B,LTBP4,IGLON5,COL8A1,DPYSL4,APLP1,ZNF43,NCAM2,DCX,ASTN2,WNK2,SHANK1,DTNA,MAMLD1,GPR137C,SENP7,EPHA3
Coexpression	M1626	BURTON_ADIPOGENESIS_PEAK_AT_0HR	C2:CGP: Chemical and Genetic Perturbations	1.441e-07	0.001343	5.865e-06	5.7e-05	10	64	TPM1,ACTA2,NREP,MYL9,COL8A1,ISG15,RASL11B,GAS1,GAS2,THBS2
Coexpression Atlas	Facebase_RNAseq_ratio_e10.5_MandibularArch_vs_MaxillaryArch_1000	FacebaseRNAseq_ratio_e10.5_MandibularArch_vs_MaxillaryArch_top-relative-expression-ranked_1000	FaceBase_RNAseq	1.459e-07	0.0005719	1.346e-06	1.191e-05	47	974	IGSF8,PENK,TENM2,ADCY2,ENOPH1,KIAA1549L,MYL9,SLITRK6,MMP11,LTBP4,CAP2,COL6A3,COL8A1,CHODL,RGS5,TNC,SOSTDC1,DPYSL4,CCDC80,POSTN,IGFBP7,ZNF43,OSR1,DKK2,H19,HTRA1,INHBA,P4HA3,NCAM2,FJX1,PDE10A,DCX,COL24A1,OLFML1,NFIB,NRK,CCDC3,KCNMB4,SHANK1,CACNA1C,DDR1,TSC22D3,CAMK2G,SEMA3D,THBS2,SENP7,EPHA3
Coexpression Atlas	Facebase_RNAseq_e8.5_Non-Floor Plate Neural Epithelium_2500_K2	FacebaseRNAseq_e8.5_Non-Floor Plate Neural Epithelium_top-relative-expression-ranked_2500_k-means-cluster#2	FaceBase_RNAseq	1.473e-07	0.0005773	1.355e-06	1.2e-05	23	302	PENK,REEP2,TUBB4A,PKM,PLS3,SFRP1,RGS5,PODXL,CCDC80,POSTN,SCUBE2,DKK1,MANBAL,SNRPN,MYADM,HTRA1,ARHGAP24,OLFML2A,NECTIN1,ZNF503,PIANP,INA,GREM1
Coexpression Atlas	gudmap_developingGonad_e14.5_ epididymis_1000_k4	DevelopingGonad_e14.5_ epididymis_emap-29141_k-means-cluster#4_top-relative-expression-ranked_1000	Gudmap Mouse MOE430.2	1.491e-07	0.0005846	1.369e-06	1.212e-05	21	256	MEIS2,ARHGAP31,SFRP1,STARD4,CHODL,SFSWAP,MOXD1,ZNF43,PRKG1,INHBA,GATA2,GDF10,RBMS3,NFIB,DNMT3A,EDNRA,TGFB2,SEMA3D,KATNBL1,UBASH3B,EPHA3
Coexpression Atlas	gudmap_developingGonad_e18.5_epididymis_1000_k5	DevelopingGonad_e18.5_epididymis_emap-13166_k-means-cluster#5_top-relative-expression-ranked_1000	Gudmap Mouse MOE430.2	1.519e-07	0.0005953	1.391e-06	1.231e-05	20	234	PENK,ACTA2,CNN1,SFRP1,COL12A1,STARD4,CHODL,MOXD1,PRKG1,HTRA1,INHBA,GATA2,GDF10,SULT1E1,EDNRA,THBS2,LMNA,LTBP2,EPHA3,RASD2
Coexpression Atlas	DevelopingLowerUrinaryTract_e14.5_ urethra_emap-30902_k4_500	DevelopingLowerUrinaryTract_e14.5_ urethra_emap-30902_k-means-cluster#4_top-relative-expression-ranked_500	Gudmap Mouse MOE430.2	1.548e-07	0.0006067	1.414e-06	1.252e-05	11	67	CTTNBP2,CSRNP3,SLITRK6,PCDH10,COL8A1,TNC,GIGYF2,DKK2,ST6GAL2,TFAP2A,EPHA3
Coexpression Atlas	gudmap_developingLowerUrinaryTract_e14.5_ Genital tubercle F_1000_k3	DevelopingLowerUrinaryTract_e14.5_ Genital tubercle F_emap-6706_k-means-cluster#3_top-relative-expression-ranked_1000	Gudmap Mouse MOE430.2	1.571e-07	0.000616	1.432e-06	1.268e-05	13	98	TENM2,SLITRK6,PCDH10,WNT7A,SOSTDC1,CRABP2,DKK1,LIMCH1,DKK2,NTM,DLX2,TFAP2A,FRMD6
Coexpression Atlas	Facebase_RNAseq_ratio_e9.5_MaxillaryArch_vs_Mandibular_500_K5	FacebaseRNAseq_ratio_e9.5_MaxillaryArch_vs_Mandibular_top-relative-expression-ranked_500_k-means-cluster#5	FaceBase_RNAseq	1.654e-07	0.0006484	1.501e-06	1.328e-05	17	172	PDE4D,ADCY2,SLITRK6,PCYT1B,COL6A3,CHODL,TNC,IGFBP7,NSG1,OSR1,DKK3,DKK2,INHBA,P4HA3,COL24A1,NRK,CCDC3
Coexpression Atlas	gudmap_kidney_adult_RenCorpuscGlomer_200	kidney_adult_RenCorpuscGlomer_top-relative-expression-ranked_200	Gudmap Mouse MOE430.2	1.654e-07	0.0006484	1.501e-06	1.328e-05	17	172	ABCA9,EHD3,RGS5,PODXL,TAF9B,IGFBP7,CYYR1,PRKG1,DKK2,HTRA1,ARHGAP24,GATA3,SLFN5,MAFB,UACA,NT5E,ADAMTS5
GO: Biological Process	GO:0007420	brain development		1.675e-07	0.0009592	1.556e-05	0.0001437	55	1221	EPHB2,CTTNBP2,ADCY1,MEIS2,SBK1,FZD1,PGAP1,ALDH1A3,FST,MRTFA,CNTN1,FOXC1,COL4A1,SFRP1,FN1,NLGN4Y,WNT7A,POU3F1,APLP1,STIL,CRABP2,WDR47,DKK1,CELF1,PRKG1,CTNS,ATP2B4,INHBA,GAS1,GATA2,TUBB2B,MEIS3,GDF10,DCX,NEFL,TUBA1A,NFIB,SYT1,MAFB,DLX2,NNAT,ZEB1,TSC22D3,TFAP2A,LPAR1,RGS4,GSK3B,ZNF503,SEMA3D,INA,EGR2,PBX3,CDH2,SMAD1,RBFOX2
GO: Biological Process	GO:0001944	vasculature development		1.697e-07	0.0009715	1.556e-05	0.0001437	56	1254	EPHB2,EPHB6,RAMP2,RHOJ,ACTA2,MCAM,E2F7,HLX,FBN2,PKM,AMOTL2,FOXC1,FOXC2,COL4A1,JCAD,COL8A1,TEAD2,SFRP1,FN1,SGCD,WNT7A,WT1,IGFBP7,OSR1,CCN2,DCBLD2,ATP2B4,SERPINB7,ARHGAP24,MYLK,GATA2,MARCKSL1,PTHLH,SULF1,ARHGEF9,MAFB,TMEM231,SLC12A6,SASH1,CALD1,PLXDC1,CNTRL,LPAR1,GSK3B,EDNRA,TGFB2,THBS2,EGR2,TJP1,CCBE1,VASH2,PSME3,TNFAIP2,GREM1,CDH2,SMAD1
GO: Biological Process	GO:0048705	skeletal system morphogenesis		1.712e-07	0.0009805	1.556e-05	0.0001437	29	450	MEIS2,FBN2,HOXD11,FST,PLS3,FOXC1,WDR48,FOXC2,COL9A1,SFRP1,COL13A1,FN1,WNT7A,SCUBE2,OSR1,CCN2,GAS1,GATA3,PTHLH,SULF1,DLX2,CACNA1C,ZEB1,TFAP2A,EDNRA,TGFB2,SEMA3D,GREM1,CDH2
Coexpression Atlas	Facebase_RNAseq_ratio_e9.5_MaxillaryArch_vs_Mandibular_100	FacebaseRNAseq_ratio_e9.5_MaxillaryArch_vs_Mandibular_top-relative-expression-ranked_100	FaceBase_RNAseq	1.774e-07	0.0006956	1.606e-06	1.422e-05	13	99	IGSF8,PDE4D,PENK,TENM2,SEMA5B,ALDH1A3,SLITRK6,PCDH10,COL6A3,NSG1,OSR1,DKK3,NTM
GO: Biological Process	GO:0050808	synapse organization		1.789e-07	0.001024	1.6e-05	0.0001477	36	642	EPHB2,CTTNBP2,ASIC2,PICALM,FZD1,SLITRK6,PLS3,CAP2,COL4A1,SEMA3F,CHODL,TNC,NLGN4Y,WNT7A,TUBB,SLITRK3,LRRN3,DKK1,SNCG,PCDHB5,ZC4H2,NEFL,TUBA1A,NECTIN1,ARHGEF9,WASF1,SHANK1,PCDHB10,GSK3B,THBS2,INA,TJP1,PAK3,CDH2,TPBG,EPHA3
Coexpression Atlas	gudmap_developingLowerUrinaryTract_P1_bladder_100_B	DevelopingLowerUrinaryTract_P1_bladder_B_emap-30374_top-relative-expression-ranked_100	Gudmap Mouse MOE430.2	1.803e-07	0.0007069	1.629e-06	1.442e-05	12	83	ACTA2,ACTG2,MYL9,UPK3A,CNN1,RGS5,SMTN,MYH11,MYLK,TAGLN,NIPAL4,NT5E
Coexpression	M17183	BENPORATH_OCT4_TARGETS	C2:CGP: Chemical and Genetic Perturbations	1.968e-07	0.001834	7.975e-06	7.75e-05	20	290	CNTNAP3,MCC,TRIM22,MEIS2,RAD54B,SFRP1,COL12A1,TNC,DKK1,OSR1,CCN2,SNRPN,GAS1,NEFL,SULF1,KCNMB4,DPYSL3,DTNA,THBS2,KATNBL1
Coexpression Atlas	Facebase_RNAseq_ratio_e9.5_MaxillaryArch_vs_Mandibular_500_K2	FacebaseRNAseq_ratio_e9.5_MaxillaryArch_vs_Mandibular_top-relative-expression-ranked_500_k-means-cluster#2	FaceBase_RNAseq	2.001e-07	0.0007843	1.799e-06	1.592e-05	13	100	KIAA1549L,SEMA5B,PCDH10,LTBP4,COL8A1,APLP1,NCAM2,NTM,WNK2,THBS2,TOX2,SENP7,EPHA3
Coexpression Atlas	gudmap_dev gonad_e13.5_F_VascAssocMesenchStromOvary_Sma_k2_500	dev gonad_e13.5_F_VascAssocMesenchStromOvary_Sma_k-means-cluster#2_top-relative-expression-ranked_500	Gudmap Mouse ST 1.0	2.001e-07	0.0007843	1.799e-06	1.592e-05	13	100	MAP2,FBN2,CRABP2,POSTN,NKD1,MYH11,OLFML1,NRK,ZNF558,MAFB,KRT7,LPAR1,EGR2
Coexpression	M43617	GAUTAM_EYE_CORNEA_FIBROBLASTS	C8: Cell Type Signature	2.034e-07	0.001896	8.206e-06	7.975e-05	15	165	TPM2,RAMP2,MYL9,COL6A3,COL8A1,COL12A1,CCDC80,AKAP12,MYADM,MYLK,RBMS3,TSC22D3,NT5E,UBXN1,LTBP2
GO: Biological Process	GO:0090092	regulation of transmembrane receptor protein serine/threonine kinase signaling pathway		2.048e-07	0.001173	1.804e-05	0.0001665	26	377	DACT2,FAM89B,NREP,FZD1,FBN2,FST,FKBP1A,LTBP4,SFRP1,SOSTDC1,SH2B1,SCUBE2,DKK1,OSR1,RASL11B,IL17RD,DKK3,HTRA1,INHBA,GDF10,RBMS3,SULF1,ZEB1,TSC22D3,TGFB2,GREM1
Coexpression Atlas	gudmap_dev lower uro neuro_e14.5_PelvicGanglion_Sox10_k1_500	dev lower uro neuro_e14.5_PelvicGanglion_Sox10_k-means-cluster#1_top-relative-expression-ranked_500	Gudmap Mouse ST 1.0	2.064e-07	0.000809	1.851e-06	1.639e-05	12	84	CSMD3,TUBB3,CRMP1,POSTN,GATA3,NEFL,TSPAN17,SYT11,SYT1,ASTN2,DPYSL3,INA
GO: Biological Process	GO:0061061	muscle structure development		2.137e-07	0.001224	1.854e-05	0.0001711	49	1038	TPM1,IGSF8,RAMP2,HLX,FZD1,MYL9,FHL1,FKBP1A,SDC1,MRTFA,RBM38,FOXC1,FOXC2,COL6A3,BIN1,CHODL,SGCD,WT1,ID3,SOSTDC1,AKAP12,SMTN,POSTN,SCUBE2,NKD1,DKK1,MYH11,MYLK,SGCE,TAGLN,HDGFL2,GPC1,ZEB1,TSC22D3,ADAMTS5,RGS4,GSK3B,EDNRA,TGFB2,TBX18,LMNA,EGR2,TLL2,GREM1,LY6E,CDH2,PLEKHO1,SMAD1,RBFOX2
GO: Cellular Component	GO:0005938	cell cortex		2.151e-07	0.0001377	2.754e-05	0.0001938	26	381	CTTNBP2,TRPC4,MYL9,ANLN,AMOTL2,PDZD4,SEPTIN5,CRIP2,AKAP12,OSR1,CCN2,MYADM,PARD6G,MELK,DENND2B,SEPTIN6,SEPTIN2,ARHGEF9,EXOC6B,ASTN2,CALD1,HMCN1,TNFAIP2,CDH2,EPB41,PHLDB2
Coexpression	M13186	MCBRYAN_PUBERTAL_BREAST_3_4WK_UP	C2:CGP: Chemical and Genetic Perturbations	2.239e-07	0.002087	8.996e-06	8.742e-05	17	214	FZD1,PROM2,SDC1,CNN1,COL8A1,TEAD2,COL9A1,SFRP1,FN1,TNC,MYH11,GAS1,GATA3,MAFB,KRT7,EDNRA,EGR2
Coexpression Atlas	gudmap_kidney_adult_RenalCapsule_k1_500	kidney_adult_RenalCapsule_k-means-cluster#1_top-relative-expression-ranked_500	Gudmap Mouse MOE430.2	2.29e-07	0.0008978	2.05e-06	1.814e-05	20	240	VGLL3,PENK,FZD1,FST,LTBP4,COL8A1,SFRP1,COL12A1,MRAS,SGCD,ARHGDIB,OSR1,GBP1,OLFML1,SULF1,KRT7,LCP1,LPAR1,HMCN1,CDH12
Coexpression Atlas	gudmap_developingLowerUrinaryTract_e14.5_ urethra_500_k2	DevelopingLowerUrinaryTract_e14.5_ urethra_emap-30892_k-means-cluster#2_top-relative-expression-ranked_500	Gudmap Mouse MOE430.2	2.333e-07	0.0009143	2.083e-06	1.844e-05	15	137	CTTNBP2,SLITRK6,PCDH10,TNC,DPYSL4,SPOCK1,NEFL,SULF1,ARHGEF9,GRIN3A,ST8SIA4,DPYSL3,TFAP2A,EPHA3,ARMH4
Coexpression Atlas	gudmap_developingGonad_e16.5_epididymis_1000_k5	DevelopingGonad_e16.5_epididymis_emap-29702_k-means-cluster#5_top-relative-expression-ranked_1000	Gudmap Mouse MOE430.2	2.361e-07	0.0009253	2.103e-06	1.861e-05	18	197	PENK,ACTA2,ALDH1A3,PCDH10,SFRP1,STARD4,CHODL,SFSWAP,MOXD1,PRKG1,INHBA,GATA2,GDF10,NFIB,EDNRA,SEMA3D,KATNBL1,EPHA3
Coexpression	M5389	RODWELL_AGING_KIDNEY_UP	C2:CGP: Chemical and Genetic Perturbations	2.386e-07	0.002224	9.545e-06	9.275e-05	27	501	TPM1,MCAM,TRIM22,MMP11,MRAS,FN1,TNC,ARHGDIB,MOXD1,GLIPR2,DKK3,SAMD9,INHBA,DOCK11,SLFN5,CYRIA,NUAK1,TUBA1A,RBMS3,TAGLN,ST8SIA4,NT5E,UBXN1,TNFAIP2,LY6E,PLEKHO1,TPBG
Coexpression	MM1118	SASAI_RESISTANCE_TO_NEOPLASTIC_TRANSFROMATION	M2:CGP: Chemical and Genetic Perturbations	2.457e-07	0.00229	9.788e-06	9.512e-05	9	52	AMOTL2,MMP11,ID3,CCN2,GBP1,BGN,TAGLN,DDR1,LTBP2
Coexpression Atlas	PCBC_EB_blastocyst_1000	Progenitor-Cell-Biology-Consortium_EmbryoidBody_fromBlastocyst-derived-humanEmbryonicStemCells_top-relative-expression-ranked_1000	PCBC	2.482e-07	0.0009729	2.206e-06	1.953e-05	47	992	PENK,ACTA2,DACT2,ACTG2,SBK1,SEMA5B,HOXD11,UPK3A,SLITRK6,PLN,IGLON5,PDZD4,COL6A3,COL9A1,COL9A2,WNT7A,SOSTDC1,NKD1,OSR1,RASL11B,MIAT,DKK2,H19,GAS1,BRINP1,GDF10,DCX,SULT1E1,NEFL,COL24A1,OLFML1,SULF1,NRK,DLX2,NKAIN1,NNAT,NIPAL4,PCDHGB6,TFAP2A,RGS4,TGFB2,PLEKHG4B,SEMA3D,PWWP3B,GREM1,LY6H,EPHA3
Coexpression	M45686	HE_LIM_SUN_FETAL_LUNG_C0_VASCULAR_SMC_1_CELL	C8: Cell Type Signature	2.543e-07	0.002371	1.009e-05	9.803e-05	13	124	TTYH1,MAP2,MCAM,SEMA5B,ARHGAP29,FST,HSPA2,CAP2,OLFML2B,ARHGDIB,MYH11,PLXDC1,LTBP2
Coexpression	M2076	WHITFIELD_CELL_CYCLE_G2	C2:CGP: Chemical and Genetic Perturbations	2.573e-07	0.002398	1.016e-05	9.875e-05	15	168	ANLN,HSPA2,SGCD,TUBB,STIL,NLRP2,GAS1,MELK,TUBA1A,RHNO1,UACA,CDCA8,TFAP2A,KATNBL1,ARHGAP19
Coexpression	M863	LEI_MYB_TARGETS	C2:CGP: Chemical and Genetic Perturbations	2.613e-07	0.002435	1.028e-05	9.986e-05	21	323	TPM1,ACTA2,MYL9,SEMA3F,COL6A3,SFRP1,FN1,CRABP2,CRIP2,IGFBP7,ISG15,SNRPN,GATA3,PTHLH,DDR1,KRT7,TSC22D3,TFAP2A,SLC7A5,DHRS2,LY6E
Coexpression	M2737	PRC2_EZH2_UP.V1_DN	C6: Oncogenic Signature	2.654e-07	0.002474	1.04e-05	0.000101	16	192	HMMR,HOXD11,PLN,PCYT1B,LRP12,OLFML2B,APLP1,IFIT1,GAS1,SYT11,SULF1,NFIB,BUB1,DDHD2,ADAMTS5,THBS2
Coexpression Atlas	gudmap_kidney single cell_e11.5_MetanephMesench_Scamp_k3_500	kidney single cell_e11.5_MetanephMesench_StemCellamp_k-means-cluster#3_top-relative-expression-ranked_500	Gudmap Mouse MOE430.2	2.678e-07	0.00105	2.375e-06	2.102e-05	14	120	MEIS2,TUBB4A,FOXC1,TEAD2,COL9A1,TUBB,ID3,CRABP2,POSTN,H19,MEIS3,KCNMB4,TAF1C,CDCA8
Coexpression Atlas	gudmap_developingLowerUrinaryTract_e13.5_bladder mesenchyme_100	DevelopingLowerUrinaryTract_e13.5_bladder mesenchyme_emap-3087_top-relative-expression-ranked_100	Gudmap Mouse MOE430.2	2.688e-07	0.001054	2.378e-06	2.105e-05	12	86	MCC,ACTG2,SLITRK6,RND3,PDE5A,DKK3,MYH11,GBP1,C11orf87,SULF1,TBX18,EGR2
Coexpression Atlas	DevelopingLowerUrinaryTract_e14.5_ urogenital sinus_emap-6689_200	DevelopingLowerUrinaryTract_e14.5_ urogenital sinus_emap-6689_top-relative-expression-ranked_200	Gudmap Mouse MOE430.2	2.713e-07	0.001064	2.395e-06	2.12e-05	17	178	EYA4,CSRNP3,CNTN1,COL8A1,SPOCK1,C11orf87,NCAM2,DCX,NEFL,STMN3,NRK,GRIN3A,ST8SIA4,RGS4,INA,RBFOX2,EPHA3
Coexpression	M41675	TRAVAGLINI_LUNG_ADVENTITIAL_FIBROBLAST_CELL	C8: Cell Type Signature	2.732e-07	0.002547	1.066e-05	0.0001036	20	296	ABCA9,ALDH1A3,LTBP4,COL6A3,SFRP1,CCDC80,CRABP2,AKAP12,MOXD1,OSR1,H19,GAS1,PTHLH,NTM,NOVA1,DPYSL3,NT5E,THBS2,LMNA,TNFAIP2
Coexpression Atlas	gudmap_dev gonad_e12.5_F_VasAssocMesStromOvary_Sma_200	dev gonad_e12.5_F_VasAssocMesStromOvary_Sma_top-relative-expression-ranked_200	Gudmap Mouse ST 1.0	2.738e-07	0.001073	2.412e-06	2.135e-05	16	158	MAP2,MYL9,FST,COL12A1,RGS5,PODXL,WT1,CRABP2,POSTN,PRKG1,SULF1,NRK,KRT7,EDNRA,HMCN1,EGR2
Coexpression Atlas	PCBC_ctl_CardiacMyocyte_500	Progenitor-Cell-Biology-Consortium_reference_CardiacMyocyte_top-relative-expression-ranked_500	PCBC	2.789e-07	0.001093	2.451e-06	2.17e-05	30	493	ACTA2,ABCA9,EVA1A,ALDH1A3,FST,FOXC2,COL6A3,COL8A1,FN1,CCDC80,IFIT1,POSTN,MOXD1,OSR1,INHBA,P4HA3,NCAM2,SLFN5,BGN,OLFML1,SULF1,NT5E,RGS4,TBX18,THBS2,EGR2,CCBE1,LTBP2,GREM1,TOX2
Coexpression Atlas	facebase_RNAseq_e10.5_Emin_MedNas_2500_K1	facebase_RNAseq_e10.5_Emin_MedNas_2500_K1	Gudmap RNAseq	2.813e-07	0.001103	2.467e-06	2.184e-05	49	1060	EPHB2,EYA4,E2F7,HMMR,KATNAL1,REEP2,TUBB4A,KIAA1549L,SEMA5B,PGAP1,RAD54B,FHL1,IGLON5,SFRP1,PODXL,WNT7A,DPYSL4,STIL,CRMP1,WDR47,RND3,DKK1,CCP110,TUBB2B,PDE10A,DCX,NEFL,ST6GAL2,TUBA1A,SYT11,BUB1,ZNF558,NKAIN1,WASF1,WNK2,NOVA2,DPYSL3,ZEB1,DTNA,CNTRL,MAMLD1,TLE4,NAT10,ENTPD3,PAK3,R3HDM1,PSPC1,CDH2,EPB41
Coexpression Atlas	Facebase_RNAseq_e8.5_Paraxial Mesoderm_500_K2	FacebaseRNAseq_e8.5_Paraxial Mesoderm_top-relative-expression-ranked_500_k-means-cluster#2	FaceBase_RNAseq	2.843e-07	0.001114	2.488e-06	2.202e-05	13	103	KIAA1549L,SEMA5B,LTBP4,COL8A1,DPYSL4,ZNF43,NCAM2,DCX,SHANK1,DTNA,MAMLD1,SENP7,EPHA3
Coexpression Atlas	gudmap_developingGonad_P2_epididymis_500_k1	DevelopingGonad_P2_epididymis_emap-30199_k-means-cluster#1_top-relative-expression-ranked_500	Gudmap Mouse MOE430.2	2.857e-07	0.00112	2.495e-06	2.208e-05	11	71	ACTA2,LTBP4,CNN1,MYH11,HTRA1,INHBA,NFIB,NRK,TAGLN,DPYSL3,THBS2
GO: Biological Process	GO:0050770	regulation of axonogenesis		2.955e-07	0.001692	2.525e-05	0.0002331	19	219	EPHB2,MAP2,PICALM,SEMA5B,TRIM46,SEMA3F,ISLR2,FN1,CHODL,TNC,WNT7A,CRABP2,PARD6G,DCX,NEFL,GSK3B,SEMA3D,PAK3,CDH2
Coexpression Atlas	gudmap_kidney_P0_JuxtaGlom_Ren1_k3_200	kidney_P0_JuxtaGlom_Ren1_k-means-cluster#3_top-relative-expression-ranked_200	Gudmap Mouse MOE430.2	2.977e-07	0.001167	2.593e-06	2.295e-05	9	44	MCAM,COL8A1,COL12A1,CCDC80,IGFBP7,PRKG1,DKK2,GATA3,BGN
Coexpression Atlas	Facebase_RNAseq_e9.5_Olfactory Placode_1000_K5	FacebaseRNAseq_e9.5_Olfactory Placode_top-relative-expression-ranked_1000_k-means-cluster#5	FaceBase_RNAseq	2.989e-07	0.001172	2.598e-06	2.3e-05	20	244	ADCY2,SLITRK6,COL6A3,CHODL,TNC,IGFBP7,DLL3,OSR1,DKK2,INHBA,P4HA3,LAMP5,COL24A1,OLFML1,NRK,CCDC3,CACNA1C,KRT7,TFAP2A,THBS2
Coexpression	MM1024	BURTON_ADIPOGENESIS_PEAK_AT_0HR	M2:CGP: Chemical and Genetic Perturbations	2.994e-07	0.002791	1.163e-05	0.000113	10	69	TPM1,ACTA2,NREP,MYL9,COL8A1,ISG15,RASL11B,GAS1,GAS2,THBS2
Coexpression Atlas	gudmap_kidney_P0_JuxtaGlom_Ren1_100	kidney_P0_JuxtaGlom_Ren1_top-relative-expression-ranked_100	Gudmap Mouse MOE430.2	3.059e-07	0.001199	2.653e-06	2.348e-05	12	87	PENK,ACTA2,ACTG2,CNN1,COL12A1,RGS5,IGFBP7,PRKG1,MYH11,KCNMB1,TAGLN,AADAT
Coexpression Atlas	gudmap_developingKidney_e15.5_Podocyte cells_200	DevelopingKidney_e15.5_Podocyte cells_emap-27915_top-relative-expression-ranked_200	Gudmap Mouse MOE430.2	3.254e-07	0.001275	2.816e-06	2.492e-05	16	160	EYA4,PENK,ACTG2,ABCA9,CNTN1,FOXC2,COL9A1,PODXL,WT1,DKK3,MYH11,GBP1,CYRIA,MAFB,TBX18,TNFAIP2
Coexpression Atlas	gudmap_kidney_e15.5_Podocyte_MafB_1000	kidney_e15.5_Podocyte_MafB_top-relative-expression-ranked_1000	Gudmap Mouse MOE430.2	3.271e-07	0.001282	2.824e-06	2.5e-05	41	815	TPM2,EYA4,PDE4D,PENK,ACTA2,ACTG2,CLCN5,HOXD11,PGAP1,ARHGAP29,SLITRK6,FOXC1,FOXC2,SFRP1,STARD4,RGS5,PODXL,WT1,SOSTDC1,CCDC80,CRABP2,AKAP12,POSTN,MOXD1,IGFBP7,IL17RD,ARHGAP24,GAS2,GATA3,AIF1L,NTM,NRK,BUB1,ZNF558,MAFB,NOVA1,KRT7,SEMA3D,AADAT,TPBG,EPHA3
Coexpression Atlas	gudmap_dev gonad_e13.5_F_VascAssocMesenchStromOvary_MafB_k3_500	dev gonad_e13.5_F_VascAssocMesenchStromOvary_MafB_k-means-cluster#3_top-relative-expression-ranked_500	Gudmap Mouse ST 1.0	3.291e-07	0.00129	2.836e-06	2.51e-05	14	122	ACTA2,ADCY2,FBN2,COL6A3,SFRP1,POSTN,NKD1,BGN,NRK,CALD1,EDNRA,HMCN1,EGR2,EPHA3
Coexpression Atlas	gudmap_kidney_P2_CapMes_Crym_500	kidney_P2_CapMes_Crym_top-relative-expression-ranked_500	Gudmap Mouse MOE430.2	3.31e-07	0.001298	2.845e-06	2.519e-05	22	292	TPM2,EYA4,RAMP2,PENK,MEIS2,FBN2,HOXD11,FOXC2,SEMA3F,TNC,WT1,CRABP2,OSR1,IL17RD,GAS2,LAMP5,DCX,NUAK1,DTNA,EDNRA,HMCN1,CDH2
Coexpression Atlas	gudmap_developingGonad_P2_epididymis_1000_k5	DevelopingGonad_P2_epididymis_emap-30199_k-means-cluster#5_top-relative-expression-ranked_1000	Gudmap Mouse MOE430.2	3.403e-07	0.001334	2.919e-06	2.584e-05	15	141	ACTA2,LTBP4,CNN1,MYH11,HTRA1,MYLK,INHBA,BGN,NFIB,NRK,TAGLN,DPYSL3,ADAMTS5,THBS2,RASD2
Coexpression Atlas	gudmap_dev gonad_e11.5_F_ReproVasc_Flk_1000	dev gonad_e11.5_F_ReproVasc_Flk_top-relative-expression-ranked_1000	Gudmap Mouse ST 1.0	3.487e-07	0.001367	2.984e-06	2.642e-05	41	817	PDE4D,RAMP2,RHOJ,MCAM,HLX,RFTN2,FABP5,ARHGAP31,ARHGAP29,PLN,MAP4K4,FKBP1A,FOXC2,COL4A1,BIN1,STARD4,STIL,CRIP2,CRMP1,SMTN,ARHGDIB,CYYR1,LIMCH1,SNCG,H19,DOCK11,SLFN5,PDE10A,CCDC3,ARHGEF9,ST8SIA4,DPYSL3,SASH1,UACA,LCP1,HMCN1,EGR2,TJP1,TNFAIP2,UBASH3B,PLEKHO1
Coexpression	M5652	FARMER_BREAST_CANCER_BASAL_VS_LULMINAL	C2:CGP: Chemical and Genetic Perturbations	3.54e-07	0.0033	1.369e-05	0.000133	21	329	CDKN2A,MCM5,TRIM29,FABP5,FOXC1,SEMA3F,LRP12,RGS5,STIL,SCUBE2,GATA3,SYNC,MELK,FBXL7,NFIB,BUB1,ARHGEF9,TSC22D3,TFAP2A,DHRS2,TPBG
Coexpression Atlas	gudmap_developingGonad_e11.5_ovary + mesonephros_200	DevelopingGonad_e11.5_ovary + mesonephros_emap-3226_top-relative-expression-ranked_200	Gudmap Mouse MOE430.2	3.543e-07	0.001389	3.026e-06	2.679e-05	16	161	TPM1,MEIS2,CSRNP3,MEX3B,COL9A1,SFSWAP,CRABP2,CRMP1,PRKG1,RBM26,NEFL,NFIB,DPYSL3,RGS4,GSK3B,KATNBL1
Coexpression	M45708	HE_LIM_SUN_FETAL_LUNG_C1_PROXIMAL_SECRETORY_2_CELL	C8: Cell Type Signature	3.568e-07	0.003326	1.374e-05	0.0001336	20	301	MCC,TRIM22,SLITRK6,CNTN1,SOSTDC1,CCDC80,RND3,ARHGDIB,LYPD3,GLIPR2,NTM,MAFB,WNK2,KRT7,DPYSL3,DUSP4,PSCA,TFAP2A,SEMA3D,SOX21
Coexpression Atlas	Facebase_RNAseq_e8.5_Paraxial Mesoderm_1000_K4	FacebaseRNAseq_e8.5_Paraxial Mesoderm_top-relative-expression-ranked_1000_k-means-cluster#4	FaceBase_RNAseq	3.636e-07	0.001425	3.099e-06	2.743e-05	20	247	TTYH1,KIAA1549L,SEMA5B,MMP11,LTBP4,IGLON5,COL8A1,DPYSL4,APLP1,ZNF43,NCAM2,DCX,ASTN2,WNK2,SHANK1,DTNA,MAMLD1,GPR137C,SENP7,EPHA3
Coexpression	M2013	MIKKELSEN_NPC_ICP_WITH_H3K4ME3	C2:CGP: Chemical and Genetic Perturbations	3.668e-07	0.00342	1.407e-05	0.0001367	25	449	RHOJ,ATXN7L1,RFTN2,HMMR,ABCA9,CLCN5,CSRNP3,CPT1C,SLITRK6,PCYT1B,TRIM46,LRRN3,CTNS,ZC4H2,DENND2B,RBMS3,ARHGEF9,SYT1,IFI44L,EHBP1,SLC12A6,CALD1,DTNA,AADAT,ARMH4
Coexpression	M4694	GSE2706_UNSTIM_VS_8H_R848_DC_DN	C7:IMMUNESIGDB: ImmuneSigDB	3.764e-07	0.003509	1.438e-05	0.0001397	16	197	TNC,SESN3,IFIT1,ARL4D,MOXD1,ISG15,UHRF1,IFI6,ARHGAP24,INHBA,GBP1,MARCKSL1,SLFN5,CYRIA,DUSP4,TNFAIP2
Coexpression Atlas	gudmap_developingKidney_e14.5 whole kidney - Wnt4 KO_100	DevelopingKidney_e14.5 whole kidney - Wnt4 KO_emap-6674_top-relative-expression-ranked_100	Gudmap Mouse MOE430.2	3.822e-07	0.001498	3.25e-06	2.877e-05	11	73	MEIS2,CSRNP3,PDE5A,DCX,NFIB,CALD1,LSM12,TGFB2,TBX18,SEMA3D,LY6H
Coexpression	M45677	HE_LIM_SUN_FETAL_LUNG_C0_MID_AIRWAY_SMC_1_CELL	C8: Cell Type Signature	3.943e-07	0.003675	1.5e-05	0.0001458	10	71	TRAF5,EYA4,ACTG2,CNN1,RASL11B,MYH11,HTRA1,KCNMB1,ZEB1,LTBP2
GO: Biological Process	GO:0060485	mesenchyme development		4.247e-07	0.002432	3.576e-05	0.0003301	30	497	ACTA2,ACTG2,SEMA5B,FOXC1,FOXC2,SEMA3F,TEAD2,SFRP1,FN1,WT1,DKK1,ZFP64,DLL3,OSR1,GLIPR2,IL17RD,GATA3,MEIS3,SEPTIN6,DLX2,ADAMTS5,TFAP2A,GSK3B,EDNRA,TGFB2,SEMA3D,GREM1,CDH2,PHLDB2,EPHA3
Coexpression	M15425	VANTVEER_BREAST_CANCER_ESR1_DN	C2:CGP: Chemical and Genetic Perturbations	4.281e-07	0.003991	1.622e-05	0.0001577	17	224	TTYH1,MCM5,TRIM29,ANLN,UBE2E3,FOXC1,BIN1,MRAS,STIL,GBP1,MELK,TMCC2,BUB1,GLIPR1,KRT7,CDCA8,CDK2AP1
Coexpression Atlas	gudmap_developingLowerUrinaryTract_e13.5_bladder neck-urethr mesench_500_k2	DevelopingLowerUrinaryTract_e13.5_bladder neck-urethr mesench_emap-3087_k-means-cluster#2_top-relative-expression-ranked_500	Gudmap Mouse MOE430.2	4.455e-07	0.001746	3.768e-06	3.335e-05	13	107	CNTN1,COL8A1,CRMP1,SPOCK1,C11orf87,NCAM2,DCX,NEFL,SYT11,STMN3,GRIN3A,ADAMTS5,RGS4
Coexpression Atlas	gudmap_developingLowerUrinaryTract_P1_bladder_J_1000_k4	DevelopingLowerUrinaryTract_P1_bladder_J_emap-30374_k-means-cluster#4_top-relative-expression-ranked_1000	Gudmap Mouse MOE430.2	4.46e-07	0.001748	3.768e-06	3.335e-05	12	90	TUBB3,SLITRK6,CNTN1,COL8A1,TNC,SPOCK1,C11orf87,DCX,NEFL,STMN3,RGS4,RBFOX2
Coexpression Atlas	Facebase_RNAseq_e8.5_Floor Plate_500_K4	FacebaseRNAseq_e8.5_Floor Plate_top-relative-expression-ranked_500_k-means-cluster#4	FaceBase_RNAseq	4.46e-07	0.001748	3.768e-06	3.335e-05	12	90	TTYH1,MAP2,REEP2,TUBB3,MGAT5B,POU3F1,DLL3,SYT11,DTNA,GAL3ST4,TLE4,TOX2
Coexpression	M157	GRYDER_PAX3FOXO1_ENHANCERS_IN_TADS	C2:CGP: Chemical and Genetic Perturbations	4.462e-07	0.004159	1.684e-05	0.0001636	41	1009	EPHB2,VGLL3,EYA4,MCC,MEIS2,CLCN5,ANLN,PKM,ARHGAP29,ALDH1A3,MAP4K4,SDC1,MEX3B,RBM38,COL4A1,CEP85,RAE1,PODXL,OLFML2B,CDC42EP3,LIMCH1,PRKG1,IL17RD,ADAM19,GAS1,ST6GAL2,CYRIA,FBXL7,NFIB,CCDC3,ASTN2,KCNMB4,NKAIN1,DPYSL3,SASH1,NCS1,TTLL7,CDK2AP1,NAT10,VASH2,PHLDB2
Coexpression Atlas	gudmap_dev gonad_e11.5_M_ReproVasc_Flk_1000	dev gonad_e11.5_M_ReproVasc_Flk_top-relative-expression-ranked_1000	Gudmap Mouse ST 1.0	4.568e-07	0.001791	3.851e-06	3.408e-05	40	795	PDE4D,RAMP2,RHOJ,MCAM,HLX,RFTN2,FABP5,ARHGAP31,ARHGAP29,FKBP1A,FOXC1,FOXC2,COL4A1,STARD4,STIL,SP110,CDC42EP3,CRIP2,CRMP1,SMTN,ARHGDIB,CYYR1,LIMCH1,SNCG,H19,DOCK11,TUBB2B,SLFN5,PDE10A,FBXL7,CCDC3,ST8SIA4,SASH1,UACA,LCP1,HMCN1,TJP1,TNFAIP2,UBASH3B,PLEKHO1
Coexpression	M3395	MARTORIATI_MDM4_TARGETS_FETAL_LIVER_DN	C2:CGP: Chemical and Genetic Perturbations	4.589e-07	0.004278	1.725e-05	0.0001676	27	518	RCBTB2,FZD1,CLCN5,PLN,AGAP3,COL9A1,STARD4,SFSWAP,TNC,POGK,POSTN,CELF1,ZKSCAN1,NRK,BUB1,NNAT,PCBP4,DPYSL3,CNTRL,GAL3ST4,LCP1,LPAR1,ISG20L2,PBX3,CDH2,RBFOX2,EPHA3
Coexpression	M8220	GSE22443_NAIVE_VS_ACT_AND_IL2_TREATED_CD8_TCELL_DN	C7:IMMUNESIGDB: ImmuneSigDB	4.616e-07	0.004303	1.728e-05	0.0001679	16	200	PENK,ALDH1A3,FHL1,LTBP4,COL4A1,SEMA3F,COL6A3,FN1,ID3,CCDC80,PREPL,H19,GAS1,DENND2B,SYT11,DDR1
Coexpression Atlas	Facebase_RNAseq_e9.5_Maxillary Arch_2500_K1	FacebaseRNAseq_e9.5_Maxillary Arch_top-relative-expression-ranked_2500_k-means-cluster#1	FaceBase_RNAseq	4.635e-07	0.001817	3.899e-06	3.451e-05	33	589	PDE4D,RFTN2,FZD1,SLITRK6,COL9A1,COL9A2,RGS5,OLFML2B,ZFP14,SP110,POSTN,ARHGDIB,MOXD1,ZKSCAN1,OSR1,RASL11B,LIMCH1,ATP2B4,DKK2,ARHGAP24,BGN,COL24A1,OLFML1,NRK,ARHGEF9,MAFB,KAZN,GRIN3A,DNMT3A,CACNA1C,KRT7,SERTAD4,UBASH3B
Coexpression	M8790	GSE37605_FOXP3_FUSION_GFP_VS_IRES_GFP_TREG_C57BL6_DN	C7:IMMUNESIGDB: ImmuneSigDB	4.697e-07	0.004379	1.751e-05	0.0001702	15	176	CSMD3,ARHGAP29,FHL1,ID3,CCDC80,IFIT1,AKAP12,RND3,CYYR1,RASL11B,PDE5A,GAS1,TAGLN,EHBP1,ADAMTS5
Coexpression	M9483	SUNG_METASTASIS_STROMA_UP	C2:CGP: Chemical and Genetic Perturbations	4.771e-07	0.004448	1.768e-05	0.0001718	12	110	FABP5,FHL1,COL12A1,TNC,CRABP2,CDC42EP3,DKK1,IFI6,DCBLD2,ANOS1,UACA,THBS2
Coexpression	M39171	MURARO_PANCREAS_PANCREATIC_POLYPEPTIDE_CELL	C8: Cell Type Signature	4.779e-07	0.004455	1.768e-05	0.0001718	14	153	CTTNBP2,MAP2,TENM2,MEIS2,FABP5,SLITRK6,APLP1,AKAP12,SPOCK1,DDR1,DPYSL3,ZNF503,INA,EGR2
GO: Cellular Component	GO:0043005	neuron projection		4.825e-07	0.0003088	5.146e-05	0.0003623	70	1788	EPHB2,IGSF8,EPHB6,TTYH1,CTTNBP2,MAP2,ASIC2,PENK,CNTNAP3,TENM2,ADCY2,PICALM,FZD1,TUBB3,TUBB4A,CPT1C,KIF17,FKBP1A,PLS3,CNTN1,BEGAIN,TRIM46,BIN1,SEPTIN5,NLGN4Y,CRMP1,WDR47,NSG1,GIGYF2,SNCG,ATP2B4,CNTNAP3B,SPOCK1,NCAM2,LAMP5,DCX,SEPTIN6,SEPTIN2,NEFL,SYT11,NFIB,STMN3,NTM,NECTIN1,SYT1,SGCE,KIF3C,GRIN3A,WASF1,SHANK1,SLC12A6,CACNA1C,DPYSL3,CALD1,PLXDC1,DTNA,CAMK2G,STMN1,UBXN1,LPAR1,RGS12,GSK3B,NCS1,OPRK1…
Coexpression	M2386	GILDEA_METASTASIS	C2:CGP: Chemical and Genetic Perturbations	4.999e-07	0.00466	1.842e-05	0.000179	7	29	MYL9,FN1,ARHGDIB,GBP1,TAGLN,GLIPR1,DUSP4
Coexpression Atlas	GSM777059_100	Stromal Cells, LEC.MLN, gp38+ CD31+, Lymph Node, avg-4	Immgen.org, GSE15907	5.04e-07	0.001976	4.23e-06	3.744e-05	12	91	RAMP2,ARHGAP29,LTBP4,COL12A1,FN1,TNC,CRIP2,IGFBP7,BGN,NFIB,SEMA3D,TJP1
Coexpression	M39245	LAKE_ADULT_KIDNEY_C26_MESANGIAL_CELLS	C8: Cell Type Signature	5.052e-07	0.004709	1.854e-05	0.0001802	15	177	MEIS2,COL4A1,COL12A1,AKAP12,POSTN,IGFBP7,PRKG1,SPOCK1,GAS2,GATA3,FBXL7,RBMS3,CALD1,UACA,TJP1
Coexpression Atlas	gudmap_developingLowerUrinaryTract_e14.5_ urogenital sinus_200	DevelopingLowerUrinaryTract_e14.5_ urogenital sinus_emap-5517_top-relative-expression-ranked_200	Gudmap Mouse MOE430.2	5.374e-07	0.002107	4.501e-06	3.984e-05	16	166	BACH2,TUBB3,PCDH10,COL9A1,C11orf87,BRINP1,DCX,NEFL,SULF1,STMN3,GRIN3A,RGS4,TGFB2,ENTPD3,RBFOX2,EPHA3
Coexpression	M17728	BLALOCK_ALZHEIMERS_DISEASE_DN	C2:CGP: Chemical and Genetic Perturbations	5.465e-07	0.005095	1.998e-05	0.0001941	47	1248	EPHB2,PDE4D,ASIC2,PENK,NREP,REEP2,ADCY2,ENOPH1,ARIH2,FHL1,UBE2E3,CAP2,COL4A1,LRP12,FN1,IFIT1,PREPL,AKAP12,CRMP1,LRRN3,MOXD1,SNCG,SNRPN,ATP5F1C,B4GALNT1,BRINP1,SEPTIN6,NEFL,ANOS1,STMN3,ARHGEF9,SYT1,KIF3C,NNAT,WASF1,RAB6A,SHANK1,NT5E,ACTR3B,RGS4,INA,ENTPD3,PAK3,PSME3,R3HDM1,PSPC1,TPBG
Coexpression Atlas	gudmap_developingLowerUrinaryTract_P2_bladder urothelium (LCM)_500_k4	DevelopingLowerUrinaryTract_P2_bladder urothelium (LCM)_emap-30380_k-means-cluster#4_top-relative-expression-ranked_500	Gudmap Mouse MOE430.2	5.536e-07	0.00217	4.627e-06	4.095e-05	8	35	ACTA2,ACTG2,RGS5,SCUBE2,MYH11,C11orf87,NIPAL4,THBS2
Coexpression Atlas	PCBC_ratio_PulmonMicrovasc_vs_SC_2X-p05	Pulmonary Microvascular_vs_Pluripotent Stem Cells-fold2.0_adjp0.05	PCBC_AltAnalyze	5.755e-07	0.002256	4.8e-06	4.249e-05	70	1803	EPHB2,CDKN2A,RAMP2,RHOJ,CNTNAP3,MCAM,FAM89B,FABP5,ARHGAP31,ANLN,EVA1A,ARHGAP29,AMOTL2,FKBP1A,FOXC2,TOM1L2,COL4A1,SEMA3F,JCAD,COL8A1,COL13A1,FN1,CRIP2,AKAP12,SMTN,WDR47,POSTN,ARHGDIB,DKK1,IGFBP7,GLIPR2,ITPRIP,CCN2,SNCG,ATP2B4,DKK3,CNTNAP3B,PRSS2,HTRA1,ARHGAP24,SPOCK1,GATA2,P4HA3,FJX1,BGN,SULT1E1,CYRIA,FBXL7,NFIB,DDHD2,GLIPR1,KRT7,ZEB1,SASH1,UACA,NT5E,TAMALIN,RGS4,MSRB3,TGFB2,TBX18,NBPF15,LMNA,FRMD…
GO: Biological Process	GO:0048514	blood vessel morphogenesis		5.821e-07	0.003333	4.831e-05	0.0004459	48	1042	EPHB2,EPHB6,RAMP2,RHOJ,MCAM,E2F7,HLX,FBN2,PKM,AMOTL2,FOXC1,FOXC2,COL4A1,JCAD,COL8A1,TEAD2,SFRP1,FN1,SGCD,WNT7A,WT1,IGFBP7,CCN2,DCBLD2,ATP2B4,ARHGAP24,MYLK,GATA2,MARCKSL1,SULF1,ARHGEF9,SLC12A6,SASH1,CALD1,PLXDC1,LPAR1,GSK3B,EDNRA,TGFB2,THBS2,TJP1,CCBE1,VASH2,PSME3,TNFAIP2,GREM1,CDH2,SMAD1
Coexpression Atlas	GSM777032_500	Stromal Cells, BEC.MLN, gp38- CD31+, Lymph Node, avg-5	Immgen.org, GSE15907	5.853e-07	0.002294	4.871e-06	4.312e-05	28	456	RAMP2,RHOJ,MCAM,HLX,EHD3,ARHGAP31,ARHGAP29,LTBP4,PLS3,COL4A1,SEMA3F,JCAD,PODXL,ID3,CRIP2,IGFBP7,CYYR1,SNCG,BGN,OLFML2A,FBXL7,NFIB,DPYSL3,SASH1,UACA,TAMALIN,TJP1,LTBP2
Coexpression	M13547	TURASHVILI_BREAST_LOBULAR_CARCINOMA_VS_LOBULAR_NORMAL_DN	C2:CGP: Chemical and Genetic Perturbations	5.857e-07	0.00546	2.133e-05	0.0002073	10	74	MMP11,CAP2,COL4A1,COL6A3,COL8A1,COL12A1,FN1,POSTN,BGN,THBS2
GO: Cellular Component	GO:0015629	actin cytoskeleton		5.952e-07	0.0003809	5.441e-05	0.000383	32	565	TPM1,TPM2,CTTNBP2,MAP2,ACTA2,MYL9,ANLN,PLS3,CNN1,BIN1,SEPTIN5,CDC42EP3,CRMP1,SMTN,TTC17,LIMCH1,MYADM,MYH11,MYLK,GAS2,GBP1,AIF1L,SEPTIN2,TAGLN,WASF1,DPYSL3,CALD1,LCP1,TJP1,CDH2,EPB41,EPHA3
Coexpression Atlas	Facebase_RNAseq_e9.5_Olfactory Placode_1000_K2	FacebaseRNAseq_e9.5_Olfactory Placode_top-relative-expression-ranked_1000_k-means-cluster#2	FaceBase_RNAseq	6.095e-07	0.002389	5.062e-06	4.48e-05	18	210	MEIS2,TUBB3,KIAA1549L,FHL1,LTBP4,COL8A1,ZNF43,NCAM2,DCX,SHANK1,DTNA,MAMLD1,GAL3ST4,SOX21,TOX2,EPB41,SENP7,EPHA3
Coexpression	MM986	MCBRYAN_PUBERTAL_BREAST_3_4WK_UP	M2:CGP: Chemical and Genetic Perturbations	6.206e-07	0.005785	2.251e-05	0.0002187	17	230	FZD1,PROM2,SDC1,CNN1,COL8A1,TEAD2,COL9A1,SFRP1,FN1,TNC,MYH11,GAS1,GATA3,MAFB,KRT7,EDNRA,EGR2
Coexpression	M16975	NAKAMURA_TUMOR_ZONE_PERIPHERAL_VS_CENTRAL_UP	C2:CGP: Chemical and Genetic Perturbations	6.306e-07	0.005878	2.278e-05	0.0002214	19	284	TPM1,MCM5,HMMR,FST,COL4A1,COL12A1,FN1,PODXL,CCDC80,AKAP12,RND3,DKK3,ADAM19,INHBA,TUBA1A,GLIPR1,KRT7,CALD1,PSME3
GO: Biological Process	GO:0043010	camera-type eye development		6.37e-07	0.003647	5.211e-05	0.000481	38	736	EPHB2,RHOJ,CADM4,FBN2,ALDH1A3,SLITRK6,FOXC1,FOXC2,COL4A1,COL8A1,SFRP1,FN1,WNT7A,WT1,CELF1,UHRF1,CTNS,ATP2B4,MIAT,DKK3,INHBA,GAS1,GATA3,FJX1,MARCKSL1,DCX,NFIB,NECTIN1,MAFB,DLX2,TMEM231,CACNA1C,ZEB1,TFAP2A,ZNF503,TGFB2,SOX21,CDH2
Coexpression Atlas	gudmap_dev gonad_e11.5_F_GonMes_Sma_k3_500	dev gonad_e11.5_F_GonMes_Sma_k-means-cluster#3_top-relative-expression-ranked_500	Gudmap Mouse ST 1.0	6.384e-07	0.002503	5.28e-06	4.673e-05	15	148	MAP2,TUBB4A,CNN1,RGS5,CCDC80,CRABP2,POSTN,OSR1,CCN2,PRKG1,NRK,KRT7,LPAR1,EGR2,CDH12
Coexpression Atlas	gudmap_kidney_adult_RenCorpuscGlomer_k4_1000	kidney_adult_RenCorpuscGlomer_k-means-cluster#4_top-relative-expression-ranked_1000	Gudmap Mouse MOE430.2	6.384e-07	0.002503	5.28e-06	4.673e-05	15	148	TRPC4,PICALM,CCDC80,CDC42EP3,POSTN,PDE5A,CCN2,PRKG1,DKK2,GATA3,BGN,CALD1,NT5E,ADAMTS5,EPHA3
Coexpression Atlas	gudmap_developingGonad_e11.5_ovary + mesonephros_k4_200	DevelopingGonad_e11.5_ovary + mesonephros_emap-3226_k-means-cluster#4_top-relative-expression-ranked_200	Gudmap Mouse MOE430.2	6.424e-07	0.002518	5.301e-06	4.692e-05	7	25	COL9A1,CRABP2,CRMP1,RBM26,NEFL,DPYSL3,RGS4
Coexpression	M259	MANALO_HYPOXIA_UP	C2:CGP: Chemical and Genetic Perturbations	6.432e-07	0.005996	2.315e-05	0.000225	16	205	TPM1,COL4A1,KLF11,COL9A1,LIMCH1,DKK3,HTRA1,SPOCK1,INHBA,GDF10,BGN,NUAK1,GPC1,NARF,CDH2,PLEKHO1
Coexpression Atlas	PCBC_ratio_ECTO blastocyst_vs_ECTO amniotic fluid MSC_cfr-2X-p05	ECTO blastocyst_vs_ECTO amniotic fluid MSC-Confounder_removed-fold2.0_adjp0.05	PCBC_AltAnalyze	6.603e-07	0.002588	5.437e-06	4.813e-05	21	280	TRIM22,MEIS2,FABP5,PCDH10,COL9A2,LMF1,TNC,NLRP2,LRRN3,DKK1,RASL11B,IFI6,ATP2B4,SPOCK1,GATA3,ST6GAL2,TSPAN17,ZNF558,MAFB,EDNRA,PLEKHG4B
Coexpression Atlas	gudmap_dev lower uro neuro_e15.5_BladdPelvicGanglion_Sox10_k4_200	dev lower uro neuro_e15.5_BladdPelvicGanglion_Sox10_k-means-cluster#4_top-relative-expression-ranked_200	Gudmap Mouse ST 1.0	6.773e-07	0.002655	5.566e-06	4.926e-05	10	62	TUBB3,SLITRK6,PCDH10,POSTN,NCAM2,DCX,NRK,SYT1,NOVA1,INA
GO: Biological Process	GO:0051094	positive regulation of developmental process		6.784e-07	0.003885	5.471e-05	0.000505	69	1755	EPHB2,CDKN2A,RAMP2,ASIC2,HLX,PICALM,FBN2,HOXD11,PKM,SLITRK6,FST,FOXC1,FOXC2,JCAD,ISLR2,BIN1,SFRP1,FN1,CHODL,TNC,WNT7A,WT1,SLITRK3,CRABP2,LRRN3,SCUBE2,DKK1,CELF1,ISG15,DLL3,OSR1,GLIPR2,PDE5A,CCN2,INHBA,GATA2,GATA3,BRINP1,ZC4H2,GDF10,DCX,SULT1E1,NEFL,CCDC3,SYT1,DLX2,DDHD2,SHANK1,GPC1,ZEB1,SASH1,TFAP2A,LPAR1,GSK3B,EDNRA,TGFB2,TBX18,THBS2,LMNA,EGR2,TJP1,CCBE1,VASH2,PAK3,SLC7A5,GREM1,SMAD1,PHLDB2,TPBG
Coexpression Atlas	Facebase_RNAseq_e10.5_Neural Epithelium Overlying Medial Eminence_500_K2	FacebaseRNAseq_e10.5_Neural Epithelium Overlying Medial Eminence_top-relative-expression-ranked_500_k-means-cluster#2	FaceBase_RNAseq	6.839e-07	0.002681	5.609e-06	4.965e-05	13	111	TENM2,TUBB3,PCDH10,DPYSL4,POU3F1,CRMP1,RND3,DCX,STMN3,NNAT,GPC1,DDR1,CBFA2T3
Coexpression Atlas	gudmap_developingGonad_e18.5_epididymis_1000_k3	DevelopingGonad_e18.5_epididymis_emap-13166_k-means-cluster#3_top-relative-expression-ranked_1000	Gudmap Mouse MOE430.2	6.998e-07	0.002743	5.727e-06	5.069e-05	21	281	MEIS2,ARHGAP31,SLITRK6,PCDH10,COL8A1,COL12A1,SFSWAP,ZNF43,DOCK11,GATA2,AIF1L,RBMS3,NFIB,SGCE,DNMT3A,GSK3B,TGFB2,SEMA3D,KATNBL1,R3HDM1,SENP7
Coexpression	MM863	MIKKELSEN_NPC_ICP_WITH_H3K4ME3	M2:CGP: Chemical and Genetic Perturbations	7.008e-07	0.006533	2.513e-05	0.0002442	26	497	RHOJ,ATXN7L1,RFTN2,HMMR,ABCA9,CLCN5,CSRNP3,CPT1C,SLITRK6,PCYT1B,TRIM46,LRRN3,ZNF43,CTNS,ZC4H2,DENND2B,RBMS3,ARHGEF9,SYT1,IFI44L,EHBP1,SLC12A6,CALD1,DTNA,AADAT,ARMH4
GO: Biological Process	GO:0030902	hindbrain development		7.162e-07	0.004101	5.696e-05	0.0005257	22	302	EPHB2,CNTN1,FOXC1,NLGN4Y,WNT7A,CRABP2,GAS1,GATA2,MEIS3,GDF10,NEFL,TUBA1A,NFIB,MAFB,TFAP2A,LPAR1,ZNF503,SEMA3D,EGR2,CDH2,SMAD1,RBFOX2
Coexpression Atlas	DevelopingLowerUrinaryTract_e14.5_ urethra_emap-30902_200	DevelopingLowerUrinaryTract_e14.5_ urethra_emap-30902_top-relative-expression-ranked_200	Gudmap Mouse MOE430.2	7.412e-07	0.002906	6.052e-06	5.357e-05	16	170	CTTNBP2,ACTG2,SLITRK6,CNN1,COL8A1,TNC,MYH11,SPOCK1,NEFL,NRK,ST8SIA4,TFAP2A,MSRB3,ENTPD3,RBFOX2,EPHA3
Coexpression Atlas	gudmap_developingGonad_P2_testes_500	DevelopingGonad_P2_testes_emap-30171_top-relative-expression-ranked_500	Gudmap Mouse MOE430.2	7.426e-07	0.002911	6.052e-06	5.357e-05	26	408	TTYH1,REEP2,TUBB3,MYL9,SEMA5B,LTBP4,SFRP1,DPYSL4,OSR1,MYH11,INHBA,TUBB2B,NRK,NNAT,TAGLN,PCBP4,DDR1,DPYSL3,CALD1,NT5E,DTNA,ADAMTS5,EDNRA,PAK3,LY6E,EPHA3
Coexpression	M13273	DELYS_THYROID_CANCER_DN	C2:CGP: Chemical and Genetic Perturbations	7.437e-07	0.006932	2.656e-05	0.0002581	17	233	MEIS2,FABP5,FHL1,PLN,SFRP1,SGCD,ID3,AKAP12,GAS1,PDE10A,GDF10,TSC22D3,LPAR1,SEMA3D,EGR2,TLE4,EPHA3
Coexpression Atlas	PCBC_ratio_EB_from-plasmid_vs_EB_from-ESC_cfr-2X-p05	Embryoid Body Cells-method_plasmid_vs_Embryoid Body Cells-method_NA-Confounder_removed-fold2.0_adjp0.05	PCBC_AltAnalyze	7.59e-07	0.002975	6.173e-06	5.464e-05	13	112	MAP2,TUBB3,MGAT5B,SNCG,BRINP1,DCX,SEPTIN6,CYRIA,MAFB,NOVA2,INA,LY6H,ARHGAP19
Coexpression Atlas	Facebase_RNAseq_e10.5_Neural Epithelium Overlying Central Eminence_2500_K1	FacebaseRNAseq_e10.5_Neural Epithelium Overlying Central Eminence_top-relative-expression-ranked_2500_k-means-cluster#1	FaceBase_RNAseq	7.771e-07	0.003046	6.307e-06	5.582e-05	19	236	PENK,REEP2,TUBB4A,SFRP1,POU3F1,CCDC80,POSTN,MANBAL,SNRPN,MYCL,MYADM,HTRA1,MELK,OLFML2A,CYRIA,TSC22D3,PIANP,INA,TLE4
Coexpression	M18274	VANHARANTA_UTERINE_FIBROID_UP	C2:CGP: Chemical and Genetic Perturbations	7.791e-07	0.007263	2.772e-05	0.0002694	8	44	MMP11,COL4A1,COL9A2,FN1,CRMP1,SULF1,EDNRA,LTBP2
Coexpression Atlas	DevelopingLowerUrinaryTract_e14.5_ urogenital sinus_emap-6689_k5_200	DevelopingLowerUrinaryTract_e14.5_ urogenital sinus_emap-6689_k-means-cluster#5_top-relative-expression-ranked_200	Gudmap Mouse MOE430.2	7.853e-07	0.003078	6.36e-06	5.63e-05	9	49	CNTN1,C11orf87,NCAM2,DCX,NEFL,STMN3,GRIN3A,RGS4,INA
Coexpression Atlas	gudmap_dev gonad_e11.5_F_GonMes_Sma_500	dev gonad_e11.5_F_GonMes_Sma_top-relative-expression-ranked_500	Gudmap Mouse ST 1.0	7.921e-07	0.003105	6.402e-06	5.667e-05	27	436	MAP2,TUBB4A,MYL9,FST,CNN1,SFRP1,RGS5,PODXL,WT1,CCDC80,CRABP2,CDC42EP3,RND3,POSTN,OSR1,CCN2,PRKG1,DENND2B,OLFML1,SULF1,NRK,KRT7,CALD1,LPAR1,EDNRA,EGR2,CDH12
Coexpression Atlas	gudmap_developingLowerUrinaryTract_e14.5_ bladder_200	DevelopingLowerUrinaryTract_e14.5_ bladder_emap-30872_top-relative-expression-ranked_200	Gudmap Mouse MOE430.2	8.02e-07	0.003144	6.462e-06	5.719e-05	16	171	ACTG2,UPK3A,SLITRK6,PDE5A,PRKG1,MYH11,GBP1,C11orf87,NFIB,NRK,ST8SIA4,CALD1,ACTR3B,GSK3B,MSRB3,RBFOX2
Coexpression Atlas	gudmap_RNAseq_e15.5_Mesangium_2500_K2	gudmap_RNAseq_e15.5_Mesangium_2500_K2	Gudmap RNAseq	8.027e-07	0.003147	6.462e-06	5.719e-05	55	1298	TPM2,EYA4,RAMP2,FAM89B,MCM5,NREP,REEP2,FZD1,TUBB4A,FBN2,UBE2H,LTBP4,CNN1,PDZD4,TEAD2,FN1,SEPTIN5,ID3,CLDND1,CRABP2,AKAP12,SCUBE2,NKD1,DKK1,NSG1,GLIPR2,DKK3,ATP5F1C,MYADM,ARHGAP24,ADAM19,INHBA,MARCKSL1,BRINP1,AIF1L,DCX,NEFL,FBXL7,OLFML1,RBMS3,NTM,NRK,NNAT,TMEM231,PCBP4,CTXN1,GPC1,GLIPR1,STMN1,UBXN1,NCS1,THBS2,CCBE1,SERTAD4,PHLDB2
Coexpression	M1991	MASRI_RESISTANCE_TO_TAMOXIFEN_AND_AROMATASE_INHIBITORS_DN	C2:CGP: Chemical and Genetic Perturbations	8.223e-07	0.007665	2.914e-05	0.0002832	6	20	ACTG2,FBN2,CCN2,TAGLN,CALD1,NT5E
Coexpression	M5311	HOSHIDA_LIVER_CANCER_SUBCLASS_S1	C2:CGP: Chemical and Genetic Perturbations	8.376e-07	0.007808	2.958e-05	0.0002874	17	235	TPM2,TRAF5,ACTA2,COL4A1,ID3,CRABP2,CRIP2,POSTN,ARHGDIB,CCN2,TAGLN,GLIPR1,DDR1,LCP1,CDK2AP1,SLC7A5,LTBP2
Coexpression Atlas	GSM854302_500	Stromal Cells, Ep.MEChi.Th, CD45-EpCAm+Ly51-MHCIIhi, Thymus, avg-1	Immgen.org, GSE15907	8.524e-07	0.003341	6.847e-06	6.06e-05	26	411	EYA4,NREP,MEIS2,PLS3,SFRP1,COL12A1,FN1,RGS5,TNC,IFIT1,RND3,SNCG,MYH11,MARCKSL1,DENND2B,NECTIN1,SYT1,KRT7,DUSP4,RGS4,SLC7A8,LMNA,TJP1,TNFAIP2,GREM1,RASD2
Coexpression	M19128	HELLEBREKERS_SILENCED_DURING_TUMOR_ANGIOGENESIS	C2:CGP: Chemical and Genetic Perturbations	8.54e-07	0.007961	3.004e-05	0.0002919	10	77	CNN1,SMTN,IGFBP7,IFI6,DKK3,INHBA,NUAK1,NNAT,TAGLN,CDH2
Coexpression Atlas	gudmap_developingLowerUrinaryTract_P1_bladder_J_100_k4	DevelopingLowerUrinaryTract_P1_bladder_J_emap-30374_k-means-cluster#4_top-relative-expression-ranked_100	Gudmap Mouse MOE430.2	8.63e-07	0.003383	6.918e-06	6.123e-05	7	26	ACTA2,ACTG2,CNN1,MYH11,MYLK,TAGLN,NT5E
Coexpression	M39054	MANNO_MIDBRAIN_NEUROTYPES_HRGL2B	C8: Cell Type Signature	8.7e-07	0.00811	3.049e-05	0.0002963	24	439	TTYH1,MCC,RFTN2,CSMD3,FABP5,FHL1,TNC,WNT7A,SESN3,SCUBE2,LIMCH1,IFI6,ATP2B4,AIF1L,DENND2B,ANOS1,NFIB,IFI44L,GPC1,TAF1C,CDCA8,SOX21,EGR2,EPHA3
GO: Biological Process	GO:0001558	regulation of cell growth		8.919e-07	0.005107	6.996e-05	0.0006457	32	571	CDKN2A,MAP2,NDRG3,PICALM,SEMA5B,FHL1,LTBP4,TRIM46,SEMA3F,ISLR2,SFRP1,FN1,TNC,WT1,CRABP2,TAF9B,IGFBP7,DCBLD2,PRSS2,SPOCK1,INHBA,GAS1,PARD6G,DCX,SYT1,HDGFL2,DDR1,RGS4,GSK3B,TGFB2,SEMA3D,GREM1
Coexpression Atlas	gudmap_kidney_P2_CapMes_Crym_1000	kidney_P2_CapMes_Crym_top-relative-expression-ranked_1000	Gudmap Mouse MOE430.2	9.327e-07	0.003656	7.462e-06	6.604e-05	34	637	TPM2,EYA4,RAMP2,PENK,MCAM,MEIS2,FBN2,MEX3A,HOXD11,RAD54B,CAP2,FOXC2,SEMA3F,TNC,WT1,CRABP2,OSR1,LIMCH1,IL17RD,MYLK,GAS2,P4HA3,LAMP5,DCX,NUAK1,CTXN1,DTNA,CNTRL,EDNRA,HMCN1,CDK2AP1,TNFAIP2,CDH2,TPBG
Coexpression Atlas	gudmap_developingLowerUrinaryTract_P1_bladder_B_200_k2	DevelopingLowerUrinaryTract_P1_bladder_B_emap-30374_k-means-cluster#2_top-relative-expression-ranked_200	Gudmap Mouse MOE430.2	9.398e-07	0.003684	7.503e-06	6.641e-05	9	50	ACTA2,ACTG2,MYL9,CNN1,MYH11,PTHLH,TAGLN,NT5E,THBS2
Coexpression	M45037	CARRILLOREIXACH_HEPATOBLASTOMA_VS_NORMAL_HYPOMETHYLATED_AND_UP	C2:CGP: Chemical and Genetic Perturbations	9.567e-07	0.008919	3.34e-05	0.0003246	14	162	MAP4K4,COL4A1,COL6A3,COL12A1,TNC,OLFML2B,NKD1,NUAK1,SULF1,DNMT3A,UACA,TGFB2,THBS2,R3HDM1
Coexpression	M19636	MCBRYAN_PUBERTAL_BREAST_6_7WK_DN	C2:CGP: Chemical and Genetic Perturbations	9.646e-07	0.008992	3.355e-05	0.000326	10	78	ACTA2,ACTG2,UPK3A,SDC1,CNN1,SFRP1,TNC,MYH11,TAGLN,EGR2
Coexpression	M45794	HE_LIM_SUN_FETAL_LUNG_C7_LATE_SCHWANN_CELL	C8: Cell Type Signature	9.698e-07	0.009041	3.361e-05	0.0003266	11	97	MYL9,FST,COL4A1,IGFBP7,LIMCH1,HTRA1,LAMP5,BGN,OLFML2A,NTM,TPBG
GO: Biological Process	GO:0007416	synapse assembly		9.861e-07	0.005647	7.631e-05	0.0007043	20	260	EPHB2,ASIC2,FZD1,SLITRK6,CHODL,TNC,NLGN4Y,WNT7A,SLITRK3,LRRN3,DKK1,PCDHB5,NECTIN1,ARHGEF9,PCDHB10,GSK3B,THBS2,TJP1,CDH2,TPBG
Coexpression	M40249	DESCARTES_FETAL_LUNG_VISCERAL_NEURONS	C8: Cell Type Signature	1.006e-06	0.009377	3.473e-05	0.0003375	16	212	TTYH1,CADM4,TUBB3,TUBB4A,KIAA1549L,FST,MGAT5B,PDZD4,RAB15,FAM131B,B4GALNT1,TUBB2B,DCX,ASTN2,NKAIN1,EPHA3
Coexpression	M39173	MURARO_PANCREAS_DUCTAL_CELL	C8: Cell Type Signature	1.015e-06	0.009458	3.49e-05	0.0003391	47	1276	TPM1,VGLL3,MCAM,PICALM,TUBB3,ARHGAP29,ALDH1A3,AMOTL2,PLS3,SDC1,JCAD,TEAD2,TUBB,ID3,RND3,ARHGDIB,IGFBP7,PDE5A,CCN2,IL17RD,DCBLD2,ATP2B4,H19,ATP5F1C,MYADM,SAMD9,MARCKSL1,SLFN5,OLFML2A,NFIB,RAB6A,WNK2,ZNF704,KRT7,CALD1,DUSP4,LCP1,ZNF503,TGFB2,C1orf198,LMNA,TJP1,PSME3,TNFAIP2,PWWP3B,PHLDB2,TPBG
Coexpression Atlas	Facebase_RNAseq_e8.5_Paraxial Mesoderm_100	FacebaseRNAseq_e8.5_Paraxial Mesoderm_top-relative-expression-ranked_100	FaceBase_RNAseq	1.015e-06	0.003979	8.088e-06	7.159e-05	12	97	ABCA9,SLITRK6,FOXC1,COL6A3,COL8A1,TNC,POSTN,OSR1,P4HA3,NNAT,SENP7,EPHA3
Coexpression	M2143	HOELZEL_NF1_TARGETS_DN	C2:CGP: Chemical and Genetic Perturbations	1.022e-06	0.009525	3.502e-05	0.0003403	12	118	NREP,ADCY1,SLITRK6,FN1,MIAT,GATA3,BGN,ST6GAL2,FBXL7,CCDC3,ADAMTS5,HMCN1
GO: Biological Process	GO:1901888	regulation of cell junction assembly		1.047e-06	0.005996	7.995e-05	0.0007379	20	261	EPHB2,ASIC2,FZD1,SLITRK6,MAP4K4,SFRP1,TNC,WNT7A,SLITRK3,LRRN3,DKK1,LIMCH1,NECTIN1,GSK3B,THBS2,TJP1,GREM1,PHLDB2,TPBG,EPHA3
Coexpression	M45756	HE_LIM_SUN_FETAL_LUNG_C3_LYMPHATIC_ENDOTHELIAL_CELL	C8: Cell Type Signature	1.059e-06	0.009874	3.611e-05	0.0003509	22	382	EPHB2,CTTNBP2,LTBP4,ISLR2,SFRP1,CCDC80,GLIPR2,LIMCH1,PRKG1,SNCG,DKK3,CNTNAP3B,HTRA1,PARD6G,P4HA3,OLFML2A,OLFML1,SGCE,KIF3C,SEMA3D,FRMD6,TPBG
Coexpression	M2456	WANG_MLL_TARGETS	C2:CGP: Chemical and Genetic Perturbations	1.061e-06	0.009893	3.611e-05	0.0003509	19	294	ABCA9,FBN2,EVA1A,FOXC1,FOXC2,SFRP1,CCDC80,POSTN,ARHGDIB,DKK3,ADAM19,GATA3,PTHLH,FBXL7,MAFB,DLX2,SASH1,ZNF503,THBS2
Coexpression	M1129	MCBRYAN_TERMINAL_END_BUD_UP	C2:CGP: Chemical and Genetic Perturbations	1.09e-06	0.01016	3.696e-05	0.0003592	5	12	SDC1,CNN1,SFRP1,MYH11,EGR2
Coexpression	MM997	MARTORIATI_MDM4_TARGETS_FETAL_LIVER_DN	M2:CGP: Chemical and Genetic Perturbations	1.098e-06	0.01023	3.707e-05	0.0003603	27	542	RCBTB2,FZD1,CLCN5,PLN,AGAP3,COL9A1,STARD4,SFSWAP,TNC,POGK,POSTN,CELF1,ZKSCAN1,NRK,BUB1,GPC2,NNAT,PCBP4,DPYSL3,CNTRL,LCP1,LPAR1,ISG20L2,PBX3,CDH2,RBFOX2,EPHA3
Coexpression	M15472	VECCHI_GASTRIC_CANCER_EARLY_DN	C2:CGP: Chemical and Genetic Perturbations	1.106e-06	0.01031	3.722e-05	0.0003617	22	383	FHL1,PLN,CNN1,CNTN1,SFRP1,SOSTDC1,CLDND1,SCUBE2,SNRPN,ARHGAP24,GAS1,SEPTIN6,SULT1E1,RBMS3,ST8SIA4,TSC22D3,DTNA,RGS4,TTLL7,INA,ENTPD3,PWWP3B
Coexpression Atlas	gudmap_kidney_adult_RenCorpuscGlomer_k1_500	kidney_adult_RenCorpuscGlomer_k-means-cluster#1_top-relative-expression-ranked_500	Gudmap Mouse MOE430.2	1.118e-06	0.004383	8.891e-06	7.87e-05	11	81	TRPC4,CCDC80,POSTN,IGFBP7,CCN2,PRKG1,DKK2,GATA3,BGN,NT5E,ADAMTS5
Coexpression	MM681	TSENG_IRS1_TARGETS_DN	M2:CGP: Chemical and Genetic Perturbations	1.123e-06	0.01047	3.766e-05	0.000366	13	141	EPHB6,RAMP2,HLX,COL4A1,COL6A3,CRIP2,LIMCH1,DKK3,GAS2,SGCE,LPAR1,FRMD6,LY6H
Coexpression Atlas	PCBC_ratio_MESO-5_vs_SC_1000	ratio_induced-Mesoderm_vs_StemCell_top-relative-expression-ranked_1000	PCBC	1.129e-06	0.004426	8.959e-06	7.93e-05	45	982	CDKN2A,PDE4D,DACT2,MCAM,MCC,HLX,CSMD3,FBN2,ARHGAP29,AMOTL2,FST,PCDH10,FOXC1,COL4A1,SEMA3F,JCAD,COL8A1,LRP12,COL9A2,COL13A1,FN1,TNC,WT1,ARL4D,DKK1,ARHGAP24,ADAM19,SPOCK1,GATA2,GATA3,PDE10A,PTHLH,OLFML1,TAGLN,ST8SIA4,DTNA,DUSP4,NBPF15,LTBP2,GREM1,LY6E,AADAT,LY6H,CDH2,CDH12
Coexpression Atlas	gudmap_developingLowerUrinaryTract_e13.5_bladder neck-urethr mesench_1000_k3	DevelopingLowerUrinaryTract_e13.5_bladder neck-urethr mesench_emap-3087_k-means-cluster#3_top-relative-expression-ranked_1000	Gudmap Mouse MOE430.2	1.142e-06	0.004477	9.045e-06	8.006e-05	14	135	TUBB3,CNTN1,COL8A1,CRMP1,SPOCK1,C11orf87,NCAM2,DCX,NEFL,SYT11,STMN3,SYT1,ADAMTS5,RGS4
Coexpression	M1576	GERHOLD_ADIPOGENESIS_DN	C2:CGP: Chemical and Genetic Perturbations	1.163e-06	0.01084	3.885e-05	0.0003775	9	62	SDC1,FN1,TUBB,CCN2,GAS1,TUBA1A,SAE1,THBS2,TNFAIP2
Coexpression Atlas	gudmap_kidney_adult_Podocyte_MafB_500	kidney_adult_Podocyte_MafB_top-relative-expression-ranked_500	Gudmap Mouse MOE430.2	1.173e-06	0.004599	9.271e-06	8.206e-05	27	445	PDE4D,CTTNBP2,CADM4,MCC,ADCY1,ABCA9,PLN,FOXC1,FOXC2,PODXL,WT1,APLP1,TAF9B,IGFBP7,CCN2,PRKG1,HTRA1,ARHGAP24,MYLK,SYNC,AIF1L,SULF1,ASTN2,MAFB,KRT7,UACA,TJP1
Coexpression	M39152	GAO_LARGE_INTESTINE_24W_C1_DCLK1POS_PROGENITOR	C8: Cell Type Signature	1.191e-06	0.01111	3.967e-05	0.0003855	11	99	FZD1,COL8A1,SFRP1,CCDC80,SCUBE2,IFI6,HTRA1,GBP1,OLFML1,LPAR1,THBS2
Coexpression	M6315	IWANAGA_CARCINOGENESIS_BY_KRAS_PTEN_DN	C2:CGP: Chemical and Genetic Perturbations	1.215e-06	0.01133	4.031e-05	0.0003917	21	355	TPM1,RAMP2,MAP2,RHOJ,MCAM,PICALM,MEIS2,FHL1,CNN1,COL4A1,AKAP12,GAS1,BGN,FBXL7,DDHD2,ZEB1,CBFA2T3,OPRK1,KATNBL1,GREM1,PSPC1
Coexpression Atlas	Facebase_RNAseq_e10.5_Lateral Nasal Eminence_1000	FacebaseRNAseq_e10.5_Lateral Nasal Eminence_top-relative-expression-ranked_1000	FaceBase_RNAseq	1.225e-06	0.004804	9.665e-06	8.555e-05	45	985	EYA4,NREP,EHD3,FZD1,TBC1D14,SLITRK6,CAP2,MRTFA,FOXC1,PCYT1B,SEMA3F,COL6A3,LRP12,TNC,SESN3,PREPL,POSTN,TAF9B,ISG15,ITPRIP,PDE5A,LIMCH1,DKK2,GATA2,GATA3,P4HA3,C11orf87,LAMP5,KCNMB4,NNAT,GLIPR1,ZNF704,KRT7,DPYSL3,LCP1,TFAP2A,EDNRA,MRPL4,HMCN1,EGR2,EPB41,PHLDB2,SENP7,TPBG,EPHA3
GO: Biological Process	GO:0070848	response to growth factor		1.233e-06	0.007059	9.288e-05	0.0008573	44	942	RAMP2,CADM4,PENK,ACTA2,FAM89B,NREP,MEIS2,FZD1,FBN2,FST,FKBP1A,LTBP4,FOXC1,FOXC2,JCAD,SFRP1,WNT7A,SOSTDC1,SCUBE2,DKK1,RASL11B,CCN2,IL17RD,ATP2B4,DKK3,HTRA1,INHBA,GAS1,GATA3,GDF10,RBMS3,SULF1,WASF1,GPC1,ZEB1,CALD1,TSC22D3,DUSP4,GSK3B,TGFB2,CCBE1,LTBP2,GREM1,SMAD1
GO: Molecular Function	GO:0008092	cytoskeletal protein binding		1.248e-06	0.001065	0.0005324	0.003901	51	1135	TPM1,TPM2,CTTNBP2,MAP2,KATNAL1,REEP2,PICALM,MYL9,ANLN,MAP4K4,KIF17,HSPA2,PLS3,CNN1,CAP2,MRTFA,TRIM46,BIN1,RAE1,DPYSL4,CDC42EP3,CRMP1,SMTN,LIMCH1,SNCG,MYH11,MYLK,GAS2,GBP1,MARCKSL1,AIF1L,DCX,SYT11,STMN3,KIF3C,TAGLN,WASF1,RAB6A,CACNA1C,DPYSL3,CALD1,UACA,CNTRL,STMN1,ACTR3B,LCP1,GSK3B,TTLL7,KATNBL1,VASH2,EPB41
Coexpression Atlas	gudmap_kidney_adult_RenalCapsule_k4_1000	kidney_adult_RenalCapsule_k-means-cluster#4_top-relative-expression-ranked_1000	Gudmap Mouse MOE430.2	1.249e-06	0.004896	9.831e-06	8.701e-05	14	136	ABCA9,CCDC80,CDC42EP3,POSTN,IGFBP7,PRKG1,DKK2,HTRA1,MYLK,BGN,RBMS3,CALD1,ADAMTS5,TJP1
GO: Biological Process	GO:0060560	developmental growth involved in morphogenesis		1.274e-06	0.007294	9.473e-05	0.0008744	26	415	MAP2,PICALM,SEMA5B,TRIM46,SEMA3F,ISLR2,COL6A3,SFRP1,FN1,TNC,CRABP2,AKAP12,POSTN,NKD1,PRKG1,PARD6G,DCX,PTHLH,SYT1,WASF1,DDR1,GSK3B,EDNRA,SEMA3D,CDH2,TPBG
Coexpression Atlas	Facebase_RNAseq_e10.5_Neural Epithelium Overlying Lateral Eminence_2500_K3	FacebaseRNAseq_e10.5_Neural Epithelium Overlying Lateral Eminence_top-relative-expression-ranked_2500_k-means-cluster#3	FaceBase_RNAseq	1.278e-06	0.00501	1.004e-05	8.886e-05	27	447	TTYH1,MAP2,TUBB3,CSRNP3,CPT1C,PCDH10,MGAT5B,IGLON5,COL8A1,SEPTIN5,DPYSL4,POU3F1,TAF9B,NSG1,BRINP1,DCX,TUBA1A,SYT11,ASTN2,SGCE,DLX2,WNK2,SHANK1,DTNA,TAMALIN,TOX2,SENP7
Coexpression	M41097	CAO_BLOOD_FLUZONE_AGE_05_14YO_CORRELATED_WITH_H3N1_HI_TITER_1DY_POSITIVE	C7:VAX: HIPC Vaccine Response	1.294e-06	0.01206	4.278e-05	0.0004157	4	6	IFIT1,ISG15,GBP1,IFI44L
Coexpression Atlas	gudmap_developingKidney_e15.5_Podocyte cells_100_k3	DevelopingKidney_e15.5_Podocyte cells_emap-27915_k-means-cluster#3_top-relative-expression-ranked_100	Gudmap Mouse MOE430.2	1.327e-06	0.005202	1.04e-05	9.209e-05	6	18	EYA4,ACTG2,CNTN1,COL9A1,MYH11,TBX18
GO: Biological Process	GO:0006935	chemotaxis		1.342e-06	0.007681	9.848e-05	0.000909	41	851	EPHB2,EPHB6,PDE4D,E2F7,TENM2,ADCY1,TUBB3,SEMA5B,PLS3,CNTN1,FOXC1,FOXC2,SEMA3F,ISLR2,COL6A3,FN1,CHODL,TNC,WT1,DPYSL4,CCDC80,CRMP1,GAS1,GATA3,TUBB2B,ANOS1,NFIB,NECTIN1,NOVA1,NOVA2,DPYSL3,LPAR1,EDNRA,TGFB2,PLEKHG4B,SEMA3D,EGR2,GREM1,CDH2,TPBG,EPHA3
Coexpression	MM3782	TABULA_MURIS_SENIS_MESENTERIC_ADIPOSE_TISSUE_MESENCHYMAL_STEM_CELL_OF_ADIPOSE_AGEING	M8: Cell Type Signature	1.349e-06	0.01258	4.445e-05	0.0004319	31	685	IGSF8,TPM2,RAMP2,RHOJ,FAM89B,PKM,MMP11,FST,UBE2E3,COL8A1,BIN1,SFRP1,TUBB,WT1,CRIP2,ARL4D,MANBAL,IGFBP7,NSG1,OSR1,RBM26,MAFB,DDHD2,CALD1,DTX3,UBXN1,TAMALIN,GSK3B,ZNF503,LMNA,TNFAIP2
Coexpression Atlas	gudmap_developingGonad_P2_epididymis_200	DevelopingGonad_P2_epididymis_emap-30199_top-relative-expression-ranked_200	Gudmap Mouse MOE430.2	1.358e-06	0.005325	1.061e-05	9.389e-05	15	157	PENK,MEIS2,CNN1,SFSWAP,PRKG1,MYH11,INHBA,SULT1E1,NFIB,NRK,TAGLN,DPYSL3,GSK3B,EDNRA,LTBP2
Coexpression Atlas	gudmap_developingLowerUrinaryTract_e14.5_ Genital tubercle_200	DevelopingLowerUrinaryTract_e14.5_ Genital tubercle_emap-6706_top-relative-expression-ranked_200	Gudmap Mouse MOE430.2	1.358e-06	0.005325	1.061e-05	9.389e-05	15	157	VGLL3,TENM2,SLITRK6,PCDH10,WNT7A,SOSTDC1,DKK1,LIMCH1,DKK3,DKK2,SPOCK1,ST6GAL2,NTM,DLX2,TFAP2A
Coexpression	M9128	KIM_WT1_TARGETS_UP	C2:CGP: Chemical and Genetic Perturbations	1.369e-06	0.01276	4.492e-05	0.0004365	16	217	ARHGAP29,FOXC1,WT1,AKAP12,RND3,RAB15,INHBA,PDE10A,PTHLH,GLIPR1,ZEB1,CALD1,LPAR1,RGS4,CDH2,TPBG
Coexpression Atlas	gudmap_developingLowerUrinaryTract_e14.5_ Genital tubercle M_1000_k3	DevelopingLowerUrinaryTract_e14.5_ Genital tubercle M_emap-6706_k-means-cluster#3_top-relative-expression-ranked_1000	Gudmap Mouse MOE430.2	1.385e-06	0.005429	1.077e-05	9.534e-05	13	118	SLITRK6,PCDH10,SOSTDC1,DKK1,LIMCH1,DKK2,INHBA,NFIB,NTM,DLX2,TFAP2A,EDNRA,FRMD6
Coexpression Atlas	PCBC_ratio_ECTO blastocyst_vs_ECTO fibroblast_cfr-2X-p05	ECTO blastocyst_vs_ECTO fibroblast-Confounder_removed-fold2.0_adjp0.05	PCBC_AltAnalyze	1.385e-06	0.005429	1.077e-05	9.534e-05	13	118	ACTA2,PCDH10,CNN1,FN1,LRRN3,DKK1,RASL11B,SPOCK1,ST6GAL2,ZNF558,MAFB,TAGLN,EDNRA
Coexpression Atlas	PCBC_ratio_MESO-15_from-episomal_vs_MESO-15_from-ESC_cfr-2X-p05	Mesoderm Day 15-method_episomal_vs_Mesoderm Day 15-method_NA-Confounder_removed-fold2.0_adjp0.05	PCBC_AltAnalyze	1.412e-06	0.005536	1.094e-05	9.685e-05	12	100	FST,COL6A3,COL13A1,PODXL,POSTN,H19,PRSS2,GAS1,SULF1,KRT7,RGS4,ZNF503
Coexpression Atlas	PCBC_ratio_MESO-15_from-OSK-L-l-p53KD_vs_MESO-15_from-ESC_cfr-2X-p05	Mesoderm Day 15-reprogram_OSK-L-l-p53KD_vs_Mesoderm Day 15-reprogram_NA-Confounder_removed-fold2.0_adjp0.05	PCBC_AltAnalyze	1.412e-06	0.005536	1.094e-05	9.685e-05	12	100	FST,COL6A3,COL13A1,PODXL,POSTN,H19,PRSS2,GAS1,SULF1,KRT7,RGS4,ZNF503
GO: Biological Process	GO:0042330	taxis		1.423e-06	0.008149	0.0001032	0.0009521	41	853	EPHB2,EPHB6,PDE4D,E2F7,TENM2,ADCY1,TUBB3,SEMA5B,PLS3,CNTN1,FOXC1,FOXC2,SEMA3F,ISLR2,COL6A3,FN1,CHODL,TNC,WT1,DPYSL4,CCDC80,CRMP1,GAS1,GATA3,TUBB2B,ANOS1,NFIB,NECTIN1,NOVA1,NOVA2,DPYSL3,LPAR1,EDNRA,TGFB2,PLEKHG4B,SEMA3D,EGR2,GREM1,CDH2,TPBG,EPHA3
Coexpression Atlas	gudmap_developingLowerUrinaryTract_e14.5_ bladder_100	DevelopingLowerUrinaryTract_e14.5_ bladder_emap-30872_top-relative-expression-ranked_100	Gudmap Mouse MOE430.2	1.433e-06	0.005618	1.108e-05	9.808e-05	11	83	ACTG2,UPK3A,SLITRK6,PDE5A,MYH11,GBP1,C11orf87,NRK,ACTR3B,MSRB3,RBFOX2
GO: Biological Process	GO:0030855	epithelial cell differentiation		1.457e-06	0.00834	0.0001042	0.0009622	47	1044	CDKN2A,EYA4,PDE4D,ACTA2,DACT2,E2F7,FZD1,FBN2,ANLN,UPK3A,SLITRK6,FST,SDC1,FOXC1,FOXC2,COL4A1,FN1,PODXL,WNT7A,TUBB,WT1,ID3,SOSTDC1,POU3F1,CELF1,OSR1,MYCL,MYADM,MYH11,GATA2,GATA3,PTHLH,NFIB,MAFB,KAZN,TAGLN,TMEM231,KRT7,ZEB1,TFAP2A,GSK3B,EDNRA,TGFB2,FRMD6,TJP1,GREM1,CDH2
Coexpression Atlas	gudmap_developingLowerUrinaryTract_P1_bladder_B_100_k3	DevelopingLowerUrinaryTract_P1_bladder_B_emap-30374_k-means-cluster#3_top-relative-expression-ranked_100	Gudmap Mouse MOE430.2	1.497e-06	0.00587	1.153e-05	0.0001021	7	28	ACTA2,ACTG2,MYL9,CNN1,MYH11,TAGLN,NT5E
Coexpression Atlas	gudmap_kidney_P0_JuxtaGlom_Ren1_k3_100	kidney_P0_JuxtaGlom_Ren1_k-means-cluster#3_top-relative-expression-ranked_100	Gudmap Mouse MOE430.2	1.497e-06	0.00587	1.153e-05	0.0001021	7	28	ACTA2,COL12A1,RGS5,IGFBP7,PRKG1,MYH11,KCNMB1
Coexpression	M13479	TAKEDA_TARGETS_OF_NUP98_HOXA9_FUSION_10D_UP	C2:CGP: Chemical and Genetic Perturbations	1.515e-06	0.01413	4.956e-05	0.0004816	15	193	FN1,SP110,IFIT1,CDC42EP3,ISG15,IFI6,SAMD9,SPOCK1,GBP1,LAMP5,IFI44L,ZEB1,DUSP4,ZNF503,LY6E
Coexpression	MM671	GERHOLD_ADIPOGENESIS_DN	M2:CGP: Chemical and Genetic Perturbations	1.531e-06	0.01427	4.99e-05	0.0004849	9	64	SDC1,FN1,TUBB,CCN2,GAS1,TUBA1A,SAE1,THBS2,TNFAIP2
Coexpression Atlas	gudmap_kidney_P0_CapMes_Crym_500	kidney_P0_CapMes_Crym_top-relative-expression-ranked_500	Gudmap Mouse MOE430.2	1.535e-06	0.006016	1.177e-05	0.0001042	21	295	TPM2,EYA4,RAMP2,PENK,MEIS2,FBN2,HOXD11,CAP2,FOXC1,FOXC2,TNC,CRABP2,MOXD1,OSR1,IL17RD,LAMP5,DCX,DTNA,EDNRA,HMCN1,CDH2
Coexpression Atlas	Facebase_RNAseq_e10.5_Olfactory Pit_2500_K1	FacebaseRNAseq_e10.5_Olfactory Pit_top-relative-expression-ranked_2500_k-means-cluster#1	FaceBase_RNAseq	1.535e-06	0.006016	1.177e-05	0.0001042	21	295	EPHB2,TUBB4A,CPT1C,LTBP4,SFRP1,APLP1,CCDC80,POSTN,MANBAL,MYCL,MYADM,HTRA1,OLFML2A,CYRIA,NECTIN1,SHANK1,PIANP,SOX21,INA,TLE4,CDH2
Coexpression	M16123	EBAUER_MYOGENIC_TARGETS_OF_PAX3_FOXO1_FUSION	C2:CGP: Chemical and Genetic Perturbations	1.561e-06	0.01455	5.054e-05	0.0004911	8	48	TPM1,ACTA2,FHL1,COL6A3,BIN1,MRAS,SGCD,TAGLN
Coexpression	MM409	HEVNER_SUBVENTRICULAR_ZONE_AND_UP_NEURON_FATE_COMMITTED_CELLS	M2:CGP: Chemical and Genetic Perturbations	1.561e-06	0.01455	5.054e-05	0.0004911	8	48	TUBB3,AGAP3,CRMP1,WDR47,PDE10A,DCX,GPC2,NNAT
Coexpression Atlas	gudmap_developingGonad_e12.5_ovary_1000	DevelopingGonad_e12.5_ovary_emap-28876_top-relative-expression-ranked_1000	Gudmap Mouse MOE430.2	1.571e-06	0.006159	1.203e-05	0.0001065	39	804	TPM1,HMMR,MEIS2,CNOT6,CSRNP3,ARHGAP29,FST,MEX3B,SFRP1,STARD4,SFSWAP,RGS5,PODXL,WT1,ZNF43,SCMH1,GIGYF2,PRKG1,DOCK11,RBM26,AIF1L,PDE10A,NEFL,ST6GAL2,SULF1,NFIB,NRK,SGCE,DNMT3A,CALD1,PLXDC1,GSK3B,EDNRA,ZNF503,KATNBL1,PSME3,R3HDM1,CDH2,SENP7
Coexpression	M41018	NAKAYA_PLASMACYTOID_DENDRITIC_CELL_FLUMIST_AGE_18_50YO_7DY_DN	C7:VAX: HIPC Vaccine Response	1.6e-06	0.01492	5.161e-05	0.0005015	37	909	CDKN2A,SPNS1,EYA4,PDE4D,CADM4,UBE2H,LTBP4,SDC1,RBM38,TOM1L2,SEMA3F,LMF1,FN1,DPYSL4,APLP1,CDC42EP3,SMTN,NSG1,LIMCH1,SNRPN,ADAM19,SAMD9,GAS1,GATA2,GBP1,BRINP1,BGN,DTNA,CAMK2G,STMN1,RGS4,SLC7A8,LMNA,TLE4,TLL2,VASH2,TNFAIP2
Coexpression	M39259	MENON_FETAL_KIDNEY_9_ENDOTHELIAL_CELLS	C8: Cell Type Signature	1.608e-06	0.01499	5.165e-05	0.0005019	11	102	RAMP2,MEIS2,EHD3,ARHGAP29,MAP4K4,FKBP1A,COL4A1,FN1,CRIP2,H19,UACA
Coexpression	M289	OISHI_CHOLANGIOMA_STEM_CELL_LIKE_DN	C2:CGP: Chemical and Genetic Perturbations	1.612e-06	0.01503	5.165e-05	0.0005019	18	274	TPM2,ACTA2,MYL9,LTBP4,MOXD1,DKK1,RASL11B,CCN2,DKK3,GAS1,MARCKSL1,BGN,SULT1E1,SGCE,KCNMB4,TAGLN,NOVA2,THBS2
Coexpression Atlas	PCBC_ratio_MESO-5 blastocyst_vs_MESO-5 amniotic fluid MSC_cfr-2X-p05	MESO-5 blastocyst_vs_MESO-5 amniotic fluid MSC-Confounder_removed-fold2.0_adjp0.05	PCBC_AltAnalyze	1.613e-06	0.006322	1.232e-05	0.0001091	31	565	DACT2,MCC,SEMA5B,PKM,ALDH1A3,FST,PODXL,NLRP2,CRMP1,ARL4D,ISG15,GLIPR2,RASL11B,MYADM,ADAM19,SPOCK1,PDE10A,DENND2B,SEPTIN6,ST6GAL2,ANOS1,NUAK1,ZNF558,GPC2,ST8SIA4,PCBP4,DTNA,DUSP4,EDNRA,SLC7A5,PHLDB2
Coexpression Atlas	Facebase_RNAseq_e10.5_Neural Epithelium Overlying Medial Eminence_1000_K4	FacebaseRNAseq_e10.5_Neural Epithelium Overlying Medial Eminence_top-relative-expression-ranked_1000_k-means-cluster#4	FaceBase_RNAseq	1.66e-06	0.006505	1.266e-05	0.000112	18	225	TENM2,SEMA5B,PCDH10,WNT7A,DPYSL4,CCP110,TUBB2B,DCX,SYT11,NOVA1,DDR1,DPYSL3,ZEB1,MAMLD1,SOX21,GPR137C,PAK3,CDH2
Coexpression	M40222	DESCARTES_FETAL_KIDNEY_STROMAL_CELLS	C8: Cell Type Signature	1.667e-06	0.01554	5.322e-05	0.0005172	13	146	CPA4,ACTG2,ISLR2,COL12A1,OLFML2B,POSTN,OSR1,DKK2,SULF1,NRK,THBS2,LTBP2,GREM1
GO: Biological Process	GO:0060562	epithelial tube morphogenesis		1.672e-06	0.009574	0.0001182	0.001091	32	588	MEIS2,FZD1,HOXD11,FST,FOXC2,COL4A1,TEAD2,SFRP1,FN1,TNC,PODXL,WT1,SOSTDC1,STIL,NKD1,IGFBP7,OSR1,CTNS,GATA3,PARD6G,MARCKSL1,PTHLH,CACNA1C,DDR1,CALD1,CAMK2G,TFAP2A,GSK3B,EDNRA,TGFB2,IFT52,GREM1
GO: Biological Process	GO:0072001	renal system development		1.737e-06	0.009949	0.0001213	0.00112	30	532	ACTA2,DACT2,HOXD11,ANLN,UPK3A,SDC1,FOXC1,FOXC2,COL4A1,SFRP1,PODXL,WT1,ID3,OSR1,CTNS,SERPINB7,DCHS2,GATA3,PARD6G,SULF1,MAFB,CACNA1C,CAMK2G,CNTRL,TFAP2A,EDNRA,TGFB2,TBX18,GREM1,SMAD1
Coexpression	MM995	MCBRYAN_TERMINAL_END_BUD_UP	M2:CGP: Chemical and Genetic Perturbations	1.747e-06	0.01628	5.557e-05	0.00054	5	13	SDC1,CNN1,SFRP1,MYH11,EGR2
GO: Biological Process	GO:2000026	regulation of multicellular organismal development		1.764e-06	0.0101	0.0001217	0.001123	73	1946	EPHB2,CDKN2A,RAMP2,MAP2,RHOJ,ASIC2,HLX,PICALM,MEIS2,FBN2,SEMA5B,HOXD11,PKM,SLITRK6,FST,FOXC1,FOXC2,TRIM46,SEMA3F,JCAD,ISLR2,BIN1,SFRP1,FN1,CHODL,TNC,WNT7A,WT1,SLITRK3,CRABP2,LRRN3,DKK1,ISG15,DLL3,OSR1,CCN2,ATP2B4,MYCL,MYH11,INHBA,GATA2,GATA3,BRINP1,DCX,PTHLH,NEFL,CYRIA,RBMS3,SULF1,MAFB,DLX2,ZEB1,SASH1,TFAP2A,RGS4,GSK3B,TGFB2,TBX18,SEMA3D,THBS2,EGR2,TJP1,CCBE1,VASH2,PAK3,SLC7A5,GREM1,UBASH3B,CDH2,…
Coexpression	M2783	MEL18_DN.V1_DN	C6: Oncogenic Signature	1.801e-06	0.01678	5.709e-05	0.0005548	13	147	EYA4,ASIC2,PENK,PLN,CRABP2,IFIT1,PDE5A,IFI6,GAS2,SULF1,TFAP2A,LY6E,EPHA3
Coexpression Atlas	Facebase_RNAseq_e8.5_Non-Floor Plate Neural Epithelium_1000_K3	FacebaseRNAseq_e8.5_Non-Floor Plate Neural Epithelium_top-relative-expression-ranked_1000_k-means-cluster#3	FaceBase_RNAseq	1.839e-06	0.007207	1.399e-05	0.0001239	16	182	REEP2,TUBB4A,PKM,PLS3,RGS5,PODXL,CCDC80,POSTN,SCUBE2,DKK1,SNRPN,HTRA1,NECTIN1,ZNF503,INA,GREM1
Coexpression Atlas	GSM476675_500	gamma delta T cells, Tgd.Th, TCRd+ CD3e+, Thymus, avg-3	Immgen.org, GSE15907	1.844e-06	0.007228	1.401e-05	0.000124	23	349	EPHB2,PDE4D,RCBTB2,MCM5,HMMR,EHD3,MEX3A,ANLN,MEX3B,CAP2,ID3,STIL,UHRF1,GATA3,MARCKSL1,MELK,BUB1,NT5E,DUSP4,STMN1,CDCA8,TOX2,ARHGAP19
Coexpression	MM1043	IWANAGA_CARCINOGENESIS_BY_KRAS_PTEN_DN	M2:CGP: Chemical and Genetic Perturbations	1.89e-06	0.01762	5.966e-05	0.0005798	21	365	TPM1,RAMP2,MAP2,RHOJ,MCAM,PICALM,MEIS2,FHL1,CNN1,COL4A1,AKAP12,GAS1,BGN,FBXL7,DDHD2,ZEB1,CBFA2T3,OPRK1,KATNBL1,GREM1,PSPC1
Coexpression	M6444	NUYTTEN_NIPP1_TARGETS_UP	C2:CGP: Chemical and Genetic Perturbations	1.894e-06	0.01766	5.966e-05	0.0005798	33	768	ACTG2,KATNAL1,NREP,TRIM22,ZNF550,CLCN5,MARCHF4,PODXL,CELF1,ISG15,CCN2,IFI6,SERPINB7,SAMD9,INHBA,RBM26,P4HA3,LAMP5,SLFN5,ZC4H2,RBMS3,IFI44L,CALD1,DTX3,RGS4,SDAD1,SEMA3D,EGR2,TJP1,TLE4,DHRS2,PBX3,EPHA3
Coexpression Atlas	gudmap_developingLowerUrinaryTract_e14.5_ bladder_100_k1	DevelopingLowerUrinaryTract_e14.5_ bladder_emap-30872_k-means-cluster#1_top-relative-expression-ranked_100	Gudmap Mouse MOE430.2	1.905e-06	0.007467	1.444e-05	0.0001278	6	19	ACTG2,UPK3A,MYH11,GBP1,ACTR3B,MSRB3
GO: Cellular Component	GO:0036477	somatodendritic compartment		1.916e-06	0.001226	0.0001533	0.001079	52	1229	EPHB2,EPHB6,CTTNBP2,MAP2,ASIC2,PENK,CNTNAP3,MCAM,TENM2,ADCY2,PICALM,TUBB3,TUBB4A,CPT1C,KIF17,BEGAIN,BIN1,NLGN4Y,AKAP12,CRMP1,WDR47,NSG1,GIGYF2,SNCG,CNTNAP3B,LAMP5,PDE10A,ZC4H2,DCX,SYT11,NECTIN1,ASTN2,SGCE,KIF3C,GRIN3A,WASF1,SHANK1,GPC1,CACNA1C,CALD1,PLXDC1,UBXN1,LPAR1,RGS12,GSK3B,NCS1,OPRK1,TTLL7,TGFB2,IFT52,TPBG,EPHA3
Coexpression	MM1076	WANG_MLL_TARGETS	M2:CGP: Chemical and Genetic Perturbations	1.922e-06	0.01792	6.033e-05	0.0005862	19	306	ABCA9,FBN2,EVA1A,FOXC1,FOXC2,SFRP1,CCDC80,POSTN,ARHGDIB,DKK3,ADAM19,GATA3,PTHLH,FBXL7,MAFB,DLX2,SASH1,ZNF503,THBS2
Coexpression	M45682	HE_LIM_SUN_FETAL_LUNG_C0_MYOFIBROBLAST_2_CELL	C8: Cell Type Signature	1.951e-06	0.01819	6.104e-05	0.0005931	11	104	EYA4,ACTG2,JCAD,COL12A1,NKD1,MYH11,HTRA1,COL24A1,SYT1,ZEB1,LTBP2
Coexpression	M39296	DURANTE_ADULT_OLFACTORY_NEUROEPITHELIUM_GLOBOSE_BASAL_CELLS	C8: Cell Type Signature	1.969e-06	0.01836	6.139e-05	0.0005966	7	35	MEX3A,TUBB,TUBB2B,MARCKSL1,TUBA1A,PCBP4,STMN1
Coexpression Atlas	DevelopingLowerUrinaryTract_e14.5_ urethra_emap-30902_k3_500	DevelopingLowerUrinaryTract_e14.5_ urethra_emap-30902_k-means-cluster#3_top-relative-expression-ranked_500	Gudmap Mouse MOE430.2	2.01e-06	0.007879	1.521e-05	0.0001346	8	41	ACTA2,ACTG2,TENM2,CNN1,CAP2,PDE5A,MYH11,MYLK
Coexpression Atlas	DevelopingLowerUrinaryTract_e14.5_ urogenital sinus_emap-6689_k4_500	DevelopingLowerUrinaryTract_e14.5_ urogenital sinus_emap-6689_k-means-cluster#4_top-relative-expression-ranked_500	Gudmap Mouse MOE430.2	2.052e-06	0.008042	1.55e-05	0.0001371	11	86	EYA4,CSRNP3,SLITRK6,PCDH10,COL8A1,DKK2,INHBA,ST6GAL2,SULF1,ST8SIA4,EPHA3
Coexpression	M41709	FAN_OVARY_CL7_ANGEIOGENIC_ENDOTHELIAL_CELL	C8: Cell Type Signature	2.072e-06	0.01932	6.39e-05	0.000621	17	251	RAMP2,ARHGAP29,FKBP1A,HSPA2,PLS3,FN1,ID3,CRIP2,IGFBP7,ISG15,CYYR1,CCN2,IFI6,NFIB,IFI44L,TSC22D3,LY6E
Coexpression	M2310	DANG_REGULATED_BY_MYC_DN	C2:CGP: Chemical and Genetic Perturbations	2.072e-06	0.01932	6.39e-05	0.000621	17	251	TPM1,MCC,NREP,FZD1,PLS3,COL6A3,FN1,ID3,IFIT1,AKAP12,POSTN,CCN2,INHBA,GAS1,GPC1,CALD1,CDH2
Coexpression	M9893	RODWELL_AGING_KIDNEY_NO_BLOOD_UP	C2:CGP: Chemical and Genetic Perturbations	2.074e-06	0.01934	6.39e-05	0.000621	16	224	TPM1,MCAM,MMP11,FHL1,COL6A3,MRAS,FN1,TNC,MOXD1,DKK3,INHBA,NUAK1,RBMS3,TAGLN,VASH2,TPBG
Coexpression	M5183	GSE360_DC_VS_MAC_T_GONDII_UP	C7:IMMUNESIGDB: ImmuneSigDB	2.086e-06	0.01944	6.39e-05	0.000621	15	198	TPM1,TRAF5,PENK,ACTG2,REEP2,COL9A2,FN1,SOSTDC1,CCN2,B4GALNT1,ADAM19,TUBA1A,ST8SIA4,TNFAIP2,DHRS2
Coexpression	M5208	GSE360_L_MAJOR_VS_T_GONDII_DC_DN	C7:IMMUNESIGDB: ImmuneSigDB	2.086e-06	0.01944	6.39e-05	0.000621	15	198	ASIC2,UPK3A,MMP11,COL8A1,RAE1,FAM131B,MYH11,B4GALNT1,OLFML2A,TMCC2,SGCE,NOVA2,CACNA1C,THBS2,INA
Coexpression	M13944	GOZGIT_ESR1_TARGETS_UP	C2:CGP: Chemical and Genetic Perturbations	2.096e-06	0.01954	6.39e-05	0.000621	13	149	PROM2,FHL1,COL12A1,CDC42EP3,LIMCH1,GAS1,GATA2,SEPTIN6,CYRIA,SGCE,NT5E,TFAP2A,DHRS2
Coexpression	M2385	KATSANOU_ELAVL1_TARGETS_UP	C2:CGP: Chemical and Genetic Perturbations	2.098e-06	0.01955	6.39e-05	0.000621	14	173	ALDH1A3,FOXC1,RGS5,OLFML2B,PDE5A,SNCG,MYH11,FJX1,AIF1L,FBXL7,NRK,KCNMB1,ADAMTS5,HMCN1
Coexpression	M12924	SASSON_RESPONSE_TO_FORSKOLIN_DN	C2:CGP: Chemical and Genetic Perturbations	2.154e-06	0.02008	6.502e-05	0.0006318	10	85	TPM2,ACTA2,ACTG2,MAP4K4,CAP2,RGS5,AKAP12,GBP1,TUBA1A,RGS4
Coexpression	M40304	DESCARTES_FETAL_STOMACH_STROMAL_CELLS	C8: Cell Type Signature	2.155e-06	0.02009	6.502e-05	0.0006318	8	50	ACTA2,ACTG2,CNN1,COL6A3,MYH11,INHBA,NRK,TAGLN
Coexpression	M1259	SASAI_RESISTANCE_TO_NEOPLASTIC_TRANSFROMATION	C2:CGP: Chemical and Genetic Perturbations	2.155e-06	0.02009	6.502e-05	0.0006318	8	50	AMOTL2,MMP11,ID3,CCN2,BGN,TAGLN,DDR1,LTBP2
Coexpression Atlas	gudmap_kidney_P1_CapMes_Crym_500	kidney_P1_CapMes_Crym_top-relative-expression-ranked_500	Gudmap Mouse MOE430.2	2.191e-06	0.008588	1.651e-05	0.0001462	20	277	TPM2,EYA4,RAMP2,PENK,MEIS2,FBN2,MEX3A,HOXD11,FOXC2,TNC,WT1,CRABP2,OSR1,IL17RD,DCX,DTNA,CNTRL,EDNRA,HMCN1,CDH2
Coexpression	M78	EBAUER_TARGETS_OF_PAX3_FOXO1_FUSION_UP	C2:CGP: Chemical and Genetic Perturbations	2.221e-06	0.0207	6.677e-05	0.0006489	15	199	TPM1,TRAF5,ACTA2,FHL1,COL6A3,BIN1,MRAS,CHODL,SFSWAP,SGCD,ISG15,FAM131B,DCX,TAGLN,TNFAIP2
Coexpression	M1610	CUI_TCF21_TARGETS_2_UP	C2:CGP: Chemical and Genetic Perturbations	2.298e-06	0.02142	6.863e-05	0.0006669	23	432	IGSF8,PENK,MCM5,HSPBP1,HMMR,ADCY2,SBK1,MEX3A,MMP11,TEAD2,FN1,CCDC80,POSTN,NKD1,UHRF1,TMEM231,PCBP4,STMN1,CDCA8,EDNRA,CDK2AP1,VASH2,SERTAD4
Coexpression Atlas	Facebase_RNAseq_e8.5_Non-Floor Plate Neural Epithelium_500	FacebaseRNAseq_e8.5_Non-Floor Plate Neural Epithelium_top-relative-expression-ranked_500	FaceBase_RNAseq	2.302e-06	0.009022	1.732e-05	0.0001533	28	489	REEP2,TUBB3,TUBB4A,PKM,FHL1,PLS3,RBM38,PODXL,POU3F1,CRMP1,SCUBE2,DKK1,SNRPN,AIF1L,SYT11,NECTIN1,NNAT,NOVA1,GLIPR1,DTNA,ZNF503,SOX21,INA,PAK3,GREM1,TOX2,CDH2,SENP7
Coexpression Atlas	gudmap_dev gonad_e12.5_F_gudmap_devVasOvary_Flk_1000	dev gonad_e12.5_F_DevVasOvary_Flk_top-relative-expression-ranked_1000	Gudmap Mouse ST 1.0	2.313e-06	0.009067	1.737e-05	0.0001537	39	817	PDE4D,RAMP2,RHOJ,MCAM,HLX,RFTN2,ARHGAP31,ARHGAP29,MAP4K4,FOXC1,COL4A1,STARD4,PODXL,SP110,CDC42EP3,CRIP2,CRMP1,SMTN,ARHGDIB,CYYR1,LIMCH1,SNCG,H19,ADAM19,DOCK11,SLFN5,FBXL7,CCDC3,ARHGEF9,ST8SIA4,DPYSL3,ZEB1,SASH1,UACA,LCP1,MSRB3,HMCN1,TJP1,PLEKHO1
GO: Biological Process	GO:0090090	negative regulation of canonical Wnt signaling pathway		2.338e-06	0.01339	0.0001594	0.001471	15	162	MCC,FZD1,SFRP1,SOSTDC1,NKD1,DKK1,DKK3,DKK2,RBMS3,GSK3B,TBX18,TLE4,GREM1,CDH2,TPBG
Coexpression	M9685	GSE43955_1H_VS_60H_ACT_CD4_TCELL_WITH_TGFB_IL6_DN	C7:IMMUNESIGDB: ImmuneSigDB	2.363e-06	0.02203	6.863e-05	0.0006669	15	200	TRAF5,AMOTL2,PLS3,FN1,RGS5,ARL4D,POSTN,NSG1,CCN2,DKK2,SYT1,FRMD6,EGR2,LY6E,RBFOX2
Coexpression	M9675	GSE43955_1H_VS_10H_ACT_CD4_TCELL_WITH_TGFB_IL6_DN	C7:IMMUNESIGDB: ImmuneSigDB	2.363e-06	0.02203	6.863e-05	0.0006669	15	200	HLX,PLS3,FN1,CRABP2,CCN2,DKK3,H19,FJX1,BGN,TFAP2A,SLC7A8,FRMD6,ZNF532,LTBP2,LY6E
Coexpression	M9597	GSE42021_CD24INT_VS_CD24LOW_TCONV_THYMUS_DN	C7:IMMUNESIGDB: ImmuneSigDB	2.363e-06	0.02203	6.863e-05	0.0006669	15	200	TRIM22,ID3,SP110,IFIT1,CDC42EP3,ISG15,CCN2,IFI6,ATP2B4,SAMD9,GATA3,NUAK1,IFI44L,LPAR1,LMNA
Coexpression	M8527	GSE32164_RESTING_DIFFERENTIATED_VS_ALTERNATIVELY_ACT_M2_MACROPHAGE_UP	C7:IMMUNESIGDB: ImmuneSigDB	2.363e-06	0.02203	6.863e-05	0.0006669	15	200	CDKN2A,TRPC4,TENM2,FABP5,ANLN,MAP4K4,SDC1,COL4A1,TUBB,ID3,IGFBP7,UHRF1,TUBA1A,STMN1,CDCA8
Coexpression	M3929	GSE17721_LPS_VS_PAM3CSK4_16H_BMDC_DN	C7:IMMUNESIGDB: ImmuneSigDB	2.363e-06	0.02203	6.863e-05	0.0006669	15	200	HLX,CLCN5,ARHGAP31,FN1,ID3,DLL3,MYADM,SEPTIN6,KIF3C,DDHD2,GLIPR1,SLC12A6,ZNF704,STMN1,RBFOX2
Coexpression	M7335	GSE19888_CTRL_VS_TCELL_MEMBRANES_ACT_MAST_CELL_PRETREAT_A3R_INH_UP	C7:IMMUNESIGDB: ImmuneSigDB	2.363e-06	0.02203	6.863e-05	0.0006669	15	200	EYA4,RFTN2,ABCA9,UBE2H,PGAP1,ALDH1A3,FN1,CHODL,RGS5,CDC42EP3,AKAP12,ATP5F1C,GDF10,NECTIN1,ARHGAP19
Coexpression	M6480	GSE4748_CTRL_VS_LPS_STIM_DC_3H_UP	C7:IMMUNESIGDB: ImmuneSigDB	2.363e-06	0.02203	6.863e-05	0.0006669	15	200	RHOJ,PENK,AMOTL2,AKAP12,RND3,POSTN,CCN2,DKK3,INHBA,GAS1,DPYSL3,ZFP90,FRMD6,ZNF532,EGR2
Coexpression	M5909	HALLMARK_MYOGENESIS	H: Hallmark	2.363e-06	0.02203	6.863e-05	0.0006669	15	200	TPM2,FHL1,FST,COL6A3,BIN1,MRAS,SGCD,SH2B1,SMTN,IGFBP7,MYH11,MYLK,DENND2B,TAGLN,DTNA
Coexpression	M9273	GSE38304_MYC_NEG_VS_POS_GC_BCELL_UP	C7:IMMUNESIGDB: ImmuneSigDB	2.363e-06	0.02203	6.863e-05	0.0006669	15	200	BACH2,ARHGAP29,RBM38,PDZD4,ID3,RASL11B,PARD6G,TUBB2B,MARCKSL1,SLFN5,KCNMB4,STMN1,FRMD6,EGR2,R3HDM1
Coexpression	M3054	GSE10239_NAIVE_VS_KLRG1HIGH_EFF_CD8_TCELL_DN	C7:IMMUNESIGDB: ImmuneSigDB	2.363e-06	0.02203	6.863e-05	0.0006669	15	200	E2F7,MCM5,HMMR,ANLN,FHL1,FKBP1A,MELK,DUSP4,STMN1,CDCA8,RFWD3,ZNF503,UBASH3B,TOX2,ARHGAP19
Coexpression	M1347	SCHAEFFER_PROSTATE_DEVELOPMENT_6HR_DN	C2:CGP: Chemical and Genetic Perturbations	2.375e-06	0.02214	6.875e-05	0.000668	24	465	NREP,PKM,ARHGAP29,UPK3A,ID3,CLDND1,RND3,UHRF1,GIGYF2,MYCL,INHBA,GATA2,GATA3,DENND2B,RBMS3,NECTIN1,DNMT3A,GPC1,ZNF704,CALD1,RFWD3,LY6H,PHLDB2,RBFOX2
Coexpression	M17143	SASSON_RESPONSE_TO_GONADOTROPHINS_DN	C2:CGP: Chemical and Genetic Perturbations	2.4e-06	0.02237	6.926e-05	0.000673	10	86	TPM2,ACTA2,ACTG2,MAP4K4,CAP2,RGS5,AKAP12,GBP1,TUBA1A,RGS4
Coexpression Atlas	gudmap_kidney_adult_RenMedVasc_Tie2_1000	kidney_adult_RenMedVasc_Tie2_top-relative-expression-ranked_1000	Gudmap Mouse MOE430.2	2.42e-06	0.009487	1.814e-05	0.0001606	40	850	RAMP2,RHOJ,ATXN7L1,MCC,MEIS2,EHD3,ARHGAP31,ARHGAP29,MMP11,SEMA3F,PODXL,SP110,IFIT1,CDC42EP3,CRIP2,SMTN,ARHGDIB,TAF9B,IGFBP7,ISG15,CYYR1,LIMCH1,SNCG,DKK2,GBP1,SLFN5,BGN,CYRIA,NUAK1,NFIB,ST8SIA4,SASH1,UACA,CBFA2T3,LCP1,SEMA3D,TJP1,TNFAIP2,LY6E,SMAD1
Coexpression	M41658	TRAVAGLINI_LUNG_NEUROENDOCRINE_CELL	C8: Cell Type Signature	2.432e-06	0.02267	6.997e-05	0.0006799	12	128	APLP1,CRMP1,MIAT,TCEAL7,TUBB2B,SYT1,NNAT,DPYSL3,CALD1,STMN1,INA,PAK3
Coexpression Atlas	gudmap_developingKidney_e15.5_stage III -IV renal corpusc_500_k2	DevelopingKidney_e15.5_stage III -IV renal corpusc_emap-27945_k-means-cluster#2_top-relative-expression-ranked_500	Gudmap Mouse MOE430.2	2.446e-06	0.009588	1.83e-05	0.000162	16	186	CADM4,ADCY1,FOXC1,FOXC2,PODXL,WT1,DKK2,ARHGAP24,AIF1L,NTM,TMCC2,MAFB,GPC1,ZBTB8A,ADAMTS5,ENTPD3
Coexpression Atlas	gudmap_developingGonad_e16.5_testes_1000	DevelopingGonad_e16.5_testes_emap-8444_top-relative-expression-ranked_1000	Gudmap Mouse MOE430.2	2.453e-06	0.009614	1.831e-05	0.0001621	39	819	TPM1,TTYH1,VGLL3,RAMP2,CADM4,MYL9,SEMA5B,TBC1D14,FKBP1A,LTBP4,SDC1,RBM38,SFRP1,SFSWAP,SOSTDC1,SNRPN,INHBA,RBM26,TUBB2B,NFIB,NRK,NNAT,TAGLN,PCBP4,DDR1,CALD1,PLXDC1,NT5E,DTNA,CAMK2G,GSK3B,EDNRA,KATNBL1,PAK3,PSME3,LY6E,LY6H,RBFOX2,EPHA3
GO: Biological Process	GO:0040012	regulation of locomotion		2.455e-06	0.01406	0.0001654	0.001526	57	1399	TPM1,EPHB2,IGSF8,PDE4D,RHOJ,CADM4,ACTA2,MCAM,MCC,FAM89B,FBN2,SEMA5B,AMOTL2,MAP4K4,FOXC2,SEMA3F,JCAD,SFRP1,FN1,TNC,PODXL,WNT7A,AKAP12,POSTN,ARHGDIB,NKD1,DKK1,GLIPR2,LIMCH1,PRKG1,ATP2B4,MYADM,MYLK,GATA2,GATA3,TUBB2B,SULF1,NOVA2,DPYSL3,ZEB1,SASH1,STMN1,TFAP2A,LPAR1,GSK3B,EDNRA,OPRK1,TGFB2,SEMA3D,LMNA,TJP1,CCBE1,PAK3,GREM1,PHLDB2,TPBG,EPHA3
Coexpression Atlas	Arv_EB-LF_500_K2	AravindRamakr_EmbryoidBody-LF_top-relative-expression-ranked_500_k-means-cluster#2	PCBC	2.475e-06	0.009702	1.844e-05	0.0001633	19	255	PENK,ACTA2,DACT2,ACTG2,SBK1,IGLON5,COL9A1,DKK2,H19,INHBA,GDF10,DCX,NRK,DLX2,NNAT,TGFB2,PWWP3B,LY6H,EPHA3
Coexpression	MM689	TSENG_ADIPOGENIC_POTENTIAL_DN	M2:CGP: Chemical and Genetic Perturbations	2.518e-06	0.02347	7.222e-05	0.0007018	8	51	EPHB6,RAMP2,HLX,COL6A3,DKK3,GAS2,LPAR1,LY6H
Coexpression	M8776	HELLER_SILENCED_BY_METHYLATION_UP	C2:CGP: Chemical and Genetic Perturbations	2.549e-06	0.02376	7.266e-05	0.0007061	18	283	MCAM,TRIM22,COL9A2,OLFML2B,IFIT1,AKAP12,ISG15,PRSS2,ADAM19,GATA3,GBP1,CYRIA,BUB1,MAFB,IFI44L,KRT7,LCP1,TNFAIP2
Coexpression	M39117	AIZARANI_LIVER_C13_LSECS_2	C8: Cell Type Signature	2.549e-06	0.02376	7.266e-05	0.0007061	18	283	RAMP2,MEIS2,EHD3,COL4A1,ID3,AKAP12,SMTN,IGFBP7,ITPRIP,LIMCH1,MARCKSL1,NUAK1,NFIB,IFI44L,NOVA2,SASH1,TAMALIN,SLC7A8
Coexpression Atlas	gudmap_kidney_adult_GlomCapSys_Tie2_1000	kidney_adult_GlomCapSys_Tie2_top-relative-expression-ranked_1000	Gudmap Mouse MOE430.2	2.563e-06	0.01005	1.906e-05	0.0001687	40	852	RAMP2,RHOJ,MCC,MEIS2,EHD3,ARHGAP31,ARHGAP29,SEMA3F,JCAD,PODXL,OLFML2B,ID3,SP110,IFIT1,CRIP2,ARL4D,TAF9B,ISG15,CYYR1,LIMCH1,SNCG,DKK2,MYADM,GATA2,GBP1,SLFN5,TSPAN17,ST8SIA4,CALD1,UACA,ADAMTS5,CBFA2T3,MSRB3,TGFB2,THBS2,LMNA,TJP1,TNFAIP2,LY6E,PLEKHO1
Coexpression Atlas	Facebase_RNAseq_e9.5_Maxillary Arch_1000_K4	FacebaseRNAseq_e9.5_Maxillary Arch_top-relative-expression-ranked_1000_k-means-cluster#4	FaceBase_RNAseq	2.569e-06	0.01007	1.908e-05	0.0001688	18	232	MEIS2,KIAA1549L,SEMA5B,LTBP4,IGLON5,COL8A1,DPYSL4,ZNF43,NCAM2,DCX,ASTN2,WNK2,SHANK1,DTNA,MAMLD1,THBS2,SENP7,EPHA3
GO: Biological Process	GO:0001667	ameboidal-type cell migration		2.65e-06	0.01518	0.0001765	0.001629	36	720	RHOJ,ACTA2,MCC,FBN2,SEMA5B,ANLN,AMOTL2,MAP4K4,FOXC1,FOXC2,SEMA3F,JCAD,FN1,WNT7A,AKAP12,ARHGDIB,DKK1,GLIPR2,ATP2B4,PRSS2,GATA2,GATA3,MEIS3,TAGLN,SASH1,CALD1,TFAP2A,EDNRA,TGFB2,SEMA3D,CCBE1,PAK3,GREM1,CDH2,TPBG,EPHA3
Coexpression	M39168	MURARO_PANCREAS_ALPHA_CELL	C8: Cell Type Signature	2.652e-06	0.02472	7.521e-05	0.0007309	27	568	PDE4D,ADCY1,ADCY2,FABP5,CSRNP3,PGAP1,PKM,CNTN1,COL9A2,SESN3,APLP1,CDC42EP3,CRMP1,ZKSCAN1,LIMCH1,IFI6,TUBA1A,MAFB,NOVA1,CAMK2G,MAMLD1,STMN1,RGS4,SLC7A8,INA,PAK3,HSD17B14
Coexpression Atlas	gudmap_dev gonad_e11.5_M_GonMes_Sma_k1_500	dev gonad_e11.5_M_GonMes_Sma_k-means-cluster#1_top-relative-expression-ranked_500	Gudmap Mouse ST 1.0	2.665e-06	0.01045	1.975e-05	0.0001748	13	125	SFRP1,RGS5,CRABP2,RND3,POSTN,OLFML1,NRK,KRT7,CALD1,LPAR1,EDNRA,SEMA3D,EGR2
Coexpression	MM992	MCBRYAN_PUBERTAL_BREAST_6_7WK_DN	M2:CGP: Chemical and Genetic Perturbations	2.67e-06	0.02489	7.521e-05	0.0007309	10	87	ACTA2,ACTG2,UPK3A,SDC1,CNN1,SFRP1,TNC,MYH11,TAGLN,EGR2
Coexpression Atlas	gudmap_developingGonad_e11.5_testes_k4_200	DevelopingGonad_e11.5_testes_emap-3226_k-means-cluster#4_top-relative-expression-ranked_200	Gudmap Mouse MOE430.2	2.673e-06	0.01048	1.977e-05	0.000175	6	20	TUBB3,DPYSL4,CRMP1,TUBB2B,NEFL,PCBP4
Coexpression	M12848	CASTELLANO_NRAS_TARGETS_DN	C2:CGP: Chemical and Genetic Perturbations	2.678e-06	0.02497	7.521e-05	0.0007309	5	14	CDKN2A,RBM38,AKAP12,HTRA1,PLEKHO1
Coexpression	MM468	CASTELLANO_NRAS_TARGETS_DN	M2:CGP: Chemical and Genetic Perturbations	2.678e-06	0.02497	7.521e-05	0.0007309	5	14	CDKN2A,RBM38,AKAP12,HTRA1,PLEKHO1
Coexpression	M11615	CHANDRAN_METASTASIS_DN	C2:CGP: Chemical and Genetic Perturbations	2.679e-06	0.02497	7.521e-05	0.0007309	19	313	EPHB6,EYA4,RAMP2,MCC,TRIM29,UPK3A,SFRP1,COL13A1,SMTN,MOXD1,PDE5A,CCN2,MYLK,LPAR1,ZNF532,EGR2,HSD17B14,PSPC1,EPHA3
Coexpression Atlas	Facebase_RNAseq_e10.5_Neural Epithelium Overlying Lateral Eminence_500	FacebaseRNAseq_e10.5_Neural Epithelium Overlying Lateral Eminence_top-relative-expression-ranked_500	FaceBase_RNAseq	2.691e-06	0.01055	1.987e-05	0.0001759	28	493	TTYH1,MAP2,MEIS2,TUBB3,TUBB4A,KIAA1549L,SEMA5B,MGAT5B,WNT7A,POU3F1,ZNF43,DLL3,C11orf87,TUBB2B,DCX,SYT11,DLX2,NOVA1,DPYSL3,DTNA,MAMLD1,SOX21,INA,GPR137C,PAK3,TOX2,CDH2,EPHA3
Coexpression Atlas	facebase_RNAseq_e9.5_OlfPlac_2500	facebase_RNAseq_e9.5_OlfPlac_2500	Gudmap RNAseq	2.717e-06	0.01065	2.002e-05	0.0001772	63	1631	EYA4,MAP2,E2F7,MCM5,TRIM29,REEP2,SBK1,TUBB4A,KIAA1549L,PROM2,PKM,ALDH1A3,FHL1,RBM38,PCYT1B,TEAD2,COL9A1,PODXL,TUBB,WT1,SOSTDC1,POSTN,ZFP64,UHRF1,RAB15,CCN2,IL17RD,MYCL,CCP110,B4GALNT1,MYLK,GAS1,TUBB2B,MEIS3,AIF1L,DCX,MELK,TUBA1A,SULF1,NECTIN1,BUB1,NKAIN1,NNAT,PCBP4,WASF1,WNK2,GPC1,GLIPR1,NT5E,DTNA,TAF1C,DUSP4,NKIRAS2,TFAP2A,LSM12,CCBE1,TLE4,NAT10,ENTPD3,TOX2,CDH2,EPB41,ARHGAP19
GO: Biological Process	GO:0034329	cell junction assembly		2.726e-06	0.01561	0.0001794	0.001656	30	544	EPHB2,RAMP2,ASIC2,FZD1,SLITRK6,MAP4K4,SFRP1,FN1,CHODL,TNC,NLGN4Y,WNT7A,SLITRK3,LRRN3,DKK1,LIMCH1,PCDHB5,PARD6G,NECTIN1,ARHGEF9,PCDHB10,GSK3B,THBS2,TJP1,GREM1,CDH2,CDH12,PHLDB2,TPBG,EPHA3
Coexpression Atlas	gudmap_developingGonad_e18.5_epididymis_200	DevelopingGonad_e18.5_epididymis_emap-13166_top-relative-expression-ranked_200	Gudmap Mouse MOE430.2	2.738e-06	0.01073	2.013e-05	0.0001781	15	166	PENK,MEIS2,LTBP4,SFRP1,SFSWAP,PRKG1,INHBA,SULT1E1,NFIB,NRK,TAGLN,DPYSL3,GSK3B,EDNRA,EPHA3
Coexpression Atlas	Facebase_ST1_e10.5_NeuroEpith_CentrlOverEmin_250	e10.5_NeuroEpith_CentrlOverEmin_top-relative-expression-ranked_250	FaceBase_ST1	2.742e-06	0.01075	2.013e-05	0.0001781	17	210	TTYH1,RFTN2,KATNAL1,PGAP1,CAP2,MRAS,CRMP1,RND3,TUBB2B,SEPTIN2,TSPAN17,SYT11,SULF1,STMN3,SOX21,INA,PBX3
Coexpression	M45760	HE_LIM_SUN_FETAL_LUNG_C3_SCG3_POS_LYMPHATIC_ENDOTHELIAL_CELL	C8: Cell Type Signature	2.797e-06	0.02608	7.831e-05	0.000761	28	604	IGSF8,PDE4D,CTTNBP2,TUBB3,LTBP4,HSPA2,FOXC2,MRAS,NLGN4Y,CCDC80,LYPD3,IFI6,DKK3,ADAM19,PARD6G,TUBB2B,GDF10,OLFML1,CCDC3,SGCE,CTXN1,DTX3,CBFA2T3,SEMA3D,C1orf198,PAK3,TNFAIP2,TPBG
Coexpression Atlas	gudmap_developingKidney_e15.5_S-shaped body_1000_k2	DevelopingKidney_e15.5_S-shaped body_emap-27855_k-means-cluster#2_top-relative-expression-ranked_1000	Gudmap Mouse MOE430.2	2.813e-06	0.01103	2.061e-05	0.0001824	16	188	CADM4,MCAM,ADCY1,EHD3,FOXC1,PODXL,WT1,IGFBP7,CYYR1,ARHGAP24,NTM,TMCC2,MAFB,GPC1,ENTPD3,TNFAIP2
Coexpression	M2469	KRIEG_HYPOXIA_NOT_VIA_KDM3A	C2:CGP: Chemical and Genetic Perturbations	2.819e-06	0.02628	7.867e-05	0.0007645	32	746	TPM1,E2F7,MCM5,FZD1,TUBB3,SEMA5B,EVA1A,PKM,FHL1,SDC1,STARD4,TUBB,CCDC80,AKAP12,SMTN,UHRF1,CCN2,MYADM,FJX1,SYNC,MELK,OLFML2A,NEFL,NUAK1,BUB1,KCNMB1,DPYSL3,GSK3B,NARF,CDK2AP1,SLC7A5,PLEKHO1
Coexpression Atlas	gudmap_developingKidney_e15.5_Peripheral blastema_1000_k3	DevelopingKidney_e15.5_Peripheral blastema_emap-27731_k-means-cluster#3_top-relative-expression-ranked_1000	Gudmap Mouse MOE430.2	2.889e-06	0.01133	2.113e-05	0.000187	21	307	EYA4,ASIC2,ADCY2,ABCA9,MEIS2,FBN2,ANLN,UBE2E3,FOXC1,LRP12,COL12A1,AKAP12,POSTN,NSG1,OLFML1,CCDC3,ZBTB21,CACNA1C,ZEB1,LPAR1,CDH2
Coexpression	M45799	HE_LIM_SUN_FETAL_LUNG_C7_SST_POS_NEURON_CELL	C8: Cell Type Signature	2.89e-06	0.02694	8.043e-05	0.0007815	21	375	PENK,PLPPR3,REEP2,CNTN1,ISLR2,RAB15,SNCG,SPOCK1,GATA3,MEIS3,PDE10A,ASTN2,NOVA2,NT5E,RGS4,NCS1,PIANP,ENTPD3,PAK3,LY6H,TOX2
Coexpression Atlas	Facebase_RNAseq_e10.5_Olfactory Pit_500	FacebaseRNAseq_e10.5_Olfactory Pit_top-relative-expression-ranked_500	FaceBase_RNAseq	2.908e-06	0.0114	2.123e-05	0.0001879	28	495	EYA4,TENM2,TUBB3,TUBB4A,KIAA1549L,PROM2,ALDH1A3,RBM38,RAB15,IL17RD,MYCL,CCP110,GATA3,DCX,STMN3,NECTIN1,KCNMB4,NNAT,PCBP4,DPYSL3,DTNA,DUSP4,SOX21,INA,FRMD6,TOX2,CDH2,EPB41
Coexpression	M45681	HE_LIM_SUN_FETAL_LUNG_C0_MYOFIBROBLAST_1_CELL	C8: Cell Type Signature	2.918e-06	0.02721	8.094e-05	0.0007865	9	69	EYA4,ACTG2,JCAD,NKD1,RASL11B,MYH11,HTRA1,SYT1,ZEB1
Coexpression Atlas	gudmap_dev gonad_e12.5_F_VasAssMesen_MafB_k4_500	dev gonad_e12.5_F_VasAssMesen_MafB_k-means-cluster#4_top-relative-expression-ranked_500	Gudmap Mouse ST 1.0	2.921e-06	0.01145	2.128e-05	0.0001884	14	146	ADCY2,FBN2,COL6A3,SFRP1,RGS5,CRABP2,POSTN,NKD1,NRK,CALD1,EDNRA,TGFB2,HMCN1,EGR2
Coexpression	M16643	VERRECCHIA_DELAYED_RESPONSE_TO_TGFB1	C2:CGP: Chemical and Genetic Perturbations	2.926e-06	0.02728	8.094e-05	0.0007865	7	37	EPHB2,MMP11,SEMA3F,COL8A1,TNC,DDR1,THBS2
Coexpression	M34006	BLANCO_MELO_HUMAN_PARAINFLUENZA_VIRUS_3_INFECTION_A594_CELLS_UP	C2:CGP: Chemical and Genetic Perturbations	3.019e-06	0.02815	8.327e-05	0.0008092	15	204	MAP2,TRIM22,KIAA1549L,FST,PODXL,SP110,IFIT1,LRRN3,SAMD9,GBP1,IFI44L,GLIPR1,NT5E,SEMA3D,CCBE1
Coexpression Atlas	PCBC_ratio_SC_vs_MESO-5_cfr-2X-p05	Pluripotent Stem Cells_vs_Mesoderm Day 5-Confounder_removed-fold2.0_adjp0.05	PCBC_AltAnalyze	3.129e-06	0.01226	2.275e-05	0.0002014	38	796	IGSF8,TTYH1,RAMP2,E2F7,MCM5,HMMR,TRIM22,FABP5,CPT1C,FHL1,SDC1,PCYT1B,SESN3,APLP1,AKAP12,CRMP1,RND3,NSG1,IFI6,SNRPN,MIAT,FAM131B,TCEAL7,HTRA1,BRINP1,ANOS1,STMN3,NECTIN1,BUB1,ARHGEF9,SYT1,NKAIN1,DPYSL3,SLC7A8,THBS2,SOX21,TLE4,VASH2
Coexpression Atlas	Facebase_RNAseq_e8.5_Hind Brain Neural Epithelium_1000_K1	FacebaseRNAseq_e8.5_Hind Brain Neural Epithelium_top-relative-expression-ranked_1000_k-means-cluster#1	FaceBase_RNAseq	3.186e-06	0.01249	2.313e-05	0.0002047	13	127	REEP2,TUBB4A,MGAT5B,POU3F1,CRIP2,CRMP1,DLL3,IL17RD,STMN3,DTNA,INA,TLE4,TOX2
Coexpression	M2242	BRUINS_UVC_RESPONSE_VIA_TP53_GROUP_A	C2:CGP: Chemical and Genetic Perturbations	3.213e-06	0.02995	8.812e-05	0.0008563	36	899	TRAF5,ASIC2,ACTA2,TENM2,TUBB4A,CSRNP3,SEMA5B,FKBP1A,CNN1,CNTN1,FOXC1,COL13A1,CHODL,TNC,RND3,LRRN3,NKD1,DKK1,LYPD3,GLIPR2,DKK3,PRSS2,GATA3,LAMP5,SULT1E1,NTM,IFI44L,NNAT,DDR1,ADAMTS8,CBFA2T3,EDNRA,EGR2,GREM1,LAS1L,SENP7
Coexpression	M39056	MANNO_MIDBRAIN_NEUROTYPES_HRGL3	C8: Cell Type Signature	3.223e-06	0.03004	8.812e-05	0.0008563	27	574	TTYH1,RHOJ,CHST6,RFTN2,ADCY2,FZD1,TOM1L2,COL8A1,WNT7A,ID3,LRRN3,CCN2,LIMCH1,DKK3,HTRA1,ARHGAP24,SPOCK1,FJX1,DENND2B,FBXL7,SULF1,KCNMB1,KCNMB4,TMEM231,DTNA,CDK2AP1,EPHA3
Coexpression	M3335	HELLER_HDAC_TARGETS_UP	C2:CGP: Chemical and Genetic Perturbations	3.224e-06	0.03005	8.812e-05	0.0008563	19	317	CADM4,FHL1,HSPA2,FN1,APLP1,IFIT1,CRIP2,AKAP12,ISG15,IFI6,TUBB2B,MARCKSL1,NEFL,CYRIA,TUBA1A,SYT11,DLX2,WASF1,DHRS2
GO: Biological Process	GO:0010977	negative regulation of neuron projection development		3.278e-06	0.01877	0.0002115	0.001953	16	188	EPHB2,MAP2,SEMA5B,MAP4K4,TRIM46,SEMA3F,TNC,CRMP1,DKK1,SPOCK1,NTM,DPYSL3,LPAR1,GSK3B,SEMA3D,EPHA3
GO: Biological Process	GO:0071363	cellular response to growth factor stimulus		3.288e-06	0.01883	0.0002115	0.001953	42	914	RAMP2,CADM4,PENK,ACTA2,FAM89B,NREP,FZD1,FBN2,FST,FKBP1A,LTBP4,FOXC1,FOXC2,JCAD,SFRP1,WNT7A,SOSTDC1,SCUBE2,DKK1,RASL11B,CCN2,IL17RD,ATP2B4,DKK3,HTRA1,INHBA,GAS1,GATA3,GDF10,RBMS3,SULF1,WASF1,GPC1,ZEB1,TSC22D3,DUSP4,GSK3B,TGFB2,CCBE1,LTBP2,GREM1,SMAD1
GO: Molecular Function	GO:0030020	extracellular matrix structural constituent conferring tensile strength		3.312e-06	0.002825	0.0009418	0.0069	8	42	COL4A1,COL6A3,COL8A1,COL9A1,COL9A2,COL12A1,COL13A1,COL24A1
GO: Cellular Component	GO:0098590	plasma membrane region		3.364e-06	0.002153	0.0002392	0.001684	61	1565	TPM1,EPHB2,TTYH1,PDE4D,RAMP2,MAP2,TRPC4,TENM2,ADCY1,PICALM,EHD3,PROM2,UPK3A,AMOTL2,KIF17,CNTN1,JCAD,LRP12,COL13A1,FN1,SEPTIN5,PODXL,NLGN4Y,CLDND1,SLITRK3,NSG1,ATP2B4,MYLK,PARD6G,LAMP5,MARCKSL1,AIF1L,ZC4H2,SEPTIN6,SEPTIN2,SYT11,NECTIN1,SYT1,SGCE,GRIN3A,TMEM231,SHANK1,SLC12A6,CACNA1C,DDR1,NT5E,LCP1,TFAP2A,TAMALIN,LPAR1,OPRK1,SLC7A8,PIANP,KATNBL1,HMCN1,FRMD6,TJP1,SLC7A5,CDH2,PLEKHO1,EPB41
Coexpression	M41707	FAN_OVARY_CL5_HEALTHY_SELECTABLE_FOLLICLE_THECAL_CELL	C8: Cell Type Signature	3.375e-06	0.03146	9.198e-05	0.0008938	19	318	TPM2,VGLL3,FHL1,COL4A1,COL6A3,ARL4D,RND3,ISG15,NSG1,CCN2,IFI6,ATP5F1C,GBP1,LAMP5,BGN,SGCE,THAP9-AS1,CALD1,TLE4
Coexpression Atlas	Facebase_RNAseq_e8.5_Hind Brain Neural Epithelium_1000	FacebaseRNAseq_e8.5_Hind Brain Neural Epithelium_top-relative-expression-ranked_1000	FaceBase_RNAseq	3.399e-06	0.01332	2.463e-05	0.000218	44	991	HSPBP1,REEP2,TUBB4A,SEMA5B,PKM,FHL1,FST,MGAT5B,RBM38,SFRP1,PODXL,POU3F1,CRIP2,CRMP1,SCUBE2,NKD1,DLL3,UHRF1,CCN2,IL17RD,SNRPN,MYCL,MYLK,DOCK11,LAMP5,PDE10A,GDF10,MELK,NEFL,STMN3,BUB1,NNAT,PCBP4,NOVA1,DTNA,TAF1C,DUSP4,SDAD1,LSM12,SOX21,INA,TLE4,NAT10,TOX2
Coexpression Atlas	DevelopingLowerUrinaryTract_e14.5_ bladder_emap-6668_200	DevelopingLowerUrinaryTract_e14.5_ bladder_emap-6668_top-relative-expression-ranked_200	Gudmap Mouse MOE430.2	3.421e-06	0.01341	2.474e-05	0.000219	15	169	VGLL3,ACTG2,UPK3A,SLITRK6,PDE5A,DKK3,MYH11,GBP1,C11orf87,CYRIA,SULF1,ACTR3B,RGS4,MSRB3,TBX18
Coexpression Atlas	gudmap_dev lower uro neuro_e15.5_PelvicGanglion_Sox10_k3_200	dev lower uro neuro_e15.5_PelvicGanglion_Sox10_k-means-cluster#3_top-relative-expression-ranked_200	Gudmap Mouse ST 1.0	3.526e-06	0.01382	2.546e-05	0.0002253	8	44	EYA4,PENK,ACTA2,COL6A3,MOXD1,SULF1,EDNRA,HMCN1
Coexpression Atlas	gudmap_developingKidney_e13.5_podocyte cells_1000_k4	DevelopingKidney_e13.5_podocyte cells_emap-27773_k-means-cluster#4_top-relative-expression-ranked_1000	Gudmap Mouse MOE430.2	3.54e-06	0.01388	2.551e-05	0.0002258	21	311	EYA4,ASIC2,E2F7,ALDH1A3,FOXC1,FOXC2,COL13A1,CRMP1,DKK1,IL17RD,C11orf87,BRINP1,DCX,NEFL,HDGFL2,DNMT3A,ZFP90,GAL3ST4,NCS1,VASH2,CDH2
Coexpression	M6814	GSE7509_UNSTIM_VS_IFNA_STIM_IMMATURE_DC_UP	C7:IMMUNESIGDB: ImmuneSigDB	3.571e-06	0.03329	9.701e-05	0.0009427	14	181	MYL9,ANLN,TOM1L2,LMF1,STARD4,CRIP2,DCBLD2,FJX1,PCBP4,CTXN1,DUSP4,TAMALIN,CDK2AP1,ARHGAP19
Coexpression	M10351	BUYTAERT_PHOTODYNAMIC_THERAPY_STRESS_DN	C2:CGP: Chemical and Genetic Perturbations	3.583e-06	0.0334	9.701e-05	0.0009427	29	647	NREP,MEIS2,EHD3,FZD1,KIAA1549L,MYL9,RAD54B,AMOTL2,COL4A1,FN1,TUBB,ID3,CDC42EP3,SMTN,ARHGDIB,ISG15,CCN2,GBP1,FJX1,DENND2B,BUB1,TAGLN,GLIPR1,CALD1,LCP1,RGS4,TGFB2,TLE4,PSME3
Coexpression	M8673	MARTINEZ_TP53_TARGETS_DN	C2:CGP: Chemical and Genetic Perturbations	3.59e-06	0.03347	9.701e-05	0.0009427	28	612	BACH2,TENM2,MEIS2,FBN2,ALDH1A3,MRTFA,FOXC1,SP110,CELF1,SCMH1,RASL11B,CTNS,DKK2,GAS1,MARCKSL1,NFIB,RAB6A,DDR1,DPYSL3,CALD1,GSK3B,LSM12,CDK2AP1,EGR2,SLC7A5,LTBP2,SMAD1,RBFOX2
Coexpression Atlas	gudmap_developingLowerUrinaryTract_e13.5_bladder neck-urethr mesench_100	DevelopingLowerUrinaryTract_e13.5_bladder neck-urethr mesench_emap-3087_top-relative-expression-ranked_100	Gudmap Mouse MOE430.2	3.608e-06	0.01415	2.595e-05	0.0002297	11	91	EYA4,CSRNP3,PCDH10,COL8A1,SPOCK1,C11orf87,NEFL,ST6GAL2,STMN3,RGS4,EGR2
GO: Biological Process	GO:0035850	epithelial cell differentiation involved in kidney development		3.629e-06	0.02078	0.0002309	0.002131	11	90	ACTA2,ANLN,FOXC1,FOXC2,PODXL,WT1,OSR1,GATA3,TFAP2A,EDNRA,GREM1
Coexpression	M6906	SENESE_HDAC2_TARGETS_DN	C2:CGP: Chemical and Genetic Perturbations	3.638e-06	0.03391	9.801e-05	0.0009524	12	133	TPM1,MYL9,EVA1A,CAP2,SESN3,IGFBP7,NEFL,SYT11,NFIB,TAGLN,CTXN1,DTNA
Coexpression Atlas	gudmap_dev lower uro neuro_e15.5_PelvicGanglion_Sox10_k1_200	dev lower uro neuro_e15.5_PelvicGanglion_Sox10_k-means-cluster#1_top-relative-expression-ranked_200	Gudmap Mouse ST 1.0	3.675e-06	0.01441	2.637e-05	0.0002334	6	21	CNN1,NSG1,SNCG,NEFL,STMN3,NNAT
Coexpression Atlas	gudmap_developingKidney_e13.5_podocyte cells_200	DevelopingKidney_e13.5_podocyte cells_emap-27773_top-relative-expression-ranked_200	Gudmap Mouse MOE430.2	3.68e-06	0.01443	2.637e-05	0.0002334	15	170	EYA4,ABCA9,CNTN1,FOXC1,FOXC2,PODXL,WT1,DKK1,CYYR1,DKK2,GDF10,DCX,MAFB,TBX18,TNFAIP2
Coexpression Atlas	gudmap_developingLowerUrinaryTract_e14.5_ urethra_1000_k2	DevelopingLowerUrinaryTract_e14.5_ urethra_emap-30892_k-means-cluster#2_top-relative-expression-ranked_1000	Gudmap Mouse MOE430.2	3.722e-06	0.01459	2.662e-05	0.0002357	21	312	EYA4,BACH2,POGK,CELF1,ZKSCAN1,CYYR1,GIGYF2,PARD6G,C11orf87,NCAM2,GDF10,DCX,NRK,GRIN3A,ST8SIA4,EDNRA,TGFB2,SEMA3D,EPB41,RBFOX2,EPHA3
GO: Biological Process	GO:0001525	angiogenesis		3.75e-06	0.02147	0.0002359	0.002178	41	887	EPHB2,EPHB6,RAMP2,RHOJ,MCAM,E2F7,HLX,PKM,AMOTL2,FOXC1,FOXC2,COL4A1,JCAD,COL8A1,SFRP1,FN1,WNT7A,IGFBP7,CCN2,DCBLD2,ATP2B4,ARHGAP24,GATA2,SULF1,ARHGEF9,SLC12A6,SASH1,CALD1,PLXDC1,LPAR1,GSK3B,EDNRA,TGFB2,THBS2,TJP1,CCBE1,VASH2,PSME3,TNFAIP2,GREM1,SMAD1
Coexpression Atlas	gudmap_developingLowerUrinaryTract_e13.5_bladder mesenchyme_500_k2	DevelopingLowerUrinaryTract_e13.5_bladder mesenchyme_emap-3087_k-means-cluster#2_top-relative-expression-ranked_500	Gudmap Mouse MOE430.2	3.795e-06	0.01488	2.71e-05	0.0002398	13	129	TRAF5,MCC,FZD1,SFRP1,CYYR1,PDE5A,C11orf87,SGCE,UACA,TGFB2,TBX18,CDH2,RBFOX2
Coexpression	M13907	TSENG_IRS1_TARGETS_DN	C2:CGP: Chemical and Genetic Perturbations	3.934e-06	0.03667	0.0001054	0.001024	12	134	EPHB6,RAMP2,HLX,COL4A1,COL6A3,CRIP2,LIMCH1,DKK3,GAS2,SGCE,LPAR1,FRMD6
Coexpression	M5825	VART_KSHV_INFECTION_ANGIOGENIC_MARKERS_DN	C2:CGP: Chemical and Genetic Perturbations	3.934e-06	0.03667	0.0001054	0.001024	12	134	EPHB2,EPHB6,RAMP2,FZD1,SFRP1,WNT7A,ID3,DLL3,CCN2,PLXDC1,TGFB2,EPHA3
Coexpression Atlas	gudmap_developingLowerUrinaryTract_P2_bladder detrusor (LCM)_100_k2	DevelopingLowerUrinaryTract_P2_bladder detrusor (LCM)_emap-30376_k-means-cluster#2_top-relative-expression-ranked_100	Gudmap Mouse MOE430.2	3.955e-06	0.0155	2.819e-05	0.0002495	7	32	TPM2,ACTG2,MYL9,CNN1,MYH11,TAGLN,NT5E
Coexpression Atlas	gudmap_developingKidney_e11.5_metaneph mesench_500_k1	DevelopingKidney_e11.5_metaneph mesench_emap-3843_k-means-cluster#1_top-relative-expression-ranked_500	Gudmap Mouse MOE430.2	3.981e-06	0.0156	2.832e-05	0.0002507	9	59	COL9A1,RGS5,POU3F1,SNCG,C11orf87,NEFL,KCNMB4,GRIN3A,TBX18
GO: Biological Process	GO:0008045	motor neuron axon guidance		4.014e-06	0.02298	0.0002498	0.002306	10	74	E2F7,PLS3,FOXC1,FOXC2,SEMA3F,COL6A3,CHODL,EGR2,CDH2,EPHA3
Coexpression Atlas	gudmap_developingLowerUrinaryTract_e13.5_bladder neck-urethr mesench_1000_k5	DevelopingLowerUrinaryTract_e13.5_bladder neck-urethr mesench_emap-3087_k-means-cluster#5_top-relative-expression-ranked_1000	Gudmap Mouse MOE430.2	4.021e-06	0.01576	2.856e-05	0.0002528	11	92	PDE4D,ACTG2,TENM2,CAP2,CDC42EP3,PDE5A,PTHLH,CYRIA,ADAMTS5,TTLL7,LMNA
Coexpression	M39060	MANNO_MIDBRAIN_NEUROTYPES_HPROGFPL	C8: Cell Type Signature	4.045e-06	0.03771	0.000108	0.00105	19	322	EPHB2,HMMR,FZD1,ANLN,SDC1,CAP2,WNT7A,POU3F1,NKD1,CYYR1,UHRF1,CCN2,MELK,FBXL7,BUB1,CDCA8,SOX21,CDH2,TPBG
Coexpression	M2110	KIM_ALL_DISORDERS_CALB1_CORR_UP	C2:CGP: Chemical and Genetic Perturbations	4.069e-06	0.03793	0.0001084	0.001053	26	547	EPHB6,NREP,TUBB3,PKM,FHL1,UBE2E3,CAP2,APLP1,PREPL,CRMP1,WDR47,ATP5F1C,BRINP1,NEFL,CYRIA,SYT11,ARHGEF9,SYT1,KIF3C,NNAT,DDHD2,EHBP1,CAMK2G,RGS4,INA,PSME3
Coexpression	M5618	TURASHVILI_BREAST_DUCTAL_CARCINOMA_VS_LOBULAR_NORMAL_DN	C2:CGP: Chemical and Genetic Perturbations	4.187e-06	0.03903	0.0001109	0.001077	9	72	BACH2,ACTG2,CNN1,SFRP1,MYH11,MYLK,NFIB,TAGLN,PAK3
Coexpression	M41023	ERWIN_COHEN_BLOOD_VACCINE_TC_83_AGE_23_48YO_VACCINATED_VS_CONTROL_7DY_UP	C7:VAX: HIPC Vaccine Response	4.187e-06	0.03903	0.0001109	0.001077	9	72	TRIM22,IFIT1,ISG15,IFI6,SAMD9,GBP1,MAFB,IFI44L,LY6E
Coexpression Atlas	facebase_RNAseq_e9.5_MaxArch_2500	facebase_RNAseq_e9.5_MaxArch_2500	Gudmap RNAseq	4.198e-06	0.01646	2.976e-05	0.0002634	55	1371	RHOJ,PENK,E2F7,HLX,FAM89B,MCM5,HSPBP1,SBK1,PKM,ALDH1A3,MEX3B,RBM38,FOXC1,TEAD2,COL9A1,TUBB,DPYSL4,CRABP2,CRMP1,ARL4D,POSTN,MOXD1,SHF,ZFP64,CYYR1,UHRF1,CCN2,LIMCH1,IL17RD,GATA3,MARCKSL1,MEIS3,AIF1L,MELK,GGA3,OLFML1,TUBA1A,NTM,BUB1,NKAIN1,GPC2,NNAT,PCBP4,WASF1,CTXN1,GPC1,NKIRAS2,TFAP2A,LPAR1,LSM12,HMCN1,CDK2AP1,NAT10,TOX2,PLEKHO1
Coexpression Atlas	gudmap_kidney_adult_Mesangium_Meis_k1_500	kidney_adult_Mesangium_Meis_k-means-cluster#1_top-relative-expression-ranked_500	Gudmap Mouse MOE430.2	4.209e-06	0.0165	2.979e-05	0.0002636	8	45	ABCA9,PLS3,FOXC1,TAF9B,IGFBP7,HTRA1,TSPAN17,UACA
Coexpression	M15107	JAATINEN_HEMATOPOIETIC_STEM_CELL_UP	C2:CGP: Chemical and Genetic Perturbations	4.23e-06	0.03943	0.0001117	0.001086	19	323	MCM5,NREP,FABP5,FHL1,PLS3,IGFBP7,CYYR1,UHRF1,LIMCH1,GATA2,COL24A1,WASF1,DPYSL3,ZBTB8A,STMN1,MSRB3,CDK2AP1,FRMD6,SMAD1
Coexpression	M2772	ESC_V6.5_UP_LATE.V1_UP	C6: Oncogenic Signature	4.326e-06	0.04033	0.0001139	0.001107	14	184	RAMP2,COL4A1,PODXL,CLDND1,POSTN,DKK1,H19,GAS1,NRK,SGCE,LCP1,NARF,CDH2,ARMH4
Coexpression	M14985	BASAKI_YBX1_TARGETS_UP	C2:CGP: Chemical and Genetic Perturbations	4.346e-06	0.04052	0.0001141	0.001109	18	294	E2F7,MCM5,ANLN,CDC42EP3,RND3,DKK1,UHRF1,CCN2,DKK3,MELK,TUBA1A,BUB1,DPYSL3,SAE1,CDCA8,FRMD6,SLC7A5,PHLDB2
Coexpression	M1350	SCHAEFFER_PROSTATE_DEVELOPMENT_48HR_UP	C2:CGP: Chemical and Genetic Perturbations	4.361e-06	0.04065	0.0001142	0.00111	23	449	PENK,PROM2,ALDH1A3,SLITRK6,PLS3,ID3,RASL11B,RAB15,GATA3,AIF1L,SULT1E1,COL24A1,MAFB,KCNMB4,WNK2,KRT7,TSC22D3,NT5E,PSCA,CCBE1,SERTAD4,LY6E,EPHA3
GO: Biological Process	GO:0040008	regulation of growth		4.388e-06	0.02513	0.0002702	0.002494	40	861	CDKN2A,MAP2,HLX,NDRG3,PICALM,SEMA5B,FHL1,LTBP4,FOXC1,FOXC2,TRIM46,SEMA3F,ISLR2,LRP12,SFRP1,FN1,TNC,WT1,CRABP2,NKD1,TAF9B,IGFBP7,CELF1,DCBLD2,PRSS2,SPOCK1,INHBA,GAS1,PARD6G,DCX,SYT1,HDGFL2,CACNA1C,DDR1,RGS4,GSK3B,TGFB2,SEMA3D,TLL2,GREM1
Coexpression Atlas	Facebase_RNAseq_ratio_e9.5_MandibularArch_vs_MaxillaryArch_1000_K2	FacebaseRNAseq_ratio_e9.5_MandibularArch_vs_MaxillaryArch_top-relative-expression-ranked_1000_k-means-cluster#2	FaceBase_RNAseq	4.396e-06	0.01723	3.105e-05	0.0002748	20	290	PDE4D,SLITRK6,COL6A3,COL9A2,OLFML2B,SP110,OSR1,ATP2B4,DKK2,P4HA3,BGN,COL24A1,ST6GAL2,OLFML1,NFIB,CCDC3,MAFB,CACNA1C,KRT7,THBS2
Coexpression Atlas	gudmap_developingKidney_e14.5 whole kidney - Wnt4 KO_1000_k1	DevelopingKidney_e14.5 whole kidney - Wnt4 KO_emap-6674_k-means-cluster#1_top-relative-expression-ranked_1000	Gudmap Mouse MOE430.2	4.517e-06	0.01771	3.184e-05	0.0002819	16	195	TPM2,RCBTB2,MEIS2,CPT1C,UBE2E3,MEX3B,TUBB,RND3,MOXD1,GAS1,ZC4H2,DCX,TGFB2,HMCN1,PWWP3B,CDH2
Coexpression	MM999	SCHAEFFER_PROSTATE_DEVELOPMENT_6HR_DN	M2:CGP: Chemical and Genetic Perturbations	4.541e-06	0.04233	0.0001186	0.001152	24	483	NREP,PKM,ARHGAP29,UPK3A,ID3,CLDND1,RND3,UHRF1,GIGYF2,MYCL,INHBA,GATA2,GATA3,DENND2B,RBMS3,NECTIN1,DNMT3A,GPC1,ZNF704,CALD1,RFWD3,LY6H,PHLDB2,RBFOX2
Coexpression	M39121	AIZARANI_LIVER_C20_LSECS_3	C8: Cell Type Signature	4.556e-06	0.04247	0.0001186	0.001153	18	295	RHOJ,MCAM,ARHGAP29,FKBP1A,FOXC1,COL4A1,SEMA3F,AKAP12,IGFBP7,ITPRIP,LIMCH1,MARCKSL1,ZEB1,SASH1,UACA,SLC7A8,LMNA,TOX2
Coexpression Atlas	Facebase_ST1_e9.5_NeuroEpith_OverFaceMesench_500	e9.5_NeuroEpith_OverFaceMesench_top-relative-expression-ranked_500	FaceBase_ST1	4.56e-06	0.01787	3.209e-05	0.000284	22	342	REEP2,TUBB4A,PGAP1,SFRP1,WNT7A,DPYSL4,NKD1,CELF1,MYCL,TUBB2B,NEFL,SYT11,ZNF704,DPYSL3,SDAD1,GSK3B,SOX21,INA,PAK3,LY6H,TOX2,ARMH4
GO: Biological Process	GO:0044087	regulation of cellular component biogenesis		4.562e-06	0.02612	0.0002779	0.002565	50	1189	TPM1,EPHB2,MAP2,ASIC2,TENM2,CNOT6,FZD1,TUBB4A,ANLN,TBC1D14,SLITRK6,MAP4K4,HSPA2,SDC1,FOXC2,BIN1,SFRP1,TNC,PODXL,WNT7A,SLITRK3,STIL,CDC42EP3,LRRN3,DKK1,ISG15,CCN2,LIMCH1,CCP110,MYADM,ARHGAP24,DOCK11,GBP1,CYRIA,SYT11,NECTIN1,ARHGEF9,SHANK1,DPYSL3,STMN1,LCP1,LPAR1,GSK3B,THBS2,TJP1,PAK3,GREM1,PHLDB2,TPBG,EPHA3
Coexpression	M2768	ESC_J1_UP_LATE.V1_UP	C6: Oncogenic Signature	4.607e-06	0.04295	0.0001196	0.001163	14	185	RAMP2,FST,COL4A1,PODXL,SESN3,CCN2,H19,HTRA1,SPOCK1,DENND2B,BGN,NRK,SGCE,GLIPR1
Coexpression Atlas	gudmap_kidney_P0_JuxtaGlom_Ren1_k3_500	kidney_P0_JuxtaGlom_Ren1_k-means-cluster#3_top-relative-expression-ranked_500	Gudmap Mouse MOE430.2	4.613e-06	0.01808	3.241e-05	0.0002869	10	76	PLS3,CCDC80,POSTN,IGFBP7,CCN2,PRKG1,DKK2,GATA3,BGN,CALD1
Coexpression Atlas	Facebase_ST1_e10.5_NeuroEpith_MedialEmin_500_2	e10.5_NeuroEpith_MedialEmin_top-relative-expression-ranked_500_2	FaceBase_ST1	4.654e-06	0.01824	3.261e-05	0.0002887	18	242	REEP2,PGAP1,DPYSL4,NKD1,CELF1,MYCL,TUBB2B,NEFL,SYT11,DPYSL3,SDAD1,GSK3B,SOX21,INA,PAK3,LY6H,TOX2,ARMH4
Coexpression Atlas	Facebase_RNAseq_e10.5_Maxillary Arch_2500_K4	FacebaseRNAseq_e10.5_Maxillary Arch_top-relative-expression-ranked_2500_k-means-cluster#4	FaceBase_RNAseq	4.659e-06	0.01826	3.261e-05	0.0002887	33	655	EYA4,PDE4D,ADCY2,SLITRK6,KIF17,FOXC1,PCYT1B,COL6A3,COL9A2,MRAS,CHODL,TNC,SP110,ISG15,ZFP64,OSR1,LIMCH1,ATP2B4,DKK2,INHBA,GATA2,GATA3,P4HA3,COL24A1,OLFML1,CCDC3,GPC2,CACNA1C,KRT7,CBFA2T3,LCP1,FRMD6,EGR2
Coexpression	MM1189	CUI_TCF21_TARGETS_2_UP	M2:CGP: Chemical and Genetic Perturbations	4.691e-06	0.04373	0.0001215	0.00118	23	451	IGSF8,PENK,MCM5,HSPBP1,HMMR,ADCY2,SBK1,MEX3A,MMP11,TEAD2,FN1,CCDC80,POSTN,NKD1,UHRF1,TMEM231,PCBP4,STMN1,CDCA8,EDNRA,CDK2AP1,VASH2,SERTAD4
Coexpression Atlas	gudmap_dev gonad_e12.5_F_VasAssMesen_MafB_200	dev gonad_e12.5_F_VasAssMesen_MafB_top-relative-expression-ranked_200	Gudmap Mouse ST 1.0	4.695e-06	0.0184	3.281e-05	0.0002904	14	152	MYL9,ARHGAP29,FST,COL12A1,WT1,CCDC80,CRABP2,POSTN,NKD1,SULF1,NRK,EDNRA,HMCN1,EGR2
GO: Biological Process	GO:0009880	embryonic pattern specification		4.713e-06	0.02699	0.0002841	0.002622	13	130	MEIS2,PGAP1,AMOTL2,SEMA3F,FN1,WNT7A,WT1,STIL,MEIS3,MAFB,TFAP2A,EDNRA,SMAD1
Coexpression Atlas	Facebase_RNAseq_e9.5_Facial Mesenchyne_2500_K1	FacebaseRNAseq_e9.5_Facial Mesenchyne_top-relative-expression-ranked_2500_k-means-cluster#1	FaceBase_RNAseq	4.756e-06	0.01864	3.317e-05	0.0002936	28	508	PDE4D,ACTG2,ADCY2,MARCHF4,KIF17,FOXC1,MRAS,CHODL,TNC,SGCD,IGFBP7,DLL3,DKK3,HTRA1,INHBA,GAS2,P4HA3,C11orf87,LAMP5,SLFN5,PDE10A,FBXL7,CCDC3,NT5E,THBS2,LMNA,LTBP2,HSD17B14
Coexpression	M12746	KOYAMA_SEMA3B_TARGETS_UP	C2:CGP: Chemical and Genetic Perturbations	4.762e-06	0.04439	0.000123	0.001195	17	267	CNTNAP3,CCDC80,CRABP2,SMTN,ARHGDIB,CELF1,TTC17,CCN2,DCBLD2,SYT1,KIF3C,NOVA1,GLIPR1,MAMLD1,LTBP2,HSD17B14,TOX2
Coexpression	M2477	ALFANO_MYC_TARGETS	C2:CGP: Chemical and Genetic Perturbations	4.786e-06	0.04462	0.0001233	0.001198	16	239	PICALM,SDC1,PCYT1B,ID3,CDC42EP3,CRIP2,AKAP12,SMTN,DKK3,MYLK,KIF3C,ZEB1,STMN1,TGFB2,GREM1,LY6E
Coexpression	M39221	LAKE_ADULT_KIDNEY_C2_PODOCYTES	C8: Cell Type Signature	4.839e-06	0.04511	0.0001243	0.001208	15	212	CTTNBP2,TENM2,PICALM,PODXL,CCN2,PRKG1,HTRA1,SPOCK1,FBXL7,SULF1,CALD1,UACA,SLC7A8,TJP1,ARMH4
Coexpression Atlas	PCBC_ratio_PulmonMicrovasc_vs_SC_cfr-2X-p05	Pulmonary Microvascular_vs_Pluripotent Stem Cells-Confounder_removed-fold2.0_adjp0.05	PCBC_AltAnalyze	4.899e-06	0.0192	3.407e-05	0.0003016	65	1733	EPHB2,CDKN2A,RAMP2,CNTNAP3,MCAM,FAM89B,FABP5,ARHGAP31,ANLN,EVA1A,ARHGAP29,AMOTL2,FKBP1A,TOM1L2,COL4A1,SEMA3F,JCAD,COL8A1,COL13A1,FN1,CRIP2,AKAP12,SMTN,WDR47,POSTN,ARHGDIB,DKK1,IGFBP7,GLIPR2,ITPRIP,CCN2,SNCG,ATP2B4,DKK3,CNTNAP3B,PRSS2,HTRA1,ARHGAP24,SPOCK1,GATA2,P4HA3,FJX1,BGN,SULT1E1,CYRIA,FBXL7,DDHD2,GLIPR1,KRT7,SASH1,UACA,NT5E,TAMALIN,RGS4,MSRB3,TGFB2,TBX18,NBPF15,LMNA,FRMD6,LTBP2,UBASH3B,TOX2,…
Coexpression Atlas	gudmap_kidney_adult_RenalCapsule_200	kidney_adult_RenalCapsule_top-relative-expression-ranked_200	Gudmap Mouse MOE430.2	4.902e-06	0.01921	3.407e-05	0.0003016	15	174	PENK,ABCA9,COL8A1,COL12A1,CCDC80,ARHGDIB,IGFBP7,HTRA1,GBP1,SLFN5,BGN,SULF1,TAGLN,KRT7,ADAMTS5
Coexpression	M8455	HOOI_ST7_TARGETS_UP	C2:CGP: Chemical and Genetic Perturbations	4.916e-06	0.04583	0.0001259	0.001224	10	93	EVA1A,FHL1,JCAD,PODXL,ID3,SYT1,GLIPR1,RFWD3,CCBE1,LY6E
Coexpression Atlas	gudmap_developingLowerUrinaryTract_P2_bladder detrusor (LCM)_200_k2	DevelopingLowerUrinaryTract_P2_bladder detrusor (LCM)_emap-30376_k-means-cluster#2_top-relative-expression-ranked_200	Gudmap Mouse MOE430.2	4.929e-06	0.01932	3.414e-05	0.0003021	7	33	TPM2,ACTG2,SCUBE2,MYH11,NIPAL4,NT5E,THBS2
Coexpression Atlas	gudmap_developingGonad_P2_epididymis_200_k5	DevelopingGonad_P2_epididymis_emap-30199_k-means-cluster#5_top-relative-expression-ranked_200	Gudmap Mouse MOE430.2	4.929e-06	0.01932	3.414e-05	0.0003021	7	33	CNN1,MYH11,INHBA,NFIB,NRK,TAGLN,DPYSL3
Coexpression	M41743	RUBENSTEIN_SKELETAL_MUSCLE_ENDOTHELIAL_CELLS	C8: Cell Type Signature	4.953e-06	0.04618	0.0001265	0.001229	12	137	RAMP2,FABP5,ARHGAP29,FKBP1A,PLS3,COL4A1,PODXL,ID3,CRIP2,ISG15,UACA,LY6E
GO: Biological Process	GO:0044089	positive regulation of cellular component biogenesis		4.985e-06	0.02854	0.0002973	0.002744	31	590	TPM1,EPHB2,ASIC2,TENM2,CNOT6,ANLN,SLITRK6,MAP4K4,SDC1,FOXC2,BIN1,SFRP1,TNC,WNT7A,SLITRK3,STIL,CDC42EP3,LRRN3,ISG15,CCN2,LIMCH1,CCP110,DOCK11,GBP1,DPYSL3,LCP1,LPAR1,GSK3B,THBS2,PHLDB2,TPBG
Coexpression	M45796	HE_LIM_SUN_FETAL_LUNG_C7_MID_SCHWANN_CELL	C8: Cell Type Signature	5.005e-06	0.04665	0.0001275	0.001239	17	268	VGLL3,RHOJ,MYL9,COL4A1,FN1,TNC,OLFML2B,SOSTDC1,SMTN,LIMCH1,IFI6,LAMP5,OLFML2A,ADAMTS5,LPAR1,TLL2,TPBG
Coexpression	M39265	HU_FETAL_RETINA_HORIZONTAL	C8: Cell Type Signature	5.067e-06	0.04723	0.0001287	0.001251	7	40	MIAT,TUBB2B,TUBA1A,NNAT,STMN1,TFAP2A,INA
Coexpression	M39102	ZHONG_PFC_C3_ASTROCYTE	C8: Cell Type Signature	5.104e-06	0.04758	0.0001293	0.001256	21	389	FAM89B,ADCY1,CNOT6,CNTN1,PDZD4,TRIM46,TOM1L2,BIN1,MIAT,FAM131B,MEIS3,TSPAN17,SYT1,NKAIN1,DPYSL3,ZFP90,DUSP4,ZBTB8A,CBFA2T3,CCBE1,VASH2
Coexpression Atlas	gudmap_developingGonad_e18.5_testes_1000_k4	DevelopingGonad_e18.5_testes_emap-11164_k-means-cluster#4_top-relative-expression-ranked_1000	Gudmap Mouse MOE430.2	5.13e-06	0.02011	3.547e-05	0.0003139	20	293	TTYH1,VGLL3,ACTG2,MYL9,SEMA5B,LTBP4,ISLR2,OLFML2B,OSR1,MYH11,INHBA,NFIB,NRK,TAGLN,NT5E,DTNA,ADAMTS5,EDNRA,PAK3,LY6E
Coexpression	MM985	BERENJENO_TRANSFORMED_BY_RHOA_DN	M2:CGP: Chemical and Genetic Perturbations	5.131e-06	0.04783	0.0001296	0.001259	22	421	NDRG3,FZD1,UBE2H,LTBP4,HSPA2,MRTFA,SEMA3F,COL6A3,FN1,ID3,CCDC80,AKAP12,POSTN,DKK3,GAS1,GAS2,MEIS3,NFIB,ZFP90,LPAR1,THBS2,LY6H
Coexpression Atlas	gudmap_developingLowerUrinaryTract_e15.5_ureteral tissue_1000_k1	DevelopingLowerUrinaryTract_e15.5_ureteral tissue_emap-8234_k-means-cluster#1_top-relative-expression-ranked_1000	Gudmap Mouse MOE430.2	5.182e-06	0.02031	3.577e-05	0.0003166	12	113	EYA4,CNTN1,FOXC2,COL9A1,CRMP1,C11orf87,DCX,NEFL,STMN3,SYT1,GRIN3A,RGS4
Coexpression	M1472	PETROVA_PROX1_TARGETS_DN	C2:CGP: Chemical and Genetic Perturbations	5.208e-06	0.04855	0.0001309	0.001272	8	56	TRIM22,CAP2,ARHGDIB,NUAK1,KRT7,RGS4,LTBP2,CDH2
Coexpression	M5929	CROONQUIST_STROMAL_STIMULATION_UP	C2:CGP: Chemical and Genetic Perturbations	5.208e-06	0.04855	0.0001309	0.001272	8	56	TPM2,ACTA2,COL6A3,IGFBP7,CCN2,SULF1,TSC22D3,THBS2
Coexpression Atlas	ratio_DE_vs_SC_1000_K3	ratio_induced-DefinitiveEndoderm_vs_StemCell_top-relative-expression-ranked_1000_k-means-cluster#3	PCBC	5.255e-06	0.0206	3.617e-05	0.0003201	21	319	CDKN2A,TENM2,ARHGAP29,ALDH1A3,SLITRK6,AMOTL2,COL8A1,FN1,TNC,DKK1,CCN2,DKK3,SLFN5,PTHLH,OLFML1,GLIPR1,MAMLD1,ADAMTS5,ZNF503,SERTAD4,GREM1
Coexpression Atlas	gudmap_developingGonad_e14.5_ epididymis_500_k4	DevelopingGonad_e14.5_ epididymis_emap-29141_k-means-cluster#4_top-relative-expression-ranked_500	Gudmap Mouse MOE430.2	5.259e-06	0.02061	3.617e-05	0.0003201	15	175	MEIS2,CHODL,SFSWAP,PRKG1,INHBA,DOCK11,AIF1L,GDF10,RBMS3,NFIB,DNMT3A,GSK3B,EDNRA,TGFB2,EPHA3
Coexpression	M1919	COLINA_TARGETS_OF_4EBP1_AND_4EBP2	C2:CGP: Chemical and Genetic Perturbations	5.369e-06	0.05005	0.0001345	0.001307	20	359	RAMP2,HMMR,ANLN,CPT1C,FST,FOXC1,FOXC2,SESN3,ID3,AKAP12,POSTN,ISG15,NSG1,OSR1,MELK,TSPAN17,NFIB,SASH1,LTBP2,LY6E
Coexpression Atlas	PCBC_ratio_MESO-5_vs_DE_cfr-2X-p05	Mesoderm Day 5_vs_Endoderm Differentiated Cells-Confounder_removed-fold2.0_adjp0.05	PCBC_AltAnalyze	5.516e-06	0.02162	3.787e-05	0.0003352	21	320	EPHB2,PLPPR3,FST,COL4A1,JCAD,COL9A2,PODXL,CRABP2,CDC42EP3,ARL4D,ARHGAP24,SPOCK1,GATA3,FJX1,PDE10A,ST8SIA4,DUSP4,EDNRA,NBPF15,LY6E,HSD17B14
Coexpression	MM1071	KATSANOU_ELAVL1_TARGETS_UP	M2:CGP: Chemical and Genetic Perturbations	5.552e-06	0.05175	0.0001387	0.001348	14	188	ALDH1A3,FOXC1,RGS5,OLFML2B,PDE5A,SNCG,MYH11,FJX1,AIF1L,FBXL7,NRK,KCNMB1,ADAMTS5,HMCN1
Coexpression	MM1001	SCHAEFFER_PROSTATE_DEVELOPMENT_48HR_UP	M2:CGP: Chemical and Genetic Perturbations	5.592e-06	0.05213	0.0001394	0.001354	24	489	PENK,PROM2,ALDH1A3,SLITRK6,PLS3,ID3,RASL11B,RAB15,GATA3,AIF1L,SULT1E1,COL24A1,MAFB,KCNMB4,WNK2,KRT7,TSC22D3,NT5E,PSCA,CCBE1,SERTAD4,LY6E,LY6H,EPHA3
Coexpression	M12816	DOANE_RESPONSE_TO_ANDROGEN_DN	C2:CGP: Chemical and Genetic Perturbations	5.61e-06	0.0523	0.0001395	0.001355	16	242	TRAF5,MCAM,MCM5,RAD54B,SEMA3F,TNC,CRABP2,SP110,TAF9B,RAB15,GATA3,FBXL7,PCBP4,GPC1,DTX3,DUSP4
Coexpression	M5091	EINAV_INTERFERON_SIGNATURE_IN_CANCER	C2:CGP: Chemical and Genetic Perturbations	5.666e-06	0.05282	0.0001405	0.001365	6	27	SP110,IFIT1,ISG15,IFI6,IFI44L,LY6E
Coexpression Atlas	gudmap_developingKidney_e11.5_metaneph mesench_1000_k5	DevelopingKidney_e11.5_metaneph mesench_emap-3843_k-means-cluster#5_top-relative-expression-ranked_1000	Gudmap Mouse MOE430.2	5.682e-06	0.02227	3.894e-05	0.0003447	12	114	COL9A1,RGS5,DPYSL4,POU3F1,CRMP1,SNCG,C11orf87,NEFL,TMCC2,KCNMB4,GRIN3A,TBX18
GO: Biological Process	GO:0048588	developmental cell growth		5.694e-06	0.0326	0.0003361	0.003102	23	369	MAP2,PICALM,SEMA5B,ARIH2,TRIM46,SEMA3F,ISLR2,COL6A3,FN1,TNC,CRABP2,POSTN,CELF1,PRKG1,PARD6G,DCX,SYT1,WASF1,DDR1,RGS4,GSK3B,EDNRA,SEMA3D
GO: Cellular Component	GO:0030424	axon		5.733e-06	0.003669	0.0003669	0.002583	41	910	EPHB2,IGSF8,TTYH1,MAP2,PENK,CNTNAP3,TENM2,TUBB3,TUBB4A,CPT1C,FKBP1A,CNTN1,TRIM46,BIN1,SEPTIN5,CRMP1,WDR47,SNCG,CNTNAP3B,SPOCK1,NCAM2,LAMP5,DCX,SEPTIN6,NEFL,SYT11,NFIB,STMN3,NTM,NECTIN1,SYT1,KIF3C,SLC12A6,CACNA1C,DPYSL3,DTNA,GSK3B,NCS1,OPRK1,TGFB2,TPBG
Coexpression	MM455	LAZARO_GENETIC_MOUSE_MODEL_HIGH_GRADE_LARGE_CELL_NEUROENDOCRINE_LUNG_CARCINOMA_DN	M2:CGP: Chemical and Genetic Perturbations	5.788e-06	0.05395	0.0001431	0.001391	24	490	RAMP2,MCC,MYL9,ARHGAP29,FHL1,LTBP4,CNN1,AKAP12,LRRN3,SCUBE2,CYYR1,PDE5A,IL17RD,MYADM,MYH11,GATA2,CYRIA,OLFML1,TMCC2,TAGLN,ST8SIA4,ADAMTS8,CBFA2T3,PHLDB2
Coexpression Atlas	gudmap_developingLowerUrinaryTract_e13.5_bladder neck-urethr epithel_500	DevelopingLowerUrinaryTract_e13.5_bladder neck-urethr epithel_emap-30875_top-relative-expression-ranked_500	Gudmap Mouse MOE430.2	5.822e-06	0.02282	3.983e-05	0.0003525	24	401	EYA4,TRIM29,TENM2,PROM2,PCDH10,UBE2E3,COL8A1,IFIT1,CDC42EP3,RND3,MOXD1,LYPD3,MYCL,PARD6G,NTM,KRT7,TFAP2A,SEMA3D,SOX21,EGR2,ENTPD3,SERTAD4,TPBG,ARMH4
Coexpression Atlas	ratio_DE_vs_SC_500_K1	ratio_induced-DefinitiveEndoderm_vs_StemCell_top-relative-expression-ranked_500_k-means-cluster#1	PCBC	5.846e-06	0.02292	3.992e-05	0.0003534	23	374	DACT2,HLX,ARHGAP29,AMOTL2,PCDH10,FOXC1,JCAD,COL9A2,FN1,ARL4D,DKK1,GLIPR2,ARHGAP24,ADAM19,GATA3,MEIS3,PDE10A,RBMS3,TAGLN,ADAMTS5,SERTAD4,GREM1,CDH2
Coexpression Atlas	ratio_EB_vs_SC_500_K2	ratio_EmbryoidBody_vs_StemCell_top-relative-expression-ranked_500_k-means-cluster#2	PCBC	5.856e-06	0.02296	3.992e-05	0.0003534	10	78	CDKN2A,RHOJ,FOXC2,COL8A1,WT1,POSTN,IGFBP7,GATA2,SULT1E1,MSRB3
GO: Biological Process	GO:0001501	skeletal system development		5.894e-06	0.03375	0.0003444	0.003178	39	840	MEIS2,FBN2,HOXD11,FST,PLS3,FOXC1,WDR48,FOXC2,COL9A1,COL9A2,SFRP1,COL13A1,FN1,WNT7A,SCUBE2,DLL3,OSR1,CCN2,DCHS2,GAS1,GATA3,MARCKSL1,GDF10,PTHLH,BGN,RBMS3,SULF1,NFIB,DLX2,CACNA1C,ZEB1,TFAP2A,LPAR1,EDNRA,TGFB2,SEMA3D,GREM1,CDH2,SMAD1
Coexpression Atlas	gudmap_developingLowerUrinaryTract_e14.5_ urogenital sinus_200_k3	DevelopingLowerUrinaryTract_e14.5_ urogenital sinus_emap-5517_k-means-cluster#3_top-relative-expression-ranked_200	Gudmap Mouse MOE430.2	5.917e-06	0.02319	4.027e-05	0.0003564	8	47	TUBB3,COL9A1,C11orf87,DCX,NEFL,STMN3,GRIN3A,RGS4
Coexpression Atlas	gudmap_dev gonad_e11.5_M_ReproVasc_Flk_k4_1000	dev gonad_e11.5_M_ReproVasc_Flk_k-means-cluster#4_top-relative-expression-ranked_1000	Gudmap Mouse ST 1.0	5.929e-06	0.02324	4.028e-05	0.0003565	28	514	PDE4D,RAMP2,RHOJ,MCAM,HLX,RFTN2,ARHGAP31,FKBP1A,COL4A1,STARD4,SP110,CRIP2,CRMP1,SMTN,ARHGDIB,CYYR1,LIMCH1,SNCG,DOCK11,SLFN5,PDE10A,ST8SIA4,UACA,LCP1,TJP1,TNFAIP2,UBASH3B,PLEKHO1
Coexpression Atlas	Facebase_RNAseq_e10.5_Neural Epithelium Overlying Central Eminence_2500_K4	FacebaseRNAseq_e10.5_Neural Epithelium Overlying Central Eminence_top-relative-expression-ranked_2500_k-means-cluster#4	FaceBase_RNAseq	5.944e-06	0.0233	4.031e-05	0.0003568	26	457	PDE4D,ACTG2,ADCY2,MARCHF4,KIF17,COL6A3,MRAS,CHODL,TNC,SGCD,IGFBP7,DLL3,DKK3,INHBA,GAS2,P4HA3,C11orf87,SLFN5,PDE10A,FBXL7,CCDC3,NT5E,THBS2,LMNA,LTBP2,HSD17B14
Coexpression	MM948	PLASARI_TGFB1_SIGNALING_VIA_NFIC_10HR_UP	M2:CGP: Chemical and Genetic Perturbations	5.967e-06	0.05563	0.0001472	0.00143	8	57	NREP,CHODL,RGS5,MYH11,AIF1L,NFIB,NNAT,RGS4
Coexpression Atlas	gudmap_kidney_e10.5_UretericTip_HoxB7_1000	kidney_e10.5_UretericTip_HoxB7_top-relative-expression-ranked_1000	Gudmap Mouse MOE430.2	5.987e-06	0.02347	4.053e-05	0.0003587	37	787	RCBTB2,HMMR,FBN2,MEX3A,CLCN5,ANLN,PGAP1,RAD54B,ALDH1A3,FHL1,SOSTDC1,CCDC80,STIL,CRABP2,ARHGDIB,MOXD1,DKK1,IL17RD,SNRPN,GATA3,TUBB2B,FJX1,ZC4H2,MELK,MEMO1,SYT11,BUB1,KCNMB4,ST8SIA4,CDCA8,TFAP2A,LPAR1,SLC7A8,SEMA3D,HMCN1,AADAT,TPBG
Coexpression Atlas	gudmap_dev gonad_e13.5_M_gudmap_devVasTestis_Flk_500	dev gonad_e13.5_M_DevVasTestis_Flk_top-relative-expression-ranked_500	Gudmap Mouse ST 1.0	6.179e-06	0.02422	4.176e-05	0.0003696	25	430	RAMP2,RHOJ,MCAM,RFTN2,ARHGAP31,ARHGAP29,COL4A1,JCAD,SFRP1,CDC42EP3,CRIP2,ARHGDIB,IGFBP7,CYYR1,LIMCH1,INHBA,DOCK11,SLFN5,ST8SIA4,UACA,PLXDC1,LCP1,SLC7A8,TJP1,PAK3
Coexpression	M39300	CUI_DEVELOPING_HEART_C3_FIBROBLAST_LIKE_CELL	C8: Cell Type Signature	6.207e-06	0.05786	0.0001527	0.001483	11	117	LTBP4,COL6A3,COL12A1,AKAP12,MOXD1,IGFBP7,CCN2,OLFML1,NRK,SGCE,THBS2
Coexpression Atlas	endometrium	endometrium	Human Protein Atlas	6.224e-06	0.0244	4.2e-05	0.0003717	12	115	ASIC2,TRPC4,MEX3A,HOXD11,MMP11,WT1,SLITRK3,MOXD1,DCHS2,INHBA,GAS1,MEIS3
Coexpression	M18095	GAUSSMANN_MLL_AF4_FUSION_TARGETS_G_UP	C2:CGP: Chemical and Genetic Perturbations	6.228e-06	0.05806	0.0001528	0.001485	16	244	ACTA2,FBN2,CLCN5,ANLN,CHODL,SESN3,CRMP1,SCUBE2,NSG1,PRKG1,PCDHB5,CYRIA,SYT11,NFIB,EGR2,EPB41
Coexpression	M45713	HE_LIM_SUN_FETAL_LUNG_C1_SMG_CELL	C8: Cell Type Signature	6.34e-06	0.0591	0.0001551	0.001507	32	776	TTYH1,MCC,TRIM29,REEP2,ALDH1A3,SLITRK6,FOXC1,KLF11,SFRP1,MRAS,PODXL,SOSTDC1,ARHGDIB,LYPD3,GLIPR2,HTRA1,INHBA,GBP1,NECTIN1,MAFB,WNK2,KRT7,UACA,DUSP4,ZBTB8A,GAL3ST4,TFAP2A,SOX21,FRMD6,SERTAD4,TNFAIP2,TPBG
GO: Biological Process	GO:0072006	nephron development		6.511e-06	0.03728	0.0003766	0.003476	18	245	ACTA2,HOXD11,ANLN,UPK3A,FOXC1,FOXC2,PODXL,WT1,OSR1,CTNS,SERPINB7,DCHS2,GATA3,SULF1,MAFB,TFAP2A,EDNRA,GREM1
Coexpression Atlas	gudmap_developingKidney_e15.5_Podocyte cells_100	DevelopingKidney_e15.5_Podocyte cells_emap-27915_top-relative-expression-ranked_100	Gudmap Mouse MOE430.2	6.579e-06	0.02579	4.417e-05	0.000391	10	79	EYA4,ACTG2,CNTN1,FOXC2,COL9A1,PODXL,WT1,MYH11,MAFB,TBX18
Coexpression Atlas	gudmap_kidney_adult_Mesangium_Meis_k3_1000	kidney_adult_Mesangium_Meis_k-means-cluster#3_top-relative-expression-ranked_1000	Gudmap Mouse MOE430.2	6.579e-06	0.02579	4.417e-05	0.000391	10	79	TPM2,ACTA2,FHL1,PLN,RGS5,SNCG,MYH11,KCNMB1,EDNRA,SLC7A8
Coexpression Atlas	Facebase_RNAseq_e10.5_Neural Epithelium Overlying Medial Eminence_2500_K5	FacebaseRNAseq_e10.5_Neural Epithelium Overlying Medial Eminence_top-relative-expression-ranked_2500_k-means-cluster#5	FaceBase_RNAseq	6.594e-06	0.02585	4.417e-05	0.000391	22	350	TTYH1,MAP2,TENM2,TUBB3,PCDH10,MGAT5B,DPYSL4,POU3F1,CRMP1,RND3,DLL3,DCX,SYT11,STMN3,NTM,NNAT,WNK2,DDR1,DTNA,GAL3ST4,IFT52,TOX2
Coexpression Atlas	gudmap_dev lower uro neuro_e15.5_BladdPelvicGanglion_Sox10_k2_100	dev lower uro neuro_e15.5_BladdPelvicGanglion_Sox10_k-means-cluster#2_top-relative-expression-ranked_100	Gudmap Mouse ST 1.0	6.594e-06	0.02585	4.417e-05	0.000391	6	23	GATA3,SYT11,SYT1,DPYSL3,RGS4,INA
Coexpression Atlas	Facebase_RNAseq_e8.5_Non-Floor Plate Neural Epithelium_1000_K4	FacebaseRNAseq_e8.5_Non-Floor Plate Neural Epithelium_top-relative-expression-ranked_1000_k-means-cluster#4	FaceBase_RNAseq	6.603e-06	0.02589	4.417e-05	0.000391	20	298	ADCY2,SLITRK6,COL6A3,CHODL,TNC,SP110,IGFBP7,OSR1,ATP2B4,DKK2,INHBA,P4HA3,COL24A1,OLFML1,NFIB,NRK,CCDC3,CACNA1C,KRT7,THBS2
GO: Biological Process	GO:0051130	positive regulation of cellular component organization		6.634e-06	0.03799	0.0003799	0.003506	56	1411	TPM1,EPHB2,ASIC2,TENM2,PICALM,CNOT6,FZD1,PROM2,ANLN,SLITRK6,MAP4K4,SDC1,MEX3B,CNTN1,FOXC2,ISLR2,BIN1,SFRP1,FN1,CHODL,TNC,WNT7A,SLITRK3,STIL,CRABP2,CDC42EP3,SH2B1,LRRN3,ISG15,CCN2,LIMCH1,CCP110,DOCK11,GATA2,GBP1,TUBB2B,DCX,NEFL,SYT1,KIF3C,GPC2,DDHD2,WASF1,DDR1,DPYSL3,LCP1,LPAR1,GSK3B,TGFB2,THBS2,KATNBL1,PAK3,GREM1,PHLDB2,TPBG,EPHA3
Coexpression	M2784	MEL18_DN.V1_UP	C6: Oncogenic Signature	6.671e-06	0.06218	0.0001628	0.001582	12	141	CPA4,LTBP4,COL13A1,ADAM19,INHBA,FJX1,PTHLH,NT5E,LCP1,TGFB2,SLC7A5,GREM1
Coexpression Atlas	GSM777043_100	Stromal Cells, Fi.MTS15+.Th, CD45- PDGFRa+ MTS15+, Thymus, avg-3	Immgen.org, GSE15907	6.767e-06	0.02652	4.511e-05	0.0003993	11	97	RHOJ,ARHGAP29,LTBP4,COL6A3,CCDC80,POSTN,IGFBP7,HTRA1,BGN,NFIB,DPYSL3
Coexpression Atlas	GSM777046_100	Stromal Cells, Fi.Sk, gp38+ CD140a+, Skin, avg-4	Immgen.org, GSE15907	6.767e-06	0.02652	4.511e-05	0.0003993	11	97	PENK,COL6A3,FN1,OLFML2B,CCDC80,CRIP2,POSTN,IGFBP7,HTRA1,BGN,NFIB
Coexpression	MM893	BRUINS_UVC_RESPONSE_VIA_TP53_GROUP_A	M2:CGP: Chemical and Genetic Perturbations	6.809e-06	0.06347	0.0001651	0.001604	36	930	TRAF5,ASIC2,ACTA2,TENM2,TUBB4A,CSRNP3,SEMA5B,FKBP1A,CNN1,CNTN1,FOXC1,COL13A1,CHODL,TNC,RND3,LRRN3,NKD1,DKK1,LYPD3,GLIPR2,DKK3,PRSS2,GATA3,LAMP5,SULT1E1,NTM,IFI44L,NNAT,DDR1,ADAMTS8,CBFA2T3,EDNRA,EGR2,GREM1,LAS1L,SENP7
Coexpression Atlas	gudmap_dev lower uro neuro_e14.5_BladdPelvicGanglion_Sox10_k2_500	dev lower uro neuro_e14.5_BladdPelvicGanglion_Sox10_k-means-cluster#2_top-relative-expression-ranked_500	Gudmap Mouse ST 1.0	6.811e-06	0.0267	4.533e-05	0.0004012	12	116	CRMP1,NSG1,SNRPN,GATA3,TUBB2B,SEPTIN6,NEFL,SYT11,NNAT,DPYSL3,RGS4,INA
Coexpression	M2452	PLASARI_TGFB1_SIGNALING_VIA_NFIC_10HR_UP	C2:CGP: Chemical and Genetic Perturbations	6.818e-06	0.06356	0.0001651	0.001604	8	58	NREP,CHODL,RGS5,MYH11,AIF1L,NFIB,NNAT,RGS4
Coexpression	M3447	AMIT_SERUM_RESPONSE_60_MCF10A	C2:CGP: Chemical and Genetic Perturbations	6.818e-06	0.06356	0.0001651	0.001604	8	58	VGLL3,FN1,TNC,CCN2,INHBA,GAS1,MAFB,CALD1
Coexpression	M41711	FAN_OVARY_CL9_PUTATIVE_APOPTOTIC_ENDOTHELIAL_CELL	C8: Cell Type Signature	6.863e-06	0.06398	0.0001658	0.001611	20	365	HLX,PICALM,ARHGAP29,FKBP1A,HSPA2,PLS3,IFIT1,CDC42EP3,CRIP2,IGFBP7,ISG15,CCN2,IFI6,GBP1,NFIB,IFI44L,SASH1,LMNA,PLEKHO1,SMAD1
Coexpression	M15535	KIM_WT1_TARGETS_12HR_UP	C2:CGP: Chemical and Genetic Perturbations	6.93e-06	0.0646	0.0001669	0.001622	13	166	MYL9,PODXL,WT1,IFIT1,CDC42EP3,ATP2B4,HTRA1,MYLK,SYNC,KIF3C,DDR1,PLEKHO1,RBFOX2
Coexpression Atlas	gudmap_developingGonad_e11.5_testes and mesonephros_k1_1000	DevelopingGonad_e11.5_testes and mesonephros_emap-3226_k-means-cluster#1_top-relative-expression-ranked_1000	Gudmap Mouse MOE430.2	6.956e-06	0.02727	4.621e-05	0.0004091	9	63	HLX,MEX3B,FOXC1,FOXC2,COL9A1,SFSWAP,RGS5,NFIB,GSK3B
Coexpression Atlas	PCBC_ratio_SC_vs_DE_cfr-2X-p05	Pluripotent Stem Cells_vs_Endoderm Differentiated Cells-Confounder_removed-fold2.0_adjp0.05	PCBC_AltAnalyze	7.172e-06	0.02812	4.757e-05	0.0004211	24	406	IGSF8,TTYH1,RAMP2,TRIM22,CPT1C,FHL1,PCYT1B,SESN3,RND3,NSG1,IFI6,MIAT,FAM131B,TCEAL7,BRINP1,NECTIN1,ARHGEF9,SYT1,NKAIN1,DPYSL3,SLC7A8,THBS2,SOX21,VASH2
Coexpression	M4491	CROONQUIST_NRAS_VS_STROMAL_STIMULATION_DN	C2:CGP: Chemical and Genetic Perturbations	7.197e-06	0.06709	0.0001729	0.00168	10	97	TPM2,ACTA2,COL6A3,POSTN,IGFBP7,CCN2,SULF1,TSC22D3,STMN1,THBS2
Coexpression Atlas	Facebase_RNAseq_ratio_e9.5_MaxillaryArch_vs_Mandibular_2500_K1	FacebaseRNAseq_ratio_e9.5_MaxillaryArch_vs_Mandibular_top-relative-expression-ranked_2500_k-means-cluster#1	FaceBase_RNAseq	7.211e-06	0.02827	4.775e-05	0.0004226	26	462	PDE4D,ACTG2,ADCY2,MARCHF4,KIF17,COL6A3,MRAS,CHODL,TNC,SGCD,IGFBP7,DLL3,DKK3,INHBA,GAS2,P4HA3,C11orf87,LAMP5,SLFN5,PDE10A,FBXL7,CCDC3,NT5E,THBS2,LTBP2,HSD17B14
Coexpression Atlas	gudmap_developingGonad_e11.5_testes and mesonephros_k1_100	DevelopingGonad_e11.5_testes and mesonephros_emap-3226_k-means-cluster#1_top-relative-expression-ranked_100	Gudmap Mouse MOE430.2	7.223e-06	0.02831	4.775e-05	0.0004226	5	14	TUBB3,SNRPN,TUBB2B,NEFL,PCBP4
[truncated: 2,849 more rows]

## Sheet: UP in WT for TOPPFUN
H19
PCDHB5
MYH11
CRMP1
MYLK
DCX
SEMA5B
ASTN2
TAF1C
NSG1
GRIN3A
NBPF15
ACTR3B
[truncated: 441 more rows]
