# Supplementary material for: SMAD1 Is Dispensable for CDX2 Induction but Required for the Repression of Ectopic Small-Intestinal Gene Expression in Human-Pluripotent-Stem-Cell-Derived Colonic Organoids
Source: MDPI journal article supplement (doi:10.3390/organoids2040015), 2023-11-14
Supplement: s1 [file s1 › Supplementary Table S3. UP in SMAD1 KO co-expression analysis.xlsx]

## Sheet: UP in SMAD1 KO with co-expressi
Category	ID	Name	Source	p-value	q-value Bonferroni	q-value FDR B&H	q-value FDR B&Y	Hit Count in Query List	Hit Count in Genome	Hit in Query List
Coexpression Atlas	small intestine	small intestine	Human Protein Atlas	9.69e-82	3.94e-78	3.94e-78	3.5e-77	107	339	LRRC66,CDX1,CDX2,AOC1,ABO,GCNT3,B3GALT5,CYP2S1,FOXA3,HNF4A,HNF4G,FABP1,MEP1A,MUC17,PRELID2,NPC1L1,ABCG2,SMPD3,DEGS2,ABCC2,SLC51A,ALDOB,PLS1,BAIAP2L2,ALPI,MGAM2,VIL1,BNIP5,RNF186,ANPEP,MOGAT2,DHRS11,FLVCR1,TMEM253,HKDC1,ISX,SLC39A4,APOA1,APOA4,APOB,CLDN3,XPNPEP2,MUC13,SLC1A1,SLC51B,GDA,MISP,SLC9A3,LRRC19,TMEM45B,SLC15A1,UNC5CL,MTTP,C1QTNF12,C11orf86,SDCBP2,MUC3A,URAD,MOGAT3,DGAT1,TJP3,ANO9,MYO1A,M…
Coexpression Atlas	duodenum	duodenum	Human Protein Atlas	1.02e-80	4.13e-77	2.07e-77	1.84e-76	104	321	LRRC66,CDX1,CDX2,B3GALT5,CYP2S1,FOXA3,HNF4A,HNF4G,FABP1,MEP1A,MUC17,NPC1L1,SMPD3,ABCC2,SLC51A,ALDOB,GLTPD2,PLS1,LRRC75A,BAIAP2L2,ALPI,MGAM2,VIL1,BNIP5,RNF186,ANPEP,MOGAT2,DHRS11,TMEM253,PRR15L,HKDC1,ISX,SLC39A4,APOA4,APOB,TMC4,XPNPEP2,MUC13,SLC51B,GDA,MISP,AATK,LRRC19,TMEM45B,SLC15A1,UNC5CL,MTTP,FUT2,C1QTNF12,C11orf86,SDCBP2,MUC3A,URAD,MOGAT3,DGAT1,TJP3,ANO9,MYO1A,MYO7B,CYP3A5,CDHR2,PDX1,FAM83E,C…
Coexpression Atlas	PCBC_ratio_MESO-15_vs_MESO-5_cfr-2X-p05	Mesoderm Day 15_vs_Mesoderm Day 5-Confounder_removed-fold2.0_adjp0.05	PCBC_AltAnalyze	8.09e-78	3.29e-74	1.1e-74	9.75e-74	166	1049	TSPAN15,EPHX2,PCSK5,HGD,HDHD3,ERBB3,TMEM144,CDX2,HK2,SLCO2B1,ENPP2,CHDH,SERPINF1,GOLM1,CYP2S1,PFKP,F2,HNF4A,FABP1,CKB,MEP1A,S100A6,HAVCR1,SIAE,SERPINA1,SERPINA4,CAMK2N1,NDRG1,FCGRT,SH3RF2,SCD,HPN,AGT,PRR13,CGN,FGB,AK4,ABCC2,PLG,SLC51A,SERPINF2,GLTPD2,MUC20,VIL1,SELENOP,VTN,ANG,ANPEP,UBD,ANXA4,DHRS11,AGPAT2,MYO18A,HKDC1,CXCL14,APOA1,APOA2,APOA4,APOB,TMC4,PPARA,TDP2,ABCC6,SEMA4G,SLC3A1,HAPLN1,LPIN3…
Coexpression Atlas	PCBC_ratio_MESO-15 blastocyst_vs_MESO-15 amniotic fluid MSC_cfr-2X-p05	MESO-15 blastocyst_vs_MESO-15 amniotic fluid MSC-Confounder_removed-fold2.0_adjp0.05	PCBC_AltAnalyze	2.29e-74	9.32e-71	2.33e-71	2.07e-70	140	751	PCSK5,HGD,HDHD3,CDX2,SLCO2B1,CHDH,WIPF3,TMEM176A,CYP2S1,HNF4A,MYORG,FABP1,CKB,MEP1A,HAVCR1,SIAE,SERPINA1,NDRG1,FCGRT,SH3RF2,SCD,AGT,PRR13,FGB,AK4,ABCC2,PLG,SLC51A,RBM47,GLTPD2,MUC20,VIL1,SELENOP,VTN,ANG,ANPEP,CORO2A,ANXA4,DHRS11,AGPAT2,HKDC1,APOA1,APOA2,APOA4,APOB,TMC4,CLDN3,XPNPEP2,SLC1A1,TDP2,ABCC6,ZFP36,SEMA4G,LPIN3,TXNIP,MST1,IGF2,SLC17A9,ASL,FRZB,TMEM37,MTTP,RAB11FIP5,PRKCD,PCP4L1,IGSF1,SDCB…
Coexpression	M40029	BUSSLINGER_DUODENAL_MATURE_ENTEROCYTES	C8: Cell Type Signature	2.17e-73	2.09e-69	2.09e-69	2.03e-68	85	259	AOC1,ACHE,CARD10,MGLL,CYP2S1,PFKP,KLF4,S100A6,SERPINA1,CAMK2N1,MUC17,NPC1L1,CGN,SCNN1A,ABCG2,SMPD3,ABCC2,ALDOB,GLTPD2,PLS1,BAIAP2L2,SLC9A3-OT1,ALPI,VEGFA,FLNB,SELENOP,ANPEP,FLVCR1,AGPAT2,TMEM253,HKDC1,SLC39A4,APOA1,APOA4,APOB,XPNPEP2,MUC13,SLC6A8,MISP,AATK,SLC15A1,CIDEC,MTTP,MAPK3,ARHGAP27,C1QTNF12,C11orf86,IL6R,DGAT1,ACSL5,CIDEB,ABCC3,SLC36A1,MYO1A,MYO7B,CYP3A5,CDHR2,ABHD3,CEACAM6,CDHR5,SLC46A1,…
Coexpression Atlas	gudmap_developingKidney_e15.5_early proxim tubul_1000	DevelopingKidney_e15.5_early proxim tubul_emap-28005_top-relative-expression-ranked_1000	Gudmap Mouse MOE430.2	6.87e-70	2.8e-66	5.59e-67	4.97e-66	138	784	EPHX2,HGD,ERBB3,TMEM144,AOC1,HLA-DMA,HLA-DMB,SLCO2B1,CHDH,TMEM176A,B3GALT5,CYP2S1,F2,HNF4A,TTR,MEP1A,PLEKHH1,SERPINA1,TFCP2L1,CAMK2N1,NDRG1,CLIC5,FCGRT,AFP,HPN,FGB,UGT8,ABCC2,SLC51A,SERPINF2,ALDOB,RBM47,VIL1,BNIP5,TMEM176B,ANPEP,MOGAT2,AGPAT2,PRR15L,SLC39A4,APOA1,APOA2,APOA4,APOB,TMC4,CLDN3,CLDN7,XPNPEP2,MUC13,CDCP1,SLC1A1,SLC3A1,SLC51B,MISP,TMEM45B,UNC5CL,SLCO2A1,TMEM37,CCDC68,MTTP,ATP1A1,OCLN,C…
Coexpression	M40212	DESCARTES_FETAL_INTESTINE_INTESTINAL_EPITHELIAL_CELLS	C8: Cell Type Signature	4.21e-69	4.05e-65	2.03e-65	1.98e-64	84	278	HDHD3,CDX1,WIPF3,FABP1,MEP1A,SERPINA4,MUC17,SH3RF2,AFP,AGT,MIR194-2HG,DEGS2,ABCC2,SLC51A,ALDOB,GLTPD2,ALPI,MGAM2,VIPR1,ANPEP,MOGAT2,ANXA4,TMEM253,HKDC1,SLC39A4,APOA1,APOA2,APOA4,APOB,FADS6,XPNPEP2,MUC13,SLC1A1,SEMA4G,SLC51B,GDA,SLC9A3,LRRC19,TMEM45B,RHPN2,UNC5CL,CIDEC,MTTP,RASEF,C11orf86,MOGAT3,DGAT1,ACSL5,TJP3,PRSS3,MASP1,PRSS8,CYP3A5,GDPD2,ATP10B,PBLD,GCHFR,NAGS,ITPKA,GJB1,TINAG,SULT1B1,NR1I2,T…
Coexpression Atlas	PCBC_ratio_MESO-15_vs_SC_cfr-2X-p05	Mesoderm Day 15_vs_Pluripotent Stem Cells-Confounder_removed-fold2.0_adjp0.05	PCBC_AltAnalyze	2.73e-63	1.11e-59	1.86e-60	1.65e-59	186	1648	EPHX2,PCSK5,HGD,HDHD3,ERBB3,TMEM144,CDX2,LMNTD2-AS1,SLCO2B1,ENPP2,TLCD4,CHDH,SERPINF1,F2,HNF4A,F3,PLAC8,MYORG,FABP1,CKB,MEP1A,S100A6,HAVCR1,SIAE,SERPINA1,SERPINA4,MGAT3,CAMK2N1,NDRG1,FCGRT,SH3RF2,HPN,AGT,PRR13,CGN,FGB,AK4,ABCC2,PLG,SLC51A,SERPINF2,GLTPD2,PLOD2,MUC20,VEGFA,VIL1,FLNB,SELENOP,VTN,ANG,ANPEP,CORO2A,UBD,ANXA4,DHRS11,AGPAT2,CAMSAP3,HKDC1,LMNTD2,CXCL14,APOA1,APOA2,APOA4,APOB,TMC4,CLDN3,P…
Coexpression Atlas	PCBC_ratio_MESO-30 blastocyst_vs_MESO-30 amniotic fluid MSC_cfr-2X-p05	MESO-30 blastocyst_vs_MESO-30 amniotic fluid MSC-Confounder_removed-fold2.0_adjp0.05	PCBC_AltAnalyze	4.62e-63	1.88e-59	2.21e-60	1.96e-59	129	761	TSPAN15,PCSK5,HGD,ERBB3,CDX2,CHDH,TMEM176A,CYP2S1,FOXA3,F2,HNF4A,ME1,F3,PLAC8,MYORG,FABP1,MEP1A,S100A6,HAVCR1,SIAE,MELTF,SERPINA1,SERPINA4,CAMK2N1,FCGRT,HPN,AGT,PRR13,FGB,PLAUR,CCL20,PLG,RBM47,GLTPD2,DUOXA2,VIL1,FLNB,BNIP5,SELENOP,VTN,ANG,TMEM176B,ANPEP,UBD,ANXA4,HKDC1,DUOX2,APOA1,APOA2,APOA4,APOB,TMC4,CLDN7,BHLHE40,SLC1A1,ZFP36,HAPLN1,TXNIP,LSR,IGF2,UNC5CL,FRZB,MTTP,RAB11FIP5,ATF3,IGSF1,OCLN,ATP…
Coexpression Atlas	PCBC_ratio_MESO-30_from-ESC_vs_MESO-30_from-plasmid_cfr-2X-p05	Mesoderm Day 30-method_NA_vs_Mesoderm Day 30-method_plasmid-Confounder_removed-fold2.0_adjp0.05	PCBC_AltAnalyze	5.42e-63	2.21e-59	2.21e-60	1.96e-59	95	371	TSPAN15,PCSK5,HGD,ERBB3,ENPP2,CHDH,SERPINF1,CYP2S1,FOXA3,HNF4A,F3,PLAC8,MYORG,FABP1,HAVCR1,SERPINA1,SERPINA4,SCD,HPN,AGT,CGN,FGB,CCL20,PLG,SERPINF2,GLTPD2,VEGFA,DUOXA2,VIL1,SELENOP,VTN,ANG,ANPEP,UBD,ANXA4,DHRS11,AGPAT2,CAMSAP3,HKDC1,DUOX2,CP,APOA1,APOA2,APOA4,APOB,TMC4,CLDN3,CLDN7,SEMA4G,MST1,IGF2,RHPN2,UNC5CL,FRZB,TMEM37,MTTP,IGSF1,OCLN,SDCBP2,URAD,IL2RG,TJP3,CAPN12,PECR,PRSS8,IQGAP2,ABHD3,GCHFR…
Coexpression Atlas	PCBC_ratio_MESO-30_from-ESC_vs_MESO-30_from-OSKM - NLT_cfr-2X-p05	Mesoderm Day 30-reprogram_NA_vs_Mesoderm Day 30-reprogram_OSKM - NLT-Confounder_removed-fold2.0_adjp0.05	PCBC_AltAnalyze	5.42e-63	2.21e-59	2.21e-60	1.96e-59	95	371	TSPAN15,PCSK5,HGD,ERBB3,ENPP2,CHDH,SERPINF1,CYP2S1,FOXA3,HNF4A,F3,PLAC8,MYORG,FABP1,HAVCR1,SERPINA1,SERPINA4,SCD,HPN,AGT,CGN,FGB,CCL20,PLG,SERPINF2,GLTPD2,VEGFA,DUOXA2,VIL1,SELENOP,VTN,ANG,ANPEP,UBD,ANXA4,DHRS11,AGPAT2,CAMSAP3,HKDC1,DUOX2,CP,APOA1,APOA2,APOA4,APOB,TMC4,CLDN3,CLDN7,SEMA4G,MST1,IGF2,RHPN2,UNC5CL,FRZB,TMEM37,MTTP,IGSF1,OCLN,SDCBP2,URAD,IL2RG,TJP3,CAPN12,PECR,PRSS8,IQGAP2,ABHD3,GCHFR…
Coexpression Atlas	PCBC_ratio_MESO-30 blastocyst_vs_MESO-30 fibroblast_cfr-2X-p05	MESO-30 blastocyst_vs_MESO-30 fibroblast-Confounder_removed-fold2.0_adjp0.05	PCBC_AltAnalyze	5.42e-63	2.21e-59	2.21e-60	1.96e-59	95	371	TSPAN15,PCSK5,HGD,ERBB3,ENPP2,CHDH,SERPINF1,CYP2S1,FOXA3,HNF4A,F3,PLAC8,MYORG,FABP1,HAVCR1,SERPINA1,SERPINA4,SCD,HPN,AGT,CGN,FGB,CCL20,PLG,SERPINF2,GLTPD2,VEGFA,DUOXA2,VIL1,SELENOP,VTN,ANG,ANPEP,UBD,ANXA4,DHRS11,AGPAT2,CAMSAP3,HKDC1,DUOX2,CP,APOA1,APOA2,APOA4,APOB,TMC4,CLDN3,CLDN7,SEMA4G,MST1,IGF2,RHPN2,UNC5CL,FRZB,TMEM37,MTTP,IGSF1,OCLN,SDCBP2,URAD,IL2RG,TJP3,CAPN12,PECR,PRSS8,IQGAP2,ABHD3,GCHFR…
Coexpression Atlas	gudmap_developingKidney_e15.5_early proxim tubul_500	DevelopingKidney_e15.5_early proxim tubul_emap-28005_top-relative-expression-ranked_500	Gudmap Mouse MOE430.2	4.4e-55	1.79e-51	1.63e-52	1.45e-51	90	393	HGD,HLA-DMA,HLA-DMB,CHDH,B3GALT5,F2,HNF4A,TTR,MEP1A,PLEKHH1,SERPINA1,NDRG1,CLIC5,AFP,HPN,FGB,UGT8,ABCC2,SLC51A,SERPINF2,ALDOB,RBM47,VIL1,BNIP5,ANPEP,MOGAT2,SLC39A4,APOA1,APOA2,APOA4,APOB,CLDN3,CLDN7,SLC1A1,SLC3A1,SLC51B,MISP,TMEM45B,UNC5CL,SLCO2A1,TMEM37,FXYD2,CIDEB,PRSS8,CDHR2,PAQR5,KIF12,PBLD,GCNT1,ANKS4B,STEAP2,CFB,GGT1,APOM,TINAG,CLRN3,SEMA3B,CALML4,SLC39A5,SLC27A2,NPNT,CA12,DPEP1,DPP4,RAB17,…
Coexpression Atlas	gudmap_kidney_adult_JuxtaGlom_Ren1_1000	kidney_adult_JuxtaGlom_Ren1_top-relative-expression-ranked_1000	Gudmap Mouse MOE430.2	1.75e-52	7.13e-49	5.94e-50	5.28e-49	120	800	HEXB,EPHX2,HGD,LRRC66,ENPP1,ENPP2,TMEM176A,MGLL,PFKP,HNF4A,ME1,SQOR,TUBA4A,MEP1A,TFCP2L1,NDRG1,CLIC5,FCGRT,SCNN1A,UGT8,AK4,ABCG2,DEGS2,ABCC2,SLC51A,SERPINF2,ALDOB,RBM47,PLS1,VIL1,SELENOP,TMEM176B,ANPEP,PRXL2B,AOAH,SGPP2,APOA2,APOB,CPT1A,SLC1A1,SLC3A1,SLC51B,TXNIP,SLC6A8,SLC9A3,LRRC19,TMEM45B,SLCO2A1,ASL,SLC22A5,TMEM37,PCP4L1,ATP1A1,ATP1B1,FXYD2,SORL1,CIDEB,PECR,PRSS8,SLC36A1,GALNT3,MYO1D,IQGAP2,M…
Coexpression	M40301	DESCARTES_FETAL_STOMACH_MUC13_DMBT1_POSITIVE_CELLS	C8: Cell Type Signature	1.99e-50	1.92e-46	6.39e-47	6.23e-46	47	97	LRRC66,CDX1,GCNT3,MEP1A,MELTF,MUC17,MIR194-2HG,ALDOB,BAIAP2L2,MGAM2,VIPR1,MOGAT2,HKDC1,ISX,APOA1,APOA4,APOB,MUC13,GDA,SLC15A1,MTTP,MUC3A,ACSL5,PRSS3,MYO7B,CDHR2,GDPD2,CDHR5,ANKS4B,NR1I2,FZD5,EPS8L3,CREB3L3,DMBT1,PHGR1,SLC26A3,AMN,SLC19A3,SLC17A4,TRIM31,LGALS4,ACE2,ABCC6P1,MALRD1,GUCY2C,GPA33,CDH17
Coexpression	M39173	MURARO_PANCREAS_DUCTAL_CELL	C8: Cell Type Signature	5.59e-48	5.38e-44	1.34e-44	1.31e-43	131	1276	HEXB,TSPAN15,PCSK5,HDHD3,ERBB3,CDX2,CEACAM5,GCNT3,HLA-DMA,HLA-DMB,CEACAM7,GOLM1,ATP8B1,PFKP,LRG1,POF1B,S100A6,SIAE,MELTF,SERPINA1,MTUS1,HPCAL1,AGT,PRR13,SCNN1A,PLAUR,MMP7,CCL20,RBM47,CXCL5,PLS1,MUC20,UBD,KIAA1522,PRXL2B,ERO1A,FA2H,ANXA4,PRR15L,HKDC1,DUOX2,TMC4,CLDN7,MUC13,CPT1A,BHLHE40,SLC1A1,ZFP36,SLC3A1,TXNIP,SLC15A1,RHPN2,RASEF,ATF3,CTNNA1,ATP1A1,OCLN,ATP1B1,MUC1,PRDM16,CTSS,CXADR,ABCC3,GALNT3…
Coexpression Atlas	gudmap_kidney_adult_RenalCortexMixed_Std_1000	kidney_adult_RenalCortexMixed_Std_top-relative-expression-ranked_1000	Gudmap Mouse MOE430.2	2.32e-47	9.45e-44	7.27e-45	6.46e-44	118	861	HEXB,EPHX2,HGD,LRRC66,ENPP1,ENPP2,TLCD4,MGAT4A,TMEM176A,HNF4A,ME1,SQOR,TTR,TUBA4A,PLAC8,MEP1A,SERPINA1,TFCP2L1,NDRG1,CLIC5,HOOK1,SCD,SCNN1A,UGT8,AK4,ABCG2,DEGS2,ABCC2,SLC51A,ALDOB,RBM47,PLS1,VIL1,SELENOP,TMEM176B,ANPEP,PRXL2B,AOAH,CP,APOA2,APOB,SLC1A1,SLC3A1,SLC51B,SLC9A3,LRRC19,TMEM45B,ASL,SLC22A5,CCDC68,ATP1B1,FXYD2,CIDEB,PECR,PRSS8,GALNT3,IQGAP2,MYO6,TNFSF10,ABHD3,GATM,PAQR5,PBLD,CDHR5,GCNT1,A…
Coexpression Atlas	colon	colon	Human Protein Atlas	5.58e-47	2.27e-43	1.62e-44	1.44e-43	57	159	CDX1,CDX2,CEACAM5,GCNT3,CEACAM7,B3GALT5,FOXA3,HNF4A,FAM3D,FABP1,MEP1A,HAVCR1,FXYD3,FOXD2,VIL1,MOGAT2,DHRS11,ISX,CLDN3,MUC13,MISP,SLC9A3,LRRC19,C15orf48,URAD,MUC4,MOGAT3,MYO1A,CEACAM6,ATP10B,CDHR5,IL22RA1,CEACAM1,SULT1B1,NR1I2,CLRN3,EPS8L3,PHGR1,SLC39A5,CA2,TRIM15,SLC26A3,AMN,SLC26A2,SLC17A4,TRIM31,MUC12,LGALS4,TFF3,HHLA2,EFNA2,GUCY2C,TSPAN8,PADI2,GPA33,ENTPD8,CDH17
Coexpression	M40234	DESCARTES_FETAL_LIVER_HEPATOBLASTS	C8: Cell Type Signature	1.83e-45	1.76e-41	3.52e-42	3.43e-41	83	505	HGD,ERBB3,ENPP1,CHDH,SERPINF1,F2,HNF4A,HNF4G,TTR,MYORG,FABP1,MEP1A,SERPINA1,SERPINA4,CAMK2N1,AFP,SCD,HPN,AGT,NPC1L1,FGB,AK4,ABCC2,PLG,SERPINF2,ALDOB,GLTPD2,VIL1,VTN,ANG,ANPEP,EPB41L4B,MOGAT2,CAMSAP3,HKDC1,CP,APOA1,APOA2,APOA4,APOB,FADS6,XPNPEP2,ABCC6,SEMA4G,SLC15A1,MTTP,IGSF1,FXYD2,MOGAT3,TJP3,CAPN12,PECR,CYP3A5,KIF12,PBLD,CDHR5,ANKS4B,STEAP2,ELOVL2,ITIH2,CFB,APOM,GJB1,MARVELD3,CREB3L3,SLC39A5,SL…
Coexpression Atlas	gudmap_developingKidney_e15.5_Proximal Tubules_1000	DevelopingKidney_e15.5_Proximal Tubules_emap-28005_top-relative-expression-ranked_1000	Gudmap Mouse MOE430.2	5.01e-44	2.04e-40	1.36e-41	1.21e-40	107	758	HGD,RGMB,ERBB3,TMEM144,HLA-DMB,ENPP2,CHDH,MGAT4A,B3GALT5,HNF4A,TUBA4A,MEP1A,PLEKHH1,SERPINA1,TFCP2L1,CAMK2N1,NDRG1,CLIC5,HOOK1,AFP,HPN,UGT8,ABCC2,SERPINF2,ALDOB,RBM47,PLS1,VEGFA,USP53,VIL1,AOAH,SGPP2,CDCP1,SLC1A1,SLC3A1,SLC51B,TMEM45B,UNC5CL,SLCO2A1,FRZB,SLC22A5,CCDC68,OCLN,ATP1B1,FXYD2,SORL1,CIDEB,ANO9,PRSS8,GALNT3,MYO6,CDHR2,TMEM135,ABHD3,PAQR5,KIF12,PBLD,GCNT1,ACSS2,ANKS4B,STEAP2,ELOVL2,CFB,GG…
Coexpression Atlas	rectum	rectum	Human Protein Atlas	7.11e-43	2.9e-39	1.81e-40	1.61e-39	55	168	CDX1,CDX2,CEACAM5,GCNT3,CEACAM7,B3GALT5,FOXA3,HNF4A,FAM3D,FER1L6,FABP1,MEP1A,HAVCR1,FXYD3,FOXD2,VIL1,MOGAT2,DHRS11,ISX,TMPRSS4,MUC13,SEMA4G,MISP,LRRC19,C15orf48,MOGAT3,MYO1A,CEACAM6,ATP10B,CDHR5,ANKS4B,IL22RA1,CEACAM1,SULT1B1,NR1I2,CLRN3,EPS8L3,PHGR1,SLC39A5,CA2,SLC26A3,SLC26A2,GPX2,SLC17A4,B3GNT7,MUC12,LGALS4,TFF3,HHLA2,GUCY2C,TSPAN8,EPCAM,PADI2,GPA33,CDH17
Coexpression Atlas	mendel_RNAseq_e17.5_Urothelium_ShhCreRFP_2500	mendel_RNAseq_e17.5_Urothelium_ShhCreRFP_2500	Gudmap RNAseq	6.92e-41	2.82e-37	1.66e-38	1.47e-37	153	1629	HEXB,EPHX2,CNKSR1,ERBB3,ENPP1,MGAT4A,ATP8B1,CYP2S1,LDOC1,ME1,F3,SQOR,FAM3D,TTR,TUBA4A,DSCAML1,POF1B,ABHD17C,PLEKHH1,S100A6,ADORA1,TFCP2L1,NDRG1,HOOK1,MTUS1,PRELID2,SH3RF2,SCD,PRR13,CGN,AK4,PLAUR,DEGS2,FXYD3,RBM47,PLS1,OSGIN1,SEMA4B,ANG,EPB41L4B,CORO2A,KIAA1522,FA2H,ANXA4,CAMSAP3,PAQR8,PRR15L,XK,TMC4,CLDN3,CLDN7,PPARA,VSIG10,CPT1A,CDCP1,BHLHE40,ZFP36,SEMA4G,LPIN3,TXNIP,MST1,LSR,TMEM45B,SLCO2A1,NT5…
Coexpression	MM3635	DESCARTES_ORGANOGENESIS_HEPATOCYTES	M8: Cell Type Signature	1.11e-40	1.07e-36	1.78e-37	1.74e-36	80	535	EPHX2,HGD,CHDH,SERPINF1,TMEM176A,ATP8B1,FOXA3,F2,HNF4A,HNF4G,FABP1,HAVCR1,SERPINA1,TFCP2L1,NDRG1,AFP,HPN,AGT,FGB,QPCT,ABCC2,PLG,SERPINF2,ALDOB,BAIAP2L2,OSGIN1,ANPEP,ANXA4,AGPAT2,HKDC1,SLC39A4,APOA1,APOA2,APOB,FADS6,PPARA,BHLHE40,ABCC6,SEMA4G,MST1,SHROOM1,RHPN2,ASL,TMEM37,MTTP,IGSF1,OCLN,CIDEB,PECR,CYP3A5,CDHR2,KIF12,PBLD,ANKS4B,STEAP2,RNF43,ITIH2,SLC36A2,CFB,APOM,GJB1,NR1I2,CREB3L3,SLC39A5,SLC27A…
Coexpression Atlas	mendel_RNAseq_e18.5_Urothelium_Krt5CreRFP_2500	mendel_RNAseq_e18.5_Urothelium_Krt5CreRFP_2500	Gudmap RNAseq	2.32e-40	9.43e-37	5.24e-38	4.66e-37	167	1928	HEXB,TSPAN15,EPHX2,CNKSR1,ERBB3,HLA-DMB,ENPP1,MGAT4A,TMEM176A,ATP8B1,CYP2S1,LDOC1,PFKP,KLF4,ME1,F3,SQOR,FAM3D,TTR,TUBA4A,DSCAML1,POF1B,PLEKHH1,S100A6,ADORA1,MGAT3,NDRG1,HOOK1,MTUS1,PRELID2,SH3RF2,SCD,PRR13,CGN,AK4,PLAUR,FBXO32,FXYD3,RBM47,PLS1,OSGIN1,VEGFA,SEMA4B,FLNB,HSD17B7,ANG,EPB41L4B,CORO2A,KIAA1522,FA2H,ANXA4,AGPAT2,CAMSAP3,TMC4,CLDN3,CLDN7,PPARA,VSIG10,CPT1A,CDCP1,BHLHE40,ZFP36,SEMA4G,LPIN…
Coexpression Atlas	PCBC_ratio_MESO-30_vs_SC_cfr-2X-p05	Mesoderm Day 30_vs_Pluripotent Stem Cells-Confounder_removed-fold2.0_adjp0.05	PCBC_AltAnalyze	3.23e-40	1.32e-36	6.92e-38	6.15e-37	152	1630	HEXB,TSPAN15,PCSK5,HGD,HDHD3,TMEM144,CDX2,TLCD4,SERPINF1,TMEM176A,PFKP,F2,HNF4A,ME1,F3,PLAC8,FABP1,CKB,MEP1A,S100A6,HAVCR1,SIAE,MELTF,SERPINA1,SERPINA4,MGAT3,CAMK2N1,NDRG1,FCGRT,HPN,AGT,FGB,QPCT,PLAUR,PLG,SERPINF2,GLTPD2,PLOD2,VEGFA,DUOXA2,VIL1,FLNB,SELENOP,VTN,ANG,TMEM176B,ANPEP,UBD,ERO1A,ANXA4,AGPAT2,HKDC1,DUOX2,CXCL14,CP,APOA1,APOA2,APOA4,APOB,TMC4,BHLHE40,SLC1A1,ZFP36,SEMA4G,HAPLN1,IFNGR1,TXN…
Coexpression Atlas	mendel_RNAseq_e17.5_Urothelium_ShhCreRFP_2500_K1	mendel_RNAseq_e17.5_Urothelium_ShhCreRFP_2500_K1	Gudmap RNAseq	5.15e-39	2.1e-35	1.05e-36	9.32e-36	115	987	HEXB,CNKSR1,ERBB3,ENPP1,MGAT4A,ATP8B1,CYP2S1,LDOC1,ME1,SQOR,FAM3D,TTR,TUBA4A,DSCAML1,POF1B,PLEKHH1,S100A6,ADORA1,NDRG1,MTUS1,SH3RF2,PRR13,CGN,PLAUR,FXYD3,RBM47,PLS1,OSGIN1,ANG,EPB41L4B,CORO2A,KIAA1522,FA2H,ANXA4,CAMSAP3,PRR15L,TMC4,CLDN7,CPT1A,CDCP1,BHLHE40,ZFP36,SEMA4G,LPIN3,TXNIP,LSR,SLCO2A1,CCDC68,RASEF,ATF3,ARHGAP27,FUT2,OCLN,ATP1B1,RNF39,SDCBP2,MCTP2,IL6R,ACSL5,SORL1,TJP3,ABCC3,ANO9,PRSS8,GA…
Coexpression Atlas	gudmap_kidney_adult_RenalCortexMixed_Std_500	kidney_adult_RenalCortexMixed_Std_top-relative-expression-ranked_500	Gudmap Mouse MOE430.2	1.88e-38	7.64e-35	3.64e-36	3.23e-35	76	424	HEXB,EPHX2,HGD,ENPP2,TMEM176A,ME1,SQOR,TTR,TUBA4A,MEP1A,SERPINA1,NDRG1,SCD,SCNN1A,UGT8,AK4,DEGS2,ABCC2,SLC51A,ALDOB,RBM47,PLS1,VIL1,SELENOP,ANPEP,AOAH,APOA2,SLC1A1,SLC3A1,SLC51B,LRRC19,TMEM45B,ATP1B1,FXYD2,CIDEB,PECR,GALNT3,ABHD3,GATM,CDHR5,GCNT1,ACSS2,ANKS4B,RETSAT,CFB,GGT1,CEACAM1,APOM,TINAG,SULT1B1,CHPT1,CLRN3,ATP11A,CALML4,CA2,SLC27A2,DPEP1,DPP4,TCN2,TMT1B,GPX3,SLC19A3,GLB1L2,SLC44A4,PAPSS2,A…
Coexpression	M40028	BUSSLINGER_DUODENAL_LATE_IMMATURE_ENTEROCYTES	C8: Cell Type Signature	2.15e-38	2.07e-34	2.95e-35	2.88e-34	49	177	EPHX2,HNF4G,FABP1,MEP1A,CAMK2N1,CLIC5,ABCG2,SMPD3,ALDOB,RBM47,PLS1,RNF186,ANPEP,ANXA4,DHRS11,APOB,XPNPEP2,MUC13,SLC1A1,TDP2,GDA,MISP,TMEM45B,SLC15A1,MTTP,ATP1A1,ATP1B1,DGAT1,ACSL5,CIDEB,MYO1A,IQGAP2,CYP3A5,GATM,PBLD,CDHR5,SULT1A1,CREB3L3,SLC39A5,CA2,SLC26A3,RAB17,AMN,LGALS4,ACE2,CRYL1,TM4SF4,HSD17B11,CDH17
Coexpression Atlas	gudmap_kidney_adult_JuxtaGlom_Ren1_Captopr_k2_1000	kidney_adult_JuxtaGlom_Ren1_Captopr_k-means-cluster#2_top-relative-expression-ranked_1000	Gudmap Mouse MOE430.2	4.03e-38	1.64e-34	7.46e-36	6.63e-35	77	441	HEXB,EPHX2,HGD,HLA-DMB,ENPP1,ENPP2,TMEM176A,HNF4A,ME1,SQOR,TUBA4A,MEP1A,TFCP2L1,NDRG1,SCNN1A,UGT8,AK4,ABCG2,DEGS2,ABCC2,ALDOB,RBM47,VIL1,SELENOP,TMEM176B,AOAH,APOB,CPT1A,SLC1A1,SLC3A1,SLC51B,SLC9A3,LRRC19,TMEM45B,SLC22A5,TMEM37,ATP1A1,ATP1B1,FXYD2,SORL1,CIDEB,PECR,GALNT3,MYO6,ABHD3,GATM,PAQR5,CDHR5,GCNT1,STEAP2,RETSAT,GGT1,TINAG,CHPT1,PTPRJ,CALML4,CA2,SLC27A2,CA12,DPEP1,TCN2,TMT1B,GPX3,SLC19A3,CX…
Coexpression Atlas	gudmap_kidney_adult_JuxtaGlom_Ren1_Captopr_1000	kidney_adult_JuxtaGlom_Ren1_Captopr_top-relative-expression-ranked_1000	Gudmap Mouse MOE430.2	2.07e-37	8.44e-34	3.67e-35	3.26e-34	100	779	HEXB,EPHX2,HGD,HLA-DMB,ENPP1,ENPP2,TMEM176A,MGLL,HNF4A,ME1,SQOR,TUBA4A,MEP1A,S100A6,TFCP2L1,NDRG1,SCNN1A,QPCT,UGT8,AK4,ABCG2,DEGS2,ABCC2,ALDOB,RBM47,VIL1,SELENOP,TMEM176B,AOAH,CP,APOB,CPT1A,SLC1A1,SLC3A1,SLC51B,TXNIP,SLC9A3,LRRC19,TMEM45B,SLCO2A1,SLC22A5,TMEM37,PCP4L1,ATP1A1,ATP1B1,FXYD2,IL2RG,ACSL5,SORL1,CIDEB,TTC39B,PECR,GALNT3,MYO1D,MYO6,TNFSF10,RAPGEF5,ABHD3,GATM,PAQR5,CDHR5,GCNT1,STEAP2,RETS…
Coexpression Atlas	gudmap_developingKidney_e14.5 whole kidney - wildtype_1000_k5	DevelopingKidney_e14.5 whole kidney - wildtype_emap-6674_k-means-cluster#5_top-relative-expression-ranked_1000	Gudmap Mouse MOE430.2	2.79e-37	1.13e-33	4.72e-35	4.2e-34	61	267	TMEM144,HLA-DMB,B3GALT5,PFKP,HNF4A,TUBA4A,MEP1A,SERPINA1,AFP,HPN,SLC51A,SERPINF2,ALDOB,RBM47,PLS1,VIL1,ERO1A,PRR15L,SLC3A1,TMEM45B,UNC5CL,ATP1A1,FXYD2,SOD3,CIDEB,PRSS8,MYO6,CDHR2,ABHD3,PAQR5,KIF12,SPOCK2,GCNT1,ANKS4B,STEAP2,ELOVL2,GGT1,APOM,TINAG,GUCD1,CLRN3,FZD5,COBL,CALML4,SLC39A5,CA2,SLC27A2,NPNT,CA12,DPP4,AMN,TCN2,MAP7,SLC44A4,SGK2,ACE2,MLXIPL,LACTB2,LMO7,RASSF6,SUSD2
Coexpression Atlas	gudmap_kidney_adult_JuxtaGlom_Ren1_500	kidney_adult_JuxtaGlom_Ren1_top-relative-expression-ranked_500	Gudmap Mouse MOE430.2	1.2e-35	4.88e-32	1.95e-33	1.74e-32	71	400	EPHX2,HGD,ENPP2,TMEM176A,MGLL,HNF4A,ME1,SQOR,TUBA4A,MEP1A,TFCP2L1,NDRG1,SCNN1A,UGT8,AK4,DEGS2,ABCC2,ALDOB,RBM47,SELENOP,AOAH,APOB,SLC1A1,SLC3A1,SLC51B,SLC9A3,LRRC19,SLCO2A1,PCP4L1,ATP1A1,ATP1B1,FXYD2,CIDEB,PECR,PRSS8,GALNT3,MYO6,ABHD3,GATM,PAQR5,CDHR5,GCNT1,RETSAT,CFB,GGT1,TINAG,CHPT1,ATP11A,CALML4,CA2,SLC27A2,CA12,DPEP1,DPP4,TCN2,TMT1B,GPX3,AHCYL2,GLB1L2,MAP7,SLC44A4,PAPSS2,SGK2,SLC22A18,CRYL1,L…
Coexpression Atlas	gudmap_developingKidney_e15.5_Proximal Tubules_1000_k4	DevelopingKidney_e15.5_Proximal Tubules_emap-28005_k-means-cluster#4_top-relative-expression-ranked_1000	Gudmap Mouse MOE430.2	3.41e-35	1.39e-31	5.33e-33	4.74e-32	53	207	HGD,TMEM144,HLA-DMB,CHDH,TUBA4A,MEP1A,PLEKHH1,NDRG1,AFP,HPN,ABCC2,SERPINF2,ALDOB,SLC1A1,SLC3A1,SLC51B,TMEM45B,SLCO2A1,CCDC68,FXYD2,CIDEB,PRSS8,CDHR2,TMEM135,ABHD3,PAQR5,PBLD,ANKS4B,STEAP2,CFB,GGT1,APOM,TINAG,CHPT1,CLRN3,SEMA3B,CALML4,SLC39A5,CA2,SLC27A2,DPEP1,SLC11A2,AMN,TCN2,TMT1B,SLC44A4,USH1C,ACE2,USP2,SUSD2,ENTPD5,TMPRSS2,PC
Coexpression	M39148	GAO_SMALL_INTESTINE_24W_C4_ENTEROCYTE_PROGENITOR_SUBTYPE_2	C8: Cell Type Signature	4.18e-35	4.02e-31	5.02e-32	4.9e-31	37	97	CNKSR1,TMEM144,AOC1,MYORG,MEP1A,SERPINA4,AFP,AGT,ABCC2,ALDOB,SLC9A3-OT1,ALPI,OSGIN1,RNF186,VTN,ANXA4,APOA1,APOA4,APOB,XPNPEP2,MUC13,MST1,C11orf86,PRSS3,MYO1A,GCHFR,IL22RA1,NAGS,CFB,GJB1,SULT1B1,DPEP1,DPP4,RAB25,TMT1B,RBP4,HHLA2
Coexpression Atlas	gudmap_developingLowerUrinaryTract_adult_ureter_1000	DevelopingLowerUrinaryTract_adult_ureter_emap-29479_top-relative-expression-ranked_1000	Gudmap Mouse MOE430.2	6.05e-35	2.46e-31	9.12e-33	8.11e-32	94	736	HEXB,ERBB3,GCNT3,SLCO2B1,ENPP1,TLCD4,CHDH,MGAT4A,ATP8B1,F3,SQOR,FAM3D,TTR,TUBA4A,LRG1,POF1B,FABP1,PLEKHH1,S100A6,SERPINA1,TFCP2L1,MGAT3,CLIC5,MTUS1,CGN,FBXO32,MMP7,FXYD3,RBM47,PLS1,OSGIN1,ANG,EPB41L4B,CORO2A,ANXA4,PAQR8,PRR15L,TMPRSS4,CP,TMC4,CLDN3,CLDN7,VSIG10,CDCP1,BHLHE40,MST1,GDA,TMEM45B,RHPN2,SLCO2A1,CCDC68,RASEF,OCLN,ATP1B1,RNF39,SDCBP2,SORL1,TJP3,ABCC3,CYP2B6,GALNT3,TNFSF10,CYP3A5,CYP27A1,…
Coexpression Atlas	gudmap_kidney single cell_adult_RenalCortexMixed_Scamp_k1_1000	kidney single cell_adult_RenalCortexMixed_StemCellamp_k-means-cluster#1_top-relative-expression-ranked_1000	Gudmap Mouse MOE430.2	2.97e-34	1.21e-30	4.32e-32	3.84e-31	99	831	EPHX2,HGD,ENPP2,TMEM176A,MGLL,ME1,SQOR,TTR,TUBA4A,LRG1,PLAC8,MEP1A,SERPINA1,NDRG1,FCGRT,HPN,AGT,SCNN1A,OSBPL9,AK4,DEGS2,SLC51A,SERPINF2,ALDOB,VIL1,SELENOP,RNF186,TMEM176B,PRXL2B,ANXA4,DHRS11,AOAH,PRR15L,APOA4,CLDN7,SLC1A1,SLC3A1,SLC51B,TMEM45B,ASL,FRZB,ATP1B1,FXYD2,SOD3,CIDEB,PECR,PRSS8,TMEM135,ABHD3,GATM,PAQR5,PBLD,CDHR5,GCNT1,ACSS2,RETSAT,CFB,GGT1,APOM,GGH,GJB1,TINAG,CHPT1,CLRN3,NQO1,CALML4,MAR…
Coexpression	M40013	BUSSLINGER_GASTRIC_MATURE_PIT_CELLS	C8: Cell Type Signature	3.33e-34	3.2e-30	3.56e-31	3.47e-30	50	224	CEACAM5,MGLL,CYP2S1,KLF4,FOXA3,PLAC8,S100A6,FCGRT,SCNN1A,FXYD3,RBM47,VEGFA,FLNB,ANG,FA2H,PAQR8,DUOX2,C15orf48,PRKCD,RASEF,CTNNA1,MAPK3,OCLN,MUC1,ATP2A3,ABCC3,SPIRE2,CYP3A5,ITPR3,CAPN8,VILL,NQO1,EPS8L3,PHGR1,CA2,TCF7L2,LINC01559,GPX2,TSPAN3,LGALS3,TFF2,LGALS4,ABLIM1,LMO7,TSPAN8,ELF3,CD151,PRR15,ARHGEF2,MXD1
Coexpression	M39174	MURARO_PANCREAS_ACINAR_CELL	C8: Cell Type Signature	2.38e-32	2.29e-28	2.29e-29	2.23e-28	82	732	TSPAN15,HDHD3,ERBB3,GCNT3,HLA-DMA,SERPINF1,GOLM1,RPS24,ATP8B1,F3,LRG1,NDRG1,MTUS1,HPN,CCL20,ALDOB,RBM47,MUC20,USP53,BNIP5,VTN,ANPEP,EPB41L4B,UBD,KIAA1522,ERO1A,FA2H,ANXA4,PRR15L,DUOX2,TMC4,CLDN7,BHLHE40,IFNGR1,LSR,UNC5CL,C15orf48,RASEF,ATF3,OCLN,MUC1,CXADR,MXI1,ABCC3,PRSS3,GALNT3,IQGAP2,TNFSF10,CYP3A5,ARHGAP26,SRI,GATM,ATP10B,PBLD,RETSAT,IL22RA1,TMBIM1,CFB,GJB1,GUCD1,FZD5,KLF5,CA12,SRD5A3,TCN1,GP…
Coexpression Atlas	gudmap_kidney single cell_adult_RenalCortexMixed_Scamp_1000	kidney single cell_adult_RenalCortexMixed_StemCellamp_top-relative-expression-ranked_1000	Gudmap Mouse MOE430.2	6.91e-32	2.81e-28	9.7e-30	8.62e-29	99	887	EPHX2,HGD,ENPP2,TMEM176A,MGLL,ME1,SQOR,TTR,TUBA4A,LRG1,PLAC8,MEP1A,SERPINA1,NDRG1,FCGRT,HPN,AGT,SCNN1A,OSBPL9,AK4,DEGS2,SLC51A,SERPINF2,ALDOB,VIL1,SELENOP,RNF186,TMEM176B,PRXL2B,ANXA4,DHRS11,AOAH,PRR15L,APOA4,CLDN7,SLC1A1,SLC3A1,SLC51B,TMEM45B,ASL,FRZB,ATP1B1,FXYD2,SOD3,CIDEB,PECR,PRSS8,TMEM135,ABHD3,GATM,PAQR5,PBLD,CDHR5,GCNT1,ACSS2,RETSAT,CFB,GGT1,APOM,GGH,GJB1,TINAG,CHPT1,CLRN3,NQO1,CALML4,MAR…
Coexpression Atlas	gudmap_developingKidney_e14.5 whole kidney - wildtype_emap-6674_1000	DevelopingKidney_e14.5 whole kidney - wildtype_emap-6674_top-relative-expression-ranked_1000	Gudmap Mouse MOE430.2	1.42e-31	5.78e-28	1.93e-29	1.71e-28	91	761	TMEM144,HLA-DMB,MGAT4A,B3GALT5,PFKP,HNF4A,TUBA4A,MEP1A,ADORA1,SERPINA1,CAMK2N1,CLIC5,AFP,HPN,UGT8,AK4,SLC51A,SERPINF2,ALDOB,RBM47,PLS1,VIL1,HSD17B7,ANG,ERO1A,SGPP2,PRR15L,CXCL14,CDCP1,SLC3A1,TMEM45B,UNC5CL,TMEM37,ATP1A1,C1QTNF12,ATP1B1,MUC1,FXYD2,IPMK,CXADR,SOD3,CIDEB,PRSS8,NAAA,MYO6,CDHR2,ABHD3,PAQR5,KIF12,SPOCK2,GCHFR,GCNT1,ANKS4B,STEAP2,ELOVL2,GGT1,APOM,BMP2,TINAG,GUCD1,CLRN3,FZD5,COBL,CALML4,…
Coexpression	M40287	DESCARTES_FETAL_SPLEEN_AFP_ALB_POSITIVE_CELLS	C8: Cell Type Signature	3.72e-31	3.58e-27	3.26e-28	3.17e-27	44	188	CHDH,F2,HNF4A,TTR,LRG1,FABP1,SERPINA1,SERPINA4,AFP,SCD,HPN,AGT,FGB,PLG,SERPINF2,ALDOB,VTN,AGPAT2,APOA1,APOA2,APOB,ABCC6,MST1,IGF2,MTTP,IGSF1,FXYD2,CYP3A5,GATM,PBLD,RETSAT,ELOVL2,ITIH2,APOM,GJB1,SLC39A5,SLC38A3,SLC27A2,AMN,RBP4,TF,TM4SF4,SLC39A14,SERPINA5
Coexpression Atlas	gudmap_RNAseq_e11.5_Ureteric_bud_2500	gudmap_RNAseq_e11.5_Ureteric_bud_2500	Gudmap RNAseq	8.33e-31	3.39e-27	1.09e-28	9.72e-28	139	1685	TSPAN15,HDHD3,CNKSR1,ERBB3,HLA-DMB,SLCO2B1,MGAT4A,TMEM176A,CARD10,MGLL,ATP8B1,LDOC1,PFKP,ACVRL1,SQOR,FAM3D,TUBA4A,DSCAML1,POF1B,PLAC8,S100A6,TFCP2L1,MFNG,CLIC5,SEMA6D,HOXD1,HOOK1,HPN,PRR13,CGN,PLAUR,ABCG2,FXYD3,RBM47,BAIAP2L2,OSGIN1,SELENOP,ANG,TMEM176B,CORO2A,FA2H,ANXA4,AGPAT2,CAMSAP3,PRR15L,SLC39A4,TMC4,CLDN3,CLDN7,VSIG10,CDCP1,BHLHE40,ZFP36,HAPLN1,IFNGR1,LPIN3,TXNIP,LSR,IGF2,AATK,DOK4,RHPN2,SL…
Coexpression	M38993	MEBARKI_HCC_PROGENITOR_FZD8CRD_DN	C2:CGP: Chemical and Genetic Perturbations	8.65e-31	8.32e-27	6.93e-28	6.76e-27	64	459	EPHX2,HGD,ERBB3,PLCXD1,SERPINF1,WIPF3,TMEM176A,SNAP47,FABP1,SERPINA1,MTUS1,HPN,AGT,FGB,MMP7,ALDOB,BAIAP2L2,MUC20,VEGFA,ANG,TMEM176B,LMNTD2,ABCC6,SEMA4G,LPIN3,MST1,GDA,ASL,CIDEC,C11orf86,DGAT1,CIDEB,PAG1,CYP2B6,CYP3A5,INSIG1,GATM,GCHFR,RNF43,CEACAM1,GJB1,CLRN3,CREB3L3,DPP4,HNF1A,TRIM15,RAB17,SLC17A4,NR1H3,KLC4,SYT7,SGK2,SLC22A18,ORM1,MLXIPL,ABCC6P1,C1orf115,EFNA1,CLMN,TM4SF4,RORA,PC,SERPINA5,CDH16
Coexpression Atlas	gudmap_developingLowerUrinaryTract_e13.5_bladder epithelial cells_1000	DevelopingLowerUrinaryTract_e13.5_bladder epithelial cells_emap-30875_top-relative-expression-ranked_1000	Gudmap Mouse MOE430.2	9.53e-31	3.88e-27	1.21e-28	1.08e-27	91	780	HEXB,ERBB3,GCNT3,ENPP1,TLCD4,MGAT4A,ATP8B1,LDOC1,ME1,TTR,POF1B,FABP1,PLEKHH1,S100A6,HOXD1,MTA3,HOOK1,PIK3CB,CGN,UGT8,AK4,FXYD3,RBM47,PLS1,RNF186,CORO2A,FA2H,CAMSAP3,TMPRSS4,SLC39A4,TMC4,CLDN3,CLDN7,VSIG10,CDCP1,ZFP36,SEMA4G,HAPLN1,TMEM45B,RHPN2,SLCO2A1,CCDC68,RASEF,ATF3,OCLN,ATP1B1,SDCBP2,CXADR,ACSL5,SORL1,TJP3,ABCC3,ANO9,PRSS8,GALNT3,ABHD3,PAQR5,GCNT1,RNF43,ITIH2,KLF5,SEMA3B,NQO1,COBL,MARVELD3,R…
Coexpression Atlas	gudmap_developingKidney_e15.5_Medullary collecting duct_1000	DevelopingKidney_e15.5_Medullary collecting duct_emap-28063_top-relative-expression-ranked_1000	Gudmap Mouse MOE430.2	1.72e-30	6.99e-27	2.12e-28	1.88e-27	91	786	RGMB,CNKSR1,ERBB3,GCNT3,MGAT4A,ATP8B1,F3,FAM3D,TUBA4A,POF1B,PLAC8,S100A6,ADORA1,TFCP2L1,CAMK2N1,CLIC5,HOXD1,HOOK1,AP2A2,AFP,HPN,CGN,UGT8,PLAG1,DEGS2,FXYD3,RBM47,MUC20,VEGFA,RNF186,CORO2A,CAMSAP3,SGPP2,HKDC1,TMC4,CLDN3,CLDN7,CDCP1,IGF2,TMEM45B,RHPN2,ATP1A1,OCLN,C1QTNF12,ATP1B1,MUC1,PRDM16,SORL1,TJP3,ABCC3,PRSS8,GALNT3,MYO1D,IQGAP2,MYO6,PAQR5,KIF12,ATP10B,GDNF,ITPR3,GJB1,TINAG,CHPT1,VILL,KLF5,SEMA3…
Coexpression	M2342	FEVR_CTNNB1_TARGETS_UP	C2:CGP: Chemical and Genetic Perturbations	2.33e-30	2.25e-26	1.73e-27	1.68e-26	77	688	PCSK5,PHYKPL,AOC1,HLA-DMA,HLA-DMB,B3GALT5,ME1,FAM3D,FABP1,CKB,S100A6,CLCN2,CLIC5,AP2A2,CGN,CCL5,TMEM164,OSGIN1,BNIP5,HSD17B7,VTN,CORO2A,ERO1A,MYO18A,APOA1,CLDN3,CLSTN1,BHLHE40,SLC1A1,SLC3A1,SLC51B,SLC6A8,SLC15A1,SLCO2A1,MTTP,ATF3,OCLN,MUC1,SDCBP2,ATP2A3,CXADR,CIDEB,TTC39B,PRSS3,CYP27A1,GATM,FAM83E,IRF1,IRF7,GCNT1,GGT1,ITPKA,EPS8L3,MVP,SLC38A3,DPEP1,DPP4,EGLN3,SLC26A3,SLC11A2,AMN,GPR35,GPX2,CXCL16…
Coexpression	M40010	BUSSLINGER_GASTRIC_ISTHMUS_CELLS	C8: Cell Type Signature	5.63e-30	5.42e-26	3.87e-27	3.77e-26	63	458	TSPAN15,MGLL,RPS24,ATP8B1,CYP2S1,KLF4,ME1,FER1L6,S100A6,TFCP2L1,SCD,SMPD3,FXYD3,RBM47,FLNB,CORO2A,KIAA1522,PAQR8,TMPRSS4,BHLHE40,MISP,PRKCD,RASEF,CTNNA1,MAPK3,ATP1A1,MUC1,ATP2A3,ABCC3,MYO1A,CYP3A5,RETSAT,ITGB4,ITPR3,CAPN8,VILL,KLF5,SEMA3B,NQO1,EPS8L3,MVP,CA2,TCF7L2,KCNE3,TRIM2,GPX2,USH1C,TSPAN3,LGALS3,LGALS4,ABLIM1,PLLP,SLC44A1,LLGL2,INF2,LMO7,RASSF6,CLMN,TSPAN8,SERPINB1,ELF3,CD151,EPCAM
Coexpression Atlas	Arv_SC_fibroblast_1000	AravindRamakr_StemCell_from_inducedPluripotentialStemCells_derived from_from_fibroblast_top-relative-expression-ranked_1000	PCBC	1.89e-29	7.7e-26	2.2e-27	1.96e-26	101	986	CDX2,CEACAM5,AOC1,GCNT3,SYN3,HLA-DMB,RIMKLA,CEACAM7,TMEM176A,B3GALT5,CYP2S1,ZBED10P,FOXA3,HNF4G,FAM3D,FABP1,MEP1A,SERPINA1,HPN,CGN,SCNN1A,CCL20,FXYD3,ALDOB,RBM47,LRRC75A,ALPI,VIL1,VIPR2,TMEM176B,EPB41L4B,TMEM253,PRR15L,TMPRSS4,APOA1,APOA4,APOB,CLDN3,XPNPEP2,MUC13,LSR,GDA,MISP,TMEM45B,SLC15A1,C15orf48,MTTP,RASEF,IGSF1,MUC3A,MUC4,IL2RG,ACSL5,TJP3,PRSS8,MYO1A,CYP3A5,CDHR2,FAM83E,CEACAM6,GDPD2,CDHR5,…
Coexpression Atlas	Arv_SC-HD_1000	AravindRamakr_StemCell-HD_top-relative-expression-ranked_1000	PCBC	1.89e-29	7.7e-26	2.2e-27	1.96e-26	101	986	CDX2,CEACAM5,AOC1,GCNT3,SYN3,HLA-DMB,RIMKLA,CEACAM7,TMEM176A,B3GALT5,CYP2S1,ZBED10P,FOXA3,HNF4G,FAM3D,FABP1,MEP1A,SERPINA1,HPN,CGN,SCNN1A,CCL20,FXYD3,ALDOB,RBM47,LRRC75A,ALPI,VIL1,VIPR2,TMEM176B,EPB41L4B,TMEM253,PRR15L,TMPRSS4,APOA1,APOA4,APOB,CLDN3,XPNPEP2,MUC13,LSR,GDA,MISP,TMEM45B,SLC15A1,C15orf48,MTTP,RASEF,IGSF1,MUC3A,MUC4,IL2RG,ACSL5,TJP3,PRSS8,MYO1A,CYP3A5,CDHR2,FAM83E,CEACAM6,GDPD2,CDHR5,…
Coexpression Atlas	gudmap_kidney_adult_CortVasc_Tie2_1000	kidney_adult_CortVasc_Tie2_top-relative-expression-ranked_1000	Gudmap Mouse MOE430.2	9.62e-29	3.92e-25	1.09e-26	9.67e-26	92	846	HEXB,EPHX2,HGD,HLA-DMA,HLA-DMB,TMEM176A,MGLL,ACVRL1,HNF4A,ME1,SQOR,TUBA4A,PLAC8,MEP1A,S100A6,SERPINA1,NDRG1,CLIC5,FCGRT,SCD,SCNN1A,UGT8,AK4,CCL5,ABCG2,DEGS2,ABCC2,ALDOB,RBM47,SELENOP,AOAH,SLC1A1,SLC3A1,IFNGR1,TXNIP,LRRC19,TMEM45B,PLPP3,SLCO2A1,PCP4L1,ATP1B1,FXYD2,ATP2A3,IL2RG,CIDEB,PECR,PRSS8,GALNT3,MYO1D,MYO6,TNFSF10,ERAP1,RAPGEF5,GATM,IRF1,IRF7,CDHR5,ISG20,GCNT1,TMBIM1,CFB,GGT1,CEACAM1,TINAG,CH…
Coexpression Atlas	gudmap_developingLowerUrinaryTract_e15.5_urothelium_1000	DevelopingLowerUrinaryTract_e15.5_Urothelium_emap-28091_top-relative-expression-ranked_1000	Gudmap Mouse MOE430.2	1.73e-28	7.02e-25	1.9e-26	1.69e-25	88	784	CNKSR1,ERBB3,GCNT3,MGAT4A,ATP8B1,LDOC1,FOXA3,HNF4A,F3,SQOR,FAM3D,TTR,POF1B,PLAC8,MEP1A,PLEKHH1,S100A6,TFCP2L1,HOXD1,AFP,CGN,UGT8,PLCB4,DEGS2,FXYD3,ALDOB,RBM47,PLS1,ANG,EPB41L4B,CORO2A,FA2H,SGPP2,HKDC1,TMC4,CLDN3,CLDN7,CDCP1,IGF2,TMEM45B,RHPN2,SLCO2A1,CCDC68,OCLN,C1QTNF12,ATP1B1,FXYD2,PRDM16,MCTP2,ACSL5,SORL1,TJP3,ABCC3,PRSS8,GALNT3,MYO1D,MYO6,PAQR5,KIF12,ATP10B,GCNT1,ITIH2,TINAG,CLRN3,KLF5,COBL,M…
Coexpression Atlas	gudmap_developingKidney_e15.5_Proximal Tubules_500	DevelopingKidney_e15.5_Proximal Tubules_emap-28005_top-relative-expression-ranked_500	Gudmap Mouse MOE430.2	1.81e-28	7.34e-25	1.93e-26	1.72e-25	62	389	CHDH,B3GALT5,HNF4A,MEP1A,PLEKHH1,SERPINA1,TFCP2L1,CAMK2N1,NDRG1,CLIC5,AFP,HPN,UGT8,ABCC2,SERPINF2,ALDOB,RBM47,PLS1,VIL1,SLC1A1,SLC3A1,TMEM45B,UNC5CL,CCDC68,FXYD2,PRSS8,MYO6,CDHR2,PAQR5,KIF12,PBLD,GCNT1,STEAP2,ELOVL2,CFB,GGT1,APOM,TINAG,GUCD1,MTMR11,CLRN3,CALML4,SLC39A5,SLC27A2,NPNT,CA12,DPEP1,DPP4,AMN,TMT1B,MAP7,SLC44A4,SGK2,ACE2,MLXIPL,LACTB2,SUSD2,ENTPD5,TMPRSS2,PRR15,ENTPD8,CDH16
Coexpression Atlas	gudmap_kidney_adult_JuxtaGlom_Ren1_k4_1000	kidney_adult_JuxtaGlom_Ren1_k-means-cluster#4_top-relative-expression-ranked_1000	Gudmap Mouse MOE430.2	3.48e-28	1.42e-24	3.63e-26	3.23e-25	55	304	HEXB,EPHX2,HGD,LRRC66,ENPP1,TMEM176A,ME1,SQOR,TUBA4A,MEP1A,UGT8,AK4,DEGS2,SLC51A,PLS1,VIL1,TMEM176B,ANPEP,PRXL2B,APOA2,SLC1A1,SLC3A1,SLC51B,LRRC19,TMEM45B,ASL,SLC22A5,CIDEB,PECR,GALNT3,ABHD3,PBLD,ACSS2,STEAP2,RETSAT,TINAG,CHPT1,CLRN3,ATP11A,CALML4,CA2,DPEP1,TMT1B,GLB1L2,SLC44A4,PAPSS2,ACE2,SLC22A18,CRYL1,PLLP,SLC35A3,SLC16A4,SUSD2,CDA,HSD17B11
Coexpression Atlas	Arv_SC-H9hpx_1000	AravindRamakr_StemCell-H9hpx_top-relative-expression-ranked_1000	PCBC	3.95e-28	1.61e-24	3.92e-26	3.49e-25	99	987	CDX2,CEACAM5,AOC1,GCNT3,SYN3,HLA-DMB,RIMKLA,CEACAM7,TMEM176A,B3GALT5,CYP2S1,FOXA3,FAM3D,PLAC8,FABP1,MEP1A,SERPINA1,MUC17,AFP,HPN,SCNN1A,CCL20,FXYD3,ALDOB,RBM47,CXCL5,LRRC75A,ALPI,ALPG,VIL1,TMEM176B,EPB41L4B,AOAH,PRR15L,TMPRSS4,APOA1,APOA4,APOB,CLDN3,CLDN7,XPNPEP2,MUC13,LSR,GDA,MISP,C1orf226,TRIB3,TMEM45B,C15orf48,MTTP,IGSF1,MUC3A,MUC4,TJP3,PRSS8,MYO1A,MYO7B,CYP3A5,CDHR2,LGALS14,FAM83E,CEACAM6,GDP…
Coexpression Atlas	Arv_SC-hpx_blastocyst_1000	AravindRamakr_StemCell-hypoxiaGrown_fromBlastocyst-derived-humanEmbryonicStemCells_top-relative-expression-ranked_1000	PCBC	3.95e-28	1.61e-24	3.92e-26	3.49e-25	99	987	CDX2,CEACAM5,AOC1,GCNT3,SYN3,HLA-DMB,RIMKLA,CEACAM7,TMEM176A,B3GALT5,CYP2S1,FOXA3,FAM3D,PLAC8,FABP1,MEP1A,SERPINA1,MUC17,AFP,HPN,SCNN1A,CCL20,FXYD3,ALDOB,RBM47,CXCL5,LRRC75A,ALPI,ALPG,VIL1,TMEM176B,EPB41L4B,AOAH,PRR15L,TMPRSS4,APOA1,APOA4,APOB,CLDN3,CLDN7,XPNPEP2,MUC13,LSR,GDA,MISP,C1orf226,TRIB3,TMEM45B,C15orf48,MTTP,IGSF1,MUC3A,MUC4,TJP3,PRSS8,MYO1A,MYO7B,CYP3A5,CDHR2,LGALS14,FAM83E,CEACAM6,GDP…
Coexpression	M2768	ESC_J1_UP_LATE.V1_UP	C6: Oncogenic Signature	4.24e-28	4.08e-24	2.72e-25	2.65e-24	41	185	HNF4A,F3,TTR,AFP,FGB,FXYD3,VIL1,SELENOP,MOGAT2,HKDC1,APOA1,APOA2,APOB,CLDN7,IGF2,SLCO2A1,FRZB,MTTP,RAB11FIP5,ATF3,OCLN,CIDEB,PRSS8,MYO6,NAGA,APOM,BMP2,DPP4,P4HA2,AMN,TCN2,GPX3,RBP4,TFF3,TGFBR3,EFNA1,P2RX4,LMO7,P4HA1,TMPRSS2,PCDH1
Coexpression Atlas	gudmap_RNAseq_e11.5_Ureteric_bud_2500_K0	gudmap_RNAseq_e11.5_Ureteric_bud_2500_K0	Gudmap RNAseq	4.68e-28	1.9e-24	4.53e-26	4.03e-25	83	711	CNKSR1,ERBB3,MGAT4A,ATP8B1,PFKP,SQOR,FAM3D,TUBA4A,DSCAML1,POF1B,S100A6,HOXD1,HOOK1,PRR13,CGN,PLAUR,FXYD3,RBM47,OSGIN1,ANG,CORO2A,FA2H,ANXA4,AGPAT2,CAMSAP3,PRR15L,SLC39A4,TMC4,CLDN7,VSIG10,CDCP1,BHLHE40,ZFP36,LPIN3,LSR,SLCO2A1,ASL,CCDC68,RAB11FIP5,ATF3,ARHGAP27,ATP1A1,OCLN,ATP1B1,ACSL5,TJP3,ABCC3,ANO9,PRSS8,GALNT3,HCAR1,PAQR5,ATP10B,ITGB4,RNF43,TMBIM1,ITIH2,ITPR3,PTPN3,VILL,KLF5,SEMA3B,MARVELD3,RA…
Coexpression Atlas	gudmap_developingKidney_e14.5 whole kidney - wildtype_emap-6674_500	DevelopingKidney_e14.5 whole kidney - wildtype_emap-6674_top-relative-expression-ranked_500	Gudmap Mouse MOE430.2	7.07e-28	2.88e-24	6.69e-26	5.95e-25	61	385	HLA-DMB,PFKP,HNF4A,TUBA4A,MEP1A,ADORA1,SERPINA1,CAMK2N1,CLIC5,AFP,HPN,UGT8,SERPINF2,ALDOB,RBM47,PLS1,VIL1,ANG,PRR15L,CXCL14,TMEM45B,UNC5CL,ATP1A1,C1QTNF12,ATP1B1,FXYD2,CXADR,SOD3,CIDEB,NAAA,PAQR5,GCNT1,ANKS4B,STEAP2,ELOVL2,GGT1,BMP2,TINAG,CLRN3,FZD5,COBL,CALML4,SLC39A5,CA2,SLC27A2,NPNT,CA12,NDNF,DPP4,EGLN3,TRIM2,AMN,TCN2,PAPSS2,SGK2,ACE2,LACTB2,LMO7,SUSD2,SH3D19,CDH4
GO: Cellular Component	GO:0005903	brush border		1.23e-27	7.68e-25	7.68e-25	5.39e-24	42	168	CEACAM5,CEACAM7,ATP8B1,HAVCR1,MUC17,PIK3CB,NPC1L1,CGN,ABCG2,ABCC2,PLS1,ALPI,VIL1,FLNB,ANPEP,CORO2A,MYO18A,SLC3A1,SLC9A3,SLC15A1,SLC22A5,MTTP,MYO1A,MYO1D,MYO6,MYO7B,CDHR2,CEACAM6,CDHR5,SLC46A1,ANKS4B,CEACAM1,ITPR3,DIAPH1,ESPN,SLC26A3,SLC11A2,AMN,SLC17A4,USH1C,ACE2,SLC6A14
Coexpression Atlas	gudmap_developingKidney_e15.5_early proxim tubul_1000_k5	DevelopingKidney_e15.5_early proxim tubul_emap-28005_k-means-cluster#5_top-relative-expression-ranked_1000	Gudmap Mouse MOE430.2	1.3e-27	5.3e-24	1.21e-25	1.07e-24	48	230	HGD,HLA-DMA,CHDH,TMEM176A,MEP1A,NDRG1,AFP,HPN,SLC51A,SERPINF2,ALDOB,TMEM176B,ANPEP,XPNPEP2,SLC1A1,SLC3A1,SLC51B,MISP,TMEM45B,SLCO2A1,FXYD2,CIDEB,PECR,MYO7B,CDHR2,TMEM135,PAQR5,PBLD,GGT1,TINAG,CLRN3,SEMA3B,CALML4,SLC39A5,DPEP1,SLC11A2,AMN,TCN2,TMT1B,KLC4,SLC44A4,USH1C,ACE2,USP2,SUSD2,ENTPD5,PAM,PC
Coexpression Atlas	ratio_EB-blastocyst_vs_EB-cbCD34_500_K1	ratio_EmbryoidBody-blastocyst_vs_EmbryoidBody-derived-from_CD34-iPSC_top-relative-expression-ranked_500_k-means-cluster#1	PCBC	3.44e-27	1.4e-23	3.11e-25	2.76e-24	44	192	CDX2,F2,HNF4A,FABP1,MEP1A,TMEM132C,HAVCR1,SERPINA1,AFP,FGB,PLG,SERPINF2,ALOX15B,VIL1,VTN,FA2H,APOA1,APOA2,APOA4,APOB,SLC3A1,MTTP,URAD,PRSS3,ITIH2,APOM,GJB1,LCN15,EPS8L3,CREB3L3,SLC39A5,GNRH2,DPEP1,RAB17,AMN,GPX2,RBP4,SLC44A4,TF,ORM1,LLGL2,TM4SF4,CCDC183,CDH17
Coexpression	M19062	DODD_NASOPHARYNGEAL_CARCINOMA_UP	C2:CGP: Chemical and Genetic Perturbations	4.09e-27	3.93e-23	2.46e-24	2.4e-23	123	1813	PCSK5,CNKSR1,CEACAM5,GCNT3,CEACAM7,B3GALT5,MGLL,ST6GALNAC6,FOXA3,F3,FAM3D,TUBA4A,LRG1,PLAC8,MYORG,CKB,PLEKHH1,S100A6,ADORA1,CLIC5,CGN,SCNN1A,SMPD3,DEGS2,ABCC2,SLC51A,PLS1,MUC20,VIPR1,VTN,EPB41L4B,KIAA1522,FA2H,AGPAT2,PRR15L,TMPRSS4,DUOX2,CP,TMC4,CLDN3,CLDN7,MUC13,ABCC6,ZFP36,MST1,GDA,MISP,TMEM45B,RHPN2,ASL,C15orf48,NT5C2,PRKCD,PCP4L1,CTNNA1,MAPK3,FUT2,MUC1,SDCBP2,MUC4,ATP2A3,TJP3,TTC39B,MASP1,CYP…
Coexpression	M40276	DESCARTES_FETAL_PLACENTA_AFP_ALB_POSITIVE_CELLS	C8: Cell Type Signature	4.42e-27	4.25e-23	2.5e-24	2.44e-23	39	173	F2,TTR,LRG1,FABP1,MEP1A,SERPINA1,SERPINA4,AFP,SCD,AGT,FGB,AK4,ABCC2,PLG,SERPINF2,ALDOB,VTN,APOA1,APOA2,APOB,XPNPEP2,ABCC6,SEMA4G,MST1,PBLD,ITIH2,APOM,FZD5,SLC39A5,SLC38A3,ESPN,AMN,TMPRSS6,RBP4,TF,MLXIPL,TM4SF4,HSD17B11,SERPINA5
Coexpression	M4210	CREIGHTON_ENDOCRINE_THERAPY_RESISTANCE_3	C2:CGP: Chemical and Genetic Perturbations	1.44e-26	1.39e-22	7.7e-24	7.5e-23	74	727	CEACAM5,AOC1,RIMKLA,B3GALT5,GOLM1,ATP8B1,ABHD17C,S100A6,CLIC5,MTUS1,CGN,SCNN1A,FGB,FBXO32,SLC51A,MUC20,VIPR1,EPB41L4B,CORO2A,SGPP2,CP,PPARA,MUC13,IFNGR1,MISP,TMEM45B,SLCO2A1,CCDC68,ARHGAP27,ATP1B1,MUC1,SDCBP2,CTSS,CXADR,ABCC3,PAG1,SPIRE2,GALNT3,CYP3A5,ARHGAP26,INSIG1,CEACAM6,GBP3,ATP10B,STEAP2,CFB,CEACAM1,PTPN3,PTPRH,PTPRJ,FZD5,TMEM163,CALML4,SLC27A2,ADAP1,SLC11A2,SRD5A3,RCAN1,TCN1,TRIM31,GALNT12…
Coexpression Atlas	PCBC_ratio_EB-blastocyst_vs_EB-cbCD34_500	ratio_EmbryoidBody-blastocyst_vs_EmbryoidBody-derived-from_CD34-iPSC_top-relative-expression-ranked_500	PCBC	1.72e-26	6.99e-23	1.52e-24	1.35e-23	66	479	CDX2,ABO,HLA-DMB,SLCO2B1,FOXA3,F2,HNF4A,FABP1,MEP1A,TMEM132C,HAVCR1,SERPINA1,AFP,HPN,AGT,FGB,HRH2,ABCG2,PLG,SERPINF2,ALDOB,ALOX15B,VIL1,VTN,ANPEP,FA2H,APOA1,APOA2,APOA4,APOB,SLC3A1,SLC15A1,MTTP,URAD,IL2RG,ACSL5,ABCC3,PRSS3,CDHR5,TRIM14,ITIH2,ITPKA,APOM,GJB1,LCN15,EPS8L3,CREB3L3,SLC39A5,GNRH2,DPEP1,SLC26A3,RAB17,AMN,GPX2,RBP4,SLC44A4,TF,ORM1,MLXIPL,LLGL2,CD7,TM4SF4,CCDC183,LY75,ARHGAP45,CDH17
Coexpression	M39108	AIZARANI_LIVER_C4_EPCAM_POS_BILE_DUCT_CELLS_1	C8: Cell Type Signature	1.95e-26	1.88e-22	9.88e-24	9.63e-23	40	191	ERBB3,ENPP2,MGLL,GOLM1,CKB,SERPINA4,CAMK2N1,AGT,VEGFA,VTN,ANPEP,KIAA1522,ANXA4,APOB,CLDN3,CLDN7,ATF3,ATP1A1,OCLN,ATP1B1,FXYD2,CXADR,SOD3,ABCC3,CYP3A5,PAQR5,KIF12,ITIH2,COBL,MARVELD3,CA2,SLC17A4,LGALS4,CLMN,TM4SF4,TMPRSS2,ELF3,HSD17B11,EPCAM,SERPINA5
Coexpression Atlas	gudmap_developingLowerUrinaryTract_P2_bladder urothelium (LCM)_1000	DevelopingLowerUrinaryTract_P2_bladder urothelium (LCM)_emap-30380_top-relative-expression-ranked_1000	Gudmap Mouse MOE430.2	5.02e-26	2.04e-22	4.35e-24	3.87e-23	84	778	HEXB,ERBB3,GCNT3,ENPP1,TLCD4,MGAT4A,ATP8B1,ME1,SQOR,FAM3D,TTR,TUBA4A,POF1B,PLEKHH1,S100A6,NDRG1,PRR13,PLCB4,DEGS2,FXYD3,ALDOB,RBM47,PLS1,EPB41L4B,FA2H,ANXA4,CXCL14,XK,TMC4,CLDN7,VSIG10,CDCP1,MST1,TMEM45B,CCDC68,RAB11FIP5,OCLN,ATP1B1,SDCBP2,SORL1,TJP3,ABCC3,ANO9,PRSS8,GALNT3,ERAP1,PAQR5,ATP10B,GCNT1,TMBIM1,ITIH2,BMP2,PTPN3,KLF5,SEMA3B,DIAPH1,MARVELD3,TTC22,CPEB2,DPEP1,EGLN3,RAB25,AMN,ARRDC4,RBP4,L…
Coexpression	M39125	AIZARANI_LIVER_C24_EPCAM_POS_BILE_DUCT_CELLS_3	C8: Cell Type Signature	6.44e-26	6.19e-22	3.1e-23	3.02e-22	39	185	ERBB3,GCNT3,GOLM1,S100A6,CAMK2N1,CGN,MMP7,FXYD3,RBM47,ANPEP,KIAA1522,FA2H,ANXA4,CLDN3,CLDN7,MUC13,ATF3,ATP1A1,OCLN,ATP1B1,MUC1,SDCBP2,CEACAM6,BMP2,KLF5,NQO1,GPX2,TSPAN3,LGALS3,LGALS4,TFF3,ABLIM1,LMO7,TSPAN8,TM4SF4,ELF3,CD151,TM4SF1,EPCAM
Coexpression Atlas	gudmap_kidney_adult_JuxtaGlom_Ren1_Captopr_500	kidney_adult_JuxtaGlom_Ren1_Captopr_top-relative-expression-ranked_500	Gudmap Mouse MOE430.2	8.91e-26	3.63e-22	7.56e-24	6.72e-23	60	406	EPHX2,HGD,ENPP2,TMEM176A,HNF4A,SQOR,MEP1A,S100A6,TFCP2L1,NDRG1,SCNN1A,QPCT,UGT8,AK4,ABCG2,DEGS2,ABCC2,ALDOB,RBM47,SELENOP,AOAH,SLC1A1,SLC3A1,SLC9A3,TMEM45B,SLCO2A1,PCP4L1,ATP1A1,ATP1B1,FXYD2,CIDEB,PECR,GALNT3,MYO1D,TNFSF10,GATM,CDHR5,GCNT1,CFB,GGT1,TINAG,CHPT1,CALML4,CA2,SLC27A2,CA12,EGLN3,TCN2,TMT1B,GPX3,AHCYL2,PAPSS2,LACTB2,LMO7,ENTPD5,TSPAN8,TMPRSS2,TM4SF1,CDH16,STOM
Coexpression Atlas	gudmap_kidney single cell_adult_RenalCortexMixed_Scamp_k4_500	kidney single cell_adult_RenalCortexMixed_StemCellamp_k-means-cluster#4_top-relative-expression-ranked_500	Gudmap Mouse MOE430.2	1.01e-25	4.09e-22	8.35e-24	7.42e-23	59	393	EPHX2,HGD,TMEM176A,ME1,SQOR,MEP1A,SERPINA1,NDRG1,HPN,OSBPL9,SLC51A,SERPINF2,ALDOB,VIL1,SELENOP,RNF186,PRXL2B,DHRS11,CLDN7,SLC3A1,SLC51B,TMEM45B,ASL,ATP1B1,FXYD2,SOD3,CIDEB,PECR,PRSS8,GATM,PBLD,CDHR5,ACSS2,RETSAT,CFB,GGT1,APOM,TINAG,CHPT1,NQO1,CALML4,CA2,SLC27A2,DPEP1,TMT1B,RNF183,SLC44A4,PAPSS2,SGK2,SLC22A18,CRYL1,SLC44A1,SLC16A4,LACTB2,SUSD2,ENTPD5,TSPAN8,CDA,CDH16
Coexpression Atlas	gudmap_kidney_adult_CortVasc_Tie2_k1_1000	kidney_adult_CortVasc_Tie2_k-means-cluster#1_top-relative-expression-ranked_1000	Gudmap Mouse MOE430.2	1.11e-25	4.53e-22	9.06e-24	8.06e-23	53	314	HEXB,EPHX2,HGD,TMEM176A,HNF4A,ME1,SQOR,TUBA4A,MEP1A,SERPINA1,NDRG1,SCNN1A,UGT8,AK4,ABCG2,DEGS2,ABCC2,ALDOB,RBM47,SELENOP,AOAH,SLC1A1,SLC3A1,LRRC19,TMEM45B,ATP1B1,FXYD2,CIDEB,PECR,PRSS8,GALNT3,GATM,CDHR5,GCNT1,GGT1,TINAG,CHPT1,ATP11A,CALML4,CA2,SLC27A2,DPEP1,TCN2,TMT1B,GPX3,PAPSS2,SLC22A18,PLLP,C1orf115,LACTB2,TMPRSS2,CDA,CDH16
Coexpression Atlas	gudmap_kidney_P0_JuxtaGlom_Ren1_k4_1000	kidney_P0_JuxtaGlom_Ren1_k-means-cluster#4_top-relative-expression-ranked_1000	Gudmap Mouse MOE430.2	1.98e-25	8.07e-22	1.58e-23	1.41e-22	48	256	HGD,ENPP2,PFKP,HNF4A,SQOR,TUBA4A,MEP1A,TFCP2L1,NDRG1,UGT8,ABCC2,ALDOB,RBM47,PLS1,SGPP2,APOA2,SLC3A1,TMEM45B,CCDC68,ATP1A1,ATP1B1,FXYD2,SORL1,PRSS8,MYO6,GATM,PAQR5,GCNT1,GGT1,GGH,PTPN3,TINAG,CHPT1,CLRN3,CALML4,CA2,SLC27A2,TCN2,GPX3,GLB1L2,PAPSS2,ACE2,LACTB2,SUSD2,ENTPD5,TMPRSS2,EPCAM,CDH16
Coexpression	M4306	ONDER_CDH1_TARGETS_2_DN	C2:CGP: Chemical and Genetic Perturbations	4.92e-25	4.74e-21	2.26e-22	2.2e-21	58	473	ERBB3,F3,SERPINA1,TFCP2L1,CAMK2N1,NDRG1,HOOK1,MTUS1,SCNN1A,QPCT,ABCG2,CCL20,FXYD3,RBM47,ALOX15B,FLNB,EPB41L4B,CORO2A,MYO18A,TMPRSS4,CLDN7,CDCP1,SLC6A8,LSR,MISP,MCTP2,CXADR,SORL1,PRSS8,GALNT3,MYO1D,TNFSF10,RAPGEF5,CEACAM6,ISG20,PTAFR,ITGB4,CEACAM1,BMP2,PTPN3,FZD5,KLF5,SEMA3B,CA2,CA12,RAB25,RAB17,OAS3,LAMC2,MAP7,TFRC,ABLIM1,ELMO3,EFNA1,LRRC1,SERPINB1,LY75,EPCAM
Coexpression Atlas	gudmap_kidney_adult_RenalCortexMixed_Std_k2_1000	kidney_adult_RenalCortexMixed_Std_k-means-cluster#2_top-relative-expression-ranked_1000	Gudmap Mouse MOE430.2	1.31e-24	5.33e-21	1.03e-22	9.12e-22	49	279	LRRC66,ENPP1,ENPP2,HNF4A,TUBA4A,TFCP2L1,NDRG1,SCNN1A,ABCG2,ABCC2,ALDOB,RBM47,SELENOP,TMEM176B,AOAH,APOB,SLC9A3,TMEM45B,ASL,SLC22A5,ATP1B1,FXYD2,PECR,PRSS8,GALNT3,ABHD3,GATM,PAQR5,CDHR5,GCNT1,RETSAT,GGT1,PTPN3,CHPT1,CA2,SLC27A2,CA12,DPEP1,TCN2,GPX3,CXCL16,AHCYL2,PLLP,C1orf115,LACTB2,CLMN,ENTPD5,TMPRSS2,CDH16
Coexpression Atlas	gudmap_developingLowerUrinaryTract_e15.5_Urothelium_1000_k5	DevelopingLowerUrinaryTract_e15.5_Urothelium_emap-28091_k-means-cluster#5_top-relative-expression-ranked_1000	Gudmap Mouse MOE430.2	1.55e-24	6.3e-21	1.19e-22	1.06e-21	49	280	CNKSR1,ERBB3,MGAT4A,ATP8B1,F3,FAM3D,POF1B,PLEKHH1,TFCP2L1,CGN,PLS1,ANG,EPB41L4B,CORO2A,TMC4,CLDN3,CLDN7,CDCP1,TMEM45B,RHPN2,SLCO2A1,CCDC68,OCLN,ATP1B1,MCTP2,ACSL5,SORL1,TJP3,ABCC3,PRSS8,GALNT3,MYO1D,MYO6,ATP10B,GCNT1,KLF5,COBL,MARVELD3,RAB17,SLC26A2,LAMC2,GLB1L2,LGALS3,LLGL2,TSPAN8,TMPRSS2,PRR15,EPCAM,CDH17
Coexpression	MM1326	LIM_MAMMARY_STEM_CELL_DN	M2:CGP: Chemical and Genetic Perturbations	2.18e-24	2.09e-20	9.52e-22	9.28e-21	55	436	HDHD3,ERBB3,CEACAM5,TLCD4,CEACAM7,GOLM1,SQOR,ABHD17C,TFCP2L1,MTA3,MTUS1,HPN,PRR13,CGN,RBM47,VIPR1,CORO2A,KIAA1522,CAMSAP3,TMC4,CLDN3,CLDN7,LSR,RHPN2,ATP1B1,MUC1,SDCBP2,SORL1,TJP3,ANO9,IQGAP2,TMEM135,CEACAM6,ISG20,CEACAM1,CHPT1,VILL,COBL,MARVELD3,DMBT1,MVP,CA2,RAB25,ARRDC4,SLC44A4,PNPO,SFXN1,SLC22A18,SLC35A3,ELMO3,P2RX4,PAK1,TMPRSS2,ELF3,EPCAM
Coexpression Atlas	gudmap_kidney_adult_RenalCortexMixed_Std_k2_500	kidney_adult_RenalCortexMixed_Std_k-means-cluster#2_top-relative-expression-ranked_500	Gudmap Mouse MOE430.2	3.33e-24	1.35e-20	2.51e-22	2.23e-21	46	248	HEXB,EPHX2,HGD,TMEM176A,ME1,SQOR,TTR,TUBA4A,MEP1A,SERPINA1,UGT8,AK4,DEGS2,SLC51A,PLS1,VIL1,ANPEP,APOA2,SLC1A1,SLC3A1,SLC51B,LRRC19,TMEM45B,CIDEB,ACSS2,ANKS4B,RETSAT,APOM,TINAG,SULT1B1,CHPT1,CLRN3,ATP11A,CALML4,DPEP1,TMT1B,SLC19A3,GLB1L2,SLC44A4,PAPSS2,ACE2,SLC22A18,CRYL1,SLC16A4,SUSD2,CDA
Coexpression Atlas	gudmap_developingKidney_e15.5_early proxim tubul_200	DevelopingKidney_e15.5_early proxim tubul_emap-28005_top-relative-expression-ranked_200	Gudmap Mouse MOE430.2	3.8e-24	1.55e-20	2.81e-22	2.5e-21	37	151	CHDH,HNF4A,TTR,MEP1A,AFP,HPN,FGB,SERPINF2,ALDOB,VIL1,APOA1,APOA4,APOB,SLC3A1,TMEM45B,UNC5CL,FXYD2,CIDEB,PRSS8,CDHR2,KIF12,CFB,GGT1,APOM,TINAG,CLRN3,SLC39A5,SLC27A2,DPEP1,DPP4,AMN,TMT1B,SLC44A4,SGK2,SUSD2,TMPRSS2,CDH16
Coexpression	M39111	AIZARANI_LIVER_C7_EPCAM_POS_BILE_DUCT_CELLS_2	C8: Cell Type Signature	4.6e-24	4.42e-20	1.92e-21	1.88e-20	40	219	ERBB3,GOLM1,CKB,S100A6,CAMK2N1,AGT,MMP7,VEGFA,ANPEP,KIAA1522,ANXA4,CLDN3,CLDN7,ATF3,ATP1A1,OCLN,ATP1B1,FXYD2,CXADR,SOD3,ABCC3,CYP3A5,KIF12,BMP2,KLF5,COBL,C12orf75,SLC17A4,LAMC2,LGALS4,ABLIM1,LLGL2,CLMN,TM4SF4,TMPRSS2,ELF3,CD151,TM4SF1,EPCAM,SERPINA5
Coexpression Atlas	gudmap_developingKidney_e15.5_Medullary collecting duct_500	DevelopingKidney_e15.5_Medullary collecting duct_emap-28063_top-relative-expression-ranked_500	Gudmap Mouse MOE430.2	4.71e-24	1.92e-20	3.42e-22	3.04e-21	57	394	RGMB,CNKSR1,GCNT3,MGAT4A,ATP8B1,FAM3D,POF1B,PLAC8,TFCP2L1,HOXD1,HPN,UGT8,PLAG1,DEGS2,FXYD3,RBM47,VEGFA,RNF186,SGPP2,TMC4,CLDN3,CLDN7,TMEM45B,RHPN2,ATP1A1,OCLN,C1QTNF12,ATP1B1,MUC1,PRDM16,SORL1,TJP3,ABCC3,PRSS8,GALNT3,PAQR5,KIF12,ATP10B,GDNF,GJB1,TINAG,CHPT1,MARVELD3,NPNT,DPP4,RAB17,GLB1L2,SLC44A4,LGALS3,TFRC,USP2,TSPAN8,TMPRSS2,EPCAM,PADI2,CDH4,CDH16
Coexpression	M2435	WAMUNYOKOLI_OVARIAN_CANCER_GRADES_1_2_UP	C2:CGP: Chemical and Genetic Perturbations	9.19e-24	8.84e-20	3.68e-21	3.59e-20	33	140	ERBB3,ATP8B1,PLAC8,ABHD17C,PLS1,VSIG10,GDA,BRI3BP,DOK4,UNC5CL,RASEF,ATP1B1,MUC1,ABCC3,GALNT3,IQGAP2,MYO6,PBLD,HEPH,GGT1,FZD5,KLF5,NQO1,CA2,MAP7,SFXN1,SLC35A3,LLGL2,RASSF6,ARHGAP12,TSPAN8,SLC39A14,EPCAM
Coexpression Atlas	Arv_SC-hpx_blastocyst_1000_K2	AravindRamakr_StemCell-hypoxiaGrown_fromBlastocyst-derived-humanEmbryonicStemCells_top-relative-expression-ranked_1000_k-means-cluster#2	PCBC	9.2e-24	3.74e-20	6.57e-22	5.84e-21	47	266	CEACAM5,AOC1,GCNT3,CEACAM7,FAM3D,FABP1,MEP1A,MUC17,CCL20,FXYD3,ALDOB,ALPI,EPB41L4B,PRR15L,TMPRSS4,APOA4,CLDN7,MUC13,GDA,MISP,TRIB3,TMEM45B,C15orf48,MUC4,PRSS8,MYO1A,CDHR2,FAM83E,CEACAM6,CDHR5,EPS8L3,CREB3L3,DMBT1,PHGR1,SLC39A5,TRIM15,SLC26A3,RAB25,LINC01559,GPX2,TRIM31,SLC44A4,LGALS4,TFF3,TSPAN8,GPA33,CDH17
Coexpression	M246	ANDERSEN_CHOLANGIOCARCINOMA_CLASS2	C2:CGP: Chemical and Genetic Perturbations	1.26e-23	1.21e-19	4.83e-21	4.71e-20	36	175	CDX2,CEACAM5,HK2,GCNT3,CYP2S1,PLAC8,TFCP2L1,MUC17,QPCT,PLAUR,FXYD3,CORO2A,FA2H,TMPRSS4,SLC39A4,CDCP1,MISP,C15orf48,ARHGAP27,TJP3,SPIRE2,MYO1A,CEACAM6,MTMR11,VILL,KLF5,GPR35,TRIM31,GALNT12,LAMC2,LGALS3,LGALS4,SLC16A3,GPA33,SLC6A14,CDH17
GO: Cellular Component	GO:0045177	apical part of cell		1.54e-23	9.6e-21	4.8e-21	3.37e-20	70	604	ERBB3,CEACAM5,SLCO2B1,CEACAM7,ATP8B1,FABP1,HAVCR1,CLIC5,MUC17,HPN,NPC1L1,SCNN1A,ABCG2,ABCC2,MUC20,DUOXA2,EPB41L4B,ANXA4,DUOX2,SLC39A4,MUC13,SLC1A1,ABCC6,SLC3A1,SLC6A8,SLC9A3,SHROOM1,SLC15A1,SLC22A5,ATP1A1,OCLN,ATP1B1,MUC1,MUC4,IL6R,TJP3,SLC36A1,MYO1A,MYO6,MYO7B,CDHR2,CEACAM6,CDHR5,SLC46A1,CEACAM1,ITPR3,PTPRH,SLC38A3,CA2,CA12,DPEP1,DPP4,SLC26A3,SLC11A2,RAB17,AMN,SLC26A2,SLC17A4,SLC44A4,USH1C,TF,AC…
Coexpression Atlas	liver	liver	Human Protein Atlas	1.8e-23	7.33e-20	1.26e-21	1.12e-20	58	419	HGD,TLCD4,FOXA3,F2,HNF4A,TTR,LRG1,FABP1,SERPINA1,SERPINA4,AFP,HPN,AGT,FGB,ABCC2,PLG,SLC51A,SERPINF2,ALDOB,GLTPD2,OSGIN1,VTN,ANG,MOGAT2,CP,APOA1,APOA2,APOB,ABCC6,MST1,MTTP,CYP2B6,CYP3A5,CYP27A1,GATM,CDHR5,ELOVL2,ITIH2,CFB,GJB1,NR1I2,CLRN3,CREB3L3,SLC39A5,SLC38A3,SLC27A2,INHBE,TMPRSS6,TMT1B,RBP4,SLC17A4,TF,ORM1,RNASE4,PCSK6,ENTPD5,TM4SF4,SERPINA5
Coexpression	M19982	WAMUNYOKOLI_OVARIAN_CANCER_LMP_UP	C2:CGP: Chemical and Genetic Perturbations	2.61e-23	2.51e-19	9.64e-21	9.4e-20	43	270	ERBB3,MGLL,ATP8B1,TUBA4A,PLAC8,ABHD17C,PLEKHH1,S100A6,CAMK2N1,FXYD3,PLS1,FLNB,PRXL2B,FA2H,SGPP2,MYO18A,VSIG10,DOK4,UNC5CL,RASEF,ARHGAP27,FUT2,ATP1B1,MUC1,TJP3,ABCC3,GALNT3,IQGAP2,MYO6,TNFSF10,CHPT1,KLF5,NQO1,TTC22,MVP,RAB25,SLC35A3,LLGL2,INF2,TSPAN8,SERPINB1,ELF3,EPCAM
Coexpression Atlas	gudmap_developingKidney_e15.5_early proxim tubul_1000_k1	DevelopingKidney_e15.5_early proxim tubul_emap-28005_k-means-cluster#1_top-relative-expression-ranked_1000	Gudmap Mouse MOE430.2	3e-23	1.22e-19	2.07e-21	1.84e-20	40	191	EPHX2,TMEM144,AOC1,SLCO2B1,CYP2S1,F2,TTR,CLIC5,FCGRT,AFP,FGB,ABCC2,BNIP5,MOGAT2,PRR15L,SLC39A4,APOA1,APOA2,APOA4,APOB,MUC13,TMEM37,MTTP,CDHR5,ANKS4B,RETSAT,SLC36A2,CFB,APOM,EPS8L3,MVP,DPEP1,GPX3,RBP4,TF,TFF3,SLC22A18,CRYL1,ABLIM1,CDA
Coexpression Atlas	GSM854302_500	Stromal Cells, Ep.MEChi.Th, CD45-EpCAm+Ly51-MHCIIhi, Thymus, avg-1	Immgen.org, GSE15907	4.02e-23	1.64e-19	2.73e-21	2.43e-20	57	411	AOC1,ACHE,TMEM176A,HNF4G,ME1,MEP1A,CLIC5,HOOK1,MUC17,SCD,SCNN1A,PLCB4,CCL20,RBM47,PLS1,FLNB,BNIP5,TMEM176B,UBD,ANXA4,TMPRSS4,APOA1,APOA4,TMC4,MUC13,CDCP1,GDA,PLPP3,CADPS,SLCO2A1,RASEF,ATF3,ATP1B1,MUC1,MYO6,RAPGEF5,GATM,CDHR5,TNFRSF11A,ANKS4B,CFB,BMP2,HNF1A,GPX3,LAMC2,CXCL16,AHCYL2,PAPSS2,TNFRSF11B,RASSF6,SUSD2,SERPINB1,PAM,ELF3,NOSTRIN,EPCAM,CDH17
Coexpression Atlas	ratio_EB-blastocyst_vs_EB-cbCD34_1000_K2	ratio_EmbryoidBody-blastocyst_vs_EmbryoidBody-derived-from_CD34-iPSC_top-relative-expression-ranked_1000_k-means-cluster#2	PCBC	5.74e-23	2.34e-19	3.83e-21	3.4e-20	48	290	CDX2,FOXA3,F2,HNF4A,FABP1,MEP1A,TMEM132C,HAVCR1,SERPINA1,AFP,HPN,FGB,PLG,SERPINF2,ALDOB,ALOX15B,VIL1,FA2H,APOA1,APOA2,APOA4,APOB,SLC3A1,MTTP,OCLN,URAD,CDHR5,ITIH2,APOM,GJB1,LCN15,EPS8L3,CREB3L3,SLC39A5,GNRH2,DPEP1,SLC26A3,RAB17,AMN,GPX2,RBP4,SLC44A4,TF,ORM1,LLGL2,TM4SF4,CCDC183,CDH17
Coexpression Atlas	gudmap_developingKidney_e15.5_1000_k5	DevelopingKidney_e15.5_anlage of loop of Henle_emap-31283_k-means-cluster#5_top-relative-expression-ranked_1000	Gudmap Mouse MOE430.2	6.16e-23	2.51e-19	4.05e-21	3.6e-20	34	133	HNF4A,TTR,TUBA4A,MEP1A,PLEKHH1,CAMK2N1,AFP,ALDOB,RBM47,ATP1A1,ATP1B1,FXYD2,PRSS8,PAQR5,KIF12,GCNT1,STEAP2,GGT1,TINAG,CHPT1,CLRN3,SLC39A5,SLC27A2,DPP4,RAB17,AMN,MAP7,SGK2,USP2,MLXIPL,RASSF6,TMPRSS2,PAM,CDH16
Coexpression	M2574	LIM_MAMMARY_STEM_CELL_DN	C2:CGP: Chemical and Genetic Perturbations	6.34e-23	6.1e-19	2.26e-20	2.2e-19	52	416	HDHD3,ERBB3,TLCD4,GOLM1,SQOR,ABHD17C,TFCP2L1,MTA3,MTUS1,HPN,PRR13,CGN,RBM47,VIPR1,CORO2A,KIAA1522,CAMSAP3,TMC4,CLDN3,CLDN7,LSR,RHPN2,ATP1B1,MUC1,SDCBP2,SORL1,TJP3,ANO9,IQGAP2,TMEM135,ISG20,CEACAM1,CHPT1,VILL,COBL,MARVELD3,DMBT1,MVP,CA2,RAB25,ARRDC4,SLC44A4,PNPO,SFXN1,SLC22A18,SLC35A3,ELMO3,P2RX4,PAK1,TMPRSS2,ELF3,EPCAM
Coexpression	M13283	HSIAO_LIVER_SPECIFIC_GENES	C2:CGP: Chemical and Genetic Perturbations	7.6e-23	7.31e-19	2.61e-20	2.55e-19	41	249	HGD,SERPINF1,F2,TTR,FABP1,SERPINA1,HPN,AGT,FGB,ABCC2,PLG,SERPINF2,ALDOB,PLOD2,SELENOP,VTN,ANG,CP,APOA1,APOA2,APOB,ABCC6,MST1,LSR,ASL,MTTP,CYP2B6,CYP27A1,GATM,ITIH2,CFB,GJB1,SLC38A3,RBP4,TF,LGALS4,ORM1,PCSK6,TM4SF4,SLC39A14,SERPINA5
Coexpression Atlas	facebase_RNAseq_e10.5_OlfacPit_2500_K1	facebase_RNAseq_e10.5_OlfacPit_2500_K1	Gudmap RNAseq	7.93e-23	3.23e-19	5.12e-21	4.55e-20	56	402	CNKSR1,ERBB3,MGAT4A,TUBA4A,DSCAML1,POF1B,PLEKHH1,HOOK1,MTUS1,SH3RF2,SCD,CGN,FBXO32,FXYD3,RBM47,PLS1,CORO2A,CAMSAP3,PRR15L,CLDN3,CLDN7,CDCP1,LPIN3,LSR,CADPS,CCDC68,RASEF,OCLN,ATP1B1,MCTP2,ACSL5,MXI1,SORL1,TJP3,ANO9,PRSS8,GALNT3,RNF43,ITIH2,PTPN3,VILL,KLF5,MARVELD3,RAB3B,SLC27A2,RAB25,GPX2,LAMC2,MAP7,ELMO3,LLGL2,RASSF6,KIAA1217,ENTPD5,ELF3,EPCAM
Coexpression	M39118	AIZARANI_LIVER_C14_HEPATOCYTES_2	C8: Cell Type Signature	1.49e-22	1.43e-18	4.94e-20	4.82e-19	39	226	HGD,TLCD4,SERPINF1,TMEM176A,F2,TTR,LRG1,FABP1,SERPINA1,SCD,HPN,FGB,PLG,SERPINF2,ALDOB,VTN,ANG,TMEM176B,CP,APOA1,APOA2,APOB,MST1,IGF2,CYP2B6,INSIG1,CYP27A1,GATM,PBLD,CFB,APOM,GJB1,GPX2,GPX3,RBP4,TF,CRYL1,ORM1,MLXIPL
Coexpression Atlas	PCBC_ctl_BronchioEpithel_1000	Progenitor-Cell-Biology-Consortium_reference_BronchioEpithel_top-relative-expression-ranked_1000	PCBC	1.52e-22	6.16e-19	9.63e-21	8.56e-20	90	990	CNKSR1,CEACAM5,GCNT3,CARD10,ATP8B1,CYP2S1,KLF4,ME1,F3,SQOR,FAM3D,TUBA4A,LRG1,POF1B,S100A6,TFCP2L1,NDRG1,SH3RF2,SCNN1A,CCL20,FXYD3,ALOX15B,VEGFA,SEMA4B,EPB41L4B,CORO2A,KIAA1522,ERO1A,FA2H,SGPP2,TMEM253,TMPRSS4,SLC39A4,TMC4,CLDN7,CDCP1,TXNIP,LSR,GDA,MISP,TRIB3,TMEM45B,C15orf48,CCDC68,RASEF,FUT2,RNF39,SDCBP2,MCTP2,ABCC3,ANO9,PRSS3,PRSS8,GALNT3,TNFSF10,TNFSF9,FAM83E,CEACAM6,PTAFR,IL22RA1,ITGB4,RNF43,…
Coexpression Atlas	mendel_RNAseq_e12.5_Urothelium_ShhCreRFP_2500	mendel_RNAseq_e12.5_Urothelium_ShhCreRFP_2500	Gudmap RNAseq	1.83e-22	7.46e-19	1.15e-20	1.02e-19	127	1770	TSPAN15,CNKSR1,ERBB3,HINT1,SYN3,RIMKLA,ENPP1,MGAT4A,WIPF3,ATP8B1,CYP2S1,F3,SQOR,TUBA4A,POF1B,PLEKHH1,S100A6,CAMK2N1,HOXD1,HOOK1,HPCAL1,PRELID2,SH3RF2,AFP,SCD,PRR13,CGN,AK4,FBXO32,FXYD3,RBM47,PLS1,BAIAP2L2,OSGIN1,HSD17B7,ANG,EPB41L4B,CORO2A,KIAA1522,FA2H,CAMSAP3,PRR15L,SLC39A4,XK,TMC4,CLDN3,CLDN7,VSIG10,CDCP1,BHLHE40,ZFP36,SEMA4G,HAPLN1,LSR,RHPN2,CADPS,SLCO2A1,RASEF,OCLN,ATP1B1,MCTP2,CXADR,MXI1,SO…
Coexpression	M40012	BUSSLINGER_GASTRIC_IMMATURE_PIT_CELLS	C8: Cell Type Signature	2.08e-22	2e-18	6.67e-20	6.5e-19	34	165	CEACAM5,MGLL,CYP2S1,KLF4,PLAC8,S100A6,SMPD3,FXYD3,RBM47,FLNB,ANG,FA2H,CTNNA1,MAPK3,MUC1,ABCC3,CYP3A5,ITGB4,CAPN8,VILL,NQO1,PHGR1,CA2,TCF7L2,GPX2,TSPAN3,LGALS3,TFF2,LGALS4,ABLIM1,SLC44A1,LMO7,RASSF6,TSPAN8
GO: Cellular Component	GO:0098862	cluster of actin-based cell projections		2.64e-22	1.65e-19	5.51e-20	3.87e-19	43	237	CEACAM5,CEACAM7,ATP8B1,HAVCR1,CLIC5,MUC17,PIK3CB,NPC1L1,CGN,ABCG2,ABCC2,PLS1,ALPI,VIL1,FLNB,ANPEP,CORO2A,MYO18A,SLC3A1,SLC9A3,SLC15A1,SLC22A5,MTTP,MYO1A,MYO1D,MYO6,MYO7B,CDHR2,CEACAM6,CDHR5,SLC46A1,ANKS4B,CEACAM1,ITPR3,DIAPH1,ESPN,SLC26A3,SLC11A2,AMN,SLC17A4,USH1C,ACE2,SLC6A14
Coexpression Atlas	mendel_RNAseq_e12.5_Urothelium_ShhCreRFP_2500_K1	mendel_RNAseq_e12.5_Urothelium_ShhCreRFP_2500_K1	Gudmap RNAseq	4.69e-22	1.91e-18	2.89e-20	2.57e-19	55	402	ERBB3,ENPP1,MGAT4A,ATP8B1,CYP2S1,SQOR,TUBA4A,POF1B,PLEKHH1,S100A6,PRELID2,SH3RF2,CGN,FXYD3,RBM47,OSGIN1,ANG,CORO2A,KIAA1522,FA2H,TMC4,CDCP1,BHLHE40,ZFP36,SEMA4G,LSR,SLCO2A1,RASEF,ATP1B1,MCTP2,SORL1,ANO9,PRSS8,GALNT3,HCAR1,GCNT1,IL22RA1,ITGB4,ITIH2,ITPR3,PTPN3,KLF5,MARVELD3,RAB3B,RAB25,LAMC2,MAP7,LGALS3,RNASE4,ELMO3,LLGL2,RASSF6,TSPAN8,TMPRSS2,ELF3
GO: Cellular Component	GO:0016324	apical plasma membrane		6.98e-22	4.36e-19	1.09e-19	7.66e-19	61	497	ERBB3,CEACAM5,SLCO2B1,CEACAM7,ATP8B1,HAVCR1,CLIC5,MUC17,HPN,NPC1L1,SCNN1A,ABCG2,ABCC2,MUC20,ANXA4,DUOX2,SLC39A4,MUC13,SLC1A1,ABCC6,SLC3A1,SLC6A8,SLC9A3,SHROOM1,SLC15A1,SLC22A5,ATP1A1,OCLN,ATP1B1,MUC1,MUC4,IL6R,TJP3,SLC36A1,MYO1A,CDHR2,CEACAM6,CDHR5,SLC46A1,CEACAM1,PTPRH,SLC38A3,CA12,DPEP1,DPP4,SLC26A3,SLC11A2,RAB17,AMN,SLC26A2,SLC17A4,SLC44A4,TF,ACE2,SLC22A18,SLC16A3,LMO7,SCARB1,SLC39A14,EPCAM,SL…
Coexpression Atlas	gudmap_developingKidney_e15.5_S-shaped body_1000_k3	DevelopingKidney_e15.5_S-shaped body_emap-27855_k-means-cluster#3_top-relative-expression-ranked_1000	Gudmap Mouse MOE430.2	1.18e-21	4.8e-18	7.17e-20	6.37e-19	37	176	HLA-DMB,ENPP2,HNF4A,TUBA4A,MEP1A,PLEKHH1,SERPINA1,HPN,SERPINF2,ALDOB,RBM47,VIL1,SLC1A1,MISP,UNC5CL,ATP1B1,FXYD2,PRSS8,PAQR5,KIF12,GCNT1,ANKS4B,STEAP2,ELOVL2,GGT1,APOM,TINAG,CLRN3,SLC39A5,SLC27A2,CA12,DPP4,AMN,MAP7,ACE2,ENTPD5,PRR15
Coexpression	M39115	AIZARANI_LIVER_C11_HEPATOCYTES_1	C8: Cell Type Signature	1.4e-21	1.35e-17	4.34e-19	4.23e-18	43	298	HGD,ENPP1,TLCD4,SERPINF1,TMEM176A,F2,TTR,LRG1,FABP1,SERPINA1,SCD,HPN,AGT,FGB,PLG,SERPINF2,ALDOB,VTN,ANG,TMEM176B,CP,APOA1,APOA2,APOB,MST1,IGF2,MTTP,CYP2B6,CYP3A5,INSIG1,CYP27A1,GATM,PBLD,ITIH2,CFB,APOM,GGH,SLC27A2,RBP4,TF,ORM1,MLXIPL,SLC39A14
Coexpression Atlas	gudmap_kidney_e15.5_Podocyte_MafB_k4_1000	kidney_e15.5_Podocyte_MafB_k-means-cluster#4_top-relative-expression-ranked_1000	Gudmap Mouse MOE430.2	1.86e-21	7.57e-18	1.11e-19	9.89e-19	45	274	ENPP2,TMEM176A,HNF4A,TUBA4A,MEP1A,TFCP2L1,HOOK1,UGT8,ALDOB,RBM47,PLS1,VIL1,SELENOP,ANPEP,SGPP2,SLC3A1,TMEM37,OCLN,ATP1B1,FXYD2,CIDEB,PECR,GALNT3,KIF12,GCNT1,ANKS4B,STEAP2,ELOVL2,GGT1,PTPN3,TINAG,CHPT1,CLRN3,CALML4,CA2,SLC27A2,GLB1L2,MAP7,PAPSS2,ACE2,LACTB2,ENTPD5,TMPRSS2,EPCAM,CDH16
Coexpression Atlas	gudmap_kidney_P0_JuxtaGlom_Ren1_1000	kidney_P0_JuxtaGlom_Ren1_top-relative-expression-ranked_1000	Gudmap Mouse MOE430.2	4.73e-21	1.93e-17	2.79e-19	2.48e-18	83	905	HGD,HLA-DMB,ENPP2,MGLL,PFKP,HNF4A,F3,SQOR,TUBA4A,PLAC8,MEP1A,S100A6,ADORA1,TFCP2L1,NDRG1,MTUS1,AFP,SCD,UGT8,ABCC2,ALDOB,RBM47,PLOD2,PLS1,ANPEP,SGPP2,APOA2,CLDN7,SLC3A1,TXNIP,IGF2,TMEM45B,SLCO2A1,CCDC68,PCP4L1,ATP1A1,ATP1B1,FXYD2,PRDM16,IL2RG,SORL1,PRSS8,MYO1D,IQGAP2,MYO6,RAPGEF5,NAGA,GATM,PAQR5,GCNT1,GGT1,GGH,PTPN3,TINAG,CHPT1,VILL,CLRN3,CALML4,CA2,SLC27A2,NPNT,DPP4,P4HA2,EGLN3,STBD1,TCN2,GPX3,LA…
Coexpression Atlas	gudmap_developingLowerUrinaryTract_e15.5_urothelium_500	DevelopingLowerUrinaryTract_e15.5_Urothelium_emap-28091_top-relative-expression-ranked_500	Gudmap Mouse MOE430.2	6.04e-21	2.46e-17	3.51e-19	3.12e-18	53	394	ERBB3,GCNT3,MGAT4A,ATP8B1,LDOC1,HNF4A,F3,FAM3D,TTR,POF1B,PLEKHH1,S100A6,HOXD1,AFP,UGT8,FXYD3,RBM47,CLDN3,CLDN7,CDCP1,IGF2,TMEM45B,RHPN2,SLCO2A1,CCDC68,OCLN,C1QTNF12,PRDM16,SORL1,ABCC3,PRSS8,GALNT3,PAQR5,ATP10B,GCNT1,ITIH2,TINAG,KLF5,MARVELD3,SLC27A2,NPNT,DPP4,RAB17,LAMC2,GLB1L2,LGALS3,TFRC,RNASE4,TSPAN8,TMPRSS2,PRR15,EPCAM,CDH16
Coexpression Atlas	gudmap_kidney_adult_JuxtaGlom_Ren1_k1_500	kidney_adult_JuxtaGlom_Ren1_k-means-cluster#1_top-relative-expression-ranked_500	Gudmap Mouse MOE430.2	7.44e-21	3.03e-17	4.24e-19	3.77e-18	36	174	EPHX2,HGD,TMEM176A,ME1,SQOR,TUBA4A,MEP1A,UGT8,AK4,DEGS2,ABCC2,AOAH,SLC1A1,SLC3A1,SLC51B,LRRC19,CIDEB,PECR,PRSS8,GALNT3,ABHD3,RETSAT,TINAG,CHPT1,ATP11A,CALML4,CA2,DPEP1,TMT1B,GLB1L2,SLC44A4,PAPSS2,SLC22A18,CRYL1,LACTB2,ENTPD5
Coexpression Atlas	mendel_RNAseq_e18.5_Urothelium_Krt5CreRFP_2500_K4	mendel_RNAseq_e18.5_Urothelium_Krt5CreRFP_2500_K4	Gudmap RNAseq	7.5e-21	3.05e-17	4.24e-19	3.77e-18	104	1337	HEXB,EPHX2,ENPP1,MGAT4A,TMEM176A,ATP8B1,CYP2S1,PFKP,ME1,SQOR,FAM3D,TTR,TUBA4A,POF1B,PLEKHH1,ADORA1,MGAT3,HOOK1,MTUS1,PRELID2,SH3RF2,PRR13,FXYD3,RBM47,PLS1,OSGIN1,VEGFA,SEMA4B,FLNB,HSD17B7,ANG,EPB41L4B,CORO2A,KIAA1522,FA2H,ANXA4,AGPAT2,PPARA,VSIG10,CPT1A,BHLHE40,ZFP36,SEMA4G,LPIN3,MST1,SLC6A8,GDA,TMEM45B,ASL,NT5C2,CCDC68,ATF3,CTNNA1,ARHGAP27,ATP1A1,FUT2,ATP1B1,SDCBP2,MCTP2,ACSL5,MXI1,SORL1,ABCC3,G…
Coexpression Atlas	GSM777041_500	Stromal Cells, Ep.MEChi.Th, CD45- EpCAm+ Ly51- MHCIIhi, Thymus, avg-2	Immgen.org, GSE15907	1.06e-20	4.32e-17	5.92e-19	5.27e-18	52	384	AOC1,ACHE,TMEM176A,HNF4G,ME1,FAM3D,MEP1A,CLIC5,MUC17,SCD,SCNN1A,CCL5,PLCB4,CCL20,RBM47,PLS1,FLNB,TMEM176B,UBD,ANXA4,TMPRSS4,APOA1,APOA4,TMC4,CDCP1,GDA,PLPP3,CADPS,SLCO2A1,RASEF,ATP1B1,MUC1,MYO6,RAPGEF5,GATM,CDHR5,TNFRSF11A,CFB,BMP2,HNF1A,GPX3,LAMC2,AHCYL2,PAPSS2,TNFRSF11B,RASSF6,SUSD2,SERPINB1,PAM,NOSTRIN,EPCAM,CDH17
Coexpression Atlas	PCBC_ratio_EB blastocyst_vs_EB amniotic fluid MSC_cfr-2X-p05	EB blastocyst_vs_EB amniotic fluid MSC-Confounder_removed-fold2.0_adjp0.05	PCBC_AltAnalyze	1.2e-20	4.86e-17	6.57e-19	5.84e-18	46	300	TSPAN15,ERBB3,CDX2,F2,ME1,F3,TMEM132C,HAVCR1,SERPINA1,NDRG1,HPN,AGT,FGB,SELENOP,VTN,APOA1,APOA2,APOB,SLC1A1,HAPLN1,COL23A1,IGF2,TRIB3,DOK4,FRZB,ERAP1,CYP27A1,GCNT1,TMBIM1,GGT1,APOM,GNRH2,NPNT,NDNF,DPP4,P4HA2,PAPSS2,TF,LGALS3,TGFBR3,LLGL2,P4HA1,SERPINB1,EPCAM,CDH17,STOM
Coexpression	M2903	LEF1_UP.V1_DN	C6: Oncogenic Signature	1.43e-20	1.38e-16	4.31e-18	4.2e-17	34	187	TMEM144,CDX2,PLAC8,CCL20,RBM47,CXCL5,PLOD2,SELENOP,PRR15L,XK,SLC1A1,ATP1B1,ACSL5,SORL1,PRSS8,TMEM135,FAM83E,VILL,MVP,DPP4,RAB25,RBP4,OAS3,GALNT12,SLC44A4,PAPSS2,SLC22A18,PLLP,C1orf115,TSPAN8,PAK1,ELF3,TM4SF1,CDH17
Coexpression Atlas	gudmap_RNAseq_p2_Glomerlular Endothelial_2500	gudmap_RNAseq_p2_Glomerlular Endothelial_2500	Gudmap RNAseq	1.95e-20	7.95e-17	1.06e-18	9.42e-18	119	1685	TSPAN15,PCSK5,ACHE,TMEM176A,CARD10,MGLL,ATP8B1,PFKP,ACVRL1,KLF4,SQOR,LRG1,PLAC8,CKB,S100A6,SERPINA1,MFNG,NDRG1,CLIC5,SEMA6D,MTUS1,HPCAL1,FCGRT,PIK3CB,SCD,PRR13,OSBPL9,CCL5,PLAUR,FBXO32,VEGFA,SELENOP,TMEM176B,ANXA4,AGPAT2,CP,VSIG10,CPT1A,BHLHE40,ZFP36,IFNGR1,TXNIP,GDA,AATK,C1orf226,DOK4,PLPP3,SLCO2A1,TMEM37,PCP4L1,ATF3,MAPK3,ARHGAP27,ATP1A1,ATP2A3,IL2RG,CTSS,ACSL5,ABCC3,MYO1D,MYO6,TNFSF10,ERAP1,RA…
Coexpression Atlas	gudmap_kidney_adult_JuxtaGlom_Ren1_k2_1000	kidney_adult_JuxtaGlom_Ren1_k-means-cluster#2_top-relative-expression-ranked_1000	Gudmap Mouse MOE430.2	2.44e-20	9.93e-17	1.31e-18	1.16e-17	48	333	ENPP2,PFKP,HNF4A,TFCP2L1,NDRG1,SCNN1A,ABCG2,ABCC2,SERPINF2,ALDOB,RBM47,SELENOP,AOAH,SGPP2,APOB,CPT1A,SLC6A8,SLC9A3,TMEM37,ATP1A1,ATP1B1,FXYD2,SORL1,PRSS8,SLC36A1,GATM,PAQR5,CDHR5,GCNT1,CFB,GGT1,PTPN3,PTPRJ,SLC27A2,CA12,TCN2,GPX3,AHCYL2,MAP7,USH1C,SGK2,MLXIPL,LACTB2,CLMN,ENTPD5,TMPRSS2,PC,CDH16
Coexpression Atlas	gudmap_kidney_adult_RenalCapsule_1000	kidney_adult_RenalCapsule_top-relative-expression-ranked_1000	Gudmap Mouse MOE430.2	2.55e-20	1.04e-16	1.35e-18	1.2e-17	75	778	HEXB,HLA-DMA,SERPINF1,TMEM176A,MGLL,CYP2S1,PFKP,F3,SQOR,PLAC8,S100A6,HOXC6,NDRG1,MTUS1,FCGRT,SH3RF2,SCD,FXYD3,PLOD2,USP53,SELENOP,TMEM176B,ANPEP,ANXA4,CP,IFNGR1,TXNIP,PLPP3,RHPN2,SLCO2A1,FRZB,CTSS,CXADR,TTC39B,MYO1D,ERAP1,SPOCK2,GCNT1,TMBIM1,ITIH2,CFB,SULT1A1,KLF5,DIAPH2,COBL,CALML4,SLC27A2,NPNT,DPP4,GPX3,RBP4,LAMA2,CXCL16,PAPSS2,TF,TNFRSF11B,LGALS9,GREM2,RSPO3,TGFBR3,SLC44A1,RNASE4,SLC16A4,LMO7,…
Coexpression Atlas	Facebase_ST1_Univ_500	UniversalReference_WholeMouseP1_top-relative-expression-ranked_500	FaceBase_ST1	4.56e-20	1.86e-16	2.38e-18	2.12e-17	54	427	EPHX2,HGD,MGLL,F2,ME1,F3,TTR,LRG1,FABP1,SERPINA1,FCGRT,AFP,AGT,FGB,DEGS2,PLG,SLC51A,ALDOB,SELENOP,VTN,AGPAT2,CXCL14,APOA1,APOA2,APOA4,CLDN3,ATP1B1,ACSL5,NAGA,IRF7,ISG20,ITIH2,CFB,APOM,GJB1,SULT1A1,CHPT1,CALML4,EPS8L3,SLC38A3,SLC27A2,RAB25,AMN,NOL3,RBP4,TF,LGALS3,TFF2,LGALS4,TFF3,LGALS9,RNASE4,SERPINB1,CD68
Coexpression Atlas	gudmap_developingKidney_e15.5_S-shaped body_1000	DevelopingKidney_e15.5_S-shaped body_emap-27855_top-relative-expression-ranked_1000	Gudmap Mouse MOE430.2	7.37e-20	3e-16	3.79e-18	3.37e-17	76	811	RGMB,HLA-DMB,ENPP2,PLCXD1,CARD10,MGLL,HNF4A,TUBA4A,MEP1A,PLEKHH1,ADORA1,SERPINA1,TFCP2L1,MFNG,CLIC5,HPN,PCDH19,PLAG1,SERPINF2,ALDOB,RBM47,VEGFA,VIL1,SGPP2,CXCL14,CLDN7,SLC1A1,MISP,BRI3BP,UNC5CL,TMEM37,IGSF1,C1QTNF12,ATP1B1,FXYD2,PRDM16,IL2RG,PRSS8,PAQR5,KIF12,GCHFR,GCNT1,ANKS4B,STEAP2,ELOVL2,GGT1,ITPR3,APOM,PTPN3,TINAG,CLRN3,SLC39A5,SLC27A2,NPNT,CA12,WSCD1,NDNF,DPP4,AMN,LAMC2,MAP7,PAPSS2,TFRC,SFX…
Coexpression	M45672	HE_LIM_SUN_FETAL_LUNG_C0_LATE_MESOTHELIAL_CELL	C8: Cell Type Signature	8.48e-20	8.16e-16	2.47e-17	2.41e-16	63	704	TMEM176A,MGLL,NDRG1,CLIC5,MTUS1,CGN,PLAUR,SMPD3,RBM47,VIPR2,FLNB,ANG,TMEM176B,KIAA1522,PRR15L,CDCP1,BHLHE40,MST1,LSR,MISP,RHPN2,TMEM37,IL6R,CXADR,NAAA,MYO1D,ERAP1,CYP27A1,GBP3,SPOCK2,IRF7,GCHFR,PTAFR,CFB,ITPR3,NELL2,LINC02381,KLF5,SEMA3B,NQO1,COBL,CALML4,MVP,CA2,NPNT,DPP4,P4HA2,ARRDC4,SLC26A2,LAMC2,CXCL16,RSPO3,SLC22A18,PLLP,RNASE4,EFNA1,SLC16A3,LMO7,SCARB1,SERPINB1,PRR15,TM4SF1,RSPO1
Coexpression	M45708	HE_LIM_SUN_FETAL_LUNG_C1_PROXIMAL_SECRETORY_2_CELL	C8: Cell Type Signature	1.1e-19	1.06e-15	3.1e-17	3.03e-16	41	301	TMEM144,ABO,TMEM176A,B3GALT5,FAM3D,LRG1,POF1B,SERPINA1,SCNN1A,DEGS2,MUC20,VIPR1,ANG,TMEM176B,TMPRSS4,CP,BHLHE40,ARHGAP27,MCTP2,MUC4,ATP2A3,SOD3,PAG1,IQGAP2,TNFSF10,CEACAM6,GBP3,ISG20,ITGB4,CAPN8,NPNT,AMN,GALNT12,SLC44A4,PAPSS2,TF,LGALS9,PLLP,ENTPD5,TSPAN8,TM4SF1
Coexpression	M41659	TRAVAGLINI_LUNG_ALVEOLAR_EPITHELIAL_TYPE_1_CELL	C8: Cell Type Signature	2.51e-19	2.42e-15	6.9e-17	6.73e-16	46	391	TSPAN15,MGLL,TUBA4A,PLAC8,CKB,MGAT3,CLIC5,SEMA6D,HPCAL1,CGN,OSGIN1,VEGFA,CLDN7,SLC1A1,ZFP36,ATF3,PRSS8,CEACAM6,IRF1,SPOCK2,ISG20,GGT1,SULT1A1,FZD5,SEMA3B,ATP11A,TACC1,NDNF,P4HA2,DPYSL2,TPPP,LAMC2,CXCL16,B3GNT7,PAPSS2,LGALS3,ABLIM1,PLLP,EFNA1,INF2,LMO7,SUSD2,TMPRSS2,CD151,TM4SF1,EPCAM
Coexpression Atlas	gudmap_RNAseq_e11.5_Ureteric_tips_2500	gudmap_RNAseq_e11.5_Ureteric_tips_2500	Gudmap RNAseq	2.54e-19	1.03e-15	1.29e-17	1.15e-16	121	1786	TSPAN15,EPHX2,HDHD3,CNKSR1,ERBB3,HINT1,HK2,HLA-DMB,RIMKLA,MGAT4A,SERPINF1,CARD10,MGLL,LDOC1,PLAC8,MYORG,CKB,TFCP2L1,HOXC6,CAMK2N1,HOXD1,HOOK1,SCD,HPN,PCDH19,PRR13,CGN,RBM47,LRRC75A,BAIAP2L2,FOXD2,ANPEP,CORO2A,KIAA1522,FA2H,CAMSAP3,SGPP2,PRR15L,CXCL14,CLDN3,CLDN7,CDCP1,ZFP36,SEMA4G,HAPLN1,LSR,IGF2,C1orf226,RHPN2,TMEM37,NT5C2,RASEF,ARHGAP27,FUT2,OCLN,C1QTNF12,PRDM16,IL2RG,SOD3,TJP3,ANO9,MASP1,PECR,…
Coexpression Atlas	PCBC_ctl_SmallAirwayEpithel_1000	Progenitor-Cell-Biology-Consortium_reference_SmallAirwayEpithel_top-relative-expression-ranked_1000	PCBC	3.02e-19	1.23e-15	1.52e-17	1.35e-16	84	987	CNKSR1,ATP8B1,CYP2S1,KLF4,F3,SQOR,POF1B,S100A6,SERPINA1,TFCP2L1,NDRG1,SH3RF2,SCNN1A,CCL20,FXYD3,ALOX15B,OSGIN1,VEGFA,SEMA4B,FLNB,EPB41L4B,CORO2A,ERO1A,SGPP2,HKDC1,TMPRSS4,CXCL14,SLC39A4,TMC4,CLDN7,CDCP1,BHLHE40,ZFP36,TXNIP,LSR,MISP,TRIB3,TMEM45B,C15orf48,CCDC68,RASEF,RNF39,SDCBP2,MCTP2,IL2RG,ABCC3,ANO9,PRSS3,PRSS8,GALNT3,TNFSF10,FAM83E,CEACAM6,PTAFR,ITGB2,ITGB4,RNF43,NAGS,PTPN3,TMEM92,KLF5,MARVEL…
Coexpression	M42502	FOROUTAN_TGFB_EMT_DN	C2:CGP: Chemical and Genetic Perturbations	3.03e-19	2.91e-15	8.09e-17	7.89e-16	26	108	ERBB3,ATP8B1,SQOR,HOOK1,MTUS1,SCNN1A,MMP7,RBM47,PLS1,EPB41L4B,FA2H,CP,LSR,MUC1,CXADR,CEACAM6,CFB,SULT1A1,SLC27A2,RAB25,MAP7,ABLIM1,C1orf115,SERPINB1,ELF3,EPCAM
GO: Biological Process	GO:0006629	lipid metabolic process		3.53e-19	2.38e-15	2.38e-15	2.23e-14	113	1599	HEXB,EPHX2,CEACAM5,ABO,ENPP1,ENPP2,PLCXD1,CEACAM7,B3GALT5,MGLL,GOLM1,ATP8B1,CYP2S1,ST6GALNAC6,F2,HNF4A,FAM3D,TTR,FABP1,ADORA1,CLCN2,PIK3CB,AFP,SCD,AGT,NPC1L1,OSBPL9,UGT8,PLCB4,SMPD3,DEGS2,ALOX15B,HSD17B7,ANG,MOGAT2,PRXL2B,FA2H,DHRS11,AOAH,AGPAT2,SGPP2,ISX,APOA1,APOA2,APOA4,APOB,FADS6,PPARA,SIRT6,CPT1A,LPIN3,LSR,IGF2,FAR2,TRIB3,PLPP3,CIDEC,MTTP,PRKCD,ATP1A1,FUT2,MOGAT3,IPMK,DGAT1,ACSL5,SORL1,CIDEB…
Coexpression Atlas	gudmap_kidney_e15.5_Podocyte_MafB_1000	kidney_e15.5_Podocyte_MafB_top-relative-expression-ranked_1000	Gudmap Mouse MOE430.2	3.76e-19	1.53e-15	1.87e-17	1.66e-16	75	815	HLA-DMB,ENPP2,MGAT4A,TMEM176A,ATP8B1,HNF4A,TUBA4A,PLAC8,MEP1A,S100A6,TFCP2L1,CLIC5,HOOK1,AFP,UGT8,ALDOB,RBM47,PLOD2,PLS1,VIL1,SELENOP,ANPEP,SGPP2,CLDN7,SLC3A1,FRZB,TMEM37,RASEF,OCLN,C1QTNF12,ATP1B1,FXYD2,MCTP2,CIDEB,PECR,GALNT3,IQGAP2,MYO6,KIF12,GCNT1,ANKS4B,STEAP2,ELOVL2,HEPH,CFB,GGT1,PTPN3,NELL2,TINAG,CHPT1,PTPRJ,CLRN3,CALML4,CA2,SLC27A2,NPNT,NDNF,DPP4,ARRDC4,LAMC2,GLB1L2,MAP7,PAPSS2,TFRC,ACE2,…
Coexpression Atlas	gudmap_developingKidney_e11.5_ureteric bud_500	DevelopingKidney_e11.5_ureteric bud_emap-3844_top-relative-expression-ranked_500	Gudmap Mouse MOE430.2	4.09e-19	1.66e-15	2e-17	1.78e-16	51	401	CNKSR1,ERBB3,GCNT3,HLA-DMB,PLCXD1,TLCD4,WIPF3,LDOC1,PLAC8,TFCP2L1,HOXD1,HPN,PCDH19,CGN,AK4,SGPP2,CXCL14,TMC4,CLDN3,CLDN7,CDCP1,ZFP36,HAPLN1,OCLN,PRDM16,TJP3,ANO9,PRSS8,KIF12,RNF43,GGT1,PTPN3,MARVELD3,SLC27A2,NPNT,CA12,WSCD1,DPP4,RAB25,RAB17,LAMC2,GLB1L2,MAP7,LLGL2,RASSF6,CLMN,PAK1,TMPRSS2,EPCAM,PADI2,CDH16
Coexpression	M45713	HE_LIM_SUN_FETAL_LUNG_C1_SMG_CELL	C8: Cell Type Signature	6.51e-19	6.26e-15	1.69e-16	1.65e-15	65	776	ABO,PFKP,F3,SQOR,FAM3D,ABHD17C,AK4,FBXO32,MMP7,CCL20,MUC20,ANG,ANPEP,SGPP2,KIF16B,MYO18A,CP,CDCP1,BHLHE40,UNC5CL,FRZB,ARHGAP27,FUT2,ATP2A3,SPIRE2,IQGAP2,TNFSF10,RAPGEF5,GATM,FAM83E,CEACAM6,ISG20,STEAP2,RETSAT,ITGB4,CFB,NQO1,LPGAT1,COBL,NPNT,CPEB2,KIF13B,RCAN1,TCN1,NOL3,ARRDC4,GALNT12,SLC44A4,PTPN18,SYT7,TF,LGALS9,CNNM4,PLLP,SLC35A3,C1orf115,RASSF6,CLMN,PCSK6,LRRC1,TSPAN8,RORA,PRR15,TM4SF1,PADI2
Coexpression	M39159	GAO_LARGE_INTESTINE_24W_C10_ENTEROCYTE	C8: Cell Type Signature	6.98e-19	6.71e-15	1.77e-16	1.72e-15	20	56	CNKSR1,AOC1,CEACAM7,PLS1,MUC20,ANPEP,MOGAT2,TMEM45B,SLC15A1,DGAT1,PRSS3,MYO1A,CYP3A5,NOXA1,CDHR5,NR1I2,EPS8L3,DPEP1,MLXIPL,EFNA2
Coexpression Atlas	gudmap_developingKidney_e15.5_S-shaped body_500	DevelopingKidney_e15.5_S-shaped body_emap-27855_top-relative-expression-ranked_500	Gudmap Mouse MOE430.2	7.02e-19	2.86e-15	3.4e-17	3.03e-16	51	406	HLA-DMB,ENPP2,PLCXD1,MGLL,HNF4A,MEP1A,PLEKHH1,ADORA1,SERPINA1,TFCP2L1,CLIC5,HPN,PCDH19,ALDOB,RBM47,VEGFA,VIL1,SGPP2,CXCL14,CLDN7,SLC1A1,TMEM37,IGSF1,C1QTNF12,ATP1B1,FXYD2,PRDM16,IL2RG,PRSS8,KIF12,GCNT1,ELOVL2,GGT1,APOM,TINAG,CLRN3,SLC39A5,SLC27A2,WSCD1,NDNF,DPP4,AMN,PAPSS2,SFXN1,ACE2,RASSF6,TSPAN8,PRR15,TM4SF1,CDH4,CDH16
Coexpression Atlas	gudmap_developingLowerUrinaryTract_e13.5_bladder epithelial cells_500	DevelopingLowerUrinaryTract_e13.5_bladder epithelial cells_emap-30875_top-relative-expression-ranked_500	Gudmap Mouse MOE430.2	7.31e-19	2.98e-15	3.5e-17	3.11e-16	50	391	ERBB3,ENPP1,MGAT4A,ATP8B1,LDOC1,TTR,POF1B,PLEKHH1,S100A6,HOXD1,UGT8,AK4,FXYD3,RBM47,PLS1,FA2H,CLDN3,CLDN7,VSIG10,CDCP1,ZFP36,HAPLN1,TMEM45B,CCDC68,RASEF,ATF3,OCLN,CXADR,SORL1,TJP3,ABCC3,ANO9,PRSS8,ABHD3,PAQR5,KLF5,MARVELD3,CA2,CPEB2,RAB25,TRIM2,LAMC2,GLB1L2,LGALS3,RASSF6,LRRC1,TSPAN8,TMPRSS2,EPCAM,CDH17
Coexpression Atlas	gudmap_RNAseq_e15.5_CollectIng Duct_2500_K2	gudmap_RNAseq_e15.5_CollectIng Duct_2500_K2	Gudmap RNAseq	1.05e-18	4.29e-15	4.98e-17	4.43e-16	63	609	CNKSR1,ERBB3,ATP8B1,SQOR,TUBA4A,PLEKHH1,S100A6,HOXD1,HOOK1,HPCAL1,PRELID2,SCD,PRR13,CGN,PLAUR,FXYD3,RBM47,PLS1,OSGIN1,ANG,KIAA1522,ANXA4,CAMSAP3,PRR15L,TMC4,CLDN7,CDCP1,BHLHE40,ZFP36,LSR,RHPN2,ATP1A1,OCLN,ATP1B1,CXADR,ACSL5,TJP3,ANO9,PRSS8,GALNT3,SRI,ABHD3,SPOCK2,RNF43,GGT1,ITPR3,PTPN3,KLF5,SEMA3B,MARVELD3,CA2,RAB25,LAMC2,MAP7,TFRC,SLC22A18,LLGL2,RASSF6,TSPAN8,TMPRSS2,ELF3,CD151,EPCAM
Coexpression Atlas	gudmap_kidney_e15.5_Podocyte_MafB_k1_500	kidney_e15.5_Podocyte_MafB_k-means-cluster#1_top-relative-expression-ranked_500	Gudmap Mouse MOE430.2	1.17e-18	4.76e-15	5.46e-17	4.86e-16	33	166	ENPP2,MEP1A,TFCP2L1,HOOK1,UGT8,ALDOB,RBM47,PLS1,ANPEP,SGPP2,TMEM37,OCLN,ATP1B1,FXYD2,GALNT3,GCNT1,ANKS4B,STEAP2,GGT1,PTPN3,TINAG,CHPT1,CLRN3,CALML4,SLC27A2,GLB1L2,MAP7,PAPSS2,ACE2,LACTB2,TMPRSS2,EPCAM,CDH16
Coexpression Atlas	gudmap_RNAseq_e15.5_CollectIng Duct_2500	gudmap_RNAseq_e15.5_CollectIng Duct_2500	Gudmap RNAseq	1.18e-18	4.81e-15	5.46e-17	4.86e-16	119	1774	TSPAN15,CNKSR1,ERBB3,SYN3,HLA-DMB,CARD10,MGLL,ATP8B1,LDOC1,SQOR,TUBA4A,PLAC8,MYORG,PLEKHH1,S100A6,ADORA1,TFCP2L1,MFNG,HOXC6,CAMK2N1,HOXD1,HOOK1,HPCAL1,PRELID2,SCD,HPN,PRR13,CGN,PLAUR,FXYD3,RBM47,PLS1,OSGIN1,ANG,ANPEP,KIAA1522,ANXA4,CAMSAP3,SGPP2,PRR15L,CXCL14,TMC4,CLDN3,CLDN7,CDCP1,BHLHE40,ZFP36,LSR,AATK,C1orf226,DOK4,RHPN2,TMEM37,ARHGAP27,ATP1A1,OCLN,ATP1B1,MUC1,PRDM16,IL2RG,CXADR,ACSL5,TJP3,ANO…
Coexpression Atlas	gudmap_RNAseq_e11.5_Ureteric_stalks_2500	gudmap_RNAseq_e11.5_Ureteric_stalks_2500	Gudmap RNAseq	1.5e-18	6.12e-15	6.87e-17	6.11e-16	124	1897	TSPAN15,HDHD3,CNKSR1,ERBB3,HK2,SYN3,HLA-DMA,HLA-DMB,RIMKLA,WIPF3,TMEM176A,CARD10,MGLL,ATP8B1,LDOC1,F3,TUBA4A,PLAC8,MYORG,CKB,PLEKHH1,TFCP2L1,HOXC6,CAMK2N1,HOXD1,HOOK1,HPCAL1,PRELID2,SCD,HPN,PCDH19,PRR13,CGN,AK4,RBM47,PLS1,FOXD2,USP53,ANPEP,KIAA1522,CAMSAP3,SGPP2,KIF16B,PRR15L,CXCL14,SLC39A4,TMC4,CLDN3,CLDN7,CDCP1,BHLHE40,ZFP36,HAPLN1,LSR,IGF2,C1orf226,RHPN2,ASL,NT5C2,RASEF,PRKCSH,CTNNA1,ATP1A1,OC…
Coexpression Atlas	gudmap_RNAseq_e11.5_Ureteric_tips_2500_K4	gudmap_RNAseq_e11.5_Ureteric_tips_2500_K4	Gudmap RNAseq	1.86e-18	7.59e-15	8.43e-17	7.49e-16	52	431	CNKSR1,ERBB3,MGAT4A,HOXD1,SCD,PRR13,CGN,RBM47,CORO2A,KIAA1522,FA2H,CAMSAP3,PRR15L,CLDN3,CLDN7,CDCP1,ZFP36,SEMA4G,LSR,RHPN2,RASEF,ARHGAP27,FUT2,OCLN,TJP3,ANO9,PRSS8,GALNT3,TNFSF9,ABHD3,SPOCK2,RNF43,ITIH2,GGT1,ITPR3,PTPN3,KLF5,MARVELD3,SLC27A2,NPNT,RAB25,LAMC2,MAP7,SLC22A18,EFNA1,LLGL2,RASSF6,TMPRSS2,ELF3,CDA,EPCAM,GPA33
Coexpression Atlas	gudmap_kidney_adult_RenalCortexMixed_Std_k1_1000	kidney_adult_RenalCortexMixed_Std_k-means-cluster#1_top-relative-expression-ranked_1000	Gudmap Mouse MOE430.2	2.38e-18	9.68e-15	1.06e-16	9.46e-16	55	482	HEXB,EPHX2,HGD,TLCD4,TMEM176A,ME1,SQOR,TTR,MEP1A,SERPINA1,HOOK1,UGT8,AK4,DEGS2,SLC51A,PLS1,VIL1,ANPEP,PRXL2B,APOA2,SLC1A1,SLC3A1,SLC51B,LRRC19,CCDC68,CIDEB,PBLD,ACSS2,ANKS4B,STEAP2,ELOVL2,APOM,GGH,PTPN3,TINAG,SULT1B1,CLRN3,NQO1,ATP11A,CALML4,TMT1B,SLC19A3,GLB1L2,SLC44A4,PAPSS2,SFXN1,ACE2,SLC22A18,CRYL1,SLC35A3,SLC16A4,SUSD2,CDA,HSD17B11,EPCAM
Coexpression Atlas	gudmap_developingLowerUrinaryTract_adult_ureter_1000_k2	DevelopingLowerUrinaryTract_adult_ureter_emap-29479_k-means-cluster#2_top-relative-expression-ranked_1000	Gudmap Mouse MOE430.2	2.69e-18	1.09e-14	1.19e-16	1.06e-15	42	285	CHDH,FAM3D,TUBA4A,FABP1,SERPINA1,TFCP2L1,MGAT3,MMP7,OSGIN1,EPB41L4B,CORO2A,PAQR8,PRR15L,TMPRSS4,CP,CLDN3,VSIG10,BHLHE40,MST1,GDA,RHPN2,SLCO2A1,ATP1B1,RNF39,TJP3,GALNT3,TNFSF10,CYP3A5,CEACAM1,PTPN3,COBL,MARVELD3,MVP,TRIM2,RAB17,CXCL16,SLC44A4,PTPN18,P2RX4,LMO7,TSPAN8,SERPINB1
Coexpression Atlas	gudmap_developingKidney_e15.5_S-shaped body_500_k4	DevelopingKidney_e15.5_S-shaped body_emap-27855_k-means-cluster#4_top-relative-expression-ranked_500	Gudmap Mouse MOE430.2	2.75e-18	1.12e-14	1.21e-16	1.07e-15	25	89	ENPP2,HNF4A,MEP1A,PLEKHH1,SERPINA1,HPN,ALDOB,RBM47,VIL1,SLC1A1,FXYD2,PRSS8,KIF12,GCNT1,ELOVL2,GGT1,APOM,TINAG,CLRN3,SLC39A5,SLC27A2,DPP4,AMN,ACE2,PRR15
Coexpression Atlas	facebase_RNAseq_e9.5_OlfPlac_2500_K2	facebase_RNAseq_e9.5_OlfPlac_2500_K2	Gudmap RNAseq	2.79e-18	1.14e-14	1.21e-16	1.08e-15	45	328	CNKSR1,ERBB3,ATP8B1,LDOC1,POF1B,PLEKHH1,CGN,PLAUR,RBM47,PLS1,CAMSAP3,CLDN3,CLDN7,CDCP1,LSR,CCDC68,RASEF,ARHGAP27,OCLN,MCTP2,SORL1,TJP3,ANO9,PRSS8,GALNT3,RNF43,PTPN3,KLF5,MARVELD3,SLC27A2,NPNT,CPEB2,EGLN3,RAB25,GPX2,LAMC2,MAP7,SLC22A18,ELMO3,LLGL2,KIAA1217,TMPRSS2,ELF3,CD151,EPCAM
Coexpression Atlas	Arv_SC-HD_1000_K3	AravindRamakr_StemCell-HD_top-relative-expression-ranked_1000_k-means-cluster#3	PCBC	3.21e-18	1.31e-14	1.38e-16	1.22e-15	34	183	CDX2,AOC1,CEACAM7,FABP1,MEP1A,SERPINA1,ALDOB,ALPI,PRR15L,APOA1,APOA4,APOB,MUC13,MTTP,MYO1A,CYP3A5,CDHR2,CDHR5,CLRN3,EPS8L3,CREB3L3,DMBT1,PHGR1,SLC39A5,TRIM15,SLC26A3,TRIM31,RNF183,USH1C,LGALS4,TFF3,TSPAN8,GPA33,CDH17
Coexpression	M17299	CHARAFE_BREAST_CANCER_LUMINAL_VS_MESENCHYMAL_UP	C2:CGP: Chemical and Genetic Perturbations	3.4e-18	3.27e-14	8.38e-16	8.17e-15	48	454	ERBB3,MGAT4A,CAMK2N1,HOOK1,CGN,DEGS2,FXYD3,RBM47,VIPR1,SELENOP,KIAA1522,FA2H,CAMSAP3,PRR15L,TMC4,CLDN3,CLDN7,LSR,TRIB3,TMEM45B,RASEF,OCLN,MUC1,SORL1,TJP3,PRSS8,MYO1D,MYO6,CEACAM6,CAPN8,MARVELD3,CA12,RAB25,RAB17,NOL3,ARRDC4,MAP7,SYT7,TFF3,CNNM4,ELMO3,LLGL2,TMPRSS2,ELF3,PRR15,EPCAM,PADI2,PCDH1
Coexpression Atlas	gudmap_developingKidney_e11.5_ureteric bud_1000	DevelopingKidney_e11.5_ureteric bud_emap-3844_top-relative-expression-ranked_1000	Gudmap Mouse MOE430.2	4.6e-18	1.87e-14	1.95e-16	1.73e-15	73	813	CNKSR1,ERBB3,HK2,GCNT3,HLA-DMB,PLCXD1,TLCD4,WIPF3,CARD10,MGLL,LDOC1,F3,PLAC8,TFCP2L1,HOXD1,HPN,PCDH19,CGN,UGT8,AK4,PLOD2,HSD17B7,KIAA1522,CAMSAP3,SGPP2,PRR15L,HKDC1,CXCL14,TMC4,CLDN3,CLDN7,CDCP1,ZFP36,HAPLN1,LSR,BRI3BP,RHPN2,ATF3,OCLN,MUC1,PRDM16,TJP3,ANO9,PRSS8,TNFSF9,ABHD3,KIF12,GCHFR,RNF43,GGT1,PTPN3,SEMA3B,MARVELD3,SLC27A2,NPNT,CA12,WSCD1,DPP4,RAB25,RAB17,GALNT12,LAMC2,GLB1L2,MAP7,ELMO3,LLGL2…
Coexpression	M4960	SMID_BREAST_CANCER_BASAL_DN	C2:CGP: Chemical and Genetic Perturbations	5.01e-18	4.81e-14	1.2e-15	1.17e-14	60	699	EPHX2,PCSK5,HGD,ERBB3,CEACAM5,ENPP1,CAMK2N1,MTUS1,AFP,SCD,HPN,SCNN1A,FGB,SMPD3,RBM47,ALOX15B,VIPR1,SELENOP,ANG,KIF16B,CXCL14,SLC1A1,ABCC6,MISP,BRINP2,MUC1,ATP2A3,SORL1,TJP3,ABCC3,CYP2B6,IQGAP2,MYO6,TNFSF10,SRI,FAM83E,CEACAM6,FAXDC2,PBLD,ELOVL2,CFB,GGT1,NELL2,SEMA3B,NQO1,SLC27A2,CA12,KIF13B,SLC26A3,RAB17,TCN1,RBP4,SLC44A4,TFF3,SLC22A18,RNASE4,EVA1B,PCSK6,TSPAN8,SERPINA5
Coexpression Atlas	gudmap_RNAseq_e11.5_Ureteric_stalks_2500_K2	gudmap_RNAseq_e11.5_Ureteric_stalks_2500_K2	Gudmap RNAseq	5.08e-18	2.07e-14	2.13e-16	1.9e-15	52	441	TSPAN15,CNKSR1,ERBB3,MGLL,ATP8B1,PLAC8,HOXC6,CAMK2N1,HOXD1,PRR13,CGN,RBM47,PLS1,CAMSAP3,PRR15L,SLC39A4,TMC4,CLDN7,CDCP1,BHLHE40,ZFP36,LSR,OCLN,ATP1B1,TJP3,ANO9,PRSS8,GALNT3,RAPGEF5,ABHD3,SPOCK2,GCHFR,GDNF,RNF43,GGT1,ITPR3,KLF5,MARVELD3,RAB25,LAMC2,GLB1L2,MAP7,SLC22A18,ELMO3,LLGL2,RASSF6,TMPRSS2,ELF3,CD151,EPCAM,PCDH1,GPA33
GO: Biological Process	GO:0015711	organic anion transport		6.52e-18	4.39e-14	2.2e-14	2.06e-13	56	506	CEACAM5,SLCO2B1,CEACAM7,ATP8B1,FABP1,ADORA1,AGT,HRH2,ABCG2,ABCC2,SLC51A,GLTPD2,SLC39A4,XK,PPARA,CPT1A,SLC1A1,ABCC6,SLC3A1,SLC51B,SLC6A8,SLC15A1,SLC17A9,SLCO2A1,MTTP,PRKCD,ACSL5,ABCC3,SLC36A1,MYO6,CEACAM6,SLC46A1,TNFRSF11A,SLC36A2,CEACAM1,SLC39A5,SLC38A3,SLC27A2,HNF1A,DPYSL2,SLC26A3,SLC26A2,SLC19A3,SLC17A4,SLC44A4,SFXN1,SLC25A22,ACE2,SLC35A3,LLGL2,P2RX4,SLC16A4,SLC16A3,PAK1,SLC39A14,SLC6A14
Coexpression	M2396	SERVITJA_ISLET_HNF1A_TARGETS_DN	C2:CGP: Chemical and Genetic Perturbations	6.61e-18	6.36e-14	1.55e-15	1.51e-14	25	110	PFKP,FOXA3,HNF4A,TTR,MELTF,CLIC5,FXYD3,VIL1,RNF186,ANXA4,TMPRSS4,MUC4,CDHR2,GATM,KIF12,ANKS4B,ELOVL2,MTMR11,DPP4,SGK2,ACE2,MLXIPL,RNASE4,TM4SF4,TMPRSS2
Coexpression Atlas	PCBC_ratio_EB blastocyst_vs_EB UCB CD34+Z_cfr-2X-p05	EB blastocyst_vs_EB UCB CD34+Z-Confounder_removed-fold2.0_adjp0.05	PCBC_AltAnalyze	6.98e-18	2.84e-14	2.89e-16	2.57e-15	22	67	CDX2,F2,HAVCR1,HPN,AGT,FGB,SELENOP,VTN,APOA1,APOA2,APOB,CLDN3,MST1,DOK4,CYP27A1,APOM,GNRH2,LGALS3,LLGL2,CCDC183,CDH17,STOM
Coexpression Atlas	gudmap_kidney single cell_adult_RenalCortexMixed_Scamp_200	kidney single cell_adult_RenalCortexMixed_StemCellamp_top-relative-expression-ranked_200	Gudmap Mouse MOE430.2	7.03e-18	2.86e-14	2.89e-16	2.57e-15	32	164	EPHX2,HGD,ME1,MEP1A,SERPINA1,SLC51A,ALDOB,SELENOP,RNF186,SLC3A1,ATP1B1,CIDEB,PECR,PRSS8,GATM,CDHR5,ACSS2,RETSAT,GGT1,APOM,TINAG,CHPT1,CALML4,CA2,SLC27A2,DPEP1,TMT1B,CRYL1,LACTB2,TSPAN8,CDA,CDH16
Coexpression	M6744	COLDREN_GEFITINIB_RESISTANCE_DN	C2:CGP: Chemical and Genetic Perturbations	1.04e-17	1e-13	2.33e-15	2.27e-14	34	229	CNKSR1,ERBB3,LRG1,CGN,FXYD3,RBM47,HSD17B7,KIAA1522,PRR15L,TMPRSS4,TMC4,CLDN7,SLC1A1,LSR,TMEM45B,PRKCD,RASEF,TJP3,PRSS8,GALNT3,MYO1D,MYO6,CAPN8,MARVELD3,TTC22,NPNT,RAB25,ADAP1,LAMC2,LGALS9,SLC35A3,ELMO3,LMO7,ELF3
Coexpression	MM965	HOLLERN_EMT_BREAST_TUMOR_DN	M2:CGP: Chemical and Genetic Perturbations	1.04e-17	1e-13	2.33e-15	2.27e-14	27	135	ERBB3,CEACAM5,CHDH,CEACAM7,POF1B,PLEKHH1,FXYD3,EPB41L4B,TMC4,CLDN3,CLDN7,CDCP1,LSR,RHPN2,OCLN,CXADR,TJP3,PRSS8,CEACAM6,RNF43,CEACAM1,RAB25,MAP7,ELMO3,LLGL2,TMPRSS2,EPCAM
Coexpression Atlas	gudmap_developingKidney_e14.5 whole kidney - wildtype_500_k2	DevelopingKidney_e14.5 whole kidney - wildtype_emap-6674_k-means-cluster#2_top-relative-expression-ranked_500	Gudmap Mouse MOE430.2	1.08e-17	4.4e-14	4.4e-16	3.91e-15	26	103	HLA-DMB,HNF4A,TUBA4A,MEP1A,AFP,HPN,SERPINF2,ALDOB,ANG,PRR15L,TMEM45B,ATP1A1,FXYD2,SOD3,CIDEB,PAQR5,ANKS4B,GGT1,TINAG,CALML4,SLC39A5,CA2,AMN,TCN2,ACE2,SUSD2
Coexpression Atlas	gudmap_kidney_adult_CortVasc_Tie2_500	kidney_adult_CortVasc_Tie2_top-relative-expression-ranked_500	Gudmap Mouse MOE430.2	1.13e-17	4.61e-14	4.56e-16	4.06e-15	50	417	HGD,HLA-DMA,MGLL,ACVRL1,SQOR,PLAC8,MEP1A,S100A6,SERPINA1,NDRG1,CLIC5,ALDOB,SELENOP,SLC3A1,TXNIP,PLPP3,SLCO2A1,ATP1B1,FXYD2,IL2RG,PECR,MYO6,TNFSF10,ERAP1,RAPGEF5,GATM,IRF7,CDHR5,GCNT1,TMBIM1,CFB,GGT1,CEACAM1,TINAG,CHPT1,CALML4,CA2,SLC27A2,NPNT,DPEP1,TCN2,TMT1B,GPX3,LGALS9,EFNA1,LACTB2,TSPAN8,TM4SF1,CDH16,STOM
Coexpression	M39119	AIZARANI_LIVER_C17_HEPATOCYTES_3	C8: Cell Type Signature	1.28e-17	1.23e-13	2.8e-15	2.73e-14	24	102	SERPINF1,TMEM176A,F2,LRG1,SERPINA1,HPN,FGB,PLG,SERPINF2,VTN,ANG,TMEM176B,CP,APOA1,APOA2,APOB,MST1,IGF2,CYP2B6,CFB,RBP4,TF,ORM1,MLXIPL
Coexpression Atlas	gudmap_developingKidney_e15.5_anlage of loop of Henle_1000	DevelopingKidney_e15.5_anlage of loop of Henle_emap-31283_top-relative-expression-ranked_1000	Gudmap Mouse MOE430.2	1.84e-17	7.48e-14	7.33e-16	6.52e-15	71	795	RGMB,ENPP2,MGAT4A,PFKP,HNF4A,TTR,TUBA4A,MEP1A,PLEKHH1,TFCP2L1,CAMK2N1,CLIC5,PRELID2,AFP,UGT8,PLAG1,ALDOB,RBM47,VEGFA,SGPP2,CLDN3,CLDN7,CDCP1,IGF2,ATP1A1,C1QTNF12,ATP1B1,MUC1,FXYD2,PRDM16,MCTP2,CXADR,SORL1,PRSS8,IQGAP2,PAQR5,KIF12,GCNT1,STEAP2,GDNF,GGT1,PTPN3,TINAG,CHPT1,CLRN3,SLC39A5,SLC27A2,CPEB2,WSCD1,DPP4,TRIM2,RAB17,AMN,CECR2,MAP7,PAPSS2,LGALS3,TFRC,SGK2,USP2,MLXIPL,SLC35A3,TRNT1,RASSF6,KIAA1…
Coexpression	M41698	TRAVAGLINI_LUNG_TREM2_DENDRITIC_CELL	C8: Cell Type Signature	1.88e-17	1.81e-13	4.03e-15	3.92e-14	53	572	HEXB,HLA-DMA,HLA-DMB,SLCO2B1,SERPINF1,TMEM176A,MGLL,PFKP,KLF4,ME1,SQOR,S100A6,SERPINA1,FCGRT,SCD,QPCT,PLAUR,RBM47,TMEM176B,ANPEP,UBD,ANXA4,AGPAT2,IFNGR1,PLPP3,C15orf48,ATF3,CTNNA1,CTSS,ABCC3,CYP27A1,GCHFR,RILP,PTAFR,ITGB2,TMBIM1,TMEM70,MVP,CA2,DPYSL2,TCN2,GPX3,RBP4,NR1H3,CXCL16,LGALS3,TFRC,LGALS9,P2RX4,SLC16A3,GUSB,CD68,CD151
Coexpression	M1432	SANSOM_APC_TARGETS_DN	C2:CGP: Chemical and Genetic Perturbations	1.95e-17	1.88e-13	4.08e-15	3.98e-14	42	364	EPHX2,PCSK5,AOC1,HLA-DMB,CYP2S1,FABP1,MGAT3,CLCN2,CCL5,ABCC2,SLC51A,ALDOB,MOGAT2,CXCL14,PPARA,CIDEC,MTTP,ATP1B1,ATP2A3,DGAT1,MXI1,SOD3,CIDEB,ABCC3,IRF1,CDHR5,ITGB2,GGT1,CHPT1,LPGAT1,DPEP1,SLC11A2,RBP4,NR1H3,PAPSS2,SLC22A18,USP2,CD7,ENTPD5,LY75,PC,ARHGAP45
Coexpression Atlas	gudmap_developingKidney_e15.5_early proxim tubul_1000_k2	DevelopingKidney_e15.5_early proxim tubul_emap-28005_k-means-cluster#2_top-relative-expression-ranked_1000	Gudmap Mouse MOE430.2	2.59e-17	1.05e-13	1.01e-15	8.99e-15	23	79	ERBB3,TFCP2L1,UGT8,AGPAT2,TMC4,CLDN3,CLDN7,CDCP1,ATP1A1,OCLN,ATP1B1,TJP3,PRSS8,GALNT3,GJB1,NPNT,RAB17,GLB1L2,LGALS3,ELMO3,LLGL2,TMPRSS2,CDH16
Coexpression Atlas	gudmap_developingKidney_e15.5_early proxim tubul_500_k3	DevelopingKidney_e15.5_early proxim tubul_emap-28005_k-means-cluster#3_top-relative-expression-ranked_500	Gudmap Mouse MOE430.2	2.59e-17	1.05e-13	1.01e-15	8.99e-15	23	79	F2,TTR,AFP,FGB,ABCC2,BNIP5,MOGAT2,SLC39A4,APOA1,APOA2,APOA4,APOB,TMEM37,ANKS4B,CFB,APOM,DPEP1,GPX3,RBP4,TF,TFF3,SLC22A18,CRYL1
Coexpression Atlas	gudmap_developingKidney_e15.5_Medullary collecting duct_200	DevelopingKidney_e15.5_Medullary collecting duct_emap-28063_top-relative-expression-ranked_200	Gudmap Mouse MOE430.2	2.87e-17	1.17e-13	1.11e-15	9.88e-15	31	160	GCNT3,MGAT4A,ATP8B1,POF1B,PLAC8,TFCP2L1,HOXD1,HPN,UGT8,FXYD3,RBM47,VEGFA,RNF186,SGPP2,TMC4,CLDN3,CLDN7,TMEM45B,RHPN2,OCLN,MUC1,PRDM16,PRSS8,KIF12,RAB17,GLB1L2,LGALS3,TFRC,TSPAN8,TMPRSS2,CDH16
Coexpression Atlas	gudmap_kidney_e15.5_Podocyte_MafB_500	kidney_e15.5_Podocyte_MafB_top-relative-expression-ranked_500	Gudmap Mouse MOE430.2	3.4e-17	1.38e-13	1.31e-15	1.16e-14	49	412	HLA-DMB,ENPP2,PLAC8,MEP1A,TFCP2L1,CLIC5,HOOK1,AFP,UGT8,ALDOB,RBM47,PLS1,ANPEP,SGPP2,CLDN7,TMEM37,RASEF,OCLN,ATP1B1,FXYD2,GALNT3,IQGAP2,MYO6,GCNT1,ANKS4B,STEAP2,GGT1,PTPN3,NELL2,TINAG,CHPT1,PTPRJ,CLRN3,CALML4,SLC27A2,NPNT,NDNF,DPP4,GLB1L2,MAP7,PAPSS2,TFRC,ACE2,LACTB2,TSPAN8,TMPRSS2,TM4SF1,EPCAM,CDH16
Coexpression Atlas	gudmap_kidney single cell_adult_RenalCortexMixed_Scamp_k3_200	kidney single cell_adult_RenalCortexMixed_StemCellamp_k-means-cluster#3_top-relative-expression-ranked_200	Gudmap Mouse MOE430.2	3.72e-17	1.51e-13	1.41e-15	1.26e-14	30	150	EPHX2,HGD,ME1,MEP1A,SERPINA1,SLC51A,ALDOB,SELENOP,RNF186,SLC3A1,ATP1B1,CIDEB,PECR,PRSS8,GATM,CDHR5,ACSS2,RETSAT,GGT1,APOM,TINAG,CALML4,CA2,SLC27A2,DPEP1,TMT1B,LACTB2,TSPAN8,CDA,CDH16
Coexpression	M2324	LEE_BMP2_TARGETS_UP	C2:CGP: Chemical and Genetic Perturbations	4.64e-17	4.46e-13	9.5e-15	9.26e-14	62	777	SLCO2B1,ENPP2,CHDH,TMEM176A,F3,CKB,TMEM132C,SERPINA1,TFCP2L1,FCGRT,QPCT,FBXO32,DEGS2,VTN,TMEM176B,ANPEP,SGPP2,KIF16B,TMPRSS4,CP,SLC39A4,TMC4,CLDN3,CLDN7,CLSTN1,TXNIP,GDA,TMEM45B,ATP1B1,MUC1,PRSS8,NAAA,CYP27A1,NAGA,SPOCK2,GCNT1,ITGB4,SULT1A1,CALML4,CA2,NPNT,CA12,DPP4,RAB25,TCN2,GPX2,LAMA2,GLB1L2,RGS3,RSPO3,CRYL1,RNASE4,EVA1B,P2RX4,SCARB1,TSPAN8,SERPINB1,TMPRSS2,PAM,HSD17B11,EPCAM,STOM
Coexpression Atlas	gudmap_developingLowerUrinaryTract_P1_ureter_1000	DevelopingLowerUrinaryTract_P1_ureter_emap-30363_top-relative-expression-ranked_1000	Gudmap Mouse MOE430.2	5.97e-17	2.43e-13	2.25e-15	2e-14	69	774	RGMB,GCNT3,SLCO2B1,ENPP1,TLCD4,MGAT4A,MGLL,ATP8B1,LDOC1,KLF4,ME1,F3,FAM3D,TTR,POF1B,PLEKHH1,S100A6,CLIC5,AFP,QPCT,PLCB4,FBXO32,DEGS2,FXYD3,ALDOB,RBM47,PLS1,FA2H,ANXA4,CP,CPT1A,TXNIP,GDA,TMEM45B,SLCO2A1,CCDC68,RAB11FIP5,RASEF,ATF3,OCLN,SDCBP2,PRDM16,CTSS,SORL1,ABCC3,PAQR5,ATP10B,GCNT1,TMBIM1,CFB,NQO1,MARVELD3,SLC27A2,CPEB2,DPEP1,DPP4,ARRDC4,RBP4,TPPP,GLB1L2,TF,LGALS3,TNFRSF11B,ACE2,SLC44A1,TSPAN8,…
Coexpression	MM1067	LEE_BMP2_TARGETS_UP	M2:CGP: Chemical and Genetic Perturbations	6.13e-17	5.9e-13	1.23e-14	1.2e-13	63	804	SLCO2B1,ENPP2,CHDH,TMEM176A,F3,CKB,TMEM132C,SERPINA1,TFCP2L1,FCGRT,QPCT,FBXO32,DEGS2,VTN,TMEM176B,ANPEP,SGPP2,KIF16B,TMPRSS4,CP,SLC39A4,TMC4,CLDN3,CLDN7,CLSTN1,TXNIP,GDA,TMEM45B,ATP1B1,MUC1,PRSS8,NAAA,CYP27A1,NAGA,GBP3,SPOCK2,GCNT1,ITGB4,SULT1A1,CALML4,CA2,NPNT,CA12,DPP4,RAB25,TCN2,GPX2,LAMA2,GLB1L2,RGS3,RSPO3,CRYL1,RNASE4,EVA1B,P2RX4,SCARB1,TSPAN8,SERPINB1,TMPRSS2,PAM,HSD17B11,EPCAM,STOM
GO: Cellular Component	GO:0098590	plasma membrane region		6.72e-17	4.2e-14	8.4e-15	5.89e-14	106	1565	ERBB3,CEACAM5,ACHE,SLCO2B1,ENPP1,CEACAM7,ATP8B1,ABHD17C,ADORA1,HAVCR1,CLIC5,AP2A2,MUC17,PIK3CB,HPN,NPC1L1,SCNN1A,ABCG2,ABCC2,SLC51A,MUC20,SEMA4B,ANPEP,ANXA4,DUOX2,SLC39A4,CLDN3,CLDN7,MUC13,CLSTN1,SLC1A1,ABCC6,SLC3A1,SLC51B,SLC6A8,SLC9A3,SHROOM1,SLC15A1,PLPP3,SLCO2A1,SLC22A5,MTTP,CTNNA1,MAPK3,ATP1A1,OCLN,ATP1B1,MUC1,FXYD2,MUC4,IL6R,CXADR,TJP3,ABCC3,SPIRE2,SLC36A1,MYO1A,MYO1D,MYO6,CDHR2,CEACAM6,CDH…
Coexpression	MM935	SERVITJA_ISLET_HNF1A_TARGETS_DN	M2:CGP: Chemical and Genetic Perturbations	7.51e-17	7.23e-13	1.48e-14	1.44e-13	25	121	PFKP,FOXA3,HNF4A,TTR,MELTF,CLIC5,FXYD3,VIL1,RNF186,ANXA4,TMPRSS4,MUC4,CDHR2,GATM,KIF12,ANKS4B,ELOVL2,MTMR11,DPP4,SGK2,ACE2,MLXIPL,RNASE4,TM4SF4,TMPRSS2
Coexpression Atlas	gudmap_developingLowerUrinaryTract_adult_ureter_500	DevelopingLowerUrinaryTract_adult_ureter_emap-29479_top-relative-expression-ranked_500	Gudmap Mouse MOE430.2	8.04e-17	3.27e-13	3e-15	2.67e-14	46	373	TLCD4,MGAT4A,ATP8B1,FAM3D,TTR,POF1B,PLEKHH1,S100A6,TFCP2L1,CLIC5,FBXO32,MMP7,FXYD3,ANXA4,PRR15L,TMPRSS4,CP,TMC4,CLDN3,CDCP1,GDA,TMEM45B,RHPN2,SLCO2A1,OCLN,RNF39,TJP3,ABCC3,CYP2B6,GALNT3,PAQR5,ATP10B,CEACAM1,PTPN3,MARVELD3,MVP,RAB25,TRIM2,RAB17,SLC44A4,LGALS3,RASSF6,TSPAN8,SERPINB1,TMPRSS2,TM4SF1
Coexpression	M7363	ELVIDGE_HYPOXIA_UP	C2:CGP: Chemical and Genetic Perturbations	8.21e-17	7.9e-13	1.58e-14	1.54e-13	29	172	HK2,PFKP,PLAC8,S100A6,NDRG1,AK4,PLAUR,VEGFA,FLNB,ANG,ERO1A,BHLHE40,TXNIP,ATF3,MXI1,SORL1,ISG20,P4HA2,EGLN3,DPYSL2,STBD1,SRD5A3,NOL3,RNASE4,P4HA1,RASA4,SCARB1,PAM,ELF3
Coexpression Atlas	gudmap_RNAseq_e15.5_Podocytes_2500	gudmap_RNAseq_e15.5_Podocytes_2500	Gudmap RNAseq	1.2e-16	4.87e-13	4.43e-15	3.93e-14	118	1860	HDHD3,ENPP2,WIPF3,TMEM176A,CARD10,MGLL,ACVRL1,TTR,PLAC8,MYORG,CKB,ADORA1,SERPINA1,TFCP2L1,MFNG,HOXC6,CAMK2N1,CLIC5,HPCAL1,FCGRT,AFP,HPN,CCL5,PLAUR,BAIAP2L2,VEGFA,FOXD2,SELENOP,TMEM176B,ANPEP,FA2H,CP,CLDN3,CLDN7,PPARA,CPT1A,ZFP36,COL23A1,IFNGR1,TXNIP,LSR,IGF2,DOK4,PLPP3,CADPS,SLCO2A1,TMEM37,RASEF,PRKCSH,ARHGAP27,FUT2,OCLN,C1QTNF12,FXYD2,MCTP2,IL2RG,CTSS,ACSL5,ABCC3,MASP1,GALNT3,MYO6,RAPGEF5,ARHGAP…
Coexpression	M40112	DESCARTES_MAIN_FETAL_INTESTINAL_EPITHELIAL_CELLS	C8: Cell Type Signature	1.21e-16	1.17e-12	2.29e-14	2.23e-13	22	90	CDX2,MELTF,VIL1,APOA4,FADS6,XPNPEP2,MTTP,C1QTNF12,URAD,MOGAT3,DGAT1,ACSL5,MYO1A,TINAG,LCN15,LPGAT1,TRIM15,SLC26A3,GPR35,SLC17A4,MUC12,MALRD1
Coexpression Atlas	gudmap_kidney single cell_adult_RenalCortexMixed_Scamp_100	kidney single cell_adult_RenalCortexMixed_StemCellamp_top-relative-expression-ranked_100	Gudmap Mouse MOE430.2	1.57e-16	6.37e-13	5.74e-15	5.1e-14	23	85	EPHX2,HGD,ME1,MEP1A,ALDOB,SELENOP,SLC3A1,ATP1B1,PECR,PRSS8,GATM,RETSAT,APOM,TINAG,CHPT1,CALML4,CA2,SLC27A2,TMT1B,CRYL1,LACTB2,CDA,CDH16
Coexpression Atlas	Arv_SC_fibroblast_1000_K5	AravindRamakr_StemCell_from_inducedPluripotentialStemCells_derived from_from_fibroblast_top-relative-expression-ranked_1000_k-means-cluster#5	PCBC	2.01e-16	8.19e-13	7.31e-15	6.5e-14	32	183	CDX2,AOC1,CEACAM7,FABP1,MEP1A,SERPINA1,ALDOB,ALPI,TMEM253,PRR15L,APOA1,APOA4,APOB,MUC13,MTTP,MYO1A,CDHR2,CDHR5,CLRN3,EPS8L3,CREB3L3,DMBT1,PHGR1,SLC39A5,SLC26A3,TRIM31,USH1C,LGALS4,MLXIPL,TSPAN8,GPA33,CDH17
Coexpression	M3645	DELYS_THYROID_CANCER_UP	C2:CGP: Chemical and Genetic Perturbations	2.15e-16	2.07e-12	3.98e-14	3.88e-13	45	445	ERBB3,ADORA1,SERPINA1,MTUS1,HPN,QPCT,PLAG1,MMP7,ALOX15B,CLDN7,BHLHE40,ABCC6,LSR,SLC17A9,IGSF1,MUC1,CTSS,ABCC3,PRSS3,MYO1D,MYO6,CEACAM6,SPOCK2,ATP10B,TRIM14,CFB,ITPR3,NELL2,ATP11A,MVP,DPP4,P4HA2,SLC26A3,GALNT12,LAMC2,RGS3,LGALS3,SLC22A18,C1orf115,SLC16A4,LRP4,ELF3,CD151,PC,SLC6A14
GO: Biological Process	GO:0046942	carboxylic acid transport		2.68e-16	1.81e-12	5.47e-13	5.14e-12	48	414	CEACAM5,SLCO2B1,CEACAM7,ATP8B1,FABP1,ADORA1,AGT,HRH2,ABCG2,ABCC2,SLC51A,XK,PPARA,CPT1A,SLC1A1,ABCC6,SLC3A1,SLC51B,SLC6A8,SLC15A1,SLCO2A1,MTTP,PRKCD,ACSL5,ABCC3,SLC36A1,MYO6,CEACAM6,SLC46A1,TNFRSF11A,SLC36A2,CEACAM1,SLC38A3,SLC27A2,HNF1A,DPYSL2,SLC26A3,SLC26A2,SLC19A3,SFXN1,SLC25A22,ACE2,LLGL2,P2RX4,SLC16A4,SLC16A3,PAK1,SLC6A14
GO: Biological Process	GO:0015849	organic acid transport		3.25e-16	2.19e-12	5.47e-13	5.14e-12	48	416	CEACAM5,SLCO2B1,CEACAM7,ATP8B1,FABP1,ADORA1,AGT,HRH2,ABCG2,ABCC2,SLC51A,XK,PPARA,CPT1A,SLC1A1,ABCC6,SLC3A1,SLC51B,SLC6A8,SLC15A1,SLCO2A1,MTTP,PRKCD,ACSL5,ABCC3,SLC36A1,MYO6,CEACAM6,SLC46A1,TNFRSF11A,SLC36A2,CEACAM1,SLC38A3,SLC27A2,HNF1A,DPYSL2,SLC26A3,SLC26A2,SLC19A3,SFXN1,SLC25A22,ACE2,LLGL2,P2RX4,SLC16A4,SLC16A3,PAK1,SLC6A14
Coexpression Atlas	gudmap_developingLowerUrinaryTract_e13.5_bladder neck-urethr epithel_1000	DevelopingLowerUrinaryTract_e13.5_bladder neck-urethr epithel_emap-30875_top-relative-expression-ranked_1000	Gudmap Mouse MOE430.2	3.27e-16	1.33e-12	1.18e-14	1.05e-13	69	800	ERBB3,PLCXD1,WIPF3,ATP8B1,CYP2S1,KLF4,F3,POF1B,PLEKHH1,SIAE,HOXD1,PIK3CB,HPN,UGT8,FBXO32,FXYD3,PLS1,BNIP5,RNF186,KIF16B,TMPRSS4,CXCL14,SLC39A4,TMC4,CLDN3,CLDN7,VSIG10,CDCP1,BHLHE40,ZFP36,SLCO2A1,CCDC68,RASEF,ATF3,OCLN,ATP1B1,MCTP2,CXADR,SORL1,SLC36A1,TMEM135,ABHD3,PAQR5,SPOCK2,ISG20,STEAP2,RNF43,PTPN3,KLF5,COBL,MARVELD3,CA2,SLC27A2,NPNT,TCF7L2,RAB25,TRIM2,RCAN1,LAMC2,CXCL16,MAP7,SYT7,LGALS3,RASSF…
Coexpression	M1941	MEISSNER_BRAIN_HCP_WITH_H3K4ME3_AND_H3K27ME3	C2:CGP: Chemical and Genetic Perturbations	3.77e-16	3.63e-12	6.85e-14	6.68e-13	73	1074	TSPAN15,ERBB3,HK2,ENPP1,CARD10,ATP8B1,KLF4,F3,TFCP2L1,NDRG1,CLIC5,MTUS1,PLAG1,PLOD2,VIPR1,VIPR2,AGPAT2,CXCL14,PPARA,VSIG10,CPT1A,ZFP36,TXNIP,SLC9A3,SHROOM1,PLPP3,SLCO2A1,FRZB,TMEM37,RASEF,ATF3,ARHGAP27,OCLN,ATP1B1,PRDM16,CXADR,GALNT3,PAQR5,GCNT1,TRIM14,GDNF,ITPKA,ITPR3,BMP2,PTPN3,FZD5,TMEM163,MARVELD3,RAB3B,SLC27A2,NPNT,NDNF,EGLN3,TCF7L2,RBP4,LAMC2,CXCL16,GRIK3,PTPN18,ATP10A,LGALS3,RSPO3,MLXIPL,R…
GO: Cellular Component	GO:0031526	brush border membrane		4.17e-16	2.61e-13	4.35e-14	3.05e-13	24	98	CEACAM5,CEACAM7,ATP8B1,MUC17,PIK3CB,NPC1L1,ABCG2,ABCC2,ANPEP,SLC3A1,SLC9A3,SLC22A5,MTTP,CDHR2,CEACAM6,CDHR5,SLC46A1,CEACAM1,SLC26A3,SLC11A2,AMN,SLC17A4,ACE2,SLC6A14
Coexpression Atlas	gudmap_developingKidney_e15.5_cortic collect duct_500	DevelopingKidney_e15.5_cortic collect duct_emap-28132_top-relative-expression-ranked_500	Gudmap Mouse MOE430.2	4.52e-16	1.84e-12	1.62e-14	1.44e-13	46	390	RGMB,ERBB3,GCNT3,MGAT4A,ATP8B1,PLAC8,TFCP2L1,HOXD1,AFP,UGT8,PLAG1,RBM47,MUC20,VEGFA,RNF186,SGPP2,HKDC1,CLDN3,CLDN7,TMEM45B,RHPN2,OCLN,ATP1B1,MUC1,PRDM16,SORL1,PRSS8,GALNT3,KIF12,ATP10B,GJB1,TINAG,CHPT1,NPNT,DPP4,RAB17,LAMC2,GLB1L2,LGALS3,TFRC,SLC35A3,TSPAN8,TMPRSS2,EPCAM,PADI2,CDH16
Coexpression	M2772	ESC_V6.5_UP_LATE.V1_UP	C6: Oncogenic Signature	5.3e-16	5.1e-12	9.44e-14	9.21e-13	29	184	TTR,NDRG1,AFP,HPN,FGB,PLOD2,VIL1,SELENOP,MOGAT2,APOA1,APOB,FRZB,MTTP,OCLN,FXYD2,PRSS8,MYO6,SPOCK2,APOM,BMP2,DPP4,P4HA2,EGLN3,TCN2,GPX3,RBP4,EFNA1,P4HA1,TMPRSS2
Coexpression	M40175	DESCARTES_FETAL_EYE_CORNEAL_AND_CONJUNCTIVAL_EPITHELIAL_CELLS	C8: Cell Type Signature	5.4e-16	5.19e-12	9.45e-14	9.21e-13	33	244	GCNT3,F3,FAM3D,PLAC8,S100A6,SERPINA1,FXYD3,MUC20,KIAA1522,TMPRSS4,CXCL14,CP,TMC4,CLDN3,CLDN7,ATF3,MUC1,MUC4,TJP3,PRSS8,CEACAM6,GBP3,CFB,TTC22,RAB25,KCNE3,SLC44A4,LGALS3,TFF3,SERPINB1,TMPRSS2,ELF3,EPCAM
Coexpression Atlas	Arv_SC-hpx_blastocyst_2500_K4	AravindRamakr_StemCell-hypoxiaGrown_fromBlastocyst-derived-humanEmbryonicStemCells_top-relative-expression-ranked_2500_k-means-cluster#4	PCBC	6.25e-16	2.55e-12	2.21e-14	1.97e-13	48	426	CEACAM5,AOC1,GCNT3,CEACAM7,FAM3D,FABP1,MEP1A,MUC17,CCL20,FXYD3,ALDOB,ALPI,EPB41L4B,SGPP2,PRR15L,TMPRSS4,APOA4,CLDN7,MUC13,GDA,MISP,TRIB3,TMEM45B,C15orf48,PRSS8,MYO1A,CDHR2,FAM83E,CEACAM6,CDHR5,IL22RA1,CLRN3,FZD5,EPS8L3,CREB3L3,DMBT1,PHGR1,SLC39A5,SLC26A3,RAB25,LINC01559,ARRDC4,GPX2,TRIM31,LGALS4,TFF3,C1orf115,TSPAN8
Coexpression Atlas	gudmap_developingKidney_e15.5_cortic collect duct_1000	DevelopingKidney_e15.5_cortic collect duct_emap-28132_top-relative-expression-ranked_1000	Gudmap Mouse MOE430.2	7.64e-16	3.11e-12	2.68e-14	2.38e-13	67	774	RGMB,PHYKPL,ERBB3,AOC1,GCNT3,CHDH,MGAT4A,ATP8B1,PLAC8,TFCP2L1,HOXD1,AFP,HPN,CGN,UGT8,PLAG1,ALDOB,RBM47,MUC20,VEGFA,USP53,RNF186,SGPP2,HKDC1,CLDN3,CLDN7,CDCP1,TMEM45B,RHPN2,OCLN,ATP1B1,MUC1,PRDM16,CXADR,SORL1,PRSS8,GALNT3,MYO1D,IQGAP2,MYO6,PAQR5,KIF12,ATP10B,GDNF,GJB1,TINAG,CHPT1,CLRN3,MARVELD3,SLC27A2,NPNT,DPP4,RAB17,SLC26A2,LAMC2,GLB1L2,MAP7,SLC44A4,LGALS3,TFRC,SLC35A3,KIAA1217,TSPAN8,TMPRSS2,EP…
Coexpression Atlas	PCBC_ratio_MESO-15_from-ESC_vs_MESO-15_from-OSK-L-l-p53KD_cfr-2X-p05	Mesoderm Day 15-reprogram_NA_vs_Mesoderm Day 15-reprogram_OSK-L-l-p53KD-Confounder_removed-fold2.0_adjp0.05	PCBC_AltAnalyze	7.92e-16	3.22e-12	2.73e-14	2.43e-13	31	179	SLCO2B1,CYP2S1,HAVCR1,SLC51A,GLTPD2,VTN,ANPEP,APOA4,XPNPEP2,TXNIP,IGF2,SLC17A9,IGSF1,URAD,ACSL5,CAPN12,ABCC3,MASP1,GCNT1,BMP2,KLF5,GNRH2,DPP4,RAB17,AMN,ARRDC4,TMPRSS6,TMT1B,SLC44A4,HHLA2,TM4SF4
Coexpression Atlas	PCBC_ratio_MESO-15_from-ESC_vs_MESO-15_from-episomal_cfr-2X-p05	Mesoderm Day 15-method_NA_vs_Mesoderm Day 15-method_episomal-Confounder_removed-fold2.0_adjp0.05	PCBC_AltAnalyze	7.92e-16	3.22e-12	2.73e-14	2.43e-13	31	179	SLCO2B1,CYP2S1,HAVCR1,SLC51A,GLTPD2,VTN,ANPEP,APOA4,XPNPEP2,TXNIP,IGF2,SLC17A9,IGSF1,URAD,ACSL5,CAPN12,ABCC3,MASP1,GCNT1,BMP2,KLF5,GNRH2,DPP4,RAB17,AMN,ARRDC4,TMPRSS6,TMT1B,SLC44A4,HHLA2,TM4SF4
Coexpression	M2108	VECCHI_GASTRIC_CANCER_ADVANCED_VS_EARLY_DN	C2:CGP: Chemical and Genetic Perturbations	8.29e-16	7.97e-12	1.42e-13	1.39e-12	26	146	HGD,GCNT3,GOLM1,FAM3D,ABCG2,FXYD3,ALDOB,DHRS11,TMEM45B,RHPN2,MUC1,PRSS3,ATP10B,ISG20,GCNT1,VILL,CLRN3,CALML4,CA2,KCNE3,TFF2,LGALS4,TFF3,SERPINB1,TMPRSS2,GPA33
Coexpression	M10961	GOZGIT_ESR1_TARGETS_DN	C2:CGP: Chemical and Genetic Perturbations	1.11e-15	1.07e-11	1.87e-13	1.82e-12	60	785	TSPAN15,CEACAM5,ENPP1,LDOC1,POF1B,S100A6,SERPINA1,HOXC6,SCNN1A,AK4,CCL5,FBXO32,DEGS2,MUC20,VIL1,PRR15L,TMPRSS4,CP,CLDN3,CPT1A,SLC1A1,SLC6A8,FAR2,TMEM45B,ATP1B1,ATP2A3,CTSS,MASP1,PRSS8,MYO6,TNFSF10,CEACAM6,FAXDC2,IRF7,ISG20,RNF43,CFB,HAGLR,CEACAM1,NELL2,MARVELD3,MVP,SLC27A2,NPNT,CPEB2,CA12,EGLN3,TRIM2,GPX2,CXCL16,GRIK3,AHCYL2,PAPSS2,TNFRSF11B,TFF3,ABLIM1,PLLP,PCSK6,SERPINA5,SLC6A14
Coexpression Atlas	gudmap_developingLowerUrinaryTract_e15.5_urothelium_200	DevelopingLowerUrinaryTract_e15.5_Urothelium_emap-28091_top-relative-expression-ranked_200	Gudmap Mouse MOE430.2	1.17e-15	4.74e-12	3.99e-14	3.54e-13	29	157	GCNT3,MGAT4A,ATP8B1,LDOC1,FAM3D,TTR,POF1B,S100A6,AFP,UGT8,FXYD3,RBM47,CLDN3,CLDN7,CDCP1,TMEM45B,CCDC68,OCLN,PRDM16,ABCC3,PAQR5,GCNT1,TINAG,MARVELD3,GLB1L2,LGALS3,TSPAN8,TMPRSS2,CDH16
Coexpression	M624	HOLLERN_EMT_BREAST_TUMOR_DN	C2:CGP: Chemical and Genetic Perturbations	1.24e-15	1.19e-11	2.06e-13	2.01e-12	24	123	ERBB3,CHDH,POF1B,PLEKHH1,FXYD3,EPB41L4B,TMC4,CLDN3,CLDN7,CDCP1,LSR,RHPN2,OCLN,CXADR,TJP3,PRSS8,RNF43,CEACAM1,RAB25,MAP7,ELMO3,LLGL2,TMPRSS2,EPCAM
GO: Cellular Component	GO:0005902	microvillus		1.43e-15	8.94e-13	1.28e-13	8.96e-13	27	135	CEACAM5,CEACAM7,MUC17,MUC20,VIL1,MTTP,CTNNA1,MUC4,MYO1A,MYO1D,IQGAP2,MYO6,MYO7B,CDHR2,CEACAM6,CDHR5,ANKS4B,CEACAM1,PTPRH,CA2,ESPN,KIF13B,DPEP1,AMN,SLC26A2,USH1C,SCARB1
Coexpression Atlas	gudmap_developingKidney_e15.5_Medullary collecting duct_1000_k3	DevelopingKidney_e15.5_Medullary collecting duct_emap-28063_k-means-cluster#3_top-relative-expression-ranked_1000	Gudmap Mouse MOE430.2	1.62e-15	6.58e-12	5.49e-14	4.88e-13	30	171	CNKSR1,ERBB3,GCNT3,F3,PLAC8,TFCP2L1,HOXD1,CGN,CAMSAP3,SGPP2,HKDC1,TMC4,CLDN3,CLDN7,CDCP1,RHPN2,OCLN,PRDM16,SORL1,TJP3,ITPR3,MARVELD3,NPNT,WSCD1,RAB25,GALNT12,LLGL2,RASSF6,EPCAM,PADI2
GO: Biological Process	GO:0008610	lipid biosynthetic process		1.64e-15	1.11e-11	2.21e-12	2.08e-11	70	840	HEXB,CEACAM5,CEACAM7,MGLL,ST6GALNAC6,HNF4A,FAM3D,CLCN2,PIK3CB,SCD,AGT,NPC1L1,OSBPL9,UGT8,SMPD3,DEGS2,ALOX15B,HSD17B7,ANG,MOGAT2,PRXL2B,FA2H,DHRS11,AGPAT2,SGPP2,APOA1,APOA2,APOA4,APOB,FADS6,PPARA,LPIN3,IGF2,FAR2,TRIB3,PLPP3,PRKCD,ATP1A1,MOGAT3,IPMK,DGAT1,ACSL5,PECR,CYP3A5,INSIG1,CYP27A1,ABHD3,CEACAM6,FAXDC2,ACSS2,ELOVL2,GGT1,ITPKA,CEACAM1,BMP2,CHPT1,LPGAT1,SLC27A2,HNF1A,TCF7L2,SRD5A3,NR1H3,SLC44A4…
Coexpression	M39049	MANNO_MIDBRAIN_NEUROTYPES_HENDO	C8: Cell Type Signature	1.91e-15	1.84e-11	3.11e-13	3.03e-12	64	888	SLCO2B1,ATP8B1,ACVRL1,KLF4,SQOR,MYORG,MFNG,CLIC5,MTUS1,FCGRT,PIK3CB,QPCT,PLAUR,ABCG2,DEGS2,USP53,FLNB,SELENOP,ANXA4,CPT1A,ZFP36,HAPLN1,TXNIP,LSR,SHROOM1,FAR2,TMEM45B,DOK4,SLCO2A1,TMEM37,CCDC68,ACSL5,IQGAP2,MYO6,RAPGEF5,PAQR5,IRF1,SPOCK2,TMBIM1,ITPR3,NQO1,TACC1,SLC38A3,CA2,DPEP1,RCAN1,TCN2,SLC26A2,RGS3,TFRC,LGALS9,ABLIM1,PLLP,C1orf115,EFNA1,EVA1B,SLC16A4,SLC16A3,SCARB1,PAM,CDA,NOSTRIN,TM4SF1,STOM
Coexpression Atlas	ratio_EB-fibro_vs_EB-cbCD34_500_K2	ratio_EmbryoidBody-fibro_vs_EmbryoidBody-derived-from_CD34-iPSC_top-relative-expression-ranked_500_k-means-cluster#2	PCBC	1.97e-15	8e-12	6.62e-14	5.88e-13	29	160	F2,FABP1,MEP1A,HAVCR1,SERPINA1,AFP,FGB,PLG,SERPINF2,ALOX15B,VTN,APOA1,APOA2,APOA4,APOB,SLC3A1,URAD,PRSS3,LCN15,SLC39A5,GNRH2,AMN,TMPRSS6,RBP4,SLC44A4,TF,TFF3,CCDC183,CDH17
Coexpression Atlas	gudmap_developingKidney_e15.5_early proxim tubul_100	DevelopingKidney_e15.5_early proxim tubul_emap-28005_top-relative-expression-ranked_100	Gudmap Mouse MOE430.2	2.06e-15	8.37e-12	6.86e-14	6.1e-13	21	76	HNF4A,TTR,MEP1A,AFP,HPN,SERPINF2,ALDOB,VIL1,APOA1,SLC3A1,TMEM45B,FXYD2,CDHR2,GGT1,APOM,TINAG,CLRN3,SLC27A2,DPP4,AMN,CDH16
Coexpression Atlas	gudmap_developingKidney_e15.5_Proximal Tubules_500_k4	DevelopingKidney_e15.5_Proximal Tubules_emap-28005_k-means-cluster#4_top-relative-expression-ranked_500	Gudmap Mouse MOE430.2	2.25e-15	9.17e-12	7.45e-14	6.63e-13	23	95	B3GALT5,HNF4A,PLEKHH1,SERPINA1,CAMK2N1,NDRG1,CLIC5,ALDOB,VIL1,FXYD2,CDHR2,STEAP2,GGT1,MTMR11,CLRN3,SLC39A5,SLC27A2,CA12,DPP4,SLC44A4,ACE2,LACTB2,PRR15
Coexpression Atlas	gudmap_developingKidney_e15.5_Proximal Tubules_200	DevelopingKidney_e15.5_Proximal Tubules_emap-28005_top-relative-expression-ranked_200	Gudmap Mouse MOE430.2	2.29e-15	9.34e-12	7.53e-14	6.69e-13	28	149	CHDH,HNF4A,MEP1A,AFP,SERPINF2,ALDOB,RBM47,VIL1,SLC1A1,SLC3A1,UNC5CL,FXYD2,CDHR2,KIF12,PBLD,GCNT1,STEAP2,GGT1,TINAG,CLRN3,SLC39A5,SLC27A2,DPP4,AMN,SLC44A4,SGK2,MLXIPL,CDH16
Coexpression	M6175	CAIRO_LIVER_DEVELOPMENT_DN	C2:CGP: Chemical and Genetic Perturbations	2.48e-15	2.39e-11	3.98e-13	3.88e-12	31	225	SERPINF1,F2,SQOR,PLAC8,SERPINA1,NDRG1,HPN,AGT,FGB,PLG,SERPINF2,VTN,SLC39A4,APOB,PPARA,ABCC6,SEMA4G,MST1,CYP27A1,ISG20,TNFRSF11A,ITIH2,GJB1,TACC1,SLC38A3,KIF13B,SLC44A4,LGALS9,ENTPD5,CD68,TMPRSS2
Coexpression Atlas	gudmap_developingKidney_e15.5_S-shaped body_200_k5	DevelopingKidney_e15.5_S-shaped body_emap-27855_k-means-cluster#5_top-relative-expression-ranked_200	Gudmap Mouse MOE430.2	2.66e-15	1.08e-11	8.66e-14	7.7e-13	17	45	HLA-DMB,HNF4A,MEP1A,SERPINA1,ALDOB,RBM47,FXYD2,PRSS8,KIF12,GCNT1,GGT1,APOM,TINAG,SLC27A2,DPP4,AMN,ACE2
Coexpression Atlas	gudmap_developingKidney_e15.5_Medullary collecting duct_1000_k2	DevelopingKidney_e15.5_Medullary collecting duct_emap-28063_k-means-cluster#2_top-relative-expression-ranked_1000	Gudmap Mouse MOE430.2	2.88e-15	1.17e-11	9.32e-14	8.28e-13	23	96	TUBA4A,CLIC5,AFP,HPN,RBM47,TMEM45B,ATP1B1,PRSS8,GALNT3,MYO1D,MYO6,PAQR5,KIF12,TINAG,SEMA3B,NPNT,DPP4,MAP7,SLC44A4,SLC22A18,USP2,CLMN,TMPRSS2
Coexpression	M2299	VANDESLUIS_COMMD1_TARGETS_GROUP_3_UP	C2:CGP: Chemical and Genetic Perturbations	3.12e-15	3e-11	4.92e-13	4.8e-12	20	82	PLCXD1,AFP,ALDOB,ERO1A,CAMSAP3,HKDC1,APOA2,APOA4,LSR,PRSS8,SLC39A5,EGLN3,KCNE3,AMN,TF,RNASE4,SLC16A3,SCARB1,TSPAN8,LY75
GO: Cellular Component	GO:0045178	basal part of cell		4.35e-15	2.72e-12	3.4e-13	2.39e-12	44	381	ERBB3,CEACAM5,SLCO2B1,ENPP1,CEACAM7,ADORA1,SLC51A,MUC20,CLDN7,ABCC6,SLC51B,PLPP3,SLCO2A1,SLC22A5,MTTP,ATP1A1,ATP1B1,FXYD2,CXADR,ABCC3,MYO1A,MYO1D,CEACAM6,SLC46A1,ITGB4,HEPH,CEACAM1,SLC39A5,SLC38A3,CA2,CA12,KCNE3,SLC11A2,RAB17,MAP7,TF,TFRC,CNNM4,SLC16A3,SCARB1,SLC39A14,EPCAM,CDH16,CDH17
Coexpression Atlas	facebase_RNAseq_e10.5_OlfacPit_2500	facebase_RNAseq_e10.5_OlfacPit_2500	Gudmap RNAseq	4.58e-15	1.86e-11	1.47e-13	1.31e-12	97	1453	RGMB,CNKSR1,ERBB3,SYN3,RIMKLA,ACHE,MGAT4A,WIPF3,TUBA4A,DSCAML1,POF1B,MYORG,CKB,PLEKHH1,MFNG,CAMK2N1,CLCN2,HOOK1,MTUS1,SH3RF2,SCD,HPN,PCDH19,CGN,AK4,FBXO32,FXYD3,RBM47,PLS1,CORO2A,CAMSAP3,SGPP2,PRR15L,CLDN3,CLDN7,CDCP1,CLSTN1,LPIN3,MST1,LSR,GDA,CADPS,CCDC68,RASEF,OCLN,ATP1B1,MUC1,PRDM16,MCTP2,CXADR,ACSL5,MXI1,SORL1,TJP3,TTC39B,ANO9,PRSS8,GALNT3,INSIG1,GATM,GCHFR,ACSS2,GDNF,RNF43,ELOVL2,ITIH2,PTPN3…
Coexpression Atlas	gudmap_developingLowerUrinaryTract_P2_bladder stroma (LCM)_1000	DevelopingLowerUrinaryTract_P2_bladder stroma (LCM)_emap-30396_top-relative-expression-ranked_1000	Gudmap Mouse MOE430.2	4.66e-15	1.9e-11	1.48e-13	1.32e-12	66	783	HEXB,GCNT3,SLCO2B1,ENPP2,MGAT4A,MGLL,ATP8B1,ACVRL1,KLF4,ME1,SQOR,TTR,POF1B,MEP1A,PLEKHH1,S100A6,ADORA1,MFNG,CLIC5,AFP,QPCT,PLCB4,FXYD3,ALDOB,ANXA4,CXCL14,CP,TXNIP,ZFYVE28,GDA,TMEM45B,RAB11FIP5,MUC1,FXYD2,ABCC3,CYP3A5,CYP27A1,PAQR5,ISG20,ITGB2,TMBIM1,CFB,ITPKA,TINAG,SULT1A1,CALML4,SLC27A2,DPEP1,AMN,NTRK1,GPX3,RBP4,LAMA2,PTPN18,ATP10A,LGALS3,GREM2,SLC44A1,RNASE4,P2RX4,SCARB1,TSPAN8,SERPINB1,TMPRSS2…
Coexpression	MM1300	VANDESLUIS_COMMD1_TARGETS_GROUP_3_UP	M2:CGP: Chemical and Genetic Perturbations	5.17e-15	4.97e-11	8.01e-13	7.81e-12	20	84	PLCXD1,AFP,ALDOB,ERO1A,CAMSAP3,HKDC1,APOA2,APOA4,LSR,PRSS8,SLC39A5,EGLN3,KCNE3,AMN,TF,RNASE4,SLC16A3,SCARB1,TSPAN8,LY75
Coexpression	M42506	FOROUTAN_INTEGRATED_TGFB_EMT_DN	C2:CGP: Chemical and Genetic Perturbations	5.51e-15	5.3e-11	8.42e-13	8.2e-12	19	74	ERBB3,ATP8B1,MTUS1,SCNN1A,MMP7,RBM47,PLS1,EPB41L4B,FA2H,CP,LSR,CXADR,CEACAM6,CFB,SLC27A2,RAB25,SERPINB1,ELF3,EPCAM
Coexpression Atlas	gudmap_developingKidney_e15.5_Proximal Tubules_1000_k1	DevelopingKidney_e15.5_Proximal Tubules_emap-28005_k-means-cluster#1_top-relative-expression-ranked_1000	Gudmap Mouse MOE430.2	7.5e-15	3.05e-11	2.37e-13	2.1e-12	23	100	ERBB3,HLA-DMB,TFCP2L1,HOOK1,UGT8,RBM47,USP53,SGPP2,CDCP1,OCLN,ATP1B1,SORL1,ANO9,GALNT3,PAQR5,GJB1,NPNT,RAB17,MAP7,RASSF6,CLMN,TMPRSS2,CDH16
Coexpression Atlas	gudmap_kidney_adult_CortVasc_Tie2_k4_500	kidney_adult_CortVasc_Tie2_k-means-cluster#4_top-relative-expression-ranked_500	Gudmap Mouse MOE430.2	7.71e-15	3.14e-11	2.41e-13	2.15e-12	27	144	HGD,SQOR,MEP1A,SERPINA1,NDRG1,ALDOB,SELENOP,SLC3A1,ATP1B1,FXYD2,PECR,MYO6,GATM,CDHR5,GCNT1,GGT1,TINAG,CHPT1,CALML4,CA2,SLC27A2,DPEP1,TCN2,TMT1B,GPX3,LACTB2,CDH16
GO: Cellular Component	GO:0009925	basal plasma membrane		8.02e-15	5.01e-12	5.57e-13	3.91e-12	42	355	ERBB3,CEACAM5,SLCO2B1,ENPP1,CEACAM7,ADORA1,SLC51A,MUC20,CLDN7,ABCC6,SLC51B,PLPP3,SLCO2A1,SLC22A5,MTTP,ATP1A1,ATP1B1,FXYD2,CXADR,ABCC3,MYO1A,MYO1D,CEACAM6,SLC46A1,ITGB4,HEPH,CEACAM1,SLC39A5,SLC38A3,CA2,CA12,RAB17,MAP7,TF,TFRC,CNNM4,SLC16A3,SCARB1,SLC39A14,EPCAM,CDH16,CDH17
Coexpression Atlas	gudmap_kidney_P0_JuxtaGlom_Ren1_500	kidney_P0_JuxtaGlom_Ren1_top-relative-expression-ranked_500	Gudmap Mouse MOE430.2	8.88e-15	3.61e-11	2.76e-13	2.45e-12	48	456	HGD,ENPP2,PFKP,HNF4A,TUBA4A,MEP1A,TFCP2L1,NDRG1,MTUS1,AFP,ALDOB,RBM47,ANPEP,SLC3A1,IGF2,SLCO2A1,CCDC68,PCP4L1,ATP1B1,FXYD2,PRDM16,IQGAP2,RAPGEF5,GCNT1,GGT1,TINAG,VILL,CLRN3,CALML4,CA2,SLC27A2,NPNT,DPP4,STBD1,TCN2,GPX3,GLB1L2,PAPSS2,ACE2,LACTB2,LMO7,ENTPD5,TSPAN8,TMPRSS2,TM4SF1,EPCAM,CDH16,STOM
Coexpression Atlas	gudmap_developingLowerUrinaryTract_P2_bladder urothelium (LCM)_500	DevelopingLowerUrinaryTract_P2_bladder urothelium (LCM)_emap-30380_top-relative-expression-ranked_500	Gudmap Mouse MOE430.2	9.28e-15	3.78e-11	2.86e-13	2.55e-12	44	389	GCNT3,TLCD4,MGAT4A,ATP8B1,SQOR,FAM3D,TTR,POF1B,PLEKHH1,S100A6,DEGS2,FXYD3,RBM47,FA2H,ANXA4,CXCL14,XK,TMC4,CLDN7,CDCP1,TMEM45B,CCDC68,RAB11FIP5,OCLN,SDCBP2,ABCC3,PRSS8,GALNT3,PAQR5,ATP10B,GCNT1,BMP2,DIAPH1,MARVELD3,CPEB2,DPEP1,RAB25,RBP4,LAMC2,GLB1L2,TF,LGALS3,TSPAN8,TMPRSS2
Coexpression	M1884	YOSHIMURA_MAPK8_TARGETS_UP	C2:CGP: Chemical and Genetic Perturbations	1.14e-14	1.1e-10	1.71e-12	1.67e-11	78	1277	EPHX2,ERBB3,HLA-DMA,ACHE,CEACAM7,FOXA3,FABP1,MEP1A,SERPINA1,HOOK1,AGT,SCNN1A,FGB,CCL5,PLAUR,MMP7,CCL20,PLG,ALDOB,ALPI,SELENOP,VTN,EPB41L4B,SH3KBP1,CXCL14,APOA1,APOB,CLDN3,CLDN7,PPARA,MUC13,SLC1A1,IGF2,SLC15A1,ASL,PCP4L1,MAPK3,MUC1,FXYD2,ATP2A3,CTSS,MXI1,MASP1,CYP2B6,MYO1A,PDX1,ITGB4,CFB,GGT1,ITPKA,CEACAM1,PTPN3,GJB1,NELL2,PTPRH,RAB3B,CA2,SLC27A2,DPEP1,DPP4,ADAP1,TMT1B,RBP4,SYT7,TF,LGALS4,TFF3,LGA…
Coexpression Atlas	Arv_SC-HD_2500_K2	AravindRamakr_StemCell-HD_top-relative-expression-ranked_2500_k-means-cluster#2	PCBC	1.14e-14	4.64e-11	3.49e-13	3.1e-12	81	1113	ERBB3,SYN3,RIMKLA,ENPP1,WIPF3,B3GALT5,CYP2S1,ZBED10P,FOXA3,HNF4G,FABP1,HOOK1,MUC17,HPN,CGN,SCNN1A,UGT8,ALDOB,RBM47,PLS1,LRRC75A,BAIAP2L2,ALPI,ALPG,VIL1,VIPR1,CAMSAP3,TMEM253,APOA4,CLDN3,MUC13,LSR,C1orf226,SLC15A1,RHPN2,TMEM37,IGSF1,OCLN,MUC3A,MUC4,TJP3,MYO1A,CDHR2,KIF12,GDPD2,CDHR5,STEAP2,NELL2,NR1I2,TMEM92,CLRN3,FZD5,COBL,MARVELD3,EPS8L3,B4GALNT3,CREB3L3,DMBT1,PHGR1,TRIM15,INHBE,SLC26A3,RAB17,CE…
Transcription Factor Binding Site	CAGGTG_V$E12_Q6	CAGGTG_V$E12_Q6	TFBS	1.25e-14	1.26e-11	1.26e-11	9.4e-11	98	1950	ERBB3,CDX1,GCNT3,ENPP2,KLF4,FOXA3,HNF4A,DSCAML1,CKB,MFNG,HOOK1,MTUS1,HPN,SCNN1A,OSBPL9,PLAG1,SMPD3,FBXO32,CCL20,SERPINF2,RBM47,PLOD2,SEMA4B,FLNB,SELENOP,EPB41L4B,CORO2A,FA2H,MYO18A,TMPRSS4,CXCL14,APOA2,POU4F1,CLDN3,CLDN7,PPARA,CDCP1,SLC1A1,SEMA4G,IGF2,SLCO2A1,PRKCSH,IGSF1,OCLN,ATP1B1,PRDM16,IL6R,CXADR,PRSS3,MASP1,IQGAP2,RAPGEF5,ARHGAP26,GATM,KIF12,GDPD2,IRF1,SPOCK2,APOBR,ITGB4,GDNF,ITPKA,ITPR3,GJ…
Coexpression Atlas	gudmap_developingKidney_e14.5 whole kidney - wildtype_500_k1	DevelopingKidney_e14.5 whole kidney - wildtype_emap-6674_k-means-cluster#1_top-relative-expression-ranked_500	Gudmap Mouse MOE430.2	1.44e-14	5.85e-11	4.37e-13	3.88e-12	21	83	HNF4A,MEP1A,SERPINA1,RBM47,PLS1,VIL1,UNC5CL,GCNT1,STEAP2,ELOVL2,CLRN3,FZD5,COBL,SLC27A2,NPNT,CA12,DPP4,SGK2,ACE2,LACTB2,LMO7
Coexpression	MM1274	CAIRO_LIVER_DEVELOPMENT_DN	M2:CGP: Chemical and Genetic Perturbations	1.52e-14	1.47e-10	2.25e-12	2.2e-11	31	240	SERPINF1,F2,SQOR,PLAC8,SERPINA1,NDRG1,HPN,AGT,FGB,PLG,SERPINF2,VTN,SLC39A4,APOB,PPARA,ABCC6,SEMA4G,MST1,CYP27A1,ISG20,TNFRSF11A,ITIH2,GJB1,TACC1,SLC38A3,KIF13B,SLC44A4,LGALS9,ENTPD5,CD68,TMPRSS2
Coexpression Atlas	Arv_SC-H9hpx_2500_K2	AravindRamakr_StemCell-H9hpx_top-relative-expression-ranked_2500_k-means-cluster#2	PCBC	1.52e-14	6.19e-11	4.59e-13	4.08e-12	46	428	CEACAM5,AOC1,GCNT3,CEACAM7,FAM3D,FABP1,MEP1A,MUC17,CCL20,FXYD3,ALDOB,ALPI,SGPP2,PRR15L,TMPRSS4,CXCL14,APOA4,CLDN7,MUC13,SLC51B,GDA,MISP,TRIB3,TMEM45B,C15orf48,MYO1A,CDHR2,FAM83E,CEACAM6,CDHR5,IL22RA1,CLRN3,EPS8L3,CREB3L3,DMBT1,PHGR1,SLC39A5,SLC26A3,RAB25,LINC01559,ARRDC4,GPX2,TRIM31,LGALS4,TSPAN8,GPA33
Coexpression Atlas	gallbladder	gallbladder	Human Protein Atlas	1.56e-14	6.37e-11	4.68e-13	4.16e-12	27	148	GCNT3,B3GALT5,SERPINA4,ABCC2,MMP7,CCL20,DUOXA2,DUOX2,SLC9A3,LRRC19,SLC15A1,FXYD2,MUC3A,CAPN12,KIF12,CEACAM6,NR1I2,CLRN3,EPS8L3,TCN1,GPX2,SLC17A4,RNF183,GREM2,ACE2,HHLA2,TM4SF4
Coexpression	M289	OISHI_CHOLANGIOMA_STEM_CELL_LIKE_DN	C2:CGP: Chemical and Genetic Perturbations	1.66e-14	1.6e-10	2.43e-12	2.36e-11	33	274	HK2,PLAC8,FABP1,MGAT3,NDRG1,QPCT,FXYD3,MGAM2,ANG,IFNGR1,MISP,PRKCD,MAPK3,FUT2,MUC1,ATP2A3,IL2RG,ACSL5,PRSS3,ARHGAP26,TMBIM1,SULT1B1,MTMR11,VILL,KLF5,TRIM31,SLC44A4,PAPSS2,INF2,SERPINB1,CDA,LY75,CDH17
Coexpression Atlas	gudmap_developingKidney_e15.5_early proxim tubul_1000_k4	DevelopingKidney_e15.5_early proxim tubul_emap-28005_k-means-cluster#4_top-relative-expression-ranked_1000	Gudmap Mouse MOE430.2	1.66e-14	6.74e-11	4.92e-13	4.38e-12	29	173	B3GALT5,HNF4A,PLEKHH1,SERPINA1,NDRG1,CLIC5,RBM47,VIL1,UNC5CL,CCDC68,ATP1B1,KIF12,PBLD,GCNT1,ACSS2,STEAP2,ELOVL2,MTMR11,CHPT1,SLC27A2,CA12,DPP4,SGK2,ACE2,MLXIPL,LACTB2,ENTPD5,PRR15,ENTPD8
Coexpression	M45680	HE_LIM_SUN_FETAL_LUNG_C0_MID_MESOTHELIAL_CELL	C8: Cell Type Signature	1.7e-14	1.63e-10	2.44e-12	2.38e-11	65	955	HEXB,TLCD4,TMEM176A,SNAP47,NDRG1,HOOK1,MTUS1,PRELID2,CGN,HRH2,PLAUR,SMPD3,SLC51A,USP53,SEMA4B,FLNB,TMEM176B,KIAA1522,MST1,LSR,DOK4,RHPN2,TMEM37,IL6R,CXADR,NAAA,ERAP1,GBP3,SPOCK2,IRF7,GCHFR,PTAFR,CFB,ITPR3,NELL2,LINC02381,KLF5,SEMA3B,NQO1,ATP11A,CALML4,MVP,CA2,NPNT,DPP4,P4HA2,ARRDC4,SLC26A2,LAMC2,PTPN18,NSUN7,RSPO3,SLC22A18,PLLP,RNASE4,EFNA1,SLC16A4,SLC16A3,INF2,LMO7,SCARB1,SERPINB1,TM4SF1,EPCAM,R…
Coexpression Atlas	gudmap_developingKidney_e15.5_early proxim tubul_500_k5	DevelopingKidney_e15.5_early proxim tubul_emap-28005_k-means-cluster#5_top-relative-expression-ranked_500	Gudmap Mouse MOE430.2	1.86e-14	7.58e-11	5.49e-13	4.88e-12	23	104	HGD,CHDH,MEP1A,PLEKHH1,AFP,SERPINF2,ALDOB,SLC1A1,SLC3A1,SLC51B,MISP,SLCO2A1,FXYD2,PAQR5,TINAG,CLRN3,CALML4,TMT1B,SLC44A4,ACE2,USP2,ENTPD5,PC
Coexpression Atlas	gudmap_kidney_adult_JuxtaGlom_Ren1_200	kidney_adult_JuxtaGlom_Ren1_top-relative-expression-ranked_200	Gudmap Mouse MOE430.2	2.12e-14	8.63e-11	6.16e-13	5.48e-12	28	162	EPHX2,HGD,ENPP2,MEP1A,NDRG1,SCNN1A,ABCC2,ALDOB,SELENOP,SLC3A1,SLCO2A1,ATP1B1,FXYD2,PECR,GATM,GCNT1,CFB,GGT1,TINAG,CALML4,CA2,SLC27A2,TCN2,GPX3,LACTB2,TSPAN8,TMPRSS2,CDH16
Coexpression Atlas	gudmap_developingKidney_e15.5_S-shaped body_200	DevelopingKidney_e15.5_S-shaped body_emap-27855_top-relative-expression-ranked_200	Gudmap Mouse MOE430.2	2.12e-14	8.63e-11	6.16e-13	5.48e-12	28	162	HLA-DMB,HNF4A,MEP1A,SERPINA1,CLIC5,ALDOB,RBM47,SGPP2,CXCL14,TMEM37,FXYD2,PRSS8,KIF12,GCNT1,GGT1,APOM,TINAG,SLC27A2,WSCD1,NDNF,DPP4,AMN,PAPSS2,ACE2,TSPAN8,PRR15,CDH4,CDH16
Coexpression	MM3824	TABULA_MURIS_SENIS_SUBCUTANEOUS_ADIPOSE_TISSUE_EPITHELIAL_CELL_AGEING	M8: Cell Type Signature	2.27e-14	2.18e-10	3.21e-12	3.13e-11	48	568	HEXB,HDHD3,CEACAM5,GCNT3,CEACAM7,CKB,MEP1A,SCD,PRR13,PLAUR,SLC51A,SELENOP,EPB41L4B,TMPRSS4,SLC39A4,MUC13,SIRT6,CPT1A,BHLHE40,TMEM45B,C15orf48,MAPK3,STX16,SDCBP2,CTSS,TTC39B,MYO1A,FAM83E,CEACAM6,CDHR5,TRIM14,CEACAM1,SULT1B1,CALML4,DMBT1,PHGR1,CA2,ESPN,DPYSL2,TCF7L2,TMT1B,RBP4,PAPSS2,TF,RGS3,LGALS4,SERPINB1,CDH17
Coexpression Atlas	GSM538242_500	Myeloid Cells, DC.4+.MLN, CD11b-FITC CD4-PE CD11c-Alexa750 CD8a-PacificBlue, Lymph Node, avg-3	Immgen.org, GSE15907	2.54e-14	1.03e-10	7.32e-13	6.51e-12	44	400	HLA-DMA,TMEM176A,KLF4,CKB,SEMA6D,PIK3CB,CCL5,RBM47,TMEM176B,ANPEP,ANXA4,FLVCR1,CDCP1,BHLHE40,ZFP36,ATF3,CTSS,IL6R,NAAA,CYP27A1,GATM,TNFRSF11A,PTAFR,CFB,BMP2,PTPN3,PTPRJ,CA2,TMEM150B,DPP4,ADAP1,ARRDC4,GPR35,CXCL16,PAPSS2,TSPAN3,SLC44A1,CD7,RASA4,PAK1,CD68,NOSTRIN,MXD1,STOM
Coexpression Atlas	gudmap_kidney_adult_RenCorpuscGlomer_1000	kidney_adult_RenCorpuscGlomer_top-relative-expression-ranked_1000	Gudmap Mouse MOE430.2	3.38e-14	1.38e-10	9.69e-13	8.62e-12	69	878	TSPAN15,MGAT4A,TMEM176A,MGLL,ATP8B1,ACVRL1,ST6GALNAC6,SQOR,PLAC8,S100A6,SERPINA1,HOXC6,CLIC5,MTUS1,SCD,OSBPL9,QPCT,ALDOB,PLOD2,VEGFA,SELENOP,FA2H,ANXA4,CP,IFNGR1,TXNIP,PLPP3,SLCO2A1,PCP4L1,ATP2A3,IL2RG,CTSS,ACSL5,TTC39B,MYO1D,IQGAP2,MYO6,TNFSF10,ERAP1,RAPGEF5,HCAR1,IRF7,TMBIM1,CEACAM1,GGH,CHPT1,PTPRJ,CALML4,RAB3B,SLC27A2,NPNT,DPP4,TCN2,GPX3,GLB1L2,LGALS9,TGFBR3,P2RX4,LACTB2,LMO7,LRRC1,TSPAN8,PAK1…
Coexpression	M1475	FLECHNER_BIOPSY_KIDNEY_TRANSPLANT_REJECTED_VS_OK_DN	C2:CGP: Chemical and Genetic Perturbations	3.46e-14	3.33e-10	4.82e-12	4.7e-11	47	553	EPHX2,HGD,ERBB3,AOC1,ENPP2,FABP1,NDRG1,CLIC5,HPN,UGT8,AK4,ABCC2,PLG,ALDOB,VEGFA,ANPEP,XPNPEP2,SLC1A1,ABCC6,CTNNA1,MXI1,MYO6,CYP3A5,GATM,GCHFR,GGT1,APOM,GGH,PTPN3,GJB1,CA2,SLC27A2,CA12,DPP4,TRIM2,RCAN1,GPX3,RBP4,TNFRSF11B,USP2,RNASE4,SLC16A4,ENTPD5,SLC39A14,PC,EPCAM,SERPINA5
Coexpression Atlas	gudmap_developingLowerUrinaryTract_P1_ureter_1000_k3	DevelopingLowerUrinaryTract_P1_ureter_emap-30363_k-means-cluster#3_top-relative-expression-ranked_1000	Gudmap Mouse MOE430.2	3.46e-14	1.41e-10	9.83e-13	8.74e-12	32	218	MGAT4A,ATP8B1,F3,FAM3D,POF1B,PLEKHH1,CLIC5,RBM47,PLS1,CP,CPT1A,GDA,TMEM45B,SLCO2A1,CCDC68,RASEF,ATF3,OCLN,SORL1,ABCC3,ATP10B,GCNT1,TMBIM1,MARVELD3,ARRDC4,GLB1L2,LGALS3,SLC44A1,TSPAN8,SERPINB1,TMPRSS2,TM4SF1
GO: Cellular Component	GO:0016323	basolateral plasma membrane		3.49e-14	2.18e-11	2.18e-12	1.53e-11	39	322	ERBB3,CEACAM5,SLCO2B1,ENPP1,CEACAM7,ADORA1,SLC51A,MUC20,CLDN7,ABCC6,SLC51B,PLPP3,SLC22A5,MTTP,ATP1A1,ATP1B1,FXYD2,CXADR,ABCC3,MYO1A,MYO1D,CEACAM6,SLC46A1,HEPH,CEACAM1,SLC39A5,SLC38A3,CA2,CA12,RAB17,MAP7,TFRC,CNNM4,SLC16A3,SCARB1,SLC39A14,EPCAM,CDH16,CDH17
Coexpression Atlas	GSM777032_500	Stromal Cells, BEC.MLN, gp38- CD31+, Lymph Node, avg-5	Immgen.org, GSE15907	3.76e-14	1.53e-10	1.06e-12	9.45e-12	47	456	TSPAN15,SLCO2B1,ENPP2,TMEM176A,MGLL,ATP8B1,ACVRL1,KLF4,ME1,FAM3D,LRG1,SERPINA1,NDRG1,CLIC5,PLCB4,ABCG2,TMEM176B,UBD,BHLHE40,ZFP36,GDA,PLPP3,SLCO2A1,PCP4L1,ATF3,TNFSF10,RAPGEF5,CFB,CEACAM1,SULT1A1,RCAN1,TCN2,ARRDC4,PAPSS2,TGFBR3,C1orf115,EFNA1,SUSD2,KIAA1217,SCARB1,SERPINB1,PAM,CD151,NOSTRIN,TM4SF1,PCDH1,STOM
Coexpression	M42504	FOROUTAN_PRODRANK_TGFB_EMT_DN	C2:CGP: Chemical and Genetic Perturbations	4.26e-14	4.1e-10	5.85e-12	5.7e-11	19	82	ERBB3,SQOR,HOOK1,MTUS1,SCNN1A,MMP7,RBM47,PLS1,EPB41L4B,MUC1,CXADR,SULT1A1,SLC27A2,MAP7,ABLIM1,C1orf115,SERPINB1,ELF3,EPCAM
Coexpression	MM16604	ZHANG_UTERUS_C1_REGENERATIVE_UP	M8: Cell Type Signature	4.9e-14	4.71e-10	6.64e-12	6.47e-11	34	302	CNKSR1,CEACAM5,HK2,CEACAM7,GOLM1,KLF4,F3,PLAC8,S100A6,SERPINA1,PLAUR,MUC20,TMPRSS4,ATF3,CTNNA1,MUC4,ACSL5,GALNT3,CEACAM6,TMBIM1,CFB,CEACAM1,KLF5,CA2,TRIM15,LAMC2,SLC44A4,LGALS3,TFRC,SERPINB1,ELF3,EPCAM,PADI2,MXD1
Coexpression Atlas	gudmap_kidney_adult_RenalCapsule_500	kidney_adult_RenalCapsule_top-relative-expression-ranked_500	Gudmap Mouse MOE430.2	5.14e-14	2.09e-10	1.44e-12	1.28e-11	44	408	SERPINF1,TMEM176A,MGLL,F3,SQOR,PLAC8,S100A6,NDRG1,MTUS1,SH3RF2,SCD,FXYD3,PLOD2,SELENOP,ANPEP,CP,TXNIP,SLCO2A1,CTSS,TTC39B,MYO1D,ERAP1,SPOCK2,GCNT1,CFB,KLF5,NPNT,DPP4,GPX3,RBP4,LAMA2,PAPSS2,TF,LGALS9,GREM2,RSPO3,RNASE4,LMO7,TSPAN8,SERPINB1,PAM,PRR15,TM4SF1,RSPO1
Coexpression Atlas	gudmap_developingKidney_e15.5_Medullary collecting duct_500_k1	DevelopingKidney_e15.5_Medullary collecting duct_emap-28063_k-means-cluster#1_top-relative-expression-ranked_500	Gudmap Mouse MOE430.2	5.42e-14	2.21e-10	1.51e-12	1.34e-11	16	45	HPN,RBM47,TMEM45B,ATP1A1,ATP1B1,PRSS8,GALNT3,PAQR5,KIF12,GJB1,TINAG,NPNT,DPP4,SLC44A4,USP2,TMPRSS2
Coexpression Atlas	mendel_RNAseq_e18.5_Urothelium_Krt5CreRFP_2500_K2	mendel_RNAseq_e18.5_Urothelium_Krt5CreRFP_2500_K2	Gudmap RNAseq	5.56e-14	2.26e-10	1.54e-12	1.37e-11	45	426	CNKSR1,ERBB3,KLF4,F3,DSCAML1,S100A6,SCD,CGN,AK4,PLAUR,FBXO32,CAMSAP3,TMC4,CLDN7,CDCP1,LSR,RASEF,OCLN,RNF39,TJP3,ANO9,PRSS8,SLC36A1,TNFSF9,SPOCK2,GCNT1,ITGB4,RNF43,PTPN3,KLF5,SEMA3B,MARVELD3,RAB3B,RAB25,GPX2,LAMC2,MAP7,LGALS3,EFNA1,LLGL2,KIAA1217,TMPRSS2,CD151,CDA,EPCAM
Coexpression Atlas	PCBC_ratio_SmallAirwayEpithel_vs_SC_cfr-2X-p05	Small Airway Epithelial_vs_Pluripotent Stem Cells-Confounder_removed-fold2.0_adjp0.05	PCBC_AltAnalyze	6.11e-14	2.49e-10	1.68e-12	1.49e-11	113	1903	CNKSR1,SERPINF1,CARD10,MGLL,ATP8B1,KLF4,ME1,F3,SQOR,TUBA4A,MYORG,S100A6,SIAE,MELTF,CAMK2N1,NDRG1,HPCAL1,SH3RF2,PLAUR,CCL20,FXYD3,PLOD2,ALOX15B,OSGIN1,VEGFA,SEMA4B,FLNB,CORO2A,KIAA1522,ERO1A,ANXA4,AGPAT2,SGPP2,KIF16B,CXCL14,TMC4,CLDN7,CDCP1,CLSTN1,BHLHE40,ZFP36,IFNGR1,LPIN3,TXNIP,MISP,IGF2,TRIB3,TMEM45B,RAB11FIP5,ATF3,ARHGAP27,RNF39,SDCBP2,IL6R,MXI1,TTC39B,ABCC3,ANO9,PRSS3,GALNT3,MYO1D,TNFSF10,ERA…
Coexpression Atlas	gudmap_developingLowerUrinaryTract_adult_ureter_1000_k3	DevelopingLowerUrinaryTract_adult_ureter_emap-29479_k-means-cluster#3_top-relative-expression-ranked_1000	Gudmap Mouse MOE430.2	6.54e-14	2.66e-10	1.79e-12	1.59e-11	31	209	ERBB3,MGAT4A,ATP8B1,F3,TUBA4A,POF1B,PLEKHH1,CGN,RBM47,PLS1,TMC4,CLDN7,CDCP1,TMEM45B,CCDC68,RASEF,OCLN,ATP1B1,SORL1,ABCC3,GALNT3,PAQR5,ATP10B,ITGB4,KLF5,MARVELD3,RAB25,LGALS3,RASSF6,TSPAN8,TMPRSS2
Coexpression Atlas	PCBC_ratio_EB bone marrow_vs_EB blastocyst_cfr-2X-p05	EB bone marrow_vs_EB blastocyst-Confounder_removed-fold2.0_adjp0.05	PCBC_AltAnalyze	6.94e-14	2.83e-10	1.88e-12	1.67e-11	46	446	PCSK5,SERPINF1,TMEM176A,F3,FABP1,MEP1A,S100A6,SERPINA1,SH3RF2,FGB,PLG,SERPINF2,VTN,TMEM176B,CXCL14,APOA1,APOA2,APOA4,CDCP1,TXNIP,SLC9A3,PLPP3,RHPN2,FRZB,TMEM37,IGSF1,IL6R,MASP1,GCNT1,ITIH2,GIPR,SULT1A1,PTPRH,LINC02381,NPNT,DPP4,TF,GREM2,TGFBR3,PLLP,EFNA1,SLC16A3,PCSK6,LRRC1,SERPINB1,ELF3
Coexpression	M9197	ELVIDGE_HYPOXIA_BY_DMOG_UP	C2:CGP: Chemical and Genetic Perturbations	7.44e-14	7.15e-10	9.93e-12	9.69e-11	23	133	HK2,PFKP,PLAC8,S100A6,NDRG1,AK4,PLAUR,VEGFA,ANG,ERO1A,BHLHE40,TXNIP,ATF3,MXI1,ISG20,P4HA2,EGLN3,STBD1,SRD5A3,RNASE4,P4HA1,PAM,ELF3
Coexpression Atlas	Arv_SC_fibroblast_2500_K2	AravindRamakr_StemCell_from_inducedPluripotentialStemCells_derived from_from_fibroblast_top-relative-expression-ranked_2500_k-means-cluster#2	PCBC	7.52e-14	3.06e-10	2.03e-12	1.8e-11	79	1108	ERBB3,SYN3,RIMKLA,ENPP1,WIPF3,B3GALT5,CYP2S1,ZBED10P,FOXA3,HNF4G,FABP1,HOOK1,MUC17,HPN,CGN,SCNN1A,UGT8,ALDOB,RBM47,PLS1,LRRC75A,BAIAP2L2,ALPI,ALPG,VIL1,VIPR1,CAMSAP3,TMEM253,APOA4,CLDN3,MUC13,LSR,C1orf226,SLC15A1,RHPN2,TMEM37,IGSF1,OCLN,MUC3A,MUC4,TJP3,MYO1A,CDHR2,KIF12,GDPD2,CDHR5,STEAP2,NELL2,NR1I2,TMEM92,FZD5,COBL,MARVELD3,EPS8L3,B4GALNT3,CREB3L3,DMBT1,PHGR1,TRIM15,INHBE,SLC26A3,RAB17,CECR2,SL…
Coexpression Atlas	gudmap_kidney_adult_RenalCortexMixed_Std_200	kidney_adult_RenalCortexMixed_Std_top-relative-expression-ranked_200	Gudmap Mouse MOE430.2	9.7e-14	3.95e-10	2.6e-12	2.31e-11	27	159	EPHX2,HGD,SQOR,MEP1A,UGT8,AK4,ABCC2,ALDOB,SLC3A1,SLC51B,FXYD2,PECR,GCNT1,TINAG,CLRN3,CALML4,CA2,SLC27A2,TMT1B,GPX3,SLC19A3,PAPSS2,ACE2,SLC16A4,LACTB2,TSPAN8,CDA
Coexpression	MM457	LAZARO_GENETIC_MOUSE_MODEL_HIGH_GRADE_SMALL_CELL_NEUROENDOCRINE_LUNG_CARCINOMA_DN	M2:CGP: Chemical and Genetic Perturbations	1.13e-13	1.08e-09	1.48e-11	1.45e-10	95	1809	TMEM144,HLA-DMA,MGAT4A,TMEM176A,MGLL,ACVRL1,KLF4,PLAC8,FABP1,CLIC5,SH3RF2,CCL5,PLAUR,SMPD3,RBM47,VEGFA,VIPR1,VIPR2,CORO2A,SGPP2,PAQR8,HKDC1,CXCL14,XPNPEP2,CPT1A,TDP2,IFNGR1,AATK,FAR2,SLC15A1,CADPS,SLCO2A1,CTNNA1,RNF39,IL2RG,SORL1,ABCC3,PAG1,NAAA,MYO1D,TNFSF10,CYP27A1,SRI,GBP3,ITGB2,GDNF,RNF43,ELOVL2,TMBIM1,SLC36A2,TINAG,SULT1A1,FZD5,SEMA3B,DIAPH1,DIAPH2,TMEM163,TACC1,MVP,CA2,NPNT,NDNF,DPP4,TCF7L2…
GO: Biological Process	GO:0044255	cellular lipid metabolic process		1.32e-13	8.89e-10	1.48e-10	1.39e-09	80	1134	HEXB,EPHX2,CEACAM5,ABO,ENPP1,ENPP2,CEACAM7,MGLL,CYP2S1,ST6GALNAC6,HNF4A,TTR,FABP1,PIK3CB,SCD,AGT,UGT8,SMPD3,DEGS2,ALOX15B,ANG,MOGAT2,PRXL2B,FA2H,AOAH,AGPAT2,SGPP2,ISX,APOA1,APOA2,APOA4,APOB,FADS6,PPARA,CPT1A,LPIN3,TRIB3,PLPP3,CIDEC,MTTP,PRKCD,FUT2,MOGAT3,IPMK,DGAT1,ACSL5,SORL1,CIDEB,PECR,CYP2B6,NAAA,CYP3A5,INSIG1,NAGA,ABHD3,CEACAM6,ACSS2,RETSAT,APOBR,ELOVL2,GGT1,ITPKA,CEACAM1,CHPT1,LPGAT1,SLC27A2…
Coexpression	M45034	CARRILLOREIXACH_HEPATOBLASTOMA_VS_NORMAL_DN	C2:CGP: Chemical and Genetic Perturbations	1.39e-13	1.34e-09	1.81e-11	1.76e-10	75	1259	EPHX2,TMEM176A,MGLL,SQOR,TTR,LRG1,PLAC8,SIAE,SEMA6D,SCNN1A,ABCG2,SLC51A,ALDOB,RBM47,OSGIN1,VIPR1,ANG,TMEM176B,MOGAT2,AGPAT2,CXCL14,CP,FADS6,SLC1A1,SLC3A1,ZFYVE28,GDA,TRIB3,PLPP3,ASL,MUC3A,ABCC3,CYP2B6,PRSS8,NAAA,INSIG1,IRF1,IRF7,BCKDHB,GCHFR,RILP,RETSAT,PTPN3,NR1I2,TMEM92,SULT1A1,CLRN3,COBL,TTC22,CA2,SLC27A2,TRIM15,INHBE,RAB17,RCAN1,ARRDC4,CECR2,TMT1B,MAP7,PAPSS2,SYT7,PNPO,SGK2,GREM2,RSPO3,SLC22A…
Coexpression	M17923	BOQUEST_STEM_CELL_CULTURED_VS_FRESH_UP	C2:CGP: Chemical and Genetic Perturbations	1.42e-13	1.37e-09	1.82e-11	1.78e-10	40	428	SERPINF1,TMEM176A,KLF4,ME1,MTUS1,SELENOP,ANG,BHLHE40,SLC1A1,ZFP36,HAPLN1,TXNIP,TRIB3,FRZB,ATF3,CTSS,IL6R,ACSL5,TNFSF10,ERAP1,TMEM135,FAXDC2,IRF1,ELOVL2,BMP2,NELL2,NQO1,KIF13B,GPX3,NR1H3,PAPSS2,TNFRSF11B,GREM2,TGFBR3,RNASE4,SLC16A3,LMO7,CLMN,TSPAN8,RORA
Coexpression Atlas	GSM777037_500	Stromal Cells, BEC.SLN, gp38- CD31+, Lymph Node, avg-4	Immgen.org, GSE15907	1.97e-13	8.02e-10	5.24e-12	4.66e-11	46	459	TSPAN15,SLCO2B1,ENPP2,TMEM176A,MGLL,ATP8B1,ACVRL1,KLF4,ME1,FAM3D,LRG1,SERPINA1,NDRG1,CLIC5,SEMA6D,PLCB4,ABCG2,TMEM176B,UBD,BHLHE40,ZFP36,GDA,PLPP3,SLCO2A1,PCP4L1,ATF3,MYO6,TNFSF10,RAPGEF5,CFB,CEACAM1,SULT1A1,RCAN1,ARRDC4,PAPSS2,TGFBR3,C1orf115,EFNA1,SUSD2,KIAA1217,SCARB1,SERPINB1,PAM,CD151,NOSTRIN,TM4SF1
Coexpression Atlas	Arv_SC_fibroblast_500_K3	AravindRamakr_StemCell_from_inducedPluripotentialStemCells_derived from_from_fibroblast_top-relative-expression-ranked_500_k-means-cluster#3	PCBC	2.08e-13	8.47e-10	5.5e-12	4.89e-11	25	139	CDX2,CEACAM5,CEACAM7,FAM3D,FABP1,MEP1A,SERPINA1,FXYD3,ALDOB,TMEM253,APOA4,MUC13,MISP,C15orf48,MYO1A,CDHR5,EPS8L3,DMBT1,PHGR1,SLC39A5,SLC26A3,LGALS4,TFF3,TSPAN8,CDH17
GO: Molecular Function	GO:0008514	organic anion transmembrane transporter activity		2.3e-13	3.39e-10	3.39e-10	2.67e-09	35	266	CEACAM5,SLCO2B1,CEACAM7,ABCG2,ABCC2,SLC51A,SLC39A4,SLC1A1,SLC3A1,SLC51B,SLC6A8,SLC15A1,SLC17A9,SLCO2A1,ABCC3,SLC36A1,CEACAM6,SLC46A1,SLC36A2,CEACAM1,SLC39A5,SLC38A3,SLC27A2,SLC26A3,SLC26A2,SLC19A3,SLC44A4,SFXN1,SLC25A22,SLC22A18,SLC35A3,SLC16A4,SLC16A3,SLC39A14,SLC6A14
Coexpression Atlas	gudmap_developingLowerUrinaryTract_e13.5_bladder epithelial cells_1000_k1	DevelopingLowerUrinaryTract_e13.5_bladder epithelial cells_emap-30875_k-means-cluster#1_top-relative-expression-ranked_1000	Gudmap Mouse MOE430.2	3.36e-13	1.37e-09	8.81e-12	7.83e-11	33	251	ERBB3,LDOC1,HOXD1,HOOK1,PIK3CB,UGT8,AK4,PLS1,RNF186,CAMSAP3,SLC39A4,CLDN7,SEMA4G,CCDC68,RASEF,ATF3,OCLN,ANO9,ABHD3,RNF43,KLF5,RAB3B,CA2,SLC27A2,TRIM2,GPR35,TFRC,EFNA1,CLMN,LRRC1,PAK1,EPCAM,CDH17
Coexpression Atlas	GSM605878_500	Myeloid Cells, Mo.6C-II+.Bl, CD115+ B220- CD43+ Ly6C- MHCIIhi, Blood, avg-2	Immgen.org, GSE15907	3.39e-13	1.38e-09	8.81e-12	7.83e-11	43	413	HK2,HLA-DMA,TMEM176A,KLF4,SQOR,PLAC8,CKB,S100A6,MTUS1,FCGRT,PLAUR,RBM47,TMEM176B,LSR,GDA,PRKCD,ATF3,CTSS,IL6R,NAAA,CYP27A1,IRF7,PTAFR,CEACAM1,PTPRJ,TMEM150B,KCNE3,ADAP1,ARRDC4,GPR35,OAS3,CXCL16,TF,LGALS3,CD7,SLC16A3,RASA4,SCARB1,PAK1,CD68,NOSTRIN,PADI2,STOM
Coexpression Atlas	gudmap_developingLowerUrinaryTract_adult_bladder_1000	DevelopingLowerUrinaryTract_adult_bladder_emap-29457_top-relative-expression-ranked_1000	Gudmap Mouse MOE430.2	3.4e-13	1.38e-09	8.81e-12	7.83e-11	60	734	RGMB,GCNT3,SLCO2B1,ENPP1,TLCD4,MGAT4A,MGLL,ATP8B1,PFKP,ME1,SQOR,FAM3D,TTR,POF1B,PLEKHH1,S100A6,CLIC5,SCD,PLCB4,FBXO32,DEGS2,FXYD3,RBM47,ANG,FA2H,ANXA4,CXCL14,CP,TMC4,GDA,TMEM45B,RAB11FIP5,RASEF,SORL1,TTC39B,ABCC3,PAQR5,ATP10B,ISG20,CFB,BMP2,NQO1,DIAPH2,TACC1,MARVELD3,CPEB2,DPEP1,RBP4,TPPP,TF,LGALS3,GREM2,SLC44A1,RASSF6,SH3D19,ENTPD5,TSPAN8,TMPRSS2,RORA,TM4SF1
Coexpression Atlas	gudmap_kidney_adult_RenalCortexMixed_Std_k4_500	kidney_adult_RenalCortexMixed_Std_k-means-cluster#4_top-relative-expression-ranked_500	Gudmap Mouse MOE430.2	3.45e-13	1.4e-09	8.88e-12	7.9e-11	25	142	ENPP2,NDRG1,SCNN1A,ABCC2,ALDOB,RBM47,SELENOP,AOAH,ATP1B1,FXYD2,PECR,GALNT3,ABHD3,GATM,CDHR5,GCNT1,GGT1,CA2,SLC27A2,TCN2,GPX3,LACTB2,ENTPD5,TMPRSS2,CDH16
Coexpression Atlas	GSM538280_500	Myeloid Cells, DC.LC.Sk, MHCII+ CD11b+ CD45+, Skin, avg-2	Immgen.org, GSE15907	4.25e-13	1.73e-09	1.09e-11	9.68e-11	45	451	HK2,HLA-DMA,MGLL,ATP8B1,KLF4,POF1B,S100A6,NDRG1,SEMA6D,SCD,PLAUR,VEGFA,ANPEP,ANXA4,CDCP1,ZFP36,LSR,TMEM45B,ATF3,CTNNA1,OCLN,CTSS,MYO6,INSIG1,NAGA,GDPD2,ITGB4,TMBIM1,SLC36A2,BMP2,SULT1A1,SLC27A2,RCAN1,ARRDC4,LAMC2,CXCL16,GLB1L2,LGALS3,EFNA1,TSPAN8,PAK1,CD68,HSD17B11,EPCAM,SLC6A14
Coexpression	M6189	ELVIDGE_HIF1A_AND_HIF2A_TARGETS_DN	C2:CGP: Chemical and Genetic Perturbations	4.79e-13	4.61e-09	6.07e-11	5.92e-10	20	105	HK2,PLAC8,NDRG1,AK4,PLAUR,VEGFA,ANG,ERO1A,BHLHE40,MXI1,P4HA2,EGLN3,DPYSL2,STBD1,SRD5A3,NOL3,RNASE4,P4HA1,RASA4,PAM
Coexpression Atlas	Arv_SC-HD_500	AravindRamakr_StemCell-HD_top-relative-expression-ranked_500	PCBC	4.93e-13	2e-09	1.25e-11	1.11e-10	47	489	CDX2,CEACAM5,SYN3,RIMKLA,CEACAM7,CYP2S1,FOXA3,FAM3D,FABP1,MEP1A,SERPINA1,SCNN1A,FXYD3,ALDOB,VIL1,TMEM176B,TMEM253,APOA4,CLDN3,MUC13,MISP,C15orf48,IGSF1,MUC3A,TJP3,PRSS8,MYO1A,GDPD2,CDHR5,COBL,MARVELD3,EPS8L3,DMBT1,PHGR1,SLC39A5,INHBE,SLC26A3,RAB17,B3GNT7,MAP7,USH1C,LGALS4,TFF3,ACE2,TSPAN8,TMPRSS2,CDH17
Coexpression Atlas	Arv_SC_fibroblast_500	AravindRamakr_StemCell_from_inducedPluripotentialStemCells_derived from_from_fibroblast_top-relative-expression-ranked_500	PCBC	4.93e-13	2e-09	1.25e-11	1.11e-10	47	489	CDX2,CEACAM5,SYN3,RIMKLA,CEACAM7,CYP2S1,FOXA3,FAM3D,FABP1,MEP1A,SERPINA1,SCNN1A,FXYD3,ALDOB,VIL1,TMEM176B,TMEM253,APOA4,CLDN3,MUC13,MISP,C15orf48,IGSF1,MUC3A,TJP3,PRSS8,MYO1A,GDPD2,CDHR5,COBL,MARVELD3,EPS8L3,DMBT1,PHGR1,SLC39A5,INHBE,SLC26A3,RAB17,B3GNT7,MAP7,USH1C,LGALS4,TFF3,ACE2,TSPAN8,TMPRSS2,CDH17
Coexpression Atlas	gudmap_developingKidney_e15.5_Proximal Tubules_500_k1	DevelopingKidney_e15.5_Proximal Tubules_emap-28005_k-means-cluster#1_top-relative-expression-ranked_500	Gudmap Mouse MOE430.2	4.98e-13	2.03e-09	1.25e-11	1.11e-10	21	98	CHDH,MEP1A,AFP,HPN,ABCC2,SERPINF2,SLC1A1,SLC3A1,TMEM45B,CCDC68,FXYD2,PRSS8,PAQR5,CFB,APOM,TINAG,CALML4,DPEP1,AMN,TMT1B,SUSD2
Coexpression	M15267	FUJII_YBX1_TARGETS_UP	C2:CGP: Chemical and Genetic Perturbations	5.68e-13	5.47e-09	7.1e-11	6.92e-10	14	43	POF1B,S100A6,SEMA6D,CCL5,SELENOP,MUC1,CFB,CEACAM1,CDC42SE2,DIAPH2,MVP,LGALS9,SLC16A3,PAM
Coexpression Atlas	gudmap_kidney_adult_RenCorpuscGlomer_500	kidney_adult_RenCorpuscGlomer_top-relative-expression-ranked_500	Gudmap Mouse MOE430.2	6.19e-13	2.52e-09	1.55e-11	1.37e-10	44	438	TSPAN15,MGAT4A,MGLL,ATP8B1,SQOR,PLAC8,S100A6,SERPINA1,CLIC5,SCD,VEGFA,SELENOP,ANXA4,CP,IFNGR1,TXNIP,PLPP3,SLCO2A1,IL2RG,CTSS,TTC39B,MYO1D,IQGAP2,MYO6,TNFSF10,ERAP1,TMBIM1,CEACAM1,PTPRJ,CALML4,RAB3B,SLC27A2,NPNT,DPP4,GPX3,GLB1L2,LGALS9,P2RX4,LMO7,TSPAN8,PAK1,SERPINB1,NOSTRIN,TM4SF1
GO: Molecular Function	GO:0005319	lipid transporter activity		6.64e-13	9.8e-10	4.9e-10	3.86e-09	30	204	CEACAM5,SLCO2B1,CEACAM7,ATP8B1,FABP1,PRELID2,NPC1L1,OSBPL9,SLC51A,GLTPD2,APOA1,APOA2,APOA4,APOB,SLC51B,SLCO2A1,CIDEC,MTTP,CIDEB,ABCC3,ANO9,CEACAM6,ATP10B,CEACAM1,APOM,ATP11A,SLC27A2,RBP4,ATP10A,SCARB1
Coexpression Atlas	DevelopingKidney_e15.5_Medullary collecting duct_emap-28063_100	DevelopingKidney_e15.5_Medullary collecting duct_emap-28063_top-relative-expression-ranked_100	Gudmap Mouse MOE430.2	7.05e-13	2.87e-09	1.75e-11	1.56e-10	19	79	POF1B,TFCP2L1,HOXD1,UGT8,FXYD3,RBM47,SGPP2,CLDN3,CLDN7,TMEM45B,MUC1,PRDM16,KIF12,RAB17,GLB1L2,LGALS3,TSPAN8,TMPRSS2,CDH16
Coexpression Atlas	gudmap_developingKidney_e11.5_ureteric bud_1000_k3	DevelopingKidney_e11.5_ureteric bud_emap-3844_k-means-cluster#3_top-relative-expression-ranked_1000	Gudmap Mouse MOE430.2	7.48e-13	3.05e-09	1.85e-11	1.64e-10	22	111	GCNT3,F3,PLAC8,TFCP2L1,CGN,UGT8,SGPP2,HKDC1,TMC4,CLDN7,RHPN2,OCLN,MUC1,PRDM16,TJP3,NPNT,RAB17,GALNT12,GLB1L2,TMPRSS2,EPCAM,CDH16
Coexpression	M41202	HARALAMBIEVA_PBMC_M_M_R_II_AGE_11_22YO_VACCINATED_VS_UNVACCINATED_7YR_DN	C7:VAX: HIPC Vaccine Response	7.79e-13	7.5e-09	9.61e-11	9.37e-10	53	741	ERBB3,TMEM144,AOC1,HLA-DMA,HLA-DMB,SLCO2B1,ME1,DSCAML1,TFCP2L1,FCGRT,SCNN1A,QPCT,HRH2,MMP7,CXCL5,VIPR1,SELENOP,PRXL2B,CLDN7,COL23A1,IFNGR1,AATK,BRI3BP,TMEM45B,CCDC68,SORL1,ABCC3,CDHR2,CYP27A1,NOXA1,GATM,FAXDC2,SLC46A1,ITGB2,BMP2,SULT1B1,TRIM2,SRD5A3,GPX3,PAPSS2,LGALS3,TFRC,CRYL1,PLLP,GUCY2C,CLMN,RASA4,SCARB1,PCSK6,CDA,PC,PADI2,PCDH1
Coexpression Atlas	gudmap_developingKidney_e15.5_ureter tip_500_flank cortic collct	DevelopingKidney_e15.5_ureter tip_flank cortic collct_emap-27752_top-relative-expression-ranked_500	Gudmap Mouse MOE430.2	7.98e-13	3.25e-09	1.96e-11	1.74e-10	42	406	GCNT3,CHDH,MGAT4A,PLAC8,S100A6,ADORA1,TFCP2L1,HOXD1,HOOK1,AFP,HPN,UGT8,RBM47,VEGFA,RNF186,SGPP2,HKDC1,CXCL14,APOA1,CLDN3,CLDN7,CDCP1,TMEM45B,OCLN,MUC1,PRDM16,SORL1,PRSS8,GALNT3,KIF12,RNF43,PTPN3,MARVELD3,SLC27A2,NPNT,WSCD1,DPP4,GLB1L2,TFRC,TMPRSS2,EPCAM,CDH16
Coexpression Atlas	Arv_SC-H9hpx_1000_K4	AravindRamakr_StemCell-H9hpx_top-relative-expression-ranked_1000_k-means-cluster#4	PCBC	8.25e-13	3.36e-09	2.01e-11	1.79e-10	32	244	CDX2,AOC1,CEACAM7,FABP1,MEP1A,SERPINA1,MUC17,ALDOB,ALPI,PRR15L,APOA1,APOA4,MUC13,MTTP,MYO1A,CYP3A5,CDHR2,CDHR5,EPS8L3,CREB3L3,DMBT1,PHGR1,SLC39A5,DPEP1,TRIM15,SLC26A3,TRIM31,LGALS4,TFF3,TSPAN8,GPA33,CDH17
Coexpression Atlas	gudmap_kidney_P4_CapMesRenVes_Crym_k3_1000	kidney_P4_CapMesRenVes_Crym_k-means-cluster#3_top-relative-expression-ranked_1000	Gudmap Mouse MOE430.2	9.1e-13	3.7e-09	2.2e-11	1.96e-10	25	148	ENPP2,TUBA4A,MEP1A,TFCP2L1,HOOK1,RBM47,PLS1,SGPP2,TMEM37,OCLN,PRDM16,PRSS8,KIF12,GCNT1,ANKS4B,STEAP2,GGT1,PTPN3,CA12,MAP7,PAPSS2,TSPAN8,TMPRSS2,EPCAM,CDH16
Coexpression	M7577	ACEVEDO_LIVER_CANCER_DN	C2:CGP: Chemical and Genetic Perturbations	9.97e-13	9.59e-09	1.21e-10	1.18e-09	44	540	EPHX2,SERPINF1,TTR,HOOK1,SCD,AGT,PLG,SERPINF2,ALDOB,VTN,ANPEP,AGPAT2,APOA1,APOA2,APOB,CLDN3,XPNPEP2,BHLHE40,ZFP36,IGF2,TRIB3,DGAT1,GATM,IRF1,RETSAT,ITIH2,GJB1,DIAPH1,ESPN,KIF13B,INHBE,TMPRSS6,SLC19A3,CXCL16,MAP7,TFF3,SFXN1,ORM1,C1orf115,ENTPD5,ALKBH3,CDA,SLC39A14,SERPINA5
Coexpression Atlas	gudmap_dev gonad_e13.5_M_SertoliCell_Sox9_1000	dev gonad_e13.5_M_SertoliCell_Sox9_top-relative-expression-ranked_1000	Gudmap Mouse ST 1.0	1.09e-12	4.45e-09	2.64e-11	2.34e-10	66	880	TSPAN15,ERBB3,HK2,WIPF3,ME1,F3,ADORA1,SIAE,CLCN2,MTA3,HOOK1,HPCAL1,SCD,CGN,PLOD2,USP53,ERO1A,ANXA4,DHRS11,CAMSAP3,CP,VSIG10,SLC6A8,LSR,CADPS,FRZB,C15orf48,PRKCD,ATP1A1,ATP1B1,MXI1,MASP1,NAAA,IQGAP2,ERAP1,ARHGAP26,ABHD3,GATM,GCNT1,ACSS2,GDNF,CDC42SE2,DIAPH2,TACC1,RAB3B,ESPN,CPEB2,RCAN1,TCN2,MAP7,PAPSS2,GREM2,CRYL1,P2RX4,SLC16A4,P4HA1,KIAA1217,SH3D19,SCARB1,PCSK6,LRRC1,ENTPD5,SERPINB1,CD151,PADI2,S…
Coexpression	M14791	SABATES_COLORECTAL_ADENOMA_DN	C2:CGP: Chemical and Genetic Perturbations	1.1e-12	1.06e-08	1.33e-10	1.29e-09	32	299	CEACAM7,B3GALT5,TTR,SEMA6D,PCDH19,CCL5,ABCG2,SLC51A,ALPI,ANPEP,DHRS11,CP,XPNPEP2,HAPLN1,SLC51B,MST1,SLC9A3,SLC15A1,IL6R,PAG1,GDPD2,CDHR5,RAB3B,CA2,WSCD1,SLC26A2,GPX3,SLC17A4,GREM2,RSPO3,USP2,CDA
Transcription Factor Binding Site	V$HNF1_C	V$HNF1_C	TFBS	1.17e-12	1.18e-09	4.52e-10	3.39e-09	25	192	F2,HAVCR1,SERPINA4,HOXC6,AFP,CGN,FGB,SLC1A1,SEMA4G,LRRC19,MXI1,APOM,GJB1,TINAG,HNF1A,SLC26A3,RBP4,SGK2,RNASE4,ARHGAP12,RORA,SLC39A14,CDH16,CDH17,LRRFIP2
Coexpression	M40139	DESCARTES_MAIN_FETAL_MUC13_DMBT1_POSITIVE_CELLS	C8: Cell Type Signature	1.2e-12	1.15e-08	1.42e-10	1.39e-09	20	110	CEACAM5,POF1B,FER1L6,PLS1,AGPAT2,PRR15L,SLC3A1,GDA,LRRC19,RHPN2,OCLN,SDCBP2,MUC3A,DMBT1,SLC19A3,TRIM31,TSPAN8,EPCAM,GPA33,MXD1
Coexpression Atlas	GSM605839_500	Myeloid Cells, DC.8-4-11b-.Sp, CD11b-FITC CD4-PE CD11c-eFluor780 CD8a-eFluor450 C, Spleen, avg-1	Immgen.org, GSE15907	1.3e-12	5.29e-09	3.11e-11	2.77e-10	42	412	HLA-DMA,TMEM176A,CKB,S100A6,PIK3CB,CCL5,RBM47,TMEM176B,ANPEP,FLVCR1,CDCP1,BHLHE40,ZFP36,ATF3,CTNNA1,CTSS,IL6R,NAAA,CYP27A1,NAGA,GATM,PTAFR,BMP2,PTPN3,TMEM150B,DPP4,ADAP1,ARRDC4,GPR35,CXCL16,LGALS3,TFRC,SLC44A1,CD7,RASA4,GUSB,SCARB1,PAK1,CD68,NOSTRIN,CDH17,STOM
Coexpression Atlas	gudmap_developingLowerUrinaryTract_e15.5_ureteral tissue_200_k3	DevelopingLowerUrinaryTract_e15.5_ureteral tissue_emap-8234_k-means-cluster#3_top-relative-expression-ranked_200	Gudmap Mouse MOE430.2	1.32e-12	5.38e-09	3.13e-11	2.78e-10	22	114	FOXA3,F2,HNF4A,TTR,FABP1,SERPINA1,AFP,FGB,PLG,SERPINF2,ALDOB,VTN,APOA1,APOB,ISG20,ITIH2,APOM,CA2,SLC27A2,RBP4,TF,PNPO
Coexpression Atlas	PCBC_EB_blastocyst_1000	Progenitor-Cell-Biology-Consortium_EmbryoidBody_fromBlastocyst-derived-humanEmbryonicStemCells_top-relative-expression-ranked_1000	PCBC	1.32e-12	5.38e-09	3.13e-11	2.78e-10	71	992	CDX2,ABO,SLCO2B1,TMEM176A,F2,HNF4A,TTR,FABP1,MEP1A,TMEM132C,HAVCR1,SERPINA1,HOXC6,SH3RF2,AFP,PCDH19,AGT,FGB,PLG,ALDOB,GLTPD2,VIL1,SELENOP,VTN,TMEM176B,UBD,CXCL14,APOA1,APOA2,POU4F1,APOA4,APOB,CLDN3,SLC3A1,HAPLN1,IGF2,FRZB,MTTP,URAD,TJP3,KIF12,GDNF,ELOVL2,ITIH2,HAGLR,APOM,IGSF10,GJB1,NELL2,LCN15,SLC39A5,GNRH2,NPNT,NDNF,DPEP1,DPP4,INHBE,SLC26A3,RBP4,SLC19A3,USH1C,TF,NSUN7,GREM2,ORM1,ABCC6P1,EFNA2,T…
Transcription Factor Binding Site	V$HNF1_Q6	V$HNF1_Q6	TFBS	1.35e-12	1.36e-09	4.52e-10	3.39e-09	26	210	F2,HNF4A,SERPINA4,HOXC6,AFP,HPN,FGB,PLAG1,PLG,RBM47,ANPEP,SEMA4G,FXYD2,APOM,GJB1,TINAG,SLC39A5,HNF1A,SGK2,RNASE4,TM4SF4,RORA,SLC39A14,CDH16,CDH17,LRRFIP2
Coexpression	M14877	BASAKI_YBX1_TARGETS_DN	C2:CGP: Chemical and Genetic Perturbations	1.4e-12	1.34e-08	1.64e-10	1.6e-09	37	398	HGD,HK2,HLA-DMA,MGAT4A,CKB,SERPINA1,CAMK2N1,NDRG1,SCD,AK4,MMP7,RBM47,PLOD2,VEGFA,SEMA4B,SELENOP,BHLHE40,SLC1A1,SLC3A1,TMEM37,MUC1,CXADR,MXI1,GALNT3,TNFSF10,ISG20,TNFRSF11A,CA12,DPP4,PAPSS2,SGK2,SLC22A18,SLC44A1,P4HA1,PCSK6,TM4SF4,SERPINB1
Coexpression Atlas	gudmap_developingKidney_e14.5 whole kidney - wildtype_emap-6674_200	DevelopingKidney_e14.5 whole kidney - wildtype_emap-6674_top-relative-expression-ranked_200	Gudmap Mouse MOE430.2	1.45e-12	5.9e-09	3.39e-11	3.01e-10	25	151	PFKP,HNF4A,MEP1A,CLIC5,AFP,ALDOB,RBM47,VIL1,ANG,UNC5CL,ATP1B1,FXYD2,CIDEB,GGT1,TINAG,CLRN3,CALML4,SLC39A5,NPNT,NDNF,DPP4,AMN,PAPSS2,ACE2,LACTB2
Coexpression Atlas	gudmap_developingLowerUrinaryTract_e15.5_Urothelium_500_k5	DevelopingLowerUrinaryTract_e15.5_Urothelium_emap-28091_k-means-cluster#5_top-relative-expression-ranked_500	Gudmap Mouse MOE430.2	1.45e-12	5.91e-09	3.39e-11	3.01e-10	19	82	MGAT4A,ATP8B1,FAM3D,POF1B,PLEKHH1,CLDN3,CDCP1,TMEM45B,RHPN2,SLCO2A1,PRDM16,ABCC3,GALNT3,ATP10B,RAB17,LGALS3,TSPAN8,TMPRSS2,PRR15
Coexpression Atlas	gudmap_developingKidney_e15.5_ureter tip_1000_flank cortic collct	DevelopingKidney_e15.5_ureter tip_flank cortic collct_emap-27752_top-relative-expression-ranked_1000	Gudmap Mouse MOE430.2	1.46e-12	5.93e-09	3.39e-11	3.01e-10	62	801	RGMB,ERBB3,GCNT3,TLCD4,CHDH,MGAT4A,ATP8B1,TTR,PLAC8,S100A6,ADORA1,TFCP2L1,HOXD1,HOOK1,AFP,HPN,UGT8,ALDOB,RBM47,VEGFA,RNF186,SGPP2,HKDC1,CXCL14,APOA1,TMC4,CLDN3,CLDN7,CDCP1,TMEM45B,OCLN,MUC1,PRDM16,SORL1,TJP3,PRSS8,GALNT3,IQGAP2,KIF12,GDNF,RNF43,GGT1,PTPN3,CHPT1,MARVELD3,SLC27A2,NPNT,WSCD1,DPP4,RAB17,GALNT12,LAMC2,GLB1L2,MAP7,LGALS3,TFF3,TFRC,SLC35A3,TMPRSS2,EPCAM,CDH4,CDH16
Coexpression Atlas	gudmap_developingKidney_e15.5_ureter tip_flank cortic collct_1000_k3	DevelopingKidney_e15.5_ureter tip_flank cortic collct_emap-27752_k-means-cluster#3_top-relative-expression-ranked_1000	Gudmap Mouse MOE430.2	1.51e-12	6.14e-09	3.49e-11	3.1e-10	17	63	CHDH,TTR,AFP,HPN,ALDOB,RBM47,APOA1,TMEM45B,PRSS8,GALNT3,KIF12,GGT1,CHPT1,SLC27A2,DPP4,MAP7,TFF3
Coexpression	M39037	FAN_EMBRYONIC_CTX_OLIG	C8: Cell Type Signature	1.53e-12	1.47e-08	1.75e-10	1.71e-09	53	754	TSPAN15,ERBB3,TMEM144,ENPP2,PLEKHH1,NDRG1,HOXD1,MTUS1,SCD,UGT8,FBXO32,FLNB,FA2H,SH3KBP1,IFNGR1,ZFYVE28,AATK,PRKCSH,CTNNA1,ATP1B1,MYO1D,RAPGEF5,FAXDC2,ATP10B,TMBIM1,HAGLR,GJB1,LPGAT1,COBL,CA2,KIF13B,EGLN3,ADAP1,TRIM2,SRD5A3,RCAN1,TPPP,MAP7,TF,RGS3,SGK2,RNF220,PLLP,SLC44A1,LACTB2,INF2,CLMN,SCARB1,PCSK6,PAK1,ZFYVE19,ARHGEF2,PADI2
Coexpression	M39039	FAN_EMBRYONIC_CTX_BRAIN_ENDOTHELIAL_1	C8: Cell Type Signature	1.53e-12	1.47e-08	1.75e-10	1.71e-09	39	440	ACVRL1,KLF4,MYORG,CLIC5,HPCAL1,QPCT,PLCB4,DEGS2,FLNB,PRXL2B,BHLHE40,LSR,TMEM45B,DOK4,SLCO2A1,OCLN,DGAT1,MYO6,RAPGEF5,SPOCK2,ITPR3,NQO1,SLC38A3,CA2,DPEP1,TCN2,ATP10A,RGS3,TFRC,ABLIM1,PLLP,C1orf115,EFNA1,SCARB1,PAM,CD151,CDA,NOSTRIN,TM4SF1
Coexpression	MM987	MCBRYAN_PUBERTAL_BREAST_4_5WK_UP	M2:CGP: Chemical and Genetic Perturbations	1.63e-12	1.57e-08	1.84e-10	1.8e-09	31	285	ERBB3,CEACAM5,TLCD4,CEACAM7,F3,TUBA4A,POF1B,PLAC8,FBXO32,FXYD3,EPB41L4B,CXCL14,CLDN3,CLDN7,CPT1A,CDCP1,SLCO2A1,ATP1A1,OCLN,FXYD2,ABCC3,GALNT3,CEACAM6,CEACAM1,KLF5,RAB25,RAB17,TSPAN8,TMPRSS2,EPCAM,PADI2
Coexpression Atlas	PCBC_ratio_MESO-5_vs_ECTO_cfr-2X-p05	Mesoderm Day 5_vs_Ectoderm Differentiated Cells-Confounder_removed-fold2.0_adjp0.05	PCBC_AltAnalyze	1.65e-12	6.7e-09	3.79e-11	3.36e-10	66	888	ERBB3,FOXA3,HNF4A,F3,TUBA4A,MYORG,SEMA6D,QPCT,AK4,PLOD2,VEGFA,USP53,VIL1,FLNB,SELENOP,CORO2A,AGPAT2,CAMSAP3,APOA1,APOA2,CLDN7,VSIG10,BHLHE40,SLC1A1,COL23A1,LSR,FAR2,TRIB3,SLCO2A1,ASL,FRZB,CAPN12,TTC39B,PRSS8,MYO1D,CYP27A1,TMEM135,ABHD3,PAQR5,GCHFR,ELOVL2,TMBIM1,GGT1,ITPR3,BMP2,TMEM92,FZD5,KLF5,LPGAT1,B4GALNT3,RAB25,RAB17,GPX3,TNFRSF11B,TFRC,GREM2,USP2,PLLP,SLC35A3,SLC44A1,SLC16A3,INF2,TMPRSS2,SLC…
Coexpression	M1920	CHEN_METABOLIC_SYNDROM_NETWORK	C2:CGP: Chemical and Genetic Perturbations	1.66e-12	1.6e-08	1.86e-10	1.81e-09	72	1242	HEXB,TMEM144,HK2,HLA-DMB,SLCO2B1,PFKP,ACVRL1,PLAC8,S100A6,MELTF,SERPINA1,SEMA6D,HPCAL1,SCD,PRR13,SCNN1A,PLAUR,FBXO32,TMEM164,VTN,ANG,ANPEP,UBD,ANXA4,CXCL14,IFNGR1,SLC6A8,SLCO2A1,ASL,CIDEC,FRZB,RAB11FIP5,PRKCD,ATF3,C11orf86,SDCBP2,CTSS,PECR,GALNT3,IQGAP2,GATM,PBLD,GCNT1,ITGB2,HEPH,ITPR3,BMP8B,GJB1,MTMR11,FZD5,SEMA3B,NQO1,CA2,KCNE3,SLC11A2,SRD5A3,LAMA2,CXCL16,KLC4,PTPN18,ATP13A2,LGALS3,P2RX4,RASA4,…
Coexpression	MM1001	SCHAEFFER_PROSTATE_DEVELOPMENT_48HR_UP	M2:CGP: Chemical and Genetic Perturbations	2.44e-12	2.35e-08	2.7e-10	2.63e-09	41	489	EPHX2,CEACAM5,AOC1,CEACAM7,PLAC8,TFCP2L1,SCNN1A,MMP7,FXYD3,CORO2A,HKDC1,TMC4,SLCO2A1,TMEM37,ATP1A1,MASP1,CEACAM6,GDPD2,ITGB4,ELOVL2,SLC36A2,CEACAM1,SULT1A1,SEMA3B,NQO1,RAB25,TRIM2,RAB17,GPX2,AHCYL2,GLB1L2,RSPO3,USP2,PLLP,RNASE4,LLGL2,TMPRSS2,ELF3,PRR15,EPCAM,CDH16
Coexpression Atlas	gudmap_developingKidney_e15.5_early proxim tubul_500_k1	DevelopingKidney_e15.5_early proxim tubul_emap-28005_k-means-cluster#1_top-relative-expression-ranked_500	Gudmap Mouse MOE430.2	2.54e-12	1.04e-08	5.82e-11	5.17e-10	20	95	HLA-DMA,HLA-DMB,SERPINA1,HPN,SLC51A,ANPEP,TMEM45B,FXYD2,CIDEB,CDHR2,PBLD,GGT1,SEMA3B,SLC39A5,DPEP1,AMN,TCN2,USH1C,SUSD2,PC
Coexpression Atlas	Arv_SC_fibroblast_1000_K1	AravindRamakr_StemCell_from_inducedPluripotentialStemCells_derived from_from_fibroblast_top-relative-expression-ranked_1000_k-means-cluster#1	PCBC	2.75e-12	1.12e-08	6.24e-11	5.55e-10	23	130	CEACAM5,GCNT3,HLA-DMB,FAM3D,CCL20,FXYD3,TMPRSS4,GDA,MISP,TMEM45B,C15orf48,RASEF,IL2RG,ACSL5,CYP3A5,FAM83E,CEACAM6,RAB25,LINC01559,GPX2,RNF183,TFF3,MALRD1
GO: Cellular Component	GO:0031253	cell projection membrane		3.11e-12	1.94e-09	1.77e-10	1.24e-09	43	441	CEACAM5,ACHE,CEACAM7,ATP8B1,ADORA1,MUC17,PIK3CB,NPC1L1,SCNN1A,ABCG2,ABCC2,MUC20,ANPEP,SLC3A1,SLC9A3,SLC22A5,MTTP,MUC4,MYO1D,MYO6,CDHR2,CEACAM6,CDHR5,SLC46A1,CEACAM1,PTPRH,PTPRJ,DIAPH1,EPS8L3,DPEP1,DPP4,SLC26A3,RAB25,SLC11A2,AMN,SLC26A2,SLC17A4,ACE2,SCARB1,PAK1,ARHGEF2,ARHGAP45,SLC6A14
Coexpression Atlas	gudmap_developingKidney_e15.5_500_k4	DevelopingKidney_e15.5_anlage of loop of Henle_emap-31283_k-means-cluster#4_top-relative-expression-ranked_500	Gudmap Mouse MOE430.2	3.46e-12	1.41e-08	7.82e-11	6.96e-10	17	66	HNF4A,AFP,ALDOB,RBM47,ATP1B1,FXYD2,PRSS8,PAQR5,KIF12,GGT1,TINAG,SLC27A2,DPP4,AMN,MAP7,SGK2,TMPRSS2
Coexpression Atlas	GSM538245_500	Myeloid Cells, DC.4+.SLN, CD11b-FITC CD4-PE CD11c-Alexa750 CD8a-PacificBlue, Lymph Node, avg-3	Immgen.org, GSE15907	3.56e-12	1.45e-08	8.01e-11	7.12e-10	41	407	HK2,HLA-DMA,TMEM176A,KLF4,S100A6,PIK3CB,CCL5,PLAUR,RBM47,TMEM176B,ANPEP,ANXA4,FLVCR1,ZFP36,GDA,PRKCD,ATF3,CTSS,IL6R,NAAA,CYP27A1,GATM,TNFRSF11A,PTAFR,CFB,TMEM150B,ADAP1,GPR35,CXCL16,PAPSS2,TF,TSPAN3,LGALS3,SLC44A1,P2RX4,RASA4,PAK1,CD68,NOSTRIN,EPCAM,STOM
Coexpression	M2226	PILON_KLF1_TARGETS_UP	C2:CGP: Chemical and Genetic Perturbations	4.1e-12	3.94e-08	4.48e-10	4.37e-09	41	497	TLCD4,F2,HNF4A,ME1,TTR,CAMK2N1,SEMA6D,AFP,HPN,CGN,FGB,AK4,ABCG2,PLG,SERPINF2,PLS1,VTN,APOA1,XK,APOA2,APOB,SEMA4G,SLC6A8,IGF2,IGSF1,CXADR,ABCC3,MASP1,ITIH2,SLC36A2,CFB,APOM,FZD5,SLC39A5,SLC27A2,RBP4,NR1H3,TF,TGFBR3,MLXIPL,SLC44A1
Coexpression	M10702	JAEGER_METASTASIS_DN	C2:CGP: Chemical and Genetic Perturbations	4.17e-12	4.01e-08	4.51e-10	4.4e-09	29	259	ENPP2,KLF4,TUBA4A,SCNN1A,QPCT,FXYD3,CXCL14,TXNIP,LSR,CXADR,ABCC3,PRSS3,PRSS8,MYO6,ITGB4,ITPR3,KLF5,COBL,CA2,CA12,RAB25,GPX2,LAMC2,MAP7,ABLIM1,ELMO3,RORA,CDA,TM4SF1
Coexpression	M2533	BOSCO_EPITHELIAL_DIFFERENTIATION_MODULE	C2:CGP: Chemical and Genetic Perturbations	4.32e-12	4.16e-08	4.62e-10	4.51e-09	16	69	CEACAM5,CEACAM7,F3,FAM3D,TMPRSS4,DUOX2,CLDN7,MUC1,MUC4,CEACAM6,PTPN3,LMO7,TMPRSS2,ELF3,TM4SF1,SLC6A14
Coexpression Atlas	Facebase_ST1_Univ_500_4	UniversalReference_WholeMouseP1_top-relative-expression-ranked_500_4	FaceBase_ST1	4.86e-12	1.98e-08	1.09e-10	9.66e-10	29	215	HGD,MGLL,ME1,F3,FCGRT,AGT,PLG,SLC51A,SELENOP,AGPAT2,CXCL14,ATP1B1,ACSL5,NAGA,IRF7,ISG20,ITIH2,CFB,GJB1,CHPT1,EPS8L3,SLC38A3,RAB25,AMN,NOL3,RBP4,LGALS3,TFF2,RNASE4
GO: Biological Process	GO:0010876	lipid localization		5.25e-12	3.54e-08	4.25e-09	3.99e-08	50	576	HEXB,CEACAM5,SLCO2B1,ENPP1,CEACAM7,ATP8B1,FABP1,PRELID2,AGT,NPC1L1,OSBPL9,HRH2,ABCG2,ABCC2,SLC51A,GLTPD2,APOA1,APOA2,APOA4,APOB,PPARA,CPT1A,SLC51B,SLCO2A1,CIDEC,MTTP,PRKCD,DGAT1,ACSL5,CIDEB,TTC39B,ABCC3,ANO9,TMEM135,CEACAM6,ATP10B,TNFRSF11A,APOBR,CEACAM1,APOM,ATP11A,SLC27A2,HNF1A,RBP4,NR1H3,SYT7,ATP10A,P2RX4,SCARB1,SERPINA5
Coexpression	M39158	GAO_LARGE_INTESTINE_24W_C8_GOBLET_CELL	C8: Cell Type Signature	5.68e-12	5.47e-08	6.01e-10	5.86e-09	13	41	CEACAM5,FER1L6,SCNN1A,RASEF,MUC4,SORL1,GALNT3,CEACAM6,CAPN8,MAP7,SYT7,GPA33,ENTPD8
GO: Biological Process	GO:0006869	lipid transport		5.76e-12	3.88e-08	4.25e-09	3.99e-08	47	520	CEACAM5,SLCO2B1,CEACAM7,ATP8B1,FABP1,PRELID2,AGT,NPC1L1,OSBPL9,HRH2,ABCG2,ABCC2,SLC51A,GLTPD2,APOA1,APOA2,APOA4,APOB,PPARA,CPT1A,SLC51B,SLCO2A1,CIDEC,MTTP,PRKCD,DGAT1,ACSL5,CIDEB,TTC39B,ABCC3,ANO9,CEACAM6,ATP10B,TNFRSF11A,APOBR,CEACAM1,APOM,ATP11A,SLC27A2,HNF1A,RBP4,NR1H3,SYT7,ATP10A,P2RX4,SCARB1,SERPINA5
GO: Biological Process	GO:0032787	monocarboxylic acid metabolic process		5.88e-12	3.96e-08	4.25e-09	3.99e-08	58	738	HEXB,EPHX2,CEACAM5,HK2,ENPP1,MGAT4A,CEACAM7,MGLL,ATP8B1,CYP2S1,PFKP,HNF4A,ME1,FABP1,SCD,AGT,OSBPL9,ABCC2,ALDOB,ALOX15B,PRXL2B,FA2H,AOAH,HKDC1,APOA4,FADS6,PPARA,SIRT6,CPT1A,LPIN3,SLC6A8,TRIB3,DGAT1,ACSL5,PECR,CYP2B6,NAAA,CYP3A5,INSIG1,CYP27A1,ABHD3,GATM,CEACAM6,ACSS2,ELOVL2,GGT1,CEACAM1,LPGAT1,SLC27A2,HNF1A,NR1H3,PNPO,CRYL1,MLXIPL,MALRD1,SLC16A3,PAM,PC
Coexpression	M2369	GOBERT_OLIGODENDROCYTE_DIFFERENTIATION_DN	C2:CGP: Chemical and Genetic Perturbations	6.07e-12	5.84e-08	6.35e-10	6.19e-09	65	1088	ENPP2,MGLL,DSCAML1,MGAT3,NDRG1,SEMA6D,FCGRT,PCDH19,OSBPL9,QPCT,UGT8,CCL5,FBXO32,PLS1,LRRC75A,USP53,FLNB,EPB41L4B,KIAA1522,FA2H,MYO18A,PPARA,CPT1A,BHLHE40,SLC1A1,SEMA4G,TXNIP,AATK,BRI3BP,ATF3,MXI1,SORL1,MYO6,TNFSF9,NAGA,ABHD3,GATM,TMBIM1,CHPT1,LPGAT1,CPEB2,WSCD1,NDNF,TCF7L2,TRIM2,SLC26A2,TPPP,ATP13A2,RGS3,LGALS9,SGK2,TGFBR3,ABLIM1,PLLP,SLC35A3,SLC44A1,P4HA1,CLMN,SH3D19,ENTPD5,PAK1,LRP4,RORA,PADI2,…
Coexpression Atlas	gudmap_developingLowerUrinaryTract_e15.5_urothelium_100	DevelopingLowerUrinaryTract_e15.5_Urothelium_emap-28091_top-relative-expression-ranked_100	Gudmap Mouse MOE430.2	6.08e-12	2.48e-08	1.35e-10	1.2e-09	18	78	ATP8B1,TTR,POF1B,S100A6,AFP,UGT8,FXYD3,CLDN7,TMEM45B,OCLN,PRDM16,ABCC3,PAQR5,GLB1L2,LGALS3,TSPAN8,TMPRSS2,CDH16
Coexpression Atlas	gudmap_developingLowerUrinaryTract_P2_bladder urothelium (LCM)_1000_k3	DevelopingLowerUrinaryTract_P2_bladder urothelium (LCM)_emap-30380_k-means-cluster#3_top-relative-expression-ranked_1000	Gudmap Mouse MOE430.2	6.21e-12	2.53e-08	1.37e-10	1.22e-09	30	232	HEXB,MGAT4A,FAM3D,TUBA4A,POF1B,NDRG1,PRR13,RBM47,EPB41L4B,TMC4,VSIG10,MST1,TMEM45B,ATP1B1,TJP3,ABCC3,GALNT3,ATP10B,TMBIM1,BMP2,PTPN3,MARVELD3,TTC22,RAB25,SLC44A4,LGALS3,SLC44A1,LMO7,TSPAN8,NOSTRIN
GO: Biological Process	GO:0009611	response to wounding		6.31e-12	4.25e-08	4.25e-09	3.99e-08	59	760	ERBB3,CEACAM5,ENPP1,CEACAM7,ACVRL1,KLF4,F2,HNF4A,F3,LRG1,HAVCR1,SERPINA1,PIK3CB,HPN,FGB,PLAUR,PLG,SERPINF2,CXCL5,FER1L5,VEGFA,VIL1,VTN,EPB41L4B,TMPRSS4,DUOX2,APOA1,APOA4,CLDN3,PPARA,SLC1A1,ZFP36,PLPP3,PRKCD,CTNNA1,OCLN,IL6R,CXADR,PDX1,CEACAM6,ITGB4,GDNF,CEACAM1,GIPR,PTPRJ,NDNF,DPYSL2,NOL3,NTRK1,PAPSS2,SYT7,PLLP,P2RX4,SCARB1,TSPAN8,PAK1,LRP4,CD151,ARHGEF2
Coexpression Atlas	PCBC_EB_blastocyst_100	Progenitor-Cell-Biology-Consortium_EmbryoidBody_fromBlastocyst-derived-humanEmbryonicStemCells_top-relative-expression-ranked_100	PCBC	6.96e-12	2.83e-08	1.53e-10	1.36e-09	20	100	CDX2,TTR,FABP1,TMEM132C,SERPINA1,HOXC6,AFP,AGT,FGB,VTN,APOA1,APOA2,APOB,FRZB,LCN15,GNRH2,NPNT,RBP4,TF,ORM1
Coexpression Atlas	Facebase_RNAseq_e10.5_Olfactory Pit_1000	FacebaseRNAseq_e10.5_Olfactory Pit_top-relative-expression-ranked_1000	FaceBase_RNAseq	7.22e-12	2.94e-08	1.58e-10	1.4e-09	69	984	ERBB3,HLA-DMA,CYP2S1,KLF4,F3,CKB,PLEKHH1,MFNG,NDRG1,HOOK1,MTUS1,FCGRT,PCDH19,PRR13,CGN,AK4,RBM47,PLS1,TMEM176B,ANXA4,CAMSAP3,SGPP2,PRR15L,CLDN3,CLDN7,CPT1A,CDCP1,LSR,RHPN2,SLCO2A1,CCDC68,RAB11FIP5,RASEF,ATP1B1,FXYD2,PRDM16,MUC4,CTSS,ACSL5,TTC39B,PRSS8,INSIG1,SPOCK2,ACSS2,ELOVL2,IGSF10,NELL2,MTMR11,PTPRJ,KLF5,TMEM163,SLC27A2,NPNT,WSCD1,RAB25,CECR2,MAP7,PAPSS2,LGALS9,GREM2,MLXIPL,ABLIM1,RNASE4,LLGL…
Coexpression Atlas	gudmap_developingKidney_e11.5_ureteric bud_1000_k2	DevelopingKidney_e11.5_ureteric bud_emap-3844_k-means-cluster#2_top-relative-expression-ranked_1000	Gudmap Mouse MOE430.2	7.67e-12	3.12e-08	1.67e-10	1.48e-09	18	79	HLA-DMB,HPN,PRR15L,ANO9,PRSS8,ABHD3,KIF12,GGT1,SEMA3B,SLC27A2,NPNT,CA12,DPP4,MAP7,ELMO3,LLGL2,RASSF6,TMPRSS2
Coexpression	M39231	LAKE_ADULT_KIDNEY_C12_THICK_ASCENDING_LIMB	C8: Cell Type Signature	7.99e-12	7.69e-08	8.27e-10	8.06e-09	35	381	EPHX2,GOLM1,RPS24,CKB,S100A6,HPN,SCNN1A,UGT8,SNHG29,SLC9A3-OT1,FLNB,CXCL14,CPT1A,SLC3A1,TMEM37,ATP1A1,ATP1B1,PRDM16,SORL1,PRSS8,KIF12,PTPN3,COBL,TACC1,CA12,TRIM2,SGK2,USP2,LLGL2,LMO7,KIAA1217,TSPAN8,EPCAM,SERPINA5,CDH16
Coexpression Atlas	PCBC_ratio_EB-blastocyst_vs_EB-cbCD34_1000	ratio_EmbryoidBody-blastocyst_vs_EmbryoidBody-derived-from_CD34-iPSC_top-relative-expression-ranked_1000	PCBC	7.99e-12	3.25e-08	1.73e-10	1.54e-09	67	942	CDX2,ABO,HLA-DMB,SLCO2B1,FOXA3,F2,HNF4A,FABP1,MEP1A,TMEM132C,HAVCR1,SERPINA1,AFP,HPN,AGT,FGB,HRH2,ABCG2,PLG,SERPINF2,ALDOB,ALOX15B,VIL1,VTN,ANPEP,FA2H,APOA1,APOA2,APOA4,APOB,SLC3A1,SLC15A1,MTTP,OCLN,URAD,IL2RG,ACSL5,ABCC3,PRSS3,CDHR5,TRIM14,ITIH2,ITPKA,APOM,GJB1,LCN15,EPS8L3,CREB3L3,SLC39A5,GNRH2,DPEP1,SLC26A3,RAB17,AMN,GPX2,RBP4,SLC44A4,TF,ORM1,MLXIPL,LLGL2,CD7,TM4SF4,CCDC183,LY75,ARHGAP45,CDH17
Coexpression	M34008	BLANCO_MELO_RESPIRATORY_SYNCYTIAL_VIRUS_INFECTION_A594_CELLS_UP	C2:CGP: Chemical and Genetic Perturbations	9.43e-12	9.07e-08	9.65e-10	9.41e-09	30	286	HK2,ACHE,KLF4,F3,PLAUR,FBXO32,PLOD2,ANPEP,CDCP1,C15orf48,ATF3,CTSS,TNFSF10,IRF1,GBP3,IRF7,PTAFR,CFB,CEACAM1,GIPR,BMP2,PTPRH,P4HA2,OAS3,GALNT12,LAMC2,P4HA1,KIAA1217,CD68,MXD1
GO: Cellular Component	GO:0062023	collagen-containing extracellular matrix		9.87e-12	6.17e-09	5.14e-10	3.61e-09	47	532	ACHE,SERPINF1,F2,F3,S100A6,SERPINA1,SEMA6D,MUC17,AGT,FGB,PLG,SERPINF2,VEGFA,VTN,ANG,ANXA4,APOA1,APOA4,HAPLN1,COL23A1,MST1,IGF2,MUC1,MUC4,CTSS,SOD3,PRSS3,SPOCK2,ITGB4,ITIH2,TINAG,SEMA3B,DMBT1,NPNT,INHBE,LAMA2,LAMC2,TF,LGALS3,LGALS4,LGALS9,TGFBR3,ORM1,PCSK6,SERPINB1,CD151,SERPINA5
Coexpression	M14371	NAKAMURA_TUMOR_ZONE_PERIPHERAL_VS_CENTRAL_DN	C2:CGP: Chemical and Genetic Perturbations	1.01e-11	9.75e-08	1.03e-09	1e-08	47	648	HK2,GCNT3,ATP8B1,LRG1,ABHD17C,SIAE,NDRG1,PLAG1,CCL20,CXCL5,PLOD2,VEGFA,SEMA4B,SELENOP,ERO1A,FA2H,SGPP2,TMPRSS4,CP,TMC4,PPARA,SLC1A1,TXNIP,SLC6A8,MUC1,MUC4,CXADR,MXI1,SORL1,ABCC3,PAG1,TNFSF10,NELL2,KLF5,EGLN3,CXCL16,PAPSS2,P4HA1,GUSB,PCSK6,SERPINB1,PAM,ELF3,RORA,HSD17B11,ARHGAP45,SLC6A14
Coexpression Atlas	PCBC_MESO-5_fibroblast_1000	Progenitor-Cell-Biology-Consortium_induced-Mesoderm_from_inducedPluripotentialStemCells_derived from_from_fibroblast_top-relative-expression-ranked_1000	PCBC	1.01e-11	4.09e-08	2.16e-10	1.92e-09	68	969	TLCD4,ZBED10P,FOXA3,HNF4A,MYORG,ADORA1,SEMA6D,HPN,CGN,SCNN1A,QPCT,RBM47,VIL1,VIPR1,VIPR2,CAMSAP3,APOA1,APOA2,APOB,TMC4,CLDN3,FADS6,CLDN7,COL23A1,LSR,RHPN2,SLCO2A1,FRZB,FUT2,OCLN,MUC3A,TJP3,CAPN12,PRSS8,CYP27A1,GATM,PAQR5,KIF12,FAM83E,TNFRSF11A,GCNT1,ELOVL2,BMP2,TMEM92,FZD5,COBL,MARVELD3,B4GALNT3,RAB25,RAB17,CECR2,TMT1B,B3GNT7,GRIK3,MAP7,USH1C,NSUN7,GREM2,ACE2,USP2,MLXIPL,ABCC6P1,EFNA2,LLGL2,TSPAN…
GO: Biological Process	GO:0048878	chemical homeostasis		1.04e-11	6.99e-08	6.35e-09	5.97e-08	84	1328	HEXB,EPHX2,HK2,ENPP1,TLCD4,SERPINF1,FOXA3,F2,HNF4A,CKB,ADORA1,MELTF,CAMK2N1,CLCN2,PIK3CB,SCD,HPN,AGT,NPC1L1,SCNN1A,CCL5,PLCB4,ABCC2,VEGFA,ANG,ANPEP,ERO1A,FLVCR1,HKDC1,CP,SLC39A4,APOA1,XK,APOA2,APOA4,APOB,SIRT6,CLSTN1,SLC1A1,ABCC6,SLC9A3,MTTP,RAB11FIP5,MAPK3,ATP1A1,C1QTNF12,ATP1B1,FXYD2,ATP2A3,DGAT1,TTC39B,INSIG1,SRI,PDX1,SLC46A1,PPP1R3G,STEAP2,ITPR3,APOM,PTPRJ,DIAPH1,SLC39A5,SLC38A3,CA2,CA12,HNF1…
Coexpression	M19766	WU_SILENCED_BY_METHYLATION_IN_BLADDER_CANCER	C2:CGP: Chemical and Genetic Perturbations	1.06e-11	1.02e-07	1.06e-09	1.03e-08	14	52	ERBB3,KLF4,FCGRT,SELENOP,ANPEP,PRKCD,GATM,GCHFR,ITGB2,COBL,LAMA2,USH1C,TGFBR3,TSPAN8
Coexpression Atlas	PCBC_EB_blastocyst_500	Progenitor-Cell-Biology-Consortium_EmbryoidBody_fromBlastocyst-derived-humanEmbryonicStemCells_top-relative-expression-ranked_500	PCBC	1.14e-11	4.63e-08	2.42e-10	2.15e-09	45	496	CDX2,ABO,SLCO2B1,F2,HNF4A,TTR,FABP1,MEP1A,TMEM132C,HAVCR1,SERPINA1,HOXC6,AFP,AGT,FGB,PLG,VIL1,VTN,CXCL14,APOA1,APOA2,POU4F1,APOA4,APOB,CLDN3,IGF2,FRZB,MTTP,URAD,ITIH2,GJB1,NELL2,LCN15,SLC39A5,GNRH2,NPNT,NDNF,RBP4,USH1C,TF,ORM1,ABCC6P1,TM4SF4,RSPO1,CDH17
Coexpression Atlas	PCBC_ctl_BronchioEpithel_500	Progenitor-Cell-Biology-Consortium_reference_BronchioEpithel_top-relative-expression-ranked_500	PCBC	1.14e-11	4.63e-08	2.42e-10	2.15e-09	45	496	CEACAM5,KLF4,F3,FAM3D,POF1B,S100A6,TFCP2L1,NDRG1,SH3RF2,SCNN1A,CCL20,FXYD3,ALOX15B,EPB41L4B,SGPP2,TMPRSS4,CLDN7,CDCP1,MISP,TRIB3,TMEM45B,C15orf48,SDCBP2,PRSS3,PRSS8,GALNT3,TNFSF10,FAM83E,CEACAM6,PTAFR,IL22RA1,ITGB4,PTPN3,KLF5,MARVELD3,TTC22,CA12,RAB25,LINC01559,TCN1,GPX2,LAMC2,CXCL16,RASSF6,SLC6A14
GO: Biological Process	GO:0022600	digestive system process		1.18e-11	7.95e-08	6.45e-09	6.06e-08	24	151	GCNT3,FABP1,NPC1L1,HRH2,ABCG2,PLS1,VIL1,MOGAT2,ISX,APOA1,APOA2,APOA4,MUC13,SLC22A5,MUC4,DGAT1,PBLD,SLC46A1,TCF7L2,RBP4,NR1H3,TFF2,TFF3,SCARB1
Coexpression	M1350	SCHAEFFER_PROSTATE_DEVELOPMENT_48HR_UP	C2:CGP: Chemical and Genetic Perturbations	1.2e-11	1.15e-07	1.19e-09	1.16e-08	38	449	EPHX2,AOC1,PLAC8,TFCP2L1,SCNN1A,MMP7,FXYD3,CORO2A,HKDC1,TMC4,SLCO2A1,TMEM37,ATP1A1,MASP1,GDPD2,ITGB4,ELOVL2,SLC36A2,CEACAM1,SULT1A1,SEMA3B,NQO1,RAB25,TRIM2,RAB17,GPX2,AHCYL2,GLB1L2,RSPO3,USP2,PLLP,RNASE4,LLGL2,TMPRSS2,ELF3,PRR15,EPCAM,CDH16
Coexpression	M38970	JINESH_BLEBBISHIELD_TO_IMMUNE_CELL_FUSION_PBSHMS_DN	C2:CGP: Chemical and Genetic Perturbations	1.24e-11	1.2e-07	1.22e-09	1.19e-08	35	387	HLA-DMA,HLA-DMB,CKB,NDRG1,HOXD1,FCGRT,SCNN1A,MMP7,CCL20,FXYD3,VEGFA,SELENOP,ANG,SGPP2,TMPRSS4,CP,BHLHE40,C15orf48,SDCBP2,PRSS8,TNFSF10,CYP3A5,INSIG1,GCHFR,ISG20,ACSS2,CFB,BMP2,CHPT1,CA12,GPX2,OAS3,NR1H3,SYT7,TSPAN3
GO: Biological Process	GO:0019216	regulation of lipid metabolic process		1.25e-11	8.39e-08	6.45e-09	6.06e-08	44	475	EPHX2,CEACAM5,CEACAM7,GOLM1,F2,HNF4A,FAM3D,FABP1,ADORA1,CLCN2,AGT,SMPD3,ISX,APOA1,APOA2,APOA4,APOB,PPARA,SIRT6,CPT1A,LSR,IGF2,TRIB3,CIDEC,PRKCD,ATP1A1,DGAT1,ACSL5,SORL1,CIDEB,TTC39B,INSIG1,HCAR1,CEACAM6,CEACAM1,BMP2,LPGAT1,TCF7L2,NR1H3,MLXIPL,MALRD1,SCARB1,RORA,PC
Coexpression Atlas	PCBC_MESO-5_1000	Progenitor-Cell-Biology-Consortium_induced-Mesoderm_top-relative-expression-ranked_1000	PCBC	1.27e-11	5.15e-08	2.68e-10	2.38e-09	68	974	CHDH,ZBED10P,FOXA3,HNF4A,LRG1,MYORG,PLEKHH1,ADORA1,SEMA6D,HPN,CGN,QPCT,RBM47,VIL1,VIPR1,VIPR2,CAMSAP3,LMNTD2,APOA1,APOA2,CLDN3,FADS6,CLDN7,COL23A1,LSR,RHPN2,SLCO2A1,FRZB,TMEM37,OCLN,MUC3A,TJP3,CAPN12,PRSS8,GATM,PAQR5,KIF12,FAM83E,TNFRSF11A,ELOVL2,BMP2,TMEM92,FZD5,MARVELD3,B4GALNT3,TMEM150B,NDNF,EGLN3,RAB25,RAB17,CECR2,TMT1B,GALNT12,B3GNT7,GRIK3,MAP7,USH1C,NSUN7,GREM2,ACE2,USP2,MLXIPL,ABCC6P1,EFNA…
Coexpression Atlas	gudmap_RNAseq_e15.5_Podocytes_2500_K4	gudmap_RNAseq_e15.5_Podocytes_2500_K4	Gudmap RNAseq	1.29e-11	5.23e-08	2.7e-10	2.4e-09	33	286	TTR,PLAUR,FA2H,CLDN3,CLDN7,ZFP36,LSR,RASEF,ARHGAP27,FUT2,OCLN,MCTP2,ACSL5,ABCC3,GALNT3,SPOCK2,RNF43,TMBIM1,ITIH2,ITPR3,RAB3B,CA2,EGLN3,RAB25,LAMC2,EFNA1,RASSF6,KIAA1217,TSPAN8,TMPRSS2,ELF3,CDA,EPCAM
Coexpression Atlas	gudmap_developingKidney_e15.5_cortic collect duct_500_k5	DevelopingKidney_e15.5_cortic collect duct_emap-28132_k-means-cluster#5_top-relative-expression-ranked_500	Gudmap Mouse MOE430.2	1.29e-11	5.24e-08	2.7e-10	2.4e-09	19	92	ATP8B1,TFCP2L1,UGT8,MUC20,RNF186,TMEM45B,RHPN2,OCLN,MUC1,SORL1,GALNT3,ATP10B,GJB1,RAB17,GLB1L2,LGALS3,TSPAN8,TMPRSS2,CDH16
Coexpression Atlas	gudmap_developingKidney_e15.5_early proxim tubul_500_k4	DevelopingKidney_e15.5_early proxim tubul_emap-28005_k-means-cluster#4_top-relative-expression-ranked_500	Gudmap Mouse MOE430.2	1.49e-11	6.07e-08	3.11e-10	2.77e-09	20	104	B3GALT5,HNF4A,NDRG1,CLIC5,RBM47,VIL1,UNC5CL,KIF12,PBLD,GCNT1,STEAP2,SLC27A2,CA12,DPP4,SGK2,MLXIPL,LACTB2,ENTPD5,PRR15,ENTPD8
Coexpression Atlas	gudmap_developingKidney_e15.5_Medullary collecting duct_1000_k1	DevelopingKidney_e15.5_Medullary collecting duct_emap-28063_k-means-cluster#1_top-relative-expression-ranked_1000	Gudmap Mouse MOE430.2	1.52e-11	6.19e-08	3.16e-10	2.81e-09	29	225	ATP8B1,FAM3D,POF1B,S100A6,UGT8,DEGS2,FXYD3,MUC20,RNF186,CORO2A,RHPN2,ATP1A1,MUC1,SORL1,ABCC3,PAQR5,ATP10B,GJB1,VILL,KLF5,RAB17,GLB1L2,LGALS3,TFRC,PLLP,CLMN,TSPAN8,TMPRSS2,CDH16
GO: Cellular Component	GO:0009986	cell surface		1.58e-11	9.86e-09	7.58e-10	5.32e-09	77	1184	TSPAN15,CEACAM5,HLA-DMA,ACHE,ENPP1,CEACAM7,ACVRL1,F2,F3,DSCAML1,HAVCR1,MELTF,SEMA6D,MUC17,FCGRT,HPN,SCNN1A,FGB,PLAUR,ABCG2,ABCC2,MMP7,PLG,SERPINF2,ALPI,ALPG,VEGFA,ANPEP,ANXA4,MYO18A,DUOX2,CP,APOA1,APOA4,CLSTN1,SLC1A1,COL23A1,SLC9A3,OCLN,MUC1,IL2RG,CTSS,IL6R,CXADR,SORL1,TJP3,IQGAP2,CEACAM6,SLC46A1,TNFRSF11A,ITGB2,ITGB4,CEACAM1,BMP2,PTPRJ,FZD5,DPP4,SLC11A2,TCN2,NTRK1,TF,LGALS3,TFRC,ACE2,TGFBR3,HHLA…
Coexpression Atlas	gudmap_kidney_adult_Podocyte_MafB_500	kidney_adult_Podocyte_MafB_top-relative-expression-ranked_500	Gudmap Mouse MOE430.2	1.61e-11	6.55e-08	3.32e-10	2.95e-09	42	445	TSPAN15,MGAT4A,WIPF3,MGLL,ATP8B1,ST6GALNAC6,SQOR,HOXC6,CLIC5,OSBPL9,QPCT,PLOD2,VEGFA,SELENOP,FA2H,ANXA4,IFNGR1,SLCO2A1,MYO1D,IQGAP2,MYO6,ERAP1,STEAP2,TMBIM1,CEACAM1,NELL2,CDC42SE2,PTPRJ,DIAPH2,RAB3B,NPNT,CA12,DPP4,TGFBR3,P2RX4,LACTB2,LRRC1,TSPAN8,PAK1,RORA,PRR15,TM4SF1
Coexpression	MM1070	GOBERT_OLIGODENDROCYTE_DIFFERENTIATION_DN	M2:CGP: Chemical and Genetic Perturbations	1.62e-11	1.56e-07	1.57e-09	1.53e-08	65	1113	ENPP2,MGLL,DSCAML1,MGAT3,NDRG1,SEMA6D,FCGRT,PCDH19,OSBPL9,QPCT,UGT8,CCL5,FBXO32,PLS1,LRRC75A,USP53,FLNB,EPB41L4B,KIAA1522,FA2H,MYO18A,PPARA,CPT1A,BHLHE40,SLC1A1,SEMA4G,TXNIP,AATK,BRI3BP,ATF3,MXI1,SORL1,MYO6,TNFSF9,NAGA,ABHD3,GATM,TMBIM1,CHPT1,LPGAT1,CPEB2,WSCD1,NDNF,TCF7L2,TRIM2,SLC26A2,TPPP,ATP13A2,RGS3,LGALS9,SGK2,TGFBR3,ABLIM1,PLLP,SLC35A3,SLC44A1,P4HA1,CLMN,SH3D19,ENTPD5,PAK1,LRP4,RORA,PADI2,…
Coexpression Atlas	gudmap_developingLowerUrinaryTract_e13.5_bladder epithelial cells_1000_k4	DevelopingLowerUrinaryTract_e13.5_bladder epithelial cells_emap-30875_k-means-cluster#4_top-relative-expression-ranked_1000	Gudmap Mouse MOE430.2	1.65e-11	6.73e-08	3.4e-10	3.02e-09	25	168	MGAT4A,POF1B,FABP1,MTA3,CGN,CORO2A,TMPRSS4,TMC4,CLDN3,VSIG10,CDCP1,ZFP36,RHPN2,SLCO2A1,ATP1B1,TJP3,GALNT3,COBL,RAB25,TRIM2,RAB17,EFNA1,LLGL2,RASSF6,TSPAN8
GO: Molecular Function	GO:0046943	carboxylic acid transmembrane transporter activity		1.68e-11	2.48e-08	7.03e-09	5.54e-08	27	188	CEACAM5,SLCO2B1,CEACAM7,ABCG2,ABCC2,SLC51A,SLC1A1,SLC3A1,SLC51B,SLC6A8,SLC15A1,ABCC3,SLC36A1,CEACAM6,SLC46A1,SLC36A2,CEACAM1,SLC38A3,SLC27A2,SLC26A3,SLC26A2,SLC19A3,SFXN1,SLC25A22,SLC16A4,SLC16A3,SLC6A14
GO: Biological Process	GO:0006641	triglyceride metabolic process		1.74e-11	1.17e-07	8.34e-09	7.84e-08	22	128	MGLL,SCD,MOGAT2,AGPAT2,APOA2,APOA4,APOB,CPT1A,LPIN3,CIDEC,MTTP,MOGAT3,DGAT1,ACSL5,SORL1,CIDEB,INSIG1,APOBR,LPGAT1,TCF7L2,NR1H3,SCARB1
Coexpression Atlas	GSM605875_500	Myeloid Cells, Mo.6C+II-.LN, F480+ Ly6c+ MHCII lo/+, Lymph Node, avg-3	Immgen.org, GSE15907	1.74e-11	7.07e-08	3.55e-10	3.16e-09	38	374	HINT1,HLA-DMA,TMEM176A,KLF4,SQOR,PLAC8,S100A6,PLAUR,RBM47,TMEM176B,ANXA4,AOAH,ZFP36,GDA,PRKCD,ATF3,CTSS,IL6R,NAAA,CYP27A1,PTAFR,CFB,CEACAM1,GGH,PTPRJ,ADAP1,GPR35,OAS3,NR1H3,CXCL16,PAPSS2,TF,LGALS3,SLC16A3,RASA4,SCARB1,CD68,STOM
Coexpression Atlas	gudmap_developingKidney_e15.5_stage III -IV renal corpusc_1000_k2	DevelopingKidney_e15.5_stage III -IV renal corpusc_emap-27945_k-means-cluster#2_top-relative-expression-ranked_1000	Gudmap Mouse MOE430.2	1.79e-11	7.3e-08	3.65e-10	3.24e-09	20	105	HNF4A,AFP,ALDOB,SLC3A1,FXYD2,CDHR2,KIF12,ANKS4B,GGT1,APOM,CLRN3,SEMA3B,SLC39A5,SLC27A2,DPP4,AMN,USH1C,ACE2,PRR15,CDH16
Coexpression	M40027	BUSSLINGER_DUODENAL_EARLY_IMMATURE_ENTEROCYTES	C8: Cell Type Signature	1.85e-11	1.78e-07	1.78e-09	1.74e-08	19	113	FABP1,NDRG1,SNHG29,ANPEP,ANXA4,DHRS11,MTTP,ATP1A1,ATP1B1,GATM,PBLD,KLF5,DMBT1,CA2,SLC26A3,LGALS3,LGALS4,CRYL1,TSPAN8
Coexpression Atlas	BM Top 100 - kidney cortex	BM Top 100 - kidney cortex	Body Map	1.87e-11	7.61e-08	3.79e-10	3.37e-09	18	83	AOC1,FABP1,HOXC6,CLIC5,SCNN1A,ALDOB,RBM47,ANPEP,SLC3A1,FXYD2,PAQR5,PBLD,SLC27A2,CA12,GPX3,SLC16A4,EPCAM,CDH16
Coexpression	M2723	LTE2_UP.V1_UP	C6: Oncogenic Signature	1.88e-11	1.81e-07	1.79e-09	1.74e-08	24	188	MGAT4A,GOLM1,ADORA1,SERPINA1,PLCB4,ABCG2,FA2H,SORL1,ABCC3,CEACAM6,GCNT1,GGH,DIAPH2,KIF13B,P4HA2,DPYSL2,RCAN1,SLC26A2,GPX3,GALNT12,TNFRSF11B,C1orf115,P2RX4,CLMN
GO: Molecular Function	GO:0005342	organic acid transmembrane transporter activity		1.91e-11	2.81e-08	7.03e-09	5.54e-08	27	189	CEACAM5,SLCO2B1,CEACAM7,ABCG2,ABCC2,SLC51A,SLC1A1,SLC3A1,SLC51B,SLC6A8,SLC15A1,ABCC3,SLC36A1,CEACAM6,SLC46A1,SLC36A2,CEACAM1,SLC38A3,SLC27A2,SLC26A3,SLC26A2,SLC19A3,SFXN1,SLC25A22,SLC16A4,SLC16A3,SLC6A14
Coexpression	M11033	MENSE_HYPOXIA_UP	C2:CGP: Chemical and Genetic Perturbations	1.92e-11	1.85e-07	1.81e-09	1.77e-08	18	100	HK2,KLF4,NDRG1,PRELID2,SCD,PLOD2,VEGFA,ANG,ERO1A,BHLHE40,ATF3,MXI1,INSIG1,P4HA2,NOL3,RNASE4,P4HA1,RORA
Coexpression Atlas	gudmap_developingKidney_e15.5_Podocyte cells_1000_k5	DevelopingKidney_e15.5_Podocyte cells_emap-27915_k-means-cluster#5_top-relative-expression-ranked_1000	Gudmap Mouse MOE430.2	1.92e-11	7.83e-08	3.88e-10	3.44e-09	19	94	B3GALT5,HNF4A,SERPINA1,FGB,ALDOB,SGPP2,SLC1A1,MYO6,GCNT1,TINAG,NPNT,CA12,DPP4,TF,ACE2,MLXIPL,RASSF6,TSPAN8,PRR15
Coexpression Atlas	gudmap_developingKidney_e11.5_ureteric bud_500_k1	DevelopingKidney_e11.5_ureteric bud_emap-3844_k-means-cluster#1_top-relative-expression-ranked_500	Gudmap Mouse MOE430.2	2.02e-11	8.21e-08	4.04e-10	3.59e-09	17	73	ERBB3,GCNT3,PLAC8,TFCP2L1,CGN,SGPP2,TMC4,CLDN7,OCLN,PRDM16,TJP3,NPNT,RAB17,GLB1L2,TMPRSS2,EPCAM,CDH16
Coexpression	M41018	NAKAYA_PLASMACYTOID_DENDRITIC_CELL_FLUMIST_AGE_18_50YO_7DY_DN	C7:VAX: HIPC Vaccine Response	2.07e-11	1.99e-07	1.93e-09	1.88e-08	57	909	HK2,ACHE,CARD10,ME1,TUBA4A,CKB,ADORA1,TFCP2L1,MFNG,HOOK1,PIK3CB,SCNN1A,CCL5,PLAUR,OSGIN1,VEGFA,SLC39A4,MUC13,ABCC6,HAPLN1,MST1,SLC6A8,IGF2,ASL,ATP1B1,MUC1,MUC4,CXADR,SOD3,CYP2B6,ARHGAP26,LGALS14,CEACAM6,GCHFR,PTAFR,ITGB4,ELOVL2,ITIH2,CEACAM1,APOM,PTPN3,NR1I2,PTPRH,RAB3B,STBD1,TCN2,TRIM31,LAMA2,VWA7,TF,SLC25A22,MLXIPL,LLGL2,SCARB1,CDA,PC,CDH4
Coexpression Atlas	gudmap_kidney_adult_JuxtaGlom_Ren1_Captopr_200	kidney_adult_JuxtaGlom_Ren1_Captopr_top-relative-expression-ranked_200	Gudmap Mouse MOE430.2	2.35e-11	9.58e-08	4.7e-10	4.18e-09	24	157	HGD,ENPP2,MEP1A,NDRG1,QPCT,ABCC2,ALDOB,SELENOP,SLC3A1,SLCO2A1,ATP1B1,FXYD2,GATM,GCNT1,CFB,TINAG,CALML4,SLC27A2,EGLN3,GPX3,LACTB2,TSPAN8,TMPRSS2,CDH16
Coexpression	MM3643	DESCARTES_ORGANOGENESIS_EPITHELIAL_CELLS	M8: Cell Type Signature	2.41e-11	2.32e-07	2.23e-09	2.17e-08	23	174	CYP2S1,POF1B,SH3RF2,CXCL14,CLDN7,CDCP1,LSR,TMEM45B,UNC5CL,CCDC68,MCTP2,PRSS8,GALNT3,PAQR5,ITGB4,BMP8B,KLF5,MARVELD3,LAMC2,B3GNT7,LLGL2,TMPRSS2,EPCAM
Coexpression	MM1052	CHEN_METABOLIC_SYNDROM_NETWORK	M2:CGP: Chemical and Genetic Perturbations	2.45e-11	2.35e-07	2.24e-09	2.19e-08	72	1316	HEXB,TMEM144,HK2,HLA-DMB,SLCO2B1,PFKP,ACVRL1,PLAC8,S100A6,MELTF,SERPINA1,SEMA6D,HPCAL1,SCD,PRR13,SCNN1A,PLAUR,FBXO32,TMEM164,VTN,ANG,ANPEP,UBD,ANXA4,CXCL14,IFNGR1,SLC6A8,SLCO2A1,ASL,CIDEC,FRZB,RAB11FIP5,PRKCD,ATF3,C11orf86,SDCBP2,CTSS,PECR,GALNT3,IQGAP2,GATM,PBLD,GCNT1,ITGB2,HEPH,ITPR3,BMP8B,GJB1,MTMR11,FZD5,SEMA3B,NQO1,CA2,KCNE3,SLC11A2,SRD5A3,LAMA2,CXCL16,KLC4,PTPN18,ATP13A2,LGALS3,P2RX4,RASA4,…
Coexpression Atlas	gudmap_developingLowerUrinaryTract_P1_bladder_1000_J	DevelopingLowerUrinaryTract_P1_bladder_J_emap-30374_top-relative-expression-ranked_1000	Gudmap Mouse MOE430.2	2.67e-11	1.09e-07	5.29e-10	4.71e-09	58	772	GCNT3,ENPP1,TLCD4,MGAT4A,MGLL,ATP8B1,PFKP,KLF4,ME1,SQOR,FAM3D,TTR,POF1B,PLEKHH1,S100A6,QPCT,PLCB4,FBXO32,DEGS2,MMP7,FXYD3,RBM47,FA2H,ANXA4,CXCL14,XK,CDCP1,ZFP36,GDA,TMEM45B,RAB11FIP5,OCLN,SDCBP2,ABCC3,GALNT3,PAQR5,ATP10B,GCNT1,TMBIM1,CEACAM1,DIAPH2,COBL,TACC1,CPEB2,DPEP1,EGLN3,RBP4,TPPP,ATP10A,TF,LGALS3,TGFBR3,SLC44A1,LMO7,SUSD2,TSPAN8,TMPRSS2,TM4SF1
Coexpression Atlas	GSM854324_500	Myeloid Cells, MF.Sbcaps.SLN, CD11b+ CD169+ F4/80-, Lymph Node, avg-2	Immgen.org, GSE15907	2.8e-11	1.14e-07	5.53e-10	4.92e-09	36	345	ENPP2,TMEM176A,LRG1,CKB,S100A6,HAVCR1,SERPINA1,SEMA6D,CCL5,TMEM176B,ANPEP,AOAH,CP,BHLHE40,GDA,ATF3,ATP1B1,CTSS,NAAA,TNFSF9,CYP27A1,GATM,CFB,CEACAM1,BMP2,CA2,KCNE3,CXCL16,PAPSS2,LGALS3,CD7,RASA4,SUSD2,SERPINB1,CD68,NOSTRIN
Coexpression	MM1335	LIU_OVARIAN_CANCER_TUMORS_AND_XENOGRAFTS_XDGS_DN	M2:CGP: Chemical and Genetic Perturbations	2.85e-11	2.74e-07	2.59e-09	2.52e-08	80	1548	HLA-DMA,HLA-DMB,SLCO2B1,ENPP1,ENPP2,SERPINF1,TMEM176A,MGLL,ACVRL1,ME1,SQOR,SERPINA1,MFNG,HOXC6,MTUS1,QPCT,PLAUR,ABCG2,FBXO32,CCL20,PLOD2,SELENOP,TMEM176B,ANPEP,UBD,AOAH,CXCL14,CP,SLC1A1,ZFP36,HAPLN1,IFNGR1,CADPS,SLCO2A1,PNMA2,C15orf48,CCDC68,ATP2A3,IL2RG,CTSS,ACSL5,SOD3,ABCC3,PAG1,NAAA,TNFSF10,CYP27A1,ABHD3,GATM,IRF1,GBP3,TNFRSF11A,PTAFR,STEAP2,APOBR,ITGB2,GDNF,ELOVL2,HEPH,CFB,BMP2,TACC1,CA2,WSCD…
Coexpression Atlas	gudmap_developingLowerUrinaryTract_P1_bladder_1000_B	DevelopingLowerUrinaryTract_P1_bladder_B_emap-30374_top-relative-expression-ranked_1000	Gudmap Mouse MOE430.2	2.95e-11	1.2e-07	5.81e-10	5.16e-09	58	774	GCNT3,ENPP1,TLCD4,MGLL,ATP8B1,PFKP,KLF4,ME1,F3,SQOR,FAM3D,TTR,POF1B,S100A6,NDRG1,QPCT,PLCB4,DEGS2,FXYD3,FA2H,ANXA4,CXCL14,TMC4,CPT1A,ZFP36,TXNIP,GDA,TMEM45B,PLPP3,RASEF,PCP4L1,SDCBP2,ABCC3,PAQR5,ATP10B,CEACAM1,SULT1A1,TMEM70,DIAPH2,COBL,TACC1,MARVELD3,CPEB2,DPEP1,EGLN3,RAB25,RBP4,TPPP,LAMC2,TF,LGALS3,RNASE4,RASSF6,SUSD2,TSPAN8,SERPINB1,TMPRSS2,HSD17B11
GO: Biological Process	GO:0050892	intestinal absorption		2.97e-11	2e-07	1.33e-08	1.25e-07	15	55	GCNT3,FABP1,NPC1L1,ABCG2,PLS1,VIL1,MOGAT2,ISX,APOA1,APOA2,APOA4,DGAT1,SLC46A1,NR1H3,SCARB1
Coexpression Atlas	Arv_SC-H9hpx_1000_K3	AravindRamakr_StemCell-H9hpx_top-relative-expression-ranked_1000_k-means-cluster#3	PCBC	3.04e-11	1.24e-07	5.95e-10	5.29e-09	21	120	CEACAM5,GCNT3,HLA-DMB,FAM3D,PLAC8,CCL20,FXYD3,AOAH,TMPRSS4,CLDN7,GDA,MISP,TRIB3,TMEM45B,C15orf48,FAM83E,CEACAM6,SLC27A2,RAB25,LINC01559,GPX2
Coexpression Atlas	PCBC_ctl_SmallAirwayEpithel_500	Progenitor-Cell-Biology-Consortium_reference_SmallAirwayEpithel_top-relative-expression-ranked_500	PCBC	3.33e-11	1.36e-07	6.47e-10	5.75e-09	44	493	KLF4,F3,S100A6,SERPINA1,TFCP2L1,NDRG1,SH3RF2,CCL20,FXYD3,ALOX15B,EPB41L4B,SGPP2,HKDC1,TMPRSS4,CXCL14,TMC4,CLDN7,CDCP1,LSR,MISP,TRIB3,TMEM45B,RNF39,SDCBP2,ABCC3,PRSS3,PRSS8,GALNT3,TNFSF10,FAM83E,PTAFR,ITGB4,NAGS,PTPN3,KLF5,TTC22,ESPN,CA12,GPX2,GPX3,LAMC2,CXCL16,SLC16A4,RASSF6
Coexpression Atlas	gudmap_developingKidney_e15.5_ureter tip_flank cortic collct_500_k3	DevelopingKidney_e15.5_ureter tip_flank cortic collct_emap-27752_k-means-cluster#3_top-relative-expression-ranked_500	Gudmap Mouse MOE430.2	3.34e-11	1.36e-07	6.47e-10	5.75e-09	13	39	CHDH,AFP,HPN,RBM47,APOA1,TMEM45B,PRSS8,GALNT3,KIF12,SLC27A2,NPNT,DPP4,TMPRSS2
GO: Molecular Function	GO:0005215	transporter activity		3.36e-11	4.96e-08	9.92e-09	7.81e-08	85	1332	TMEM144,CEACAM5,SLCO2B1,CEACAM7,ATP8B1,LRG1,FABP1,S100A6,CLCN2,CLIC5,PRELID2,AFP,NPC1L1,SCNN1A,OSBPL9,ABCG2,ABCC2,SLC51A,FXYD3,GLTPD2,FLVCR1,SLC39A4,APOA1,APOA2,APOA4,APOB,TMC4,SLC1A1,ABCC6,SLC3A1,SLC51B,SLC6A8,SLC9A3,SLC15A1,SLC17A9,SLCO2A1,CIDEC,SLC22A5,TMEM37,MTTP,SLC45A1,ATP1A1,ATP1B1,ATP2A3,CIDEB,ABCC3,ANO9,SLC36A1,CEACAM6,ATP10B,SLC46A1,SLC36A2,CEACAM1,ITPR3,APOM,GJB1,ATP11A,SLC39A5,SLC38A3…
Coexpression	M11857	RODRIGUES_NTN1_TARGETS_DN	C2:CGP: Chemical and Genetic Perturbations	3.37e-11	3.24e-07	3.03e-09	2.95e-08	22	161	CDX2,ADORA1,VEGFA,VIL1,FLNB,MYO18A,CLDN3,SEMA4G,IFNGR1,GDA,PRSS3,PRSS8,MYO1A,ARHGAP26,ITGB4,SULT1A1,RAB25,USH1C,PAPSS2,LGALS4,TSPAN8,PCDH1
Coexpression	M40220	DESCARTES_FETAL_KIDNEY_URETERIC_BUD_CELLS	C8: Cell Type Signature	3.41e-11	3.28e-07	3.04e-09	2.96e-08	30	301	AOC1,FAM3D,POF1B,CGN,DEGS2,MMP7,FXYD3,EPB41L4B,FA2H,TMC4,CLDN7,CDCP1,SHROOM1,TMEM45B,RASEF,MUC1,PRDM16,MOGAT3,ATP10B,ITGB4,RNF43,RAB17,GPX2,GALNT12,RNF183,ELMO3,RASSF6,TMPRSS2,ELF3,PRR15
Coexpression Atlas	gudmap_developingKidney_e15.5_Proximal Tubules_100	DevelopingKidney_e15.5_Proximal Tubules_emap-28005_top-relative-expression-ranked_100	Gudmap Mouse MOE430.2	4.02e-11	1.64e-07	7.76e-10	6.9e-09	17	76	HNF4A,MEP1A,AFP,ALDOB,VIL1,SLC3A1,UNC5CL,FXYD2,CDHR2,KIF12,GGT1,TINAG,CLRN3,SLC27A2,DPP4,AMN,SGK2
Coexpression	M2725	MEK_UP.V1_UP	C6: Oncogenic Signature	4.1e-11	3.95e-07	3.62e-09	3.53e-08	24	195	CEACAM5,GOLM1,KLF4,S100A6,CAMK2N1,FGB,ERO1A,TMPRSS4,NT5C2,CXADR,SORL1,ABCC3,MYO1D,CEACAM6,GCNT1,ITGB4,EGLN3,GPX2,GPX3,GALNT12,TNFRSF11B,C1orf115,CLMN,PCDH1
Coexpression	MM1061	PILON_KLF1_TARGETS_UP	M2:CGP: Chemical and Genetic Perturbations	4.14e-11	3.98e-07	3.62e-09	3.53e-08	41	535	TLCD4,F2,HNF4A,ME1,TTR,CAMK2N1,SEMA6D,AFP,HPN,CGN,FGB,AK4,ABCG2,PLG,SERPINF2,PLS1,VTN,APOA1,XK,APOA2,APOB,SEMA4G,SLC6A8,IGF2,IGSF1,CXADR,ABCC3,MASP1,ITIH2,SLC36A2,CFB,APOM,FZD5,SLC39A5,SLC27A2,RBP4,NR1H3,TF,TGFBR3,MLXIPL,SLC44A1
Coexpression	M13661	CREIGHTON_ENDOCRINE_THERAPY_RESISTANCE_5	C2:CGP: Chemical and Genetic Perturbations	4.33e-11	4.17e-07	3.75e-09	3.66e-08	39	491	CEACAM5,ENPP1,CEACAM7,MGLL,ATP8B1,SQOR,ABHD17C,MTA3,MTUS1,EPB41L4B,CORO2A,PRR15L,VSIG10,ZFP36,TRIB3,TMEM45B,CCDC68,OCLN,MUC1,ATP2A3,TTC39B,GALNT3,TMEM135,CEACAM6,GUCD1,PTPRJ,FZD5,TACC1,CPEB2,KIF13B,EGLN3,ADAP1,SLC11A2,PLLP,C1orf115,SH3D19,TMPRSS2,NOSTRIN,STOM
Coexpression Atlas	GSM854269_500	Myeloid Cells, DC.103-11b+24+.Lu, MHCII+ CD11c+ CD103- CD11b+ CD24+, Lung, avg-2	Immgen.org, GSE15907	4.44e-11	1.81e-07	8.52e-10	7.57e-09	39	404	HEXB,HK2,HLA-DMA,TMEM176A,CYP2S1,KLF4,CKB,S100A6,FCGRT,SCD,QPCT,CCL5,PLAUR,RBM47,TMEM176B,ANPEP,ANXA4,BHLHE40,ZFP36,GDA,C15orf48,ATF3,CTNNA1,CTSS,NAAA,TNFSF9,CYP27A1,NAGA,GATM,PTAFR,KCNE3,CXCL16,TF,LGALS3,PAK1,CD68,NOSTRIN,STOM,LRRFIP2
Coexpression	M2133	QI_HYPOXIA	C2:CGP: Chemical and Genetic Perturbations	4.51e-11	4.34e-07	3.88e-09	3.78e-08	20	133	HK2,CYP2S1,PFKP,NDRG1,SCD,AK4,PLOD2,VEGFA,BHLHE40,MXI1,TNFSF9,INSIG1,ACSS2,ESPN,P4HA2,EGLN3,GPR35,EFNA1,P4HA1,RORA
Coexpression Atlas	gudmap_developingLowerUrinaryTract_e15.5_ureteral tissue_200	DevelopingLowerUrinaryTract_e15.5_ureteral tissue_emap-8234_top-relative-expression-ranked_200	Gudmap Mouse MOE430.2	4.64e-11	1.89e-07	8.86e-10	7.88e-09	24	162	FOXA3,F2,HNF4A,TTR,FABP1,SERPINA1,AFP,FGB,PLG,SERPINF2,ALDOB,VTN,APOA1,APOB,CYP3A5,ISG20,ITIH2,APOM,CA2,SLC27A2,RBP4,TF,PNPO,TSPAN8
GO: Biological Process	GO:0044283	small molecule biosynthetic process		4.82e-11	3.25e-07	2.03e-08	1.91e-07	54	694	CEACAM5,CEACAM7,MGLL,HNF4A,FAM3D,CLCN2,SCD,AGT,NPC1L1,OSBPL9,PLOD2,ALOX15B,HSD17B7,PRXL2B,FA2H,APOA1,APOA4,APOB,FADS6,PPARA,SIRT6,MST1,TRIB3,ASL,ATF3,C1QTNF12,IPMK,PECR,CYP3A5,INSIG1,CYP27A1,ABHD3,GATM,CEACAM6,PTAFR,ACSS2,ELOVL2,NAGS,GGT1,ITPKA,CEACAM1,BMP2,LPGAT1,SLC27A2,HNF1A,TCF7L2,SRD5A3,RBP4,NR1H3,PNPO,MLXIPL,MALRD1,SLC39A14,PC
Coexpression	M2214	CHEMNITZ_RESPONSE_TO_PROSTAGLANDIN_E2_DN	C2:CGP: Chemical and Genetic Perturbations	5.06e-11	4.87e-07	4.31e-09	4.2e-08	35	407	CHDH,KLF4,SCNN1A,DEGS2,RBM47,PLS1,PRR15L,TMC4,CLDN7,CLSTN1,TXNIP,LRRC19,OCLN,MUC3A,CXADR,TJP3,PRSS8,GALNT3,TNFSF10,GATM,ACSS2,COBL,MARVELD3,WSCD1,DPP4,C12orf75,RBP4,MAP7,SLC44A4,NSUN7,TGFBR3,LMO7,SH3D19,ELF3,LRRFIP2
Coexpression Atlas	GSM854287_500	Myeloid Cells, DC.8-4-11b+.SLN, CD11b-FITC CD4-PE CD11c-eFluor780 CD8a-eFluor450 C, Lymph Node, avg-1	Immgen.org, GSE15907	5.54e-11	2.25e-07	1.05e-09	9.36e-09	39	407	HLA-DMA,TMEM176A,SEMA6D,CCL5,TMEM176B,ANPEP,ANXA4,VSIG10,BHLHE40,ZFP36,GDA,ATF3,CTNNA1,FXYD2,CTSS,NAAA,CYP27A1,GATM,TNFRSF11A,PTAFR,CFB,MVP,NDNF,ADAP1,ARRDC4,GALNT12,CXCL16,PAPSS2,TSPAN3,LGALS3,SLC44A1,RASA4,PAK1,SERPINB1,CD68,NOSTRIN,LY75,MXD1,STOM
Coexpression Atlas	PCBC_ratio_MESO-30_from-ESC_vs_MESO-30_from-OSK-L-l-p53KD_cfr-2X-p05	Mesoderm Day 30-reprogram_NA_vs_Mesoderm Day 30-reprogram_OSK-L-l-p53KD-Confounder_removed-fold2.0_adjp0.05	PCBC_AltAnalyze	5.83e-11	2.37e-07	1.1e-09	9.77e-09	27	207	HGD,CDX2,CHDH,FOXA3,HNF4A,HAVCR1,SERPINA4,CCL20,DUOXA2,VIL1,VTN,ANPEP,UBD,ANXA4,HKDC1,UNC5CL,MTTP,URAD,IL2RG,SOD3,ITIH2,GJB1,NELL2,GNRH2,USH1C,TM4SF4,TMPRSS2
Coexpression Atlas	PCBC_ratio_MESO-30_from-ESC_vs_MESO-30_from-episomal_cfr-2X-p05	Mesoderm Day 30-method_NA_vs_Mesoderm Day 30-method_episomal-Confounder_removed-fold2.0_adjp0.05	PCBC_AltAnalyze	5.83e-11	2.37e-07	1.1e-09	9.77e-09	27	207	HGD,CDX2,CHDH,FOXA3,HNF4A,HAVCR1,SERPINA4,CCL20,DUOXA2,VIL1,VTN,ANPEP,UBD,ANXA4,HKDC1,UNC5CL,MTTP,URAD,IL2RG,SOD3,ITIH2,GJB1,NELL2,GNRH2,USH1C,TM4SF4,TMPRSS2
Coexpression	M19432	MCBRYAN_PUBERTAL_BREAST_4_5WK_UP	C2:CGP: Chemical and Genetic Perturbations	6.11e-11	5.88e-07	5.16e-09	5.03e-08	28	270	ERBB3,TLCD4,F3,TUBA4A,POF1B,PLAC8,FBXO32,FXYD3,EPB41L4B,CXCL14,CLDN3,CLDN7,CPT1A,CDCP1,SLCO2A1,ATP1A1,OCLN,FXYD2,ABCC3,GALNT3,CEACAM1,KLF5,RAB25,RAB17,TSPAN8,TMPRSS2,EPCAM,PADI2
Coexpression Atlas	gudmap_developingKidney_e11.5_ureteric bud_500_k4	DevelopingKidney_e11.5_ureteric bud_emap-3844_k-means-cluster#4_top-relative-expression-ranked_500	Gudmap Mouse MOE430.2	6.87e-11	2.79e-07	1.29e-09	1.15e-08	13	41	HPN,ANO9,PRSS8,KIF12,GGT1,SLC27A2,NPNT,CA12,DPP4,MAP7,LLGL2,RASSF6,TMPRSS2
Coexpression	M7251	GSE18281_SUBCAPSULAR_CORTICAL_REGION_VS_WHOLE_CORTEX_THYMUS_UP	C7:IMMUNESIGDB: ImmuneSigDB	7.02e-11	6.75e-07	5.67e-09	5.53e-08	24	200	CYP2S1,TUBA4A,MYORG,FCGRT,SCD,CPT1A,TXNIP,ATP1A1,SORL1,CYP2B6,SRI,SLC46A1,RETSAT,CHPT1,NQO1,CALML4,SLC27A2,NPNT,SLC11A2,KLC4,PAPSS2,LGALS4,RNASE4,LACTB2
Coexpression	M5891	HALLMARK_HYPOXIA	H: Hallmark	7.02e-11	6.75e-07	5.67e-09	5.53e-08	24	200	HK2,PFKP,F3,PLAC8,NDRG1,AK4,PLAUR,ALDOB,VEGFA,ERO1A,CP,BHLHE40,ZFP36,ATF3,MXI1,ISG20,CA12,P4HA2,STBD1,EFNA1,P4HA1,SCARB1,PAM,RORA
Coexpression	M5937	HALLMARK_GLYCOLYSIS	H: Hallmark	7.02e-11	6.75e-07	5.67e-09	5.53e-08	24	200	HK2,PFKP,ME1,AK4,ALDOB,PLOD2,VEGFA,ANG,ERO1A,CLDN3,MXI1,ISG20,P4HA2,EGLN3,SRD5A3,NOL3,TFF3,SLC35A3,SLC16A3,P4HA1,GUSB,PAM,ELF3,PC
Coexpression	M5921	HALLMARK_COMPLEMENT	H: Hallmark	7.02e-11	6.75e-07	5.67e-09	5.53e-08	24	200	F2,HNF4A,ME1,F3,SERPINA1,CCL5,PLAUR,PLG,ANG,CP,APOA4,SIRT6,PRKCD,CTSS,PRSS3,IRF1,SPOCK2,IRF7,CFB,CA2,DPP4,TMPRSS6,LGALS3,CDA
Coexpression	M5907	HALLMARK_ESTROGEN_RESPONSE_LATE	H: Hallmark	7.02e-11	6.75e-07	5.67e-09	5.53e-08	24	200	KLF4,CKB,SERPINA1,SCNN1A,FLNB,CXCL14,ZFP36,LSR,SLC22A5,IGSF1,TJP3,ISG20,CHPT1,SEMA3B,CA2,SLC27A2,CA12,SLC26A2,LAMC2,PAPSS2,TFF3,LLGL2,SCARB1,SERPINA5
Transcription Factor Binding Site	V$HNF1_01	V$HNF1_01	TFBS	7.24e-11	7.28e-08	1.82e-08	1.36e-07	23	195	HNF4A,HAVCR1,SERPINA4,HOXC6,AFP,HPN,PLG,RBM47,ANPEP,SEMA4G,SLC3A1,FXYD2,KIF12,APOM,TINAG,HNF1A,SLC26A3,SGK2,RNASE4,TM4SF4,SLC39A14,CDH16,CDH17
Coexpression	M12921	BLALOCK_ALZHEIMERS_DISEASE_UP	C2:CGP: Chemical and Genetic Perturbations	8.34e-11	8.03e-07	6.69e-09	6.52e-08	83	1671	PCSK5,ATP8B1,SERPINA4,MTUS1,PLAG1,PLG,PLOD2,SELENOP,HSD17B7,ANG,FA2H,AGPAT2,MYO18A,SIRT6,ZFP36,SEMA4G,TXNIP,SLC6A8,AATK,TRIB3,CTNNA1,FUT2,MUC1,IL2RG,CTSS,IL6R,MXI1,MASP1,MYO1A,IQGAP2,MYO6,TNFSF10,ERAP1,ARHGAP26,INSIG1,LGALS14,NAGA,FAXDC2,IRF7,TRIM14,IL22RA1,ITGB4,TMBIM1,HEPH,GGT1,GJB1,MTMR11,PTPRH,KLF5,SEMA3B,NQO1,DIAPH2,TACC1,CALML4,KIF13B,TCF7L2,ADAP1,TCN2,SLC26A2,GPX3,LAMA2,MAP7,USH1C,TF,TNFRS…
Coexpression Atlas	GSM538265_500	Myeloid Cells, DC.8-4-11b+.Sp, CD11b CD4 CD45 CD11c CD8a, Spleen, avg-1	Immgen.org, GSE15907	8.76e-11	3.57e-07	1.64e-09	1.45e-08	38	395	HK2,HLA-DMA,TMEM176A,CKB,S100A6,PIK3CB,CCL5,RBM47,FLNB,TMEM176B,ANPEP,FLVCR1,BHLHE40,ZFP36,ATF3,CTSS,IL6R,NAAA,CYP27A1,GATM,TNFRSF11A,PTAFR,PTPN3,PTPRJ,TMEM150B,DPP4,ADAP1,ARRDC4,GPR35,CXCL16,LGALS3,TFRC,CD7,RASA4,PAK1,CD68,NOSTRIN,STOM
Coexpression Atlas	PCBC_ratio_DE_vs_ECTO_cfr-2X-p05	Endoderm Differentiated Cells_vs_Ectoderm Differentiated Cells-Confounder_removed-fold2.0_adjp0.05	PCBC_AltAnalyze	8.88e-11	3.61e-07	1.65e-09	1.47e-08	58	796	ERBB3,HK2,ACHE,CYP2S1,FOXA3,F3,TUBA4A,MYORG,SEMA6D,SCD,SCNN1A,QPCT,AK4,PLOD2,USP53,FLNB,SELENOP,CORO2A,FLVCR1,AGPAT2,APOA1,APOA2,CLDN7,VSIG10,BHLHE40,SLC1A1,COL23A1,FAR2,SLCO2A1,ASL,FRZB,TTC39B,MYO1D,CYP27A1,TMEM135,GCHFR,ELOVL2,TMBIM1,ITPR3,BMP2,FZD5,KLF5,LPGAT1,RAB25,RAB17,SRD5A3,GPX3,B3GNT7,MAP7,TFRC,SLC35A3,SLC44A1,SLC16A3,INF2,CDA,SLC39A14,EPCAM,PCDH1
Coexpression Atlas	gudmap_dev gonad_e12.5_M_SertoliCell_Sox9_1000	dev gonad_e12.5_M_SertoliCell_Sox9_top-relative-expression-ranked_1000	Gudmap Mouse ST 1.0	9.12e-11	3.71e-07	1.69e-09	1.5e-08	62	884	TSPAN15,ERBB3,HK2,ENPP1,WIPF3,CYP2S1,ME1,F3,ADORA1,CLCN2,MTA3,HOOK1,HPCAL1,SCD,CGN,PLOD2,USP53,ANPEP,ERO1A,ANXA4,DHRS11,CAMSAP3,VSIG10,SLC6A8,LSR,CADPS,PRKCSH,MAPK3,ATP1A1,ATP1B1,MASP1,NAAA,IQGAP2,ERAP1,ABHD3,GATM,GCNT1,ACSS2,GDNF,CDC42SE2,TACC1,RAB3B,ESPN,RCAN1,TCN2,MAP7,PAPSS2,GREM2,CRYL1,P2RX4,SLC16A4,P4HA1,KIAA1217,SH3D19,SCARB1,PCSK6,LRRC1,ENTPD5,LRP4,CD151,PADI2,SLC6A14
Coexpression	MM1049	WUNDER_INFLAMMATORY_RESPONSE_AND_CHOLESTEROL_UP	M2:CGP: Chemical and Genetic Perturbations	1.04e-10	1e-06	8.28e-09	8.08e-08	16	84	HLA-DMA,HLA-DMB,PLAC8,SERPINA1,MUC17,CCL5,CXCL5,ERO1A,CTSS,PRSS3,GATM,GBP3,DMBT1,TFF3,TFRC,LY75
Coexpression Atlas	ratio_EB_vs_SC_1000_K5	ratio_EmbryoidBody_vs_StemCell_top-relative-expression-ranked_1000_k-means-cluster#5	PCBC	1.06e-10	4.33e-07	1.96e-09	1.74e-08	39	416	CDX2,F2,TTR,FABP1,TMEM132C,HAVCR1,SERPINA1,HOXC6,AFP,PCDH19,FGB,SMPD3,PLG,GLTPD2,VTN,CXCL14,APOA1,APOA2,POU4F1,APOA4,APOB,HAPLN1,IGF2,FRZB,PRDM16,URAD,GDNF,ITIH2,LCN15,SLC39A5,GNRH2,NPNT,NDNF,RBP4,TF,ABCC6P1,TM4SF4,CCDC183,CDH17
Coexpression Atlas	PCBC_DE_fibroblast_1000	Progenitor-Cell-Biology-Consortium_inducedDefinitiveEndoderm_fromFibroblast-derived-iPSC_top-relative-expression-ranked_1000	PCBC	1.07e-10	4.34e-07	1.96e-09	1.74e-08	66	977	ACHE,ENPP1,B3GALT5,ZBED10P,FOXA3,HNF4A,MYORG,HPN,SCNN1A,QPCT,CXCL5,VIL1,VIPR1,VIPR2,SELENOP,CORO2A,CAMSAP3,TMEM253,APOA1,APOA2,CLDN3,FADS6,CLDN7,SLC1A1,COL23A1,LSR,RHPN2,SLCO2A1,FRZB,PCP4L1,IGSF1,OCLN,MUC3A,TJP3,PRSS8,CYP27A1,GATM,PAQR5,TNFRSF11A,GCNT1,GDNF,ELOVL2,BMP2,TMEM92,FZD5,KLF5,MARVELD3,B4GALNT3,RAB25,RAB17,CECR2,TMT1B,B3GNT7,GRIK3,MAP7,NSUN7,GREM2,USP2,MLXIPL,ABCC6P1,EFNA2,LLGL2,TSPAN8,T…
Coexpression Atlas	Arv_SC-hpx_blastocyst_500	AravindRamakr_StemCell-hypoxiaGrown_fromBlastocyst-derived-humanEmbryonicStemCells_top-relative-expression-ranked_500	PCBC	1.1e-10	4.46e-07	1.99e-09	1.77e-08	43	492	CEACAM5,AOC1,SYN3,CEACAM7,B3GALT5,CYP2S1,FOXA3,FAM3D,FABP1,MEP1A,SERPINA1,SCNN1A,FXYD3,ALDOB,CXCL5,ALPI,TMEM176B,APOA4,CLDN3,MUC13,LSR,MISP,C15orf48,MUC3A,PRSS8,MYO1A,CYP3A5,FAM83E,CDHR5,COBL,MARVELD3,DMBT1,PHGR1,SLC39A5,INHBE,SLC26A3,TRIM31,LGALS4,TFF3,TSPAN8,TMPRSS2,EPCAM,CDH17
Coexpression Atlas	Arv_SC-H9hpx_500	AravindRamakr_StemCell-H9hpx_top-relative-expression-ranked_500	PCBC	1.1e-10	4.46e-07	1.99e-09	1.77e-08	43	492	CEACAM5,AOC1,SYN3,CEACAM7,B3GALT5,CYP2S1,FOXA3,FAM3D,FABP1,MEP1A,SERPINA1,SCNN1A,FXYD3,ALDOB,CXCL5,ALPI,TMEM176B,APOA4,CLDN3,MUC13,LSR,MISP,C15orf48,MUC3A,PRSS8,MYO1A,CYP3A5,FAM83E,CDHR5,COBL,MARVELD3,DMBT1,PHGR1,SLC39A5,INHBE,SLC26A3,TRIM31,LGALS4,TFF3,TSPAN8,TMPRSS2,EPCAM,CDH17
Coexpression	MM1290	QI_HYPOXIA	M2:CGP: Chemical and Genetic Perturbations	1.17e-10	1.13e-06	9.22e-09	8.99e-08	20	140	HK2,CYP2S1,PFKP,NDRG1,SCD,AK4,PLOD2,VEGFA,BHLHE40,MXI1,TNFSF9,INSIG1,ACSS2,ESPN,P4HA2,EGLN3,GPR35,EFNA1,P4HA1,RORA
Coexpression	M2242	BRUINS_UVC_RESPONSE_VIA_TP53_GROUP_A	C2:CGP: Chemical and Genetic Perturbations	1.2e-10	1.15e-06	9.36e-09	9.13e-08	55	899	HGD,PHYKPL,ENPP1,CEACAM7,B3GALT5,SIAE,PRELID2,ABCG2,ALDOB,RBM47,HSD17B7,VTN,ANPEP,ERO1A,SH3KBP1,CAMSAP3,KIF16B,SLC39A4,APOA4,CLDN3,MISP,TRIB3,ASL,ATF3,C11orf86,FXYD2,PRDM16,CIDEB,ANO9,PRSS3,PAG1,CYP2B6,NAAA,TNFSF9,CYP3A5,GATM,CDHR5,STEAP2,CFB,APOM,GUCD1,COBL,TMEM163,CALML4,EPS8L3,CECR2,KLC4,SLC44A4,PNPO,ACE2,RNF220,TM4SF4,RFLNA,ENTPD8,SLC6A14
Coexpression	M12671	SENGUPTA_NASOPHARYNGEAL_CARCINOMA_DN	C2:CGP: Chemical and Genetic Perturbations	1.29e-10	1.24e-06	9.99e-09	9.74e-08	32	358	MGLL,FAM3D,LRG1,CKB,CGN,MUC20,EPB41L4B,TMPRSS4,TMC4,CLDN7,MUC13,TMEM45B,PCP4L1,FUT2,MUC1,MUC4,TJP3,MYO1D,ATP10B,CFB,VILL,NQO1,COBL,SLC27A2,TPPP,B3GNT7,SLC44A4,TFF3,CRYL1,ABLIM1,ELF3,PRR15
GO: Biological Process	GO:0006639	acylglycerol metabolic process		1.33e-10	8.93e-07	5.25e-08	4.93e-07	23	155	MGLL,SCD,ANG,MOGAT2,AGPAT2,APOA2,APOA4,APOB,CPT1A,LPIN3,CIDEC,MTTP,MOGAT3,DGAT1,ACSL5,SORL1,CIDEB,INSIG1,APOBR,LPGAT1,TCF7L2,NR1H3,SCARB1
Coexpression	MM1050	SWEET_LUNG_CANCER_KRAS_UP	M2:CGP: Chemical and Genetic Perturbations	1.43e-10	1.37e-06	1.1e-08	1.07e-07	40	534	CEACAM5,HK2,HLA-DMA,HLA-DMB,TLCD4,CEACAM7,GOLM1,ME1,F3,LRG1,TFCP2L1,HOXD1,SCD,HPN,VIL1,KIAA1522,ANXA4,CLDN3,CLDN7,BHLHE40,ATP1A1,MUC1,CTSS,ACSL5,GALNT3,TNFSF9,CEACAM6,ITGB2,CEACAM1,KLF5,ATP11A,RBP4,LAMC2,LGALS3,ACE2,ORM1,TSPAN8,CD68,LY75,EPCAM
Coexpression Atlas	gudmap_developingKidney_e15.5_anlage of loop of Henle_500	DevelopingKidney_e15.5_anlage of loop of Henle_emap-31283_top-relative-expression-ranked_500	Gudmap Mouse MOE430.2	1.46e-10	5.95e-07	2.64e-09	2.35e-08	38	402	RGMB,MGAT4A,PFKP,HNF4A,TFCP2L1,CLIC5,AFP,UGT8,ALDOB,RBM47,VEGFA,SGPP2,CLDN3,IGF2,ATP1B1,MUC1,FXYD2,PRDM16,SORL1,PRSS8,PAQR5,KIF12,GDNF,GGT1,TINAG,SLC27A2,WSCD1,DPP4,AMN,MAP7,LGALS3,TFRC,SGK2,RASSF6,TSPAN8,TMPRSS2,CDH4,CDH16
Coexpression	M2636	ERBB2_UP.V1_UP	C6: Oncogenic Signature	1.47e-10	1.41e-06	1.12e-08	1.09e-07	23	190	CEACAM5,ACHE,MGAT4A,S100A6,SERPINA1,CAMK2N1,NDRG1,VIPR1,MUC1,CXADR,ABCC3,MYO1D,CEACAM6,ITGB4,P4HA2,EGLN3,GALNT12,PAPSS2,TNFRSF11B,C1orf115,CLMN,HSD17B11,PCDH1
GO: Cellular Component	GO:0031528	microvillus membrane		1.49e-10	9.31e-08	6.65e-09	4.66e-08	14	52	CEACAM5,CEACAM7,MUC20,MTTP,MUC4,CDHR2,CEACAM6,CDHR5,CEACAM1,PTPRH,DPEP1,AMN,SLC26A2,SCARB1
Coexpression	M14072	WINTER_HYPOXIA_METAGENE	C2:CGP: Chemical and Genetic Perturbations	1.49e-10	1.43e-06	1.13e-08	1.1e-07	26	243	HK2,F3,NDRG1,PLAUR,MMP7,PLOD2,VEGFA,CP,PPARA,BHLHE40,TXNIP,SLC6A8,IGF2,MUC1,MXI1,SORL1,INSIG1,CA12,P4HA2,SYT7,TF,TFF3,TFRC,EFNA1,P4HA1,ELF3
Coexpression Atlas	gudmap_developingKidney_e15.5_Proximal Tubules_1000_k5	DevelopingKidney_e15.5_Proximal Tubules_emap-28005_k-means-cluster#5_top-relative-expression-ranked_1000	Gudmap Mouse MOE430.2	1.55e-10	6.31e-07	2.79e-09	2.48e-08	31	280	HGD,ENPP2,B3GALT5,HNF4A,MEP1A,SERPINA1,RBM47,PLS1,VIL1,AOAH,UNC5CL,SLC22A5,MYO6,KIF12,PBLD,GCNT1,ACSS2,STEAP2,ELOVL2,GUCD1,MTMR11,FZD5,CA12,DPP4,MAP7,SGK2,MLXIPL,SLC16A4,LACTB2,ENTPD5,ENTPD8
Coexpression Atlas	ratio_EB-blastocyst_vs_EB-cbCD34_2500_K3	ratio_EmbryoidBody-blastocyst_vs_EmbryoidBody-derived-from_CD34-iPSC_top-relative-expression-ranked_2500_k-means-cluster#3	PCBC	1.6e-10	6.53e-07	2.88e-09	2.56e-08	37	385	CDX2,SLCO2B1,F2,MEP1A,TMEM132C,HAVCR1,SERPINA1,AFP,AGT,FGB,HRH2,PLG,VTN,TMEM253,MYO18A,APOA1,APOA2,APOB,SLC3A1,CIDEC,MTTP,URAD,PPP1R3G,ITIH2,GJB1,LCN15,EPS8L3,CREB3L3,SLC39A5,GNRH2,RBP4,TF,ORM1,MLXIPL,TM4SF4,CCDC183,CDH17
GO: Biological Process	GO:0006638	neutral lipid metabolic process		1.73e-10	1.16e-06	6.46e-08	6.07e-07	23	157	MGLL,SCD,ANG,MOGAT2,AGPAT2,APOA2,APOA4,APOB,CPT1A,LPIN3,CIDEC,MTTP,MOGAT3,DGAT1,ACSL5,SORL1,CIDEB,INSIG1,APOBR,LPGAT1,TCF7L2,NR1H3,SCARB1
Coexpression Atlas	gudmap_developingKidney_e15.5_cortic collect duct_1000_k5	DevelopingKidney_e15.5_cortic collect duct_emap-28132_k-means-cluster#5_top-relative-expression-ranked_1000	Gudmap Mouse MOE430.2	1.92e-10	7.8e-07	3.42e-09	3.04e-08	20	119	PHYKPL,AOC1,UGT8,RBM47,USP53,HKDC1,TMEM45B,OCLN,ATP1B1,PRSS8,GALNT3,MYO1D,MYO6,PAQR5,GJB1,NPNT,MAP7,TFRC,TMPRSS2,CDH16
Coexpression Atlas	gudmap_developingLowerUrinaryTract_e13.5_bladder neck-urethr epithel_1000_k1	DevelopingLowerUrinaryTract_e13.5_bladder neck-urethr epithel_emap-30875_k-means-cluster#1_top-relative-expression-ranked_1000	Gudmap Mouse MOE430.2	1.98e-10	8.06e-07	3.52e-09	3.13e-08	25	188	ERBB3,CYP2S1,F3,PLEKHH1,HPN,UGT8,PLS1,RNF186,SLC39A4,CLDN7,ZFP36,CCDC68,RASEF,OCLN,SORL1,ABHD3,RNF43,KLF5,MARVELD3,CA2,SLC27A2,MAP7,RASSF6,LRRC1,EPCAM
Coexpression Atlas	PCBC_MESO-5_blastocyst_1000	Progenitor-Cell-Biology-Consortium_induced-Mesoderm_fromBlastocyst-derived-humanEmbryonicStemCells_top-relative-expression-ranked_1000	PCBC	2.01e-10	8.16e-07	3.55e-09	3.15e-08	65	969	CNKSR1,B3GALT5,ZBED10P,FOXA3,HNF4A,MYORG,TFCP2L1,HPN,QPCT,VIL1,VIPR1,VIPR2,FA2H,CAMSAP3,APOA1,APOA2,APOB,CLDN3,FADS6,CLDN7,COL23A1,LSR,RHPN2,SLCO2A1,FRZB,FUT2,OCLN,MUC3A,TJP3,PRSS8,CYP27A1,GATM,PAQR5,KIF12,FAM83E,TNFRSF11A,ELOVL2,BMP2,TMEM92,PTPRJ,FZD5,COBL,MARVELD3,B4GALNT3,RAB25,KCNE3,RAB17,CECR2,GRIK3,MAP7,USH1C,NSUN7,GREM2,ACE2,USP2,ORM1,MLXIPL,ABCC6P1,SLC35A3,EFNA2,LLGL2,TMPRSS2,CCDC183,EPCA…
Coexpression	M534	KIM_LIVER_CANCER_POOR_SURVIVAL_DN	C2:CGP: Chemical and Genetic Perturbations	2.02e-10	1.94e-06	1.52e-08	1.48e-07	12	43	EPHX2,HNF4A,PLG,SERPINF2,MST1,ACSL5,IQGAP2,CYP27A1,GJB1,CRYL1,C1orf115,RNASE4
Coexpression Atlas	GSM854326_500	Myeloid Cells, MF.Microglia.CNS, CD45low CD11b+ F4/80+, Brain, avg-3	Immgen.org, GSE15907	2.09e-10	8.51e-07	3.68e-09	3.28e-08	38	407	HEXB,RGMB,TMEM144,HK2,SLCO2B1,MGAT4A,SERPINF1,TMEM176A,MGLL,GOLM1,KLF4,SQOR,CKB,MTUS1,RBM47,SELENOP,TMEM176B,ZFP36,ATF3,CTSS,IL6R,ABCC3,RAPGEF5,CYP27A1,GATM,SLC46A1,TNFRSF11A,GCNT1,PTAFR,SULT1A1,RCAN1,TCN2,CXCL16,TF,USP2,RNASE4,P4HA1,CD68
GO: Biological Process	GO:0010817	regulation of hormone levels		2.31e-10	1.56e-06	7.83e-08	7.36e-07	54	724	PCSK5,ENPP1,CYP2S1,F2,HNF4A,FAM3D,TTR,MEP1A,ADORA1,CAMK2N1,CLCN2,AFP,HPN,AGT,FGB,CCL5,SMPD3,ABCC2,DUOXA2,HSD17B7,DHRS11,DUOX2,SIRT6,CPT1A,IGF2,RAB11FIP5,ATP1A1,C1QTNF12,DGAT1,CYP3A5,CYP27A1,SRI,PDX1,RETSAT,GIPR,BMP2,BMP8B,NELL2,SULT1B1,SULT1A1,DPP4,HNF1A,TCF7L2,SRD5A3,RBP4,SLC17A4,PAPSS2,SYT7,SLC25A22,ACE2,SCARB1,PCSK6,SLC39A14,HSD17B11
Coexpression Atlas	gudmap_kidney_adult_Podocyte_MafB_1000	kidney_adult_Podocyte_MafB_top-relative-expression-ranked_1000	Gudmap Mouse MOE430.2	2.32e-10	9.44e-07	4.07e-09	3.62e-08	59	838	TSPAN15,PCSK5,MGAT4A,WIPF3,MGLL,ATP8B1,ST6GALNAC6,SQOR,HOXC6,CLIC5,PIK3CB,PRR13,OSBPL9,QPCT,PLOD2,VEGFA,SELENOP,ERO1A,FA2H,ANXA4,IFNGR1,AATK,SLCO2A1,TMEM37,IL6R,MYO1D,IQGAP2,MYO6,ERAP1,CYP27A1,STEAP2,TMBIM1,CEACAM1,GGH,PTPN3,NELL2,CDC42SE2,CHPT1,PTPRJ,SEMA3B,DIAPH2,RAB3B,MVP,NPNT,CA12,DPP4,P4HA2,TPPP,AHCYL2,TGFBR3,P2RX4,LACTB2,LRRC1,TSPAN8,PAK1,PAM,RORA,PRR15,TM4SF1
GO: Biological Process	GO:0007586	digestion		2.33e-10	1.57e-06	7.83e-08	7.36e-07	25	188	GCNT3,FABP1,NPC1L1,HRH2,ABCG2,PLS1,VIL1,MOGAT2,ISX,APOA1,APOA2,APOA4,MUC13,SLC22A5,MUC4,DGAT1,PRSS3,PBLD,SLC46A1,TCF7L2,RBP4,NR1H3,TFF2,TFF3,SCARB1
Coexpression Atlas	GSM854332_500	Myeloid Cells, Mo.6C-II-.BM, B220neg CD3neg CD115+ Ly-6C/Glo CD43+, Bone marrow, avg-3	Immgen.org, GSE15907	2.41e-10	9.8e-07	4.21e-09	3.74e-08	38	409	HK2,SERPINF1,ST6GALNAC6,KLF4,SQOR,PLAC8,S100A6,MTUS1,FCGRT,PLAUR,TMEM176B,GDA,PRKCD,MAPK3,CTSS,IL6R,NAAA,CYP27A1,NAGA,CEACAM1,PTPRJ,EGLN3,ADAP1,RCAN1,TCN2,GPR35,TF,LGALS3,TGFBR3,SLC16A3,RASA4,GUSB,SCARB1,SERPINB1,CD68,HSD17B11,PADI2,STOM
Coexpression Atlas	gudmap_developingLowerUrinaryTract_P1_bladder_B_1000_k4	DevelopingLowerUrinaryTract_P1_bladder_B_emap-30374_k-means-cluster#4_top-relative-expression-ranked_1000	Gudmap Mouse MOE430.2	2.42e-10	9.85e-07	4.21e-09	3.74e-08	19	108	F3,FAM3D,POF1B,TMC4,ZFP36,GDA,TMEM45B,RASEF,ABCC3,CEACAM1,SULT1A1,COBL,MARVELD3,RAB25,LAMC2,LGALS3,RASSF6,TSPAN8,SERPINB1
Coexpression Atlas	gudmap_developingLowerUrinaryTract_e15.5_ureteral tissue_100_k2	DevelopingLowerUrinaryTract_e15.5_ureteral tissue_emap-8234_k-means-cluster#2_top-relative-expression-ranked_100	Gudmap Mouse MOE430.2	2.58e-10	1.05e-06	4.48e-09	3.98e-08	14	54	FOXA3,TTR,FABP1,SERPINA1,AFP,FGB,ALDOB,VTN,APOA1,ITIH2,APOM,CA2,RBP4,TF
Coexpression	M45796	HE_LIM_SUN_FETAL_LUNG_C7_MID_SCHWANN_CELL	C8: Cell Type Signature	2.59e-10	2.49e-06	1.93e-08	1.88e-07	27	268	TSPAN15,ENPP2,TMEM176A,FCGRT,UGT8,TMEM176B,APOA1,PPARA,BHLHE40,AATK,PRKCD,IQGAP2,GATM,ITGB4,ITPR3,SEMA3B,COBL,ESPN,P4HA2,LAMA2,CXCL16,LGALS3,TGFBR3,CRYL1,PLLP,CLMN,SH3D19
GO: Biological Process	GO:0055085	transmembrane transport		2.62e-10	1.77e-06	8.41e-08	7.9e-07	99	1791	ERBB3,TMEM144,HK2,SLCO2B1,ENPP1,ATP8B1,F2,LRG1,S100A6,MELTF,CLCN2,CLIC5,HPN,AGT,SCNN1A,PLCB4,ABCG2,ABCC2,SLC51A,FXYD3,ERO1A,FLVCR1,CP,SLC39A4,TMC4,SIRT6,CPT1A,SLC1A1,ABCC6,SLC3A1,SLC51B,SLC6A8,SLC9A3,TRIB3,SLC15A1,SLC17A9,SLCO2A1,SLC22A5,TMEM37,PRKCD,SLC45A1,ATP1A1,OCLN,C1QTNF12,ATP1B1,FXYD2,ATP2A3,CTSS,ACSL5,ABCC3,ANO9,PRSS8,SLC36A1,SRI,SLC46A1,PTAFR,STEAP2,HEPH,SLC36A2,ITPR3,PTPN3,GJB1,DIAPH1,T…
Coexpression Atlas	Facebase_ST1_Univ_250	UniversalReference_WholeMouseP1_top-relative-expression-ranked_250	FaceBase_ST1	2.76e-10	1.12e-06	4.76e-09	4.23e-08	26	206	EPHX2,MGLL,F2,TTR,LRG1,FABP1,SERPINA1,FCGRT,AFP,AGT,FGB,PLG,ALDOB,VTN,APOA1,APOA2,APOA4,APOM,GJB1,CALML4,SLC27A2,RAB25,TF,LGALS3,LGALS4,TFF3
Coexpression Atlas	GSM538239_500	Myeloid Cells, DC.103-11b+.Lv, CD45+ CD11c+ MHC-II + CD11b high CD103-, Liver, avg-3	Immgen.org, GSE15907	2.77e-10	1.13e-06	4.76e-09	4.23e-08	38	411	HK2,HLA-DMA,TMEM176A,KLF4,SERPINA1,MTUS1,PLAUR,RBM47,SELENOP,TMEM176B,ANPEP,ANXA4,AOAH,BHLHE40,ZFP36,GDA,PLPP3,PRKCD,ATF3,CTSS,NAAA,CYP27A1,GATM,PTAFR,CFB,BMP2,PTPRJ,TCN2,ARRDC4,GPR35,CXCL16,TF,LGALS3,RSPO3,PAK1,CD68,NOSTRIN,STOM
Coexpression	M8905	GSE37301_CD4_TCELL_VS_RAG2_KO_NK_CELL_UP	C7:IMMUNESIGDB: ImmuneSigDB	2.89e-10	2.78e-06	2.14e-08	2.08e-07	21	163	RGMB,AOC1,B3GALT5,DSCAML1,MEP1A,SEMA6D,CCL5,PLCB4,PLOD2,ERO1A,SLC45A1,GCNT1,RNF43,TMBIM1,CALML4,EGLN3,GPX2,ATP10A,SLC16A4,SUSD2,RORA
Coexpression Atlas	kidney	kidney	Human Protein Atlas	3.3e-10	1.35e-06	5.65e-09	5.02e-08	33	323	HGD,CHDH,HNF4A,HAVCR1,TFCP2L1,HPN,AK4,ABCC2,ALDOB,GLTPD2,XPNPEP2,ABCC6,SLC3A1,LRRC19,FXYD2,GATM,PAQR5,KIF12,CDHR5,SLC36A2,GGT1,GGH,TINAG,CLRN3,SLC39A5,SLC27A2,CA12,DPEP1,HNF1A,AMN,ACE2,SLC16A4,CDH16
Coexpression Atlas	gudmap_developingKidney_e15.5_stage III -IV renal corpusc_500	DevelopingKidney_e15.5_stage III -IV renal corpusc_emap-27945_top-relative-expression-ranked_500	Gudmap Mouse MOE430.2	3.42e-10	1.39e-06	5.82e-09	5.17e-08	38	414	RGMB,MGAT4A,WIPF3,CARD10,MGLL,HNF4A,ADORA1,MFNG,CLIC5,PLAG1,ALDOB,VEGFA,FOXD2,TMEM37,C1QTNF12,FXYD2,CXADR,IQGAP2,GCHFR,GDNF,GGT1,CLRN3,SLC27A2,WSCD1,NDNF,DPP4,AMN,USH1C,ACE2,P2RX4,INF2,TSPAN8,RORA,PRR15,NOSTRIN,TM4SF1,CDH4,CDH16
Coexpression	M2157	DUTERTRE_ESTRADIOL_RESPONSE_24HR_DN	C2:CGP: Chemical and Genetic Perturbations	3.46e-10	3.33e-06	2.54e-08	2.48e-07	38	504	ACHE,MGAT4A,ME1,CAMK2N1,CGN,ABCG2,FBXO32,CORO2A,IFNGR1,TMEM45B,SLCO2A1,RASEF,ATP1B1,ABCC3,PRSS8,MYO6,SRI,HCAR1,CEACAM6,BCKDHB,KLF5,DIAPH2,TACC1,CPEB2,EGLN3,RCAN1,USP2,EFNA1,LMO7,KIAA1217,ARHGAP12,LRRC1,SERPINB1,TMPRSS2,PAM,ELF3,TM4SF1,PCDH1
Coexpression Atlas	PCBC_ratio_SC_vs_EB_1000	ratio_StemCell_vs_EmbryoidBody_top-relative-expression-ranked_1000	PCBC	3.78e-10	1.54e-06	6.4e-09	5.69e-08	65	984	CNKSR1,SYN3,RIMKLA,WIPF3,B3GALT5,CYP2S1,ZBED10P,FOXA3,TUBA4A,TFCP2L1,HOOK1,CGN,SCNN1A,UGT8,HRH2,CXCL5,PLS1,ALPG,VIL1,VIPR1,VIPR2,EPB41L4B,FA2H,FLVCR1,CLDN7,VSIG10,LSR,IGSF1,OCLN,MUC3A,MUC4,SORL1,ANO9,CYP2B6,PRSS8,ARHGAP26,FAM83E,TNFRSF11A,PTAFR,STEAP2,TRIM14,ITPR3,NR1I2,FZD5,DIAPH2,COBL,MARVELD3,B4GALNT3,SLC27A2,RAB17,TCN2,TMT1B,OAS3,B3GNT7,MAP7,HHLA2,MLXIPL,LLGL2,TMPRSS2,CDA,SLC39A14,LY75,ARHGAP…
Coexpression	M34009	BLANCO_MELO_RESPIRATORY_SYNCYTIAL_VIRUS_INFECTION_A594_CELLS_DN	C2:CGP: Chemical and Genetic Perturbations	3.82e-10	3.68e-06	2.79e-08	2.72e-07	18	119	HLA-DMB,DEGS2,SERPINF2,CLDN3,SEMA4G,SLC3A1,DOK4,CIDEC,TMEM37,TJP3,MYO1A,KIF12,ANKS4B,EPS8L3,USH1C,LLGL2,PADI2,CDH17
Coexpression Atlas	gudmap_developingLowerUrinaryTract_e15.5_ureteral tissue_1000	DevelopingLowerUrinaryTract_e15.5_ureteral tissue_emap-8234_top-relative-expression-ranked_1000	Gudmap Mouse MOE430.2	3.86e-10	1.57e-06	6.52e-09	5.8e-08	57	805	HGD,TLCD4,LDOC1,KLF4,FOXA3,F2,HNF4A,TTR,TUBA4A,POF1B,FABP1,SERPINA1,HOXD1,PIK3CB,AFP,HPN,FGB,PLG,SERPINF2,ALDOB,VTN,ANXA4,DHRS11,SLC39A4,APOA1,XK,APOA2,APOB,COL23A1,MST1,IGF2,PNMA2,MTTP,IGSF1,IL2RG,MASP1,CYP3A5,CDHR2,ISG20,ACSS2,GDNF,ITIH2,SLC36A2,APOM,COBL,CA2,SLC27A2,RBP4,TF,LGALS3,PNPO,TFRC,SGK2,LACTB2,TSPAN8,SERPINB1,TMPRSS2
Coexpression Atlas	gudmap_developingLowerUrinaryTract_e15.5_ureteral tissue_1000_k4	DevelopingLowerUrinaryTract_e15.5_ureteral tissue_emap-8234_k-means-cluster#4_top-relative-expression-ranked_1000	Gudmap Mouse MOE430.2	3.94e-10	1.6e-06	6.62e-09	5.89e-08	36	379	HGD,LDOC1,FOXA3,F2,HNF4A,TTR,FABP1,SERPINA1,AFP,HPN,FGB,PLG,SERPINF2,ALDOB,VTN,DHRS11,APOA1,APOA2,APOB,MTTP,IGSF1,IL2RG,MASP1,CDHR2,ISG20,ITIH2,SLC36A2,APOM,COBL,CA2,SLC27A2,RBP4,TF,PNPO,TFRC,SGK2
Coexpression	M4938	GSE29618_BCELL_VS_MONOCYTE_DN	C7:IMMUNESIGDB: ImmuneSigDB	4.12e-10	3.96e-06	2.98e-08	2.9e-07	23	200	PCSK5,KLF4,SQOR,S100A6,QPCT,PLAUR,RBM47,VEGFA,AOAH,IFNGR1,CTSS,NAGA,PTAFR,ITGB2,MTMR11,CALML4,DPYSL2,TCF7L2,PAK1,CD68,CDA,HSD17B11,STOM
Coexpression	M45710	HE_LIM_SUN_FETAL_LUNG_C1_PROXIMAL_SECRETORY_PROGENITORS_CELL	C8: Cell Type Signature	4.42e-10	4.26e-06	3.16e-08	3.08e-07	19	135	PFKP,SERPINA1,MUC20,TMPRSS4,CP,BHLHE40,BRINP2,ATP2A3,SOD3,PAG1,TNFSF10,CEACAM6,ISG20,TRIM14,ITGB4,ITIH2,NPNT,SLC44A4,PAPSS2
Coexpression	M40868	ZAK_PBMC_MRKAD5_HIV_1_GAG_POL_NEF_AGE_20_50YO_1DY_UP	C7:VAX: HIPC Vaccine Response	4.43e-10	4.27e-06	3.16e-08	3.08e-07	58	1012	HK2,HLA-DMA,HLA-DMB,TMEM176A,GOLM1,KLF4,SQOR,PLAC8,SERPINA1,HRH2,PLAUR,RBM47,TMEM176B,ANXA4,AOAH,ZFP36,FAR2,NT5C2,PRKCD,ATF3,CTNNA1,ARHGAP27,ATP1B1,NAAA,GALNT3,TNFSF10,NAGA,IRF1,GBP3,IRF7,ISG20,GCNT1,ACSS2,TRIM14,APOBR,CFB,CEACAM1,DIAPH2,ATP11A,CALML4,MVP,TMEM150B,DPYSL2,TCF7L2,TCN2,GPR35,OAS3,NR1H3,CXCL16,LGALS9,P2RX4,SLC16A3,PAK1,CD68,PAM,CD151,MXD1,STOM
GO: Cellular Component	GO:0098858	actin-based cell projection		4.44e-10	2.78e-07	1.85e-08	1.3e-07	31	292	CEACAM5,CEACAM7,ATP8B1,CLIC5,MUC17,PLS1,MUC20,VIL1,MTTP,CTNNA1,MUC4,CXADR,MYO1A,MYO1D,IQGAP2,MYO6,MYO7B,CDHR2,CEACAM6,CDHR5,ANKS4B,CEACAM1,PTPRH,CA2,ESPN,KIF13B,DPEP1,AMN,SLC26A2,USH1C,SCARB1
Coexpression Atlas	gudmap_developingLowerUrinaryTract_P1_ureter_1000_k5	DevelopingLowerUrinaryTract_P1_ureter_emap-30363_k-means-cluster#5_top-relative-expression-ranked_1000	Gudmap Mouse MOE430.2	4.56e-10	1.86e-06	7.64e-09	6.79e-08	21	138	GCNT3,TLCD4,LDOC1,ME1,TTR,S100A6,DEGS2,FXYD3,RBM47,FA2H,ANXA4,RAB11FIP5,SDCBP2,PAQR5,SLC27A2,DPP4,RBP4,GLB1L2,TF,ACE2,TMPRSS2
Coexpression Atlas	Facebase_RNAseq_e10.5_Olfactory Pit_1000_K1	FacebaseRNAseq_e10.5_Olfactory Pit_top-relative-expression-ranked_1000_k-means-cluster#1	FaceBase_RNAseq	4.66e-10	1.9e-06	7.78e-09	6.91e-08	29	259	ERBB3,MTUS1,CGN,PLS1,TMEM176B,CAMSAP3,SGPP2,PRR15L,CLDN3,CLDN7,CDCP1,RHPN2,CCDC68,RASEF,ACSL5,TTC39B,PRSS8,SPOCK2,KLF5,TMEM163,SLC27A2,NPNT,RAB25,MAP7,PAPSS2,GREM2,LLGL2,LMO7,EPCAM
Coexpression	M126	KIM_RESPONSE_TO_TSA_AND_DECITABINE_UP	C2:CGP: Chemical and Genetic Perturbations	5.03e-10	4.84e-06	3.56e-08	3.47e-07	19	136	SERPINF1,HNF4G,SMPD3,CLDN7,MUC13,CDCP1,SLC6A8,ATF3,MUC1,CXADR,CYP3A5,IRF7,GCHFR,ISG20,NR1I2,SLC27A2,LAMC2,MAP7,CDA
Coexpression Atlas	gudmap_developingLowerUrinaryTract_e13.5_bladder neck-urethr epithel_500	DevelopingLowerUrinaryTract_e13.5_bladder neck-urethr epithel_emap-30875_top-relative-expression-ranked_500	Gudmap Mouse MOE430.2	5.06e-10	2.06e-06	8.41e-09	7.48e-08	37	401	ERBB3,PLCXD1,KLF4,F3,POF1B,PLEKHH1,HOXD1,PIK3CB,FXYD3,CXCL14,SLC39A4,TMC4,CLDN3,CLDN7,CDCP1,BHLHE40,ZFP36,SLCO2A1,CCDC68,RASEF,ATF3,OCLN,MCTP2,CXADR,SORL1,RNF43,KLF5,MARVELD3,SLC27A2,TRIM2,LAMC2,MAP7,LGALS3,RASSF6,LRRC1,TSPAN8,TMPRSS2
Coexpression Atlas	PCBC_EB_fibroblast_500	Progenitor-Cell-Biology-Consortium_EmbryoidBody_from_inducedPluripotentialStemCells_derived from_from_fibroblast_top-relative-expression-ranked_500	PCBC	5.11e-10	2.08e-06	8.46e-09	7.52e-08	42	497	CDX2,TMEM176A,F2,TTR,FABP1,MEP1A,TMEM132C,HAVCR1,SERPINA1,HOXC6,AFP,AGT,FGB,PLG,VTN,TMEM176B,UBD,CXCL14,APOA1,APOA2,POU4F1,APOA4,APOB,IGF2,FRZB,MTTP,URAD,GDNF,ITIH2,LCN15,SLC39A5,GNRH2,NPNT,RBP4,USH1C,TF,GREM2,ORM1,TM4SF4,TMPRSS2,RSPO1,CDH17
Coexpression	M2669	AKT_UP.V1_UP	C6: Oncogenic Signature	5.68e-10	5.47e-06	3.99e-08	3.89e-07	21	169	TLCD4,PFKP,ST6GALNAC6,LRG1,UGT8,AK4,ERO1A,TMPRSS4,ATF3,TJP3,GDPD2,PTPRJ,VILL,KCNE3,GPX2,CXCL16,TFRC,CLMN,GUSB,PAK1,SLC6A14
Coexpression	M34007	BLANCO_MELO_HUMAN_PARAINFLUENZA_VIRUS_3_INFECTION_A594_CELLS_DN	C2:CGP: Chemical and Genetic Perturbations	5.8e-10	5.58e-06	4.05e-08	3.94e-07	18	122	HLA-DMA,HLA-DMB,DEGS2,SERPINF2,FOXD2,CAMSAP3,LMNTD2,CLDN3,ABCC6,TMEM37,TJP3,MYO1A,KIF12,ANKS4B,GPR35,USH1C,LGALS4,LLGL2
Coexpression Atlas	gudmap_developingKidney_e15.5_stage III -IV renal corpusc_1000	DevelopingKidney_e15.5_stage III -IV renal corpusc_emap-27945_top-relative-expression-ranked_1000	Gudmap Mouse MOE430.2	6.08e-10	2.48e-06	1e-08	8.91e-08	58	837	RGMB,MGAT4A,WIPF3,CARD10,MGLL,HNF4A,ADORA1,MFNG,CAMK2N1,CLIC5,AFP,PLAG1,ALDOB,VEGFA,FOXD2,SLC3A1,SLCO2A1,TMEM37,C1QTNF12,FXYD2,IL2RG,CXADR,MYO1D,IQGAP2,CDHR2,KIF12,GCHFR,ANKS4B,GDNF,GGT1,CEACAM1,ITPR3,APOM,CLRN3,SEMA3B,TTC22,RAB3B,SLC39A5,SLC27A2,WSCD1,NDNF,DPP4,AMN,USH1C,RGS3,TFRC,ACE2,EFNA1,P2RX4,INF2,TSPAN8,RORA,CD151,PRR15,NOSTRIN,TM4SF1,CDH4,CDH16
Coexpression Atlas	gudmap_developingKidney_e14.5 whole kidney - wildtype_200_k4	DevelopingKidney_e14.5 whole kidney - wildtype_emap-6674_k-means-cluster#4_top-relative-expression-ranked_200	Gudmap Mouse MOE430.2	6.25e-10	2.54e-06	1.03e-08	9.11e-08	13	48	HNF4A,MEP1A,AFP,ALDOB,ANG,FXYD2,CIDEB,GGT1,TINAG,CALML4,SLC39A5,AMN,ACE2
Coexpression	M8976	WATANABE_COLON_CANCER_MSI_VS_MSS_DN	C2:CGP: Chemical and Genetic Perturbations	6.39e-10	6.15e-06	4.42e-08	4.31e-07	14	69	FABP1,MUC20,USP53,ISX,DUOX2,CXCL14,IGF2,CADPS,CYP2B6,SLC39A5,SLC26A3,SLC26A2,MUC12,ACE2
Coexpression Atlas	gudmap_developingLowerUrinaryTract_e15.5_ureteral tissue_500_k2	DevelopingLowerUrinaryTract_e15.5_ureteral tissue_emap-8234_k-means-cluster#2_top-relative-expression-ranked_500	Gudmap Mouse MOE430.2	6.39e-10	2.6e-06	1.05e-08	9.29e-08	28	246	HGD,LDOC1,FOXA3,F2,HNF4A,TTR,FABP1,SERPINA1,AFP,FGB,PLG,SERPINF2,ALDOB,VTN,APOA1,APOA2,APOB,IGF2,ISG20,ITIH2,SLC36A2,APOM,CA2,SLC27A2,RBP4,TF,PNPO,SGK2
GO: Cellular Component	GO:0031012	extracellular matrix		6.56e-10	4.1e-07	2.56e-08	1.8e-07	50	665	ACHE,SERPINF1,F2,F3,S100A6,SERPINA1,SEMA6D,MUC17,AGT,FGB,MMP7,PLG,SERPINF2,VEGFA,VTN,ANG,ANXA4,APOA1,APOA4,HAPLN1,COL23A1,MST1,IGF2,MUC1,MUC4,CTSS,SOD3,PRSS3,SPOCK2,ITGB4,ITIH2,TINAG,SEMA3B,DMBT1,NPNT,NDNF,INHBE,LAMA2,LAMC2,TF,LGALS3,TNFRSF11B,LGALS4,LGALS9,TGFBR3,ORM1,PCSK6,SERPINB1,CD151,SERPINA5
Coexpression	M1951	MEISSNER_NPC_HCP_WITH_H3K4ME2	C2:CGP: Chemical and Genetic Perturbations	6.73e-10	6.48e-06	4.63e-08	4.51e-07	37	493	RIMKLA,ACHE,TLCD4,CARD10,GOLGA7B,PLS1,LRRC75A,VIPR2,SEMA4B,FA2H,CAMSAP3,KIF16B,XK,COL23A1,LSR,GDA,AATK,SPOCK2,TRIM14,ELOVL2,ITPKA,ITPR3,LPGAT1,SLC27A2,ESPN,RBP4,GALNT12,MAP7,NSUN7,USP2,MLXIPL,SLC44A1,EFNA2,LLGL2,KIAA1217,LY75,EPCAM
GO: Cellular Component	GO:0030312	external encapsulating structure		7.27e-10	4.55e-07	2.67e-08	1.88e-07	50	667	ACHE,SERPINF1,F2,F3,S100A6,SERPINA1,SEMA6D,MUC17,AGT,FGB,MMP7,PLG,SERPINF2,VEGFA,VTN,ANG,ANXA4,APOA1,APOA4,HAPLN1,COL23A1,MST1,IGF2,MUC1,MUC4,CTSS,SOD3,PRSS3,SPOCK2,ITGB4,ITIH2,TINAG,SEMA3B,DMBT1,NPNT,NDNF,INHBE,LAMA2,LAMC2,TF,LGALS3,TNFRSF11B,LGALS4,LGALS9,TGFBR3,ORM1,PCSK6,SERPINB1,CD151,SERPINA5
Coexpression Atlas	GSM605868_500	Myeloid Cells, Mo.6C+II+.Bl, CD115+ B220- CD43+ Ly6C+ MHCIIint, Blood, avg-4	Immgen.org, GSE15907	8.2e-10	3.34e-06	1.34e-08	1.19e-07	37	408	HK2,HLA-DMA,TMEM176A,KLF4,SQOR,PLAC8,S100A6,MTUS1,PLAUR,RBM47,TMEM176B,FLVCR1,AOAH,GDA,PRKCD,ATF3,CTSS,IL6R,NAAA,CYP27A1,IRF7,PTAFR,CFB,CEACAM1,PTPRJ,KCNE3,ADAP1,GPR35,OAS3,TF,LGALS3,SLC16A3,RASA4,SCARB1,CD68,NOSTRIN,STOM
Coexpression Atlas	Arv_SC-HD_1000_K2	AravindRamakr_StemCell-HD_top-relative-expression-ranked_1000_k-means-cluster#2	PCBC	8.45e-10	3.44e-06	1.37e-08	1.22e-07	20	129	CEACAM5,GCNT3,HLA-DMB,FAM3D,CCL20,FXYD3,EPB41L4B,TMPRSS4,GDA,MISP,TMEM45B,C15orf48,RASEF,IL2RG,FAM83E,CEACAM6,RAB25,LINC01559,GPX2,MALRD1
Coexpression Atlas	gudmap_developingLowerUrinaryTract_P1_ureter_500	DevelopingLowerUrinaryTract_P1_ureter_emap-30363_top-relative-expression-ranked_500	Gudmap Mouse MOE430.2	8.62e-10	3.51e-06	1.39e-08	1.24e-07	36	390	RGMB,GCNT3,SLCO2B1,ENPP1,TLCD4,MGAT4A,MGLL,ATP8B1,F3,TTR,POF1B,S100A6,DEGS2,FXYD3,ALDOB,RBM47,ANXA4,CP,CPT1A,TMEM45B,RAB11FIP5,ATF3,PRDM16,ABCC3,PAQR5,CFB,DPEP1,RBP4,TPPP,TF,LGALS3,TNFRSF11B,SLC44A1,TSPAN8,TMPRSS2,TM4SF1
Coexpression Atlas	Facebase_RNAseq_e9.5_Olfactory Placode_1000_K3	FacebaseRNAseq_e9.5_Olfactory Placode_top-relative-expression-ranked_1000_k-means-cluster#3	FaceBase_RNAseq	8.81e-10	3.58e-06	1.42e-08	1.26e-07	30	283	ERBB3,HLA-DMA,CGN,PLS1,TMEM176B,CAMSAP3,SGPP2,CLDN3,CLDN7,CDCP1,RHPN2,CCDC68,RASEF,ACSL5,TTC39B,PRSS8,SPOCK2,BMP2,KLF5,TMEM163,SLC27A2,NPNT,RAB25,MAP7,PAPSS2,GREM2,LLGL2,LMO7,KIAA1217,EPCAM
Coexpression Atlas	Facebase_RNAseq_e9.5_Olfactory Placode_2500_K5	FacebaseRNAseq_e9.5_Olfactory Placode_top-relative-expression-ranked_2500_k-means-cluster#5	FaceBase_RNAseq	9.25e-10	3.76e-06	1.48e-08	1.32e-07	36	391	ERBB3,MGAT4A,CGN,FXYD3,PLS1,LRRC75A,CAMSAP3,SGPP2,CLDN3,CLDN7,CDCP1,CLSTN1,RHPN2,CCDC68,RASEF,ACSL5,TTC39B,PRSS8,MYO1D,SPOCK2,BMP2,KLF5,TMEM163,SLC27A2,NPNT,RAB25,MAP7,PAPSS2,GREM2,SLC44A1,LLGL2,LMO7,KIAA1217,PCSK6,ENTPD5,EPCAM
GO: Biological Process	GO:0000041	transition metal ion transport		9.77e-10	6.58e-06	2.99e-07	2.81e-06	19	116	HAVCR1,MELTF,ABCC2,FLVCR1,CP,SLC39A4,SLC1A1,SLC46A1,STEAP2,HEPH,TMEM163,SLC39A5,SLC11A2,TCN1,TCN2,TF,TFRC,SFXN1,SLC39A14
Coexpression Atlas	gudmap_RNAseq_p2_Glomerlular Endothelial_2500_K4	gudmap_RNAseq_p2_Glomerlular Endothelial_2500_K4	Gudmap RNAseq	9.91e-10	4.03e-06	1.58e-08	1.41e-07	36	392	TSPAN15,ACHE,TMEM176A,CKB,NDRG1,FCGRT,CP,ZFP36,TXNIP,AATK,SLCO2A1,TMEM37,PCP4L1,ATP2A3,IL2RG,MYO1D,ERAP1,IRF1,IRF7,RILP,TRIM14,CFB,TACC1,CALML4,MVP,TCN2,CXCL16,LGALS9,EVA1B,P2RX4,LMO7,SERPINB1,CD151,NOSTRIN,TM4SF1,PCDH1
Coexpression Atlas	GSM605872_500	Myeloid Cells, Mo.6C+II-.Bl, Cd115+ B220- CD43+ Ly6C+ MHCII-, Blood, avg-3	Immgen.org, GSE15907	1.01e-09	4.09e-06	1.6e-08	1.42e-07	37	411	HK2,SQOR,PLAC8,S100A6,AP2A2,MTUS1,PLAUR,RBM47,FLVCR1,AOAH,GDA,PRKCD,ATF3,CTSS,IL6R,SORL1,NAAA,ARHGAP26,CYP27A1,IRF7,PTAFR,CEACAM1,GGH,PTPRJ,DIAPH2,ATP11A,TMEM150B,ADAP1,TCN2,ARRDC4,OAS3,PAPSS2,TF,LGALS3,SCARB1,CD68,STOM
Coexpression	M19993	HUTTMANN_B_CLL_POOR_SURVIVAL_UP	C2:CGP: Chemical and Genetic Perturbations	1.02e-09	9.82e-06	6.96e-08	6.79e-07	27	285	CNKSR1,SERPINF1,LDOC1,HPCAL1,ANG,FA2H,CPT1A,PLPP3,PNMA2,PRKCSH,ATP2A3,IL6R,PRSS3,GATM,IRF7,CEACAM1,DIAPH1,ATP11A,EGLN3,DPYSL2,TRIM2,RHOT2,PTPN18,TGFBR3,RNASE4,SLC16A3,PAK1
Coexpression	M2240	JOHNSTONE_PARVB_TARGETS_3_UP	C2:CGP: Chemical and Genetic Perturbations	1.05e-09	1.01e-05	7.09e-08	6.91e-07	34	433	HLA-DMA,KLF4,ABHD17C,MELTF,HPCAL1,SCD,SCNN1A,ABCG2,SNHG29,RBM47,VIPR1,SEMA4B,FLNB,ANXA4,MYO18A,CDCP1,BHLHE40,TXNIP,PNMA2,ATP1A1,STX16,CTSS,ACSL5,ABCC3,TNFSF10,ARHGAP26,TMEM135,RETSAT,ITGB4,DMBT1,MVP,CA12,NR1H3,EPCAM
Coexpression	M2634	EGFR_UP.V1_UP	C6: Oncogenic Signature	1.06e-09	1.02e-05	7.09e-08	6.91e-07	22	192	HK2,ENPP1,MGAT4A,MGLL,KLF4,SQOR,FGB,ERO1A,SLCO2A1,NT5C2,CCDC68,ATF3,CXADR,ABCC3,CEACAM6,IRF1,ISG20,GCNT1,EGLN3,RCAN1,PAPSS2,TNFRSF11B
Coexpression	M45715	HE_LIM_SUN_FETAL_LUNG_C1_SQUAMOUS_CELL	C8: Cell Type Signature	1.07e-09	1.03e-05	7.09e-08	6.91e-07	26	266	ABO,GCNT3,ACHE,MGLL,F3,FAM3D,PLAC8,CAMK2N1,SCNN1A,FBXO32,MUC20,TMPRSS4,C15orf48,ARHGAP27,RNF39,SDCBP2,MUC4,TNFSF10,CEACAM6,GBP3,AMN,SRD5A3,ARRDC4,LGALS9,CD68,TM4SF1
Coexpression	M1286	HOSHIDA_LIVER_CANCER_SUBCLASS_S3	C2:CGP: Chemical and Genetic Perturbations	1.07e-09	1.03e-05	7.09e-08	6.91e-07	26	266	HGD,AOC1,F2,FGB,PLG,ALDOB,SELENOP,CP,APOA1,ABCC6,SLCO2A1,ASL,IL6R,SORL1,IQGAP2,CYP27A1,GCHFR,CFB,GGH,GJB1,CA2,GPX2,GPX3,PAPSS2,TGFBR3,RNASE4
Coexpression Atlas	gudmap_kidney_P4_CapMesRenVes_Crym_1000	kidney_P4_CapMesRenVes_Crym_top-relative-expression-ranked_1000	Gudmap Mouse MOE430.2	1.07e-09	4.35e-06	1.69e-08	1.51e-07	55	783	TSPAN15,HLA-DMB,ENPP2,MGAT4A,MGLL,TUBA4A,MEP1A,ADORA1,TFCP2L1,HOXC6,HOOK1,PCDH19,RBM47,PLS1,SGPP2,CXCL14,CLDN7,TMEM37,OCLN,C1QTNF12,PRDM16,PRSS8,MYO6,KIF12,GCNT1,ANKS4B,STEAP2,HEPH,GGT1,BMP2,PTPN3,NELL2,PTPRJ,B4GALNT3,NPNT,CA12,NDNF,DPP4,TRIM2,CECR2,LAMC2,MAP7,PAPSS2,TFRC,KIAA1217,TSPAN8,LRP4,TMPRSS2,PRR15,LY75,EPCAM,RSPO1,CDH4,CDH16,STOM
Coexpression Atlas	gudmap_developingKidney_e15.5_S-shaped body_100	DevelopingKidney_e15.5_S-shaped body_emap-27855_top-relative-expression-ranked_100	Gudmap Mouse MOE430.2	1.08e-09	4.39e-06	1.7e-08	1.51e-07	16	81	HNF4A,CLIC5,ALDOB,RBM47,SGPP2,KIF12,GGT1,APOM,TINAG,NDNF,DPP4,AMN,TSPAN8,PRR15,CDH4,CDH16
Coexpression Atlas	Arv_SC_fibroblast_2500_K1	AravindRamakr_StemCell_from_inducedPluripotentialStemCells_derived from_from_fibroblast_top-relative-expression-ranked_2500_k-means-cluster#1	PCBC	1.14e-09	4.64e-06	1.79e-08	1.59e-07	32	321	CEACAM5,GCNT3,CEACAM7,FAM3D,POF1B,CCL20,FXYD3,EPB41L4B,CORO2A,PRR15L,HKDC1,TMPRSS4,CLDN7,GDA,MISP,TMEM45B,C15orf48,RASEF,FUT2,SDCBP2,PRSS3,PRSS8,CYP3A5,FAM83E,CEACAM6,RAB25,LINC01559,AMN,GPX2,TRIM31,RNF183,ABCC6P1
Coexpression Atlas	gudmap_developingKidney_e15.5_Medullary collecting duct_500_k2	DevelopingKidney_e15.5_Medullary collecting duct_emap-28063_k-means-cluster#2_top-relative-expression-ranked_500	Gudmap Mouse MOE430.2	1.15e-09	4.69e-06	1.81e-08	1.61e-07	17	93	CNKSR1,GCNT3,PLAC8,TFCP2L1,HOXD1,UGT8,SGPP2,TMC4,CLDN3,CLDN7,OCLN,PRDM16,TJP3,MARVELD3,NPNT,EPCAM,PADI2
Coexpression	M18855	VECCHI_GASTRIC_CANCER_EARLY_UP	C2:CGP: Chemical and Genetic Perturbations	1.19e-09	1.14e-05	7.82e-08	7.62e-07	34	435	PFKP,TUBA4A,S100A6,MELTF,HOXC6,CAMK2N1,FBXO32,MMP7,CXCL5,SEMA4B,TMPRSS4,SLC39A4,CLDN3,CLDN7,MUC13,SLC6A8,FAR2,TMEM45B,MUC3A,ATP10B,GGH,CLRN3,KLF5,ATP11A,CALML4,MARVELD3,KCNE3,TRIM31,LAMC2,EFNA2,LACTB2,GUCY2C,TM4SF1,CDH17
GO: Cellular Component	GO:0012506	vesicle membrane		1.21e-09	7.59e-07	4.21e-08	2.96e-07	78	1324	TSPAN15,SYN3,HLA-DMA,HLA-DMB,SNAP47,ABHD17C,NDRG1,AP2A2,FCGRT,NPC1L1,OSBPL9,PLAUR,FER1L5,BAIAP2L2,ANPEP,ANXA4,AGPAT2,SH3KBP1,KIF16B,SLC39A4,APOB,SLC1A1,ZFYVE28,SLC9A3,TMEM45B,SLC17A9,CADPS,RAB11FIP5,STX16,MCTP2,DGAT1,SORL1,CIDEB,SPIRE2,IQGAP2,MYO6,SRI,CEACAM6,GBP3,ATP10B,IRF7,SLC46A1,RILP,PTAFR,STEAP2,ITGB2,TMBIM1,SLC36A2,CEACAM1,ITPR3,PTPRJ,FZD5,DIAPH1,TMEM163,ATP11A,DMBT1,RAB3B,SLC27A2,TMEM150B…
Coexpression	MM830	MEISSNER_NPC_HCP_WITH_H3K4ME2	M2:CGP: Chemical and Genetic Perturbations	1.23e-09	1.19e-05	8.05e-08	7.85e-07	37	504	RIMKLA,ACHE,TLCD4,CARD10,GOLGA7B,PLS1,LRRC75A,VIPR2,SEMA4B,FA2H,CAMSAP3,KIF16B,XK,COL23A1,LSR,GDA,AATK,SPOCK2,TRIM14,ELOVL2,ITPKA,ITPR3,LPGAT1,SLC27A2,ESPN,RBP4,GALNT12,MAP7,NSUN7,USP2,MLXIPL,SLC44A1,EFNA2,LLGL2,KIAA1217,LY75,EPCAM
Coexpression Atlas	GSM854271_500	Myeloid Cells, DC.103-11b+24-.Lu, MHCII+ CD11c+ CD103- CD11b+ CD24-, Lung, avg-2	Immgen.org, GSE15907	1.23e-09	5e-06	1.92e-08	1.7e-07	37	414	HEXB,HLA-DMA,SLCO2B1,TMEM176A,KLF4,CKB,CCL5,PLAUR,RBM47,SELENOP,TMEM176B,ANPEP,ANXA4,AOAH,BHLHE40,ZFP36,GDA,ATF3,CTSS,ABCC3,NAAA,TNFSF9,CYP27A1,GATM,TNFRSF11A,PTAFR,TMBIM1,PTPRJ,RCAN1,CXCL16,TF,LGALS3,RASA4,PAK1,CD68,NOSTRIN,STOM
Coexpression	M19097	SWEET_LUNG_CANCER_KRAS_UP	C2:CGP: Chemical and Genetic Perturbations	1.24e-09	1.19e-05	8.05e-08	7.85e-07	36	481	HK2,HLA-DMA,HLA-DMB,TLCD4,GOLM1,ME1,F3,LRG1,TFCP2L1,HOXD1,SCD,HPN,VIL1,KIAA1522,ANXA4,CLDN3,CLDN7,BHLHE40,ATP1A1,MUC1,CTSS,ACSL5,GALNT3,TNFSF9,ITGB2,CEACAM1,KLF5,ATP11A,RBP4,LAMC2,LGALS3,ACE2,TSPAN8,CD68,LY75,EPCAM
Coexpression Atlas	PCBC_SC_blastocyst_1000	Progenitor-Cell-Biology-Consortium_StemCell_fromBlastocyst-derived-humanEmbryonicStemCells_top-relative-expression-ranked_1000	PCBC	1.4e-09	5.68e-06	2.17e-08	1.93e-07	64	993	SYN3,RIMKLA,WIPF3,B3GALT5,CYP2S1,FOXA3,HPN,CGN,SCNN1A,UGT8,RBM47,CXCL5,LRRC75A,ALPG,VIL1,VIPR2,EPB41L4B,TMEM253,CLDN3,CLDN7,CDCP1,LSR,GDA,C1orf226,RHPN2,RASEF,IGSF1,OCLN,MUC3A,CXADR,TJP3,CYP2B6,SPIRE2,PRSS8,GALNT3,KIF12,GDPD2,TNFRSF11A,STEAP2,NELL2,TMEM92,FZD5,COBL,MARVELD3,B4GALNT3,SLC27A2,ESPN,EGLN3,INHBE,RAB25,RAB17,CECR2,SLC19A3,B3GNT7,MAP7,SLC44A4,USH1C,NSUN7,ORM1,HHLA2,MLXIPL,LLGL2,TMPRSS2,…
GO: Cellular Component	GO:0030659	cytoplasmic vesicle membrane		1.42e-09	8.86e-07	4.66e-08	3.27e-07	77	1304	TSPAN15,SYN3,HLA-DMA,HLA-DMB,SNAP47,ABHD17C,NDRG1,AP2A2,FCGRT,NPC1L1,OSBPL9,PLAUR,FER1L5,BAIAP2L2,ANPEP,AGPAT2,SH3KBP1,KIF16B,SLC39A4,APOB,SLC1A1,ZFYVE28,SLC9A3,TMEM45B,SLC17A9,CADPS,RAB11FIP5,STX16,MCTP2,DGAT1,SORL1,CIDEB,SPIRE2,IQGAP2,MYO6,SRI,CEACAM6,GBP3,ATP10B,IRF7,SLC46A1,RILP,PTAFR,STEAP2,ITGB2,TMBIM1,SLC36A2,CEACAM1,ITPR3,PTPRJ,FZD5,DIAPH1,TMEM163,ATP11A,DMBT1,RAB3B,SLC27A2,TMEM150B,STBD1…
Coexpression	M39303	CUI_DEVELOPING_HEART_C6_EPICARDIAL_CELL	C8: Cell Type Signature	1.42e-09	1.37e-05	9.19e-08	8.96e-07	22	195	TMEM176A,S100A6,CGN,SMPD3,PLOD2,VTN,TMEM176B,ANXA4,PRR15L,MST1,TMEM37,CXADR,SPOCK2,CFB,SEMA3B,NPNT,PAPSS2,TSPAN3,PLLP,RNASE4,PRR15,TM4SF1
Coexpression Atlas	gudmap_kidney_adult_RenalCapsule_k3_1000	kidney_adult_RenalCapsule_k-means-cluster#3_top-relative-expression-ranked_1000	Gudmap Mouse MOE430.2	1.57e-09	6.41e-06	2.44e-08	2.17e-07	16	83	HEXB,TMEM176A,PFKP,SQOR,NDRG1,SELENOP,TMEM176B,ANPEP,GCNT1,CALML4,SLC27A2,GPX3,CXCL16,PAPSS2,SLC16A4,SUSD2
Coexpression Atlas	gudmap_developingKidney_e11.5_ureteric bud_200	DevelopingKidney_e11.5_ureteric bud_emap-3844_top-relative-expression-ranked_200	Gudmap Mouse MOE430.2	1.63e-09	6.62e-06	2.51e-08	2.23e-07	22	162	CNKSR1,ERBB3,GCNT3,PLCXD1,LDOC1,TFCP2L1,HOXD1,HPN,SGPP2,CLDN3,CLDN7,CDCP1,HAPLN1,OCLN,PRDM16,PRSS8,KIF12,RNF43,PTPN3,DPP4,PADI2,CDH16
GO: Biological Process	GO:0042445	hormone metabolic process		1.69e-09	1.14e-05	4.72e-07	4.44e-06	31	306	PCSK5,ENPP1,CYP2S1,TTR,MEP1A,CLCN2,AFP,HPN,AGT,DUOXA2,HSD17B7,DHRS11,DUOX2,IGF2,ATP1A1,DGAT1,CYP3A5,CYP27A1,RETSAT,BMP2,SULT1B1,SULT1A1,DPP4,TCF7L2,SRD5A3,RBP4,PAPSS2,ACE2,SCARB1,PCSK6,HSD17B11
Coexpression	M19068	CERVERA_SDHB_TARGETS_2	C2:CGP: Chemical and Genetic Perturbations	1.69e-09	1.63e-05	1.09e-07	1.06e-06	17	115	TTR,MELTF,AFP,CXCL5,HKDC1,ISX,APOA1,TMC4,MST1,FXYD2,PAG1,GALNT3,CFB,APOM,SLC26A2,TMT1B,TF
GO: Biological Process	GO:0043436	oxoacid metabolic process		1.8e-09	1.21e-05	4.72e-07	4.44e-06	69	1109	HEXB,EPHX2,HGD,CEACAM5,HK2,RIMKLA,ENPP1,MGAT4A,CEACAM7,MGLL,ATP8B1,CYP2S1,PFKP,HNF4A,ME1,FABP1,SCD,AGT,OSBPL9,ABCC2,ALDOB,PLOD2,ALOX15B,PRXL2B,FA2H,AOAH,HKDC1,APOA4,FADS6,PPARA,SIRT6,CPT1A,LPIN3,SLC6A8,TRIB3,ASL,DGAT1,ACSL5,PECR,CYP2B6,NAAA,CYP3A5,INSIG1,CYP27A1,ABHD3,GATM,CEACAM6,SLC46A1,BCKDHB,ACSS2,ELOVL2,NAGS,GGT1,CEACAM1,SULT1B1,SULT1A1,LPGAT1,SLC27A2,DPEP1,HNF1A,NR1H3,PAPSS2,PNPO,CRYL1,MLXI…
GO: Biological Process	GO:0046903	secretion		1.81e-09	1.22e-05	4.72e-07	4.44e-06	76	1277	PCSK5,ERBB3,CEACAM5,HK2,SYN3,ACHE,ENPP1,WIPF3,CEACAM7,F2,HNF4A,SNAP47,FAM3D,ADORA1,CAMK2N1,AGT,FGB,HRH2,CCL5,SMPD3,ABCC2,MMP7,SLC51A,FER1L5,VEGFA,ANG,ANPEP,ANXA4,MYO18A,SIRT6,CPT1A,SLC51B,SLC17A9,CADPS,MTTP,RAB11FIP5,C1QTNF12,MCTP2,DGAT1,ABCC3,MYO6,SRI,PDX1,CEACAM6,TNFRSF11A,PTAFR,STEAP2,ITGB2,GDNF,CEACAM1,GIPR,BMP2,BMP8B,NELL2,RAB3B,SLC38A3,CA2,HNF1A,DPYSL2,TCF7L2,RAB25,RBP4,NR1H3,SLC44A4,ATP13A…
GO: Biological Process	GO:1901615	organic hydroxy compound metabolic process		1.82e-09	1.23e-05	4.72e-07	4.44e-06	49	659	EPHX2,ENPP1,ATP8B1,TTR,CLCN2,HPN,NPC1L1,OSBPL9,DEGS2,ALOX15B,DUOXA2,HSD17B7,MOGAT2,SGPP2,DUOX2,APOA1,APOA2,APOA4,APOB,SLC1A1,PLPP3,MTTP,MOGAT3,IPMK,DGAT1,TTC39B,PECR,NAAA,CYP3A5,INSIG1,CYP27A1,FAXDC2,PTAFR,ACSS2,RETSAT,APOBR,ITGB2,ITPKA,BMP2,SULT1B1,SULT1A1,NQO1,SLC27A2,HNF1A,SRD5A3,RBP4,PNPO,MALRD1,SCARB1
Coexpression Atlas	GSM854276_500	Myeloid Cells, DC.11cloSer.Salm3.SI, CD45+ MHCII+ Gr1- CD11c-lo CD11b+, Small Intestine, avg-4	Immgen.org, GSE15907	1.88e-09	7.67e-06	2.89e-08	2.57e-07	34	364	HK2,HLA-DMA,SLCO2B1,TMEM176A,KLF4,SEMA6D,CCL5,PLAUR,RBM47,SELENOP,TMEM176B,ANPEP,AOAH,CP,BHLHE40,ZFP36,GDA,ATF3,CTSS,ABCC3,NAAA,CYP27A1,GATM,TNFRSF11A,PTAFR,CFB,GPX3,CXCL16,TF,LGALS3,PAK1,CD68,EPCAM,MXD1
Coexpression Atlas	Facebase_ST1_Univ_100	UniversalReference_WholeMouseP1_top-relative-expression-ranked_100	FaceBase_ST1	1.89e-09	7.71e-06	2.9e-08	2.58e-07	16	84	EPHX2,TTR,LRG1,FABP1,AFP,FGB,ALDOB,VTN,APOA2,APOA4,APOM,CALML4,SLC27A2,TF,LGALS4,TFF3
Coexpression	MM1240	CADWELL_ATG16L1_TARGETS_UP	M2:CGP: Chemical and Genetic Perturbations	1.94e-09	1.87e-05	1.24e-07	1.2e-06	17	116	FABP1,FCGRT,SCD,NPC1L1,ALPI,ALPG,APOA1,POU4F1,APOA4,CIDEC,MTTP,SLC36A2,GGT1,TRIM15,RBP4,TF,PC
Coexpression Atlas	GSM605826_500	Myeloid Cells, DC.4+.Sp, CD11b CD4 CD45 CD11c CD8a, Spleen, avg-1	Immgen.org, GSE15907	1.94e-09	7.88e-06	2.95e-08	2.62e-07	35	383	HK2,HLA-DMA,TMEM176A,PLAC8,PIK3CB,CCL5,RBM47,FLNB,TMEM176B,ANPEP,FLVCR1,BHLHE40,ZFP36,ATF3,CTSS,IL6R,CYP27A1,GATM,PTAFR,PTPN3,PTPRJ,TMEM150B,DPP4,ADAP1,ARRDC4,GPR35,CXCL16,PAPSS2,TFRC,SLC44A1,CD7,PAK1,CD68,NOSTRIN,STOM
Coexpression Atlas	gudmap_developingKidney_e15.5_stage III -IV renal corpusc_500_k3	DevelopingKidney_e15.5_stage III -IV renal corpusc_emap-27945_k-means-cluster#3_top-relative-expression-ranked_500	Gudmap Mouse MOE430.2	1.96e-09	7.99e-06	2.98e-08	2.65e-07	12	43	HNF4A,ALDOB,FXYD2,GGT1,CLRN3,SLC27A2,DPP4,AMN,USH1C,ACE2,PRR15,CDH16
GO: Cellular Component	GO:0030141	secretory granule		1.99e-09	1.24e-06	6.2e-08	4.35e-07	64	1002	HEXB,PCSK5,AOC1,TTR,LRG1,PLAC8,SERPINA1,SERPINA4,AP2A2,SCNN1A,FGB,QPCT,PLAUR,PLG,SERPINF2,VEGFA,SELENOP,ANG,ANPEP,AGPAT2,TMPRSS4,APOA1,IGF2,SLC17A9,CADPS,RAB11FIP5,PRKCD,CTNNA1,CTSS,CXADR,DGAT1,PRSS3,IQGAP2,SRI,CEACAM6,PTAFR,ITGB2,TMBIM1,CEACAM1,ITPR3,GGH,PTPRJ,DIAPH1,ATP11A,DMBT1,RAB3B,MVP,SLC27A2,STBD1,TCN1,SYT7,TF,LGALS3,TFF3,ORM1,GUSB,SERPINB1,CD68,PAM,CDA,ARHGAP45,PADI2,SERPINA5,STOM
Coexpression	M1887	WUNDER_INFLAMMATORY_RESPONSE_AND_CHOLESTEROL_UP	C2:CGP: Chemical and Genetic Perturbations	2.1e-09	2.02e-05	1.32e-07	1.29e-06	13	63	HLA-DMA,HLA-DMB,PLAC8,SERPINA1,MUC17,CCL5,ERO1A,CTSS,GATM,DMBT1,TFF3,TFRC,LY75
Coexpression	M41080	HARALAMBIEVA_PBMC_M_M_R_II_AGE_11_22YO_VACCINATED_VS_UNVACCINATED_7YR_UP	C7:VAX: HIPC Vaccine Response	2.1e-09	2.02e-05	1.32e-07	1.29e-06	55	973	HK2,ACHE,ENPP2,PFKP,SQOR,ABHD17C,CKB,MEP1A,PLEKHH1,MELTF,MGAT3,AK4,SMPD3,KIAA1522,SLC6A8,C1orf226,FAR2,C15orf48,ATF3,MUC1,PRDM16,TTC39B,TNFSF10,MYO7B,RAPGEF5,IRF1,GBP3,IRF7,ISG20,RILP,GCNT1,TRIM14,RNF43,CFB,ITPKA,CEACAM1,KLF5,COBL,SLC27A2,CPEB2,TMEM150B,P4HA2,STBD1,TCN2,CECR2,OAS3,NR1H3,ATP13A2,ATP10A,NSUN7,LGALS9,P2RX4,KIAA1217,MXD1,STOM
Coexpression Atlas	facebase_RNAseq_e14.5_palate_poster_proximal_ERK2_WT_2500_K1	facebase_RNAseq_e14.5_palate_poster_proximal_ERK2_WT_2500_K1	Gudmap RNAseq	2.18e-09	8.87e-06	3.3e-08	2.93e-07	21	150	CNKSR1,CYP2S1,KLF4,S100A6,RBM47,ANG,DOK4,ARHGAP27,RNF39,ATP10B,GCHFR,IL22RA1,PTPN3,TTC22,RAB3B,EGLN3,RAB25,GPX2,LGALS3,C1orf115,EFNA1
Coexpression	M6225	WANG_BARRETTS_ESOPHAGUS_UP	C2:CGP: Chemical and Genetic Perturbations	2.24e-09	2.15e-05	1.4e-07	1.36e-06	12	52	ST6GALNAC6,FABP1,ALDOB,VIPR1,ATP2A3,ISG20,ITGB4,CA2,TCN2,LGALS9,TM4SF4,GPA33
GO: Biological Process	GO:0006082	organic acid metabolic process		2.25e-09	1.52e-05	5.61e-07	5.27e-06	69	1115	HEXB,EPHX2,HGD,CEACAM5,HK2,RIMKLA,ENPP1,MGAT4A,CEACAM7,MGLL,ATP8B1,CYP2S1,PFKP,HNF4A,ME1,FABP1,SCD,AGT,OSBPL9,ABCC2,ALDOB,PLOD2,ALOX15B,PRXL2B,FA2H,AOAH,HKDC1,APOA4,FADS6,PPARA,SIRT6,CPT1A,LPIN3,SLC6A8,TRIB3,ASL,DGAT1,ACSL5,PECR,CYP2B6,NAAA,CYP3A5,INSIG1,CYP27A1,ABHD3,GATM,CEACAM6,SLC46A1,BCKDHB,ACSS2,ELOVL2,NAGS,GGT1,CEACAM1,SULT1B1,SULT1A1,LPGAT1,SLC27A2,DPEP1,HNF1A,NR1H3,PAPSS2,PNPO,CRYL1,MLXI…
Coexpression	M5906	HALLMARK_ESTROGEN_RESPONSE_EARLY	H: Hallmark	2.3e-09	2.21e-05	1.43e-07	1.39e-06	22	200	KLF4,SCNN1A,TMEM164,FLNB,CLDN7,BHLHE40,SLC1A1,SLC22A5,MUC1,TJP3,ELOVL2,CHPT1,SEMA3B,SLC27A2,CA12,RAB17,SLC26A2,PAPSS2,TFF3,ABLIM1,SCARB1,ELF3
Coexpression	M8646	BOYLAN_MULTIPLE_MYELOMA_C_D_DN	C2:CGP: Chemical and Genetic Perturbations	2.35e-09	2.26e-05	1.45e-07	1.41e-06	26	276	ENPP1,TMEM176A,SQOR,LRG1,HOOK1,PIK3CB,AFP,CCL5,PLCB4,SELENOP,TMEM176B,CP,CLDN7,GDA,RHPN2,C15orf48,TTC39B,IQGAP2,GATM,ISG20,GGH,P4HA2,CD7,KIAA1217,RORA,EPCAM
Coexpression Atlas	GSM538231_500	Myeloid Cells, DC.103+11b-.Lu, CD11chi CD11b low CD103+ MHCII+ SiglecF-, Lung, avg-3	Immgen.org, GSE15907	2.36e-09	9.62e-06	3.56e-08	3.17e-07	37	424	HLA-DMA,CYP2S1,ACVRL1,KLF4,CKB,HAVCR1,SEMA6D,FCGRT,PIK3CB,QPCT,CCL5,RBM47,ANPEP,ANXA4,BHLHE40,ZFP36,LSR,C15orf48,ATF3,CTNNA1,NAAA,MYO6,CYP27A1,NAGA,GATM,SULT1A1,GPX3,CXCL16,TF,LGALS3,SLC44A1,PAK1,CD68,NOSTRIN,LY75,EPCAM,STOM
Coexpression Atlas	gudmap_developingLowerUrinaryTract_adult_ureter_500_k3	DevelopingLowerUrinaryTract_adult_ureter_emap-29479_k-means-cluster#3_top-relative-expression-ranked_500	Gudmap Mouse MOE430.2	2.42e-09	9.87e-06	3.64e-08	3.24e-07	18	110	MGAT4A,ATP8B1,POF1B,PLEKHH1,TMC4,CDCP1,TMEM45B,OCLN,ABCC3,GALNT3,ATP10B,PTPN3,MARVELD3,RAB25,LGALS3,RASSF6,TSPAN8,TMPRSS2
Coexpression	MM1041	MARTINEZ_RB1_AND_TP53_TARGETS_UP	M2:CGP: Chemical and Genetic Perturbations	2.47e-09	2.37e-05	1.51e-07	1.47e-06	44	688	EPHX2,CEACAM5,SERPINF1,CEACAM7,HNF4G,ME1,TUBA4A,LRG1,FABP1,NDRG1,SCD,PRR13,QPCT,CCL20,SH3KBP1,CP,APOA4,TXNIP,IGF2,CIDEC,SLC22A5,ATF3,FUT2,SDCBP2,IL2RG,SOD3,CEACAM6,GBP3,CEACAM1,CHPT1,EGLN3,SLC11A2,ARRDC4,TF,TSPAN3,TFRC,LGALS9,TGFBR3,SLC35A3,PCSK6,SERPINB1,HSD17B11,PC,STOM
Coexpression Atlas	ratio_SC_vs_EB_1000_K3	ratio_StemCell_vs_EmbryoidBody_top-relative-expression-ranked_1000_k-means-cluster#3	PCBC	2.5e-09	1.02e-05	3.74e-08	3.33e-07	20	137	CNKSR1,FOXA3,TUBA4A,TFCP2L1,VIL1,VIPR1,CLDN7,LSR,ANO9,PRSS8,ARHGAP26,FAM83E,PTAFR,ITPR3,FZD5,B4GALNT3,RAB17,LLGL2,CDA,EPCAM
Coexpression	M4391	PEREZ_TP53_TARGETS	C2:CGP: Chemical and Genetic Perturbations	2.51e-09	2.41e-05	1.53e-07	1.49e-06	63	1201	CNKSR1,TMEM144,HLA-DMB,PLCXD1,WIPF3,ATP8B1,CYP2S1,MYORG,ABHD17C,CKB,HOXC6,CLIC5,HPN,ABCG2,GOLGA7B,VIPR1,EPB41L4B,FA2H,KIF16B,DUOX2,CXCL14,ZFYVE28,MST1,IGF2,DOK4,FRZB,RASEF,ARHGAP27,C1QTNF12,CXADR,DGAT1,MXI1,CIDEB,NAAA,MYO6,RAPGEF5,GATM,FAXDC2,IRF1,SLC46A1,PTAFR,GDNF,GGT1,CEACAM1,BMP2,PTPRJ,MARVELD3,NPNT,ESPN,TRIM2,GALNT12,B3GNT7,GRIK3,GLB1L2,MAP7,USH1C,LGALS9,CNNM4,EFNA1,EFNA2,LMO7,KIAA1217,RORA
Coexpression Atlas	GSM854273_500	Myeloid Cells, DC.103-11b+F4/80lo.Kd, CD45+ CD11c+ I-A/I-E+ CD11b+ F4/80lo, Kidney, avg-3	Immgen.org, GSE15907	2.55e-09	1.04e-05	3.8e-08	3.38e-07	36	406	HEXB,HK2,HLA-DMA,TMEM176A,KLF4,CKB,S100A6,FCGRT,PIK3CB,RBM47,TMEM176B,ANPEP,GDA,ATF3,CTNNA1,CTSS,IL6R,NAAA,CYP27A1,NAGA,GATM,TNFRSF11A,PTAFR,CEACAM1,TMEM150B,NDNF,KCNE3,GPR35,CXCL16,TF,LGALS3,RASA4,PAK1,CD68,NOSTRIN,STOM
Coexpression Atlas	PCBC_EB_fibroblast_1000	Progenitor-Cell-Biology-Consortium_EmbryoidBody_from_inducedPluripotentialStemCells_derived from_from_fibroblast_top-relative-expression-ranked_1000	PCBC	2.66e-09	1.08e-05	3.95e-08	3.51e-07	63	986	CDX2,SLCO2B1,TMEM176A,F2,HNF4A,TTR,FABP1,MEP1A,TMEM132C,HAVCR1,SERPINA1,HOXC6,CLIC5,SH3RF2,AFP,AGT,FGB,PLG,SERPINF2,VIL1,VTN,TMEM176B,UBD,CXCL14,APOA1,APOA2,POU4F1,APOA4,APOB,CLDN3,IGF2,FRZB,MTTP,URAD,TJP3,CYP3A5,GDNF,ITIH2,HAGLR,GIPR,GJB1,NELL2,LCN15,SLC39A5,GNRH2,SLC38A3,NPNT,DPP4,CECR2,RBP4,TPPP,GRIK3,USH1C,TF,SGK2,GREM2,ORM1,ABCC6P1,EFNA2,TM4SF4,TMPRSS2,RSPO1,CDH17
Coexpression	M39135	AIZARANI_LIVER_C39_EPCAM_POS_BILE_DUCT_CELLS_4	C8: Cell Type Signature	2.73e-09	2.62e-05	1.65e-07	1.61e-06	21	184	PFKP,S100A6,MMP7,CCL20,VEGFA,FLNB,ANXA4,CLDN7,ATF3,ATP1A1,OCLN,MYO6,BMP2,KLF5,COBL,LAMC2,TM4SF4,ELF3,CD151,TM4SF1,EPCAM
Coexpression	M1613	MILI_PSEUDOPODIA_CHEMOTAXIS_DN	C2:CGP: Chemical and Genetic Perturbations	2.77e-09	2.66e-05	1.66e-07	1.62e-06	33	427	RGMB,HLA-DMB,SERPINF1,RPS24,F3,AP2A2,SCD,PCDH19,USP53,FLNB,ERO1A,CLSTN1,ZFP36,TXNIP,MST1,SLCO2A1,CTNNA1,ATP1A1,DGAT1,SOD3,TNFSF9,NAGA,SRI,SEMA3B,DIAPH1,P4HA2,SLC11A2,ATP10A,RGS3,P2RX4,P4HA1,SLC39A14,PCDH1
Coexpression	M5688	CADWELL_ATG16L1_TARGETS_UP	C2:CGP: Chemical and Genetic Perturbations	2.8e-09	2.7e-05	1.68e-07	1.63e-06	16	104	FABP1,FCGRT,SCD,NPC1L1,ALPI,APOA1,POU4F1,APOA4,CIDEC,MTTP,SLC36A2,GGT1,TRIM15,RBP4,TF,PC
Coexpression Atlas	gudmap_kidney_adult_RenMedVasc_Tie2_1000	kidney_adult_RenMedVasc_Tie2_top-relative-expression-ranked_1000	Gudmap Mouse MOE430.2	2.87e-09	1.17e-05	4.25e-08	3.78e-07	57	850	TSPAN15,HLA-DMA,HLA-DMB,TMEM176A,MGLL,ACVRL1,SQOR,PLAC8,S100A6,SIAE,SERPINA1,MFNG,NDRG1,CLIC5,MTUS1,QPCT,PLAUR,PLCB4,ABCG2,FLNB,SELENOP,IFNGR1,TXNIP,PLPP3,C15orf48,FXYD2,IL2RG,ACSL5,TTC39B,MYO1D,MYO6,TNFSF10,ERAP1,RAPGEF5,ARHGAP26,IRF1,IRF7,GCHFR,TMBIM1,CFB,CEACAM1,SULT1A1,CALML4,CA2,EGLN3,TCN2,LGALS9,TGFBR3,C1orf115,SLC44A1,EFNA1,KIAA1217,TSPAN8,NOSTRIN,TM4SF1,PCDH1,STOM
Coexpression	M40167	DESCARTES_FETAL_CEREBRUM_VASCULAR_ENDOTHELIAL_CELLS	C8: Cell Type Signature	3.01e-09	2.9e-05	1.79e-07	1.74e-06	40	593	CARD10,ATP8B1,ACVRL1,KLF4,MELTF,CLIC5,QPCT,DEGS2,TMEM176B,ANPEP,TMC4,XPNPEP2,SLC51B,LSR,SHROOM1,IGF2,TMEM45B,SLCO2A1,FRZB,TMEM37,OCLN,C1QTNF12,ITPR3,SULT1B1,TMEM92,NQO1,SLC38A3,DPEP1,OAS3,ATP10A,RGS3,TFRC,C1orf115,EFNA1,EVA1B,SLC16A4,CDA,NOSTRIN,TM4SF1,PCDH1
Coexpression Atlas	Facebase_RNAseq_ratio_e9.5_MandibularArch_vs_MaxillaryArch_2500_K3	FacebaseRNAseq_ratio_e9.5_MandibularArch_vs_MaxillaryArch_top-relative-expression-ranked_2500_k-means-cluster#3	FaceBase_RNAseq	3.01e-09	1.22e-05	4.44e-08	3.94e-07	30	298	MGAT4A,MTUS1,PRR13,CGN,PLS1,LRRC75A,TMEM176B,KIAA1522,CAMSAP3,CLDN7,CDCP1,CLSTN1,TXNIP,CCDC68,TTC39B,PRSS8,MYO1D,SPOCK2,BMP2,KLF5,TMEM163,NPNT,RAB25,MAP7,PAPSS2,GREM2,SLC44A1,LMO7,ENTPD5,EPCAM
Coexpression	MM893	BRUINS_UVC_RESPONSE_VIA_TP53_GROUP_A	M2:CGP: Chemical and Genetic Perturbations	3.18e-09	3.06e-05	1.88e-07	1.83e-06	53	930	HGD,PHYKPL,ENPP1,B3GALT5,SIAE,PRELID2,ABCG2,ALDOB,RBM47,HSD17B7,VTN,ANPEP,ERO1A,SH3KBP1,CAMSAP3,KIF16B,SLC39A4,APOA4,CLDN3,MISP,TRIB3,ASL,ATF3,C11orf86,FXYD2,PRDM16,CIDEB,ANO9,PRSS3,PAG1,CYP2B6,NAAA,TNFSF9,CYP3A5,GATM,CDHR5,STEAP2,APOM,GUCD1,COBL,TMEM163,CALML4,EPS8L3,CECR2,KLC4,SLC44A4,PNPO,ACE2,RNF220,TM4SF4,RFLNA,ENTPD8,SLC6A14
Coexpression Atlas	gudmap_kidney_adult_GlomCapSys_Tie2_k4_1000	kidney_adult_GlomCapSys_Tie2_k-means-cluster#4_top-relative-expression-ranked_1000	Gudmap Mouse MOE430.2	3.24e-09	1.32e-05	4.76e-08	4.23e-07	16	87	TMEM176A,SQOR,SERPINA1,NDRG1,SCD,SELENOP,CCDC68,ACSL5,NAGA,GCNT1,CFB,GGH,CALML4,TCN2,TSPAN8,SERPINB1
Coexpression Atlas	gudmap_kidney_e15.5_Podocyte_MafB_200	kidney_e15.5_Podocyte_MafB_top-relative-expression-ranked_200	Gudmap Mouse MOE430.2	3.26e-09	1.33e-05	4.77e-08	4.24e-07	22	168	HLA-DMB,ENPP2,PLAC8,MEP1A,AFP,ALDOB,ANPEP,CLDN7,FXYD2,MYO6,GCNT1,TINAG,CLRN3,CALML4,SLC27A2,NPNT,NDNF,DPP4,ACE2,TSPAN8,EPCAM,CDH16
Coexpression	M39017	FAN_EMBRYONIC_CTX_BIG_GROUPS_CAJAL_RETZIUS	C8: Cell Type Signature	3.29e-09	3.17e-05	1.93e-07	1.88e-06	36	499	HINT1,ACHE,PFKP,ME1,TUBA4A,HPCAL1,QPCT,PLCB4,DEGS2,PLOD2,DHRS11,AGPAT2,CLSTN1,PCP4L1,CYP3A5,INSIG1,SPOCK2,GCHFR,TNFRSF11A,CAPN8,GGH,NQO1,TMEM163,CA2,NDNF,RCAN1,NOL3,NTRK1,ATP13A2,TSPAN3,GREM2,RSPO3,ABLIM1,RASSF6,KIAA1217,CDH4
Coexpression	M45001	LIU_OVARIAN_CANCER_TUMORS_AND_XENOGRAFTS_XDGS_DN	C2:CGP: Chemical and Genetic Perturbations	3.38e-09	3.25e-05	1.97e-07	1.92e-06	80	1714	HLA-DMA,HLA-DMB,SLCO2B1,ENPP1,ENPP2,SERPINF1,CEACAM7,TMEM176A,MGLL,ACVRL1,ME1,SQOR,SERPINA1,MFNG,HOXC6,MTUS1,QPCT,PLAUR,ABCG2,FBXO32,CCL20,PLOD2,SELENOP,TMEM176B,ANPEP,UBD,AOAH,CXCL14,CP,SLC1A1,ZFP36,HAPLN1,IFNGR1,CADPS,SLCO2A1,PNMA2,C15orf48,CCDC68,ATP2A3,IL2RG,CTSS,ACSL5,SOD3,ABCC3,PAG1,NAAA,TNFSF10,CYP27A1,ABHD3,GATM,IRF1,TNFRSF11A,PTAFR,STEAP2,APOBR,ITGB2,GDNF,ELOVL2,HEPH,CFB,BMP2,TACC1,CA2,W…
GO: Biological Process	GO:0032528	microvillus organization		3.47e-09	2.34e-05	8.12e-07	7.62e-06	11	36	ATP8B1,HNF4A,PLS1,VIL1,MYO1A,CDHR2,CDHR5,KLF5,ESPN,USH1C,PAM
GO: Biological Process	GO:0140352	export from cell		3.5e-09	2.35e-05	8.12e-07	7.62e-06	72	1199	PCSK5,CEACAM5,SYN3,ACHE,WIPF3,CEACAM7,F2,HNF4A,SNAP47,FAM3D,ADORA1,CAMK2N1,AGT,FGB,CCL5,ABCG2,SMPD3,ABCC2,FER1L5,ANG,ANXA4,MYO18A,SIRT6,CPT1A,SLC17A9,CADPS,SLC22A5,MTTP,RAB11FIP5,ATP1A1,C1QTNF12,ATP1B1,FXYD2,MCTP2,DGAT1,MYO6,SRI,PDX1,CEACAM6,TNFRSF11A,PTAFR,STEAP2,ITGB2,GDNF,SLC36A2,CEACAM1,GIPR,BMP2,BMP8B,NELL2,RAB3B,SLC38A3,HNF1A,DPYSL2,TCF7L2,RAB25,KCNE3,RBP4,NR1H3,SLC44A4,ATP13A2,SYT7,LGALS3,…
Coexpression	M19826	ZHANG_RESPONSE_TO_IKK_INHIBITOR_AND_TNF_UP	C2:CGP: Chemical and Genetic Perturbations	3.5e-09	3.37e-05	2.03e-07	1.98e-06	23	223	CCL5,PLAUR,CCL20,SGPP2,IFNGR1,C15orf48,ATF3,PAG1,TNFSF10,IRF1,GBP3,ISG20,PTAFR,BMP2,TRIM15,RCAN1,LAMA2,CXCL16,EFNA1,INF2,SERPINB1,TM4SF1,MXD1
Coexpression	M8689	CHIANG_LIVER_CANCER_SUBCLASS_CTNNB1_DN	C2:CGP: Chemical and Genetic Perturbations	3.83e-09	3.69e-05	2.2e-07	2.15e-06	20	170	MGLL,FOXA3,F3,CCL20,CP,XK,MUC13,LSR,GDA,SLC15A1,SLC17A9,C15orf48,PAG1,BMP2,INHBE,ARRDC4,CXCL16,LGALS3,LGALS4,CDA
Coexpression	M2513	ELVIDGE_HIF1A_TARGETS_DN	C2:CGP: Chemical and Genetic Perturbations	3.85e-09	3.7e-05	2.2e-07	2.15e-06	15	92	HK2,NDRG1,AK4,ANG,ERO1A,MXI1,ISG20,P4HA2,EGLN3,STBD1,NOL3,RNASE4,P4HA1,RASA4,PAM
Coexpression Atlas	gudmap_RNAseq_p2_CD2APMEISWT_2500	gudmap_RNAseq_p2_CD2APMEISWT_2500	Gudmap RNAseq	4.02e-09	1.64e-05	5.86e-08	5.21e-07	96	1820	TSPAN15,ACHE,TMEM176A,MGLL,ACVRL1,SQOR,CKB,S100A6,ADORA1,HOXC6,CAMK2N1,NDRG1,CLIC5,HPCAL1,FCGRT,HPN,OSBPL9,FBXO32,LRRC75A,FOXD2,SELENOP,ANG,TMEM176B,CORO2A,AGPAT2,SH3KBP1,CP,PPARA,VSIG10,CPT1A,ZFP36,IFNGR1,TXNIP,AATK,SLCO2A1,TMEM37,PCP4L1,ATF3,ATP1A1,ATP2A3,IL2RG,CTSS,IL6R,ACSL5,SOD3,TTC39B,PAG1,MYO1D,ERAP1,RAPGEF5,ARHGAP26,CYP27A1,SRI,HCAR1,ABHD3,IRF1,IRF7,RILP,RETSAT,TRIM14,TMBIM1,CFB,CEACAM1,V…
GO: Cellular Component	GO:0005911	cell-cell junction		4.29e-09	2.68e-06	1.28e-07	8.96e-07	45	596	CNKSR1,CEACAM5,AOC1,CEACAM7,POF1B,NDRG1,HPN,CGN,ABCC2,BAIAP2L2,ALOX15B,VEGFA,USP53,EPB41L4B,SH3KBP1,CAMSAP3,CLDN3,CLDN7,VSIG10,LSR,SHROOM1,PLPP3,PRKCD,CTNNA1,ATP1A1,OCLN,ATP1B1,CXADR,TJP3,CEACAM6,CDHR5,CEACAM1,GJB1,PTPRJ,FZD5,MARVELD3,DPP4,LLGL2,LMO7,PAK1,ARHGEF2,EPCAM,PCDH1,CDH4,CDH17
Coexpression Atlas	GSM854290_500	Myeloid Cells, DC.8-4-11b-.SLN, CD45-APC CD11b-FITC CD11c-eFluor780 CD4-PE CD8a-eF, Lymph Node, avg-1	Immgen.org, GSE15907	4.33e-09	1.76e-05	6.29e-08	5.59e-07	34	376	HINT1,HLA-DMA,TMEM176A,DSCAML1,PLAC8,S100A6,SEMA6D,CCL5,TMEM176B,ANPEP,ANXA4,VSIG10,CDCP1,ATF3,ATP1B1,NAAA,CYP27A1,GATM,TNFRSF11A,PTPN3,MVP,ADAP1,CXCL16,PAPSS2,TSPAN3,SLC44A1,EFNA2,CD7,RASA4,SERPINB1,CD68,NOSTRIN,LY75,MXD1
GO: Biological Process	GO:0006631	fatty acid metabolic process		4.45e-09	3e-05	1e-06	9.39e-06	39	470	EPHX2,CEACAM5,ENPP1,CEACAM7,MGLL,CYP2S1,HNF4A,FABP1,SCD,AGT,ALOX15B,PRXL2B,FA2H,AOAH,APOA4,FADS6,PPARA,CPT1A,LPIN3,TRIB3,DGAT1,ACSL5,PECR,CYP2B6,NAAA,INSIG1,ABHD3,CEACAM6,ACSS2,ELOVL2,GGT1,CEACAM1,LPGAT1,SLC27A2,HNF1A,NR1H3,CRYL1,MLXIPL,PAM
Coexpression Atlas	gudmap_developingKidney_e15.5_cortic collect duct_200	DevelopingKidney_e15.5_cortic collect duct_emap-28132_top-relative-expression-ranked_200	Gudmap Mouse MOE430.2	4.49e-09	1.83e-05	6.5e-08	5.77e-07	21	156	RGMB,GCNT3,ATP8B1,TFCP2L1,UGT8,RBM47,SGPP2,CLDN3,TMEM45B,OCLN,MUC1,PRDM16,SORL1,NPNT,DPP4,GLB1L2,LGALS3,TFRC,TSPAN8,TMPRSS2,CDH16
Coexpression	M39051	MANNO_MIDBRAIN_NEUROTYPES_HMGL	C8: Cell Type Signature	4.51e-09	4.34e-05	2.55e-07	2.48e-06	39	577	TMEM144,SLCO2B1,SERPINF1,MFNG,FCGRT,PLAUR,RBM47,ANXA4,PAQR8,ZFP36,IFNGR1,TXNIP,FAR2,ATF3,CTSS,IL6R,ACSL5,SORL1,PAG1,TNFSF9,ARHGAP26,NAGA,GATM,IRF1,PTAFR,APOBR,ITGB2,TMBIM1,KCNE3,SLC11A2,C12orf75,PTPN18,TNFRSF11B,P2RX4,SCARB1,CD68,ARHGAP45,CDH17,STOM
Coexpression	M39074	ZHONG_PFC_MAJOR_TYPES_ASTROCYTES	C8: Cell Type Signature	4.53e-09	4.36e-05	2.55e-07	2.48e-06	28	326	MGLL,F3,MYORG,SEMA6D,SCD,AGT,AK4,PAQR8,CXCL14,HAPLN1,PLPP3,MASP1,ABHD3,GATM,GDPD2,ELOVL2,SLC38A3,NPNT,CA12,WSCD1,TCF7L2,GPX3,TSPAN3,LGALS3,CRYL1,EFNA1,P4HA1,LRP4
Coexpression	M45709	HE_LIM_SUN_FETAL_LUNG_C1_PROXIMAL_SECRETORY_3_CELL	C8: Cell Type Signature	4.53e-09	4.36e-05	2.55e-07	2.48e-06	23	226	ABO,PFKP,FAM3D,PLAC8,CCL20,MUC20,EPB41L4B,UBD,SGPP2,BHLHE40,C15orf48,FUT2,MUC4,SOD3,SPIRE2,TNFSF10,CEACAM6,ISG20,ITGB4,SLC44A4,LGALS9,PRR15,TM4SF1
Coexpression Atlas	gudmap_dev gonad_e13.5_M_SertoliCell_Sox9_k4_1000	dev gonad_e13.5_M_SertoliCell_Sox9_k-means-cluster#4_top-relative-expression-ranked_1000	Gudmap Mouse ST 1.0	4.57e-09	1.86e-05	6.6e-08	5.87e-07	39	474	TSPAN15,ERBB3,HK2,WIPF3,ME1,F3,ADORA1,SIAE,SCD,PLOD2,USP53,DHRS11,CP,VSIG10,SLC6A8,CADPS,FRZB,ATP1A1,MASP1,ERAP1,GATM,GCNT1,ACSS2,GDNF,CDC42SE2,TACC1,RAB3B,ESPN,RCAN1,PAPSS2,GREM2,P2RX4,P4HA1,KIAA1217,SH3D19,LRRC1,ENTPD5,PADI2,SLC6A14
Coexpression Atlas	gudmap_developingKidney_e15.5_ureter tip_flank cortic collct_1000_k1	DevelopingKidney_e15.5_ureter tip_flank cortic collct_emap-27752_k-means-cluster#1_top-relative-expression-ranked_1000	Gudmap Mouse MOE430.2	4.73e-09	1.92e-05	6.8e-08	6.04e-07	20	142	GCNT3,ATP8B1,PLAC8,S100A6,TFCP2L1,UGT8,RNF186,SGPP2,HKDC1,OCLN,MUC1,SORL1,NPNT,RAB17,GALNT12,GLB1L2,LGALS3,TMPRSS2,EPCAM,CDH16
Coexpression Atlas	Facebase_RNAseq_e10.5_Olfactory Pit_500	FacebaseRNAseq_e10.5_Olfactory Pit_top-relative-expression-ranked_500	FaceBase_RNAseq	4.82e-09	1.96e-05	6.91e-08	6.15e-07	40	495	ERBB3,F3,CKB,PLEKHH1,MFNG,HOOK1,PRR13,CGN,AK4,RBM47,PLS1,CAMSAP3,SGPP2,PRR15L,CLDN3,CLDN7,CDCP1,LSR,RHPN2,CCDC68,RASEF,ATP1B1,MUC4,ACSL5,TTC39B,PRSS8,ELOVL2,KLF5,TMEM163,SLC27A2,WSCD1,RAB25,CECR2,MAP7,GREM2,MLXIPL,ABLIM1,LLGL2,LMO7,EPCAM
Coexpression	M4008	FARMER_BREAST_CANCER_APOCRINE_VS_LUMINAL	C2:CGP: Chemical and Genetic Perturbations	4.84e-09	4.66e-05	2.71e-07	2.64e-06	28	327	HGD,LDOC1,TUBA4A,NDRG1,MTUS1,PIK3CB,SCD,AK4,VEGFA,ERO1A,ABCC6,FAR2,NAAA,GALNT3,ELOVL2,GGT1,NDNF,PAPSS2,TSPAN3,TFF3,ACE2,ORM1,P4HA1,PCSK6,TSPAN8,TMPRSS2,PAM,SERPINA5
Transcription Factor Binding Site	TGACCTY_V$ERR1_Q2	TGACCTY_V$ERR1_Q2	TFBS	4.87e-09	4.89e-06	9.79e-07	7.33e-06	47	832	PCSK5,F2,CKB,CLCN2,MTUS1,SH3RF2,HPN,CGN,SCNN1A,CCL20,ALPG,ANPEP,DHRS11,BHLHE40,SLC6A8,SLC9A3,DOK4,SLCO2A1,ATF3,PRKCSH,ATP1B1,PRDM16,SOD3,SORL1,CAPN12,MASP1,RAPGEF5,ABHD3,CDHR5,RILP,STEAP2,ITPKA,NR1I2,DIAPH1,CREB3L3,SLC38A3,CA2,SLC26A3,TCF7L2,GRIK3,TF,RGS3,TFRC,ACE2,USP2,ELF3,CDH16
GO: Biological Process	GO:0032530	regulation of microvillus organization		5.02e-09	3.38e-05	1.07e-06	1.01e-05	8	16	ATP8B1,HNF4A,PLS1,VIL1,CDHR2,CDHR5,KLF5,USH1C
Coexpression Atlas	PCBC_ratio_EB_from-ESC_vs_EB_from-OSKM-L_cfr-2X-p05	Embryoid Body Cells-reprogram_NA_vs_Embryoid Body Cells-reprogram_OSKM-L-Confounder_removed-fold2.0_adjp0.05	PCBC_AltAnalyze	5.05e-09	2.05e-05	7.18e-08	6.38e-07	17	102	CDX2,F2,TMEM132C,HAVCR1,HPN,AK4,ANG,CLDN3,HAPLN1,TXNIP,PRSS8,FAXDC2,GNRH2,NDNF,RAB25,ARRDC4,EPCAM
Coexpression Atlas	PCBC_ratio_EB_from-ESC_vs_EB_from-mRNA_cfr-2X-p05	Embryoid Body Cells-method_NA_vs_Embryoid Body Cells-method_mRNA-Confounder_removed-fold2.0_adjp0.05	PCBC_AltAnalyze	5.05e-09	2.05e-05	7.18e-08	6.38e-07	17	102	CDX2,F2,TMEM132C,HAVCR1,HPN,AK4,ANG,CLDN3,HAPLN1,TXNIP,PRSS8,FAXDC2,GNRH2,NDNF,RAB25,ARRDC4,EPCAM
Coexpression Atlas	gudmap_kidney_adult_RenCorpuscGlomer_200	kidney_adult_RenCorpuscGlomer_top-relative-expression-ranked_200	Gudmap Mouse MOE430.2	5.08e-09	2.07e-05	7.21e-08	6.41e-07	22	172	MGAT4A,MGLL,ATP8B1,PLAC8,S100A6,CLIC5,CP,SLCO2A1,IL2RG,MYO1D,IQGAP2,CEACAM1,CALML4,RAB3B,NPNT,DPP4,LGALS9,LMO7,TSPAN8,PAK1,NOSTRIN,TM4SF1
GO: Biological Process	GO:0006897	endocytosis		5.1e-09	3.44e-05	1.07e-06	1.01e-05	58	880	CEACAM5,ACHE,ENPP1,ENPP2,CEACAM7,ADORA1,HAVCR1,AP2A2,PIK3CB,FER1L5,VEGFA,VTN,SH3KBP1,MYO18A,TMPRSS4,APOA1,APOA2,SLC9A3,PRKCD,MAPK3,ARHGAP27,IL2RG,SORL1,MASP1,MYO6,CEACAM6,STEAP2,APOBR,ITGB2,CFB,CEACAM1,CDC42SE2,PTPRJ,DIAPH1,DMBT1,DPP4,DPYSL2,STBD1,RAB17,AMN,NR1H3,CXCL16,SYT7,TF,LGALS3,TFRC,ACE2,PLLP,ELMO3,SCARB1,ARHGAP12,PAK1,LRP4,TMPRSS2,CD151,NOSTRIN,LY75,RSPO1
Coexpression	M2488	FORTSCHEGGER_PHF8_TARGETS_DN	C2:CGP: Chemical and Genetic Perturbations	5.21e-09	5.01e-05	2.9e-07	2.82e-06	47	783	RGMB,MGLL,SQOR,S100A6,CAMK2N1,MTA3,SCD,CGN,CCL5,PLCB4,ABCG2,TMEM164,PLS1,LRRC75A,BAIAP2L2,FLNB,CORO2A,DHRS11,MYO18A,VSIG10,ASL,STX16,MUC1,CTSS,CXADR,GBP3,SPOCK2,ISG20,RILP,ACSS2,ITGB4,TMBIM1,CEACAM1,MTMR11,TMEM92,SEMA3B,ATP11A,TACC1,MVP,DPYSL2,LAMC2,RGS3,TGFBR3,SLC22A18,INF2,SUSD2,CDH16
Coexpression Atlas	GSM854232_500	Myeloid Cells, DC.103+11b+.Salm3.SI, CD45+ MHCII+ Gr1- CD11c-hi CD11b+ CD103+ F480-, Small Intestine, avg-5	Immgen.org, GSE15907	5.3e-09	2.16e-05	7.49e-08	6.65e-07	34	379	HK2,HLA-DMA,KLF4,PLAC8,QPCT,CCL5,PLAUR,RBM47,ANPEP,ANXA4,BHLHE40,ZFP36,GDA,ATF3,CTSS,DGAT1,NAAA,INSIG1,GATM,CFB,SULT1A1,CA2,SLC27A2,ARRDC4,CXCL16,TF,LGALS3,SLC16A3,PAK1,CD68,NOSTRIN,EPCAM,MXD1,CDH17
GO: Biological Process	GO:0015718	monocarboxylic acid transport		5.31e-09	3.57e-05	1.08e-06	1.02e-05	25	218	CEACAM5,SLCO2B1,CEACAM7,ATP8B1,FABP1,HRH2,ABCG2,ABCC2,SLC51A,PPARA,CPT1A,SLC51B,SLC6A8,SLCO2A1,MTTP,ACSL5,ABCC3,CEACAM6,TNFRSF11A,CEACAM1,SLC27A2,HNF1A,P2RX4,SLC16A4,SLC16A3
Coexpression Atlas	GSM854291_500	Myeloid Cells, DC.8-4-11b-.SLN, CD11b-FITC CD4-PE CD11c-eFluor780 CD8a-eFluor450 C, Lymph Node, avg-3	Immgen.org, GSE15907	5.52e-09	2.25e-05	7.78e-08	6.91e-07	36	418	HLA-DMA,TMEM176A,DSCAML1,S100A6,SEMA6D,FCGRT,PIK3CB,CCL5,TMEM176B,ANPEP,ANXA4,VSIG10,CTNNA1,CTSS,NAAA,CYP27A1,GATM,TNFRSF11A,MVP,NDNF,ADAP1,ARRDC4,CXCL16,PAPSS2,TF,TSPAN3,LGALS3,SLC44A1,CD7,RASA4,PAK1,SERPINB1,CD68,NOSTRIN,LY75,MXD1
Coexpression Atlas	ratio_EB-fibro_vs_EB-cbCD34_1000_K5	ratio_EmbryoidBody-fibro_vs_EmbryoidBody-derived-from_CD34-iPSC_top-relative-expression-ranked_1000_k-means-cluster#5	PCBC	5.71e-09	2.32e-05	8.01e-08	7.12e-07	28	271	F2,HNF4A,FABP1,MEP1A,HAVCR1,SERPINA1,AFP,FGB,PLG,SERPINF2,ALOX15B,APOA1,APOA2,APOA4,APOB,SLC3A1,URAD,PRSS3,LCN15,SLC39A5,GNRH2,AMN,TMPRSS6,RBP4,SLC44A4,TF,CCDC183,CDH17
Coexpression	M17454	MASSARWEH_TAMOXIFEN_RESISTANCE_UP	C2:CGP: Chemical and Genetic Perturbations	5.72e-09	5.5e-05	3.16e-07	3.08e-06	39	582	MGAT4A,B3GALT5,KLF4,FOXA3,SQOR,ABHD17C,MTA3,MTUS1,HPN,CGN,FXYD3,USP53,EPB41L4B,PRR15L,XK,VSIG10,ABCC6,ZFP36,TRIB3,TMEM45B,NT5C2,RAB11FIP5,MUC1,ATP2A3,GALNT3,IQGAP2,TNFSF10,TMEM135,CEACAM6,PTPRJ,DIAPH2,TACC1,SLC11A2,RCAN1,GALNT12,SYT7,KIAA1217,LRRC1,STOM
Coexpression	MM1053	MILI_PSEUDOPODIA_CHEMOTAXIS_DN	M2:CGP: Chemical and Genetic Perturbations	5.82e-09	5.59e-05	3.2e-07	3.12e-06	33	440	RGMB,HLA-DMB,SERPINF1,RPS24,F3,AP2A2,SCD,PCDH19,USP53,FLNB,ERO1A,CLSTN1,ZFP36,TXNIP,MST1,SLCO2A1,CTNNA1,ATP1A1,DGAT1,SOD3,TNFSF9,NAGA,SRI,SEMA3B,DIAPH1,P4HA2,SLC11A2,ATP10A,RGS3,P2RX4,P4HA1,SLC39A14,PCDH1
GO: Biological Process	GO:0062012	regulation of small molecule metabolic process		5.92e-09	3.99e-05	1.17e-06	1.1e-05	38	455	EPHX2,CEACAM5,CEACAM7,HNF4A,ME1,FAM3D,FABP1,CLCN2,AGT,ISX,APOA1,APOA4,APOB,PPARA,SIRT6,CPT1A,MST1,IGF2,TRIB3,C1QTNF12,DGAT1,ACSL5,TTC39B,INSIG1,CEACAM6,PTAFR,PPP1R3G,CEACAM1,BMP2,LPGAT1,HNF1A,TCF7L2,NR1H3,TFF3,MLXIPL,MALRD1,RORA,CDA
Coexpression Atlas	Facebase_RNAseq_e9.5_Facial Mesenchyne_2500_K4	FacebaseRNAseq_e9.5_Facial Mesenchyne_top-relative-expression-ranked_2500_k-means-cluster#4	FaceBase_RNAseq	6.03e-09	2.46e-05	8.44e-08	7.5e-07	30	307	HLA-DMA,MGAT4A,MTUS1,CGN,PLS1,LRRC75A,VEGFA,TMEM176B,CLDN3,CLDN7,CDCP1,CLSTN1,CCDC68,TTC39B,PRSS8,MYO1D,SPOCK2,BMP2,KLF5,TMEM163,SLC27A2,NPNT,RAB25,MAP7,PAPSS2,GREM2,SLC44A1,LMO7,ENTPD5,EPCAM
GO: Molecular Function	GO:0038024	cargo receptor activity		6.19e-09	9.13e-06	1.52e-06	1.2e-05	17	99	ENPP1,ENPP2,HAVCR1,HPN,VTN,TMPRSS4,LSR,SORL1,APOBR,ITGB2,DMBT1,STBD1,AMN,CXCL16,TFRC,SCARB1,TMPRSS2
Coexpression Atlas	gudmap_developingKidney_e15.5_cortic collect duct_1000_k1	DevelopingKidney_e15.5_cortic collect duct_emap-28132_k-means-cluster#1_top-relative-expression-ranked_1000	Gudmap Mouse MOE430.2	6.25e-09	2.54e-05	8.71e-08	7.75e-07	13	57	CHDH,AFP,HPN,ALDOB,RBM47,KIF12,GDNF,TINAG,CHPT1,CLRN3,SLC27A2,DPP4,SLC44A4
GO: Biological Process	GO:0072330	monocarboxylic acid biosynthetic process		6.75e-09	4.55e-05	1.3e-06	1.22e-05	28	271	CEACAM5,CEACAM7,MGLL,HNF4A,SCD,AGT,OSBPL9,ALOX15B,PRXL2B,FA2H,APOA4,FADS6,TRIB3,PECR,INSIG1,CYP27A1,ABHD3,GATM,CEACAM6,ACSS2,ELOVL2,CEACAM1,LPGAT1,SLC27A2,HNF1A,NR1H3,MLXIPL,MALRD1
Coexpression	M2424	YANG_BCL3_TARGETS_UP	C2:CGP: Chemical and Genetic Perturbations	6.76e-09	6.5e-05	3.7e-07	3.6e-06	28	332	PCSK5,ABO,CKB,SCD,TMEM164,RBM47,CP,CPT1A,LSR,TMEM37,IGSF1,SDCBP2,IL6R,CXADR,MASP1,TNFSF9,RAPGEF5,ABHD3,GATM,FAXDC2,IRF7,CEACAM1,IGSF10,TF,RSPO3,TGFBR3,SERPINB1,CD68
Coexpression Atlas	GSM854320_500	Myeloid Cells, MF.Lv, CD45+ F4/80+ CD11b+, Liver, avg-2	Immgen.org, GSE15907	6.83e-09	2.78e-05	9.49e-08	8.44e-07	35	402	HLA-DMA,KLF4,SQOR,PLAC8,S100A6,NDRG1,MTUS1,PLAUR,RBM47,TMEM176B,ANXA4,AOAH,ZFP36,GDA,PRKCD,ATF3,CTSS,IL6R,NAAA,CYP27A1,PTAFR,CFB,CEACAM1,KCNE3,ADAP1,TCN2,GPR35,OAS3,TF,LGALS3,SLC16A3,SCARB1,CD68,PADI2,STOM
Coexpression Atlas	Arv_SC-H9hpx_500_K3	AravindRamakr_StemCell-H9hpx_top-relative-expression-ranked_500_k-means-cluster#3	PCBC	7.04e-09	2.86e-05	9.74e-08	8.66e-07	22	175	AOC1,CEACAM7,FABP1,MEP1A,SERPINA1,ALDOB,ALPI,APOA4,MUC13,C15orf48,MYO1A,CYP3A5,CDHR5,DMBT1,PHGR1,SLC39A5,SLC26A3,TRIM31,LGALS4,TFF3,TSPAN8,CDH17
Coexpression	M2698	P53_DN.V1_UP	C6: Oncogenic Signature	7.09e-09	6.82e-05	3.85e-07	3.76e-06	21	194	F3,TUBA4A,SCNN1A,UGT8,VIPR1,CORO2A,CLDN3,HAPLN1,LSR,MISP,CXADR,PRSS3,CEACAM6,IRF1,ITGB4,CFB,PTPRH,KLF5,RNASE4,TSPAN8,EPCAM
Coexpression	M12029	BILD_HRAS_ONCOGENIC_SIGNATURE	C2:CGP: Chemical and Genetic Perturbations	7.23e-09	6.96e-05	3.91e-07	3.81e-06	24	251	HK2,TUBA4A,S100A6,HOXC6,NDRG1,MTUS1,PLAUR,CCL20,CXCL5,VEGFA,SEMA4B,FLNB,CDCP1,ZFP36,TMEM45B,PNMA2,ARHGAP27,ITPR3,BMP2,KLF5,TCF7L2,SLC16A3,SERPINB1,MXD1
Coexpression Atlas	gudmap_developingKidney_e15.5_Proximal Tubules_200_k2	DevelopingKidney_e15.5_Proximal Tubules_emap-28005_k-means-cluster#2_top-relative-expression-ranked_200	Gudmap Mouse MOE430.2	7.27e-09	2.96e-05	1e-07	8.91e-07	9	23	ALDOB,VIL1,FXYD2,CDHR2,GGT1,SLC39A5,AMN,SLC44A4,CDH16
Coexpression Atlas	PCBC_SC_1000	Progenitor-Cell-Biology-Consortium_StemCell_top-relative-expression-ranked_1000	PCBC	7.38e-09	3e-05	1.02e-07	9.02e-07	62	989	HK2,SYN3,ENPP1,WIPF3,B3GALT5,CYP2S1,ZBED10P,FOXA3,HNF4G,HOOK1,AFP,HPN,CGN,SCNN1A,UGT8,HRH2,RBM47,CXCL5,PLS1,ALPG,VIL1,VIPR1,VIPR2,EPB41L4B,FA2H,XK,CLDN3,CLDN7,LSR,IGSF1,OCLN,MUC3A,ATP2A3,CXADR,TJP3,CYP2B6,PRSS8,FAM83E,GDPD2,TNFRSF11A,NELL2,NR1I2,TMEM92,FZD5,COBL,MARVELD3,SLC27A2,INHBE,RAB25,RAB17,CECR2,B3GNT7,MAP7,USH1C,NSUN7,ORM1,HHLA2,MLXIPL,LLGL2,TMPRSS2,EPCAM,PCDH1
Coexpression	M18090	NUYTTEN_NIPP1_TARGETS_DN	C2:CGP: Chemical and Genetic Perturbations	7.4e-09	7.11e-05	3.97e-07	3.88e-06	49	845	PLCXD1,TUBA4A,CKB,CAMK2N1,CXCL5,VEGFA,ANPEP,EPB41L4B,ERO1A,PAQR8,XK,VSIG10,CPT1A,SLC1A1,TDP2,TXNIP,LSR,MISP,TMEM45B,ATP2A3,IL6R,MXI1,ABCC3,GALNT3,MYO1D,ABHD3,CEACAM6,GCHFR,ITPKA,CEACAM1,TMEM92,CHPT1,KLF5,LPGAT1,TACC1,DPYSL2,TCF7L2,TRIM2,RBP4,TFF2,SFXN1,SLC44A1,SLC16A4,INF2,TMPRSS2,ELF3,PRR15,EPCAM,MXD1
Coexpression Atlas	GSM854315_500	Myeloid Cells, MF.169+11chi.SLN, CD11b+ CD169+ CD11chigh, Lymph Node, avg-2	Immgen.org, GSE15907	7.88e-09	3.21e-05	1.08e-07	9.6e-07	34	385	HLA-DMA,TMEM176A,CKB,S100A6,FCGRT,PIK3CB,CCL5,RBM47,TMEM176B,ANPEP,ANXA4,GDA,ATF3,CTNNA1,CTSS,NAAA,CYP27A1,NAGA,GATM,PTAFR,CFB,CEACAM1,KCNE3,ADAP1,GPR35,CXCL16,LGALS3,CD7,RASA4,GUSB,PAK1,CD68,NOSTRIN,STOM
Coexpression Atlas	gudmap_developingLowerUrinaryTract_e13.5_bladder neck-urethr epithel_1000_k4	DevelopingLowerUrinaryTract_e13.5_bladder neck-urethr epithel_emap-30875_k-means-cluster#4_top-relative-expression-ranked_1000	Gudmap Mouse MOE430.2	7.95e-09	3.24e-05	1.09e-07	9.65e-07	19	132	WIPF3,POF1B,SIAE,FBXO32,TMPRSS4,TMC4,CLDN3,VSIG10,CDCP1,BHLHE40,SLCO2A1,ATP1B1,MCTP2,ISG20,PTPN3,COBL,TRIM2,CXCL16,TSPAN8
Coexpression Atlas	gudmap_kidney_adult_GlomCapSys_Tie2_1000	kidney_adult_GlomCapSys_Tie2_top-relative-expression-ranked_1000	Gudmap Mouse MOE430.2	8.1e-09	3.3e-05	1.1e-07	9.8e-07	56	852	TMEM176A,MGLL,ACVRL1,KLF4,SQOR,LRG1,PLAC8,S100A6,SERPINA1,NDRG1,CLIC5,MTUS1,SCD,PRR13,PLAUR,SELENOP,IFNGR1,TXNIP,DOK4,PLPP3,SLCO2A1,CCDC68,MAPK3,ATP2A3,IL2RG,ACSL5,TTC39B,MYO1D,TNFSF10,ERAP1,RAPGEF5,ARHGAP26,NAGA,IRF7,GCHFR,GCNT1,TMBIM1,CFB,CEACAM1,GGH,BMP2,SULT1A1,CALML4,MVP,NPNT,TCN2,LGALS9,SLC44A1,EFNA1,LMO7,TSPAN8,ALKBH3,SERPINB1,NOSTRIN,TM4SF1,PCDH1
Coexpression	M39129	AIZARANI_LIVER_C30_HEPATOCYTES_4	C8: Cell Type Signature	8.11e-09	7.8e-05	4.33e-07	4.22e-06	33	446	EPHX2,HGD,HDHD3,ERBB3,ENPP1,TLCD4,CHDH,HPN,ABCC2,VEGFA,CP,PPARA,MST1,SHROOM1,SLC17A9,ASL,ATF3,MUC3A,MOGAT3,IL6R,SORL1,ABCC3,CYP2B6,CYP3A5,INSIG1,PTAFR,PTPN3,NR1I2,SLC27A2,MLXIPL,EFNA1,CLMN,SLC39A14
Transcription Factor Binding Site	M29941	DLX2_TARGET_GENES	MSigDB	8.27e-09	8.32e-06	1.39e-06	1.04e-05	25	290	LRRC66,PHYKPL,GCNT3,SLCO2B1,PLAC8,HOXC6,MIR194-2HG,RBM47,MGAM2,SELENOP,TMPRSS4,MUC13,TDP2,C1orf226,ERAP1,ARHGAP26,SRI,MTMR11,VILL,CLRN3,TRIM31,LMO7,LRRC1,TSPAN8,CDH17
Coexpression	M2665	AKT_UP_MTOR_DN.V1_UP	C6: Oncogenic Signature	8.52e-09	8.2e-05	4.53e-07	4.42e-06	20	178	TLCD4,ST6GALNAC6,LRG1,AK4,CXCL5,TMPRSS4,ATF3,TJP3,GDPD2,BMP8B,PTPRJ,VILL,MVP,ARRDC4,LAMC2,CXCL16,SLC44A1,CLMN,GUSB,PAK1
Coexpression Atlas	GSM538255_500	Myeloid Cells, DC.8+.SLN, CD11b-FITC CD4-PE CD11c-Alexa750 CD8a-PacificBlue, Lymph Node, avg-3	Immgen.org, GSE15907	8.54e-09	3.48e-05	1.16e-07	1.03e-06	36	425	HK2,HLA-DMA,TMEM176A,ACVRL1,CKB,SEMA6D,FCGRT,PIK3CB,CCL5,RBM47,TMEM176B,ANPEP,ANXA4,LSR,ATF3,NAAA,CYP27A1,NAGA,GATM,SULT1A1,TMEM150B,ARRDC4,GPR35,CXCL16,PAPSS2,TF,TSPAN3,SLC44A1,RASA4,GUSB,SCARB1,PAK1,CD68,NOSTRIN,LY75,STOM
Coexpression Atlas	gudmap_developingLowerUrinaryTract_e15.5_ureteral tissue_500	DevelopingLowerUrinaryTract_e15.5_ureteral tissue_emap-8234_top-relative-expression-ranked_500	Gudmap Mouse MOE430.2	8.81e-09	3.59e-05	1.19e-07	1.06e-06	35	406	HGD,TLCD4,LDOC1,FOXA3,F2,HNF4A,TTR,TUBA4A,FABP1,SERPINA1,AFP,FGB,PLG,SERPINF2,ALDOB,VTN,APOA1,APOA2,APOB,MST1,IGF2,CYP3A5,ISG20,GDNF,ITIH2,SLC36A2,APOM,CA2,SLC27A2,RBP4,TF,LGALS3,PNPO,SGK2,TSPAN8
Coexpression Atlas	gudmap_kidney_adult_CortVasc_Tie2_200	kidney_adult_CortVasc_Tie2_top-relative-expression-ranked_200	Gudmap Mouse MOE430.2	8.91e-09	3.63e-05	1.2e-07	1.07e-06	21	162	HGD,MGLL,PLAC8,MEP1A,S100A6,SERPINA1,NDRG1,CLIC5,ALDOB,SLCO2A1,FXYD2,TNFSF10,GCNT1,CEACAM1,CALML4,SLC27A2,GPX3,LGALS9,LACTB2,TSPAN8,TM4SF1
Coexpression Atlas	GSM854258_500	Myeloid Cells, DC.103-11b+.Salm3.SI, CD45+ MHCII+ Gr1- CD11c-hi CD11b+ CD103- F480+, Small Intestine, avg-4	Immgen.org, GSE15907	9.01e-09	3.67e-05	1.21e-07	1.08e-06	33	368	HK2,HLA-DMA,SLCO2B1,MGAT4A,TMEM176A,KLF4,SEMA6D,FCGRT,PLAUR,RBM47,SELENOP,TMEM176B,ANPEP,AOAH,CP,ZFP36,GDA,ATF3,CTSS,ABCC3,CYP27A1,GATM,TNFRSF11A,CFB,SULT1A1,GPX3,CXCL16,TF,LGALS3,P2RX4,PAK1,CD68,MXD1
Coexpression	M45714	HE_LIM_SUN_FETAL_LUNG_C1_SMG_BASAL_CELL	C8: Cell Type Signature	9.02e-09	8.67e-05	4.75e-07	4.63e-06	30	380	PFKP,SEMA6D,SCD,QPCT,AK4,FBXO32,CCL20,UBD,BHLHE40,SLC1A1,SLC6A8,FRZB,NAAA,TNFSF10,RAPGEF5,TRIM14,ITGB4,LPGAT1,CA12,GPX2,PAPSS2,LGALS9,RASSF6,SCARB1,LRP4,RFLNA,LY75,TM4SF1,PADI2,STOM
Coexpression	M9639	HAN_SATB1_TARGETS_UP	C2:CGP: Chemical and Genetic Perturbations	9.03e-09	8.68e-05	4.75e-07	4.63e-06	32	425	LDOC1,F3,TUBA4A,NDRG1,QPCT,AK4,PLOD2,BHLHE40,SLC1A1,TMEM45B,PLPP3,SLC17A9,ASL,CXADR,SORL1,MYO1D,NAGA,ISG20,GGT1,NELL2,KLF5,CA12,INHBE,TCF7L2,NOL3,GPR35,OAS3,PAPSS2,ATP13A2,P4HA1,CDH4,CDH16
Coexpression Atlas	GSM605859_500	Myeloid Cells, MF.Thio5.II+480lo.PC, CD115+ MHC II+ F480lo SiglecF- CD11c+, Peritoneal Cavity, avg-3	Immgen.org, GSE15907	9.08e-09	3.69e-05	1.22e-07	1.08e-06	36	426	HLA-DMA,TMEM176A,SQOR,CKB,S100A6,FCGRT,QPCT,PLAUR,RBM47,TMEM176B,ANPEP,ANXA4,FLVCR1,LSR,GDA,ATF3,CTSS,IL6R,NAAA,CYP27A1,GATM,PTAFR,CEACAM1,GGH,SULT1A1,NDNF,KCNE3,ARRDC4,GPR35,TF,LGALS3,P2RX4,SLC16A3,CD68,NOSTRIN,STOM
Coexpression	M2469	KRIEG_HYPOXIA_NOT_VIA_KDM3A	C2:CGP: Chemical and Genetic Perturbations	9.63e-09	9.26e-05	5.03e-07	4.91e-06	45	746	RGMB,HK2,RIMKLA,CARD10,MGLL,PFKP,TUBA4A,MFNG,NDRG1,MTUS1,PRELID2,SCD,AK4,FBXO32,PLOD2,ANG,CP,CDCP1,BHLHE40,SLC1A1,SLC6A8,LSR,TRIB3,SLC22A5,PNMA2,RAB11FIP5,ARHGAP27,ATP1B1,MUC1,MXI1,CAPN12,INSIG1,ISG20,ITGB2,DIAPH2,TACC1,RAB3B,P4HA2,DPYSL2,STBD1,NOL3,LGALS3,P4HA1,PAM,SLC39A14
Coexpression Atlas	gudmap_developingLowerUrinaryTract_e13.5_bladder epithelial cells_500_k2	DevelopingLowerUrinaryTract_e13.5_bladder epithelial cells_emap-30875_k-means-cluster#2_top-relative-expression-ranked_500	Gudmap Mouse MOE430.2	9.77e-09	3.98e-05	1.3e-07	1.16e-06	20	148	ERBB3,LDOC1,UGT8,AK4,PLS1,CLDN7,ZFP36,CCDC68,RASEF,OCLN,SORL1,ANO9,ABHD3,KLF5,CA2,TRIM2,RASSF6,LRRC1,EPCAM,CDH17
Coexpression Atlas	gudmap_kidney_adult_RenalCortexMixed_Std_k4_200	kidney_adult_RenalCortexMixed_Std_k-means-cluster#4_top-relative-expression-ranked_200	Gudmap Mouse MOE430.2	9.8e-09	3.99e-05	1.3e-07	1.16e-06	13	59	EPHX2,MEP1A,UGT8,AK4,SLC3A1,SLC51B,CLRN3,TMT1B,SLC19A3,PAPSS2,ACE2,SLC16A4,CDA
Coexpression	M45006	SOGA_COLORECTAL_CANCER_MYC_DN	C2:CGP: Chemical and Genetic Perturbations	9.82e-09	9.45e-05	5.11e-07	4.98e-06	13	71	SLC1A1,SLCO2A1,SLC22A5,MAPK3,ACSS2,RETSAT,SLC26A3,SLC26A2,SLC17A4,PAPSS2,SLC22A18,SLC35A3,SLC44A1
Coexpression Atlas	Facebase_RNAseq_e9.5_Olfactory Placode_1000	FacebaseRNAseq_e9.5_Olfactory Placode_top-relative-expression-ranked_1000	FaceBase_RNAseq	9.83e-09	4e-05	1.3e-07	1.16e-06	61	973	ERBB3,HLA-DMA,CYP2S1,PLEKHH1,HOOK1,FCGRT,PCDH19,PRR13,CGN,AK4,RBM47,PLS1,TMEM176B,ANXA4,CAMSAP3,SGPP2,CLDN3,CLDN7,CPT1A,CDCP1,LSR,RHPN2,SLCO2A1,CCDC68,RAB11FIP5,RASEF,FXYD2,CTSS,ACSL5,TTC39B,PRSS8,SPOCK2,SLC46A1,ACSS2,RETSAT,APOBR,ELOVL2,IGSF10,BMP2,BMP8B,NELL2,PTPRJ,FZD5,KLF5,TMEM163,SLC27A2,NPNT,WSCD1,RAB25,CECR2,MAP7,PAPSS2,TFRC,LGALS9,GREM2,RNASE4,LLGL2,LMO7,KIAA1217,PAK1,EPCAM
GO: Biological Process	GO:0008202	steroid metabolic process		1.02e-08	6.84e-05	1.86e-06	1.74e-05	34	386	EPHX2,ENPP1,ATP8B1,CLCN2,AFP,NPC1L1,OSBPL9,HSD17B7,DHRS11,APOA1,APOA2,APOA4,APOB,IGF2,MTTP,ATP1A1,TTC39B,CYP2B6,CYP3A5,INSIG1,CYP27A1,FAXDC2,APOBR,BMP2,SULT1B1,NR1I2,SULT1A1,SLC27A2,HNF1A,SRD5A3,MALRD1,SCARB1,RORA,HSD17B11
GO: Biological Process	GO:0019752	carboxylic acid metabolic process		1.02e-08	6.86e-05	1.86e-06	1.74e-05	66	1085	HEXB,EPHX2,HGD,CEACAM5,HK2,RIMKLA,ENPP1,MGAT4A,CEACAM7,MGLL,ATP8B1,CYP2S1,PFKP,HNF4A,ME1,FABP1,SCD,AGT,OSBPL9,ABCC2,ALDOB,PLOD2,ALOX15B,PRXL2B,FA2H,AOAH,HKDC1,APOA4,FADS6,PPARA,SIRT6,CPT1A,LPIN3,SLC6A8,TRIB3,ASL,DGAT1,ACSL5,PECR,CYP2B6,NAAA,CYP3A5,INSIG1,CYP27A1,ABHD3,GATM,CEACAM6,SLC46A1,BCKDHB,ACSS2,ELOVL2,NAGS,GGT1,CEACAM1,LPGAT1,SLC27A2,DPEP1,HNF1A,NR1H3,PNPO,CRYL1,MLXIPL,MALRD1,SLC16A3,PAM,PC
Coexpression	M2856	STK33_SKM_DN	C6: Oncogenic Signature	1.06e-08	0.000102	5.46e-07	5.32e-06	25	276	EPHX2,TMEM144,ABO,TUBA4A,PIK3CB,SCD,CCL5,PLS1,ANPEP,DHRS11,ASL,MCTP2,SORL1,TNFSF10,RAPGEF5,CHPT1,STBD1,GALNT12,CXCL16,ORM1,ABLIM1,C1orf115,SH3D19,CDA,PADI2
Coexpression Atlas	gudmap_kidney_adult_Podocyte_MafB_200	kidney_adult_Podocyte_MafB_top-relative-expression-ranked_200	Gudmap Mouse MOE430.2	1.07e-08	4.37e-05	1.42e-07	1.26e-06	22	179	MGAT4A,MGLL,ATP8B1,CLIC5,PLOD2,VEGFA,SELENOP,ANXA4,IFNGR1,SLCO2A1,MYO1D,IQGAP2,MYO6,PTPRJ,RAB3B,NPNT,CA12,DPP4,LRRC1,TSPAN8,PAK1,TM4SF1
Coexpression	M15896	MARTINEZ_RB1_AND_TP53_TARGETS_UP	C2:CGP: Chemical and Genetic Perturbations	1.1e-08	0.000106	5.65e-07	5.51e-06	40	621	EPHX2,SERPINF1,HNF4G,ME1,TUBA4A,LRG1,FABP1,NDRG1,SCD,PRR13,QPCT,CCL20,SH3KBP1,CP,APOA4,TXNIP,IGF2,CIDEC,SLC22A5,ATF3,FUT2,SDCBP2,IL2RG,SOD3,CEACAM1,CHPT1,EGLN3,SLC11A2,ARRDC4,TF,TSPAN3,TFRC,LGALS9,TGFBR3,SLC35A3,PCSK6,SERPINB1,HSD17B11,PC,STOM
Coexpression Atlas	gudmap_developingLowerUrinaryTract_adult_ureter_500_k1	DevelopingLowerUrinaryTract_adult_ureter_emap-29479_k-means-cluster#1_top-relative-expression-ranked_500	Gudmap Mouse MOE430.2	1.1e-08	4.47e-05	1.45e-07	1.29e-06	20	149	FAM3D,TTR,TFCP2L1,MMP7,PRR15L,TMPRSS4,CP,CLDN3,GDA,RHPN2,SLCO2A1,RNF39,TJP3,GALNT3,CEACAM1,MVP,TRIM2,RAB17,SLC44A4,TSPAN8
Coexpression Atlas	Arv_SC-HD_2500_K1	AravindRamakr_StemCell-HD_top-relative-expression-ranked_2500_k-means-cluster#1	PCBC	1.14e-08	4.65e-05	1.5e-07	1.33e-06	31	334	CEACAM5,AOC1,GCNT3,CEACAM7,FAM3D,POF1B,CCL20,FXYD3,EPB41L4B,CORO2A,PRR15L,HKDC1,TMPRSS4,CLDN7,GDA,MISP,TMEM45B,C15orf48,RASEF,FUT2,SDCBP2,PRSS3,PRSS8,FAM83E,CEACAM6,RAB25,LINC01559,AMN,GPX2,TRIM31,RNF183
Coexpression	M45717	HE_LIM_SUN_FETAL_LUNG_C2_APOE_POS_M2_MACROPHAGE_CELL	C8: Cell Type Signature	1.16e-08	0.000112	5.93e-07	5.78e-06	34	476	TSPAN15,ENPP2,TMEM176A,MGLL,PFKP,ACVRL1,ME1,SQOR,SCD,TMEM176B,ANPEP,CDCP1,TDP2,TMEM37,C15orf48,ABCC3,SLC36A1,CYP27A1,SLC46A1,TRIM14,SLC11A2,RCAN1,TCN2,GPX3,OAS3,NR1H3,PAPSS2,ATP13A2,PNPO,SLC22A18,INF2,KIAA1217,CD151,STOM
Coexpression Atlas	GSM538249_500	Myeloid Cells, DC.4+.Sp, CD11b CD11c CD45 CD8a CD4, Spleen, avg-3	Immgen.org, GSE15907	1.16e-08	4.73e-05	1.52e-07	1.35e-06	34	391	HLA-DMA,TMEM176A,PIK3CB,CCL5,RBM47,TMEM176B,ANPEP,FLVCR1,CDCP1,ZFP36,CTSS,IL6R,CYP27A1,GATM,TNFRSF11A,PTAFR,PTPN3,PTPRJ,CA2,TMEM150B,DPP4,ADAP1,ARRDC4,GPR35,CXCL16,PAPSS2,TFRC,SLC44A1,CD7,RASA4,PAK1,CD68,NOSTRIN,STOM
Coexpression	M9908	LANDIS_BREAST_CANCER_PROGRESSION_DN	C2:CGP: Chemical and Genetic Perturbations	1.17e-08	0.000113	5.97e-07	5.82e-06	13	72	EPHX2,KLF4,SQOR,PLAC8,S100A6,MFNG,CIDEC,DGAT1,BCKDHB,HEPH,SULT1A1,DPEP1,NR1H3
Coexpression Atlas	GSM777063_500	Stromal Cells, LEC.SLN, gp38+ CD31+, Lymph Node, avg-4	Immgen.org, GSE15907	1.17e-08	4.75e-05	1.52e-07	1.35e-06	37	450	TSPAN15,ENPP2,TMEM176A,MGLL,KLF4,ME1,LRG1,NDRG1,FCGRT,SCD,PLCB4,CCL20,SELENOP,TMEM176B,ANPEP,CP,SLC39A4,BHLHE40,PLPP3,SLCO2A1,ATF3,NAAA,TNFSF10,RAPGEF5,TNFRSF11A,CFB,BMP2,NQO1,RCAN1,TCN2,ARRDC4,TGFBR3,EFNA1,SUSD2,PAM,CD151,TM4SF1
Coexpression	M9286	GSE36078_WT_VS_IL1R_KO_LUNG_DC_AFTER_AD5_INF_UP	C7:IMMUNESIGDB: ImmuneSigDB	1.22e-08	0.000118	6.18e-07	6.03e-06	21	200	CYP2S1,S100A6,CAMK2N1,CCL5,RBM47,ERO1A,BHLHE40,IFNGR1,TMEM37,C15orf48,CTNNA1,GALNT3,IQGAP2,APOBR,TMBIM1,GGT1,PTPRJ,LGALS3,RNASE4,CD7,ARHGEF2
Coexpression Atlas	gudmap_developingKidney_e15.5_cortic collect duct_100	DevelopingKidney_e15.5_cortic collect duct_emap-28132_top-relative-expression-ranked_100	Gudmap Mouse MOE430.2	1.29e-08	5.25e-05	1.68e-07	1.49e-06	15	83	GCNT3,ATP8B1,TFCP2L1,UGT8,SGPP2,CLDN3,TMEM45B,NPNT,DPP4,GLB1L2,LGALS3,TFRC,TSPAN8,TMPRSS2,CDH16
Coexpression Atlas	PCBC_ratio_SC-LF blastocyst_vs_SC blastocyst_cfr-2X-p05	SC-LF blastocyst_vs_SC blastocyst-Confounder_removed-fold2.0_adjp0.05	PCBC_AltAnalyze	1.32e-08	5.37e-05	1.71e-07	1.52e-06	34	393	CEACAM5,B3GALT5,PLAC8,FABP1,MEP1A,SERPINA1,FXYD3,ALDOB,VEGFA,SELENOP,ANPEP,CXCL14,APOA1,APOA4,MUC13,ZFP36,TXNIP,C1orf226,TRIB3,C15orf48,ATF3,ATP1B1,CDHR5,BMP2,NQO1,DMBT1,PHGR1,SLC27A2,INHBE,ARRDC4,LGALS4,TFF3,P4HA1,TSPAN8
GO: Biological Process	GO:0019725	cellular homeostasis		1.33e-08	8.98e-05	2.36e-06	2.22e-05	63	1021	HEXB,HK2,ENPP1,SERPINF1,FOXA3,F2,CKB,ADORA1,MELTF,CAMK2N1,MUC17,PIK3CB,AGT,SCNN1A,CCL5,PLCB4,FBXO32,ABCC2,PLG,ANG,ERO1A,FLVCR1,HKDC1,CP,SLC39A4,XK,CLSTN1,SLC1A1,ABCC6,SLC9A3,RAB11FIP5,MAPK3,ATP1A1,C1QTNF12,ATP1B1,FXYD2,ATP2A3,SRI,PDX1,SLC46A1,STEAP2,ITPR3,NELL2,NQO1,DIAPH1,SLC39A5,SLC38A3,CA2,HNF1A,SLC26A3,TCF7L2,KCNE3,SLC11A2,NOL3,TMPRSS6,RHOT2,ATP13A2,TF,TFRC,CNNM4,MLXIPL,SERPINB1,SLC39A14
Coexpression Atlas	GSM538263_500	Myeloid Cells, DC.8-4-11b+.MLN, CD45-APC CD11b-FITC CD11c-eFluor780 CD4-PE CD8a-eF, Lymph Node, avg-2	Immgen.org, GSE15907	1.36e-08	5.55e-05	1.76e-07	1.57e-06	35	413	TMEM176A,SEMA6D,PIK3CB,CCL5,RBM47,TMEM176B,ANPEP,ANXA4,VSIG10,BHLHE40,ZFP36,ATF3,CYP27A1,TNFRSF11A,PTAFR,CFB,PTPRJ,ATP11A,MVP,CA2,DPP4,ADAP1,ARRDC4,CXCL16,PAPSS2,TSPAN3,SLC44A1,EFNA2,RASA4,PAK1,CD68,NOSTRIN,LY75,MXD1,STOM
Coexpression Atlas	gudmap_developingLowerUrinaryTract_e13.5_bladder epithelial cells_200	DevelopingLowerUrinaryTract_e13.5_bladder epithelial cells_emap-30875_top-relative-expression-ranked_200	Gudmap Mouse MOE430.2	1.38e-08	5.62e-05	1.78e-07	1.58e-06	21	166	MGAT4A,ATP8B1,LDOC1,TTR,POF1B,PLEKHH1,HOXD1,FXYD3,CLDN7,CDCP1,HAPLN1,TMEM45B,CCDC68,RASEF,OCLN,ABHD3,CA2,LGALS3,RASSF6,TSPAN8,TMPRSS2
Coexpression Atlas	GSM605837_500	Myeloid Cells, DC.8-4-11b-.Sp, CD45-APC CD11b-FITC CD11c-eFluor780 CD4-PE CD8a-eF, Spleen, avg-2	Immgen.org, GSE15907	1.43e-08	5.82e-05	1.84e-07	1.63e-06	33	375	HINT1,HLA-DMA,TMEM176A,PLAC8,CKB,S100A6,PIK3CB,CCL5,RBM47,TMEM176B,ANPEP,BHLHE40,ATF3,CTSS,NAAA,CYP27A1,GATM,BMP2,PTPN3,TMEM150B,ADAP1,ARRDC4,GPR35,CXCL16,TF,LGALS3,CD7,RASA4,PAK1,CD68,NOSTRIN,CDH17,STOM
Coexpression Atlas	GSM538262_500	Myeloid Cells, DC.8-4-11b+.MLN, CD11b-FITC CD4-PE CD11c-Alexa750 CD8a-PacificBlue, Lymph Node, avg-1	Immgen.org, GSE15907	1.45e-08	5.9e-05	1.85e-07	1.65e-06	35	414	TMEM176A,SEMA6D,PIK3CB,CCL5,RBM47,TMEM176B,ANPEP,ANXA4,VSIG10,BHLHE40,ATF3,CTSS,CYP27A1,TNFRSF11A,PTAFR,CFB,GUCD1,PTPRJ,ATP11A,MVP,CA2,NDNF,DPP4,ADAP1,ARRDC4,CXCL16,PAPSS2,TSPAN3,SLC44A1,RASA4,CD68,NOSTRIN,LY75,MXD1,STOM
Coexpression	MM1046	BOYLAN_MULTIPLE_MYELOMA_C_D_DN	M2:CGP: Chemical and Genetic Perturbations	1.54e-08	0.000148	7.74e-07	7.54e-06	26	302	ENPP1,TMEM176A,SQOR,LRG1,HOOK1,PIK3CB,AFP,CCL5,PLCB4,SELENOP,TMEM176B,CP,CLDN7,GDA,RHPN2,C15orf48,TTC39B,IQGAP2,GATM,ISG20,GGH,P4HA2,CD7,KIAA1217,RORA,EPCAM
Coexpression Atlas	gudmap_developingLowerUrinaryTract_e13.5_bladder epithelial cells_1000_k2	DevelopingLowerUrinaryTract_e13.5_bladder epithelial cells_emap-30875_k-means-cluster#2_top-relative-expression-ranked_1000	Gudmap Mouse MOE430.2	1.54e-08	6.26e-05	1.96e-07	1.75e-06	21	167	HEXB,ENPP1,TLCD4,MGAT4A,ATP8B1,PLEKHH1,RBM47,TMEM45B,ACSL5,SORL1,ABCC3,PRSS8,PAQR5,GCNT1,SEMA3B,NQO1,MARVELD3,GLB1L2,LGALS3,TRNT1,TMPRSS2
GO: Biological Process	GO:0006633	fatty acid biosynthetic process		1.55e-08	0.000104	2.63e-06	2.47e-05	23	197	CEACAM5,CEACAM7,MGLL,HNF4A,SCD,AGT,ALOX15B,PRXL2B,FA2H,APOA4,FADS6,TRIB3,PECR,INSIG1,ABHD3,CEACAM6,ACSS2,ELOVL2,CEACAM1,LPGAT1,HNF1A,NR1H3,MLXIPL
GO: Molecular Function	GO:0015293	symporter activity		1.56e-08	2.31e-05	3.29e-06	2.59e-05	21	160	FABP1,SLC39A4,SLC1A1,SLC6A8,SLC15A1,SLC22A5,SLC45A1,SLC36A1,SLC46A1,SLC36A2,SLC39A5,SLC38A3,SLC26A3,SLC11A2,SLC17A4,SLC25A22,SLC22A18,SLC16A4,SLC16A3,SLC39A14,SLC6A14
GO: Biological Process	GO:0045216	cell-cell junction organization		1.56e-08	0.000105	2.63e-06	2.47e-05	27	264	CEACAM5,CEACAM7,HNF4A,POF1B,AGT,CGN,UGT8,VEGFA,CAMSAP3,CLDN3,CLDN7,MUC13,LSR,CTNNA1,OCLN,CXADR,TJP3,CEACAM6,CDHR5,CEACAM1,GJB1,FZD5,MARVELD3,ACE2,INF2,CDH4,CDH17
Transcription Factor Binding Site	TATAAA_V$TATA_01	TATAAA_V$TATA_01	TFBS	1.65e-08	1.66e-05	2.37e-06	1.78e-05	54	1070	CDX1,CDX2,ENPP2,FOXA3,FABP1,CKB,HOXC6,MGAT3,SEMA6D,HOOK1,MTUS1,AFP,AGT,PLAG1,CCL5,ABCG2,MMP7,ALDOB,PLOD2,SEMA4B,SELENOP,DHRS11,DUOX2,CP,XK,POU4F1,ABCC6,SLC3A1,HAPLN1,SLCO2A1,RNF39,MASP1,GALNT3,TNFSF10,SPOCK2,GDNF,GJB1,SULT1B1,DMBT1,CA2,SLC27A2,HNF1A,TRIM2,RBP4,SYT7,RGS3,ABLIM1,ELMO3,GUCY2C,P4HA1,TM4SF4,RORA,ARHGEF2,SLC6A14
Coexpression	M19511	WANG_CISPLATIN_RESPONSE_AND_XPC_UP	C2:CGP: Chemical and Genetic Perturbations	1.65e-08	0.000159	8.28e-07	8.07e-06	20	185	PLEKHH1,SERPINA1,FGB,FXYD3,VTN,UBD,APOA2,MST1,SLC17A9,TNFSF9,INSIG1,CEACAM6,CFB,CEACAM1,SEMA3B,SLC27A2,GPX3,TF,SCARB1,TM4SF1
Coexpression	M4196	NUYTTEN_EZH2_TARGETS_UP	C2:CGP: Chemical and Genetic Perturbations	1.67e-08	0.000161	8.33e-07	8.12e-06	55	1033	RGMB,HK2,GCNT3,MGLL,KLF4,SQOR,NDRG1,PIK3CB,AGT,MMP7,CCL20,PLOD2,VEGFA,ANPEP,ANXA4,BHLHE40,TXNIP,SLC22A5,C15orf48,NT5C2,ATF3,ATP1B1,IL6R,MXI1,GALNT3,TNFSF10,ERAP1,PAQR5,IRF1,GBP3,ISG20,RETSAT,TRIM14,CEACAM1,CDC42SE2,FZD5,MVP,CPEB2,CA12,P4HA2,RCAN1,ARRDC4,OAS3,LAMC2,TSPAN3,LGALS3,ACE2,SLC16A3,P4HA1,KIAA1217,SCARB1,TSPAN8,PAM,MXD1,STOM
GO: Biological Process	GO:0046890	regulation of lipid biosynthetic process		1.69e-08	0.000114	2.78e-06	2.61e-05	27	265	CEACAM5,CEACAM7,HNF4A,FAM3D,CLCN2,AGT,SMPD3,APOA4,APOB,PPARA,IGF2,TRIB3,PRKCD,ATP1A1,DGAT1,ACSL5,INSIG1,CEACAM6,CEACAM1,BMP2,LPGAT1,TCF7L2,NR1H3,MLXIPL,MALRD1,SCARB1,PC
Coexpression Atlas	gudmap_developingKidney_e15.5_early proxim tubul_200_k4	DevelopingKidney_e15.5_early proxim tubul_emap-28005_k-means-cluster#4_top-relative-expression-ranked_200	Gudmap Mouse MOE430.2	1.73e-08	7.02e-05	2.19e-07	1.94e-06	9	25	TTR,AFP,FGB,APOA1,APOA4,APOB,CFB,APOM,DPEP1
Coexpression Atlas	gudmap_developingKidney_e15.5_S-shaped body_100_k2	DevelopingKidney_e15.5_S-shaped body_emap-27855_k-means-cluster#2_top-relative-expression-ranked_100	Gudmap Mouse MOE430.2	1.73e-08	7.02e-05	2.19e-07	1.94e-06	9	25	HNF4A,ALDOB,RBM47,KIF12,GGT1,APOM,TINAG,DPP4,AMN
Coexpression Atlas	gudmap_developingLowerUrinaryTract_adult_bladder_500	DevelopingLowerUrinaryTract_adult_bladder_emap-29457_top-relative-expression-ranked_500	Gudmap Mouse MOE430.2	1.74e-08	7.06e-05	2.19e-07	1.95e-06	33	378	RGMB,GCNT3,ENPP1,TLCD4,MGAT4A,ATP8B1,PFKP,TTR,POF1B,S100A6,CLIC5,PLCB4,FBXO32,FXYD3,ANG,ANXA4,CXCL14,CP,GDA,TMEM45B,ABCC3,PAQR5,BMP2,NQO1,CPEB2,DPEP1,TPPP,TF,LGALS3,GREM2,TSPAN8,TMPRSS2,RORA
Coexpression Atlas	BM Top 100 - thyroid gland	BM Top 100 - thyroid gland	Body Map	1.78e-08	7.24e-05	2.24e-07	1.99e-06	14	73	ENPP1,ATP8B1,SCNN1A,RBM47,EPB41L4B,DUOX2,CLDN3,RASEF,NPNT,RAB25,GPX3,TNFRSF11B,TFF3,EPCAM
Coexpression Atlas	gudmap_developingKidney_e15.5_500_k2	DevelopingKidney_e15.5_anlage of loop of Henle_emap-31283_k-means-cluster#2_top-relative-expression-ranked_500	Gudmap Mouse MOE430.2	1.86e-08	7.57e-05	2.34e-07	2.08e-06	13	62	TFCP2L1,UGT8,SGPP2,CLDN3,ATP1B1,MUC1,PRDM16,SORL1,WSCD1,LGALS3,RASSF6,TSPAN8,CDH16
Coexpression Atlas	GSM605850_500	Myeloid Cells, MF.II-480hi.PC, F4/80hi CD115hi CD11b+ MHC II- CD11c-, Peritoneal Cavity, avg-3	Immgen.org, GSE15907	1.86e-08	7.59e-05	2.34e-07	2.08e-06	36	438	HGD,TMEM176A,SQOR,LRG1,MTUS1,FCGRT,PLAUR,RBM47,FLNB,SELENOP,TMEM176B,ANXA4,CP,GDA,RAB11FIP5,CTSS,ABCC3,PTAFR,TMBIM1,CFB,CEACAM1,GGH,SULT1A1,CALML4,ADAP1,TCN2,TF,CRYL1,SLC44A1,P2RX4,GUSB,ARHGAP12,SERPINB1,CD68,PAM,STOM
Coexpression	M8901	LANDIS_ERBB2_BREAST_TUMORS_324_DN	C2:CGP: Chemical and Genetic Perturbations	1.87e-08	0.00018	9.26e-07	9.03e-06	18	151	EPHX2,KLF4,SQOR,PLAC8,S100A6,MFNG,CIDEC,DGAT1,BCKDHB,HEPH,SULT1A1,CHPT1,DPEP1,GPX3,NR1H3,PAPSS2,CD151,RSPO1
Coexpression Atlas	gudmap_dev gonad_e13.5_F_SupCellPrec_Sry_1000	dev gonad_e13.5_F_SupCellPrec_Sry_top-relative-expression-ranked_1000	Gudmap Mouse ST 1.0	1.89e-08	7.7e-05	2.36e-07	2.1e-06	53	804	ENPP2,SERPINF1,KLF4,ME1,SQOR,SIAE,CLCN2,SEMA6D,MTA3,HPCAL1,CGN,PLAG1,VEGFA,USP53,ANPEP,ANXA4,CAMSAP3,PPARA,SEMA4G,IGF2,PRKCD,PCP4L1,ATF3,ATP1B1,NAAA,MYO1A,ARHGAP26,ABHD3,GATM,GDPD2,RNF43,BMP2,CHPT1,NPNT,GRIK3,GLB1L2,SH3D21,TFRC,CRYL1,C1orf115,EFNA1,P2RX4,SLC16A4,LMO7,PCSK6,ARHGAP12,PAM,CD151,PRR15,LY75,HSD17B11,RSPO1,STOM
Coexpression Atlas	PCBC_ratio_EB-fibro_vs_EB-cbCD34_500	ratio_EmbryoidBody-fibro_vs_EmbryoidBody-derived-from_CD34-iPSC_top-relative-expression-ranked_500	PCBC	1.93e-08	7.87e-05	2.41e-07	2.14e-06	38	479	F2,HNF4A,FABP1,MEP1A,HAVCR1,SERPINA1,AFP,HPN,FGB,PLG,SERPINF2,ALOX15B,VIL1,VTN,SLC39A4,APOA1,APOA2,APOA4,APOB,SLC3A1,SLC15A1,URAD,IL2RG,PRSS3,CDHR5,ITGB2,LCN15,SLC39A5,GNRH2,RAB17,AMN,TMPRSS6,RBP4,SLC44A4,TF,TFF3,CCDC183,CDH17
Coexpression Atlas	gudmap_developingKidney_e15.5_Proximal Tubules_500_k5	DevelopingKidney_e15.5_Proximal Tubules_emap-28005_k-means-cluster#5_top-relative-expression-ranked_500	Gudmap Mouse MOE430.2	1.95e-08	7.94e-05	2.42e-07	2.15e-06	18	125	HNF4A,MEP1A,RBM47,PLS1,UNC5CL,MYO6,KIF12,PBLD,GCNT1,STEAP2,ELOVL2,GUCD1,DPP4,MAP7,SGK2,MLXIPL,ENTPD5,ENTPD8
Coexpression	MM1084	LANDIS_BREAST_CANCER_PROGRESSION_DN	M2:CGP: Chemical and Genetic Perturbations	1.96e-08	0.000189	9.69e-07	9.45e-06	13	75	EPHX2,KLF4,SQOR,PLAC8,S100A6,MFNG,CIDEC,DGAT1,BCKDHB,HEPH,SULT1A1,DPEP1,NR1H3
Coexpression Atlas	GSM854285_500	Myeloid Cells, DC.8-4-11b+.SLN, CD45-APC CD11b-FITC CD11c-eFluor780 CD4-PE CD8a-eF, Lymph Node, avg-2	Immgen.org, GSE15907	1.96e-08	7.99e-05	2.43e-07	2.16e-06	35	419	TMEM176A,SEMA6D,CCL5,TMEM176B,ANPEP,ANXA4,VSIG10,BHLHE40,ZFP36,GDA,ATF3,CTNNA1,FXYD2,CTSS,CYP27A1,TNFRSF11A,PTAFR,CFB,ATP11A,MVP,NDNF,ADAP1,GALNT12,CXCL16,PAPSS2,TSPAN3,SLC44A1,EFNA2,RASA4,SERPINB1,CD68,NOSTRIN,LY75,MXD1,STOM
Coexpression Atlas	GSM777059_500	Stromal Cells, LEC.MLN, gp38+ CD31+, Lymph Node, avg-4	Immgen.org, GSE15907	1.98e-08	8.05e-05	2.44e-07	2.17e-06	36	439	TSPAN15,ENPP2,TMEM176A,MGLL,KLF4,ME1,LRG1,NDRG1,FCGRT,SCD,CCL20,SELENOP,TMEM176B,ANPEP,CP,BHLHE40,PLPP3,ATF3,NAAA,TNFSF10,RAPGEF5,TNFRSF11A,CFB,BMP2,NQO1,RCAN1,TCN2,ARRDC4,LAMC2,TGFBR3,EFNA1,RASSF6,SUSD2,PAM,CD151,TM4SF1
GO: Biological Process	GO:0006066	alcohol metabolic process		2.01e-08	0.000136	3.23e-06	3.03e-05	36	436	EPHX2,ENPP1,TTR,CLCN2,NPC1L1,DEGS2,HSD17B7,MOGAT2,SGPP2,APOA1,APOA2,APOA4,APOB,PLPP3,MTTP,MOGAT3,IPMK,DGAT1,TTC39B,PECR,NAAA,CYP3A5,INSIG1,CYP27A1,PTAFR,ACSS2,RETSAT,APOBR,ITPKA,BMP2,SULT1B1,SULT1A1,HNF1A,SRD5A3,RBP4,SCARB1
Coexpression	M46416	KOHN_EMT_EPITHELIAL	C2:CGP: Chemical and Genetic Perturbations	2.13e-08	0.000205	1.05e-06	1.02e-05	8	22	CLDN3,CLDN7,TJP3,PRSS8,MARVELD3,RAB25,ADAP1,LLGL2
Coexpression Atlas	PCBC_EB_1000	Progenitor-Cell-Biology-Consortium_EmbryoidBody_top-relative-expression-ranked_1000	PCBC	2.15e-08	8.74e-05	2.64e-07	2.35e-06	61	994	CDX2,TMEM176A,F2,TTR,FABP1,MEP1A,TMEM132C,HAVCR1,SERPINA1,HOXC6,CLIC5,SEMA6D,SH3RF2,AFP,PCDH19,AGT,FGB,SMPD3,PLG,VIL1,VTN,TMEM176B,UBD,SGPP2,CXCL14,APOA1,APOA2,POU4F1,APOA4,APOB,CLDN3,IGF2,FRZB,MTTP,URAD,TJP3,KIF12,GDNF,ELOVL2,ITIH2,HAGLR,NELL2,LCN15,TMEM163,GNRH2,NPNT,NDNF,INHBE,RBP4,GRIK3,USH1C,TF,NSUN7,GREM2,ORM1,ABCC6P1,EFNA2,TM4SF4,TMPRSS2,RSPO1,CDH17
Transcription Factor Binding Site	M30001	HMG20B_TARGET_GENES	MSigDB	2.17e-08	2.19e-05	2.73e-06	2.05e-05	81	1939	RGMB,TMEM144,SYN3,SERPINF1,ST6GALNAC6,F2,SQOR,SIAE,SERPINA1,AP2A2,MTUS1,AFP,HPN,AGT,ABCG2,ABCC2,CCL20,PLG,GLTPD2,PLS1,SELENOP,EPB41L4B,FA2H,ANXA4,FLVCR1,SH3KBP1,KIF16B,MYO18A,APOA1,APOA2,APOB,VSIG10,BHLHE40,TDP2,SLC51B,TRIB3,ATF3,ATP1B1,STX16,MOGAT3,IL6R,ACSL5,MXI1,MASP1,IQGAP2,ERAP1,NOXA1,SRI,BCKDHB,GCHFR,ISG20,RILP,SEMA3B,DIAPH1,CA2,HNF1A,INHBE,TRIM2,RCAN1,GPX2,RBP4,NR1H3,RHOT2,PTPN18,SYT7,TF,R…
GO: Biological Process	GO:0001894	tissue homeostasis		2.18e-08	0.000147	3.41e-06	3.2e-05	34	398	CEACAM5,ENPP1,CEACAM7,ADORA1,VEGFA,CLDN3,MUC13,SLC1A1,ABCC6,LSR,SLC22A5,CTNNA1,OCLN,MUC4,CTSS,CXADR,TJP3,CEACAM6,PBLD,TNFRSF11A,CEACAM1,CA2,HNF1A,TCF7L2,RBP4,LAMA2,USH1C,TF,TNFRSF11B,TFF2,TFF3,TFRC,CD7,P2RX4
Coexpression Atlas	Arv_SC-HD_500_K2	AravindRamakr_StemCell-HD_top-relative-expression-ranked_500_k-means-cluster#2	PCBC	2.22e-08	9.02e-05	2.72e-07	2.42e-06	18	126	CEACAM7,FABP1,MEP1A,ALDOB,TMEM253,APOA4,MUC13,MYO1A,CDHR5,EPS8L3,DMBT1,PHGR1,SLC39A5,SLC26A3,USH1C,LGALS4,TSPAN8,CDH17
Coexpression Atlas	GSM854241_500	Myeloid Cells, DC.103+11b-.Lu, MHCII+ CD11c+ CD103+ CD11b, Lung, avg-2	Immgen.org, GSE15907	2.31e-08	9.41e-05	2.83e-07	2.51e-06	34	402	HLA-DMA,CYP2S1,PFKP,KLF4,CKB,SEMA6D,FCGRT,PIK3CB,SCD,QPCT,CCL5,RBM47,ANPEP,ANXA4,BHLHE40,ZFP36,C15orf48,ATF3,CTNNA1,CTSS,NAAA,TNFSF9,CYP27A1,NAGA,GATM,SULT1A1,CXCL16,TF,LGALS3,PAK1,CD68,NOSTRIN,LY75,EPCAM
Coexpression Atlas	GSM605834_500	Myeloid Cells, DC.8-4-11b-.MLN, CD11b-FITC CD4-PE CD11c-Alexa750 CD8a-PacificBlue, Lymph Node, avg-2	Immgen.org, GSE15907	2.46e-08	0.0001	2.99e-07	2.66e-06	34	403	TMEM176A,SEMA6D,PIK3CB,CCL5,RBM47,TMEM176B,ANPEP,ANXA4,VSIG10,BHLHE40,CTNNA1,CYP27A1,GATM,IRF1,TNFRSF11A,CFB,PTPN3,GUCD1,ATP11A,MVP,CA2,DPP4,ADAP1,ARRDC4,SLC26A2,CXCL16,PAPSS2,TSPAN3,SLC44A1,SERPINB1,NOSTRIN,LY75,MXD1,STOM
Coexpression Atlas	GSM605820_500	Myeloid Cells, DC.103+11b-.PolyIC.Lu, CD45 MHCII CD11c CD103 CD11b, Lung, avg-3	Immgen.org, GSE15907	2.54e-08	0.000103	3.09e-07	2.74e-06	33	384	HK2,HLA-DMA,PFKP,KLF4,CKB,TBC1D32,PIK3CB,QPCT,CCL5,RBM47,ANPEP,BHLHE40,ZFP36,GDA,C15orf48,ATF3,TTC39B,NAAA,TNFSF9,CYP27A1,NAGA,GATM,SULT1A1,ARRDC4,CXCL16,TF,LGALS3,PAK1,CD68,NOSTRIN,LY75,EPCAM,STOM
Coexpression Atlas	Arv_SC-H9hpx_1000_K5	AravindRamakr_StemCell-H9hpx_top-relative-expression-ranked_1000_k-means-cluster#5	PCBC	2.6e-08	0.000106	3.15e-07	2.8e-06	39	505	SYN3,RIMKLA,B3GALT5,CYP2S1,FOXA3,HPN,SCNN1A,RBM47,CXCL5,LRRC75A,ALPG,VIL1,EPB41L4B,CLDN3,LSR,C1orf226,IGSF1,MUC3A,MUC4,TJP3,PRSS8,LGALS14,GDPD2,TNFRSF11A,NR1I2,COBL,MARVELD3,B4GALNT3,INHBE,RAB17,CECR2,B3GNT7,MAP7,SLC44A4,USH1C,NSUN7,MLXIPL,TMPRSS2,EPCAM
Coexpression	M8475	WANG_ESOPHAGUS_CANCER_VS_NORMAL_UP	C2:CGP: Chemical and Genetic Perturbations	2.61e-08	0.000252	1.28e-06	1.25e-05	16	121	MEP1A,MMP7,PLS1,ANXA4,AGPAT2,IFNGR1,ATF3,GALNT3,SRI,GBP3,MTMR11,TCF7L2,GPX2,TRIM31,RGS3,SLC16A4
GO: Biological Process	GO:0060249	anatomical structure homeostasis		2.62e-08	0.000176	4.01e-06	3.77e-05	34	401	CEACAM5,ENPP1,CEACAM7,ADORA1,VEGFA,CLDN3,MUC13,SLC1A1,ABCC6,LSR,SLC22A5,CTNNA1,OCLN,MUC4,CTSS,CXADR,TJP3,CEACAM6,PBLD,TNFRSF11A,CEACAM1,CA2,HNF1A,TCF7L2,RBP4,LAMA2,USH1C,TF,TNFRSF11B,TFF2,TFF3,TFRC,CD7,P2RX4
Coexpression	MM1039	MARTINEZ_TP53_TARGETS_UP	M2:CGP: Chemical and Genetic Perturbations	2.67e-08	0.000256	1.3e-06	1.26e-05	42	693	CEACAM5,SERPINF1,CEACAM7,ME1,LRG1,FABP1,NDRG1,SCD,PRR13,QPCT,CCL20,SH3KBP1,CXCL14,CP,APOA4,TXNIP,MISP,IGF2,CIDEC,SLC22A5,ATF3,FUT2,SDCBP2,IL2RG,SOD3,CEACAM6,GBP3,CEACAM1,CHPT1,SLC11A2,ARRDC4,LAMA2,TF,TSPAN3,TFRC,LGALS9,TGFBR3,SLC35A3,PCSK6,SERPINB1,PC,STOM
Coexpression Atlas	GSM854255_500	Myeloid Cells, DC.103-11b+.LuLN, MHCII+ CD11c+ CD8- CD11b+ CD103-, Lymph Node, avg-3	Immgen.org, GSE15907	2.76e-08	0.000112	3.34e-07	2.97e-06	32	366	TMEM176A,SEMA6D,CCL5,TMEM176B,ANPEP,ANXA4,VSIG10,BHLHE40,ZFP36,GDA,ATF3,CTNNA1,CTSS,CYP27A1,TNFRSF11A,PTAFR,CFB,MVP,NDNF,ADAP1,ARRDC4,CXCL16,PAPSS2,TSPAN3,SLC44A1,RASA4,SERPINB1,CD68,NOSTRIN,LY75,MXD1,STOM
Coexpression	M19622	LEONARD_HYPOXIA	C2:CGP: Chemical and Genetic Perturbations	2.78e-08	0.000268	1.35e-06	1.31e-05	10	41	PFKP,F3,AK4,VEGFA,BHLHE40,MUC1,P4HA2,EFNA1,SLC16A3,P4HA1
GO: Biological Process	GO:0042886	amide transport		2.79e-08	0.000188	4.17e-06	3.92e-05	38	482	F2,HNF4A,FAM3D,ADORA1,CAMK2N1,AGT,FGB,CCL5,ABCG2,SMPD3,MMP7,GLTPD2,SIRT6,CPT1A,SLC1A1,SLC3A1,SLC15A1,MTTP,RAB11FIP5,C1QTNF12,DGAT1,MYO6,SRI,PDX1,SLC46A1,GIPR,BMP8B,SLC38A3,CA2,HNF1A,DPYSL2,TCF7L2,RBP4,SLC19A3,SYT7,SLC25A22,PAK1,CDH17
Coexpression Atlas	GSM777043_500	Stromal Cells, Fi.MTS15+.Th, CD45- PDGFRa+ MTS15+, Thymus, avg-3	Immgen.org, GSE15907	2.8e-08	0.000114	3.37e-07	3e-06	36	445	TSPAN15,RGMB,SLCO2B1,ENPP2,SERPINF1,TMEM176A,ATP8B1,KLF4,F3,SCD,PCDH19,PLCB4,PLOD2,VTN,TMEM176B,ANPEP,CXCL14,CP,BHLHE40,PLPP3,ATF3,SOD3,RAPGEF5,CFB,IGSF10,BMP2,DPEP1,GPX3,LAMA2,PAPSS2,TGFBR3,RNASE4,SUSD2,SH3D19,PAM,TM4SF1
Coexpression	M40019	BUSSLINGER_GASTRIC_X_CELLS	C8: Cell Type Signature	2.84e-08	0.000273	1.37e-06	1.33e-05	20	191	ENPP1,TMEM176A,TTR,SERPINA1,HPN,FLNB,VTN,TMEM176B,APOA1,ATF3,KIF13B,ARRDC4,C12orf75,GPX3,USH1C,PAPSS2,SYT7,MLXIPL,RASA4,TM4SF4
Coexpression	M1999	WONG_ADULT_TISSUE_STEM_MODULE	C2:CGP: Chemical and Genetic Perturbations	2.87e-08	0.000276	1.37e-06	1.34e-05	43	721	HLA-DMA,SERPINF1,TMEM176A,KLF4,FOXA3,HNF4A,F3,S100A6,MFNG,NDRG1,SCD,CCL5,ABCG2,FLNB,TMEM176B,EPB41L4B,CXCL14,MUC13,BHLHE40,SLC1A1,IFNGR1,TRIB3,PLPP3,RAB11FIP5,PCP4L1,ATF3,C1QTNF12,MUC4,SORL1,GATM,IRF7,APOBR,TMBIM1,IGSF10,STBD1,LAMA2,MAP7,TNFRSF11B,USP2,P2RX4,LRP4,RORA,LY75
Coexpression	M40158	DESCARTES_FETAL_CEREBELLUM_VASCULAR_ENDOTHELIAL_CELLS	C8: Cell Type Signature	2.97e-08	0.000286	1.42e-06	1.38e-05	40	644	CARD10,ATP8B1,ACVRL1,KLF4,MELTF,CLIC5,QPCT,ABCG2,DEGS2,ANPEP,XPNPEP2,BHLHE40,LSR,SHROOM1,IGF2,TMEM45B,DOK4,SLCO2A1,TMEM37,RAB11FIP5,OCLN,IQGAP2,GBP3,ITPR3,SULT1B1,TMEM92,SLC38A3,CA2,DPEP1,SLC26A2,ATP10A,RGS3,TFRC,C1orf115,EFNA1,EVA1B,INF2,CDA,NOSTRIN,TM4SF1
GO: Biological Process	GO:2000145	regulation of cell motility		2.98e-08	0.000201	4.37e-06	4.1e-05	75	1338	PCSK5,CEACAM5,ENPP2,SERPINF1,CEACAM7,CARD10,ACVRL1,KLF4,HNF4A,F3,ADORA1,MGAT3,SEMA6D,MTUS1,SH3RF2,PIK3CB,AGT,CCL5,SMPD3,MMP7,CCL20,PLG,ALOX15B,OSGIN1,VEGFA,DUOXA2,VIL1,SEMA4B,VTN,EPB41L4B,CAMSAP3,DUOX2,CXCL14,CLDN3,CLDN7,SEMA4G,MST1,IGF2,PLPP3,CTNNA1,MAPK3,IL6R,SORL1,CEACAM6,SPOCK2,GCNT1,PTAFR,CEACAM1,IGSF10,BMP2,PTPRJ,SEMA3B,DIAPH1,MARVELD3,DPEP1,DPP4,DPYSL2,RAB25,LAMA2,LAMC2,CXCL16,TF,LGALS3,TF…
GO: Cellular Component	GO:0099503	secretory vesicle		3.01e-08	1.88e-05	8.55e-07	6e-06	71	1248	HEXB,PCSK5,AOC1,SYN3,SNAP47,TTR,LRG1,PLAC8,SERPINA1,SERPINA4,AP2A2,SCNN1A,FGB,QPCT,PLAUR,PLG,SERPINF2,FER1L5,VEGFA,SELENOP,ANG,ANPEP,AGPAT2,TMPRSS4,APOA1,IGF2,SLC17A9,CADPS,RAB11FIP5,PRKCD,CTNNA1,ATP1A1,STX16,MCTP2,CTSS,CXADR,DGAT1,PRSS3,IQGAP2,SRI,CEACAM6,PTAFR,ITGB2,TMBIM1,CEACAM1,ITPR3,GGH,PTPRJ,DIAPH1,TMEM163,ATP11A,DMBT1,RAB3B,MVP,SLC27A2,STBD1,TCN1,SYT7,TF,LGALS3,TFF3,ORM1,GUSB,SERPINB1,CD6…
Coexpression	M1936	MEISSNER_NPC_HCP_WITH_H3_UNMETHYLATED	C2:CGP: Chemical and Genetic Perturbations	3.06e-08	0.000294	1.45e-06	1.41e-05	36	544	CDX1,TFCP2L1,CLDN3,FADS6,CLDN7,CDCP1,SLC1A1,SLC9A3,SHROOM1,FAR2,SLCO2A1,TMEM37,RASEF,ARHGAP27,SLC45A1,ATP2A3,PAQR5,GCNT1,ITGB4,NAGS,BMP8B,MARVELD3,TTC22,RAB3B,AMN,GPX3,LAMC2,CXCL16,SH3D21,LGALS3,PLLP,C1orf115,EVA1B,SLC16A3,TMPRSS2,PRR15
Coexpression Atlas	gudmap_kidney_adult_JuxtaGlom_Ren1_k1_200	kidney_adult_JuxtaGlom_Ren1_k-means-cluster#1_top-relative-expression-ranked_200	Gudmap Mouse MOE430.2	3.06e-08	0.000124	3.65e-07	3.25e-06	14	76	ENPP2,NDRG1,SCNN1A,SELENOP,ATP1B1,FXYD2,GATM,GCNT1,GGT1,SLC27A2,TCN2,GPX3,TMPRSS2,CDH16
Coexpression Atlas	BM Top 100 - prostate gland	BM Top 100 - prostate gland	Body Map	3.06e-08	0.000124	3.65e-07	3.25e-06	14	76	AOC1,ATP8B1,SCNN1A,FXYD3,RBM47,ANPEP,CLDN3,RASEF,STEAP2,DPP4,SLC44A4,TSPAN8,TMPRSS2,EPCAM
Coexpression Atlas	gudmap_developingLowerUrinaryTract_P2_bladder stroma (LCM)_500	DevelopingLowerUrinaryTract_P2_bladder stroma (LCM)_emap-30396_top-relative-expression-ranked_500	Gudmap Mouse MOE430.2	3.06e-08	0.000125	3.65e-07	3.25e-06	33	387	GCNT3,ENPP2,ATP8B1,KLF4,SQOR,TTR,POF1B,S100A6,CLIC5,AFP,FXYD3,ANXA4,CXCL14,CP,GDA,TMEM45B,FXYD2,ABCC3,CYP3A5,PAQR5,CFB,SLC27A2,DPEP1,NTRK1,RBP4,LAMA2,ATP10A,LGALS3,GREM2,SLC44A1,TSPAN8,SERPINB1,TMPRSS2
Coexpression Atlas	Facebase_RNAseq_ratio_e9.5_MaxillaryArch_vs_Mandibular_2500_K3	FacebaseRNAseq_ratio_e9.5_MaxillaryArch_vs_Mandibular_top-relative-expression-ranked_2500_k-means-cluster#3	FaceBase_RNAseq	3.07e-08	0.000125	3.65e-07	3.25e-06	29	311	MGAT4A,MTUS1,CGN,PLS1,LRRC75A,TMEM176B,CAMSAP3,CLDN7,CDCP1,CLSTN1,CCDC68,SORL1,TTC39B,PRSS8,MYO1D,SPOCK2,BMP2,KLF5,TMEM163,NPNT,RAB25,MAP7,KLC4,PAPSS2,GREM2,SLC44A1,LMO7,ENTPD5,EPCAM
Coexpression	M2176	ROY_WOUND_BLOOD_VESSEL_DN	C2:CGP: Chemical and Genetic Perturbations	3.2e-08	0.000308	1.51e-06	1.47e-05	8	23	ERBB3,ATP8B1,EPB41L4B,ATP1B1,CEACAM6,RNF43,KLF5,SLC6A14
Coexpression Atlas	gudmap_kidney_e15.5_Podocyte_MafB_k4_200	kidney_e15.5_Podocyte_MafB_k-means-cluster#4_top-relative-expression-ranked_200	Gudmap Mouse MOE430.2	3.4e-08	0.000138	4.03e-07	3.58e-06	13	65	ENPP2,MEP1A,ALDOB,ANPEP,FXYD2,GCNT1,TINAG,CLRN3,CALML4,SLC27A2,ACE2,EPCAM,CDH16
GO: Molecular Function	GO:0015294	solute:monoatomic cation symporter activity		3.43e-08	5.06e-05	6.32e-06	4.98e-05	18	124	FABP1,SLC39A4,SLC1A1,SLC6A8,SLC15A1,SLC45A1,SLC36A1,SLC46A1,SLC36A2,SLC39A5,SLC38A3,SLC26A3,SLC11A2,SLC17A4,SLC25A22,SLC16A3,SLC39A14,SLC6A14
Coexpression	MM1099	LANDIS_ERBB2_BREAST_TUMORS_324_DN	M2:CGP: Chemical and Genetic Perturbations	3.45e-08	0.000332	1.62e-06	1.58e-05	18	157	EPHX2,KLF4,SQOR,PLAC8,S100A6,MFNG,CIDEC,DGAT1,BCKDHB,HEPH,SULT1A1,CHPT1,DPEP1,GPX3,NR1H3,PAPSS2,CD151,RSPO1
Coexpression Atlas	gudmap_developingKidney_e15.5_ureter tip_flank cortic collct_500_k4	DevelopingKidney_e15.5_ureter tip_flank cortic collct_emap-27752_k-means-cluster#4_top-relative-expression-ranked_500	Gudmap Mouse MOE430.2	3.45e-08	0.000141	4.08e-07	3.63e-06	15	89	GCNT3,PLAC8,S100A6,TFCP2L1,UGT8,RNF186,HKDC1,OCLN,MUC1,SORL1,NPNT,GLB1L2,TFRC,EPCAM,CDH16
Coexpression Atlas	gudmap_RNAseq_p2_CD2APMEISWT_2500_K4	gudmap_RNAseq_p2_CD2APMEISWT_2500_K4	Gudmap RNAseq	3.46e-08	0.000141	4.08e-07	3.63e-06	54	842	ACHE,CKB,S100A6,ADORA1,HOXC6,CAMK2N1,NDRG1,FCGRT,FBXO32,FOXD2,ANG,CORO2A,CP,PPARA,ZFP36,TXNIP,AATK,SLCO2A1,PCP4L1,ATF3,ATP2A3,IL2RG,CTSS,IL6R,SOD3,TTC39B,PAG1,MYO1D,CYP27A1,HCAR1,IRF7,RILP,TRIM14,CFB,VILL,CALML4,MVP,STBD1,TCN2,NR1H3,CXCL16,GLB1L2,TF,TGFBR3,RNASE4,P2RX4,LMO7,RASSF6,SUSD2,SERPINB1,CD151,NOSTRIN,TM4SF1,PCDH1
Coexpression Atlas	gudmap_developingLowerUrinaryTract_e15.5_Urothelium_200_k3	DevelopingLowerUrinaryTract_e15.5_Urothelium_emap-28091_k-means-cluster#3_top-relative-expression-ranked_200	Gudmap Mouse MOE430.2	3.47e-08	0.000141	4.08e-07	3.63e-06	10	35	MGAT4A,ATP8B1,FAM3D,POF1B,CLDN3,TMEM45B,ABCC3,LGALS3,TSPAN8,TMPRSS2
Coexpression	M9032	MOHANKUMAR_HOXA1_TARGETS_DN	C2:CGP: Chemical and Genetic Perturbations	3.51e-08	0.000338	1.64e-06	1.6e-05	19	175	MGLL,CKB,S100A6,FXYD3,TXNIP,SLCO2A1,RNF39,MUC1,FAM83E,CEACAM6,FAXDC2,STEAP2,NELL2,RAB3B,CA2,GPX2,GALNT12,LAMC2,TFF3
Coexpression Atlas	PCBC_ratio_SC_vs_ECTO_1000	ratio_StemCell_vs_induced-Ectoderm_top-relative-expression-ranked_1000	PCBC	3.55e-08	0.000145	4.17e-07	3.71e-06	60	984	HK2,RIMKLA,B3GALT5,CYP2S1,HNF4G,TUBA4A,AFP,SCD,SCNN1A,UGT8,HRH2,AK4,SERPINF2,CXCL5,PLOD2,PLS1,LRRC75A,ALPG,VIL1,VIPR1,VIPR2,EPB41L4B,AGPAT2,VSIG10,CDCP1,ZFYVE28,SLC15A1,SLC17A9,IGSF1,MUC3A,MUC4,ATP2A3,CYP2B6,GALNT3,MYO1D,INSIG1,PAQR5,TNFRSF11A,PTAFR,STEAP2,TRIM14,ITPR3,CA12,DPP4,INHBE,RAB17,GPX2,B3GNT7,GRIK3,ATP10A,TFF3,TFRC,ORM1,MLXIPL,PLLP,SUSD2,SCARB1,LY75,EPCAM,PCDH1
Coexpression Atlas	Facebase_RNAseq_e10.5_Medial Nasal Eminence_2500_K3	FacebaseRNAseq_e10.5_Medial Nasal Eminence_top-relative-expression-ranked_2500_k-means-cluster#3	FaceBase_RNAseq	3.67e-08	0.000149	4.29e-07	3.81e-06	27	277	MGAT4A,F3,MTUS1,CGN,FXYD3,PLS1,TMEM176B,CLDN7,CDCP1,CLSTN1,RHPN2,CCDC68,TTC39B,MYO1D,SPOCK2,BMP2,KLF5,TMEM163,SLC27A2,NPNT,RAB25,PAPSS2,GREM2,SLC44A1,LMO7,PCSK6,EPCAM
Coexpression Atlas	stomach	stomach	Human Protein Atlas	3.74e-08	0.000152	4.37e-07	3.88e-06	20	160	CYP2S1,FOXA3,HNF4A,FER1L6,FA2H,UNC5CL,MUC1,FAM83E,CAPN8,GIPR,SULT1B1,VILL,NQO1,EPS8L3,B4GALNT3,CA2,TRIM31,TFF2,RASSF6,RFLNA
Coexpression Atlas	GSM854322_500	Myeloid Cells, MF.Medl.SLN, CD11b+ CD169+ F4/80+, Lymph Node, avg-2	Immgen.org, GSE15907	3.92e-08	0.00016	4.56e-07	4.05e-06	33	391	TMEM176A,SQOR,LRG1,PLAC8,S100A6,MTUS1,SCD,CCL5,PLAUR,RBM47,SELENOP,TMEM176B,ANXA4,AOAH,CP,GDA,ATF3,CTSS,IL6R,NAAA,CYP27A1,IRF7,PTAFR,CFB,CEACAM1,GPR35,OAS3,NR1H3,TF,LGALS3,SCARB1,CD68,STOM
Coexpression Atlas	gudmap_developingLowerUrinaryTract_e13.5_bladder epithelial cells_1000_k5	DevelopingLowerUrinaryTract_e13.5_bladder epithelial cells_emap-30875_k-means-cluster#5_top-relative-expression-ranked_1000	Gudmap Mouse MOE430.2	4.03e-08	0.000164	4.68e-07	4.16e-06	15	90	GCNT3,ME1,TTR,PLEKHH1,S100A6,FXYD3,FA2H,SDCBP2,PAQR5,ITIH2,CPEB2,LAMC2,LACTB2,SH3D19,TMPRSS2
GO: Biological Process	GO:0055082	intracellular chemical homeostasis		4.04e-08	0.000272	5.79e-06	5.44e-05	56	886	HEXB,HK2,ENPP1,SERPINF1,FOXA3,F2,CKB,ADORA1,MELTF,CAMK2N1,PIK3CB,AGT,SCNN1A,CCL5,PLCB4,ABCC2,ANG,ERO1A,FLVCR1,HKDC1,CP,SLC39A4,XK,CLSTN1,SLC1A1,ABCC6,SLC9A3,RAB11FIP5,MAPK3,ATP1A1,C1QTNF12,ATP1B1,FXYD2,ATP2A3,SRI,PDX1,SLC46A1,STEAP2,ITPR3,DIAPH1,SLC39A5,SLC38A3,CA2,HNF1A,SLC26A3,TCF7L2,KCNE3,SLC11A2,NOL3,TMPRSS6,ATP13A2,TF,TFRC,CNNM4,MLXIPL,SLC39A14
Coexpression Atlas	gudmap_dev gonad_e13.5_M_gudmap_devVasTestis_Flk_1000	dev gonad_e13.5_M_DevVasTestis_Flk_top-relative-expression-ranked_1000	Gudmap Mouse ST 1.0	4.05e-08	0.000165	4.68e-07	4.16e-06	54	846	HEXB,TSPAN15,MGLL,GOLM1,ACVRL1,ME1,SQOR,MFNG,SEMA6D,SCD,PLCB4,ABCG2,TMEM164,RBM47,SELENOP,HSD17B7,AGPAT2,BHLHE40,ZFP36,HAPLN1,IFNGR1,IGF2,DOK4,PLPP3,SLCO2A1,ATF3,ARHGAP27,IL2RG,CTSS,MASP1,IQGAP2,MYO6,RAPGEF5,GATM,DIAPH2,TACC1,CPEB2,KCNE3,RBP4,PAPSS2,TF,LGALS9,GREM2,ACE2,TGFBR3,C1orf115,EFNA1,SCARB1,PCSK6,LRP4,SERPINB1,CD68,TM4SF1,PCDH1
Coexpression Atlas	gudmap_developingLowerUrinaryTract_P2_bladder stroma (LCM)_500_k3	DevelopingLowerUrinaryTract_P2_bladder stroma (LCM)_emap-30396_k-means-cluster#3_top-relative-expression-ranked_500	Gudmap Mouse MOE430.2	4.12e-08	0.000168	4.75e-07	4.22e-06	13	66	ATP8B1,POF1B,CLIC5,CP,GDA,TMEM45B,ABCC3,CYP3A5,ATP10A,LGALS3,SLC44A1,TSPAN8,SERPINB1
Coexpression Atlas	gudmap_developingLowerUrinaryTract_P1_bladder_J_1000_k5	DevelopingLowerUrinaryTract_P1_bladder_J_emap-30374_k-means-cluster#5_top-relative-expression-ranked_1000	Gudmap Mouse MOE430.2	4.16e-08	0.000169	4.79e-07	4.25e-06	20	161	MGAT4A,FAM3D,POF1B,PLEKHH1,MMP7,CDCP1,ZFP36,GDA,TMEM45B,OCLN,ABCC3,GALNT3,TMBIM1,CEACAM1,COBL,ATP10A,LGALS3,SLC44A1,TSPAN8,TM4SF1
Coexpression	M41656	TRAVAGLINI_LUNG_MUCOUS_CELL	C8: Cell Type Signature	4.18e-08	0.000402	1.94e-06	1.89e-05	16	125	SERPINF1,MMP7,CCL20,ANPEP,UBD,ERO1A,CP,C15orf48,MUC4,TNFSF10,CFB,SRD5A3,SLC26A2,GPX3,TFF3,TSPAN8
Coexpression	M40998	HOWARD_DENDRITIC_CELL_INACT_MONOV_INFLUENZA_A_INDONESIA_05_2005_H5N1_AGE_18_49YO_1DY_UP	C7:VAX: HIPC Vaccine Response	4.2e-08	0.000404	1.94e-06	1.89e-05	18	159	ENPP2,PFKP,PLAC8,PLEKHH1,AK4,CDCP1,ATF3,MUC1,TNFSF10,MYO7B,IRF1,GBP3,IRF7,ISG20,CFB,OAS3,CD7,STOM
Coexpression Atlas	gudmap_kidney_e10.5_UretericTrunk_HoxB7_1000	kidney_e10.5_UretericTrunk_HoxB7_top-relative-expression-ranked_1000	Gudmap Mouse MOE430.2	4.43e-08	0.00018	5.08e-07	4.52e-06	52	802	ERBB3,HLA-DMB,LDOC1,PLAC8,TFCP2L1,CAMK2N1,HOXD1,HOOK1,SCD,PCDH19,CGN,AK4,RBM47,PLS1,ANPEP,SGPP2,CXCL14,CLDN7,HAPLN1,RHPN2,TMEM37,NT5C2,OCLN,MUC1,PRDM16,ACSL5,PRSS8,GALNT3,MYO6,RAPGEF5,KIF12,STEAP2,PTPN3,PTPRJ,NPNT,DPP4,RAB25,KCNE3,CECR2,GPX3,LAMC2,GLB1L2,MAP7,TFRC,SLC44A1,RNASE4,PAK1,TMPRSS2,PRR15,EPCAM,PADI2,CDH16
GO: Molecular Function	GO:0008289	lipid binding		4.45e-08	6.56e-05	7.29e-06	5.74e-05	63	1016	CEACAM5,CEACAM7,ATP8B1,F2,HNF4A,F3,FABP1,HAVCR1,AP2A2,AFP,NPC1L1,OSBPL9,SMPD3,ALDOB,GLTPD2,BAIAP2L2,ALOX15B,VIL1,ANXA4,KIF16B,PAQR8,APOA1,APOA2,APOA4,APOB,PPARA,ZFYVE28,LSR,SLC9A3,CADPS,CIDEC,MTTP,ATP1A1,SDCBP2,MCTP2,DGAT1,CIDEB,IQGAP2,CYP3A5,ARHGAP26,INSIG1,PAQR5,CEACAM6,PTAFR,CEACAM1,ITPR3,APOM,CHPT1,VILL,FZD5,LCN15,DMBT1,DPEP1,ADAP1,RBP4,NR1H3,ATP13A2,SYT7,RASA4,SCARB1,ZFYVE19,RORA,SERPINA5
Coexpression Atlas	GSM605856_500	Myeloid Cells, MF.Thio5.II+480int.PC, CD115+ MHC II+ F480lo SiglecF- CD11c+, Peritoneal Cavity, avg-3	Immgen.org, GSE15907	4.46e-08	0.000182	5.09e-07	4.52e-06	35	433	HLA-DMA,SLCO2B1,ENPP1,SQOR,S100A6,FCGRT,PLAUR,FBXO32,RBM47,SELENOP,TMEM176B,ANPEP,ANXA4,AOAH,GDA,RAB11FIP5,ATF3,CTSS,ABCC3,NAAA,CYP27A1,GATM,PTAFR,TMBIM1,CEACAM1,GGH,BMP2,TCN2,CXCL16,TF,LGALS3,P2RX4,GUSB,CD68,STOM
Coexpression Atlas	Arv_EB-LF_1000_K4	AravindRamakr_EmbryoidBody-LF_top-relative-expression-ranked_1000_k-means-cluster#4	PCBC	4.46e-08	0.000182	5.09e-07	4.52e-06	35	433	CDX2,F2,TTR,TMEM132C,HAVCR1,SERPINA1,HOXC6,AFP,PCDH19,FGB,VTN,CXCL14,APOA1,APOA2,APOA4,APOB,HAPLN1,IGF2,FRZB,CDHR2,ELOVL2,LCN15,EPS8L3,SLC39A5,GNRH2,NPNT,NDNF,RBP4,USH1C,TF,GREM2,ORM1,TM4SF4,RSPO1,CDH17
Coexpression Atlas	gudmap_developingLowerUrinaryTract_P2_bladder urothelium (LCM)_1000_k2	DevelopingLowerUrinaryTract_P2_bladder urothelium (LCM)_emap-30380_k-means-cluster#2_top-relative-expression-ranked_1000	Gudmap Mouse MOE430.2	4.57e-08	0.000186	5.19e-07	4.62e-06	26	262	GCNT3,ENPP1,TLCD4,MGAT4A,ATP8B1,ME1,NDRG1,DEGS2,RBM47,FA2H,ANXA4,RAB11FIP5,SDCBP2,ERAP1,PAQR5,GCNT1,SEMA3B,DIAPH1,GLB1L2,TF,ACE2,SLC35A3,LACTB2,INF2,ENTPD5,TMPRSS2
Coexpression	M2764	ESC_J1_UP_EARLY.V1_UP	C6: Oncogenic Signature	4.62e-08	0.000445	2.13e-06	2.07e-05	19	178	CYP2S1,TTR,NDRG1,SCNN1A,FXYD3,CORO2A,SEMA4G,PLPP3,CIDEB,PRSS8,NAAA,NAGA,NAGS,P4HA2,NR1H3,TFF3,P2RX4,P4HA1,CD68
Coexpression Atlas	Facebase_ST1_e9.5_OticVesic_250	e9.5_OticVesic_top-relative-expression-ranked_250	FaceBase_ST1	4.69e-08	0.000191	5.32e-07	4.73e-06	22	194	TSPAN15,ENPP2,MGLL,MTUS1,HPN,FXYD3,LMNTD2,CLDN3,CLDN7,LSR,PRSS8,GALNT3,INSIG1,GJB1,MARVELD3,RAB25,SRD5A3,GPX2,LLGL2,CDA,PRR15,EPCAM
Coexpression	MM989	MCBRYAN_PUBERTAL_BREAST_5_6WK_UP	M2:CGP: Chemical and Genetic Perturbations	4.82e-08	0.000464	2.21e-06	2.15e-05	17	143	ERBB3,CEACAM5,TLCD4,CEACAM7,NDRG1,FXYD3,ANPEP,CLDN7,TMEM45B,OCLN,ATP1B1,TJP3,CEACAM6,CEACAM1,KLF5,SFXN1,PAM
Coexpression Atlas	PCBC_EB_500	Progenitor-Cell-Biology-Consortium_EmbryoidBody_top-relative-expression-ranked_500	PCBC	4.85e-08	0.000198	5.49e-07	4.88e-06	38	496	CDX2,TMEM176A,F2,TTR,FABP1,TMEM132C,SERPINA1,HOXC6,AFP,AGT,FGB,PLG,VTN,TMEM176B,CXCL14,APOA1,APOA2,POU4F1,APOB,IGF2,FRZB,MTTP,URAD,GDNF,ITIH2,NELL2,LCN15,GNRH2,NPNT,NDNF,RBP4,USH1C,TF,GREM2,ORM1,TM4SF4,RSPO1,CDH17
Coexpression Atlas	BM Top 100 - liver	BM Top 100 - liver	Body Map	5.11e-08	0.000208	5.76e-07	5.12e-06	14	79	TTR,FABP1,SERPINA1,FGB,PLG,ALDOB,VTN,CP,APOA1,MTTP,CYP3A5,CFB,RBP4,ORM1
Coexpression	M10508	HARRIS_HYPOXIA	C2:CGP: Chemical and Genetic Perturbations	5.12e-08	0.000493	2.33e-06	2.28e-05	13	81	HK2,PFKP,F3,PLAUR,VEGFA,CP,BHLHE40,IGF2,CA12,TF,TFF3,TFRC,P4HA1
Coexpression Atlas	Arv_SC-hpx_blastocyst_500_K2	AravindRamakr_StemCell-hypoxiaGrown_fromBlastocyst-derived-humanEmbryonicStemCells_top-relative-expression-ranked_500_k-means-cluster#2	PCBC	5.13e-08	0.000209	5.77e-07	5.13e-06	20	163	AOC1,CEACAM7,FABP1,MEP1A,SERPINA1,ALDOB,ALPI,APOA4,MUC13,MYO1A,CDHR5,DMBT1,PHGR1,SLC39A5,SLC26A3,TRIM31,LGALS4,TFF3,TSPAN8,CDH17
Coexpression Atlas	GSM538266_500	Myeloid Cells, DC.8-4-11b+.Sp, CD11b CD11c CD45 CD8a CD4, Spleen, avg-2	Immgen.org, GSE15907	5.19e-08	0.000211	5.82e-07	5.18e-06	32	376	HLA-DMA,TMEM176A,KLF4,CKB,PIK3CB,CCL5,RBM47,TMEM176B,ANPEP,FLVCR1,BHLHE40,ZFP36,ATF3,CTSS,IL6R,NAAA,CYP27A1,GATM,PTPN3,PTPRJ,TMEM150B,DPP4,ADAP1,GPR35,CXCL16,TFRC,CD7,RASA4,PAK1,CD68,NOSTRIN,STOM
Coexpression Atlas	gudmap_developingLowerUrinaryTract_P2_bladder stroma (LCM)_1000_k2	DevelopingLowerUrinaryTract_P2_bladder stroma (LCM)_emap-30396_k-means-cluster#2_top-relative-expression-ranked_1000	Gudmap Mouse MOE430.2	5.31e-08	0.000216	5.94e-07	5.28e-06	19	148	HEXB,SLCO2B1,ACVRL1,KLF4,CLIC5,CP,TXNIP,GDA,CYP3A5,CYP27A1,ITGB2,SULT1A1,PTPN18,ATP10A,SLC44A1,P2RX4,TSPAN8,SERPINB1,TM4SF1
Coexpression Atlas	gudmap_developingLowerUrinaryTract_e15.5_ureteral tissue_100	DevelopingLowerUrinaryTract_e15.5_ureteral tissue_emap-8234_top-relative-expression-ranked_100	Gudmap Mouse MOE430.2	6.03e-08	0.000246	6.73e-07	5.98e-06	14	80	FOXA3,TTR,FABP1,SERPINA1,AFP,FGB,ALDOB,VTN,APOA1,ITIH2,APOM,CA2,RBP4,TF
Coexpression	M4600	GSE24634_TREG_VS_TCONV_POST_DAY3_IL4_CONVERSION_DN	C7:IMMUNESIGDB: ImmuneSigDB	6.15e-08	0.000592	2.75e-06	2.68e-05	20	200	HEXB,AOC1,HLA-DMA,HLA-DMB,TMEM176A,MGLL,ALOX15B,TMEM176B,PLPP3,ABCC3,NAGA,ITGB2,CALML4,NR1H3,LGALS3,SLC22A18,P2RX4,CDA,HSD17B11,STOM
Coexpression	M6200	GSE2405_HEAT_KILLED_LYSATE_VS_LIVE_A_PHAGOCYTOPHILUM_STIM_NEUTROPHIL_24H_UP	C7:IMMUNESIGDB: ImmuneSigDB	6.15e-08	0.000592	2.75e-06	2.68e-05	20	200	HEXB,TMEM176A,S100A6,PRR13,CCL5,ANXA4,TMC4,SLC6A8,MISP,SLCO2A1,CTNNA1,LAMC2,PAPSS2,TSPAN3,LGALS3,SLC44A1,P2RX4,INF2,SERPINB1,CD68
Coexpression	M3996	JIANG_HYPOXIA_NORMAL	C2:CGP: Chemical and Genetic Perturbations	6.15e-08	0.000592	2.75e-06	2.68e-05	20	200	CKB,NDRG1,SCD,AK4,PLOD2,ANXA4,AGPAT2,ZFP36,IFNGR1,LSR,CIDEB,ITGB4,CHPT1,CA12,DPP4,STBD1,NOL3,P4HA1,ARHGEF2,STOM
Coexpression	M5600	GSE39820_CTRL_VS_IL1B_IL6_CD4_TCELL_DN	C7:IMMUNESIGDB: ImmuneSigDB	6.15e-08	0.000592	2.75e-06	2.68e-05	20	200	HLA-DMB,SERPINF1,PLAC8,S100A6,MMP7,ZFP36,ZFYVE28,SLC17A9,C15orf48,SDCBP2,MCTP2,MXI1,RAPGEF5,PTPRJ,EGLN3,ARRDC4,KLC4,ARHGAP12,TM4SF1,CDH17
Coexpression Atlas	Facebase_RNAseq_e8.5_Non-Floor Plate Neural Epithelium_1000	FacebaseRNAseq_e8.5_Non-Floor Plate Neural Epithelium_top-relative-expression-ranked_1000	FaceBase_RNAseq	6.29e-08	0.000256	7e-07	6.22e-06	59	976	HK2,HLA-DMA,CYP2S1,KLF4,ME1,HOOK1,FCGRT,PRELID2,CGN,AK4,PLS1,TMEM176B,MOGAT2,ERO1A,ANXA4,CAMSAP3,XK,CPT1A,LSR,AATK,RHPN2,SLCO2A1,RAB11FIP5,FXYD2,CTSS,CXADR,TTC39B,GDPD2,SPOCK2,PBLD,SLC46A1,GCNT1,ACSS2,ELOVL2,IGSF10,NELL2,MTMR11,PTPRJ,FZD5,KLF5,TMEM163,NPNT,CA12,WSCD1,TCF7L2,CECR2,MAP7,PAPSS2,SH3D21,LGALS4,TFRC,LGALS9,GREM2,SLC22A18,ABLIM1,RNASE4,SLC16A3,LMO7,RASA4
Coexpression Atlas	gudmap_RNAseq_e15.5_Endothelial_2500_K4	gudmap_RNAseq_e15.5_Endothelial_2500_K4	Gudmap RNAseq	6.63e-08	0.00027	7.35e-07	6.53e-06	27	285	TSPAN15,TMEM176A,ACVRL1,CKB,CAMK2N1,NDRG1,FCGRT,SELENOP,ZFP36,IFNGR1,TXNIP,AATK,SLCO2A1,TMEM37,IL2RG,ERAP1,IRF1,TACC1,CALML4,MVP,TCN2,LGALS9,EVA1B,P2RX4,CD151,TM4SF1,PCDH1
Coexpression	MM1006	BROWN_MYELOID_CELL_DEVELOPMENT_UP	M2:CGP: Chemical and Genetic Perturbations	6.68e-08	0.000643	2.98e-06	2.9e-05	20	201	HEXB,CEACAM5,CEACAM7,S100A6,PIK3CB,PLAUR,PLG,ANPEP,ANXA4,AOAH,MAPK3,CTSS,CEACAM6,ITGB2,CEACAM1,NQO1,RNASE4,CD68,MXD1,STOM
Coexpression	M7633	GSE21360_SECONDARY_VS_QUATERNARY_MEMORY_CD8_TCELL_DN	C7:IMMUNESIGDB: ImmuneSigDB	6.79e-08	0.000653	3.01e-06	2.93e-05	18	164	HK2,TMEM176A,LRG1,NDRG1,HOOK1,PRELID2,VEGFA,TMEM176B,ERO1A,TNFSF9,GGT1,EGLN3,ARRDC4,SFXN1,ACE2,SLC16A3,P4HA1,SLC39A14
Coexpression Atlas	gudmap_dev gonad_e12.5_M_SertoliCell_Sox9_500	dev gonad_e12.5_M_SertoliCell_Sox9_top-relative-expression-ranked_500	Gudmap Mouse ST 1.0	7.01e-08	0.000285	7.75e-07	6.89e-06	35	441	TSPAN15,ERBB3,HK2,ENPP1,ME1,ADORA1,CLCN2,SCD,CGN,PLOD2,USP53,ERO1A,DHRS11,VSIG10,SLC6A8,CADPS,ATP1A1,MASP1,NAAA,IQGAP2,GATM,ACSS2,GDNF,CDC42SE2,TACC1,RCAN1,PAPSS2,GREM2,P2RX4,KIAA1217,PCSK6,ENTPD5,LRP4,PADI2,SLC6A14
Coexpression Atlas	gudmap_developingKidney_e15.5_Medullary collecting duct_200_k5	DevelopingKidney_e15.5_Medullary collecting duct_emap-28063_k-means-cluster#5_top-relative-expression-ranked_200	Gudmap Mouse MOE430.2	7.19e-08	0.000293	7.93e-07	7.05e-06	13	69	ATP8B1,POF1B,UGT8,FXYD3,RNF186,RHPN2,MUC1,RAB17,GLB1L2,LGALS3,TSPAN8,TMPRSS2,CDH16
Coexpression	M40018	BUSSLINGER_GASTRIC_G_CELLS	C8: Cell Type Signature	7.21e-08	0.000694	3.17e-06	3.09e-05	14	98	CAMK2N1,QPCT,FXYD3,TMEM176B,CADPS,SORL1,RAB3B,C12orf75,SYT7,TFF3,MLXIPL,TM4SF4,LRP4,PAM
Coexpression	M2001	WU_CELL_MIGRATION	C2:CGP: Chemical and Genetic Perturbations	7.22e-08	0.000694	3.17e-06	3.09e-05	19	183	SQOR,TUBA4A,PLAC8,S100A6,MTUS1,SCNN1A,FXYD3,CLDN7,TXNIP,CXADR,GALNT3,ITGB4,KLF5,SLC27A2,RAB25,LGALS3,CDA,TM4SF1,EPCAM
Coexpression Atlas	gudmap_kidney_e10.5_UretericTrunk_HoxB7_200	kidney_e10.5_UretericTrunk_HoxB7_top-relative-expression-ranked_200	Gudmap Mouse MOE430.2	7.36e-08	0.0003	8.1e-07	7.2e-06	19	151	HLA-DMB,PLAC8,TFCP2L1,SCD,PCDH19,AK4,ANPEP,SGPP2,CLDN7,HAPLN1,OCLN,GALNT3,PTPN3,NPNT,DPP4,KCNE3,CECR2,EPCAM,CDH16
Coexpression	MM3790	TABULA_MURIS_SENIS_MAMMARY_GLAND_STROMAL_CELL_AGEING	M8: Cell Type Signature	7.56e-08	0.000727	3.31e-06	3.22e-05	27	349	HINT1,SERPINF1,KLF4,S100A6,CAMK2N1,FCGRT,SMPD3,SELENOP,ANPEP,CXCL14,ZFP36,IFNGR1,TXNIP,ATF3,MAPK3,SOD3,SRI,IRF1,CFB,DPEP1,DPYSL2,GPX3,TSPAN3,TGFBR3,ABLIM1,RNASE4,PAM
Coexpression Atlas	GSM605883_500	Myeloid Cells, Mo.6C-II-.Bl, CD115+ B220- CD43- Ly6C- MHCII-, Blood, avg-3	Immgen.org, GSE15907	7.57e-08	0.000308	8.3e-07	7.38e-06	33	402	KLF4,SQOR,PLAC8,MTUS1,FCGRT,SCNN1A,PLAUR,RBM47,IFNGR1,GDA,PRKCD,ATF3,CTSS,IL6R,NAAA,CYP27A1,NAGA,APOBR,CEACAM1,PTPRJ,DIAPH2,TCF7L2,ADAP1,RCAN1,GPR35,TF,LGALS3,TGFBR3,SLC16A3,SCARB1,CD68,HSD17B11,STOM
Coexpression Atlas	gudmap_developingKidney_e11.5_ureteric bud_1000_k5	DevelopingKidney_e11.5_ureteric bud_emap-3844_k-means-cluster#5_top-relative-expression-ranked_1000	Gudmap Mouse MOE430.2	7.92e-08	0.000322	8.66e-07	7.7e-06	28	306	CNKSR1,ERBB3,HLA-DMB,PLCXD1,TLCD4,WIPF3,CARD10,MGLL,LDOC1,HOXD1,AK4,KIAA1522,CAMSAP3,CLDN3,CDCP1,HAPLN1,LSR,BRI3BP,PRDM16,GCHFR,RNF43,PTPN3,MARVELD3,WSCD1,RAB25,LAMC2,PAK1,PADI2
Coexpression	M41655	TRAVAGLINI_LUNG_GOBLET_CELL	C8: Cell Type Signature	8.03e-08	0.000773	3.5e-06	3.41e-05	17	148	GOLM1,KLF4,FAM3D,TMPRSS4,CP,C15orf48,FUT2,MUC4,SORL1,TNFSF10,SRD5A3,SLC26A2,LGALS3,LGALS9,TSPAN8,PAM,SLC6A14
Coexpression Atlas	gudmap_developingLowerUrinaryTract_P1_bladder_500_B	DevelopingLowerUrinaryTract_P1_bladder_B_emap-30374_top-relative-expression-ranked_500	Gudmap Mouse MOE430.2	8.46e-08	0.000344	9.23e-07	8.2e-06	32	384	GCNT3,ENPP1,MGLL,ATP8B1,PFKP,KLF4,ME1,SQOR,TTR,POF1B,S100A6,NDRG1,QPCT,PLCB4,DEGS2,FXYD3,TXNIP,GDA,TMEM45B,PCP4L1,ABCC3,PAQR5,TACC1,CPEB2,DPEP1,RBP4,TPPP,TF,LGALS3,SUSD2,TSPAN8,TMPRSS2
Coexpression	M2631	FARMER_BREAST_CANCER_APOCRINE_VS_BASAL	C2:CGP: Chemical and Genetic Perturbations	8.65e-08	0.000832	3.75e-06	3.65e-05	26	329	HGD,S100A6,MTUS1,SCD,SCNN1A,AK4,RBM47,SELENOP,PRR15L,ABCC6,NT5C2,NAAA,TMEM135,RETSAT,GGT1,KLF5,SLC26A3,TCF7L2,PAPSS2,TSPAN3,ACE2,SLC22A18,SLC35A3,P4HA1,TMPRSS2,PAM
Coexpression Atlas	PCBC_SC_fibroblast_1000	Progenitor-Cell-Biology-Consortium_StemCell_from_inducedPluripotentialStemCells_derived from_from_fibroblast_top-relative-expression-ranked_1000	PCBC	8.94e-08	0.000364	9.73e-07	8.65e-06	59	986	SYN3,RIMKLA,WIPF3,B3GALT5,CYP2S1,ZBED10P,FOXA3,AFP,HPN,CGN,SCNN1A,UGT8,RBM47,CXCL5,LRRC75A,ALPG,VIL1,VIPR2,EPB41L4B,FA2H,TMEM253,CLDN3,CLDN7,LSR,C1orf226,RASEF,IGSF1,OCLN,MUC3A,CXADR,TJP3,CYP2B6,PRSS8,PAQR5,FAM83E,GDPD2,TNFRSF11A,STEAP2,NELL2,TMEM92,FZD5,COBL,MARVELD3,B4GALNT3,SLC27A2,INHBE,RAB25,RAB17,CECR2,SLC19A3,B3GNT7,MAP7,SLC44A4,USH1C,NSUN7,ORM1,MLXIPL,TMPRSS2,EPCAM
Coexpression	M1430	BROWN_MYELOID_CELL_DEVELOPMENT_UP	C2:CGP: Chemical and Genetic Perturbations	8.97e-08	0.000863	3.86e-06	3.77e-05	18	167	HEXB,CEACAM7,S100A6,PIK3CB,PLAUR,PLG,ANPEP,ANXA4,AOAH,MAPK3,CTSS,ITGB2,CEACAM1,NQO1,RNASE4,CD68,MXD1,STOM
Coexpression	M39168	MURARO_PANCREAS_ALPHA_CELL	C8: Cell Type Signature	9e-08	0.000865	3.86e-06	3.77e-05	36	568	EPHX2,ENPP1,ENPP2,TLCD4,TMEM176A,TTR,CKB,AGT,QPCT,TMEM164,FXYD3,FLNB,TMEM176B,SH3KBP1,MUC13,GDA,CADPS,PNMA2,STX16,IL6R,KIF12,BCKDHB,GCNT1,RAB3B,NPNT,DPP4,P4HA2,ARRDC4,C12orf75,GPX3,USH1C,PAPSS2,ABLIM1,RNASE4,TM4SF4,PAM
Coexpression Atlas	Facebase_RNAseq_e9.5_Facial Mesenchyne_2500_K1	FacebaseRNAseq_e9.5_Facial Mesenchyne_top-relative-expression-ranked_2500_k-means-cluster#1	FaceBase_RNAseq	9.02e-08	0.000367	9.79e-07	8.7e-06	38	508	ENPP1,MGLL,CYP2S1,HAVCR1,FCGRT,SH3RF2,RBM47,CXCL5,ALOX15B,ANXA4,CXCL14,SLC1A1,LPIN3,ZFYVE28,SLCO2A1,PCP4L1,MUC4,CTSS,MASP1,NAAA,ARHGAP26,NAGA,ISG20,APOBR,GGH,IGSF10,BMP8B,MTMR11,CHPT1,PTPRJ,VILL,CALML4,ATP13A2,LGALS4,LGALS9,C1orf115,EFNA1,RASA4
GO: Molecular Function	GO:0015291	secondary active transmembrane transporter activity		9.33e-08	0.000138	1.38e-05	0.000108	28	295	SLCO2B1,FABP1,SLC39A4,SLC1A1,SLC6A8,SLC9A3,SLC15A1,SLC17A9,SLCO2A1,SLC22A5,SLC45A1,SLC36A1,SLC46A1,SLC36A2,SLC39A5,SLC38A3,SLC26A3,SLC11A2,SLC26A2,SLC17A4,SLC25A22,SLC22A18,SLC35A3,SLC16A4,SLC16A3,SLC39A14,SLC6A14,CDH17
Coexpression Atlas	Facebase_RNAseq_e10.5_Olfactory Pit_2500_K5	FacebaseRNAseq_e10.5_Olfactory Pit_top-relative-expression-ranked_2500_k-means-cluster#5	FaceBase_RNAseq	9.55e-08	0.000389	1.03e-06	9.19e-06	33	406	ERBB3,MGAT4A,F3,NDRG1,PRR13,CGN,FXYD3,PLS1,LRRC75A,SGPP2,PRR15L,CLDN3,CLDN7,CDCP1,RHPN2,CCDC68,RASEF,ACSL5,TTC39B,PRSS8,SPOCK2,BMP2,KLF5,SLC27A2,NPNT,RAB25,PAPSS2,GREM2,SLC44A1,LLGL2,LMO7,PCSK6,EPCAM
Coexpression Atlas	Facebase_RNAseq_e10.5_Neural Epithelium Overlying Lateral Eminence_2500_K1	FacebaseRNAseq_e10.5_Neural Epithelium Overlying Lateral Eminence_top-relative-expression-ranked_2500_k-means-cluster#1	FaceBase_RNAseq	9.76e-08	0.000397	1.05e-06	9.36e-06	35	447	ENPP1,MGLL,CYP2S1,RBM47,CXCL5,ALOX15B,VIPR1,ANXA4,PRR15L,SLC1A1,LPIN3,ZFYVE28,SLCO2A1,PCP4L1,FXYD2,MUC4,CTSS,MASP1,NAAA,MYO1D,ARHGAP26,ISG20,APOBR,GGH,BMP8B,MTMR11,PTPRJ,VILL,LGALS4,LGALS9,GREM2,C1orf115,SLC44A1,EFNA1,RASA4
Coexpression Atlas	gudmap_developingLowerUrinaryTract_P1_ureter_500_k2	DevelopingLowerUrinaryTract_P1_ureter_emap-30363_k-means-cluster#2_top-relative-expression-ranked_500	Gudmap Mouse MOE430.2	9.83e-08	0.0004	1.06e-06	9.41e-06	15	96	MGAT4A,ATP8B1,F3,TTR,POF1B,RBM47,CP,TMEM45B,ATF3,ABCC3,LGALS3,SLC44A1,TSPAN8,TMPRSS2,TM4SF1
Coexpression	M4371	MARTINEZ_TP53_TARGETS_UP	C2:CGP: Chemical and Genetic Perturbations	1.01e-07	0.000975	4.34e-06	4.23e-05	38	622	SERPINF1,ME1,LRG1,FABP1,NDRG1,SCD,PRR13,QPCT,CCL20,SH3KBP1,CXCL14,CP,APOA4,TXNIP,MISP,IGF2,CIDEC,SLC22A5,ATF3,FUT2,SDCBP2,IL2RG,SOD3,CEACAM1,CHPT1,SLC11A2,ARRDC4,LAMA2,TF,TSPAN3,TFRC,LGALS9,TGFBR3,SLC35A3,PCSK6,SERPINB1,PC,STOM
Coexpression Atlas	Facebase_ST1_e10.5_Nasal_Pit_500_2	e10.5_Nasal_Pit_top-relative-expression-ranked_500_2	FaceBase_ST1	1.02e-07	0.000416	1.1e-06	9.75e-06	21	186	TSPAN15,ENPP2,MGLL,MTUS1,HPN,FXYD3,LMNTD2,CLDN3,CLDN7,LSR,PRSS8,GALNT3,INSIG1,GJB1,MARVELD3,RAB25,SRD5A3,GPX2,CDA,PRR15,EPCAM
GO: Biological Process	GO:0051180	vitamin transport		1.03e-07	0.000691	1.44e-05	0.000135	12	59	AFP,NPC1L1,ABCG2,APOA1,SLC46A1,AMN,TCN1,TCN2,RBP4,SLC19A3,SLC44A4,SCARB1
Coexpression	M13449	CAIRO_HEPATOBLASTOMA_DN	C2:CGP: Chemical and Genetic Perturbations	1.03e-07	0.000987	4.37e-06	4.26e-05	23	267	HGD,MGLL,PLG,ALDOB,VIPR1,ANG,AGPAT2,CXCL14,SLC1A1,SLC3A1,ASL,SORL1,CIDEB,CYP2B6,CYP3A5,INSIG1,NR1I2,CA2,SLC27A2,PAPSS2,GREM2,TMPRSS2,CDA
Coexpression Atlas	Arv_EB-LF_500_K2	AravindRamakr_EmbryoidBody-LF_top-relative-expression-ranked_500_k-means-cluster#2	PCBC	1.05e-07	0.000427	1.12e-06	9.99e-06	25	255	CDX2,TTR,TMEM132C,HAVCR1,SERPINA1,HOXC6,AFP,FGB,VTN,CXCL14,APOA1,APOA2,APOA4,APOB,HAPLN1,IGF2,FRZB,LCN15,GNRH2,NPNT,RBP4,TF,ORM1,TM4SF4,CDH17
Coexpression Atlas	gudmap_developingLowerUrinaryTract_P1_bladder_500_J	DevelopingLowerUrinaryTract_P1_bladder_J_emap-30374_top-relative-expression-ranked_500	Gudmap Mouse MOE430.2	1.07e-07	0.000437	1.15e-06	1.02e-05	32	388	GCNT3,ENPP1,TLCD4,MGAT4A,ATP8B1,PFKP,SQOR,TTR,POF1B,S100A6,QPCT,PLCB4,DEGS2,FXYD3,RBM47,ANXA4,XK,GDA,TMEM45B,ABCC3,PAQR5,CEACAM1,CPEB2,DPEP1,EGLN3,RBP4,TPPP,TF,LGALS3,SUSD2,TSPAN8,TMPRSS2
Coexpression	M3102	SMID_BREAST_CANCER_ERBB2_UP	C2:CGP: Chemical and Genetic Perturbations	1.08e-07	0.00104	4.57e-06	4.45e-05	17	151	SCD,SCNN1A,FGB,ABCC2,FA2H,ABCC6,MUC1,ABCC3,CEACAM6,GGT1,NQO1,NOL3,SLC44A4,PAPSS2,ACE2,TSPAN8,TMPRSS2
Coexpression	M9898	BENPORATH_SUZ12_TARGETS	C2:CGP: Chemical and Genetic Perturbations	1.08e-07	0.00104	4.57e-06	4.45e-05	53	1035	CDX2,RIMKLA,MGLL,KLF4,SQOR,TUBA4A,DSCAML1,HOXC6,CAMK2N1,NDRG1,SEMA6D,HOXD1,HPCAL1,TMEM164,DUOXA2,FOXD2,VIPR2,SGPP2,DUOX2,CXCL14,POU4F1,ABCC6,ZFYVE28,GDA,SLC9A3,IGF2,SLCO2A1,BRINP2,RASEF,ATF3,PDX1,GATM,PAQR5,SPOCK2,TNFRSF11A,GDNF,NAGS,ITPKA,TMEM163,SLC27A2,NPNT,ESPN,NDNF,AMN,NTRK1,RBP4,CXCL16,GRIK3,LGALS3,C1orf115,EFNA1,RSPO1,EPHA10
Coexpression Atlas	gudmap_developingKidney_e15.5_early proxim tubul_500_k2	DevelopingKidney_e15.5_early proxim tubul_emap-28005_k-means-cluster#2_top-relative-expression-ranked_500	Gudmap Mouse MOE430.2	1.08e-07	0.000441	1.15e-06	1.03e-05	10	39	UGT8,CLDN3,CLDN7,PRSS8,NPNT,RAB17,GLB1L2,LGALS3,TMPRSS2,CDH16
Coexpression	M40237	DESCARTES_FETAL_LUNG_SQUAMOUS_EPITHELIAL_CELLS	C8: Cell Type Signature	1.09e-07	0.00105	4.57e-06	4.45e-05	20	207	CEACAM5,GCNT3,CEACAM7,B3GALT5,F3,FAM3D,POF1B,OSGIN1,MUC20,IGF2,C15orf48,FUT2,RNF39,SDCBP2,MUC4,CEACAM6,ATP10B,TTC22,AMN,LGALS3
Coexpression Atlas	Facebase_RNAseq_e9.5_Facial Mesenchyne_1000	FacebaseRNAseq_e9.5_Facial Mesenchyne_top-relative-expression-ranked_1000	FaceBase_RNAseq	1.11e-07	0.000451	1.18e-06	1.05e-05	58	968	HLA-DMA,ENPP1,SERPINF1,CYP2S1,KLF4,ME1,F3,HAVCR1,SIAE,FCGRT,FXYD3,FOXD2,TMEM176B,EPB41L4B,MOGAT2,ANXA4,XK,CLDN3,CLDN7,CPT1A,AATK,SLCO2A1,CCDC68,RAB11FIP5,ATP1B1,FXYD2,PRDM16,CTSS,TTC39B,MYO1D,GATM,SPOCK2,ISG20,ACSS2,IGSF10,NELL2,MTMR11,PTPRJ,KLF5,LPGAT1,TMEM163,CA2,SLC27A2,NPNT,CA12,CECR2,PAPSS2,SH3D21,LGALS4,TFRC,LGALS9,GREM2,RNASE4,EFNA2,LMO7,RASA4,HSD17B11,EPCAM
Coexpression Atlas	PCBC_MESO-5_500	Progenitor-Cell-Biology-Consortium_induced-Mesoderm_top-relative-expression-ranked_500	PCBC	1.11e-07	0.000452	1.18e-06	1.05e-05	37	491	ZBED10P,FOXA3,HNF4A,MYORG,ADORA1,VIL1,CAMSAP3,APOA1,APOA2,CLDN3,FADS6,COL23A1,LSR,SLCO2A1,FRZB,PRSS8,GATM,PAQR5,TNFRSF11A,ELOVL2,BMP2,TMEM92,FZD5,MARVELD3,B4GALNT3,RAB25,RAB17,GRIK3,USH1C,GREM2,ACE2,USP2,MLXIPL,ABCC6P1,LLGL2,TMPRSS2,EPCAM
Transcription Factor Binding Site	V$AREB6_02	V$AREB6_02	TFBS	1.12e-07	0.000113	1.25e-05	9.38e-05	19	200	ERBB3,HNF4A,PLAG1,FLNB,MYO18A,POU4F1,CLDN7,OCLN,GDNF,GJB1,EGLN3,LAMC2,GRIK3,MAP7,USP2,RNASE4,EFNA1,LLGL2,PCDH1
Coexpression Atlas	gudmap_kidney_e10.5_UretericTrunk_HoxB7_k3_500	kidney_e10.5_UretericTrunk_HoxB7_k-means-cluster#3_top-relative-expression-ranked_500	Gudmap Mouse MOE430.2	1.14e-07	0.000465	1.21e-06	1.07e-05	14	84	ERBB3,TFCP2L1,HOOK1,SCD,AK4,ANPEP,TMEM37,MUC1,PRSS8,GALNT3,PTPN3,TFRC,TMPRSS2,CDH16
Coexpression	MM820	MEISSNER_NPC_HCP_WITH_H3_UNMETHYLATED	M2:CGP: Chemical and Genetic Perturbations	1.17e-07	0.00112	4.87e-06	4.75e-05	36	574	CDX1,TFCP2L1,CLDN3,FADS6,CLDN7,CDCP1,SLC1A1,SLC9A3,SHROOM1,FAR2,SLCO2A1,TMEM37,RASEF,ARHGAP27,SLC45A1,ATP2A3,PAQR5,GCNT1,ITGB4,NAGS,BMP8B,MARVELD3,TTC22,RAB3B,AMN,GPX3,LAMC2,CXCL16,SH3D21,LGALS3,PLLP,C1orf115,EVA1B,SLC16A3,TMPRSS2,PRR15
GO: Biological Process	GO:0015721	bile acid and bile salt transport		1.2e-07	0.000806	1.62e-05	0.000152	11	49	CEACAM5,SLCO2B1,CEACAM7,ATP8B1,ABCC2,SLC51A,SLC51B,ABCC3,CEACAM6,CEACAM1,HNF1A
GO: Biological Process	GO:0046394	carboxylic acid biosynthetic process		1.2e-07	0.00081	1.62e-05	0.000152	32	387	CEACAM5,CEACAM7,MGLL,HNF4A,SCD,AGT,OSBPL9,PLOD2,ALOX15B,PRXL2B,FA2H,APOA4,FADS6,TRIB3,ASL,PECR,INSIG1,CYP27A1,ABHD3,GATM,CEACAM6,ACSS2,ELOVL2,NAGS,GGT1,CEACAM1,LPGAT1,SLC27A2,HNF1A,NR1H3,MLXIPL,MALRD1
GO: Molecular Function	GO:0005543	phospholipid binding		1.21e-07	0.000178	1.62e-05	0.000127	41	553	CEACAM5,CEACAM7,ATP8B1,F3,FABP1,HAVCR1,AP2A2,SMPD3,ALDOB,GLTPD2,BAIAP2L2,VIL1,ANXA4,KIF16B,APOA1,APOA2,APOA4,APOB,ZFYVE28,SLC9A3,CADPS,CIDEC,SDCBP2,MCTP2,CIDEB,IQGAP2,ARHGAP26,CEACAM6,PTAFR,CEACAM1,ITPR3,APOM,VILL,DPEP1,ADAP1,ATP13A2,SYT7,RASA4,SCARB1,ZFYVE19,SERPINA5
Coexpression Atlas	facebase_RNAseq_e9.5_OlfPlac_2500	facebase_RNAseq_e9.5_OlfPlac_2500	Gudmap RNAseq	1.24e-07	0.000505	1.31e-06	1.16e-05	84	1631	CNKSR1,ERBB3,ACHE,WIPF3,ATP8B1,LDOC1,POF1B,PLEKHH1,MFNG,HOOK1,SCD,PCDH19,CGN,AK4,PLAUR,FBXO32,RBM47,PLS1,LRRC75A,CAMSAP3,SGPP2,CLDN3,CLDN7,VSIG10,CDCP1,HAPLN1,LSR,RHPN2,TMEM37,CCDC68,RASEF,ARHGAP27,OCLN,MCTP2,CXADR,MXI1,SOD3,SORL1,TJP3,ANO9,PRSS8,GALNT3,SLC46A1,GCHFR,RETSAT,RNF43,ELOVL2,CFB,BMP2,PTPN3,FZD5,KLF5,MARVELD3,SLC27A2,NPNT,ESPN,CPEB2,CA12,WSCD1,EGLN3,RAB25,CECR2,GPX2,GPX3,NR1H3,LAMC2,B3…
GO: Biological Process	GO:0042632	cholesterol homeostasis		1.27e-07	0.000857	1.65e-05	0.000155	17	125	EPHX2,HNF4A,SCD,HPN,NPC1L1,APOA1,APOA2,APOA4,APOB,MTTP,TTC39B,INSIG1,APOM,NR1H3,MALRD1,SCARB1,RORA
Coexpression Atlas	Facebase_RNAseq_e8.5_Paraxial Mesoderm_2500_K2	FacebaseRNAseq_e8.5_Paraxial Mesoderm_top-relative-expression-ranked_2500_k-means-cluster#2	FaceBase_RNAseq	1.27e-07	0.000518	1.34e-06	1.19e-05	28	313	MGAT4A,MTUS1,CGN,PLS1,LRRC75A,VEGFA,CAMSAP3,KIF16B,CLDN7,CDCP1,CLSTN1,TXNIP,CCDC68,TTC39B,PRSS8,MYO1D,SPOCK2,BMP2,KLF5,NPNT,RAB25,MAP7,PAPSS2,GREM2,SLC44A1,LMO7,ENTPD5,EPCAM
GO: Biological Process	GO:0015850	organic hydroxy compound transport		1.28e-07	0.00086	1.65e-05	0.000155	32	388	CEACAM5,SLCO2B1,CEACAM7,ATP8B1,AGT,NPC1L1,OSBPL9,SMPD3,ABCC2,SLC51A,APOA1,APOA2,APOA4,APOB,SLC51B,CADPS,MTTP,TTC39B,ABCC3,CEACAM6,GDNF,CEACAM1,APOM,RAB3B,HNF1A,RBP4,NR1H3,SYT7,LGALS3,SLC44A1,SLC16A3,SCARB1
Coexpression Atlas	GSM854329_500	Myeloid Cells, Mo.6C+II-.BM, B220neg CD3neg CD115+ Ly-6C+, Bone marrow, avg-3	Immgen.org, GSE15907	1.28e-07	0.000521	1.34e-06	1.19e-05	32	391	HK2,HLA-DMA,SQOR,PLAC8,S100A6,NDRG1,MTUS1,PLAUR,TMEM176B,AOAH,GDA,PRKCD,CTSS,NAAA,CYP27A1,GATM,PTAFR,CEACAM1,GGH,KCNE3,ADAP1,TCN2,PAPSS2,TF,LGALS3,SLC16A3,RASA4,SCARB1,SERPINB1,CD68,PADI2,STOM
Coexpression	M39155	GAO_LARGE_INTESTINE_24W_C5_LGR5POS_STEM_CELL	C8: Cell Type Signature	1.34e-07	0.00129	5.56e-06	5.42e-05	11	60	RGMB,PLEKHH1,RNF186,ATP10B,GJB1,SULT1B1,SLC27A2,HNF1A,FOXD2-AS1,GPX2,TSPAN8
Coexpression	M39266	HU_FETAL_RETINA_MICROGLIA	C8: Cell Type Signature	1.34e-07	0.00129	5.57e-06	5.43e-05	28	382	HLA-DMA,HLA-DMB,SLCO2B1,MGAT4A,FCGRT,PRR13,PLAUR,ABCG2,AOAH,SH3KBP1,ZFP36,IFNGR1,TXNIP,PRKCD,ATF3,ARHGAP27,CTSS,IL6R,SORL1,GATM,PTAFR,ITGB2,TACC1,C12orf75,CXCL16,LGALS9,P2RX4,ARHGAP45
Coexpression Atlas	Facebase_RNAseq_e8.5_Floor Plate_500	FacebaseRNAseq_e8.5_Floor Plate_top-relative-expression-ranked_500	FaceBase_RNAseq	1.36e-07	0.000554	1.42e-06	1.27e-05	37	495	GOLM1,ME1,PLEKHH1,HOOK1,AK4,PLCB4,PLS1,LRRC75A,SEMA4B,MOGAT2,CAMSAP3,XK,ZFYVE28,LSR,ATP1B1,MASP1,PRSS8,TMEM135,GATM,GDPD2,ELOVL2,FZD5,KLF5,TMEM163,SLC27A2,CA12,TCF7L2,CECR2,MAP7,LLGL2,SLC16A3,LRRC1,ENTPD5,PAK1,PAM,SLC39A14,CDH4
Coexpression	MM986	MCBRYAN_PUBERTAL_BREAST_3_4WK_UP	M2:CGP: Chemical and Genetic Perturbations	1.38e-07	0.00133	5.7e-06	5.56e-05	21	230	CEACAM5,TLCD4,CEACAM7,SERPINA1,TFCP2L1,SCD,FBXO32,FXYD3,KIAA1522,CXCL14,CLDN3,CDCP1,TMEM45B,ABCC3,CEACAM6,CEACAM1,LGALS3,TSPAN8,TMPRSS2,EPCAM,PADI2
Coexpression Atlas	gudmap_developingKidney_e15.5_early proxim tubul_200_k5	DevelopingKidney_e15.5_early proxim tubul_emap-28005_k-means-cluster#5_top-relative-expression-ranked_200	Gudmap Mouse MOE430.2	1.41e-07	0.000572	1.47e-06	1.3e-05	10	40	HPN,SERPINF2,FXYD2,CIDEB,CDHR2,GGT1,SLC39A5,DPEP1,AMN,SUSD2
Coexpression Atlas	GSM605831_500	Myeloid Cells, DC.8-.Th, CD11b-FITC CD4-PE MHCII-APC CD11c-eFluor780 CD8-eF, Thymus, avg-3	Immgen.org, GSE15907	1.42e-07	0.000579	1.48e-06	1.32e-05	33	413	HK2,HLA-DMA,TMEM176A,ACVRL1,CKB,SEMA6D,FCGRT,PIK3CB,CCL5,RBM47,TMEM176B,ANPEP,ANXA4,LSR,ATF3,CTNNA1,CTSS,NAAA,CYP27A1,NAGA,GATM,IRF7,TMBIM1,SULT1A1,CXCL16,LGALS3,RASA4,GUSB,PAK1,CD68,NOSTRIN,LY75,EPCAM
GO: Biological Process	GO:0055092	sterol homeostasis		1.43e-07	0.000965	1.79e-05	0.000168	17	126	EPHX2,HNF4A,SCD,HPN,NPC1L1,APOA1,APOA2,APOA4,APOB,MTTP,TTC39B,INSIG1,APOM,NR1H3,MALRD1,SCARB1,RORA
GO: Biological Process	GO:0016053	organic acid biosynthetic process		1.44e-07	0.000966	1.79e-05	0.000168	32	390	CEACAM5,CEACAM7,MGLL,HNF4A,SCD,AGT,OSBPL9,PLOD2,ALOX15B,PRXL2B,FA2H,APOA4,FADS6,TRIB3,ASL,PECR,INSIG1,CYP27A1,ABHD3,GATM,CEACAM6,ACSS2,ELOVL2,NAGS,GGT1,CEACAM1,LPGAT1,SLC27A2,HNF1A,NR1H3,MLXIPL,MALRD1
Coexpression Atlas	Facebase_RNAseq_ratio_e10.5_MaxillaryArch_vs_Mandibular_2500_K4	FacebaseRNAseq_ratio_e10.5_MaxillaryArch_vs_Mandibular_top-relative-expression-ranked_2500_k-means-cluster#4	FaceBase_RNAseq	1.44e-07	0.000586	1.49e-06	1.33e-05	29	334	MGAT4A,MTUS1,CGN,PLS1,LRRC75A,VEGFA,TMEM176B,KIAA1522,CAMSAP3,CDCP1,CLSTN1,CCDC68,TTC39B,PRSS8,MYO1D,SPOCK2,BMP2,KLF5,TMEM163,NPNT,RAB25,MAP7,PAPSS2,GREM2,SLC44A1,LMO7,ENTPD5,HSD17B11,EPCAM
GO: Biological Process	GO:0046486	glycerolipid metabolic process		1.49e-07	0.00101	1.83e-05	0.000172	34	431	ENPP2,MGLL,PIK3CB,SCD,ANG,MOGAT2,AGPAT2,APOA1,APOA2,APOA4,APOB,CPT1A,LPIN3,CIDEC,MTTP,MOGAT3,IPMK,DGAT1,ACSL5,SORL1,CIDEB,NAAA,INSIG1,ABHD3,APOBR,ITPKA,CHPT1,LPGAT1,DPEP1,TCF7L2,NR1H3,SLC44A4,SLC44A1,SCARB1
GO: Cellular Component	GO:0005788	endoplasmic reticulum lumen		1.64e-07	0.000102	4.45e-06	3.12e-05	29	336	TSPAN15,PCSK5,ACHE,MGAT4A,GOLM1,F2,MELTF,SERPINA1,AFP,PLAUR,VTN,ERO1A,CP,APOA1,APOA2,APOA4,APOB,COL23A1,MTTP,PRKCSH,MAPK3,ERAP1,ITIH2,SLC27A2,P4HA2,TF,ACE2,P4HA1,ENTPD5
Coexpression	M1533	CUI_TCF21_TARGETS_2_DN	C2:CGP: Chemical and Genetic Perturbations	1.64e-07	0.00158	6.75e-06	6.58e-05	46	850	WIPF3,CARD10,MGLL,ATP8B1,KLF4,CLIC5,MTUS1,SCD,PLOD2,VEGFA,ANXA4,MYO18A,VSIG10,TXNIP,PLPP3,SLCO2A1,ATP2A3,IL2RG,CTSS,PAG1,MYO1D,IQGAP2,MYO6,RAPGEF5,ARHGAP26,TMBIM1,CHPT1,PTPRJ,SEMA3B,DIAPH2,TACC1,CPEB2,DPP4,DPYSL2,RCAN1,ATP10A,TNFRSF11B,TGFBR3,P2RX4,INF2,LMO7,TSPAN8,RORA,PRR15,NOSTRIN,TM4SF1
Coexpression	M7625	GSE21360_PRIMARY_VS_QUATERNARY_MEMORY_CD8_TCELL_UP	C7:IMMUNESIGDB: ImmuneSigDB	1.68e-07	0.00162	6.87e-06	6.7e-05	18	174	MGLL,CCL5,FBXO32,ANPEP,ANXA4,SLC6A8,PRKCD,ATF3,IL2RG,IRF7,PTPRJ,NQO1,SLC11A2,LGALS3,TFRC,P2RX4,RASA4,LY75
Coexpression Atlas	gudmap_kidney_P4_CapMesRenVes_Crym_200	kidney_P4_CapMesRenVes_Crym_top-relative-expression-ranked_200	Gudmap Mouse MOE430.2	1.68e-07	0.000684	1.74e-06	1.55e-05	20	175	HLA-DMB,ENPP2,MGLL,SGPP2,CXCL14,CLDN7,C1QTNF12,MYO6,BMP2,PTPN3,NDNF,DPP4,CECR2,LAMC2,PAPSS2,TSPAN8,LRP4,EPCAM,CDH4,CDH16
Coexpression	M5946	HALLMARK_COAGULATION	H: Hallmark	1.69e-07	0.00163	6.9e-06	6.73e-05	16	138	F2,HNF4A,F3,MEP1A,SERPINA1,HPN,MMP7,PLG,ANG,APOA1,MST1,GDA,CFB,DPP4,TMPRSS6,TF
Coexpression Atlas	BM Top 100 - kidney medulla	BM Top 100 - kidney medulla	Body Map	1.71e-07	0.000695	1.76e-06	1.56e-05	13	74	AOC1,HOXC6,SCNN1A,ALDOB,RBM47,SLC9A3-OT1,SLC3A1,FXYD2,PAQR5,PBLD,CA12,EPCAM,CDH16
Coexpression Atlas	Facebase_ST1_e9.5_OticVesic_500	e9.5_OticVesic_top-relative-expression-ranked_500	FaceBase_ST1	1.71e-07	0.000695	1.76e-06	1.56e-05	32	396	TSPAN15,ENPP2,MGLL,LDOC1,MTUS1,HPN,FXYD3,PLOD2,ERO1A,LMNTD2,CLDN3,CLDN7,LSR,MISP,CCDC68,ATP1A1,PRSS8,GALNT3,INSIG1,GJB1,MARVELD3,WSCD1,RAB25,SLC11A2,SRD5A3,GPX2,USP2,LLGL2,SLC16A3,CDA,PRR15,EPCAM
Coexpression Atlas	GSM605865_500	Myeloid Cells, MF.Thio5.II-480int.PC, CD115+ MHCII- F480int SiglecF- CD11c+, Peritoneal Cavity, avg-3	Immgen.org, GSE15907	1.73e-07	0.000704	1.78e-06	1.58e-05	34	437	SLCO2B1,ENPP1,SQOR,S100A6,FCGRT,PLAUR,FBXO32,RBM47,SELENOP,ANPEP,ANXA4,AOAH,GDA,PLPP3,RAB11FIP5,ATF3,CTSS,ABCC3,NAAA,CYP27A1,GATM,PTAFR,TMBIM1,CEACAM1,GGH,BMP2,TCN2,TF,LGALS3,RNASE4,P2RX4,GUSB,CD68,STOM
Coexpression Atlas	PCBC_DE_1000	Progenitor-Cell-Biology-Consortium_induced-DefinitiveEndoderm_top-relative-expression-ranked_1000	PCBC	1.74e-07	0.000706	1.78e-06	1.58e-05	58	981	B3GALT5,ZBED10P,FOXA3,MYORG,CGN,SCNN1A,QPCT,RBM47,CXCL5,VIL1,VIPR1,VIPR2,FA2H,CAMSAP3,TMEM253,APOA2,CLDN3,FADS6,CLDN7,COL23A1,LSR,RHPN2,SLCO2A1,FRZB,TMEM37,PCP4L1,OCLN,MUC3A,TJP3,CAPN12,TTC39B,PRSS8,GATM,PAQR5,KIF12,FAM83E,TNFRSF11A,ELOVL2,BMP2,TMEM92,FZD5,COBL,MARVELD3,B4GALNT3,RAB25,KCNE3,RAB17,CECR2,TMT1B,B3GNT7,MAP7,NSUN7,GREM2,USP2,EFNA2,TMPRSS2,CDA,EPCAM
Coexpression Atlas	gudmap_kidney_adult_RenMedVasc_Tie2_500	kidney_adult_RenMedVasc_Tie2_top-relative-expression-ranked_500	Gudmap Mouse MOE430.2	1.78e-07	0.000724	1.82e-06	1.62e-05	33	417	MGLL,ACVRL1,SQOR,PLAC8,S100A6,SERPINA1,MFNG,NDRG1,CLIC5,PLAUR,TXNIP,PLPP3,IL2RG,ACSL5,TTC39B,MYO6,TNFSF10,ERAP1,RAPGEF5,IRF7,TMBIM1,CFB,CEACAM1,SULT1A1,CALML4,CA2,EGLN3,TCN2,LGALS9,EFNA1,TSPAN8,TM4SF1,STOM
GO: Biological Process	GO:0040012	regulation of locomotion		1.81e-07	0.00122	2.17e-05	0.000204	75	1399	PCSK5,CEACAM5,ENPP2,SERPINF1,CEACAM7,CARD10,ACVRL1,KLF4,HNF4A,F3,ADORA1,MGAT3,SEMA6D,MTUS1,SH3RF2,PIK3CB,AGT,CCL5,SMPD3,MMP7,CCL20,PLG,ALOX15B,OSGIN1,VEGFA,DUOXA2,VIL1,SEMA4B,VTN,EPB41L4B,CAMSAP3,DUOX2,CXCL14,CLDN3,CLDN7,SEMA4G,MST1,IGF2,PLPP3,CTNNA1,MAPK3,IL6R,SORL1,CEACAM6,SPOCK2,GCNT1,PTAFR,CEACAM1,IGSF10,BMP2,PTPRJ,SEMA3B,DIAPH1,MARVELD3,DPEP1,DPP4,DPYSL2,RAB25,LAMA2,LAMC2,CXCL16,TF,LGALS3,TF…
Coexpression Atlas	gudmap_developingKidney_e15.5_ureter tip_200_flank cortic collct	DevelopingKidney_e15.5_ureter tip_flank cortic collct_emap-27752_top-relative-expression-ranked_200	Gudmap Mouse MOE430.2	1.86e-07	0.000758	1.9e-06	1.69e-05	19	160	GCNT3,CHDH,ADORA1,TFCP2L1,HOXD1,UGT8,SGPP2,CXCL14,CLDN3,CLDN7,OCLN,PRDM16,PTPN3,MARVELD3,WSCD1,GLB1L2,TFRC,TMPRSS2,CDH16
Coexpression	M39018	FAN_EMBRYONIC_CTX_BIG_GROUPS_BRAIN_ENDOTHELIAL	C8: Cell Type Signature	1.87e-07	0.0018	7.59e-06	7.4e-05	27	365	MGLL,ACVRL1,KLF4,QPCT,ABCG2,ANPEP,BHLHE40,SLCO2A1,FRZB,MYO6,RAPGEF5,TACC1,SLC38A3,CA2,DPEP1,TCN2,LAMA2,PAPSS2,RGS3,TFRC,ABLIM1,EFNA1,EVA1B,SCARB1,NOSTRIN,TM4SF1,STOM
Coexpression	MM16613	ZHANG_UTERUS_C7_EPITHELIAL2_CELL	M8: Cell Type Signature	1.9e-07	0.00183	7.69e-06	7.5e-05	44	799	CEACAM5,CEACAM7,TMEM176A,GOLM1,F3,FAM3D,TUBA4A,SERPINA1,PRR13,PLAUR,FXYD3,MUC20,ANPEP,ANXA4,TMPRSS4,SLC39A4,TMC4,CLDN3,CLDN7,LSR,TMEM45B,CTNNA1,ATP1A1,FUT2,MUC1,MUC4,ACSL5,NAAA,CEACAM6,TMBIM1,CFB,CEACAM1,CA2,CA12,TRIM15,RAB25,LAMC2,SLC44A4,SFXN1,TSPAN8,SERPINB1,ELF3,EPCAM,PADI2
Transcription Factor Binding Site	M40825	NR1H4_TARGET_GENES	MSigDB	1.91e-07	0.000192	1.92e-05	0.000144	24	317	SERPINA1,AGT,ANG,MYO18A,SLC51B,C1orf226,BRINP2,PECR,IQGAP2,TMBIM1,CFB,CHPT1,INHBE,TMPRSS6,RBP4,RGS3,RNASE4,EFNA1,CLMN,SH3D19,TM4SF4,ELF3,ARHGEF2,LRRFIP2
Coexpression	M1714	LEIN_OLIGODENDROCYTE_MARKERS	C2:CGP: Chemical and Genetic Perturbations	2.01e-07	0.00194	8.1e-06	7.9e-05	12	76	NDRG1,SCD,UGT8,SELENOP,FA2H,AATK,GATM,GJB1,CA2,WSCD1,SLC44A1,SERPINB1
Coexpression	M41152	FLETCHER_PBMC_BCG_10W_INFANT_BCG_STIMULATED_VS_UNSTIMULATED_10W_DN	C7:VAX: HIPC Vaccine Response	2.02e-07	0.00195	8.1e-06	7.9e-05	22	256	HEXB,ME1,S100A6,FCGRT,VIPR1,ANXA4,CTSS,ABCC3,CYP27A1,TMBIM1,CA2,DPYSL2,KCNE3,GPR35,TMT1B,CXCL16,LGALS3,SLC44A1,EVA1B,SLC16A3,INF2,CD151
Coexpression Atlas	gudmap_kidney_adult_RenMedVasc_Tie2_k1_1000	kidney_adult_RenMedVasc_Tie2_k-means-cluster#1_top-relative-expression-ranked_1000	Gudmap Mouse MOE430.2	2.02e-07	0.000822	2.06e-06	1.83e-05	12	63	TMEM176A,SQOR,SIAE,NDRG1,ABCG2,SELENOP,FXYD2,CFB,CALML4,CA2,TCN2,C1orf115
Coexpression Atlas	gudmap_developingLowerUrinaryTract_adult_bladder_1000_k2	DevelopingLowerUrinaryTract_adult_bladder_emap-29457_k-means-cluster#2_top-relative-expression-ranked_1000	Gudmap Mouse MOE430.2	2.03e-07	0.000824	2.06e-06	1.83e-05	20	177	GCNT3,TLCD4,ATP8B1,ME1,TTR,PLEKHH1,DEGS2,RBM47,FA2H,ANXA4,TMEM45B,RAB11FIP5,PAQR5,ATP10B,ISG20,MARVELD3,TF,LGALS3,ENTPD5,TMPRSS2
Coexpression	M10371	BENPORATH_ES_WITH_H3K27ME3	C2:CGP: Chemical and Genetic Perturbations	2.07e-07	0.00199	8.27e-06	8.06e-05	55	1115	CDX1,CDX2,RIMKLA,CHDH,KLF4,DSCAML1,HOXC6,CAMK2N1,NDRG1,CLIC5,SEMA6D,HOXD1,SMPD3,DUOXA2,FOXD2,SGPP2,DUOX2,CXCL14,POU4F1,ZFYVE28,SLC9A3,SLCO2A1,BRINP2,ATF3,ABCC3,TNFSF9,PDX1,GDNF,ELOVL2,NAGS,ITPKA,SEMA3B,TMEM163,SLC27A2,NPNT,ESPN,WSCD1,AMN,NTRK1,RBP4,CXCL16,GRIK3,GLB1L2,SYT7,LGALS3,RSPO3,CRYL1,MLXIPL,PLLP,C1orf115,EFNA1,PADI2,RSPO1,CDH4,EPHA10
Coexpression	M41666	TRAVAGLINI_LUNG_CAPILLARY_INTERMEDIATE_1_CELL	C8: Cell Type Signature	2.09e-07	0.00201	8.31e-06	8.1e-05	17	158	TSPAN15,ACVRL1,VIPR1,IFNGR1,MYO6,CYP3A5,RAPGEF5,FAXDC2,IRF1,ISG20,CA2,GPX3,PAPSS2,TGFBR3,KIAA1217,SERPINB1,PCDH1
GO: Biological Process	GO:0006811	monoatomic ion transport		2.1e-07	0.00142	2.45e-05	0.00023	78	1482	SLCO2B1,ATP8B1,F2,LRG1,S100A6,ADORA1,HAVCR1,MELTF,CLCN2,CLIC5,HPN,AGT,SCNN1A,CCL5,PLCB4,ABCC2,FXYD3,ERO1A,FLVCR1,CP,SLC39A4,TMC4,SLC1A1,ABCC6,SLC6A8,SLC9A3,SLC15A1,SLCO2A1,SLC22A5,TMEM37,ATP1A1,ATP1B1,FXYD2,ATP2A3,CTSS,ABCC3,ANO9,PRSS8,SLC36A1,SRI,SLC46A1,PTAFR,STEAP2,HEPH,SLC36A2,ITPR3,PTPN3,DIAPH1,TMEM163,SLC39A5,SLC38A3,CA2,SLC26A3,KCNE3,SLC11A2,TCN1,TCN2,NOL3,GPR35,SLC26A2,SLC17A4,GRIK3,ATP13…
Coexpression Atlas	GSM538252_500	Myeloid Cells, DC.8+.MLN, CD11b-FITC CD4-PE CD11c-Alexa750 CD8a-PacificBlue, Lymph Node, avg-3	Immgen.org, GSE15907	2.1e-07	0.000854	2.13e-06	1.89e-05	33	420	HLA-DMA,TMEM176A,CKB,SEMA6D,FCGRT,PIK3CB,CCL5,RBM47,TMEM176B,ANPEP,ANXA4,ATF3,NAAA,CYP27A1,NAGA,GATM,TNFRSF11A,SULT1A1,DPP4,ARRDC4,CXCL16,PAPSS2,TSPAN3,LGALS3,RASA4,GUSB,SCARB1,PAK1,CD68,NOSTRIN,LY75,MXD1,STOM
GO: Biological Process	GO:0003018	vascular process in circulatory system		2.11e-07	0.00142	2.45e-05	0.00023	30	357	CEACAM5,SLCO2B1,CEACAM7,MGLL,ACVRL1,ADORA1,AGT,FGB,HRH2,ABCG2,SMPD3,ABCC2,SERPINF2,VEGFA,SLC1A1,SLC22A5,OCLN,ATP2A3,SOD3,TJP3,ABCC3,CEACAM6,CEACAM1,PTPRJ,SLC38A3,TFRC,ACE2,TGFBR3,SLC44A1,P2RX4
Coexpression	M16651	RODRIGUES_THYROID_CARCINOMA_POORLY_DIFFERENTIATED_DN	C2:CGP: Chemical and Genetic Perturbations	2.11e-07	0.00203	8.36e-06	8.15e-05	44	802	ERBB3,ENPP2,PLEKHH1,TBC1D32,SIAE,SERPINA1,TMEM164,PLG,FLNB,SELENOP,HSD17B7,EPB41L4B,ANXA4,SGPP2,SLC1A1,TXNIP,LSR,PLPP3,ATP1A1,OCLN,MXI1,SORL1,ERAP1,RAPGEF5,SRI,GATM,TNFRSF11A,GCNT1,TMBIM1,FZD5,GPX3,AHCYL2,TGFBR3,CRYL1,ABLIM1,PLLP,EFNA1,LLGL2,CLMN,RASA4,KIAA1217,PAK1,SLC39A14,EPCAM
GO: Cellular Component	GO:0070161	anchoring junction		2.12e-07	0.000133	5.53e-06	3.88e-05	58	987	CNKSR1,CEACAM5,AOC1,CEACAM7,POF1B,NDRG1,HPN,CGN,PLAUR,ABCC2,BAIAP2L2,ALOX15B,VEGFA,USP53,FLNB,EPB41L4B,SH3KBP1,CAMSAP3,DUOX2,CLDN3,CLDN7,VSIG10,LSR,MISP,SHROOM1,PLPP3,PRKCD,CTNNA1,MAPK3,ATP1A1,OCLN,ATP1B1,STX16,CXADR,TJP3,CDHR2,ARHGAP26,CEACAM6,CDHR5,ITGB2,ITGB4,CEACAM1,GJB1,PTPRJ,FZD5,MARVELD3,ESPN,DPP4,TRIM15,LLGL2,LMO7,PAK1,CD151,ARHGEF2,EPCAM,PCDH1,CDH4,CDH17
Coexpression	M4508	ENK_UV_RESPONSE_EPIDERMIS_DN	C2:CGP: Chemical and Genetic Perturbations	2.12e-07	0.00204	8.37e-06	8.16e-05	33	512	EPHX2,HK2,F3,CKB,NDRG1,HOOK1,PIK3CB,PLAUR,CCL20,VEGFA,VIPR1,SELENOP,ANG,CXCL14,PRKCD,ATF3,IL6R,ABCC3,MYO6,GATM,ISG20,NELL2,DIAPH2,RCAN1,LGALS3,TFRC,TGFBR3,SLC22A18,PLLP,GUSB,SCARB1,RORA,MXD1
GO: Biological Process	GO:0042060	wound healing		2.14e-07	0.00144	2.45e-05	0.00023	39	543	ERBB3,CEACAM5,CEACAM7,ACVRL1,F2,HNF4A,F3,LRG1,SERPINA1,PIK3CB,HPN,FGB,PLAUR,PLG,SERPINF2,FER1L5,VEGFA,VIL1,VTN,EPB41L4B,DUOX2,CLDN3,PPARA,PLPP3,PRKCD,OCLN,IL6R,CXADR,CEACAM6,CEACAM1,PTPRJ,NDNF,PAPSS2,SYT7,SCARB1,TSPAN8,PAK1,CD151,ARHGEF2
Coexpression Atlas	GSM854246_500	Myeloid Cells, DC.103+11b-.Salm3.SI, CD45+ MHCII+ Gr1- CD11c-hi CD103+ CD11b-, Small Intestine, avg-5	Immgen.org, GSE15907	2.16e-07	0.000879	2.18e-06	1.94e-05	31	380	HK2,HLA-DMA,PFKP,ACVRL1,KLF4,PLAC8,CKB,QPCT,RBM47,ANPEP,ANXA4,AOAH,BHLHE40,ATF3,CTSS,NAAA,MYO6,CYP27A1,NAGA,GATM,TMBIM1,SULT1A1,ARRDC4,CXCL16,LGALS3,GUSB,PAK1,CD68,NOSTRIN,LY75,EPCAM
Coexpression	M19768	LIN_SILENCED_BY_TUMOR_MICROENVIRONMENT	C2:CGP: Chemical and Genetic Perturbations	2.21e-07	0.00213	8.7e-06	8.48e-05	14	107	ERBB3,GCNT3,CAMK2N1,CLDN7,VSIG10,C15orf48,MYO6,CEACAM6,CEACAM1,TACC1,TRIM2,ELF3,MXD1,SLC6A14
Coexpression	M9210	LINDSTEDT_DENDRITIC_CELL_MATURATION_C	C2:CGP: Chemical and Genetic Perturbations	2.25e-07	0.00217	8.81e-06	8.58e-05	11	63	AOC1,MGLL,ALOX15B,ATF3,CTNNA1,MUC1,TNFRSF11A,TNFRSF11B,TFRC,LGALS9,LY75
Coexpression Atlas	gudmap_developingKidney_e15.5_Medullary collecting duct_500_k5	DevelopingKidney_e15.5_Medullary collecting duct_emap-28063_k-means-cluster#5_top-relative-expression-ranked_500	Gudmap Mouse MOE430.2	2.27e-07	0.000925	2.29e-06	2.04e-05	17	131	ATP8B1,FAM3D,POF1B,DEGS2,FXYD3,RNF186,RHPN2,MUC1,ABCC3,PAQR5,ATP10B,RAB17,GLB1L2,LGALS3,TSPAN8,TMPRSS2,CDH16
Coexpression	MM716	LEIN_OLIGODENDROCYTE_MARKERS	M2:CGP: Chemical and Genetic Perturbations	2.33e-07	0.00225	9.09e-06	8.86e-05	12	77	NDRG1,SCD,UGT8,SELENOP,FA2H,AATK,GATM,GJB1,CA2,WSCD1,SLC44A1,SERPINB1
Coexpression Atlas	JC_hmvEC_1000	JC_hmvEC_top-relative-expression-ranked_1000	PCBC	2.35e-07	0.000957	2.36e-06	2.1e-05	58	990	TSPAN15,MGAT4A,CARD10,GOLM1,ATP8B1,ACVRL1,LRG1,S100A6,MFNG,HOXD1,MTUS1,CCL5,PLAUR,CCL20,CXCL5,PLOD2,ANPEP,UBD,ERO1A,CDCP1,SLCO2A1,PNMA2,C15orf48,CCDC68,RAB11FIP5,SDCBP2,IL2RG,CTSS,ACSL5,ABCC3,TNFSF10,MYO7B,GBP3,IRF7,ISG20,TNFRSF11A,STEAP2,ITGB4,NAGS,HAGLR,CEACAM1,SULT1B1,MTMR11,MVP,DPP4,OAS3,LAMC2,PAPSS2,TNFRSF11B,TFF3,LGALS9,CRYL1,PLLP,C1orf115,EFNA1,P2RX4,LY75,TM4SF1
GO: Biological Process	GO:0098771	inorganic ion homeostasis		2.39e-07	0.00161	2.68e-05	0.000252	45	678	HEXB,ENPP1,F2,CKB,ADORA1,MELTF,CAMK2N1,CLCN2,PIK3CB,AGT,SCNN1A,CCL5,PLCB4,ABCC2,ANPEP,ERO1A,FLVCR1,CP,SLC39A4,XK,CLSTN1,SLC1A1,ABCC6,SLC9A3,ATP1A1,ATP1B1,FXYD2,ATP2A3,SRI,SLC46A1,STEAP2,ITPR3,DIAPH1,SLC39A5,CA12,KCNE3,SLC11A2,NOL3,TMPRSS6,ATP13A2,TF,TFRC,CNNM4,ENTPD5,SLC39A14
GO: Biological Process	GO:0040011	locomotion		2.59e-07	0.00174	2.86e-05	0.000268	92	1861	PCSK5,CEACAM5,ENPP2,SERPINF1,CEACAM7,CARD10,ACVRL1,KLF4,HNF4A,F3,DSCAML1,PLEKHH1,ADORA1,MGAT3,SEMA6D,MTUS1,SH3RF2,PIK3CB,AGT,CCL5,PLAUR,SMPD3,MMP7,CCL20,PLG,CXCL5,ALOX15B,OSGIN1,VEGFA,DUOXA2,VIL1,SEMA4B,VTN,EPB41L4B,CAMSAP3,DUOX2,CXCL14,APOA1,CLDN3,CLDN7,SEMA4G,MST1,IGF2,PLPP3,PRKCD,CTNNA1,MAPK3,IL6R,CXADR,SORL1,CEACAM6,SPOCK2,TNFRSF11A,GCNT1,PTAFR,ITGB2,GDNF,CEACAM1,IGSF10,BMP2,PTPRJ,SEMA3B,DIAP…
Coexpression	M12272	MISSIAGLIA_REGULATED_BY_METHYLATION_UP	C2:CGP: Chemical and Genetic Perturbations	2.61e-07	0.00251	1.01e-05	9.87e-05	15	125	MELTF,PLAUR,CCL20,UBD,IFNGR1,TXNIP,SLC6A8,IGF2,ATF3,ATP1B1,PRSS8,ISG20,P4HA2,RCAN1,LGALS9
Coexpression Atlas	gudmap_developingKidney_e15.5_200_k5	DevelopingKidney_e15.5_anlage of loop of Henle_emap-31283_k-means-cluster#5_top-relative-expression-ranked_200	Gudmap Mouse MOE430.2	2.65e-07	0.00108	2.65e-06	2.36e-05	9	33	HNF4A,AFP,ALDOB,RBM47,ATP1B1,FXYD2,PAQR5,GGT1,DPP4
Coexpression Atlas	Facebase_ST1_Univ_500_2	UniversalReference_WholeMouseP1_top-relative-expression-ranked_500_2	FaceBase_ST1	2.65e-07	0.00108	2.65e-06	2.36e-05	9	33	TTR,FABP1,AFP,FGB,ALDOB,APOA4,SLC27A2,TF,TFF3
Transcription Factor Binding Site	RTAAACA_V$FREAC2_01	RTAAACA_V$FREAC2_01	TFBS	2.67e-07	0.000268	2.27e-05	0.00017	40	745	PCSK5,CDX2,ENPP2,MGLL,MFNG,HOXC6,NDRG1,SEMA6D,HPN,PLAG1,CXCL5,SELENOP,APOA2,APOB,CLSTN1,SEMA4G,TXNIP,PLPP3,CADPS,MAPK3,OCLN,RNF39,STX16,SDCBP2,GALNT3,SPOCK2,ISG20,GDNF,BMP2,SLC38A3,HNF1A,TCF7L2,TRIM2,RCAN1,GRIK3,RASSF6,ARHGAP12,LRRC1,RORA,ARHGEF2
Coexpression Atlas	PCBC_ratio_EB_vs_SC_1000	ratio_EmbryoidBody_vs_StemCell_top-relative-expression-ranked_1000	PCBC	2.69e-07	0.00109	2.68e-06	2.38e-05	58	994	CDX2,SLCO2B1,TMEM176A,F2,TTR,FABP1,TMEM132C,HAVCR1,SERPINA1,HOXC6,SH3RF2,AFP,PCDH19,AGT,FGB,SMPD3,FBXO32,PLG,GLTPD2,MUC20,VTN,CXCL14,APOA1,APOA2,POU4F1,APOA4,APOB,HAPLN1,IGF2,FRZB,C15orf48,PRDM16,URAD,PAG1,GBP3,GDNF,ITIH2,CFB,HAGLR,GIPR,PTPRH,LCN15,SLC39A5,GNRH2,NPNT,NDNF,NTRK1,RBP4,TF,GREM2,ABCC6P1,RNASE4,SLC16A3,TM4SF4,CCDC183,TM4SF1,RSPO1,CDH17
Coexpression	M9595	GSE42021_CD24HI_VS_CD24LOW_TCONV_THYMUS_DN	C7:IMMUNESIGDB: ImmuneSigDB	2.71e-07	0.00261	1.04e-05	0.000102	19	199	HK2,SQOR,AK4,CCL5,PLAUR,SELENOP,TDP2,ZFP36,IFNGR1,CCDC68,CTSS,TNFSF10,IRF1,ISG20,CFB,CEACAM1,ADAP1,TRIM31,SLC25A22
Coexpression	M5745	GSE7852_LN_VS_THYMUS_TCONV_UP	C7:IMMUNESIGDB: ImmuneSigDB	2.71e-07	0.00261	1.04e-05	0.000102	19	199	RGMB,ENPP1,CYP2S1,CKB,S100A6,PIK3CB,AFP,SCD,PRR13,CCL5,OSGIN1,TDP2,TTC39B,INSIG1,GCNT1,DMBT1,TRIM2,LAMC2,MAP7
Coexpression Atlas	gudmap_developingLowerUrinaryTract_P2_bladder urothelium (LCM)_100	DevelopingLowerUrinaryTract_P2_bladder urothelium (LCM)_emap-30380_top-relative-expression-ranked_100	Gudmap Mouse MOE430.2	2.77e-07	0.00113	2.76e-06	2.45e-05	13	77	GCNT3,TLCD4,ATP8B1,TTR,POF1B,S100A6,FXYD3,TMEM45B,ABCC3,PAQR5,LGALS3,TSPAN8,TMPRSS2
Transcription Factor Binding Site	V$HNF4_01	V$HNF4_01	TFBS	2.79e-07	0.000281	2.27e-05	0.00017	19	212	ERBB3,CDX2,SERPINF1,F2,CLCN2,SELENOP,PPARA,LRRC19,PRKCD,PRKCSH,PRDM16,CDHR5,APOM,SEMA3B,HNF1A,SLC26A3,NR1H3,LGALS4,SLC22A18
Coexpression Atlas	facebase_RNAseq_e10.5_NeuroEpith_central_2500_K2	facebase_RNAseq_e10.5_NeuroEpith_central_2500_K2	Gudmap RNAseq	2.79e-07	0.00114	2.76e-06	2.46e-05	16	118	MGAT4A,PLEKHH1,CAMSAP3,SEMA4G,LSR,OCLN,ABHD3,ATP10B,TRIM14,KLF5,MARVELD3,SLC27A2,AHCYL2,KIAA1217,ENTPD5,EPCAM
Coexpression Atlas	gudmap_developingLowerUrinaryTract_e15.5_Urothelium_500_k1	DevelopingLowerUrinaryTract_e15.5_Urothelium_emap-28091_k-means-cluster#1_top-relative-expression-ranked_500	Gudmap Mouse MOE430.2	2.79e-07	0.00114	2.76e-06	2.46e-05	16	118	ERBB3,LDOC1,F3,HOXD1,UGT8,CLDN7,CCDC68,OCLN,SORL1,PRSS8,GCNT1,KLF5,MARVELD3,LAMC2,GLB1L2,EPCAM
Coexpression	M45707	HE_LIM_SUN_FETAL_LUNG_C1_PROXIMAL_SECRETORY_1_CELL	C8: Cell Type Signature	2.8e-07	0.00269	1.07e-05	0.000105	14	109	B3GALT5,FAM3D,SERPINA1,SCNN1A,MUC20,CP,BRINP2,ATP2A3,SOD3,TNFSF10,CEACAM6,ITIH2,CAPN8,GALNT12
Coexpression Atlas	ratio_EB_vs_SC_2500_K3	ratio_EmbryoidBody_vs_StemCell_top-relative-expression-ranked_2500_k-means-cluster#3	PCBC	2.8e-07	0.00114	2.76e-06	2.46e-05	62	1094	CDX2,ENPP2,F2,HNF4A,TTR,FABP1,MEP1A,TMEM132C,HAVCR1,SERPINA1,HOXC6,AFP,PCDH19,FGB,PLG,GLTPD2,SELENOP,VTN,LMNTD2,CXCL14,APOA1,APOA2,POU4F1,APOA4,APOB,ABCC6,HAPLN1,SLC9A3,IGF2,FRZB,MTTP,URAD,PAG1,MASP1,GDNF,ELOVL2,ITIH2,GJB1,PTPRH,LCN15,MVP,SLC39A5,GNRH2,NPNT,CPEB2,NDNF,DPP4,P4HA2,RCAN1,TMPRSS6,RBP4,TF,GREM2,TGFBR3,ABCC6P1,RNASE4,EVA1B,P4HA1,TM4SF4,CD68,CCDC183,CDH17
GO: Cellular Component	GO:0016328	lateral plasma membrane		2.91e-07	0.000182	7.27e-06	5.1e-05	15	104	ERBB3,CEACAM5,CEACAM7,CLDN3,CLDN7,ABCC6,ATP1A1,OCLN,ATP1B1,MYO1A,CEACAM6,CEACAM1,GJB1,SLC16A3,EPCAM
Coexpression	M8776	HELLER_SILENCED_BY_METHYLATION_UP	C2:CGP: Chemical and Genetic Perturbations	2.92e-07	0.00281	1.08e-05	0.000105	23	283	TSPAN15,EPHX2,GCNT3,HLA-DMA,HLA-DMB,ENPP2,SERPINF1,KLF4,S100A6,UBD,CLDN3,DOK4,MUC1,CTSS,IL6R,CYP3A5,ISG20,TNFRSF11A,CFB,NQO1,LAMC2,ATP13A2,TFF2
Transcription Factor Binding Site	M29981	GREB1_TARGET_GENES	MSigDB	2.93e-07	0.000295	2.27e-05	0.00017	47	954	RGMB,CARD10,ATP8B1,LRG1,MYORG,ABHD17C,SERPINA1,NDRG1,MTUS1,HPN,SCNN1A,RBM47,CORO2A,PRR15L,TMPRSS4,SLC51B,ZFYVE28,SLC17A9,PRKCD,ATF3,STX16,SRI,ISG20,ITGB2,TMBIM1,CAPN8,SULT1A1,CHPT1,PTPRH,VILL,SEMA3B,SLC27A2,CA12,ADAP1,SLC11A2,ARRDC4,TMPRSS6,SLC19A3,TRIM31,AHCYL2,RGS3,LLGL2,SLC16A3,KIAA1217,PAM,CCDC183,PCDH1
Coexpression	M8099	GSE24972_MARGINAL_ZONE_BCELL_VS_FOLLICULAR_BCELL_IRF8_KO_UP	C7:IMMUNESIGDB: ImmuneSigDB	2.93e-07	0.00282	1.08e-05	0.000105	19	200	HLA-DMA,HLA-DMB,TMEM37,PRKCSH,C11orf86,FXYD2,IPMK,MYO1D,IRF1,SPOCK2,APOBR,BUD31,PAPSS2,TF,USP2,EVA1B,KIAA1217,TM4SF1,MXD1
Coexpression	M9598	GSE42021_TCONV_PLN_VS_CD24HI_TCONV_THYMUS_UP	C7:IMMUNESIGDB: ImmuneSigDB	2.93e-07	0.00282	1.08e-05	0.000105	19	200	KLF4,SQOR,AK4,CXCL5,VEGFA,ZFP36,CCDC68,ATF3,CTSS,ACSL5,ERAP1,IRF1,ISG20,CEACAM1,ADAP1,TRIM31,AHCYL2,SLC25A22,PCSK6
Coexpression	M4971	GSE29618_PDC_VS_MDC_DAY7_FLU_VACCINE_DN	C7:IMMUNESIGDB: ImmuneSigDB	2.93e-07	0.00282	1.08e-05	0.000105	19	200	HK2,TUBA4A,SERPINA1,MFNG,PIK3CB,QPCT,AOAH,ATP1B1,ACSL5,CIDEB,APOBR,ITGB2,MTMR11,OAS3,LGALS3,LGALS9,PAK1,ARHGAP45,PADI2
Coexpression	M5934	HALLMARK_XENOBIOTIC_METABOLISM	H: Hallmark	2.93e-07	0.00282	1.08e-05	0.000105	19	200	CYP2S1,HNF4A,FABP1,ABCC2,PLG,VTN,TMEM176B,ASL,ABCC3,CYP27A1,RETSAT,CFB,NQO1,CA2,RBP4,PAPSS2,ENTPD5,CDA,PC
Coexpression	M5953	HALLMARK_KRAS_SIGNALING_UP	H: Hallmark	2.93e-07	0.00282	1.08e-05	0.000105	19	200	TMEM176A,KLF4,PLAUR,CCL20,TMEM176B,ERO1A,HKDC1,IGF2,IL2RG,CTSS,GALNT3,ITGB2,CFB,BMP2,SEMA3B,CA2,RBP4,MAP7,USH1C
Coexpression	M5494	GSE3982_MAC_VS_BCELL_UP	C7:IMMUNESIGDB: ImmuneSigDB	2.93e-07	0.00282	1.08e-05	0.000105	19	200	SQOR,PIK3CB,AK4,ERO1A,DHRS11,VSIG10,CTNNA1,ABCC3,MYO6,APOBR,MTMR11,FZD5,TMEM70,P4HA2,DPYSL2,RCAN1,RBP4,OAS3,CDA
Coexpression	M5727	GSE7852_TREG_VS_TCONV_LN_UP	C7:IMMUNESIGDB: ImmuneSigDB	2.93e-07	0.00282	1.08e-05	0.000105	19	200	HK2,ABHD17C,NDRG1,PLCB4,FBXO32,ALOX15B,CORO2A,ANXA4,CDCP1,SLC22A5,CTNNA1,FXYD2,SDCBP2,DGAT1,TRIM14,TMBIM1,AHCYL2,RORA,MXD1
Coexpression	M4346	GSE20366_CD103_POS_VS_CD103_KLRG1_DP_TREG_DN	C7:IMMUNESIGDB: ImmuneSigDB	2.93e-07	0.00282	1.08e-05	0.000105	19	200	CYP2S1,LDOC1,S100A6,CAMK2N1,PRR13,CCL5,SMPD3,TMEM37,MUC1,SOD3,GALNT3,PTPRJ,COBL,NPNT,KIF13B,STBD1,TF,RNASE4,EPCAM
Coexpression	M3082	GSE10325_BCELL_VS_MYELOID_DN	C7:IMMUNESIGDB: ImmuneSigDB	2.93e-07	0.00282	1.08e-05	0.000105	19	200	HEXB,GOLM1,KLF4,SERPINA1,FCGRT,QPCT,PLAUR,AOAH,FAR2,PRKCD,NAAA,NAGA,MTMR11,SULT1A1,CALML4,TCF7L2,LGALS3,PAK1,CDA
Coexpression	M3088	GSE10325_LUPUS_CD4_TCELL_VS_LUPUS_MYELOID_DN	C7:IMMUNESIGDB: ImmuneSigDB	2.93e-07	0.00282	1.08e-05	0.000105	19	200	HEXB,HLA-DMA,GOLM1,KLF4,SERPINA1,FCGRT,QPCT,PLAUR,TMEM164,RBM47,ANPEP,IFNGR1,PRKCD,CTNNA1,SLC36A1,NAGA,APOBR,LGALS3,CLMN
Coexpression Atlas	gudmap_developingKidney_e15.5_Medullary collecting duct_200_k3	DevelopingKidney_e15.5_Medullary collecting duct_emap-28063_k-means-cluster#3_top-relative-expression-ranked_200	Gudmap Mouse MOE430.2	2.94e-07	0.0012	2.89e-06	2.57e-05	10	43	GCNT3,PLAC8,TFCP2L1,HOXD1,SGPP2,TMC4,CLDN3,CLDN7,OCLN,PRDM16
Coexpression Atlas	gudmap_developingKidney_e15.5_Podocyte cells_500_k3	DevelopingKidney_e15.5_Podocyte cells_emap-27915_k-means-cluster#3_top-relative-expression-ranked_500	Gudmap Mouse MOE430.2	2.94e-07	0.0012	2.89e-06	2.57e-05	10	43	B3GALT5,SERPINA1,SLC1A1,MYO6,TINAG,NPNT,CA12,DPP4,TF,PRR15
Coexpression Atlas	Arv_SC_fibroblast_1000_K2	AravindRamakr_StemCell_from_inducedPluripotentialStemCells_derived from_from_fibroblast_top-relative-expression-ranked_1000_k-means-cluster#2	PCBC	2.95e-07	0.0012	2.89e-06	2.57e-05	39	554	SYN3,RIMKLA,B3GALT5,CYP2S1,ZBED10P,FOXA3,HNF4G,HPN,CGN,SCNN1A,RBM47,LRRC75A,VIL1,EPB41L4B,CLDN3,LSR,SLC15A1,IGSF1,MUC3A,MUC4,TJP3,PRSS8,GDPD2,NELL2,NR1I2,TMEM92,COBL,MARVELD3,TRIM15,INHBE,RAB17,CECR2,B3GNT7,MAP7,SLC44A4,NSUN7,LLGL2,TMPRSS2,EPCAM
Coexpression	M2769	ESC_V6.5_UP_EARLY.V1_DN	C6: Oncogenic Signature	3e-07	0.00289	1.1e-05	0.000107	17	162	SERPINF1,KLF4,S100A6,DEGS2,SERPINF2,UBD,MOGAT2,BHLHE40,IGF2,CADPS,MYO7B,CFB,FZD5,CALML4,GPX2,LAMC2,TM4SF1
Coexpression	M39225	LAKE_ADULT_KIDNEY_C6_PROXIMAL_TUBULE_EPITHELIAL_CELLS_FIBRINOGEN_POS_S3	C8: Cell Type Signature	3.04e-07	0.00293	1.11e-05	0.000108	18	181	HINT1,SERPINA1,HOOK1,AGT,FGB,SERPINF2,CXCL14,SLC3A1,UNC5CL,NT5C2,TNFSF10,GATM,TINAG,LPGAT1,COBL,ATP11A,SLC27A2,GPX3
Coexpression Atlas	GSM538277_500	Myeloid Cells, DC.IIhilang-103-11blo.SLN, MHCIIhi CD11c+ Langerin- CD103- CD11b-, Lymph Node, avg-3	Immgen.org, GSE15907	3.05e-07	0.00124	2.98e-06	2.65e-05	31	386	TMEM176A,DSCAML1,SEMA6D,SCD,CCL5,TMEM176B,ANPEP,ANXA4,VSIG10,ZFP36,ATF3,CTNNA1,CYP27A1,TNFRSF11A,PTAFR,ATP11A,NDNF,ADAP1,CXCL16,PAPSS2,TSPAN3,SLC44A1,EFNA2,CLMN,RASA4,SERPINB1,PAM,NOSTRIN,LY75,MXD1,STOM
Coexpression Atlas	gudmap_kidney_adult_GlomCapSys_Tie2_500	kidney_adult_GlomCapSys_Tie2_top-relative-expression-ranked_500	Gudmap Mouse MOE430.2	3.07e-07	0.00125	2.99e-06	2.66e-05	33	427	MGLL,ACVRL1,KLF4,PLAC8,S100A6,SERPINA1,CLIC5,SCD,PLAUR,SELENOP,IFNGR1,TXNIP,PLPP3,SLCO2A1,ATP2A3,IL2RG,TNFSF10,ERAP1,RAPGEF5,GCHFR,GCNT1,TMBIM1,CEACAM1,BMP2,CALML4,TCN2,LGALS9,LMO7,TSPAN8,SERPINB1,NOSTRIN,TM4SF1,PCDH1
Coexpression Atlas	gudmap_developingKidney_e14.5 whole kidney - wildtype_100_k3	DevelopingKidney_e14.5 whole kidney - wildtype_emap-6674_k-means-cluster#3_top-relative-expression-ranked_100	Gudmap Mouse MOE430.2	3.15e-07	0.00128	3.06e-06	2.72e-05	8	25	HNF4A,MEP1A,AFP,ALDOB,FXYD2,GGT1,TINAG,AMN
Coexpression Atlas	gudmap_developingKidney_e15.5_Proximal Tubules_100_k1	DevelopingKidney_e15.5_Proximal Tubules_emap-28005_k-means-cluster#1_top-relative-expression-ranked_100	Gudmap Mouse MOE430.2	3.15e-07	0.00128	3.06e-06	2.72e-05	8	25	MEP1A,AFP,ALDOB,SLC3A1,FXYD2,CDHR2,TINAG,AMN
Coexpression Atlas	GSM538258_500	Myeloid Cells, DC.8+.Sp, CD11b CD4 CD45 CD11c CD8a, Spleen, avg-2	Immgen.org, GSE15907	3.16e-07	0.00129	3.06e-06	2.72e-05	32	407	HLA-DMA,TMEM176A,PLAC8,CKB,FCGRT,PIK3CB,CCL5,RBM47,TMEM176B,ANPEP,CTSS,NAAA,CYP27A1,NAGA,GATM,TNFRSF11A,PTAFR,DPP4,ARRDC4,CXCL16,PAPSS2,TSPAN3,LGALS3,CD7,RASA4,GUSB,SCARB1,PAK1,CD68,NOSTRIN,LY75,STOM
Coexpression	MM1294	OHGUCHI_LIVER_HNF4A_TARGETS_DN	M2:CGP: Chemical and Genetic Perturbations	3.17e-07	0.00305	1.15e-05	0.000112	19	201	ERBB3,CEACAM5,SLCO2B1,SERPINF1,CEACAM7,HAVCR1,SERPINA1,APOA4,ABCC6,SLC3A1,MTTP,CIDEB,MASP1,CEACAM6,GCHFR,CEACAM1,APOM,SULT1B1,ENTPD8
Coexpression Atlas	gudmap_developingLowerUrinaryTract_adult_ureter_100	DevelopingLowerUrinaryTract_adult_ureter_emap-29479_top-relative-expression-ranked_100	Gudmap Mouse MOE430.2	3.24e-07	0.00132	3.12e-06	2.78e-05	13	78	FAM3D,POF1B,MMP7,FXYD3,CP,GDA,TMEM45B,ABCC3,CYP2B6,CEACAM1,LGALS3,TSPAN8,TMPRSS2
Coexpression Atlas	gudmap_developingKidney_e14.5 whole kidney - wildtype_emap-6674_100	DevelopingKidney_e14.5 whole kidney - wildtype_emap-6674_top-relative-expression-ranked_100	Gudmap Mouse MOE430.2	3.24e-07	0.00132	3.12e-06	2.78e-05	13	78	HNF4A,MEP1A,CLIC5,AFP,ALDOB,RBM47,VIL1,ATP1B1,FXYD2,GGT1,TINAG,DPP4,AMN
Coexpression Atlas	Arv_EB-LF_2500_K2	AravindRamakr_EmbryoidBody-LF_top-relative-expression-ranked_2500_k-means-cluster#2	PCBC	3.26e-07	0.00133	3.14e-06	2.79e-05	56	951	CDX2,ENPP1,ENPP2,F2,TTR,FABP1,MEP1A,TMEM132C,HAVCR1,SERPINA1,HOXC6,AFP,PCDH19,FGB,PLAUR,PLG,PLOD2,SELENOP,VTN,CXCL14,APOA1,APOA2,POU4F1,APOA4,APOB,HAPLN1,IGF2,FRZB,MTTP,MASP1,CDHR2,GDNF,ELOVL2,GJB1,NELL2,PTPRH,LCN15,EPS8L3,SLC39A5,GNRH2,NPNT,NDNF,DPP4,P4HA2,RBP4,USH1C,PAPSS2,ATP10A,TF,GREM2,ORM1,ABCC6P1,EFNA2,P4HA1,TM4SF4,CDH17
Coexpression Atlas	Arv_SC-HD_1000_K1	AravindRamakr_StemCell-HD_top-relative-expression-ranked_1000_k-means-cluster#1	PCBC	3.38e-07	0.00138	3.24e-06	2.88e-05	39	557	SYN3,RIMKLA,B3GALT5,CYP2S1,ZBED10P,FOXA3,HNF4G,HPN,CGN,SCNN1A,RBM47,LRRC75A,VIL1,TMEM253,CLDN3,LSR,SLC15A1,IGSF1,MUC3A,MUC4,TJP3,PRSS8,GDPD2,NELL2,NR1I2,TMEM92,COBL,MARVELD3,INHBE,RAB17,CECR2,B3GNT7,MAP7,SLC44A4,NSUN7,MLXIPL,LLGL2,TMPRSS2,EPCAM
GO: Biological Process	GO:0009725	response to hormone		3.4e-07	0.00229	3.63e-05	0.000341	62	1092	CEACAM5,ACHE,ENPP1,SERPINF1,CEACAM7,HNF4A,ME1,CKB,SERPINA1,HPN,AGT,SCNN1A,FGB,FBXO32,ABCC2,ALDOB,ANG,PAQR8,APOA2,APOB,PPARA,ZFP36,LPIN3,TXNIP,IGF2,TRIB3,PRKCD,CTNNA1,MAPK3,ATP1A1,C1QTNF12,CTSS,SORL1,TNFSF10,INSIG1,PDX1,GATM,CEACAM6,IRF1,BCKDHB,TNFRSF11A,GCNT1,PTAFR,STEAP2,GDNF,CEACAM1,GGH,SULT1A1,PTPRJ,NQO1,CA2,CPEB2,DPEP1,RCAN1,RBP4,NR1H3,TNFRSF11B,TGFBR3,PAK1,PAM,SLC39A14,PADI2
GO: Biological Process	GO:0032940	secretion by cell		3.42e-07	0.0023	3.63e-05	0.000341	63	1117	PCSK5,CEACAM5,SYN3,ACHE,WIPF3,CEACAM7,F2,HNF4A,SNAP47,FAM3D,ADORA1,CAMK2N1,AGT,FGB,CCL5,SMPD3,FER1L5,ANG,ANXA4,MYO18A,SIRT6,CPT1A,SLC17A9,CADPS,MTTP,RAB11FIP5,C1QTNF12,MCTP2,DGAT1,MYO6,SRI,PDX1,CEACAM6,TNFRSF11A,PTAFR,STEAP2,ITGB2,GDNF,CEACAM1,GIPR,BMP2,BMP8B,NELL2,RAB3B,SLC38A3,HNF1A,DPYSL2,TCF7L2,RAB25,RBP4,NR1H3,SLC44A4,ATP13A2,SYT7,LGALS3,LGALS9,SLC25A22,LLGL2,MALRD1,P2RX4,PCSK6,PAK1,PAM
Coexpression Atlas	Facebase_RNAseq_e10.5_Mandibular Arch_2500_K4	FacebaseRNAseq_e10.5_Mandibular Arch_top-relative-expression-ranked_2500_k-means-cluster#4	FaceBase_RNAseq	3.43e-07	0.00139	3.28e-06	2.92e-05	26	290	MGAT4A,MTUS1,CGN,PLS1,LRRC75A,TMEM176B,CLDN7,CDCP1,CLSTN1,CCDC68,TTC39B,MYO1D,SPOCK2,BMP2,KLF5,TMEM163,NPNT,RAB25,MAP7,PAPSS2,GREM2,CNNM4,SLC44A1,LMO7,ENTPD5,HSD17B11
GO: Biological Process	GO:0045923	positive regulation of fatty acid metabolic process		3.45e-07	0.00232	3.63e-05	0.000341	11	54	HNF4A,FABP1,AGT,APOA4,PPARA,CPT1A,DGAT1,ACSL5,LPGAT1,NR1H3,MLXIPL
Coexpression Atlas	GSM538315_500	NK cells, NK.Sp, NK1.1+, Spleen, avg-3	Immgen.org, GSE15907	3.53e-07	0.00144	3.37e-06	3e-05	32	409	ENPP1,GOLM1,PFKP,CAMK2N1,PIK3CB,CCL5,ABCG2,PLOD2,CORO2A,AOAH,AGPAT2,BHLHE40,IFNGR1,ATP1B1,MCTP2,ATP2A3,TTC39B,MYO6,ARHGAP26,ACSS2,APOBR,ITGB2,RNF43,FZD5,TMEM163,CA2,NDNF,B3GNT7,CD7,PAM,PADI2,MXD1
Coexpression	M12621	LI_WILMS_TUMOR_VS_FETAL_KIDNEY_1_UP	C2:CGP: Chemical and Genetic Perturbations	3.58e-07	0.00345	1.3e-05	0.000126	18	183	SERPINF1,CARD10,HPN,PLS1,VEGFA,SELENOP,ANXA4,CLDN3,SLC22A5,ATP1A1,ATP1B1,IQGAP2,APOM,CA12,KIF13B,TRIM2,SLC35A3,LLGL2
Coexpression Atlas	gudmap_developingLowerUrinaryTract_P2_bladder urothelium (LCM)_1000_k5	DevelopingLowerUrinaryTract_P2_bladder urothelium (LCM)_emap-30380_k-means-cluster#5_top-relative-expression-ranked_1000	Gudmap Mouse MOE430.2	3.66e-07	0.00149	3.48e-06	3.09e-05	19	167	ERBB3,PLEKHH1,PLS1,CLDN7,CDCP1,CCDC68,OCLN,ATP1B1,SORL1,ANO9,PRSS8,GCNT1,KLF5,MARVELD3,LAMC2,CRYL1,RASSF6,EPCAM,CDH17
Coexpression Atlas	gudmap_developingKidney_e15.5_stage III -IV renal corpusc_200	DevelopingKidney_e15.5_stage III -IV renal corpusc_emap-27945_top-relative-expression-ranked_200	Gudmap Mouse MOE430.2	3.66e-07	0.00149	3.48e-06	3.09e-05	19	167	WIPF3,ADORA1,CLIC5,ALDOB,VEGFA,TMEM37,FXYD2,IQGAP2,GCHFR,GGT1,NDNF,DPP4,AMN,INF2,TSPAN8,PRR15,TM4SF1,CDH4,CDH16
Coexpression Atlas	Facebase_RNAseq_e10.5_Medial Nasal Eminence_1000	FacebaseRNAseq_e10.5_Medial Nasal Eminence_top-relative-expression-ranked_1000	FaceBase_RNAseq	3.68e-07	0.0015	3.49e-06	3.1e-05	57	979	ENPP1,ENPP2,SERPINF1,MGLL,CYP2S1,HAVCR1,SIAE,CLIC5,HOOK1,CGN,RBM47,CXCL5,PLS1,ALOX15B,VIPR1,SELENOP,ANXA4,SLC1A1,HAPLN1,LPIN3,ZFYVE28,TMEM45B,RHPN2,CCDC68,IGSF1,ATP1B1,MUC4,CTSS,TTC39B,MASP1,NAAA,MYO6,ARHGAP26,NAGA,GDPD2,PBLD,ISG20,APOBR,GGT1,GGH,BMP8B,MTMR11,CHPT1,TMEM163,RAB3B,SLC27A2,CA12,ADAP1,GLB1L2,LGALS4,LGALS9,SLC22A18,MLXIPL,LACTB2,RASA4,LRP4,EPCAM
Transcription Factor Binding Site	TTGTTT_V$FOXO4_01	TTGTTT_V$FOXO4_01	TFBS	3.69e-07	0.000371	2.65e-05	0.000199	67	1599	ERBB3,ENPP2,MGAT4A,MGLL,HNF4G,POF1B,CKB,ADORA1,HOXC6,NDRG1,SEMA6D,HOXD1,HOOK1,HPCAL1,UGT8,PLAG1,SMPD3,FBXO32,SEMA4B,SELENOP,MYO18A,APOA2,POU4F1,CLDN7,VSIG10,CLSTN1,SLC1A1,SEMA4G,HAPLN1,TXNIP,PLPP3,NT5C2,MAPK3,IGSF1,STX16,MXI1,MASP1,INSIG1,HCAR1,RILP,TRIM14,IL22RA1,ITGB4,SLC36A2,ITPR3,APOM,KLF5,SLC38A3,HNF1A,TCF7L2,SLC26A2,LAMC2,GRIK3,MAP7,RGS3,USP2,ABLIM1,RNASE4,EFNA1,LRRC1,CD68,TMPRSS2,PAM,RORA,…
Coexpression Atlas	gudmap_developingKidney_e15.5_early proxim tubul_200_k1	DevelopingKidney_e15.5_early proxim tubul_emap-28005_k-means-cluster#1_top-relative-expression-ranked_200	Gudmap Mouse MOE430.2	3.71e-07	0.00151	3.51e-06	3.12e-05	10	44	CHDH,MEP1A,AFP,ALDOB,SLC3A1,TINAG,CLRN3,SLC27A2,TMT1B,SLC44A4
Coexpression Atlas	GSM854312_500	Myeloid Cells, GN.UrAc.PC, CD11b+ Ly6-G+, Peritoneal Cavity, avg-3	Immgen.org, GSE15907	3.72e-07	0.00152	3.52e-06	3.13e-05	32	410	SQOR,LRG1,S100A6,MTUS1,PRR13,PLAUR,RBM47,OSGIN1,TMC4,GDA,C15orf48,ATF3,MCTP2,IL6R,DGAT1,SORL1,NAAA,ISG20,GCNT1,PTAFR,APOBR,CEACAM1,MVP,CPEB2,EGLN3,ARRDC4,OAS3,LGALS3,SLC44A1,SLC16A3,CD68,MXD1
GO: Biological Process	GO:0006826	iron ion transport		3.75e-07	0.00253	3.88e-05	0.000365	12	66	HAVCR1,MELTF,FLVCR1,CP,SLC46A1,STEAP2,HEPH,SLC11A2,TF,TFRC,SFXN1,SLC39A14
Coexpression Atlas	gudmap_developingKidney_e15.5_cortic collect duct_500_k2	DevelopingKidney_e15.5_cortic collect duct_emap-28132_k-means-cluster#2_top-relative-expression-ranked_500	Gudmap Mouse MOE430.2	3.77e-07	0.00154	3.56e-06	3.16e-05	13	79	ERBB3,GCNT3,PLAC8,HOXD1,SGPP2,HKDC1,CLDN3,CLDN7,OCLN,PRDM16,LAMC2,EPCAM,PADI2
Coexpression Atlas	gudmap_developingKidney_e15.5_cortic collect duct_100_k5	DevelopingKidney_e15.5_cortic collect duct_emap-28132_k-means-cluster#5_top-relative-expression-ranked_100	Gudmap Mouse MOE430.2	3.81e-07	0.00155	3.58e-06	3.18e-05	7	18	TFCP2L1,TMEM45B,GLB1L2,LGALS3,TSPAN8,TMPRSS2,CDH16
Coexpression Atlas	gudmap_developingLowerUrinaryTract_P2_bladder detrusor (LCM)_1000_k5	DevelopingLowerUrinaryTract_P2_bladder detrusor (LCM)_emap-30376_k-means-cluster#5_top-relative-expression-ranked_1000	Gudmap Mouse MOE430.2	3.92e-07	0.0016	3.68e-06	3.27e-05	17	136	SLCO2B1,MGAT4A,ATP8B1,F3,CLIC5,SCD,FBXO32,ANXA4,CPT1A,TXNIP,GDA,TMBIM1,NQO1,RAB17,ARRDC4,GREM2,TM4SF1
Coexpression Atlas	GSM538274_500	Myeloid Cells, DC.IIhilang-103-11b+.SLN, MHCIIhi CD11c+ Langerin- CD103- CD11b+, Lymph Node, avg-3	Immgen.org, GSE15907	3.93e-07	0.0016	3.68e-06	3.27e-05	32	411	TMEM176A,SEMA6D,CCL5,TMEM176B,ANPEP,ANXA4,VSIG10,BHLHE40,GDA,ATF3,CTNNA1,FXYD2,CTSS,CYP27A1,TNFRSF11A,PTAFR,CFB,ATP11A,MVP,NDNF,ADAP1,GALNT12,CXCL16,PAPSS2,TSPAN3,SLC44A1,RASA4,SERPINB1,NOSTRIN,LY75,MXD1,STOM
Coexpression	M34006	BLANCO_MELO_HUMAN_PARAINFLUENZA_VIRUS_3_INFECTION_A594_CELLS_UP	C2:CGP: Chemical and Genetic Perturbations	3.99e-07	0.00384	1.44e-05	0.00014	19	204	HK2,KLF4,PLAUR,CDCP1,ATF3,PRDM16,CTSS,TNFSF10,ERAP1,IRF1,GBP3,IRF7,TRIM14,CFB,CEACAM1,OAS3,LAMC2,CD68,MXD1
Coexpression	MM1037	MARTINEZ_RB1_TARGETS_UP	M2:CGP: Chemical and Genetic Perturbations	4e-07	0.00385	1.44e-05	0.00014	41	738	EPHX2,CEACAM5,SERPINF1,CEACAM7,MGLL,HNF4G,LRG1,FABP1,SCD,CCL20,ERO1A,SH3KBP1,CP,APOA4,ZFP36,TXNIP,MISP,IGF2,CIDEC,SLC22A5,FUT2,SDCBP2,IL2RG,ACSL5,SOD3,MASP1,CEACAM6,GBP3,GGT1,CEACAM1,CHPT1,SLC11A2,TF,TFRC,LGALS9,TGFBR3,CRYL1,SLC35A3,PCSK6,PC,STOM
Coexpression	M10761	PEREZ_TP63_TARGETS	C2:CGP: Chemical and Genetic Perturbations	4.03e-07	0.00387	1.44e-05	0.00014	26	356	PCSK5,LMNTD2-AS1,CKB,NDRG1,SEMA6D,SELENOP,EPB41L4B,CXCL14,SLC9A3,IGF2,DOK4,PLPP3,RASEF,ARHGAP26,CFB,BMP2,PTPRJ,ATP11A,TACC1,STBD1,RCAN1,MAP7,CNNM4,SUSD2,RORA,MXD1
GO: Biological Process	GO:1904970	brush border assembly		4.04e-07	0.00272	4.13e-05	0.000388	5	7	MYO7B,CDHR2,CDHR5,ANKS4B,USH1C
Coexpression	M2818	IL15_UP.V1_DN	C6: Oncogenic Signature	4.21e-07	0.00405	1.5e-05	0.000146	18	185	CEACAM7,SEMA6D,TXNIP,MISP,FUT2,ATP10B,TNFRSF11A,IL22RA1,GDNF,SLC26A3,TCN1,GPR35,GPX2,VWA7,LGALS4,EFNA1,ENTPD5,SERPINA5
Coexpression Atlas	gudmap_dev gonad_e13.5_M_SertoliCell_Sox9_500	dev gonad_e13.5_M_SertoliCell_Sox9_top-relative-expression-ranked_500	Gudmap Mouse ST 1.0	4.21e-07	0.00171	3.92e-06	3.48e-05	33	433	TSPAN15,ERBB3,HK2,ME1,ADORA1,SIAE,CLCN2,MTA3,HPCAL1,SCD,CGN,PLOD2,USP53,DHRS11,VSIG10,SLC6A8,CADPS,MASP1,IQGAP2,GATM,ACSS2,GDNF,CDC42SE2,TACC1,RAB3B,CPEB2,RCAN1,GREM2,P2RX4,KIAA1217,ENTPD5,PADI2,SLC6A14
Coexpression Atlas	Facebase_RNAseq_e10.5_Medial Nasal Eminence_1000_K3	FacebaseRNAseq_e10.5_Medial Nasal Eminence_top-relative-expression-ranked_1000_k-means-cluster#3	FaceBase_RNAseq	4.21e-07	0.00171	3.92e-06	3.48e-05	33	433	ENPP1,ENPP2,CYP2S1,HAVCR1,RBM47,CXCL5,ALOX15B,VIPR1,SELENOP,ANXA4,SLC1A1,HAPLN1,LPIN3,ZFYVE28,MUC4,CTSS,MASP1,NAAA,MYO6,NAGA,GDPD2,ISG20,APOBR,GGH,BMP8B,MTMR11,RAB3B,ADAP1,LGALS4,LGALS9,SLC22A18,RASA4,LRP4
Coexpression	M38973	JINESH_BLEBBISHIELD_VS_LIVE_CONTROL_DN	C2:CGP: Chemical and Genetic Perturbations	4.23e-07	0.00407	1.5e-05	0.000146	23	289	LDOC1,SQOR,HOXD1,QPCT,MMP7,CCL20,TXNIP,PNMA2,C15orf48,ATP1B1,SORL1,PRSS8,MYO1D,SRI,CFB,CA12,LAMC2,SYT7,TSPAN3,PLLP,TRNT1,SERPINB1,PAM
Coexpression Atlas	GSM854251_500	Myeloid Cells, DC.103+11b-.SI, CD45+ MHCII+ CD11c-hi CD103+ CD11b-, Small Intestine, avg-4	Immgen.org, GSE15907	4.33e-07	0.00176	4.02e-06	3.58e-05	30	372	HK2,HLA-DMA,ACVRL1,KLF4,CKB,SEMA6D,PIK3CB,QPCT,RBM47,ANPEP,ANXA4,BHLHE40,ZFP36,ATF3,CTSS,NAAA,CYP27A1,NAGA,GATM,TMBIM1,SULT1A1,ARRDC4,CXCL16,LGALS3,GUSB,PAK1,CD68,NOSTRIN,LY75,EPCAM
GO: Biological Process	GO:0055088	lipid homeostasis		4.56e-07	0.00307	4.59e-05	0.000431	22	219	EPHX2,TLCD4,HNF4A,ADORA1,SCD,HPN,NPC1L1,APOA1,APOA2,APOA4,APOB,MTTP,DGAT1,TTC39B,INSIG1,APOM,NR1H3,ATP13A2,MLXIPL,MALRD1,SCARB1,RORA
GO: Biological Process	GO:0051046	regulation of secretion		4.65e-07	0.00313	4.61e-05	0.000433	53	882	ERBB3,CEACAM5,ACHE,CEACAM7,F2,HNF4A,FAM3D,ADORA1,CAMK2N1,AGT,FGB,HRH2,CCL5,SMPD3,FER1L5,ANG,ANPEP,MYO18A,SIRT6,CPT1A,CADPS,RAB11FIP5,C1QTNF12,MCTP2,MYO6,SRI,PDX1,CEACAM6,TNFRSF11A,PTAFR,ITGB2,GDNF,CEACAM1,GIPR,BMP2,BMP8B,NELL2,RAB3B,HNF1A,DPYSL2,TCF7L2,RBP4,NR1H3,ATP13A2,SYT7,LGALS3,TFF2,LGALS9,SLC25A22,LLGL2,MALRD1,P2RX4,PAM
Coexpression	MM1018	CUI_TCF21_TARGETS_2_DN	M2:CGP: Chemical and Genetic Perturbations	4.81e-07	0.00463	1.7e-05	0.000166	46	883	WIPF3,CARD10,MGLL,ATP8B1,KLF4,CLIC5,MTUS1,SCD,PLOD2,VEGFA,ANXA4,MYO18A,VSIG10,TXNIP,PLPP3,SLCO2A1,ATP2A3,IL2RG,CTSS,PAG1,MYO1D,IQGAP2,MYO6,RAPGEF5,ARHGAP26,TMBIM1,CHPT1,PTPRJ,SEMA3B,DIAPH2,TACC1,CPEB2,DPP4,DPYSL2,RCAN1,ATP10A,TNFRSF11B,TGFBR3,P2RX4,INF2,LMO7,TSPAN8,RORA,PRR15,NOSTRIN,TM4SF1
GO: Biological Process	GO:0019217	regulation of fatty acid metabolic process		4.86e-07	0.00328	4.75e-05	0.000446	17	137	CEACAM5,CEACAM7,HNF4A,FABP1,AGT,APOA4,PPARA,CPT1A,TRIB3,DGAT1,ACSL5,INSIG1,CEACAM6,CEACAM1,LPGAT1,NR1H3,MLXIPL
Coexpression Atlas	ratio_EB_vs_SC_500_K3	ratio_EmbryoidBody_vs_StemCell_top-relative-expression-ranked_500_k-means-cluster#3	PCBC	4.89e-07	0.00199	4.53e-06	4.03e-05	21	204	CDX2,TTR,FABP1,TMEM132C,SERPINA1,HOXC6,AFP,FGB,PLG,VTN,CXCL14,APOA1,APOA2,APOB,IGF2,PRDM16,LCN15,GNRH2,NPNT,RBP4,TF
Coexpression Atlas	gudmap_developingKidney_e15.5_S-shaped body_1000_k4	DevelopingKidney_e15.5_S-shaped body_emap-27855_k-means-cluster#4_top-relative-expression-ranked_1000	Gudmap Mouse MOE430.2	4.97e-07	0.00202	4.6e-06	4.09e-05	16	123	HLA-DMB,PLCXD1,MGLL,PLEKHH1,TFCP2L1,SGPP2,CLDN7,PRDM16,ITPR3,PTPN3,NPNT,WSCD1,LAMC2,RASSF6,TSPAN8,CDH16
Transcription Factor Binding Site	M30400	ZNF92_TARGET_GENES	MSigDB	5.07e-07	0.00051	3.4e-05	0.000255	62	1448	ERBB3,CHDH,ST6GALNAC6,FOXA3,ADORA1,MELTF,TFCP2L1,MFNG,FCGRT,HPN,SCNN1A,QPCT,PLAUR,DEGS2,RBM47,BAIAP2L2,OSGIN1,SEMA4B,FLNB,ANPEP,AOAH,SH3KBP1,KIF16B,MYO18A,SIRT6,CLSTN1,ZFYVE28,LSR,TRIB3,DOK4,PLPP3,CADPS,SLC22A5,NT5C2,PRKCD,ARHGAP27,TJP3,CAPN12,KIF12,ITGB4,DIAPH2,GPR35,TMPRSS6,NTRK1,OAS3,SLC44A4,ATP13A2,RGS3,SLC22A18,RNF220,EVA1B,SLC16A3,INF2,CLMN,ZFYVE19,PRR15,PC,ARHGAP45,TM4SF1,PADI2,PCDH1,CDH4
Coexpression Atlas	PCBC_MESO-5_blastocyst_500	Progenitor-Cell-Biology-Consortium_induced-Mesoderm_fromBlastocyst-derived-humanEmbryonicStemCells_top-relative-expression-ranked_500	PCBC	5.09e-07	0.00207	4.69e-06	4.17e-05	35	479	ZBED10P,FOXA3,HNF4A,MYORG,VIL1,FA2H,CAMSAP3,APOA1,APOA2,CLDN3,CLDN7,LSR,SLCO2A1,FRZB,TJP3,PRSS8,GATM,PAQR5,KIF12,TNFRSF11A,ELOVL2,BMP2,TMEM92,FZD5,B4GALNT3,RAB25,RAB17,GRIK3,USH1C,GREM2,ACE2,USP2,MLXIPL,TMPRSS2,EPCAM
Coexpression Atlas	gudmap_developingLowerUrinaryTract_adult_ureter_1000_k4	DevelopingLowerUrinaryTract_adult_ureter_emap-29479_k-means-cluster#4_top-relative-expression-ranked_1000	Gudmap Mouse MOE430.2	5.09e-07	0.00207	4.69e-06	4.17e-05	13	81	GCNT3,ENPP1,TLCD4,SQOR,TTR,S100A6,FXYD3,ANXA4,SDCBP2,PAQR5,ISG20,TPPP,TMPRSS2
Coexpression Atlas	GSM854309_500	Myeloid Cells, GN.Thio.PC, CD11b+ Ly6-G+, Peritoneal Cavity, avg-3	Immgen.org, GSE15907	5.14e-07	0.00209	4.72e-06	4.2e-05	32	416	SQOR,LRG1,S100A6,MTUS1,PRR13,PLAUR,RBM47,OSGIN1,SLC39A4,BHLHE40,GDA,C15orf48,PRKCD,ATF3,IL6R,SORL1,MYO1D,ISG20,PTAFR,CEACAM1,GGH,NQO1,MVP,EGLN3,ARRDC4,OAS3,LGALS3,SLC44A1,SLC16A3,P4HA1,CD68,MXD1
GO: Molecular Function	GO:0003779	actin binding		5.27e-07	0.000778	6.31e-05	0.000497	37	500	CEACAM5,WIPF3,CEACAM7,POF1B,HOOK1,AFP,CGN,SCNN1A,PLS1,VIL1,FLNB,ANG,CORO2A,CAMSAP3,MYO18A,MISP,SHROOM1,CTNNA1,SPIRE2,MYO1A,MYO1D,IQGAP2,MYO6,MYO7B,CEACAM6,GBP3,CEACAM1,VILL,DIAPH1,DIAPH2,COBL,EPS8L3,ESPN,USH1C,ABLIM1,INF2,CLMN
Coexpression Atlas	gudmap_kidney_e10.5_UretericTrunk_HoxB7_500	kidney_e10.5_UretericTrunk_HoxB7_top-relative-expression-ranked_500	Gudmap Mouse MOE430.2	5.31e-07	0.00216	4.86e-06	4.32e-05	31	396	ERBB3,HLA-DMB,LDOC1,PLAC8,TFCP2L1,HOXD1,HOOK1,SCD,PCDH19,AK4,ANPEP,SGPP2,CLDN7,HAPLN1,TMEM37,OCLN,MUC1,PRDM16,PRSS8,GALNT3,PTPN3,NPNT,DPP4,KCNE3,CECR2,LAMC2,TFRC,PAK1,TMPRSS2,EPCAM,CDH16
Coexpression Atlas	Facebase_RNAseq_e8.5_Non-Floor Plate Neural Epithelium_2500_K4	FacebaseRNAseq_e8.5_Non-Floor Plate Neural Epithelium_top-relative-expression-ranked_2500_k-means-cluster#4	FaceBase_RNAseq	5.32e-07	0.00216	4.86e-06	4.32e-05	27	316	MGAT4A,MTUS1,CGN,PLS1,LRRC75A,TMEM176B,CAMSAP3,CDCP1,CLSTN1,RHPN2,CCDC68,TTC39B,PRSS8,MYO1D,SPOCK2,BMP2,KLF5,TMEM163,NPNT,WSCD1,RAB25,MAP7,PAPSS2,GREM2,SLC44A1,LMO7,ENTPD5
Coexpression Atlas	Facebase_RNAseq_e9.5_Olfactory Placode_500_K2	FacebaseRNAseq_e9.5_Olfactory Placode_top-relative-expression-ranked_500_k-means-cluster#2	FaceBase_RNAseq	5.39e-07	0.0022	4.92e-06	4.37e-05	20	188	ERBB3,CGN,RBM47,PLS1,CAMSAP3,SGPP2,CLDN3,CLDN7,CDCP1,RHPN2,CCDC68,RASEF,ACSL5,PRSS8,KLF5,SLC27A2,RAB25,LLGL2,KIAA1217,EPCAM
GO: Biological Process	GO:0045834	positive regulation of lipid metabolic process		5.55e-07	0.00373	5.34e-05	0.000501	21	204	F2,HNF4A,FABP1,ADORA1,AGT,SMPD3,APOA1,APOA2,APOA4,PPARA,CPT1A,IGF2,PRKCD,DGAT1,ACSL5,LPGAT1,TCF7L2,NR1H3,MLXIPL,SCARB1,PC
GO: Molecular Function	GO:0022857	transmembrane transporter activity		5.56e-07	0.000821	6.31e-05	0.000497	68	1213	TMEM144,CEACAM5,SLCO2B1,CEACAM7,LRG1,FABP1,S100A6,CLCN2,CLIC5,AFP,SCNN1A,ABCG2,ABCC2,SLC51A,FXYD3,FLVCR1,SLC39A4,TMC4,SLC1A1,ABCC6,SLC3A1,SLC51B,SLC6A8,SLC9A3,SLC15A1,SLC17A9,SLCO2A1,SLC22A5,TMEM37,SLC45A1,ATP1A1,ATP1B1,ATP2A3,ABCC3,ANO9,SLC36A1,CEACAM6,SLC46A1,SLC36A2,CEACAM1,ITPR3,GJB1,SLC39A5,SLC38A3,SLC27A2,SLC26A3,KCNE3,SLC11A2,SLC26A2,RBP4,SLC19A3,SLC17A4,GRIK3,SLC44A4,ATP13A2,TFRC,SFXN1,SL…
Coexpression	M2345	FARDIN_HYPOXIA_11	C2:CGP: Chemical and Genetic Perturbations	5.69e-07	0.00548	2.01e-05	0.000196	8	32	NDRG1,AK4,VEGFA,BHLHE40,TXNIP,MXI1,P4HA2,EGLN3
Coexpression Atlas	GSM854338_500	Myeloid Cells, GN.Arth.SynF, CD11b+ Ly6-G+, Synovial Fluid, avg-3	Immgen.org, GSE15907	5.71e-07	0.00232	5.19e-06	4.61e-05	32	418	SQOR,LRG1,S100A6,MTUS1,PLAUR,RBM47,OSGIN1,VEGFA,BHLHE40,GDA,C15orf48,ATF3,DGAT1,SORL1,MYO1D,ISG20,GCNT1,PTAFR,APOBR,CEACAM1,CPEB2,EGLN3,TCN2,ARRDC4,GPR35,OAS3,TF,LGALS3,SLC44A1,SLC16A3,CD68,MXD1
Coexpression Atlas	GSM605836_500	Myeloid Cells, DC.8-4-11b-.MLN, CD45-APC CD11b-FITC CD11c-eFluor780 CD4-PE CD8a-eF, Lymph Node, avg-3	Immgen.org, GSE15907	5.71e-07	0.00232	5.19e-06	4.61e-05	32	418	TMEM176A,NDRG1,SEMA6D,PIK3CB,CCL5,RBM47,TMEM176B,ANPEP,ANXA4,VSIG10,ATF3,CTNNA1,CYP27A1,TNFRSF11A,CFB,PTPN3,ATP11A,MVP,CA2,DPP4,ADAP1,ARRDC4,SLC26A2,CXCL16,PAPSS2,TSPAN3,SLC44A1,RASA4,SERPINB1,NOSTRIN,LY75,MXD1
Coexpression Atlas	GSM854280_500	Myeloid Cells, DC.11cloSer.SI, CD45+ MHCII+ CD11c-lo CD11b+, Small Intestine, avg-5	Immgen.org, GSE15907	5.74e-07	0.00234	5.21e-06	4.63e-05	30	377	HK2,HLA-DMA,SLCO2B1,MGAT4A,TMEM176A,KLF4,SEMA6D,FCGRT,PLAUR,RBM47,SELENOP,TMEM176B,ANPEP,AOAH,CP,ZFP36,ATF3,CTSS,ABCC3,CYP27A1,GATM,TNFRSF11A,PTAFR,BMP2,PTPRJ,CXCL16,TF,LGALS3,RNASE4,CD68
Coexpression	M39169	MURARO_PANCREAS_BETA_CELL	C8: Cell Type Signature	5.75e-07	0.00553	2.02e-05	0.000197	48	946	RIMKLA,MGAT4A,LDOC1,ME1,TUBA4A,TFCP2L1,CAMK2N1,NDRG1,SEMA6D,HOOK1,SCD,PLCB4,PLOD2,VEGFA,CDCP1,GDA,TRIB3,CADPS,PNMA2,TMEM37,RAB11FIP5,IGSF1,ATP2A3,IL6R,MXI1,SORL1,MYO1D,INSIG1,ABHD3,PDX1,TNFRSF11A,ITPR3,PTPN3,PTPRJ,RAB3B,DPYSL2,TRIM2,SLC11A2,RBP4,PAPSS2,SYT7,GREM2,TGFBR3,MLXIPL,RASSF6,RASA4,RORA,SLC39A14
Coexpression Atlas	facebase_RNAseq_e14.5_palate_poster_nasal_Tgfbr2_WT_2500	facebase_RNAseq_e14.5_palate_poster_nasal_Tgfbr2_WT_2500	Gudmap RNAseq	5.76e-07	0.00234	5.21e-06	4.63e-05	82	1638	EPHX2,PCSK5,HLA-DMA,SERPINF1,TMEM176A,MGLL,ATP8B1,LDOC1,ST6GALNAC6,KLF4,F3,TTR,MYORG,CKB,SIAE,MGAT3,CLCN2,FCGRT,SH3RF2,AFP,PCDH19,CCL5,PLAUR,PLOD2,BAIAP2L2,FLNB,TMEM176B,PRXL2B,ANXA4,SEMA4G,COL23A1,SLC6A8,IGF2,DOK4,PLPP3,FRZB,RAB11FIP5,PCP4L1,C1QTNF12,FXYD2,CTSS,TTC39B,ABCC3,PAG1,MYO1D,NAGA,SPOCK2,SLC46A1,TMBIM1,IGSF10,MTMR11,FZD5,SEMA3B,NQO1,CALML4,SLC38A3,NPNT,P4HA2,KCNE3,GPX3,RBP4,NR1H3,B3GNT7…
Coexpression	M45731	HE_LIM_SUN_FETAL_LUNG_C2_MEGAKARYOCYTE	C8: Cell Type Signature	5.8e-07	0.00558	2.03e-05	0.000198	39	694	TSPAN15,EPHX2,HGD,MGLL,PFKP,TUBA4A,CKB,SIAE,PIK3CB,PLAG1,CCL5,TMEM164,PLOD2,MYO18A,SLC39A4,XK,AATK,FAR2,CCDC68,MCTP2,ATP2A3,TTC39B,ABCC3,FAXDC2,IGSF10,TMEM163,CA2,EGLN3,KCNE3,C12orf75,PAPSS2,RGS3,ABLIM1,SLC44A1,INF2,PCSK6,CD151,STOM,LRRFIP2
Coexpression Atlas	gudmap_kidney_P4_CapMesRenVes_Crym_500	kidney_P4_CapMesRenVes_Crym_top-relative-expression-ranked_500	Gudmap Mouse MOE430.2	5.92e-07	0.00241	5.34e-06	4.75e-05	31	398	HLA-DMB,ENPP2,MGAT4A,MGLL,ADORA1,HOOK1,SGPP2,CXCL14,CLDN7,C1QTNF12,PRDM16,MYO6,ANKS4B,BMP2,PTPN3,CA12,NDNF,DPP4,TRIM2,CECR2,LAMC2,MAP7,PAPSS2,TFRC,KIAA1217,TSPAN8,LRP4,EPCAM,RSPO1,CDH4,CDH16
Transcription Factor Binding Site	RGTTAMWNATT_V$HNF1_01	RGTTAMWNATT_V$HNF1_01	TFBS	6.03e-07	0.000607	3.79e-05	0.000284	10	59	TTR,HOXC6,AGT,PLG,APOM,TINAG,HNF1A,SLC17A4,SGK2,CDH16
Coexpression Atlas	PCBC_ratio_DE_vs_SC_cfr-2X-p05	Endoderm Differentiated Cells_vs_Pluripotent Stem Cells-Confounder_removed-fold2.0_adjp0.05	PCBC_AltAnalyze	6.09e-07	0.00248	5.48e-06	4.88e-05	41	615	RGMB,ACHE,F3,MYORG,SEMA6D,PIK3CB,QPCT,PLOD2,USP53,FLNB,SELENOP,CXCL14,APOA1,APOA2,BHLHE40,SLC1A1,COL23A1,SLCO2A1,FRZB,NT5C2,MXI1,TTC39B,CYP27A1,TMEM135,GCNT1,ELOVL2,BMP2,FZD5,KLF5,LPGAT1,B4GALNT3,CA2,RAB17,TFRC,SLC35A3,EVA1B,SLC16A3,INF2,P4HA1,CD151,CDA
GO: Biological Process	GO:0007167	enzyme-linked receptor protein signaling pathway		6.16e-07	0.00415	5.81e-05	0.000546	68	1263	RGMB,CNKSR1,ERBB3,CEACAM5,ENPP1,CEACAM7,ACVRL1,HNF4A,F3,LRG1,MYORG,ADORA1,PIK3CB,AFP,AGT,PLAUR,SMPD3,MUC20,VEGFA,VIL1,VTN,KIF16B,APOA1,PPARA,TDP2,TXNIP,ZFYVE28,IGF2,DOK4,PRKCD,MAPK3,IGSF1,C1QTNF12,PRDM16,SORL1,PAG1,GALNT3,CEACAM6,PBLD,GDNF,CEACAM1,BMP2,PTPN3,BMP8B,PTPRJ,MVP,SLC39A5,NPNT,HNF1A,INHBE,TCF7L2,TMPRSS6,NTRK1,PTPN18,TF,LGALS9,GREM2,TGFBR3,EFNA1,EFNA2,CD7,GUCY2C,PCSK6,PAK1,SLC39A14,ARHGE…
Coexpression Atlas	PCBC_ratio_PulmonMicrovasc_vs_SC_2X-p05	Pulmonary Microvascular_vs_Pluripotent Stem Cells-fold2.0_adjp0.05	PCBC_AltAnalyze	6.19e-07	0.00252	5.56e-06	4.95e-05	88	1803	HEXB,TSPAN15,CARD10,MGLL,ATP8B1,PFKP,ACVRL1,ME1,SQOR,S100A6,MFNG,NDRG1,HOXD1,MTUS1,HPCAL1,FCGRT,PLAUR,PLOD2,FLNB,ANPEP,UBD,PRXL2B,ERO1A,ANXA4,AGPAT2,SH3KBP1,CPT1A,BHLHE40,FAR2,TRIB3,SLC17A9,SLCO2A1,ASL,RAB11FIP5,MAPK3,ARHGAP27,ACSL5,PRSS3,MYO1D,TNFSF10,ERAP1,RAPGEF5,ARHGAP26,IRF1,RETSAT,ITGB4,TMBIM1,NAGS,HAGLR,CEACAM1,GGH,BMP2,SULT1B1,NQO1,LPGAT1,TACC1,MVP,DPP4,OAS3,LAMC2,PAPSS2,PTPN18,RGS3,LGALS…
GO: Biological Process	GO:1904478	regulation of intestinal absorption		6.21e-07	0.00418	5.81e-05	0.000546	7	19	ABCG2,ISX,APOA1,APOA2,APOA4,DGAT1,NR1H3
Coexpression Atlas	Facebase_RNAseq_e9.5_Facial Mesenchyne_1000_K1	FacebaseRNAseq_e9.5_Facial Mesenchyne_top-relative-expression-ranked_1000_k-means-cluster#1	FaceBase_RNAseq	6.21e-07	0.00253	5.57e-06	4.95e-05	16	125	HLA-DMA,TMEM176B,CLDN3,CLDN7,CCDC68,TTC39B,MYO1D,SPOCK2,KLF5,TMEM163,SLC27A2,NPNT,PAPSS2,GREM2,LMO7,EPCAM
Coexpression	M2504	PHONG_TNF_RESPONSE_NOT_VIA_P38	C2:CGP: Chemical and Genetic Perturbations	6.26e-07	0.00602	2.18e-05	0.000213	25	341	MTUS1,PLAUR,PLCB4,RBM47,VIPR1,CDCP1,BHLHE40,IFNGR1,TRIB3,PLPP3,PRKCD,ATP1B1,CXADR,IRF1,GCHFR,FZD5,CA12,P4HA2,TCF7L2,RCAN1,LAMC2,RGS3,SLC25A22,EFNA1,INF2
Coexpression Atlas	Facebase_RNAseq_e10.5_Medial Nasal Eminence_2500_K2	FacebaseRNAseq_e10.5_Medial Nasal Eminence_top-relative-expression-ranked_2500_k-means-cluster#2	FaceBase_RNAseq	6.35e-07	0.00259	5.68e-06	5.05e-05	41	616	ENPP1,ENPP2,MGLL,CYP2S1,HAVCR1,RBM47,CXCL5,ALOX15B,VIPR1,SELENOP,ANXA4,SLC1A1,HAPLN1,LPIN3,ZFYVE28,TMEM45B,MUC4,CTSS,MASP1,NAAA,MYO6,NAGA,GDPD2,ISG20,APOBR,GGH,BMP8B,MTMR11,CHPT1,PTPRJ,VILL,RAB3B,CA12,ADAP1,LGALS4,LGALS9,SLC22A18,C1orf115,EFNA1,RASA4,LRP4
Coexpression Atlas	gudmap_developingGonad_P2_testes_1000_k4	DevelopingGonad_P2_testes_emap-30171_k-means-cluster#4_top-relative-expression-ranked_1000	Gudmap Mouse MOE430.2	6.4e-07	0.00261	5.71e-06	5.08e-05	27	319	SERPINF1,WIPF3,ME1,ADORA1,CLCN2,MTUS1,QPCT,DHRS11,FADS6,CPT1A,COL23A1,TXNIP,LSR,PLPP3,SOD3,ABHD3,GATM,SPOCK2,ELOVL2,ITPKA,RCAN1,MAP7,LGALS9,GREM2,SERPINB1,RORA,SERPINA5
Coexpression	M2806	CAHOY_ASTROCYTIC	C6: Oncogenic Signature	6.45e-07	0.00621	2.23e-05	0.000218	13	100	MYORG,AGT,VEGFA,PPARA,LGI4,HAPLN1,ATP1A1,SLC46A1,ELOVL2,HEPH,LPGAT1,PAPSS2,RSPO1
Coexpression	M40011	BUSSLINGER_GASTRIC_METALLOTHIONEIN_CELLS	C8: Cell Type Signature	6.45e-07	0.00621	2.23e-05	0.000218	13	100	NDRG1,SNHG29,FXYD3,MUC1,ABCC3,IQGAP2,NQO1,CA2,LGALS3,TFF2,PLLP,TSPAN8,TMPRSS2
Coexpression Atlas	gudmap_RNAseq_p2_Glomerlular Endothelial_2500_K1	gudmap_RNAseq_p2_Glomerlular Endothelial_2500_K1	Gudmap RNAseq	6.47e-07	0.00263	5.76e-06	5.12e-05	51	850	PCSK5,PFKP,KLF4,SEMA6D,MTUS1,HPCAL1,PIK3CB,SCD,PRR13,OSBPL9,CCL5,FBXO32,VEGFA,SELENOP,TMEM176B,AGPAT2,VSIG10,CPT1A,IFNGR1,C1orf226,MAPK3,ATP1A1,CTSS,ACSL5,MYO6,ARHGAP26,SRI,GATM,ISG20,GCNT1,MTMR11,CHPT1,CPEB2,WSCD1,DPP4,RCAN1,ARRDC4,SYT7,RGS3,SH3D21,LGALS4,TGFBR3,ABLIM1,INF2,KIAA1217,SCARB1,ENTPD5,ARHGEF2,HSD17B11,ARHGAP45,STOM
Coexpression Atlas	facebase_RNAseq_e8.5_FloorPlate_2500_K2	facebase_RNAseq_e8.5_FloorPlate_2500_K2	Gudmap RNAseq	6.6e-07	0.00269	5.85e-06	5.2e-05	18	157	PLEKHH1,HOOK1,PRELID2,CAMSAP3,LSR,CADPS,CCDC68,ATP1B1,PRSS8,SEMA3B,MARVELD3,SLC27A2,PLLP,LLGL2,LRRC1,ENTPD5,ELF3,GPA33
Coexpression Atlas	gudmap_developingLowerUrinaryTract_P2_bladder stroma (LCM)_1000_k1	DevelopingLowerUrinaryTract_P2_bladder stroma (LCM)_emap-30396_k-means-cluster#1_top-relative-expression-ranked_1000	Gudmap Mouse MOE430.2	6.6e-07	0.00269	5.85e-06	5.2e-05	18	157	GCNT3,MGAT4A,ATP8B1,ME1,POF1B,PLEKHH1,S100A6,FXYD3,ANXA4,TMEM45B,RAB11FIP5,ABCC3,PAQR5,TMBIM1,CFB,LGALS3,TSPAN8,TMPRSS2
Coexpression Atlas	Facebase_RNAseq_e8.5_Paraxial Mesoderm_2500_K1	FacebaseRNAseq_e8.5_Paraxial Mesoderm_top-relative-expression-ranked_2500_k-means-cluster#1	FaceBase_RNAseq	6.61e-07	0.00269	5.85e-06	5.2e-05	34	463	ENPP1,MGLL,CYP2S1,RBM47,CXCL5,ALOX15B,ANXA4,SLC1A1,LPIN3,ZFYVE28,SLCO2A1,PCP4L1,FXYD2,MUC4,CTSS,MASP1,NAAA,ARHGAP26,NAGA,ISG20,APOBR,GGH,BMP8B,MTMR11,CHPT1,PTPRJ,VILL,ADAP1,ATP13A2,LGALS4,LGALS9,C1orf115,EFNA1,RASA4
Coexpression Atlas	gudmap_dev gonad_e12.5_F_SupCellPrec_Sry_1000	dev gonad_e12.5_F_SupCellPrec_Sry_top-relative-expression-ranked_1000	Gudmap Mouse ST 1.0	6.66e-07	0.00271	5.88e-06	5.23e-05	49	803	KLF4,ME1,SIAE,CLCN2,SEMA6D,MTA3,HPCAL1,PRELID2,CGN,OSBPL9,PLAG1,PLCB4,VEGFA,ANPEP,PRXL2B,ANXA4,CAMSAP3,PPARA,CPT1A,SEMA4G,IGF2,PRKCD,ATP1B1,NAAA,ARHGAP26,ABHD3,GATM,GDPD2,BMP2,PTPN3,CHPT1,DIAPH2,DPYSL2,SLC11A2,GRIK3,SH3D21,CRYL1,C1orf115,EFNA1,P2RX4,SLC16A4,LMO7,PCSK6,ARHGAP12,TSPAN8,PAM,CD151,HSD17B11,RSPO1
GO: Biological Process	GO:0030334	regulation of cell migration		6.7e-07	0.00451	6.18e-05	0.000581	68	1266	PCSK5,CEACAM5,ENPP2,SERPINF1,CEACAM7,CARD10,ACVRL1,KLF4,HNF4A,F3,ADORA1,MGAT3,SEMA6D,MTUS1,SH3RF2,PIK3CB,AGT,CCL5,SMPD3,MMP7,CCL20,PLG,ALOX15B,OSGIN1,VEGFA,VIL1,SEMA4B,VTN,EPB41L4B,CAMSAP3,CXCL14,CLDN3,SEMA4G,MST1,IGF2,PLPP3,MAPK3,IL6R,SORL1,CEACAM6,GCNT1,PTAFR,CEACAM1,IGSF10,BMP2,PTPRJ,SEMA3B,DIAPH1,MARVELD3,DPEP1,DPP4,DPYSL2,RAB25,LAMA2,LAMC2,CXCL16,LGALS3,TFF2,LGALS9,TGFBR3,EFNA1,LLGL2,P2RX4,S…
GO: Biological Process	GO:0016192	vesicle-mediated transport		7.01e-07	0.00472	6.38e-05	0.000599	89	1822	CDX2,CEACAM5,SYN3,ACHE,ENPP1,ENPP2,WIPF3,CEACAM7,SNAP47,ADORA1,HAVCR1,HOOK1,AP2A2,FCGRT,PIK3CB,FGB,CCL5,SMPD3,FER1L5,VEGFA,VTN,ANXA4,SH3KBP1,KIF16B,MYO18A,TMPRSS4,APOA1,APOA2,CLSTN1,SLC1A1,SLC9A3,PLPP3,SLC17A9,CADPS,RAB11FIP5,PRKCD,RASEF,MAPK3,ARHGAP27,STX16,IL2RG,SORL1,CIDEB,MASP1,SPIRE2,MYO1D,MYO6,INSIG1,CEACAM6,RILP,PTAFR,STEAP2,APOBR,ITGB2,CFB,CEACAM1,CDC42SE2,PTPRJ,DIAPH1,DMBT1,RAB3B,DPP4,DP…
Transcription Factor Binding Site	M30320	ZNF423_TARGET_GENES	MSigDB	7.06e-07	0.00071	4.18e-05	0.000313	50	1077	HLA-DMA,SERPINF1,ST6GALNAC6,SQOR,CKB,MTA3,MTUS1,SCD,OSBPL9,QPCT,PLS1,OSGIN1,SEMA4B,KIAA1522,MYO18A,BHLHE40,SLC1A1,SLC6A8,RHPN2,TMEM37,RASEF,ATF3,ATP1A1,OCLN,STX16,CXADR,IQGAP2,FAM83E,GCHFR,RILP,TRIM14,ITGB2,RNF43,ITPR3,GGH,CHPT1,CA12,DPYSL2,RGS3,SH3D21,TFRC,TGFBR3,USP2,SLC44A1,TRNT1,LLGL2,P2RX4,SLC16A3,PAM,EPCAM
Coexpression	M5665	GSE6566_STRONG_VS_WEAK_DC_STIMULATED_CD4_TCELL_UP	C7:IMMUNESIGDB: ImmuneSigDB	7.29e-07	0.00701	2.51e-05	0.000245	18	192	HK2,SERPINF1,CYP2S1,PFKP,CKB,PLCB4,RBM47,EPB41L4B,BHLHE40,BRINP2,MYO1D,SLC46A1,ISG20,PTPN3,KLF5,NPNT,ARRDC4,OAS3
GO: Biological Process	GO:0010038	response to metal ion		7.49e-07	0.00504	6.73e-05	0.000632	34	462	AOC1,ENPP1,SERPINF1,SERPINA1,NDRG1,FGB,SMPD3,ABCC2,ALDOB,CP,SLC1A1,ABCC6,TXNIP,MTTP,MAPK3,SOD3,PDX1,GATM,ITPKA,ITPR3,GGH,GIPR,NQO1,DPEP1,TCF7L2,SLC11A2,ATP13A2,SYT7,TF,TNFRSF11B,TFRC,P2RX4,RASA4,PAM
Coexpression Atlas	GSM538248_500	Myeloid Cells, DC.4+.Sp, CD11b CD45 CD4 CD11c CD8a, Spleen, avg-1	Immgen.org, GSE15907	7.57e-07	0.00308	6.67e-06	5.93e-05	30	382	HLA-DMA,TMEM176A,PIK3CB,CCL5,RBM47,FLNB,TMEM176B,ANPEP,FLVCR1,ZFP36,CTSS,IL6R,CYP27A1,PTAFR,PTPN3,PTPRJ,TMEM150B,DPP4,ADAP1,GPR35,CXCL16,PAPSS2,TFRC,SLC44A1,CD7,RASA4,PAK1,CD68,NOSTRIN,STOM
Coexpression	M5658	GSE6269_FLU_VS_STREP_PNEUMO_INF_PBMC_DN	C7:IMMUNESIGDB: ImmuneSigDB	7.65e-07	0.00736	2.63e-05	0.000256	17	173	ACHE,ACVRL1,ALPG,VIPR2,AGPAT2,CLDN3,ABCC6,SLC9A3,IGF2,SORL1,CYP27A1,LPGAT1,SLC38A3,TRIM15,NOL3,HSD17B11,PC
Coexpression Atlas	gudmap_dev gonad_e13.5_F_gudmap_devVascOvary_Flk_1000	dev gonad_e13.5_F_DevVascOvary_Flk_top-relative-expression-ranked_1000	Gudmap Mouse ST 1.0	7.71e-07	0.00314	6.78e-06	6.02e-05	50	831	HEXB,MGLL,GOLM1,ATP8B1,ACVRL1,SQOR,MFNG,SEMA6D,PIK3CB,PLCB4,ABCG2,FLNB,SELENOP,ZFP36,HAPLN1,IFNGR1,IGF2,DOK4,PLPP3,SLCO2A1,ATF3,ARHGAP27,IL2RG,CTSS,MYO6,RAPGEF5,ARHGAP26,GATM,IRF1,GCHFR,CEACAM1,BMP2,SULT1A1,DIAPH2,TACC1,EGLN3,KCNE3,TF,TNFRSF11B,LGALS9,ABLIM1,C1orf115,EFNA1,SCARB1,LRP4,CD68,NOSTRIN,ARHGEF2,TM4SF1,PCDH1
Coexpression Atlas	gudmap_developingLowerUrinaryTract_e13.5_bladder epithelial cells_100	DevelopingLowerUrinaryTract_e13.5_bladder epithelial cells_emap-30875_top-relative-expression-ranked_100	Gudmap Mouse MOE430.2	7.84e-07	0.00319	6.88e-06	6.12e-05	13	84	ATP8B1,LDOC1,TTR,POF1B,HOXD1,FXYD3,TMEM45B,CCDC68,OCLN,CA2,LGALS3,TSPAN8,TMPRSS2
Coexpression	M41157	GARCIA_PINERES_PBMC_HPV_16_L1_VLP_AGE_18_25YO_STIMULATED_VS_UNSTIMULATED_0DY_VACCINATION_INDEPENDENT_DN	C7:VAX: HIPC Vaccine Response	7.85e-07	0.00755	2.69e-05	0.000262	15	136	ABO,SERPINF1,TFCP2L1,CLIC5,SCD,SELENOP,SORL1,ABCC3,CYP27A1,NQO1,SLC26A2,GPX3,LAMC2,PAPSS2,RNASE4
Coexpression Atlas	gudmap_developingLowerUrinaryTract_P1_bladder_J_1000_k3	DevelopingLowerUrinaryTract_P1_bladder_J_emap-30374_k-means-cluster#3_top-relative-expression-ranked_1000	Gudmap Mouse MOE430.2	7.97e-07	0.00324	6.97e-06	6.2e-05	18	159	GCNT3,TLCD4,ATP8B1,ME1,TTR,S100A6,DEGS2,FXYD3,RBM47,FA2H,ANXA4,RAB11FIP5,SDCBP2,PAQR5,ATP10B,GCNT1,TF,TMPRSS2
GO: Molecular Function	GO:0022804	active transmembrane transporter activity		8.09e-07	0.00119	8.53e-05	0.000671	36	488	SLCO2B1,FABP1,ABCG2,ABCC2,SLC39A4,SLC1A1,ABCC6,SLC6A8,SLC9A3,SLC15A1,SLC17A9,SLCO2A1,SLC22A5,SLC45A1,ATP1A1,ATP1B1,ATP2A3,ABCC3,SLC36A1,SLC46A1,SLC36A2,SLC39A5,SLC38A3,SLC26A3,SLC11A2,SLC26A2,SLC17A4,ATP13A2,SLC25A22,SLC22A18,SLC35A3,SLC16A4,SLC16A3,SLC39A14,SLC6A14,CDH17
Coexpression Atlas	PCBC_ratio_PulmonMicrovasc_vs_SC_cfr-2X-p05	Pulmonary Microvascular_vs_Pluripotent Stem Cells-Confounder_removed-fold2.0_adjp0.05	PCBC_AltAnalyze	8.11e-07	0.0033	7.08e-06	6.29e-05	85	1733	HEXB,TSPAN15,CARD10,MGLL,ATP8B1,PFKP,ACVRL1,ME1,SQOR,S100A6,MFNG,NDRG1,HOXD1,MTUS1,HPCAL1,FCGRT,PLAUR,PLOD2,FLNB,ANPEP,UBD,PRXL2B,ERO1A,ANXA4,AGPAT2,CPT1A,BHLHE40,FAR2,TRIB3,SLC17A9,SLCO2A1,ASL,RAB11FIP5,MAPK3,ARHGAP27,ACSL5,PRSS3,MYO1D,TNFSF10,ERAP1,RAPGEF5,ARHGAP26,IRF1,RETSAT,ITGB4,TMBIM1,NAGS,HAGLR,CEACAM1,GGH,BMP2,SULT1B1,NQO1,LPGAT1,TACC1,MVP,DPP4,OAS3,LAMC2,PAPSS2,PTPN18,RGS3,LGALS3,TFF3,P…
Transcription Factor Binding Site	GGGYGTGNY_UNKNOWN	GGGYGTGNY_UNKNOWN	TFBS	8.12e-07	0.000817	4.18e-05	0.000313	31	524	POF1B,NDRG1,FXYD3,PLS1,FLNB,VTN,EPB41L4B,SH3KBP1,XK,CLDN3,CLDN7,CPT1A,LGI4,BHLHE40,GDA,IGSF1,ATP1A1,SPOCK2,CDHR5,GCHFR,ITGB4,NELL2,KLF5,SEMA3B,DPYSL2,LAMC2,RGS3,LGALS3,TFF2,RORA,NOSTRIN
Transcription Factor Binding Site	M40710	HMGB1_TARGET_GENES	MSigDB	8.16e-07	0.000821	4.18e-05	0.000313	64	1535	HGD,HK2,ACHE,ENPP1,WIPF3,MGLL,ATP8B1,PFKP,ST6GALNAC6,PLEKHH1,MELTF,SEMA6D,MTA3,PIK3CB,PLCB4,TMEM164,PLOD2,VEGFA,VIPR1,FLNB,KIAA1522,PRXL2B,ERO1A,MYO18A,PAQR8,APOB,PPARA,TRIB3,PRKCD,CTNNA1,MAPK3,C1QTNF12,ATP2A3,DGAT1,MXI1,RAPGEF5,PAQR5,IRF1,TNFRSF11A,ITGB4,TMBIM1,HAGLR,ITPKA,BMP2,CDC42SE2,PTPRJ,ATP11A,TACC1,NDNF,DPP4,TCF7L2,C12orf75,TPPP,GALNT12,GRIK3,LGALS3,SFXN1,CNNM4,RNF220,P2RX4,ENTPD5,RFLNA,A…
Coexpression Atlas	gudmap_kidney_e10.5_UretericTip_HoxB7_k4_500	kidney_e10.5_UretericTip_HoxB7_k-means-cluster#4_top-relative-expression-ranked_500	Gudmap Mouse MOE430.2	8.17e-07	0.00333	7.12e-06	6.33e-05	11	59	ERBB3,HOOK1,SCD,AK4,PRSS8,PTPN3,CA2,RAB25,GPX3,GLB1L2,TFRC
Coexpression Atlas	gudmap_developingKidney_e11.5_ureteric bud_500_k3	DevelopingKidney_e11.5_ureteric bud_emap-3844_k-means-cluster#3_top-relative-expression-ranked_500	Gudmap Mouse MOE430.2	8.2e-07	0.00334	7.13e-06	6.33e-05	20	193	CNKSR1,PLCXD1,TLCD4,WIPF3,LDOC1,HOXD1,AK4,CLDN3,CDCP1,HAPLN1,PRDM16,RNF43,PTPN3,MARVELD3,WSCD1,RAB25,LAMC2,CLMN,PAK1,PADI2
Coexpression Atlas	GSM538282_500	Myeloid Cells, MF.Lu, CD11chi CD11b- CD103- MHCII- SiglecF+, Lung, avg-3	Immgen.org, GSE15907	8.21e-07	0.00334	7.13e-06	6.33e-05	32	425	HLA-DMA,SLCO2B1,ENPP1,MGLL,KLF4,SQOR,FABP1,FCGRT,PLAUR,ANXA4,BHLHE40,GDA,CIDEC,ATF3,CTSS,NAAA,GALNT3,MYO6,TMBIM1,CFB,TCF7L2,ARRDC4,ATP10A,TF,LGALS3,RNASE4,CLMN,SERPINB1,CD68,LY75,EPCAM,STOM
Transcription Factor Binding Site	V$HNF4_Q6	V$HNF4_Q6	TFBS	8.31e-07	0.000836	4.18e-05	0.000313	18	206	ERBB3,CGN,PLS1,XK,XPNPEP2,FUT2,PTPRH,SEMA3B,HNF1A,TRIM15,GPX2,USH1C,SLC16A4,SUSD2,PAK1,SLC39A14,NOSTRIN,ARHGEF2
Coexpression Atlas	gudmap_developingLowerUrinaryTract_e15.5_Urothelium_1000_k2	DevelopingLowerUrinaryTract_e15.5_Urothelium_emap-28091_k-means-cluster#2_top-relative-expression-ranked_1000	Gudmap Mouse MOE430.2	8.38e-07	0.00341	7.26e-06	6.45e-05	8	28	FOXA3,HNF4A,TTR,AFP,ALDOB,ITIH2,SLC27A2,TFRC
Coexpression	M5311	HOSHIDA_LIVER_CANCER_SUBCLASS_S1	C2:CGP: Chemical and Genetic Perturbations	8.39e-07	0.00807	2.86e-05	0.000278	20	235	HLA-DMA,ME1,TUBA4A,CCL5,PLAUR,ANXA4,IL2RG,CTSS,SRI,IRF1,ITGB2,ITPR3,KLF5,DPYSL2,TSPAN3,TFF3,LGALS9,PAK1,PAM,CD151
Coexpression	MM1051	SWEET_LUNG_CANCER_KRAS_DN	M2:CGP: Chemical and Genetic Perturbations	8.45e-07	0.00813	2.86e-05	0.000278	29	443	ENPP2,CYP2S1,ACVRL1,KLF4,ALDOB,VEGFA,CXCL14,CP,PLPP3,CIDEC,SOD3,PAG1,CYP2B6,MYO6,GBP3,SPOCK2,HEPH,GGH,SULT1A1,CA2,NPNT,DPEP1,GPX3,LAMA2,PAPSS2,TFRC,GREM2,ABLIM1,PAM
Coexpression	M40292	DESCARTES_FETAL_SPLEEN_MESOTHELIAL_CELLS	C8: Cell Type Signature	8.49e-07	0.00817	2.86e-05	0.000278	18	194	F3,NDRG1,SH3RF2,CGN,SCNN1A,SMPD3,BHLHE40,ZFP36,ATF3,CXADR,TNFSF9,SPOCK2,KLF5,NPNT,LGALS3,RSPO3,TM4SF1,RSPO1
Coexpression	M8340	GSE24574_BCL6_LOW_TFH_VS_TCONV_CD4_TCELL_UP	C7:IMMUNESIGDB: ImmuneSigDB	8.49e-07	0.00817	2.86e-05	0.000278	18	194	ACHE,ACVRL1,CKB,HAVCR1,SCD,AGT,ALDOB,PLS1,VTN,CLDN7,MUC1,GJB1,VILL,RNASE4,SLC16A4,LMO7,TMPRSS2,PC
Coexpression	M2697	P53_DN.V1_DN	C6: Oncogenic Signature	8.49e-07	0.00817	2.86e-05	0.000278	18	194	HGD,MGLL,MTUS1,FGB,QPCT,PLCB4,ABCC2,MMP7,FXYD2,TNFSF9,CYP27A1,ELOVL2,CA2,CA12,SLC26A2,SLC16A4,TM4SF4,STOM
GO: Biological Process	GO:0061041	regulation of wound healing		8.5e-07	0.00573	7.5e-05	0.000704	19	175	CEACAM5,CEACAM7,F2,F3,FGB,PLAUR,PLG,SERPINF2,VIL1,VTN,DUOX2,CLDN3,PLPP3,PRKCD,OCLN,CEACAM6,CEACAM1,TSPAN8,ARHGEF2
GO: Biological Process	GO:0050994	regulation of lipid catabolic process		8.57e-07	0.00577	7.5e-05	0.000704	13	84	FABP1,ADORA1,APOA2,APOA4,PPARA,SIRT6,CPT1A,CIDEC,PRKCD,ACSL5,SORL1,HCAR1,SCARB1
GO: Biological Process	GO:0046460	neutral lipid biosynthetic process		8.83e-07	0.00595	7.53e-05	0.000707	11	59	ANG,MOGAT2,AGPAT2,LPIN3,MOGAT3,DGAT1,ACSL5,LPGAT1,TCF7L2,NR1H3,SCARB1
GO: Biological Process	GO:0046463	acylglycerol biosynthetic process		8.83e-07	0.00595	7.53e-05	0.000707	11	59	ANG,MOGAT2,AGPAT2,LPIN3,MOGAT3,DGAT1,ACSL5,LPGAT1,TCF7L2,NR1H3,SCARB1
GO: Molecular Function	GO:1901682	sulfur compound transmembrane transporter activity		8.89e-07	0.00131	8.75e-05	0.000689	11	57	ABCG2,ABCC2,SLC1A1,ABCC6,SLC3A1,ABCC3,SLC36A1,SLC26A3,SLC26A2,SLC19A3,SLC44A4
Coexpression Atlas	GSM538285_500	NK cells, NK.49CI+.Sp, NK1.1+ CD3- Ly49C/I+, Spleen, avg-3	Immgen.org, GSE15907	8.92e-07	0.00363	7.71e-06	6.85e-05	30	385	ENPP1,GOLM1,PFKP,S100A6,CAMK2N1,PIK3CB,CCL5,ABCG2,PLOD2,AOAH,BHLHE40,IFNGR1,ATP1B1,MCTP2,TTC39B,MYO6,ARHGAP26,ACSS2,APOBR,ITGB2,RNF43,FZD5,TMEM163,CA2,NDNF,B3GNT7,CD7,PAM,PADI2,MXD1
Coexpression Atlas	Facebase_RNAseq_e9.5_Maxillary Arch_2500_K3	FacebaseRNAseq_e9.5_Maxillary Arch_top-relative-expression-ranked_2500_k-means-cluster#3	FaceBase_RNAseq	9e-07	0.00366	7.76e-06	6.9e-05	26	305	HLA-DMA,MGAT4A,MTUS1,CGN,PLS1,LRRC75A,TMEM176B,CDCP1,CLSTN1,CCDC68,TTC39B,PRSS8,MYO1D,SPOCK2,BMP2,KLF5,TMEM163,NPNT,RAB25,MAP7,PAPSS2,GREM2,SLC44A1,LMO7,ENTPD5,EPCAM
Coexpression	M11410	LUCAS_HNF4A_TARGETS_UP	C2:CGP: Chemical and Genetic Perturbations	9.05e-07	0.00871	3.03e-05	0.000296	10	58	ERBB3,HNF4A,VIL1,SELENOP,PRKCSH,CIDEB,COBL,CALML4,KIF13B,C1orf115
Coexpression Atlas	gudmap_developingGonad_P2_epididymis_1000_k2	DevelopingGonad_P2_epididymis_emap-30199_k-means-cluster#2_top-relative-expression-ranked_1000	Gudmap Mouse MOE430.2	9.24e-07	0.00376	7.95e-06	7.07e-05	22	230	PCSK5,ENPP1,CHDH,MGLL,TUBA4A,HOXC6,FCGRT,FBXO32,CP,CLDN3,MYO6,KIF12,GGT1,TINAG,MARVELD3,NPNT,DPEP1,DPP4,SLC26A3,TRIM2,PAPSS2,CDH16
Coexpression	M2853	STK33_DN	C6: Oncogenic Signature	9.33e-07	0.00897	3.12e-05	0.000304	22	280	MGAT4A,PIK3CB,SCD,CCL5,PLS1,ANPEP,DHRS11,ASL,PNMA2,TNFSF10,CEACAM6,CHPT1,KLF5,C12orf75,GALNT12,ORM1,HHLA2,ABLIM1,C1orf115,ELMO3,CDA,PADI2
GO: Biological Process	GO:0048732	gland development		9.47e-07	0.00638	7.88e-05	0.00074	46	736	CDX1,CDX2,CEACAM5,HK2,SERPINF1,CEACAM7,FOXA3,HNF4A,TFCP2L1,NDRG1,CLCN2,SCD,HPN,HRH2,PLAG1,PLAUR,ALOX15B,VEGFA,DUOXA2,VTN,FA2H,DUOX2,APOA1,CPT1A,MST1,LSR,IGF2,ASL,FRZB,PRKCSH,MAPK3,PDX1,CEACAM6,TNFRSF11A,CEACAM1,BMP2,PTPN3,FZD5,COBL,HNF1A,TCF7L2,RBP4,TGFBR3,PAM,ELF3,EPCAM
GO: Biological Process	GO:0010669	epithelial structure maintenance		9.48e-07	0.00638	7.88e-05	0.00074	10	48	MUC13,LSR,SLC22A5,MUC4,CXADR,PBLD,TCF7L2,RBP4,TFF2,TFF3
Coexpression	M7396	SWEET_LUNG_CANCER_KRAS_DN	C2:CGP: Chemical and Genetic Perturbations	9.56e-07	0.00919	3.18e-05	0.00031	28	421	ENPP2,CYP2S1,ACVRL1,KLF4,ALDOB,VEGFA,CXCL14,CP,PLPP3,CIDEC,SOD3,PAG1,CYP2B6,MYO6,SPOCK2,HEPH,GGH,SULT1A1,CA2,NPNT,DPEP1,GPX3,LAMA2,PAPSS2,TFRC,GREM2,ABLIM1,PAM
Coexpression Atlas	PCBC_SC_CD34+_1000	Progenitor-Cell-Biology-Consortium_StemCell_CD34+_top-relative-expression-ranked_1000	PCBC	9.61e-07	0.00391	8.25e-06	7.33e-05	56	984	SYN3,RIMKLA,WIPF3,B3GALT5,CYP2S1,ZBED10P,FOXA3,TFCP2L1,AFP,CGN,SCNN1A,UGT8,RBM47,CXCL5,VIL1,VIPR1,VIPR2,EPB41L4B,FA2H,FLVCR1,CLDN3,CLDN7,LSR,C1orf226,SLC15A1,IGSF1,OCLN,MUC3A,TJP3,CYP2B6,PRSS8,FAM83E,GDPD2,TNFRSF11A,NELL2,NR1I2,TMEM92,FZD5,COBL,MARVELD3,B4GALNT3,SLC27A2,INHBE,RAB25,RAB17,CECR2,SLC19A3,B3GNT7,MAP7,USH1C,NSUN7,HHLA2,MLXIPL,LLGL2,TMPRSS2,EPCAM
Coexpression	MM1048	ICHIBA_GRAFT_VERSUS_HOST_DISEASE_35D_UP	M2:CGP: Chemical and Genetic Perturbations	9.74e-07	0.00937	3.23e-05	0.000315	17	176	HLA-DMA,HLA-DMB,LRG1,PLAC8,S100A6,SCD,CCL5,UBD,CTSS,GBP3,ITGB2,GPX3,LGALS3,TFF3,ORM1,CD7,CD68
GO: Molecular Function	GO:0042803	protein homodimerization activity		9.77e-07	0.00144	9.01e-05	0.000709	51	824	EPHX2,CEACAM5,AOC1,ACHE,ENPP1,MGAT4A,CEACAM7,MGLL,HNF4A,DSCAML1,S100A6,HOOK1,NPC1L1,CCL5,ABCG2,SLC51A,SERPINF2,ALPI,ALPG,VEGFA,VIL1,ANG,APOA1,APOA2,APOA4,MUC13,SIRT6,BHLHE40,ATF3,SDCBP2,IL6R,MASP1,NAGA,CEACAM6,GBP3,GDNF,CEACAM1,CREB3L3,DPP4,HNF1A,NTRK1,TPPP,PNPO,TFRC,CRYL1,MLXIPL,TRNT1,LRP4,CDA,PADI2,STOM
Coexpression	M2445	PLASARI_TGFB1_TARGETS_10HR_UP	C2:CGP: Chemical and Genetic Perturbations	9.86e-07	0.00948	3.26e-05	0.000318	18	196	HK2,ENPP1,CARD10,MGLL,PLAUR,FBXO32,CCL20,VEGFA,FLNB,CXCL14,BHLHE40,LPIN3,GALNT3,MYO1D,GATM,PAPSS2,TNFRSF11B,GREM2
Coexpression Atlas	PCBC_ratio_EB_vs_SC_cfr-2X-p05	Embryoid Body Cells_vs_Pluripotent Stem Cells-Confounder_removed-fold2.0_adjp0.05	PCBC_AltAnalyze	9.91e-07	0.00403	8.49e-06	7.55e-05	87	1796	TSPAN15,EPHX2,RGMB,ENPP2,SERPINF1,F3,S100A6,SIAE,SERPINA1,HOXC6,MGAT3,CAMK2N1,NDRG1,SEMA6D,FCGRT,AGT,FGB,QPCT,PLAUR,PLOD2,VEGFA,SELENOP,VTN,CXCL14,APOA1,APOA2,APOB,BHLHE40,ZFP36,SEMA4G,HAPLN1,COL23A1,TXNIP,MST1,IGF2,DOK4,PLPP3,FRZB,PNMA2,RAB11FIP5,ATF3,ATP1B1,DGAT1,MXI1,ERAP1,CYP27A1,FAXDC2,SLC46A1,APOM,GGH,LINC02381,KLF5,SEMA3B,LPGAT1,MVP,CA2,NPNT,NDNF,DPP4,P4HA2,RCAN1,ARRDC4,C12orf75,LAMA2,LAMC…
GO: Biological Process	GO:0030195	negative regulation of blood coagulation		9.99e-07	0.00673	8.15e-05	0.000766	12	72	CEACAM5,CEACAM7,F2,FGB,PLAUR,PLG,SERPINF2,VTN,PRKCD,CEACAM6,CEACAM1,TSPAN8
Coexpression	M45798	HE_LIM_SUN_FETAL_LUNG_C7_PROLIFERATING_SCHWANN_CELL	C8: Cell Type Signature	1e-06	0.00965	3.3e-05	0.000322	51	1053	TSPAN15,ENPP2,PLCXD1,TLCD4,MELTF,PRELID2,UGT8,PLAUR,FXYD3,TMEM176B,AGPAT2,SH3KBP1,APOA1,PPARA,AATK,BRI3BP,FRZB,PRDM16,CIDEB,IQGAP2,ERAP1,ARHGAP26,CYP27A1,NAGA,TMEM135,ABHD3,GCNT1,RETSAT,ITGB4,HEPH,ITPR3,BMP8B,COBL,B4GALNT3,CA2,ESPN,P4HA2,LAMA2,CXCL16,NSUN7,LGALS3,PNPO,TGFBR3,RNASE4,LACTB2,LMO7,CLMN,SH3D19,RFLNA,PC,SERPINA5
GO: Biological Process	GO:0010565	regulation of cellular ketone metabolic process		1.01e-06	0.00677	8.15e-05	0.000766	20	194	CEACAM5,CEACAM7,HNF4A,FABP1,CLCN2,AGT,APOA4,PPARA,CPT1A,TRIB3,DGAT1,ACSL5,INSIG1,CEACAM6,CEACAM1,BMP2,LPGAT1,NR1H3,MLXIPL,MALRD1
Coexpression	M40009	BUSSLINGER_GASTRIC_PPP1R1B_POSITIVE_CELLS	C8: Cell Type Signature	1.02e-06	0.00981	3.35e-05	0.000326	14	121	GOLM1,RPS24,SNHG29,ATF3,ABCC3,GATM,EPS8L3,KCNE3,GPX2,LGALS3,TSPAN8,TMPRSS2,ELF3,EPCAM
Coexpression	MM3728	TABULA_MURIS_SENIS_KIDNEY_KIDNEY_LOOP_OF_HENLE_THICK_ASCENDING_LIMB_EPITHELIAL_CELL_AGEING	M8: Cell Type Signature	1.02e-06	0.00985	3.35e-05	0.000326	20	238	TMEM176A,ABHD17C,TFCP2L1,NDRG1,AP2A2,HPCAL1,PRR13,SCNN1A,RBM47,TMEM176B,FLVCR1,ACSL5,GGT1,GPX3,CXCL16,LGALS3,ABLIM1,C1orf115,EVA1B,TMPRSS2
Coexpression	MM3714	TABULA_MURIS_SENIS_HEART_AND_AORTA_FIBROBLAST_OF_CARDIAC_TISSUE_AGEING	M8: Cell Type Signature	1.03e-06	0.00987	3.35e-05	0.000326	24	327	HK2,ENPP2,TMEM176A,MGLL,RPS24,KLF4,S100A6,SCD,PRR13,SELENOP,TMEM176B,CP,BHLHE40,TXNIP,GDA,SOD3,DPEP1,GPX3,CXCL16,TF,RNASE4,PCSK6,PAM,RSPO1
Coexpression Atlas	gudmap_kidney_adult_RenCorpuscGlomer_k1_1000	kidney_adult_RenCorpuscGlomer_k-means-cluster#1_top-relative-expression-ranked_1000	Gudmap Mouse MOE430.2	1.04e-06	0.00421	8.83e-06	7.85e-05	13	86	TMEM176A,SQOR,SERPINA1,QPCT,ALDOB,SELENOP,CHPT1,CALML4,SLC27A2,TCN2,GPX3,GLB1L2,LACTB2
Coexpression Atlas	gudmap_kidney_adult_RenCorpuscGlomer_100	kidney_adult_RenCorpuscGlomer_top-relative-expression-ranked_100	Gudmap Mouse MOE430.2	1.04e-06	0.00421	8.83e-06	7.85e-05	13	86	MGLL,ATP8B1,CLIC5,CP,SLCO2A1,IL2RG,MYO1D,RAB3B,NPNT,DPP4,TSPAN8,NOSTRIN,TM4SF1
GO: Biological Process	GO:0032532	regulation of microvillus length		1.05e-06	0.00709	8.44e-05	0.000793	5	8	PLS1,VIL1,CDHR2,CDHR5,USH1C
Coexpression	MM1320	PLASARI_TGFB1_TARGETS_10HR_UP	M2:CGP: Chemical and Genetic Perturbations	1.06e-06	0.0102	3.45e-05	0.000336	18	197	HK2,ENPP1,CARD10,MGLL,PLAUR,FBXO32,CCL20,VEGFA,FLNB,CXCL14,BHLHE40,LPIN3,GALNT3,MYO1D,GATM,PAPSS2,TNFRSF11B,GREM2
Coexpression	M45723	HE_LIM_SUN_FETAL_LUNG_C2_DC1_CELL	C8: Cell Type Signature	1.08e-06	0.0104	3.51e-05	0.000342	24	328	TSPAN15,ENPP1,CYP2S1,CKB,PRELID2,SH3RF2,PIK3CB,QPCT,SERPINF2,FLNB,ANPEP,KIF16B,PAQR8,FAR2,C15orf48,ATP2A3,ACSL5,ISG20,ACSS2,DPP4,EGLN3,B3GNT7,INF2,LY75
Coexpression Atlas	gudmap_developingLowerUrinaryTract_e14.5_ Genital tubercle_1000_k4	DevelopingLowerUrinaryTract_e14.5_ Genital tubercle_emap-6706_k-means-cluster#4_top-relative-expression-ranked_1000	Gudmap Mouse MOE430.2	1.08e-06	0.00439	9.19e-06	8.17e-05	10	49	TTR,FABP1,SERPINA1,AFP,FGB,PLG,ALDOB,APOA1,ITIH2,TF
Transcription Factor Binding Site	V$HNF4_DR1_Q3	V$HNF4_DR1_Q3	TFBS	1.1e-06	0.00111	5.27e-05	0.000394	18	210	ERBB3,CDX1,FOXA3,TTR,FABP1,CLCN2,LGI4,PRKCD,PRKCSH,ATP1B1,PRDM16,GDNF,SEMA3B,SLC39A5,TCN2,NR1H3,USH1C,GUCY2C
Coexpression	MM3788	TABULA_MURIS_SENIS_MAMMARY_GLAND_LUMINAL_EPITHELIAL_CELL_OF_MAMMARY_GLAND_AGEING	M8: Cell Type Signature	1.12e-06	0.0108	3.61e-05	0.000352	25	352	AOC1,TMEM176A,KLF4,LRG1,CAMK2N1,CCL5,SELENOP,TMEM176B,ANPEP,CXCL14,BHLHE40,ZFP36,ATF3,MAPK3,ATP1A1,ATP1B1,KLF5,TCF7L2,GPX3,TF,LGALS3,USP2,TSPAN8,PAM,ELF3
Coexpression Atlas	GSM854297_500	Plasmacytoid, DC.pDC.8+.MLN, B220-FITC CD45-APC CD11c-eFluor780 GR1-PE CD8-eFlu, Lymph Node, avg-2	Immgen.org, GSE15907	1.12e-06	0.00454	9.48e-06	8.43e-05	31	410	ERBB3,HLA-DMA,CHDH,PLAC8,HAVCR1,PLAUR,RBM47,SEMA4B,CORO2A,PRKCD,ATP1B1,MCTP2,CTSS,INSIG1,CYP27A1,PAQR5,IRF7,PTAFR,CEACAM1,PTPRJ,LPGAT1,TMEM163,ARRDC4,GPR35,ATP13A2,TFRC,SLC44A1,CD7,CD68,SLC39A14,PADI2
Coexpression	M19618	ICHIBA_GRAFT_VERSUS_HOST_DISEASE_35D_UP	C2:CGP: Chemical and Genetic Perturbations	1.14e-06	0.011	3.66e-05	0.000357	15	140	HLA-DMA,HLA-DMB,LRG1,PLAC8,S100A6,SCD,CCL5,UBD,CTSS,ITGB2,GPX3,LGALS3,TFF3,CD7,CD68
Coexpression	M4606	GSE24634_TREG_VS_TCONV_POST_DAY7_IL4_CONVERSION_DN	C7:IMMUNESIGDB: ImmuneSigDB	1.14e-06	0.011	3.66e-05	0.000357	18	198	HEXB,MGLL,FCGRT,SCD,QPCT,PLAUR,RBM47,TMEM176B,IFNGR1,ATP1B1,CTSS,NELL2,CA2,SLC11A2,GALNT12,LGALS3,PLLP,CD68
GO: Biological Process	GO:0016042	lipid catabolic process		1.16e-06	0.00784	9.09e-05	0.000854	30	387	HEXB,ENPP2,MGLL,FABP1,ADORA1,PLCB4,SMPD3,AOAH,APOA2,APOA4,APOB,PPARA,SIRT6,CPT1A,LPIN3,CIDEC,PRKCD,ACSL5,SORL1,NAAA,CYP3A5,CYP27A1,NAGA,HCAR1,ABHD3,SLC27A2,DPEP1,SRD5A3,SCARB1,HSD17B11
GO: Biological Process	GO:1900047	negative regulation of hemostasis		1.16e-06	0.00784	9.09e-05	0.000854	12	73	CEACAM5,CEACAM7,F2,FGB,PLAUR,PLG,SERPINF2,VTN,PRKCD,CEACAM6,CEACAM1,TSPAN8
GO: Biological Process	GO:0015748	organophosphate ester transport		1.17e-06	0.00791	9.09e-05	0.000854	18	162	ATP8B1,FABP1,PRELID2,GLTPD2,APOA1,APOA2,APOA4,ABCC6,SLC17A9,MTTP,PRKCD,ANO9,ATP10B,GJB1,ATP11A,SLC44A4,ATP10A,SCARB1
Coexpression Atlas	GSM538291_500	NK cells, NK.b2m-.Sp, NK1.1+ TCRb-, Spleen, avg-3	Immgen.org, GSE15907	1.17e-06	0.00474	9.88e-06	8.78e-05	30	390	ENPP1,GOLM1,PFKP,CAMK2N1,PIK3CB,CCL5,ABCG2,PLOD2,AOAH,AGPAT2,CPT1A,BHLHE40,IFNGR1,ATP1B1,MCTP2,ATP2A3,TTC39B,MYO6,ARHGAP26,ACSS2,ITGB2,RNF43,FZD5,TMEM163,CA2,NDNF,CD7,PAM,PADI2,MXD1
GO: Molecular Function	GO:0015295	solute:proton symporter activity		1.18e-06	0.00175	0.000103	0.000808	8	28	SLC15A1,SLC45A1,SLC36A1,SLC46A1,SLC36A2,SLC11A2,SLC25A22,SLC16A3
Coexpression Atlas	GSM538271_500	Myeloid Cells, DC.IIhilang+103-11b+.SLN, MHCIIhi CD11c+ Langerin+ CD103- CD11b+, Lymph Node, avg-3	Immgen.org, GSE15907	1.18e-06	0.00478	9.94e-06	8.84e-05	31	411	TMEM176A,NDRG1,SEMA6D,CCL5,TMEM176B,ANXA4,VSIG10,ATF3,CTNNA1,CTSS,RAPGEF5,CYP27A1,IRF1,TNFRSF11A,GCNT1,CFB,ATP11A,MVP,NDNF,CXCL16,PAPSS2,TSPAN3,EFNA2,RASA4,PAK1,SERPINB1,PAM,NOSTRIN,LY75,EPCAM,MXD1
Coexpression Atlas	gudmap_dev gonad_e12.5_M_SertoliCell_Sox9_k3_500	dev gonad_e12.5_M_SertoliCell_Sox9_k-means-cluster#3_top-relative-expression-ranked_500	Gudmap Mouse ST 1.0	1.19e-06	0.00485	1.01e-05	8.94e-05	17	147	TSPAN15,HK2,ME1,ADORA1,PLOD2,VSIG10,SLC6A8,CADPS,MASP1,GATM,ACSS2,GDNF,TACC1,RCAN1,GREM2,ENTPD5,PADI2
GO: Biological Process	GO:0030033	microvillus assembly		1.2e-06	0.00807	9.17e-05	0.000862	8	29	ATP8B1,HNF4A,PLS1,VIL1,MYO1A,KLF5,ESPN,PAM
Coexpression	M6386	CREIGHTON_ENDOCRINE_THERAPY_RESISTANCE_4	C2:CGP: Chemical and Genetic Perturbations	1.21e-06	0.0116	3.85e-05	0.000376	23	307	ADORA1,HPCAL1,AK4,TMEM164,FLNB,BHLHE40,C1orf226,SLC22A5,IGSF1,SRI,ELOVL2,SLC27A2,CA12,P4HA2,TCN1,SLC26A2,C12orf75,RNF183,GRIK3,PAPSS2,SLC25A22,RASA4,SERPINA5
Coexpression	M5892	HALLMARK_CHOLESTEROL_HOMEOSTASIS	H: Hallmark	1.21e-06	0.0116	3.85e-05	0.000376	11	74	SCD,PLAUR,HSD17B7,TRIB3,ATF3,ACSS2,SEMA3B,CPEB2,CXCL16,LGALS3,GUSB
Coexpression	M7951	GSE25123_WT_VS_PPARG_KO_MACROPHAGE_UP	C7:IMMUNESIGDB: ImmuneSigDB	1.23e-06	0.0118	3.85e-05	0.000376	18	199	HK2,QPCT,CCL20,VEGFA,SGPP2,PLPP3,C15orf48,TNFSF9,INSIG1,CFB,PTPRJ,TCF7L2,SLC11A2,RCAN1,SH3D21,ORM1,ARHGEF2,MXD1
Coexpression	M6481	GSE4748_CTRL_VS_LPS_STIM_DC_3H_DN	C7:IMMUNESIGDB: ImmuneSigDB	1.23e-06	0.0118	3.85e-05	0.000376	18	199	TLCD4,ME1,AGT,SELENOP,UBD,PPARA,TXNIP,ATF3,NAAA,RAB3B,SLC26A3,TCN2,ARRDC4,RBP4,LACTB2,SCARB1,CD68,PC
Coexpression	M5427	GSE3982_MAST_CELL_VS_DC_DN	C7:IMMUNESIGDB: ImmuneSigDB	1.23e-06	0.0118	3.85e-05	0.000376	18	199	HLA-DMA,HLA-DMB,MEP1A,HPCAL1,ANPEP,FA2H,ATF3,TRIM14,DIAPH2,CA2,GALNT12,AHCYL2,C1orf115,INF2,GUSB,SCARB1,EPCAM,LRRFIP2
Coexpression	M5687	GSE7460_CD8_TCELL_VS_CD4_TCELL_ACT_UP	C7:IMMUNESIGDB: ImmuneSigDB	1.23e-06	0.0118	3.85e-05	0.000376	18	199	PLAC8,S100A6,CAMK2N1,CLIC5,SH3RF2,CCL5,PLAUR,IFNGR1,MCTP2,DGAT1,TNFSF10,ARHGAP26,IRF1,GGH,NDNF,RGS3,LGALS3,SERPINA5
Coexpression	M4331	GSE20366_TREG_VS_NAIVE_CD4_TCELL_HOMEOSTATIC_CONVERSION_DN	C7:IMMUNESIGDB: ImmuneSigDB	1.23e-06	0.0118	3.85e-05	0.000376	18	199	ENPP2,GOLM1,SEMA6D,HPCAL1,PLCB4,VIPR1,FLVCR1,SLC15A1,RAB11FIP5,GCNT1,RNF43,GGT1,RCAN1,RGS3,LGALS3,TGFBR3,RNF220,HSD17B11
Coexpression Atlas	GSM605843_500	Plasmacytoid, DC.pDC.8-.Sp, GR1-PE CD11c-eFluor750 CD8-eFluor480 CD45-APC B220, Spleen, avg-3	Immgen.org, GSE15907	1.24e-06	0.00503	1.04e-05	9.26e-05	31	412	ERBB3,HLA-DMA,CHDH,PLAC8,HAVCR1,PLAUR,RBM47,PLOD2,SEMA4B,CORO2A,PRKCD,ATP1B1,MCTP2,CTSS,INSIG1,CYP27A1,PAQR5,IRF7,PTAFR,CEACAM1,PTPRJ,TMEM163,TCF7L2,GPR35,ATP13A2,TFRC,SLC44A1,CD7,CD68,SLC39A14,PADI2
Coexpression	M13788	MCBRYAN_PUBERTAL_BREAST_5_6WK_UP	C2:CGP: Chemical and Genetic Perturbations	1.25e-06	0.012	3.89e-05	0.000379	14	123	ERBB3,TLCD4,NDRG1,FXYD3,ANPEP,CLDN7,TMEM45B,OCLN,ATP1B1,TJP3,CEACAM1,KLF5,SFXN1,PAM
Coexpression Atlas	gudmap_developingKidney_e14.5 whole kidney - wildtype_200_k5	DevelopingKidney_e14.5 whole kidney - wildtype_emap-6674_k-means-cluster#5_top-relative-expression-ranked_200	Gudmap Mouse MOE430.2	1.25e-06	0.00508	1.05e-05	9.33e-05	9	39	HNF4A,MEP1A,VIL1,UNC5CL,CLRN3,NPNT,DPP4,ACE2,LACTB2
GO: Biological Process	GO:0005975	carbohydrate metabolic process		1.27e-06	0.00856	9.62e-05	0.000903	42	651	HEXB,HK2,ABO,GCNT3,ENPP1,B3GALT5,PFKP,ST6GALNAC6,HNF4A,ME1,FAM3D,MYORG,SIAE,SMPD3,ALDOB,MOGAT2,HKDC1,PPARA,SIRT6,CPT1A,SLC3A1,MST1,IGF2,ATF3,FUT2,C1QTNF12,MOGAT3,GALNT3,NAGA,PDX1,PTAFR,PPP1R3G,TCF7L2,STBD1,RBP4,GLB1L2,TFF3,MLXIPL,GUSB,RORA,SLC39A14,PC
Coexpression	M46418	MA_RAT_AGING_UP	C2:CGP: Chemical and Genetic Perturbations	1.27e-06	0.0122	3.91e-05	0.000382	13	106	HK2,TMEM176A,RPS24,LRG1,PLAC8,UBD,TXNIP,GDA,C15orf48,NQO1,TF,LGALS3,SERPINB1
Coexpression Atlas	gudmap_developingKidney_e15.5_stage III -IV renal corpusc_200_k3	DevelopingKidney_e15.5_stage III -IV renal corpusc_emap-27945_k-means-cluster#3_top-relative-expression-ranked_200	Gudmap Mouse MOE430.2	1.29e-06	0.00526	1.08e-05	9.61e-05	7	21	ALDOB,FXYD2,GGT1,DPP4,AMN,PRR15,CDH16
Coexpression Atlas	gudmap_kidney_adult_RenMedVasc_Tie2_k1_500	kidney_adult_RenMedVasc_Tie2_k-means-cluster#1_top-relative-expression-ranked_500	Gudmap Mouse MOE430.2	1.29e-06	0.00526	1.08e-05	9.61e-05	7	21	SQOR,NDRG1,ACSL5,CFB,CALML4,CA2,TCN2
Coexpression	M4612	GSE24634_TREG_VS_TCONV_POST_DAY10_IL4_CONVERSION_DN	C7:IMMUNESIGDB: ImmuneSigDB	1.32e-06	0.0127	3.91e-05	0.000382	18	200	HLA-DMB,ENPP2,FCGRT,SCD,RBM47,TMEM176B,ANPEP,PLPP3,CYP27A1,NAGA,ITGB2,CA2,TCN2,GALNT12,NR1H3,PAPSS2,TSPAN3,STOM
Coexpression	M4811	GSE27786_BCELL_VS_ERYTHROBLAST_DN	C7:IMMUNESIGDB: ImmuneSigDB	1.32e-06	0.0127	3.91e-05	0.000382	18	200	TMEM132C,HOXC6,VTN,CXCL14,XK,PNMA2,FUT2,FXYD2,IRF7,TMEM92,SULT1A1,ESPN,SLC26A3,ARRDC4,TPPP,TFF3,PNPO,PCSK6
Coexpression	M9593	GSE42021_CD24HI_VS_CD24INT_TCONV_THYMUS_DN	C7:IMMUNESIGDB: ImmuneSigDB	1.32e-06	0.0127	3.91e-05	0.000382	18	200	GCNT3,HRH2,AK4,CXCL5,CADPS,CCDC68,ATF3,CTSS,INSIG1,IRF1,ISG20,PTAFR,CFB,CEACAM1,EGLN3,ATP10A,SLC25A22,SERPINA5
Coexpression	M8267	GSE21063_CTRL_VS_ANTI_IGM_STIM_BCELL_16H_DN	C7:IMMUNESIGDB: ImmuneSigDB	1.32e-06	0.0127	3.91e-05	0.000382	18	200	CKB,HPCAL1,SELENOP,ANPEP,TXNIP,MST1,TMEM45B,UNC5CL,SORL1,MYO7B,COBL,LGALS3,SLC25A22,RSPO3,ORM1,CCDC183,HSD17B11,CDH16
Coexpression	M8222	GSE22443_NAIVE_VS_ACT_AND_IL2_TREATED_CD8_TCELL_UP	C7:IMMUNESIGDB: ImmuneSigDB	1.32e-06	0.0127	3.91e-05	0.000382	18	200	KLF4,FAM3D,AGT,PLG,SLC51A,APOA4,CIDEC,CIDEB,SRI,CALML4,DMBT1,TFF3,GREM2,SLC44A1,EFNA1,GUCY2C,TMPRSS2,ELF3
Coexpression	M4962	GSE29618_BCELL_VS_MDC_DAY7_FLU_VACCINE_DN	C7:IMMUNESIGDB: ImmuneSigDB	1.32e-06	0.0127	3.91e-05	0.000382	18	200	HEXB,KLF4,NDRG1,FCGRT,SCD,AOAH,BHLHE40,ATF3,ATP1B1,IL6R,CIDEB,NAGA,APOBR,DPYSL2,RCAN1,LGALS9,PAK1,PADI2
Coexpression	M9757	GSE43863_TH1_VS_LY6C_INT_CXCR5POS_MEMORY_CD4_TCELL_DN	C7:IMMUNESIGDB: ImmuneSigDB	1.32e-06	0.0127	3.91e-05	0.000382	18	200	CKB,FCGRT,HRH2,ALDOB,SELENOP,ANPEP,PLPP3,SLC17A9,PPP1R3G,ANKS4B,GJB1,NR1I2,RAB25,GPR35,B3GNT7,TF,CD68,EPCAM
Coexpression	M5043	GSE30962_PRIMARY_VS_SECONDARY_ACUTE_LCMV_INF_CD8_TCELL_DN	C7:IMMUNESIGDB: ImmuneSigDB	1.32e-06	0.0127	3.91e-05	0.000382	18	200	ABO,SYN3,ENPP1,GOLM1,CAMK2N1,PRR13,CCL5,RBM47,SELENOP,CORO2A,CP,TXNIP,GGH,PTPRJ,KIF13B,RCAN1,SERPINB1,RORA
Coexpression	M5074	GSE32423_MEMORY_VS_NAIVE_CD8_TCELL_IL7_UP	C7:IMMUNESIGDB: ImmuneSigDB	1.32e-06	0.0127	3.91e-05	0.000382	18	200	ATP8B1,MYORG,TBC1D32,CAMK2N1,PCDH19,OSBPL9,HRH2,USP53,VIPR1,DHRS11,UNC5CL,TMEM37,RNF39,APOM,ATP11A,KIF13B,DPP4,VWA7
Coexpression	M6256	GSE8835_CD4_VS_CD8_TCELL_CLL_PATIENT_UP	C7:IMMUNESIGDB: ImmuneSigDB	1.32e-06	0.0127	3.91e-05	0.000382	18	200	HAVCR1,OSBPL9,CCL5,FADS6,CTNNA1,MCTP2,TTC39B,NAAA,TNFSF10,IRF7,ISG20,CFB,DIAPH2,OAS3,ATP10A,LGALS3,TRNT1,SUSD2
Coexpression	M6274	GSE2585_CTEC_VS_MTEC_THYMUS_DN	C7:IMMUNESIGDB: ImmuneSigDB	1.32e-06	0.0127	3.91e-05	0.000382	18	200	F3,FABP1,CAMK2N1,AK4,VEGFA,USP53,MUC1,HCAR1,BCKDHB,CFB,TMEM70,CA2,CA12,EGLN3,ARRDC4,GPR35,SUSD2,PRR15
Coexpression	M5939	HALLMARK_P53_PATHWAY	H: Hallmark	1.32e-06	0.0127	3.91e-05	0.000382	18	200	HINT1,KLF4,NDRG1,ALOX15B,OSGIN1,TXNIP,TRIB3,ATF3,TNFSF9,RETSAT,ITGB4,BMP2,KIF13B,TCN2,GPX2,TM4SF1,MXD1,STOM
Coexpression	M2933	GSE13522_WT_VS_IFNAR_KO_SKING_T_CRUZI_Y_STRAIN_INF_UP	C7:IMMUNESIGDB: ImmuneSigDB	1.32e-06	0.0127	3.91e-05	0.000382	18	200	ENPP1,PLAC8,ABHD17C,PRELID2,CCL20,OSGIN1,ANG,CORO2A,ANXA4,BHLHE40,SLC22A5,C1QTNF12,MYO6,ISG20,DPYSL2,AHCYL2,RNASE4,MXD1
Coexpression	M9040	GSE33162_HDAC3_KO_VS_HDAC3_KO_4H_LPS_STIM_MACROPHAGE_DN	C7:IMMUNESIGDB: ImmuneSigDB	1.32e-06	0.0127	3.91e-05	0.000382	18	200	B3GALT5,UGT8,PLAUR,RNF186,ANG,CDCP1,CADPS,PRKCD,TNFSF10,CYP27A1,GJB1,VILL,TRIM15,RNF183,TFF3,PNPO,GPA33,MXD1
Coexpression	M9207	GSE40666_WT_VS_STAT1_KO_CD8_TCELL_DN	C7:IMMUNESIGDB: ImmuneSigDB	1.32e-06	0.0127	3.91e-05	0.000382	18	200	PHYKPL,SQOR,QPCT,PLS1,ERO1A,DHRS11,AGPAT2,BHLHE40,MYO6,TNFSF10,ARHGAP26,NAGA,APOBR,RNF43,PTPRJ,C12orf75,SCARB1,RORA
Coexpression	M3022	KAECH_NAIVE_VS_MEMORY_CD8_TCELL_DN	C7:IMMUNESIGDB: ImmuneSigDB	1.32e-06	0.0127	3.91e-05	0.000382	18	200	PFKP,KLF4,S100A6,FCGRT,PRR13,CCL5,BHLHE40,TMEM37,CTNNA1,SORL1,IQGAP2,TNFSF10,ITGB2,GDNF,GGH,CHPT1,CD7,RORA
GO: Cellular Component	GO:0043296	apical junction complex		1.38e-06	0.000861	3.31e-05	0.000232	18	165	AOC1,POF1B,CGN,USP53,EPB41L4B,CAMSAP3,CLDN3,CLDN7,LSR,SHROOM1,CTNNA1,OCLN,CXADR,TJP3,FZD5,MARVELD3,ARHGEF2,EPCAM
GO: Biological Process	GO:0050801	monoatomic ion homeostasis		1.44e-06	0.0097	0.000108	0.00101	47	771	HEXB,ENPP1,F2,CKB,ADORA1,MELTF,CAMK2N1,CLCN2,PIK3CB,AGT,SCNN1A,CCL5,PLCB4,ABCC2,ANPEP,ERO1A,FLVCR1,CP,SLC39A4,XK,CLSTN1,SLC1A1,ABCC6,SLC9A3,MAPK3,ATP1A1,ATP1B1,FXYD2,ATP2A3,SRI,SLC46A1,STEAP2,ITPR3,DIAPH1,SLC39A5,CA2,CA12,SLC26A3,KCNE3,SLC11A2,NOL3,TMPRSS6,ATP13A2,TF,TFRC,CNNM4,SLC39A14
Coexpression Atlas	gudmap_developingLowerUrinaryTract_adult_ureter_1000_k1	DevelopingLowerUrinaryTract_adult_ureter_emap-29479_k-means-cluster#1_top-relative-expression-ranked_1000	Gudmap Mouse MOE430.2	1.44e-06	0.00586	1.2e-05	0.000107	17	149	HEXB,SLCO2B1,ENPP1,LRG1,CLIC5,MTUS1,FBXO32,ANG,ANXA4,TNFSF10,CYP27A1,TMBIM1,BMP2,SULT1A1,SLC44A1,RORA,TM4SF1
Coexpression Atlas	gudmap_developingLowerUrinaryTract_adult_ureter_200	DevelopingLowerUrinaryTract_adult_ureter_emap-29479_top-relative-expression-ranked_200	Gudmap Mouse MOE430.2	1.44e-06	0.00586	1.2e-05	0.000107	17	149	ATP8B1,FAM3D,POF1B,S100A6,CLIC5,MMP7,FXYD3,CP,CLDN3,GDA,TMEM45B,ABCC3,CYP2B6,CEACAM1,LGALS3,TSPAN8,TMPRSS2
Coexpression Atlas	GSM605805_500	gamma delta T cells, Tgd.vg5+.IEL, CD8a+ CD8b- TCRd+ Vg5+ CD44lo, Small Intestine, avg-3	Immgen.org, GSE15907	1.44e-06	0.00586	1.2e-05	0.000107	31	415	ENPP1,B3GALT5,PFKP,CAMK2N1,MTA3,PIK3CB,QPCT,CCL5,OSGIN1,VIPR2,HSD17B7,AOAH,SLC39A4,APOA4,CLSTN1,BHLHE40,MCTP2,TTC39B,SLC36A1,MYO6,TNFSF10,INSIG1,GCNT1,CA2,TCN2,ARRDC4,TF,LGALS3,CD7,EPCAM,PADI2
Coexpression Atlas	gudmap_developingLowerUrinaryTract_P1_ureter_200_k2	DevelopingLowerUrinaryTract_P1_ureter_emap-30363_k-means-cluster#2_top-relative-expression-ranked_200	Gudmap Mouse MOE430.2	1.5e-06	0.00611	1.25e-05	0.000111	8	30	ATP8B1,POF1B,CP,TMEM45B,ABCC3,LGALS3,TSPAN8,TMPRSS2
Coexpression	M5888	RASHI_RESPONSE_TO_IONIZING_RADIATION_2	C2:CGP: Chemical and Genetic Perturbations	1.51e-06	0.0146	4.47e-05	0.000436	14	125	ERBB3,MGLL,KLF4,CLDN7,TRIB3,PCP4L1,ATF3,OCLN,CXADR,IRF1,KLF5,SLC11A2,LAMC2,LGALS3
GO: Biological Process	GO:0042180	cellular ketone metabolic process		1.55e-06	0.0104	0.000115	0.00108	25	292	CEACAM5,CEACAM7,HNF4A,FABP1,CLCN2,AFP,AGT,APOA4,PPARA,SIRT6,CPT1A,TRIB3,DGAT1,ACSL5,CYP2B6,CYP3A5,INSIG1,CEACAM6,CEACAM1,BMP2,NQO1,LPGAT1,NR1H3,MLXIPL,MALRD1
Coexpression Atlas	gudmap_developingLowerUrinaryTract_e13.5_bladder epithelial cells_500_k3	DevelopingLowerUrinaryTract_e13.5_bladder epithelial cells_emap-30875_k-means-cluster#3_top-relative-expression-ranked_500	Gudmap Mouse MOE430.2	1.55e-06	0.00629	1.28e-05	0.000114	13	89	ENPP1,MGAT4A,ATP8B1,PLEKHH1,RBM47,TMEM45B,SORL1,ABCC3,PRSS8,MARVELD3,GLB1L2,LGALS3,TMPRSS2
GO: Biological Process	GO:0006879	intracellular iron ion homeostasis		1.57e-06	0.0106	0.000115	0.00108	12	75	MELTF,FLVCR1,CP,SRI,SLC46A1,STEAP2,SLC11A2,TMPRSS6,ATP13A2,TF,TFRC,SLC39A14
Coexpression	M2410	PEDERSEN_METASTASIS_BY_ERBB2_ISOFORM_4	C2:CGP: Chemical and Genetic Perturbations	1.57e-06	0.0151	4.63e-05	0.000451	13	108	GOLM1,TUBA4A,S100A6,C1orf226,TMEM45B,ABCC3,RAPGEF5,ELOVL2,CEACAM1,TACC1,CA2,LAMC2,SLC16A3
GO: Biological Process	GO:0034377	plasma lipoprotein particle assembly		1.59e-06	0.0107	0.000115	0.00108	8	30	APOA1,APOA2,APOA4,APOB,MTTP,DGAT1,CIDEB,APOM
Coexpression	M12890	ROZANOV_MMP14_TARGETS_UP	C2:CGP: Chemical and Genetic Perturbations	1.62e-06	0.0155	4.73e-05	0.000461	21	267	HLA-DMA,HLA-DMB,ENPP1,PLAC8,SCNN1A,PLCB4,CCL20,PLOD2,ERO1A,CDCP1,TXNIP,SLCO2A1,SOD3,GBP3,ISG20,CA12,ARRDC4,NR1H3,TNFRSF11B,SLC16A4,SERPINA5
Coexpression	M39258	MENON_FETAL_KIDNEY_8_CONNECTING_TUBULE_CELLS	C8: Cell Type Signature	1.62e-06	0.0155	4.73e-05	0.000461	21	267	S100A6,TFCP2L1,CAMK2N1,NDRG1,SERPINF2,RBM47,SELENOP,ATP1A1,ATP1B1,MUC1,FXYD2,MYO6,KIF12,CA2,NPNT,CA12,TRIM2,ABLIM1,LLGL2,EPCAM,CDH16
Coexpression	M1806	BOCHKIS_FOXA2_TARGETS	C2:CGP: Chemical and Genetic Perturbations	1.66e-06	0.0159	4.83e-05	0.000471	28	433	HGD,SQOR,TTR,LRG1,HAVCR1,SERPINA1,FGB,PLG,SERPINF2,ALDOB,PLOD2,PPARA,INSIG1,PBLD,NR1I2,RAB3B,SLC39A5,INHBE,ARRDC4,GPR35,CRYL1,MLXIPL,EFNA1,RASSF6,SH3D19,SCARB1,ARHGAP12,MXD1
Coexpression	M12795	CHARAFE_BREAST_CANCER_BASAL_VS_MESENCHYMAL_UP	C2:CGP: Chemical and Genetic Perturbations	1.67e-06	0.016	4.84e-05	0.000472	14	126	SCNN1A,FXYD3,KIAA1522,PRR15L,ZFP36,ATP1A1,RNF39,MUC1,PRSS8,RNF43,RAB25,SLC11A2,ELMO3,ELF3
Coexpression Atlas	Facebase_RNAseq_e8.5_Non-Floor Plate Neural Epithelium_2500_K1	FacebaseRNAseq_e8.5_Non-Floor Plate Neural Epithelium_top-relative-expression-ranked_2500_k-means-cluster#1	FaceBase_RNAseq	1.67e-06	0.0068	1.38e-05	0.000123	51	878	HLA-DMA,ENPP1,TMEM176A,MGLL,CYP2S1,KLF4,CLIC5,FCGRT,SH3RF2,RBM47,CXCL5,ALOX15B,EPB41L4B,ANXA4,CXCL14,SLC1A1,ZFP36,SEMA4G,LPIN3,ZFYVE28,SLCO2A1,RAB11FIP5,PCP4L1,FXYD2,MUC4,CTSS,PAG1,MASP1,NAAA,ARHGAP26,GDPD2,ISG20,APOBR,GGH,IGSF10,BMP8B,MTMR11,CHPT1,PTPRJ,VILL,LAMA2,LGALS4,LGALS9,SLC22A18,MLXIPL,C1orf115,RNASE4,EFNA1,RASA4,HSD17B11,TM4SF1
GO: Biological Process	GO:0009607	response to biotic stimulus		1.68e-06	0.0113	0.00012	0.00113	94	1998	CEACAM5,ENPP1,CEACAM7,B3GALT5,LDOC1,KLF4,F2,HNF4A,LRG1,PLAC8,FER1L6,S100A6,HAVCR1,SCD,FGB,CCL5,MMP7,CCL20,RBM47,CXCL5,VIL1,FLNB,ANG,UBD,MOGAT2,KIF16B,MYO18A,DUOX2,CXCL14,APOA4,APOB,CLDN3,ZFP36,IFNGR1,TXNIP,IGF2,LRRC19,TMEM45B,SLC22A5,C15orf48,NT5C2,RAB11FIP5,PRKCD,ATF3,MAPK3,ATP1B1,MUC4,CTSS,IL6R,CXADR,DGAT1,PRSS3,MASP1,CYP2B6,ERAP1,CDHR2,CEACAM6,IRF1,GBP3,IRF7,ISG20,TNFRSF11A,PTAFR,TRIM14,IL22RA…
Coexpression	M5792	LI_AMPLIFIED_IN_LUNG_CANCER	C2:CGP: Chemical and Genetic Perturbations	1.68e-06	0.0161	4.84e-05	0.000472	17	183	ERBB3,CEACAM5,PFKP,HPN,SCNN1A,FGB,VEGFA,ATP1B1,MUC1,ABCC3,CEACAM6,GIPR,NQO1,TRIM2,TFF3,SLC22A18,TSPAN8
Coexpression	M7635	GSE21360_TERTIARY_VS_QUATERNARY_MEMORY_CD8_TCELL_UP	C7:IMMUNESIGDB: ImmuneSigDB	1.68e-06	0.0161	4.84e-05	0.000472	17	183	HEXB,FCGRT,SELENOP,CPT1A,MUC1,ABCC3,PECR,NAAA,GCNT1,CPEB2,DPYSL2,RCAN1,TCN2,GPX3,AHCYL2,USP2,SCARB1
Coexpression	M2206	CHYLA_CBFA2T3_TARGETS_DN	C2:CGP: Chemical and Genetic Perturbations	1.71e-06	0.0165	4.93e-05	0.000481	20	246	TSPAN15,TLCD4,MGLL,GOLM1,SQOR,CLCN2,HPN,C15orf48,C1QTNF12,IRF7,ISG20,NAGS,KLF5,NQO1,P4HA2,TRIM2,SLC11A2,AHCYL2,TSPAN8,PC
Coexpression Atlas	gudmap_dev gonad_e13.5_M_SertoliCell_Sox9_k2_500	dev gonad_e13.5_M_SertoliCell_Sox9_k-means-cluster#2_top-relative-expression-ranked_500	Gudmap Mouse ST 1.0	1.79e-06	0.00727	1.47e-05	0.000131	18	168	TSPAN15,ERBB3,ME1,ADORA1,PLOD2,VSIG10,SLC6A8,CADPS,MASP1,ACSS2,GDNF,TACC1,RAB3B,RCAN1,GREM2,KIAA1217,ENTPD5,PADI2
Transcription Factor Binding Site	M29994	HES2_TARGET_GENES	MSigDB	1.8e-06	0.00182	8.25e-05	0.000618	60	1438	HGD,PLCXD1,SQOR,S100A6,HAVCR1,NDRG1,PRR13,SCNN1A,CCL20,GLTPD2,PLOD2,FLNB,CP,CLDN7,BHLHE40,TDP2,SLC51B,IFNGR1,C1orf226,TRIB3,CIDEC,ATF3,MAPK3,C11orf86,MUC1,IL6R,CXADR,ABCC3,MASP1,PECR,IQGAP2,ARHGAP26,SRI,ISG20,ACSS2,TMBIM1,CFB,CAPN8,KLF5,BUD31,P4HA2,INHBE,TCF7L2,ADAP1,RCAN1,CECR2,RBP4,TRIM31,NR1H3,RHOT2,SYT7,TFRC,ABLIM1,SLC44A1,EFNA1,LMO7,TM4SF4,HSD17B11,TM4SF1,LRRFIP2
GO: Biological Process	GO:0030155	regulation of cell adhesion		1.81e-06	0.0122	0.000126	0.00118	55	972	PCSK5,ERBB3,CEACAM5,HLA-DMA,HLA-DMB,ENPP2,CEACAM7,ACVRL1,KLF4,DSCAML1,MELTF,PIK3CB,FGB,CCL5,PLAUR,PLG,SERPINF2,VEGFA,VTN,EPB41L4B,CAMSAP3,APOA1,CLDN7,PPARA,IFNGR1,IGF2,PLPP3,PRKCD,FUT2,MUC1,MUC4,IL2RG,IL6R,PAG1,TNFSF9,CEACAM6,IRF1,SPOCK2,GCNT1,PTAFR,ITGB2,CEACAM1,BMP2,PTPRJ,NPNT,NDNF,DPP4,LAMA2,LGALS3,TFRC,LGALS9,HHLA2,EFNA1,LMO7,EPCAM
GO: Biological Process	GO:0042304	regulation of fatty acid biosynthetic process		1.81e-06	0.0122	0.000126	0.00118	12	76	CEACAM5,CEACAM7,HNF4A,AGT,APOA4,TRIB3,INSIG1,CEACAM6,CEACAM1,LPGAT1,NR1H3,MLXIPL
GO: Biological Process	GO:0050819	negative regulation of coagulation		1.81e-06	0.0122	0.000126	0.00118	12	76	CEACAM5,CEACAM7,F2,FGB,PLAUR,PLG,SERPINF2,VTN,PRKCD,CEACAM6,CEACAM1,TSPAN8
Coexpression	M34011	BLANCO_MELO_COVID19_SARS_COV_2_INFECTION_A594_CELLS_DN	C2:CGP: Chemical and Genetic Perturbations	1.82e-06	0.0175	5.21e-05	0.000508	11	77	HLA-DMB,VIL1,PRR15L,MYO1A,ANKS4B,RNF43,DPEP1,LINC01559,GPX2,TM4SF4,PRR15
Coexpression Atlas	GSM605862_500	Myeloid Cells, MF.Thio5.II-480hi.PC, CD115+ MHC II- F480hi Siglec F-, Peritoneal Cavity, avg-3	Immgen.org, GSE15907	1.82e-06	0.00741	1.5e-05	0.000133	32	441	ENPP1,SQOR,S100A6,FCGRT,PLAUR,FBXO32,RBM47,FLNB,SELENOP,ANPEP,ANXA4,AOAH,GDA,PLPP3,RAB11FIP5,CTSS,PTAFR,TMBIM1,CEACAM1,GGH,BMP2,EGLN3,TCN2,TF,LGALS3,CRYL1,P2RX4,GUSB,SERPINB1,CD68,PAM,STOM
Coexpression	MM1113	RASHI_RESPONSE_TO_IONIZING_RADIATION_2	M2:CGP: Chemical and Genetic Perturbations	1.83e-06	0.0176	5.25e-05	0.000512	14	127	ERBB3,MGLL,KLF4,CLDN7,TRIB3,PCP4L1,ATF3,OCLN,CXADR,IRF1,KLF5,SLC11A2,LAMC2,LGALS3
GO: Cellular Component	GO:0031983	vesicle lumen		1.85e-06	0.00116	4.29e-05	0.000301	27	337	HEXB,AOC1,TTR,LRG1,PLAC8,SERPINA1,SERPINA4,FGB,QPCT,PLG,SERPINF2,VEGFA,SELENOP,APOA1,APOB,IGF2,PRKCD,GGH,MVP,TCN1,TF,ORM1,GUSB,SERPINB1,CDA,ARHGAP45,PADI2
Coexpression	M2019	MIKKELSEN_MEF_HCP_WITH_H3K27ME3	C2:CGP: Chemical and Genetic Perturbations	1.85e-06	0.0178	5.28e-05	0.000514	34	591	CDX1,CDX2,RIMKLA,ACHE,B3GALT5,DSCAML1,UGT8,HRH2,DEGS2,GOLGA7B,POU4F1,CDCP1,LSR,SLC9A3,AATK,SLC15A1,RASEF,SLC45A1,PDX1,PAQR5,KIF12,NAGS,BMP8B,MARVELD3,TTC22,SLC27A2,WSCD1,AMN,LAMC2,GRIK3,SYT7,TMPRSS2,PADI2,RSPO1
Coexpression Atlas	GSM854303_500	Myeloid Cells, GN.Arth.BM, CD11b+ Ly6-G+, Bone marrow, avg-3	Immgen.org, GSE15907	1.85e-06	0.00753	1.52e-05	0.000135	31	420	HK2,MGLL,ACVRL1,SQOR,LRG1,S100A6,MTUS1,PIK3CB,PRR13,PLAUR,RBM47,AOAH,AGPAT2,GDA,C15orf48,MAPK3,DGAT1,SORL1,MYO1D,PTAFR,APOBR,CEACAM1,TCN2,OAS3,LGALS3,ORM1,SLC16A3,PAK1,SERPINB1,LY75,MXD1
Coexpression Atlas	Facebase_RNAseq_e10.5_Olfactory Pit_2500_K4	FacebaseRNAseq_e10.5_Olfactory Pit_top-relative-expression-ranked_2500_k-means-cluster#4	FaceBase_RNAseq	1.86e-06	0.00758	1.53e-05	0.000136	36	529	HLA-DMA,ENPP1,MGLL,CYP2S1,FCGRT,SH3RF2,RBM47,CXCL5,ALOX15B,ANXA4,CXCL14,SLC1A1,LPIN3,ZFYVE28,SLCO2A1,PCP4L1,MUC4,CTSS,MASP1,NAAA,MYO1D,ARHGAP26,ISG20,APOBR,GGH,IGSF10,BMP8B,MTMR11,CHPT1,VILL,CALML4,LGALS4,LGALS9,C1orf115,EFNA1,RASA4
Coexpression	M259	MANALO_HYPOXIA_UP	C2:CGP: Chemical and Genetic Perturbations	1.89e-06	0.0182	5.37e-05	0.000524	18	205	ENPP1,NDRG1,AK4,PLOD2,VEGFA,ERO1A,BHLHE40,TXNIP,SLC6A8,MXI1,DIAPH2,P4HA2,EGLN3,INHBE,RGS3,RNASE4,P4HA1,PAM
Coexpression	MM973	CHIARADONNA_NEOPLASTIC_TRANSFORMATION_KRAS_DN	M2:CGP: Chemical and Genetic Perturbations	1.94e-06	0.0187	5.51e-05	0.000537	15	146	PFKP,PLAC8,RAB11FIP5,ATF3,SRI,BMP8B,ATP11A,CALML4,PAPSS2,LGALS9,ABLIM1,RNASE4,LLGL2,SH3D19,CD151
Coexpression	M2684	ATF2_UP.V1_DN	C6: Oncogenic Signature	1.95e-06	0.0187	5.51e-05	0.000537	17	185	SCD,AK4,PLS1,VTN,ERO1A,HKDC1,BHLHE40,HAPLN1,PNMA2,ABCC3,MYO1D,CFB,GALNT12,TNFRSF11B,RNASE4,CD68,PC
Coexpression Atlas	gudmap_kidney_adult_RenalCapsule_k3_500	kidney_adult_RenalCapsule_k-means-cluster#3_top-relative-expression-ranked_500	Gudmap Mouse MOE430.2	1.97e-06	0.00803	1.62e-05	0.000144	8	31	TMEM176A,SQOR,NDRG1,SELENOP,ANPEP,GCNT1,GPX3,PAPSS2
Coexpression	M2205	CHYLA_CBFA2T3_TARGETS_UP	C2:CGP: Chemical and Genetic Perturbations	2.03e-06	0.0195	5.72e-05	0.000557	26	388	TMEM144,MFNG,MTA3,MOGAT2,MISP,AATK,RAB11FIP5,CIDEB,GCHFR,PTPRJ,VILL,LPGAT1,CALML4,TMEM150B,EGLN3,ADAP1,TCN2,NR1H3,ATP13A2,ATP10A,TF,SERPINB1,PAM,CDA,NOSTRIN,ARHGEF2
Coexpression Atlas	gudmap_dev gonad_e13.5_F_SupCellPrec_Sry_500	dev gonad_e13.5_F_SupCellPrec_Sry_top-relative-expression-ranked_500	Gudmap Mouse ST 1.0	2.04e-06	0.00832	1.67e-05	0.000149	31	422	ENPP2,ME1,SIAE,SEMA6D,MTA3,CGN,ANPEP,ANXA4,CAMSAP3,SEMA4G,PRKCD,ATF3,NAAA,ARHGAP26,ABHD3,GATM,GDPD2,BMP2,CHPT1,GRIK3,GLB1L2,SH3D21,TFRC,CRYL1,EFNA1,SLC16A4,LMO7,PCSK6,HSD17B11,RSPO1,STOM
GO: Biological Process	GO:0071827	plasma lipoprotein particle organization		2.07e-06	0.0139	0.000141	0.00132	10	52	AGT,APOA1,APOA2,APOA4,APOB,MTTP,DGAT1,CIDEB,APOM,SCARB1
GO: Biological Process	GO:0019432	triglyceride biosynthetic process		2.07e-06	0.0139	0.000141	0.00132	10	52	MOGAT2,AGPAT2,LPIN3,MOGAT3,DGAT1,ACSL5,LPGAT1,TCF7L2,NR1H3,SCARB1
Coexpression	M39077	ZHONG_PFC_MAJOR_TYPES_MICROGLIA	C8: Cell Type Signature	2.07e-06	0.0199	5.8e-05	0.000566	28	438	HEXB,SLCO2B1,MGAT4A,SERPINF1,SERPINA1,FCGRT,PRR13,ABCG2,ANXA4,AOAH,ZFP36,IFNGR1,CTSS,IL6R,SORL1,PAG1,NAGA,GATM,PTAFR,ITGB2,TMBIM1,TACC1,C12orf75,CXCL16,P2RX4,ARHGAP12,CD68,STOM
Coexpression	M9911	WOO_LIVER_CANCER_RECURRENCE_DN	C2:CGP: Chemical and Genetic Perturbations	2.07e-06	0.0199	5.8e-05	0.000566	11	78	EPHX2,HGD,HNF4A,PPARA,PLPP3,MTTP,ACSL5,CYP27A1,SULT1B1,CRYL1,PC
Coexpression	M19439	DOANE_BREAST_CANCER_ESR1_UP	C2:CGP: Chemical and Genetic Perturbations	2.15e-06	0.0207	6.02e-05	0.000587	13	111	SCNN1A,MUC1,TJP3,CYP2B6,MYO6,ELOVL2,CFB,SEMA3B,SLC27A2,CA12,SLC44A4,TFF3,SERPINA5
Coexpression Atlas	GSM854262_500	Myeloid Cells, DC.103-11b+.SI, CD45+ MHCII+ CD11c-hi CD11b+ CD103- F4/80+, Small Intestine, avg-7	Immgen.org, GSE15907	2.17e-06	0.00881	1.77e-05	0.000157	29	381	HK2,HLA-DMA,SLCO2B1,MGAT4A,TMEM176A,SEMA6D,PLAUR,RBM47,SELENOP,TMEM176B,ANPEP,AOAH,CP,ZFP36,GDA,ATF3,CTSS,ABCC3,INSIG1,CYP27A1,GATM,TNFRSF11A,CFB,GPX3,CXCL16,TF,LGALS3,TSPAN8,CD68
Coexpression	M40271	DESCARTES_FETAL_PANCREAS_DUCTAL_CELLS	C8: Cell Type Signature	2.21e-06	0.0213	6.17e-05	0.000602	14	129	CDX2,ADORA1,SCNN1A,DEGS2,MMP7,MUC20,ANXA4,HKDC1,SLC3A1,ATP1A1,ATP1B1,PAQR5,SLC17A4,ELF3
Coexpression Atlas	gudmap_developingKidney_e15.5_Medullary collecting duct_100_k1	DevelopingKidney_e15.5_Medullary collecting duct_emap-28063_k-means-cluster#1_top-relative-expression-ranked_100	Gudmap Mouse MOE430.2	2.22e-06	0.00904	1.81e-05	0.000161	5	9	RBM47,TMEM45B,KIF12,TMPRSS2,CDH16
Coexpression Atlas	PCBC_MESO-5_fibroblast_500	Progenitor-Cell-Biology-Consortium_induced-Mesoderm_from_inducedPluripotentialStemCells_derived from_from_fibroblast_top-relative-expression-ranked_500	PCBC	2.25e-06	0.00916	1.83e-05	0.000163	34	489	FOXA3,HNF4A,MYORG,ADORA1,VIL1,CAMSAP3,APOA1,APOA2,CLDN3,FADS6,LSR,SLCO2A1,FRZB,PRSS8,GATM,PAQR5,TNFRSF11A,ELOVL2,BMP2,TMEM92,FZD5,B4GALNT3,RAB25,RAB17,GRIK3,USH1C,GREM2,USP2,MLXIPL,ABCC6P1,EFNA2,LLGL2,TMPRSS2,EPCAM
Coexpression	M2630	E2F1_UP.V1_DN	C6: Oncogenic Signature	2.26e-06	0.0217	6.28e-05	0.000612	17	187	ERBB3,F3,MMP7,CXCL5,SEMA4B,ANXA4,CPT1A,SLC1A1,SLC6A8,TRIB3,ASL,RAB11FIP5,ATP2A3,CALML4,SLC11A2,ABLIM1,STOM
GO: Biological Process	GO:2000147	positive regulation of cell motility		2.32e-06	0.0157	0.000157	0.00147	45	737	PCSK5,ENPP2,F3,SEMA6D,SH3RF2,PIK3CB,AGT,CCL5,MMP7,CCL20,PLG,VEGFA,DUOXA2,VIL1,SEMA4B,VTN,EPB41L4B,DUOX2,CXCL14,CLDN3,CLDN7,SEMA4G,IGF2,PLPP3,MAPK3,IL6R,CEACAM6,SPOCK2,PTAFR,BMP2,PTPRJ,SEMA3B,DIAPH1,RAB25,LAMC2,CXCL16,TF,LGALS3,LGALS9,P2RX4,SCARB1,PAK1,CD151,ARHGEF2,EPCAM
Coexpression Atlas	gudmap_developingLowerUrinaryTract_P1_bladder_B_1000_k3	DevelopingLowerUrinaryTract_P1_bladder_B_emap-30374_k-means-cluster#3_top-relative-expression-ranked_1000	Gudmap Mouse MOE430.2	2.32e-06	0.00946	1.88e-05	0.000167	15	122	GCNT3,ENPP1,TLCD4,ATP8B1,TTR,S100A6,DEGS2,FXYD3,FA2H,ANXA4,SDCBP2,PAQR5,ATP10B,TF,TMPRSS2
Coexpression	M5948	HALLMARK_BILE_ACID_METABOLISM	H: Hallmark	2.38e-06	0.0229	6.61e-05	0.000644	13	112	EPHX2,TTR,TFCP2L1,APOA1,ACSL5,PECR,CYP27A1,RETSAT,SULT1B1,NR1I2,SLC27A2,SLC22A18,HSD17B11
GO: Biological Process	GO:1901135	carbohydrate derivative metabolic process		2.39e-06	0.0161	0.000159	0.00149	64	1209	HEXB,HINT1,HK2,ABO,GCNT3,ENPP1,MGAT4A,B3GALT5,PFKP,ST6GALNAC6,HNF4A,SERPINA1,MGAT3,UGT8,AK4,ABCG2,SMPD3,ALDOB,PLOD2,FA2H,AOAH,HKDC1,PPARA,ABCC6,SLC51B,GDA,FAR2,NT5C2,PRKCD,PRKCSH,FUT2,ATP1B1,URAD,DGAT1,ACSL5,GALNT3,NAGA,SPOCK2,GCNT1,ACSS2,ELOVL2,ITIH2,BMP2,SULT1B1,SULT1A1,B4GALNT3,SLC27A2,NDNF,DPEP1,HNF1A,TCF7L2,SRD5A3,GALNT12,B3GNT7,MAP7,PAPSS2,CRYL1,SLC35A3,GUCY2C,GUSB,PCSK6,ENTPD5,RORA,CDA
Coexpression	MM1233	BOCHKIS_FOXA2_TARGETS	M2:CGP: Chemical and Genetic Perturbations	2.42e-06	0.0233	6.69e-05	0.000652	29	467	HGD,SQOR,TTR,LRG1,HAVCR1,SERPINA1,FGB,PLG,SERPINF2,ALDOB,PLOD2,PPARA,CYP3A5,INSIG1,PBLD,NR1I2,RAB3B,SLC39A5,INHBE,ARRDC4,GPR35,CRYL1,MLXIPL,EFNA1,RASSF6,SH3D19,SCARB1,ARHGAP12,MXD1
Coexpression	M3069	LENAOUR_DENDRITIC_CELL_MATURATION_DN	C2:CGP: Chemical and Genetic Perturbations	2.43e-06	0.0234	6.69e-05	0.000652	14	130	SERPINF1,ME1,TUBA4A,SERPINA1,PLAUR,CXCL5,ANPEP,TXNIP,ATP2A3,IL2RG,IL6R,SORL1,IRF7,PTAFR
Coexpression Atlas	gudmap_kidney_adult_JuxtaGlom_Ren1_Captopr_k4_200	kidney_adult_JuxtaGlom_Ren1_Captopr_k-means-cluster#4_top-relative-expression-ranked_200	Gudmap Mouse MOE430.2	2.43e-06	0.0099	1.97e-05	0.000175	9	42	NDRG1,SELENOP,ATP1B1,FXYD2,GATM,SLC27A2,GPX3,TMPRSS2,CDH16
GO: Biological Process	GO:0006873	intracellular monoatomic ion homeostasis		2.47e-06	0.0166	0.000163	0.00153	41	645	HEXB,F2,CKB,ADORA1,MELTF,PIK3CB,AGT,SCNN1A,CCL5,PLCB4,ABCC2,ERO1A,FLVCR1,CP,SLC39A4,XK,CLSTN1,SLC1A1,SLC9A3,MAPK3,ATP1A1,ATP1B1,FXYD2,ATP2A3,SRI,SLC46A1,STEAP2,ITPR3,DIAPH1,SLC39A5,CA2,SLC26A3,KCNE3,SLC11A2,NOL3,TMPRSS6,ATP13A2,TF,TFRC,CNNM4,SLC39A14
Coexpression Atlas	gudmap_developingKidney_e15.5_anlage of loop of Henle_200	DevelopingKidney_e15.5_anlage of loop of Henle_emap-31283_top-relative-expression-ranked_200	Gudmap Mouse MOE430.2	2.5e-06	0.0102	2.02e-05	0.000179	17	155	RGMB,MGAT4A,HNF4A,TFCP2L1,AFP,ALDOB,RBM47,VEGFA,SGPP2,ATP1B1,FXYD2,PRDM16,PAQR5,GDNF,GGT1,DPP4,CDH16
GO: Biological Process	GO:0098657	import into cell		2.52e-06	0.017	0.000165	0.00155	25	300	AGT,SCNN1A,SMPD3,SLC1A1,SLC9A3,SLC15A1,PRKCD,ATP1A1,ATP1B1,FXYD2,ACSL5,SLC36A1,SLC46A1,STEAP2,GDNF,SLC36A2,RAB3B,SLC38A3,CA2,SLC27A2,SLC11A2,RBP4,ACE2,SLC39A14,SLC6A14
Coexpression Atlas	gudmap_developingKidney_e15.5_Pelvic Mesenchyme_500_k1	DevelopingKidney_e15.5_Pelvic Mesenchyme_emap-8241_k-means-cluster#1_top-relative-expression-ranked_500	Gudmap Mouse MOE430.2	2.56e-06	0.0104	2.07e-05	0.000184	8	32	HNF4A,AFP,ALDOB,C1QTNF12,FXYD2,TINAG,AMN,ACE2
Coexpression Atlas	gudmap_developingKidney_e15.5_Pelvic Mesenchyme_1000_k3	DevelopingKidney_e15.5_Pelvic Mesenchyme_emap-8241_k-means-cluster#3_top-relative-expression-ranked_1000	Gudmap Mouse MOE430.2	2.57e-06	0.0105	2.07e-05	0.000184	13	93	HNF4A,TTR,MEP1A,AFP,ALDOB,FXYD2,GALNT3,TMEM135,GGT1,TINAG,CALML4,AMN,ACE2
GO: Biological Process	GO:0019637	organophosphate metabolic process		2.58e-06	0.0174	0.000167	0.00157	59	1084	HEXB,HINT1,HK2,ENPP1,ENPP2,PFKP,HNF4A,ME1,CKB,PIK3CB,AK4,SMPD3,ALDOB,ALOX15B,AGPAT2,HKDC1,APOA1,APOA2,APOA4,PPARA,ABCC6,GDA,FAR2,PLPP3,NT5C2,PRKCD,ATP1B1,URAD,IPMK,DGAT1,ACSL5,NAAA,ABHD3,PTAFR,ACSS2,ELOVL2,ITPKA,SULT1B1,SULT1A1,CHPT1,NQO1,LPGAT1,SLC27A2,DPEP1,HNF1A,SRD5A3,NR1H3,SLC44A4,PAPSS2,PNPO,CRYL1,SLC44A1,GUCY2C,SCARB1,ENTPD5,RORA,CDA,PC,ENTPD8
Coexpression Atlas	gudmap_developingLowerUrinaryTract_P1_bladder_J_100_k3	DevelopingLowerUrinaryTract_P1_bladder_J_emap-30374_k-means-cluster#3_top-relative-expression-ranked_100	Gudmap Mouse MOE430.2	2.59e-06	0.0105	2.08e-05	0.000185	7	23	ATP8B1,POF1B,TMEM45B,ABCC3,LGALS3,TSPAN8,TMPRSS2
GO: Biological Process	GO:0015914	phospholipid transport		2.61e-06	0.0176	0.000168	0.00158	14	107	ATP8B1,FABP1,PRELID2,GLTPD2,APOA1,APOA2,APOA4,MTTP,PRKCD,ANO9,ATP10B,ATP11A,ATP10A,SCARB1
Coexpression	M5662	GSE6269_E_COLI_VS_STREP_PNEUMO_INF_PBMC_DN	C7:IMMUNESIGDB: ImmuneSigDB	2.63e-06	0.0253	7.23e-05	0.000705	16	169	ANG,ERO1A,ASL,DGAT1,CYP27A1,CEACAM6,CEACAM1,GGH,STBD1,TCN1,ORM1,RNASE4,EVA1B,CLMN,CDA,PADI2
Coexpression	MM866	MIKKELSEN_MEF_HCP_WITH_H3K27ME3	M2:CGP: Chemical and Genetic Perturbations	2.67e-06	0.0257	7.31e-05	0.000713	34	601	CDX1,CDX2,RIMKLA,ACHE,B3GALT5,DSCAML1,UGT8,HRH2,DEGS2,GOLGA7B,POU4F1,CDCP1,LSR,SLC9A3,AATK,SLC15A1,RASEF,SLC45A1,PDX1,PAQR5,KIF12,NAGS,BMP8B,MARVELD3,TTC22,SLC27A2,WSCD1,AMN,LAMC2,GRIK3,SYT7,TMPRSS2,PADI2,RSPO1
GO: Biological Process	GO:1903530	regulation of secretion by cell		2.69e-06	0.0181	0.000171	0.00161	48	813	CEACAM5,ACHE,CEACAM7,F2,HNF4A,FAM3D,ADORA1,CAMK2N1,AGT,FGB,CCL5,SMPD3,FER1L5,ANG,MYO18A,SIRT6,CPT1A,CADPS,RAB11FIP5,C1QTNF12,MCTP2,SRI,PDX1,CEACAM6,TNFRSF11A,PTAFR,ITGB2,GDNF,CEACAM1,GIPR,BMP2,BMP8B,NELL2,RAB3B,HNF1A,DPYSL2,TCF7L2,RBP4,NR1H3,ATP13A2,SYT7,LGALS3,LGALS9,SLC25A22,LLGL2,MALRD1,P2RX4,PAM
Coexpression	M1103	GRAESSMANN_APOPTOSIS_BY_DOXORUBICIN_UP	C2:CGP: Chemical and Genetic Perturbations	2.73e-06	0.0262	7.45e-05	0.000727	53	1151	HEXB,PHYKPL,ERBB3,TUBA4A,TFCP2L1,HPN,SCNN1A,AK4,OSGIN1,VEGFA,CORO2A,FA2H,FLVCR1,SLC39A4,ZFP36,SLC6A8,DOK4,RHPN2,RAB11FIP5,PRKCD,ATF3,ARHGAP27,IL6R,DGAT1,TTC39B,MASP1,PRSS8,GALNT3,IRF7,ISG20,RETSAT,ITGB4,TMBIM1,ITPKA,FZD5,KLF5,LPGAT1,RCAN1,OAS3,AHCYL2,VWA7,ATP13A2,LGALS9,SGK2,SLC25A22,USP2,EFNA1,RASA4,GUSB,SCARB1,CD68,ELF3,PADI2
Coexpression Atlas	gudmap_RNAseq_e11.5_Ureteric_tips_2500_K2	gudmap_RNAseq_e11.5_Ureteric_tips_2500_K2	Gudmap RNAseq	2.79e-06	0.0113	2.23e-05	0.000198	25	304	TSPAN15,HLA-DMB,CARD10,MGLL,PLAC8,CKB,TFCP2L1,HOXC6,CAMK2N1,FOXD2,CXCL14,IGF2,TMEM37,IL2RG,SOD3,RAPGEF5,KIF12,GCHFR,GDNF,ESPN,DPP4,GLB1L2,HSD17B11,PCDH1,CDH16
Coexpression	M4713	GSE2706_R848_VS_LPS_8H_STIM_DC_DN	C7:IMMUNESIGDB: ImmuneSigDB	2.81e-06	0.027	7.65e-05	0.000746	17	190	MGLL,KLF4,SQOR,ALOX15B,ERO1A,BHLHE40,C1orf226,TTC39B,CFB,COBL,MVP,CPEB2,TCN2,TPPP,GPA33,SLC6A14,STOM
Coexpression	M38971	JINESH_BLEBBISHIELD_TRANSFORMED_STEM_CELL_SPHERES_UP	C2:CGP: Chemical and Genetic Perturbations	2.84e-06	0.0273	7.7e-05	0.000751	16	170	FBXO32,MMP7,AGPAT2,TXNIP,PLPP3,SDCBP2,CYP3A5,ABHD3,CEACAM6,NQO1,TMEM163,EGLN3,DPYSL2,TRIM31,LAMC2,ABLIM1
Coexpression	M2194	OHGUCHI_LIVER_HNF4A_TARGETS_DN	C2:CGP: Chemical and Genetic Perturbations	2.84e-06	0.0273	7.7e-05	0.000751	16	170	ERBB3,SLCO2B1,SERPINF1,HAVCR1,SERPINA1,APOA4,ABCC6,SLC3A1,MTTP,CIDEB,MASP1,GCHFR,CEACAM1,APOM,SULT1B1,ENTPD8
Coexpression	M12224	MARTINEZ_RB1_TARGETS_UP	C2:CGP: Chemical and Genetic Perturbations	2.94e-06	0.0283	7.93e-05	0.000774	37	686	EPHX2,SERPINF1,MGLL,HNF4G,LRG1,FABP1,SCD,CCL20,ERO1A,SH3KBP1,CP,APOA4,ZFP36,TXNIP,MISP,IGF2,CIDEC,SLC22A5,FUT2,SDCBP2,IL2RG,ACSL5,SOD3,MASP1,GGT1,CEACAM1,CHPT1,SLC11A2,TF,TFRC,LGALS9,TGFBR3,CRYL1,SLC35A3,PCSK6,PC,STOM
Coexpression	M18107	WILENSKY_RESPONSE_TO_DARAPLADIB	C2:CGP: Chemical and Genetic Perturbations	2.95e-06	0.0284	7.93e-05	0.000774	7	28	HLA-DMA,CCL5,PLAUR,CTSS,PTAFR,ITGB2,CD68
Coexpression	M2183	WANG_ADIPOGENIC_GENES_REPRESSED_BY_SIRT1	C2:CGP: Chemical and Genetic Perturbations	2.95e-06	0.0284	7.93e-05	0.000774	7	28	PFKP,NDRG1,SCD,ERO1A,TRIB3,EGLN3,RBP4
GO: Biological Process	GO:0060429	epithelium development		3.01e-06	0.0203	0.00019	0.00178	93	1998	CDX1,CDX2,CEACAM5,ENPP1,CEACAM7,ACVRL1,KLF4,FOXA3,HNF4A,LRG1,POF1B,PLEKHH1,TBC1D32,TFCP2L1,CLCN2,CLIC5,HPN,PCDH19,AGT,CGN,HRH2,PLAUR,PLS1,ALOX15B,ALPI,VEGFA,VIL1,FLNB,FA2H,ANXA4,SH3KBP1,CAMSAP3,CLDN3,SIRT6,CPT1A,TDP2,ZFP36,TXNIP,MST1,LSR,IGF2,TRIB3,FRZB,ATP1A1,ATP1B1,STX16,SDCBP2,IPMK,TJP3,CAPN12,PRSS8,IQGAP2,MYO6,CDHR2,TMEM135,PDX1,CEACAM6,GDNF,CEACAM1,BMP2,SULT1B1,FZD5,KLF5,DIAPH2,COBL,DMBT1,CA…
Coexpression	M40275	DESCARTES_FETAL_PLACENTA_PAEP_MECOM_POSITIVE_CELLS	C8: Cell Type Signature	3.07e-06	0.0295	8.2e-05	0.000799	16	171	SCNN1A,UGT8,BAIAP2L2,MUC20,SGPP2,TMPRSS4,CP,CLDN3,SLC1A1,SLC15A1,MUC1,KIF12,B4GALNT3,CA12,GPX3,EPCAM
Coexpression	M12498	UEDA_PERIFERAL_CLOCK	C2:CGP: Chemical and Genetic Perturbations	3.07e-06	0.0295	8.2e-05	0.000799	16	171	ERBB3,FOXA3,MYORG,NDRG1,AK4,SERPINF2,PPARA,CPT1A,BHLHE40,LSR,ASL,STBD1,SLC11A2,LGALS9,USP2,LMO7
Coexpression Atlas	GSM605823_500	Myeloid Cells, DC.103-11b+.PolyIC.Lu, CD45 MHCII CD11c CD103 CD11b, Lung, avg-3	Immgen.org, GSE15907	3.08e-06	0.0125	2.45e-05	0.000218	30	409	HK2,HLA-DMA,TMEM176A,KLF4,QPCT,CCL5,PLAUR,RBM47,TMEM176B,ANPEP,BHLHE40,ZFP36,GDA,C15orf48,ATF3,CTSS,TTC39B,NAAA,TNFSF9,GATM,PTAFR,TMBIM1,PTPRJ,CXCL16,TF,LGALS3,PAK1,CD68,NOSTRIN,STOM
Coexpression Atlas	GSM605840_500	Plasmacytoid, DC.pDC.8+.Sp, GR1-PE CD11c-eFluor750 CD8-eFluor480 CD45-APC B220, Spleen, avg-3	Immgen.org, GSE15907	3.08e-06	0.0125	2.45e-05	0.000218	30	409	ERBB3,HLA-DMA,CHDH,PLAC8,HAVCR1,PLAUR,RBM47,SEMA4B,CORO2A,PRKCD,ATP1B1,MCTP2,CTSS,INSIG1,CYP27A1,PAQR5,IRF7,PTAFR,CEACAM1,PTPRJ,TMEM163,TCF7L2,GPR35,ATP13A2,TFRC,SLC44A1,CD7,CD68,SLC39A14,PADI2
Coexpression Atlas	GSM854306_500	Myeloid Cells, GN.Bl, CD11b+ Ly6-G+, Blood, avg-3	Immgen.org, GSE15907	3.08e-06	0.0125	2.45e-05	0.000218	30	409	SQOR,LRG1,S100A6,NDRG1,MTUS1,PRR13,PLAUR,RBM47,OSGIN1,ZFP36,GDA,ATF3,MCTP2,IL6R,DGAT1,SORL1,MYO1D,GCNT1,PTAFR,CEACAM1,EGLN3,TCN2,ARRDC4,OAS3,LGALS3,SLC44A1,SLC16A3,SERPINB1,CD68,MXD1
Coexpression	M4308	SATO_SILENCED_BY_METHYLATION_IN_PANCREATIC_CANCER_1	C2:CGP: Chemical and Genetic Perturbations	3.09e-06	0.0297	8.24e-05	0.000803	27	422	SYN3,SERPINF1,TMEM176A,LDOC1,HNF4A,SERPINA1,MGAT3,SCD,QPCT,CCL5,PLAUR,VTN,PRR15L,APOA2,CLDN3,IGF2,DOK4,ABCC3,CYP2B6,CYP3A5,IRF7,ISG20,APOBR,RBP4,SLC16A4,CDA,CDH17
GO: Biological Process	GO:0046889	positive regulation of lipid biosynthetic process		3.14e-06	0.0212	0.000196	0.00184	15	124	HNF4A,AGT,SMPD3,APOA4,PPARA,IGF2,PRKCD,DGAT1,ACSL5,LPGAT1,TCF7L2,NR1H3,MLXIPL,SCARB1,PC
Coexpression	M828	MASSARWEH_TAMOXIFEN_RESISTANCE_DN	C2:CGP: Chemical and Genetic Perturbations	3.16e-06	0.0304	8.38e-05	0.000817	20	256	HPCAL1,TMEM164,FLNB,TMPRSS4,C1orf226,SLC22A5,IGSF1,SRI,FAXDC2,GCHFR,ELOVL2,ATP11A,NPNT,CA12,TCN1,SLC26A2,TMT1B,RNF183,SCARB1,SERPINA5
GO: Biological Process	GO:0006694	steroid biosynthetic process		3.21e-06	0.0216	0.000198	0.00186	20	209	CLCN2,NPC1L1,OSBPL9,HSD17B7,DHRS11,APOA1,APOB,IGF2,ATP1A1,CYP3A5,INSIG1,CYP27A1,FAXDC2,BMP2,SLC27A2,HNF1A,SRD5A3,MALRD1,SCARB1,HSD17B11
Coexpression	M16842	CHIARADONNA_NEOPLASTIC_TRANSFORMATION_CDC25_DN	C2:CGP: Chemical and Genetic Perturbations	3.22e-06	0.0309	8.52e-05	0.000831	15	152	KLF4,PLAC8,ERO1A,ANXA4,BHLHE40,TRIB3,SRI,ITGB4,TMBIM1,LAMC2,PAPSS2,LGALS9,RNASE4,CD151,ARHGEF2
[truncated: 3,717 more rows]

## Sheet: UP in SMAD1 KO for TOPPFUN
RAB11FIP5
INF2
SH3RF2
CPT1A
PLPP3
CARD10
ATP13A2
HPCAL1
NAGA
FCGRT
LAMA2
GPX3
IGF2
HDHD3
CKB
PAK1
SCD
BMP2
STOM
SLC22A5
TSPAN3
FLVCR1
KIAA1522
ESPN
BHLHE40
DIAPH2
SH3D19
PIK3CB
LPIN3
IRF1
MAPK3
MXI1
KIAA1217
HSD17B11
PRR13
LRRC1
CAMSAP3
LRP4
EFNA2
GCHFR
ERBB3
CD151
ASL
SEMA4B
DGAT1
C1orf226
SLCO2A1
SLC44A1
LINC02381
[truncated: 567 more rows]
