# Supplementary material for: SMAD1 Is Dispensable for CDX2 Induction but Required for the Repression of Ectopic Small-Intestinal Gene Expression in Human-Pluripotent-Stem-Cell-Derived Colonic Organoids
Source: MDPI journal article supplement (doi:10.3390/organoids2040015), 2023-11-14
Supplement: s1 [file s1 › Supplementary Table S4. Oligos used in the study.xlsx]

## Sheet: Sheet1
Primer Name	Species	Sequence	Used for
GATA2 F	human	ACAATTTGCACAACAGGTGC	qPCR
GATA2 R	human	CACAAGATGAATGGGCAGAA	qPCR
HOXA13 F	human	GCACCTTGGTATAAGGCACG	qPCR
HOXA13 R	human	CCTCTGGAAGTCCACTCTGC	qPCR
HOXD13 F	human	CCTCTTCGGTAGACGCACAT	qPCR
HOXD13 R	human	CAGGTGTACTGCACCAAGGA	qPCR
HOXD3 F	human	CACCTCCAATGTCTGCTGAA	qPCR
HOXD3 R	human	CAAAATTCAAGAAAACACACACA	qPCR
MSX2 FWD	human	GGTCTTGTGTTTCCTCAGGG	qPCR
MSX2 REV	human	AAATTCAGAAGATGGAGCGG	qPCR
BCOR-F	human	TGGTGACGCTTCAAAAGCCA	qPCR
BCOR-R	human	GCTAGAATAGACGATGTTTCCCG	qPCR
GATA3-F	human	GCCCCTCATTAAGCCCAAG	qPCR
GATA3-R	human	TTGTGGTGGTCTGACAGTTCG	qPCR
ID1-F	human	CTGCTCTACGACATGAACGG	qPCR
ID1-R	human	GAAGGTCCCTGATGTAGTCGAT	qPCR
ID3-F	human	GAGAGGCACTCAGCTTAGCC	qPCR
ID3-R	human	TCCTTTTGTCGTTGGAGATGAC	qPCR
SMAD7-F	human	TTCCTCCGCTGAAACAGGG	qPCR
SMAD7-R	human	CCTCCCAGTATGCCACCAC	qPCR
SMAD1	human	GGCTGCAAGTCTCCCACCGGAAGGGACTGCCTCATGTCATTTACTGCCGTGTGTGGCGCTGGCCCGAT	guide RNA
SMAD1	human	CGGAAGGGACTGCCTCATGTCATTTACTGCGAATTCTGACGCTGGCCCGAT	Homology domain
DPEP1-F	human	CAAGTGGCCGACCATCTGG	qPCR
DPEP1-R	human	GGGACCCTTGGAACACCATC	qPCR
DPP4-F	human	GGGTCACATGGTCACCAGTG	qPCR
DPP4-R	human	TCTGTGTCGTTAAATTGGGCATA	qPCR
APOB-F	human	TGCTCCACTCACTTTACCGTC	qPCR
APOB-R	human	TAGCGTCCAGTGTGTACTGAC	qPCR
SMAD1	human	GGAGACAGCTTTATTTCACC	Genotyping of HCOs
SMAD1	human	CCCTTAAGCATATAGACAGC	Genotyping of HCOs
