# Supplementary material for: SMAD1 Is Dispensable for CDX2 Induction but Required for the Repression of Ectopic Small-Intestinal Gene Expression in Human-Pluripotent-Stem-Cell-Derived Colonic Organoids
Source: MDPI journal article supplement (doi:10.3390/organoids2040015), 2023-11-14
Supplement: s1 [file s1 › Supplementary Table S5. Antibodies used in the study.xlsx]

## Sheet: Primary Ab.
ANTIBODY	HOST	Cat.	Parent company	Dilution factor
E-Cadherin	Goat Polyclonal	AF648	R&D	1:400
Cdx2	rabbit - monoclonal	Cell Marque EPR2764Y (Sigma 235R-14)	Sigma	1:100
SATB2	rabbit monoclonal	Cell Marque EP281 (Sigma 384R-14)	Sigma	1:100
Smad1 (D59D7) XP® Rabbit	Rabbit monoclonal	6944S.	Cell signaling	1:1,000
α-Tubulin (DM1A) Mouse mAb	Mouse monoclonal	3873T	Cell signaling	1:1,000
SOX2	Rabbit monoclonal	AC-0101RUO	Cell Marque	1:100
Anti-CDX-2, Clone CDX2-88	Mouse monoclonal	AM3925M/NC1701134	Biogenex/fisher	1:300
SOX2	Goat Polyclonal	AF2018-SP	R&D Systems	1:50

## Sheet: Secondary Ab.
ANTIBODY	HOST	Cat.	Parent company	Dilution Factor
Alexa Fluor 488 Donkey anti- Goat	Donkey	A11055	Fisher	1:500
Alexa Fluor 568 Donkey anti-Mouse	Donkey	A10037	Fisher	1:500
Alexa Fluor 647 Donkey anti-Rabbit	Donkey	A31573	Fisher	1:500
Anti-mouse IgG, HRP-linked Antibody	Horse	7076S	cell signaling	1:1,000
Anti-rabbit IgG, HRP-linked Antibody	Goat	7074S	cell signaling	1:1,000
